# Supplementary material for: Quantitative global phosphoproteomics of human umbilical vein endothelial cells after activation of the Rap signaling pathway
Source: Royal Society of Chemistry journal article supplement (doi:10.1039/c3mb25524g), 2013-01-21
Supplement: c3mb25524g.pdf [file c3mb25524g.pdf]

## Supplementary Figure Legends

### ***Supplementary Figure S1***

#### **Overlap of the identified phosphopeptides and phosphosites between 'Forward' and 'Reverse' experiments.**

Venn diagrams showing overlap between 'Forward' and 'Reverse' experiments for the identified unique Class I and Class II phosphopeptides (top left panel), unique Class I phosphopeptides (top right panel), unique Class I phosphosites (bottom left panel) and quantified unique Class I phosphosites (bottom right panel).

### ***Supplementary Figure S2***

#### **Analysis of the number of unique Class I phosphopeptides identified per fraction for the separate 'Forward' and 'Reverse' experiments.**

Bar charts showing the number of unique highest scoring Class I phosphopeptides identified per fraction and the fragmentation methods by which they were identified (higher-energy collisional dissociation (HCD) in yellow, electron transfer dissociation (ETD) in blue, and collision-induced dissociation-multistage activation (CID-MSA) in purple). for the 'Forward' (top panel) and 'Reverse' (bottom panel) experiment. The cumulative amount of identified unique phosphopeptides per fraction is plotted as a grey line, using the y-axis on the right-hand side, in which a cross marks each fraction.

### ***Supplementary Figure S3***

#### **Protein ratios are not greatly affected by 007-AM stimulation.**

Scatter plot in which the  $\log_2$  protein ratios after 007-AM stimulation for the 'Forward' and 'Reverse' experiments are plotted against each other. Proteins of which at least 2 unique peptides were identified and of which the relative standard deviation (RSD) of the determined ratios was  $\leq 30\%$  were included in the scatter plot.

### **Supplementary Figure S4**

**007-AM regulated phosphoproteins are involved in cell-cell adhesion, cell-substratum adhesion, and cell motility as shown by pathway and GO term enrichment analyses.**

(A) Bar chart showing significantly enriched pathways ( $P$ -value  $\leq 0.05$ ). (B) Bar chart showing significantly enriched gene ontology (GO) terms from the biological process (BP) domain ( $P$ -value  $\leq 0.05$ ). (C) Bar chart showing significantly enriched GO terms from the cellular compartment (CC) domain ( $P$ -value  $\leq 0.05$ ). (D) Bar chart showing significantly enriched GO terms from the molecular function (MF) domain ( $P$ -value  $\leq 0.05$ ).
