# Supplementary material for: Quantitative global phosphoproteomics of human umbilical vein endothelial cells after activation of the Rap signaling pathway
Source: Royal Society of Chemistry journal article supplement (doi:10.1039/c3mb25524g), 2013-01-21
Supplement: c3mb25524g.xlsx [file c3mb25524g.xlsx]

## Sheet: Class I Phosphopeptides
Peptide Sequence	# of Phospho-sites	pRS Site Probabilities	pRS Score	Protein Group Accessions	Protein Descriptions	# of Protein Groups	Acc. # 1	Sites Acc. # 1	Protein Names Acc. # 1	Gene Names Acc. # 1	Acc. # 2	Sites Acc. # 2	Protein Names Acc. # 2	Gene Names Acc. # 2	Acc. # 3	Sites Acc. # 3	Protein Names Acc. # 3	Gene Names Acc. # 3	Acc. # 4	Sites Acc. # 4	Protein Names Acc. # 4	Gene Names Acc. # 4	Acc. # 5	Sites Acc. # 5	Protein Names Acc. # 5	Gene Names Acc. # 5	Acc. # 6	Sites Acc. # 6	Protein Names Acc. # 6	Gene Names Acc. # 6	Experiment Identified	Class Type	Sequence (MASCOT)	Search Engine Rank (MASCOT)	Modifications (MASCOT)	IonScore (MASCOT)	Activation Type	Fraction # Identified	# of Missed Cleavages	MH+ [Da]	Charge	m/z [Da]	ΔM [ppm]	RT [min]	Scan #	Spectrum File
RAGGGGGLGAGpSPALSGGQGR	1	S(12): 100.0; S(16): 0.0	565	Q6IQ22	Putative Ras-related protein Rab-12 OS=Homo sapiens GN=RAB12 PE=5 SV=3 - [RAB12_HUMAN]	1	Q6IQ22	S21	Ras-related protein Rab-12	RAB12																					Reverse	Class I	rAGGGGGLGAGsPALSGGQGR	1	N-Term(Dimethyl:2H(4)); S12(Phospho)	144	ETD	30	1	1851.9	3	617.971	-8.13	53.56	3428	20110105_LM_HJ_Epac_Rev_007_F30.raw
VDEGAGDSAAVASGGAQTLALAGpSPAPSGHPK	1	S(8): 0.0; S(13): 0.0; T(18): 0.0; S(24): 100.0; S(28): 0.0	555	Q9NZT2	Opioid growth factor receptor OS=Homo sapiens GN=OGFR PE=1 SV=3 - [OGFR_HUMAN]	1	Q9NZT2	S484	Opioid growth factor receptor (OGFr) (Protein 7-60) (Zeta-type opioid receptor)	OGFR																					Forward	Class I	vDEGAGDSAAVASGGAQTLALAGsPAPSGHPk	1	N-Term(Dimethyl:2H(4)); S24(Phospho); K32(Dimethyl:2H(4))	98	HCD	27	0	2990.47	3	997.496	1.22	104.45	6793	OR5_101221_LM_HJ_Epac1_007_SCX_Phospho_F27.raw
LGDVpSPTQIDVSQFGSFK	1	S(5): 100.0; T(7): 0.0; S(12): 0.0; S(16): 0.0	554	P46821	Microtubule-associated protein 1B OS=Homo sapiens GN=MAP1B PE=1 SV=1 - [MAP1B_HUMAN]	1	P46821	S1501	Microtubule-associated protein 1B (MAP-1B) [Cleaved into: MAP1 light chain LC1]	MAP1B																					Forward	Class I	lGDVsPTQIDVSQFGSFk	1	N-Term(Dimethyl); S5(Phospho); K18(Dimethyl)	97	ETD	13	0	2060.99	3	687.669	-0.44	144.8	9902	OR5_101216_LM_HJ_Epac1_007_SCX_Phospho_F13.raw
EGLGQGQpSLEQLEALVQTK	1	S(8): 100.0; T(18): 0.0	542	Q9NSC5	Homer protein homolog 3 OS=Homo sapiens GN=HOMER3 PE=1 SV=2 - [HOME3_HUMAN]	1	Q9NSC5	S256	Homer protein homolog 3 (Homer-3)	HOMER3																					Forward	Class I	eGLGQGQsLEQLEALVQTk	1	N-Term(Dimethyl); S8(Phospho); K19(Dimethyl)	126	ETD	13	0	2164.08	3	722.032	-3.29	147.66	10098	OR5_101216_LM_HJ_Epac1_007_SCX_Phospho_F13.raw
RSYpSSPDITQAIQEEEK	1	S(2): 0.0; Y(3): 0.0; S(4): 100.0; S(5): 0.0; T(9): 0.0	542	P40818	Ubiquitin carboxyl-terminal hydrolase 8 OS=Homo sapiens GN=USP8 PE=1 SV=1 - [UBP8_HUMAN]	1	P40818	S718	Ubiquitin carboxyl-terminal hydrolase 8 (EC 3.4.19.12) (Deubiquitinating enzyme 8) (Ubiquitin isopeptidase Y) (hUBPy) (Ubiquitin thioesterase 8) (Ubiquitin-specific-processing protease 8)	USP8 KIAA0055 UBPY																					Reverse	Class I	rSYsSPDITQAIQEEEk	1	N-Term(Dimethyl); S4(Phospho); K17(Dimethyl)	97	ETD	28	1	2116.98	3	706.331	-0.78	115.43	7582	20110105_LM_HJ_Epac_Rev_007_F28.raw
RSVAVpSDEEEVEEEAER	1	S(2): 0.0; S(6): 100.0	539	Q9Y6X9	MORC family CW-type zinc finger protein 2 OS=Homo sapiens GN=MORC2 PE=1 SV=2 - [MORC2_HUMAN]	1	Q9Y6X9	S743	MORC family CW-type zinc finger protein 2 (Zinc finger CW-type coiled-coil domain protein 1)	MORC2 KIAA0852 ZCWCC1																					Forward	Class I	rSVAVsDEEEVEEEAER	1	N-Term(Dimethyl); S6(Phospho)	143	ETD	29	1	2070.89	3	690.968	0.96	97.72	6615	OR5_101221_LM_HJ_Epac1_007_SCX_Phospho_F29.raw
LLHEDLDEpSDDDMDEK	1	S(9): 100.0	538	O43150	Development and differentiation-enhancing factor 2 OS=Homo sapiens GN=DDEF2 PE=1 SV=3 - [DDEF2_HUMAN]	1	O43150	S701	Arf-GAP with SH3 domain, ANK repeat and PH domain-containing protein 2 (Development and differentiation-enhancing factor 2) (Paxillin-associated protein with ARF GAP activity 3) (PAG3) (Pyk2 C-terminus-associated protein) (PAP)	ASAP2 DDEF2 KIAA0400																					Forward	Class I	lLHEDLDEsDDDMDEk	1	N-Term(Dimethyl); S9(Phospho); K16(Dimethyl)	96	ETD	27	0	2054.81	3	685.61	-0.02	89.22	5917	OR5_101217_LM_HJ_Epac1_007_SCX_Phospho_F27.raw
QLHLEGASLELpSDDDTESK	1	S(8): 0.0; S(12): 100.0; T(16): 0.0; S(18): 0.0	532	P35580	Myosin-10 OS=Homo sapiens GN=MYH10 PE=1 SV=2 - [MYH10_HUMAN]	1	P35580	S1956	Myosin-10 (Cellular myosin heavy chain, type B) (Myosin heavy chain 10) (Myosin heavy chain, non-muscle IIb) (Non-muscle myosin heavy chain B) (NMMHC-B) (Non-muscle myosin heavy chain IIb) (NMMHC II-b) (NMMHC-IIB)	MYH10																					Reverse	Class I	qLHLEGASLELsDDDTESk	1	N-Term(Dimethyl:2H(4)); S12(Phospho); K19(Dimethyl:2H(4))	119	ETD	28	0	2231.06	3	744.358	0.93	124.04	8021	20110105_LM_HJ_Epac_Rev_007_F28.raw
MLGEDpSDEEEEMDTSER	1	S(6): 100.0; T(14): 0.0; S(15): 0.0	526	Q9BWU0	Kanadaptin OS=Homo sapiens GN=SLC4A1AP PE=1 SV=1 - [NADAP_HUMAN]	1	Q9BWU0	S312	Kanadaptin (Human lung cancer oncogene 3 protein) (HLC-3) (Kidney anion exchanger adapter protein) (Solute carrier family 4 anion exchanger member 1 adapter protein)	SLC4A1AP HLC3																					Forward	Class I	mLGEDsDEEEEMDTSER	1	N-Term(Dimethyl:2H(4)); S6(Phospho)	87	ETD	13	0	2113.78	3	705.264	1.14	93.28	6506	OR5_101216_LM_HJ_Epac1_007_SCX_Phospho_F13.raw
LDLDLTADpSQPPVFK	1	T(6): 0.0; S(9): 100.0	519	Q13263	Transcription intermediary factor 1-beta OS=Homo sapiens GN=TRIM28 PE=1 SV=5 - [TIF1B_HUMAN]	1	Q13263	S501	Transcription intermediary factor 1-beta (TIF1-beta) (E3 SUMO-protein ligase TRIM28) (EC 6.3.2.-) (KRAB-associated protein 1) (KAP-1) (KRAB-interacting protein 1) (KRIP-1) (Nuclear corepressor KAP-1) (RING finger protein 96) (Tripartite motif-containing protein 28)	TRIM28 KAP1 RNF96 TIF1B																					Forward	Class I	lDLDLTADsQPPVFk	1	N-Term(Dimethyl); S9(Phospho); K15(Dimethyl)	129	ETD	14	0	1794.9	3	598.97	1.44	154.94	13098	OR5_101215_LM_HJ_Epac1_007_SCX_Phospho_F14.raw
KETEpSEAEDNLDDLEK	1	T(3): 0.0; S(5): 100.0	516	Q8IYB3	Serine/arginine repetitive matrix protein 1 OS=Homo sapiens GN=SRRM1 PE=1 SV=2 - [SRRM1_HUMAN]	1	Q8IYB3	S874	Serine/arginine repetitive matrix protein 1 (SR-related nuclear matrix protein of 160 kDa) (SRm160) (Ser/Arg-related nuclear matrix protein)	SRRM1 SRM160																					Reverse	Class I	kETEsEAEDNLDDLEk	1	N-Term(Dimethyl:2H(4)); K1(Dimethyl:2H(4)); S5(Phospho); K16(Dimethyl:2H(4))	108	ETD	28	1	2040.96	3	680.992	-1.6	100.37	6756	20110105_LM_HJ_Epac_Rev_007_F28_2.raw
LKpSEDGVEGDLGETQSR	1	S(3): 100.0; T(14): 0.0; S(16): 0.0	513	Q09666	Neuroblast differentiation-associated protein AHNAK OS=Homo sapiens GN=AHNAK PE=1 SV=2 - [AHNK_HUMAN]	1	Q09666	S135	Neuroblast differentiation-associated protein AHNAK (Desmoyokin)	AHNAK PM227																					Forward	Class I	lksEDGVEGDLGETQSR	1	N-Term(Dimethyl:2H(4)); K2(Dimethyl:2H(4)); S3(Phospho)	133	ETD	27	1	1963.95	3	655.32	-0.02	73.17	4919	OR5_101217_LM_HJ_Epac1_007_SCX_Phospho_F27.raw
AAEAGGAEEQYGFLTpTPTK	1	Y(11): 0.0; T(15): 0.0; T(16): 100.0; T(18): 0.0	512	P46821	Microtubule-associated protein 1B OS=Homo sapiens GN=MAP1B PE=1 SV=1 - [MAP1B_HUMAN]	1	P46821	T1067	Microtubule-associated protein 1B (MAP-1B) [Cleaved into: MAP1 light chain LC1]	MAP1B																					Reverse	Class I	aAEAGGAEEQYGFLTtPTk	1	N-Term(Dimethyl:2H(4)); T16(Phospho); K19(Dimethyl:2H(4))	117	ETD	14	0	2085.01	3	695.673	1.34	123.16	9303	20110105_LM_HJ_Epac_Rev_007_F14.raw
ASLGpSLEGEAEAEASpSPK	2	S(2): 0.0; S(5): 100.0; S(15): 0.0; S(16): 100.0	510	Q09666	Neuroblast differentiation-associated protein AHNAK OS=Homo sapiens GN=AHNAK PE=1 SV=2 - [AHNK_HUMAN]	1	Q09666	S5752, S5763	Neuroblast differentiation-associated protein AHNAK (Desmoyokin)	AHNAK PM227																					Reverse	Class I	aSLGsLEGEAEAEASsPk	1	N-Term(Dimethyl:2H(4)); S5(Phospho); S16(Phospho); K18(Dimethyl:2H(4))	108	ETD	7	0	1956.87	3	652.961	-0.07	86.77	6031	20110105_LM_HJ_Epac_Rev_007_F7.raw
REPGGWGAGASAPVEDDpSDAETYGEENDEQGNYSK	1	S(11): 0.0; S(18): 100.0; T(22): 0.0; Y(23): 0.0; Y(33): 0.0; S(34): 0.0	506	Q9NQS1	Cell death regulator Aven OS=Homo sapiens GN=AVEN PE=1 SV=1 - [AVEN_HUMAN]	1	Q9NQS1	S94	Cell death regulator Aven	AVEN																					Forward	Class I	rEPGGWGAGASAPVEDDsDAETYGEENDEQGNYSk	1	N-Term(Dimethyl:2H(4)); S18(Phospho); K35(Dimethyl:2H(4))	109	HCD	28	1	3831.61	3	1277.88	2.42	102.3	7052	OR5_101221_LM_HJ_Epac1_007_SCX_Phospho_F28.raw
DQSTpSMSHINLLFSR	1	S(3): 0.0; T(4): 0.0; S(5): 100.0; S(7): 0.0; S(14): 0.0	500	Q5VUB5	Protein FAM171A1 OS=Homo sapiens GN=FAM171A1 PE=1 SV=1 - [F1711_HUMAN]	1	Q5VUB5	S358	Protein FAM171A1 (Astroprincin)	FAM171A1 C10orf38																					Reverse	Class I	dQSTsMSHINLLFSR	1	N-Term(Dimethyl); S5(Phospho)	103	ETD	27	0	1843.83	3	615.283	-3.76	140.32	9129	20110105_LM_HJ_Epac_Rev_007_F27.raw
ASLGSLEGEAEAEASpSPKGK	1	S(2): 0.0; S(5): 0.0; S(15): 0.3; S(16): 99.7	499	Q09666	Neuroblast differentiation-associated protein AHNAK OS=Homo sapiens GN=AHNAK PE=1 SV=2 - [AHNK_HUMAN]	1	Q09666	S5763	Neuroblast differentiation-associated protein AHNAK (Desmoyokin)	AHNAK PM227																					Reverse	Class I	aSLGSLEGEAEAEASsPkGk	1	N-Term(Dimethyl:2H(4)); S16(Phospho); K18(Dimethyl:2H(4)); K20(Dimethyl:2H(4))	102	HCD	27	1	2094.08	2	1047.54	0.39	131.2	10886	20110114_LM_HJ_Epac_Rev_007_F27_2.raw
LSLEGDHSpTPPSAYGSVK	1	S(2): 0.0; S(8): 0.0; T(9): 100.0; S(12): 0.0; Y(14): 0.0; S(16): 0.0	496	P07355;A6NMY6	Annexin A2 OS=Homo sapiens GN=ANXA2 PE=1 SV=2 - [ANXA2_HUMAN]|Putative annexin A2-like protein OS=Homo sapiens GN=ANXA2P2 PE=5 SV=2 - [AXA2L_HUMAN]	2	P07355	T19	Annexin A2 (Annexin II) (Annexin-2) (Calpactin I heavy chain) (Calpactin-1 heavy chain) (Chromobindin-8) (Lipocortin II) (Placental anticoagulant protein IV) (PAP-IV) (Protein I) (p36)	ANXA2 ANX2 ANX2L4 CAL1H LPC2D	A6NMY6	T19	Putative annexin A2-like protein (Annexin A2 pseudogene 2) (Lipocortin II pseudogene)	ANXA2P2 ANX2L2 ANX2P2 LPC2B																	Reverse	Class I	lSLEGDHStPPSAYGSVk	1	N-Term(Dimethyl:2H(4)); T9(Phospho); K18(Dimethyl:2H(4))	107	ETD	27	0	1988.98	3	663.665	0.08	96.99	6347	20110105_LM_HJ_Epac_Rev_007_F27.raw
ASLGSLEGEAEAEApSSPKGK	1	S(2): 0.0; S(5): 0.0; S(15): 99.7; S(16): 0.3	495	Q09666	Neuroblast differentiation-associated protein AHNAK OS=Homo sapiens GN=AHNAK PE=1 SV=2 - [AHNK_HUMAN]	1	Q09666	S5762	Neuroblast differentiation-associated protein AHNAK (Desmoyokin)	AHNAK PM227																					Forward	Class I	aSLGSLEGEAEAEASsPkGk	1	N-Term(Dimethyl:2H(4)); S16(Phospho); K18(Dimethyl:2H(4)); K20(Dimethyl:2H(4))	91	HCD	27	1	2094.08	2	1047.54	0.39	115.85	7522	OR5_101221_LM_HJ_Epac1_007_SCX_Phospho_F27.raw
HIISATSLSTpSPTELGSR	1	S(4): 0.0; T(6): 0.0; S(7): 0.0; S(9): 0.0; T(10): 0.0; S(11): 100.0; T(13): 0.0; S(17): 0.0	494	Q5JSZ5	Uncharacterized protein KIAA0515 OS=Homo sapiens GN=KIAA0515 PE=1 SV=1 - [K0515_HUMAN]	1	Q5JSZ5	S226	Protein PRRC2B (HLA-B-associated transcript 2-like 1) (Proline-rich coiled-coil protein 2B)	PRRC2B BAT2L BAT2L1 KIAA0515																					Forward	Class I	hIISATSLSTsPTELGSR	1	N-Term(Dimethyl:2H(4)); S11(Phospho)	103	ETD	29	0	1969	3	657.003	0.66	107.17	7166	OR5_101221_LM_HJ_Epac1_007_SCX_Phospho_F29.raw
KSSpSLVDIREEETEGGSR	1	S(2): 0.0; S(3): 0.0; S(4): 100.0; T(13): 0.0; S(17): 0.0	493	Q96Q42	Alsin OS=Homo sapiens GN=ALS2 PE=1 SV=1 - [ALS2_HUMAN]	1	Q96Q42	S466	Alsin (Amyotrophic lateral sclerosis 2 chromosomal region candidate gene 6 protein) (Amyotrophic lateral sclerosis 2 protein)	ALS2 ALS2CR6 KIAA1563																					Reverse	Class I	kSSsLVDIREEETEGGSR	1	N-Term(Dimethyl:2H(4)); K1(Dimethyl:2H(4)); S4(Phospho)	91	ETD	32	2	2123.05	3	708.354	0.55	70.95	4487	20110105_LM_HJ_Epac_Rev_007_F32.raw
SQRYpSGAYGASVSDEELK	1	S(1): 0.0; Y(4): 0.0; S(5): 100.0; Y(8): 0.0; S(11): 0.0; S(13): 0.0	493	Q9NX63	Coiled-coil-helix-coiled-coil-helix domain-containing protein 3, mitochondrial OS=Homo sapiens GN=CHCHD3 PE=1 SV=1 - [CHCH3_HUMAN]	1	Q9NX63	S50	Coiled-coil-helix-coiled-coil-helix domain-containing protein 3, mitochondrial	CHCHD3 MINOS3																					Reverse	Class I	sQRYsGAYGASVSDEELk	1	N-Term(Dimethyl:2H(4)); S5(Phospho); K18(Dimethyl:2H(4))	98	ETD	28	1	2090.99	3	697.667	-0.78	85.41	5901	20110105_LM_HJ_Epac_Rev_007_F28.raw
LGAGGGSPEKpSPSAQELK	1	S(7): 0.0; S(11): 100.0; S(13): 0.0	492	Q9UNE7	STIP1 homology and U box-containing protein 1 OS=Homo sapiens GN=STUB1 PE=1 SV=2 - [STUB1_HUMAN]	1	Q9UNE7	S23	E3 ubiquitin-protein ligase CHIP (EC 6.3.2.-) (Antigen NY-CO-7) (CLL-associated antigen KW-8) (Carboxy terminus of Hsp70-interacting protein) (STIP1 homology and U box-containing protein 1)	STUB1 CHIP PP1131																					Forward	Class I	lGAGGGSPEksPSAQELk	1	N-Term(Dimethyl); K10(Dimethyl); S11(Phospho); K18(Dimethyl)	92	ETD	27	1	1876.94	3	626.319	0.94	61.78	4096	OR5_101221_LM_HJ_Epac1_007_SCX_Phospho_F27.raw
SNpSSSEAVLGQEELSAQAK	1	S(1): 0.0; S(3): 100.0; S(4): 0.0; S(5): 0.0; S(15): 0.0	491	Q9BXF6	Rab11 family-interacting protein 5 OS=Homo sapiens GN=RAB11FIP5 PE=1 SV=1 - [RFIP5_HUMAN]	1	Q9BXF6	S395	Rab11 family-interacting protein 5 (Rab11-FIP5) (Gamma-SNAP-associated factor 1) (Gaf-1) (Phosphoprotein pp75) (Rab11-interacting protein Rip11)	RAB11FIP5 GAF1 KIAA0857 RIP11																					Forward	Class I	sNsSSEAVLGQEELSAQAk	2	N-Term(Dimethyl:2H(4)); S3(Phospho); K19(Dimethyl:2H(4))	119	HCD	13	0	2079.01	2	1040.01	0.56	109.29	7749	OR5_101221_LM_HJ_Epac1_007_SCX_Phospho_F13.raw
AMADELpSEKQVYDAHTK	1	S(7): 100.0; Y(12): 0.0; T(16): 0.0	489	Q03135	Caveolin-1 OS=Homo sapiens GN=CAV1 PE=1 SV=4 - [CAV1_HUMAN]	1	Q03135	S37	Caveolin-1	CAV1 CAV																					Forward	Class I	amADELsEkQVYDAHTk	1	N-Term(Dimethyl); M2(Oxidation); S7(Phospho); K9(Dimethyl); K17(Dimethyl)	102	ETD	31	1	2115.97	3	705.994	-0.41	73.19	4665	OR5_101217_LM_HJ_Epac1_007_SCX_Phospho_F31.raw
EIQNGNLHEpSDSESVPR	1	S(10): 100.0; S(12): 0.0; S(14): 0.0	485	Q86UP2	Kinectin OS=Homo sapiens GN=KTN1 PE=1 SV=1 - [KTN1_HUMAN]	1	Q86UP2	S75	Kinectin (CG-1 antigen) (Kinesin receptor)	KTN1 CG1 KIAA0004																					Reverse	Class I	eIQNGNLHEsDSESVPR	1	N-Term(Dimethyl); S10(Phospho)	117	ETD	28	0	2018.88	3	673.63	-2.67	63.75	4474	20110105_LM_HJ_Epac_Rev_007_F28_2.raw
EAPAEGEAAEPGpSPTAAEGEAASAASSTSSPK	1	S(13): 100.0; T(15): 0.0; S(23): 0.0; S(26): 0.0; S(27): 0.0; T(28): 0.0; S(29): 0.0; S(30): 0.0	485	P29966	Myristoylated alanine-rich C-kinase substrate OS=Homo sapiens GN=MARCKS PE=1 SV=4 - [MARCS_HUMAN]	1	P29966	S118	Myristoylated alanine-rich C-kinase substrate (MARCKS) (Protein kinase C substrate, 80 kDa protein, light chain) (80K-L protein) (PKCSL)	MARCKS MACS PRKCSL																					Forward	Class I	eAPAEGEAAEPGsPTAAEGEAASAASSTSSPk	2	N-Term(Dimethyl); S13(Phospho); K32(Dimethyl)	93	HCD	13	0	3051.34	3	1017.78	1.86	95.64	6860	OR5_101221_LM_HJ_Epac1_007_SCX_Phospho_F13.raw
KLGAGEGGEASVpSPEK	1	S(11): 0.0; S(13): 100.0	484	Q13428	Treacle protein OS=Homo sapiens GN=TCOF1 PE=1 SV=2 - [TCOF_HUMAN]	1	Q13428	S1378	Treacle protein (Treacher Collins syndrome protein)	TCOF1																					Reverse	Class I	kLGAGEGGEASVsPEk	1	N-Term(Dimethyl); K1(Dimethyl); S13(Phospho); K16(Dimethyl)	86	ETD	28	1	1679.82	3	560.612	-2.05	47.73	3409	20110105_LM_HJ_Epac_Rev_007_F28_2.raw
QSFDDNDpSEELEDKDSK	1	S(2): 0.0; S(8): 100.0; S(16): 0.0	483	O60841	Eukaryotic translation initiation factor 5B OS=Homo sapiens GN=EIF5B PE=1 SV=3 - [IF2P_HUMAN]	1	O60841	S113	Eukaryotic translation initiation factor 5B (eIF-5B) (Translation initiation factor IF-2)	EIF5B IF2 KIAA0741																					Reverse	Class I	qSFDDNDsEELEDkDSk	1	N-Term(Dimethyl:2H(4)); S8(Phospho); K14(Dimethyl:2H(4)); K17(Dimethyl:2H(4))	96	ETD	27	1	2176.95	3	726.323	-0.79	67.93	4651	20110105_LM_HJ_Epac_Rev_007_F27_2.raw
RAFQLEEGEEpTEPDCK	1	T(11): 100.0	483	P38432	Coilin OS=Homo sapiens GN=COIL PE=1 SV=1 - [P80C_HUMAN]	1	P38432	T122	Coilin (p80)	COIL CLN80																					Forward	Class I	rAFQLEEGEEtEPDck	1	N-Term(Dimethyl:2H(4)); T11(Phospho); C15(Carbamidomethyl); K16(Dimethyl:2H(4))	100	ETD	29	1	2081.93	3	694.65	0.13	88.93	6091	OR5_101221_LM_HJ_Epac1_007_SCX_Phospho_F29.raw
LTSIGpSDEDEETETYQEK	1	T(2): 0.0; S(3): 0.0; S(6): 100.0; T(12): 0.0; T(14): 0.0; Y(15): 0.0	483	Q9UHW9	Solute carrier family 12 member 6 OS=Homo sapiens GN=SLC12A6 PE=1 SV=2 - [S12A6_HUMAN]	1	Q9UHW9	S1032	Solute carrier family 12 member 6 (Electroneutral potassium-chloride cotransporter 3) (K-Cl cotransporter 3)	SLC12A6 KCC3																					Forward	Class I	lTSIGsDEDEETETYQEk	1	N-Term(Dimethyl); S6(Phospho); K18(Dimethyl)	117	ETD	13	0	2209.93	3	737.315	1.28	93.4	6709	OR5_101221_LM_HJ_Epac1_007_SCX_Phospho_F13.raw
MGpSDGESDQASGTSSDEVQSPTGVCLR	1	S(3): 100.0; S(7): 0.0; S(11): 0.0; T(13): 0.0; S(14): 0.0; S(15): 0.0; S(20): 0.0; T(22): 0.0	483	Q00537	Serine/threonine-protein kinase PCTAIRE-2 OS=Homo sapiens GN=PCTK2 PE=1 SV=2 - [PCTK2_HUMAN]	1	Q00537	S105	Cyclin-dependent kinase 17 (EC 2.7.11.22) (Cell division protein kinase 17) (PCTAIRE-motif protein kinase 2) (Serine/threonine-protein kinase PCTAIRE-2)	CDK17 PCTK2																					Forward	Class I	mGsDGESDQASGTSSDEVQSPTGVcLR	1	N-Term(Dimethyl:2H(4)); S3(Phospho); C25(Carbamidomethyl)	85	HCD	13	0	2869.18	3	957.064	-1.03	103.9	7391	OR5_101221_LM_HJ_Epac1_007_SCX_Phospho_F13.raw
EGTQASEGYFSQpSQEEEFAQSEELCAK	1	T(3): 0.0; S(6): 0.0; Y(9): 0.0; S(11): 0.0; S(13): 100.0; S(21): 0.0	483	Q16643	Drebrin OS=Homo sapiens GN=DBN1 PE=1 SV=3 - [DREB_HUMAN]	1	Q16643	S601	Drebrin (Developmentally-regulated brain protein)	DBN1 D0S117E																					Forward	Class I	eGTQASEGYFSQsQEEEFAQSEELcAk	1	N-Term(Dimethyl:2H(4)); S13(Phospho); C25(Carbamidomethyl); K27(Dimethyl:2H(4))	102	HCD	13	0	3213.37	3	1071.8	1.26	138.04	9399	OR5_101216_LM_HJ_Epac1_007_SCX_Phospho_F13.raw
LVSFHDDpSDEDLLHI	1	S(3): 0.0; S(8): 100.0	482	P11717	Cation-independent mannose-6-phosphate receptor OS=Homo sapiens GN=IGF2R PE=1 SV=2 - [MPRI_HUMAN]	1	P11717	S2484	Cation-independent mannose-6-phosphate receptor (CI Man-6-P receptor) (CI-MPR) (M6PR) (300 kDa mannose 6-phosphate receptor) (MPR 300) (Insulin-like growth factor 2 receptor) (Insulin-like growth factor II receptor) (IGF-II receptor) (M6P/IGF2 receptor) (M6P/IGF2R) (CD antigen CD222)	IGF2R MPRI																					Reverse	Class I	lVSFHDDsDEDLLHI	1	N-Term(Dimethyl:2H(4)); S8(Phospho)	76	ETD	27	0	1866.85	3	622.954	1.44	142.67	9785	20110105_LM_HJ_Epac_Rev_007_F27_2.raw
SESLIDASEDpSQLEAAIR	1	S(1): 0.0; S(3): 0.0; S(8): 0.0; S(11): 100.0	481	O94888	UBX domain-containing protein 7 OS=Homo sapiens GN=UBXD7 PE=1 SV=2 - [UBXD7_HUMAN]	1	O94888	S288	UBX domain-containing protein 7	UBXN7 KIAA0794 UBXD7																					Forward	Class I	sESLIDASEDsQLEAAIR	1	N-Term(Dimethyl:2H(4)); S11(Phospho)	110	ETD	14	0	2045.96	3	682.657	-0.39	141.05	10357	OR5_101221_LM_HJ_Epac1_007_SCX_Phospho_F14.raw
TLLSESSSQSSKpSPSLSSK	1	T(1): 0.0; S(4): 0.0; S(6): 0.0; S(7): 0.0; S(8): 0.0; S(10): 0.0; S(11): 0.0; S(13): 100.0; S(15): 0.0; S(17): 0.0; S(18): 0.0	481	Q9UPU5	Ubiquitin carboxyl-terminal hydrolase 24 OS=Homo sapiens GN=USP24 PE=1 SV=2 - [UBP24_HUMAN]	1	Q9UPU5	S391	Ubiquitin carboxyl-terminal hydrolase 24 (EC 3.4.19.12) (Deubiquitinating enzyme 24) (Ubiquitin thioesterase 24) (Ubiquitin-specific-processing protease 24)	USP24 KIAA1057																					Forward	Class I	tLLSESSSQSSksPSLSSk	1	N-Term(Dimethyl:2H(4)); K12(Dimethyl:2H(4)); S13(Phospho); K19(Dimethyl:2H(4))	110	ETD	27	1	2116.12	3	706.044	0.26	73.56	4837	OR5_101221_LM_HJ_Epac1_007_SCX_Phospho_F27.raw
ASLGpSLEGEAEAEASSPK	1	S(2): 0.0; S(5): 100.0; S(15): 0.0; S(16): 0.0	480	Q09666	Neuroblast differentiation-associated protein AHNAK OS=Homo sapiens GN=AHNAK PE=1 SV=2 - [AHNK_HUMAN]	1	Q09666	S5752	Neuroblast differentiation-associated protein AHNAK (Desmoyokin)	AHNAK PM227																					Forward	Class I	aSLGsLEGEAEAEASSPk	1	N-Term(Dimethyl); S5(Phospho); K18(Dimethyl)	97	ETD	12	0	1868.85	3	623.623	0.77	140.68	10864	OR5_101221_LM_HJ_Epac1_007_SCX_Phospho_F12.raw
LESLYpSDEEDESAVGADK	1	S(3): 0.0; Y(5): 0.0; S(6): 100.0; S(12): 0.0	480	Q9UP95	Solute carrier family 12 member 4 OS=Homo sapiens GN=SLC12A4 PE=1 SV=2 - [S12A4_HUMAN]	1	Q9UP95	S967	Solute carrier family 12 member 4 (Electroneutral potassium-chloride cotransporter 1) (Erythroid K-Cl cotransporter 1) (hKCC1)	SLC12A4 KCC1																					Forward	Class I	lESLYsDEEDESAVGADk	1	N-Term(Dimethyl); S6(Phospho); K18(Dimethyl)	106	ETD	13	0	2092.89	3	698.3	0.18	118.01	8315	OR5_101221_LM_HJ_Epac1_007_SCX_Phospho_F13.raw
GFGDGYNGYGGGPGGGNFGGpSPGYGGGR	1	Y(6): 0.0; Y(9): 0.0; S(21): 100.0; Y(24): 0.0	479	P22626	Heterogeneous nuclear ribonucleoproteins A2/B1 OS=Homo sapiens GN=HNRNPA2B1 PE=1 SV=2 - [ROA2_HUMAN]	1	P22626	S259	Heterogeneous nuclear ribonucleoproteins A2/B1 (hnRNP A2/B1)	HNRNPA2B1 HNRPA2B1																					Forward	Class I	gFGDGYNGYGGGPGGGNFGGsPGYGGGR	1	N-Term(Dimethyl:2H(4)); S21(Phospho)	109	HCD	14	0	2607.06	3	869.691	-1.4	123.65	9015	OR5_101221_LM_HJ_Epac1_007_SCX_Phospho_F14.raw
RNpSSEASSGDFLDLK	1	S(3): 100.0; S(4): 0.0; S(7): 0.0; S(8): 0.0	478	Q9UK76	Hematological and neurological expressed 1 protein OS=Homo sapiens GN=HN1 PE=1 SV=3 - [HN1_HUMAN]	1	Q9UK76	S87	Hematological and neurological expressed 1 protein (Androgen-regulated protein 2)	HN1 ARM2																					Reverse	Class I	rNsSEASSGDFLDLk	1	N-Term(Dimethyl); S3(Phospho); K15(Dimethyl)	106	ETD	28	1	1761.79	3	587.935	-8.27	118.83	7759	20110105_LM_HJ_Epac_Rev_007_F28.raw
ENNVSQPASSSSSSSSSNNGSApSPTK	1	S(5): 0.0; S(9): 0.0; S(10): 0.0; S(11): 0.0; S(12): 0.0; S(13): 0.0; S(14): 0.0; S(15): 0.0; S(16): 0.0; S(17): 0.0; S(21): 0.0; S(23): 100.0; T(25): 0.0	477	Q02446	Transcription factor Sp4 OS=Homo sapiens GN=SP4 PE=1 SV=1 - [SP4_HUMAN]	1	Q02446	S136	Transcription factor Sp4 (SPR-1)	SP4																					Reverse	Class I	eNNVSQPASSSSSSSSSNNGSAsPTk	1	N-Term(Dimethyl); S23(Phospho); K26(Dimethyl)	116	HCD	14	0	2634.11	3	878.709	-1.29	31.16	2328	20110114_LM_HJ_Epac_Rev_007_F14.raw
QVAEQGGDLpSPAANR	1	S(10): 100.0	477	O94804	Serine/threonine-protein kinase 10 OS=Homo sapiens GN=STK10 PE=1 SV=1 - [STK10_HUMAN]	1	O94804	S438	Serine/threonine-protein kinase 10 (EC 2.7.11.1) (Lymphocyte-oriented kinase)	STK10 LOK																					Forward	Class I	qVAEQGGDLsPAANR	1	N-Term(Dimethyl); S10(Phospho)	95	ETD	14	0	1620.74	3	540.917	0.04	53.82	4446	OR5_101215_LM_HJ_Epac1_007_SCX_Phospho_F14.raw
QLEYQQLEDDKLpSQK	1	Y(4): 0.0; S(13): 100.0	472	Q9Y2J2	Band 4.1-like protein 3 OS=Homo sapiens GN=EPB41L3 PE=1 SV=2 - [E41L3_HUMAN]	1	Q9Y2J2	S88	Band 4.1-like protein 3 (4.1B) (Differentially expressed in adenocarcinoma of the lung protein 1) (DAL-1)	EPB41L3 DAL1 KIAA0987																					Forward	Class I	qLEYQQLEDDkLsQk	1	N-Term(Dimethyl); K11(Dimethyl); S13(Phospho); K15(Dimethyl)	90	ETD	27	1	2028.99	3	677.001	0.15	108.31	7041	OR5_101221_LM_HJ_Epac1_007_SCX_Phospho_F27.raw
SLGKDGpSLEDDEDEEDDLDEGVGGK	1	S(1): 0.0; S(7): 100.0	472	Q12789	General transcription factor 3C polypeptide 1 OS=Homo sapiens GN=GTF3C1 PE=1 SV=3 - [TF3C1_HUMAN]	1	Q12789	S1611	General transcription factor 3C polypeptide 1 (TF3C-alpha) (TFIIIC box B-binding subunit) (Transcription factor IIIC 220 kDa subunit) (TFIIIC 220 kDa subunit) (TFIIIC220) (Transcription factor IIIC subunit alpha)	GTF3C1																					Reverse	Class I	sLGkDGsLEDDEDEEDDLDEGVGGk	1	N-Term(Dimethyl); K4(Dimethyl); S7(Phospho); K25(Dimethyl)	112	HCD	26	1	2787.16	3	929.726	0.9	104.01	7227	20110105_LM_HJ_Epac_Rev_007_F26.raw
KQpSLGELIGTLNAAK	1	S(3): 100.0; T(10): 0.0	471	P60174	Triosephosphate isomerase OS=Homo sapiens GN=TPI1 PE=1 SV=2 - [TPIS_HUMAN]	1	P60174	S21	Triosephosphate isomerase (TIM) (EC 5.3.1.1) (Triose-phosphate isomerase)	TPI1 TPI																					Forward	Class I	kQsLGELIGTLNAAk	1	N-Term(Dimethyl); K1(Dimethyl); S3(Phospho); K15(Dimethyl)	99	ETD	28	1	1706.95	3	569.654	1.25	141	10059	OR5_101217_LM_HJ_Epac1_007_SCX_Phospho_F28.raw
AASDGQYENQpSPEATSPR	1	S(3): 0.0; Y(7): 0.0; S(11): 100.0; T(15): 0.0; S(16): 0.0	471	Q9HBL0	Tensin-1 OS=Homo sapiens GN=TNS1 PE=1 SV=1 - [TENS1_HUMAN]	1	Q9HBL0	S907	Tensin-1	TNS1 TNS																					Forward	Class I	aASDGQYENQsPEATSPR	1	N-Term(Dimethyl:2H(4)); S11(Phospho)	92	ETD	14	0	2019.86	3	673.958	-0.06	43.85	3133	OR5_101221_LM_HJ_Epac1_007_SCX_Phospho_F14.raw
SLpSTSGESLYHVLGLDK	1	S(1): 0.0; S(3): 100.0; T(4): 0.0; S(5): 0.0; S(8): 0.0; Y(10): 0.0	471	Q9H3Z4	DnaJ homolog subfamily C member 5 OS=Homo sapiens GN=DNAJC5 PE=1 SV=1 - [DNJC5_HUMAN]	1	Q9H3Z4	S10	DnaJ homolog subfamily C member 5 (Cysteine string protein) (CSP)	DNAJC5 CSP																					Reverse	Class I	sLsTSGESLYHVLGLDk	1	N-Term(Dimethyl); S3(Phospho); K17(Dimethyl)	96	ETD	28	0	1941.97	3	647.996	9.1	146.79	9328	20110105_LM_HJ_Epac_Rev_007_F28.raw
AApSGGAALASPGPGTGSGAPAGSGGK	1	S(3): 100.0; S(10): 0.0; T(15): 0.0; S(17): 0.0; S(23): 0.0	469	Q5U651	Ras-interacting protein 1 OS=Homo sapiens GN=RASIP1 PE=1 SV=1 - [RAIN_HUMAN]	1	Q5U651	S292	Ras-interacting protein 1 (Rain)	RASIP1																					Forward	Class I	aAsGGAALASPGPGTGSGAPAGSGGk	1	N-Term(Dimethyl:2H(4)); S3(Phospho); K26(Dimethyl:2H(4))	140	HCD	13	0	2155.07	2	1078.04	1.96	63.08	4450	OR5_101216_LM_HJ_Epac1_007_SCX_Phospho_F13.raw
ANpSGGVDLDSSGEFASIEK	1	S(3): 100.0; S(10): 0.0; S(11): 0.0; S(16): 0.0	469	Q92766	RAS-responsive element-binding protein 1 OS=Homo sapiens GN=RREB1 PE=1 SV=3 - [RREB1_HUMAN]	1	Q92766	S1167	Ras-responsive element-binding protein 1 (RREB-1) (Finger protein in nuclear bodies) (Raf-responsive zinc finger protein LZ321) (Zinc finger motif enhancer-binding protein 1) (Zep-1)	RREB1 FINB																					Reverse	Class I	aNsGGVDLDSSGEFASIEk	1	N-Term(Dimethyl); S3(Phospho); K19(Dimethyl)	129	HCD	13	0	2018.9	2	1009.95	1.29	133.17	9696	20110105_LM_HJ_Epac_Rev_007_F13.raw
EVDGLLTSEPMGpSPVSSK	1	T(7): 0.0; S(8): 0.0; S(13): 100.0; S(16): 0.0; S(17): 0.0	468	Q8WWM7	Ataxin-2-like protein OS=Homo sapiens GN=ATXN2L PE=1 SV=2 - [ATX2L_HUMAN]	1	Q8WWM7	S594	Ataxin-2-like protein (Ataxin-2 domain protein) (Ataxin-2-related protein)	ATXN2L A2D A2LG A2LP A2RP																					Forward	Class I	eVDGLLTSEPMGsPVSSk	1	N-Term(Dimethyl); S13(Phospho); K18(Dimethyl)	88	ETD	14	0	1968.93	3	656.98	1.35	135.15	11502	OR5_101215_LM_HJ_Epac1_007_SCX_Phospho_F14.raw
QKIDDRDpSDEEGASDR	1	S(8): 100.0; S(14): 0.0	468	Q8TDD1	ATP-dependent RNA helicase DDX54 OS=Homo sapiens GN=DDX54 PE=1 SV=2 - [DDX54_HUMAN]	1	Q8TDD1	S782	ATP-dependent RNA helicase DDX54 (EC 3.6.4.13) (ATP-dependent RNA helicase DP97) (DEAD box RNA helicase 97 kDa) (DEAD box protein 54)	DDX54																					Reverse	Class I	qkIDDRDsDEEGASDR	1	N-Term(Dimethyl); K2(Dimethyl); S8(Phospho)	83	ETD	32	2	1971.83	3	657.949	1.03	29.33	2150	20110105_LM_HJ_Epac_Rev_007_F32_2.raw
GQKpSPGALETPSAAGSQGNTASQGK	1	S(4): 100.0; T(10): 0.0; S(12): 0.0; S(16): 0.0; T(20): 0.0; S(22): 0.0	468	Q9Y2D5	A-kinase anchor protein 2 OS=Homo sapiens GN=AKAP2 PE=1 SV=2 - [AKAP2_HUMAN]	1	Q9Y2D5	S393	A-kinase anchor protein 2 (AKAP-2) (AKAP-KL) (Protein kinase A-anchoring protein 2) (PRKA2)	AKAP2 KIAA0920 PRKA2																					Reverse	Class I	gQksPGALETPSAAGSQGNTASQGk	1	N-Term(Dimethyl); K3(Dimethyl); S4(Phospho); K25(Dimethyl)	108	HCD	27	1	2493.2	2	1247.1	-1.04	49.3	3391	20110105_LM_HJ_Epac_Rev_007_F27.raw
SSGpSPYGGGYGSGGGSGGYGSR	1	S(1): 0.0; S(2): 0.0; S(4): 100.0; Y(6): 0.0; Y(10): 0.0; S(12): 0.0; S(16): 0.0; Y(19): 0.0; S(21): 0.0	468	P51991	Heterogeneous nuclear ribonucleoprotein A3 OS=Homo sapiens GN=HNRNPA3 PE=1 SV=2 - [ROA3_HUMAN]	1	P51991	S358	Heterogeneous nuclear ribonucleoprotein A3 (hnRNP A3)	HNRNPA3 HNRPA3																					Reverse	Class I	sSGsPYGGGYGSGGGSGGYGSR	1	N-Term(Dimethyl:2H(4)); S4(Phospho)	120	HCD	14	0	2022.81	2	1011.91	-0.36	66.81	5399	20110114_LM_HJ_Epac_Rev_007_F14.raw
DNQESpSDAELSSSEYIK	1	S(5): 0.0; S(6): 100.0; S(11): 0.0; S(12): 0.0; S(13): 0.0; Y(15): 0.0	468	Q96JM3	Zinc finger protein 828 OS=Homo sapiens GN=ZNF828 PE=1 SV=2 - [ZN828_HUMAN]	1	Q96JM3	S627	Chromosome alignment-maintaining phosphoprotein 1 (Zinc finger protein 828)	CHAMP1 C13orf8 CAMP KIAA1802 ZNF828																					Forward	Class I	dNQESsDAELSSSEYIk	1	N-Term(Dimethyl); S6(Phospho); K17(Dimethyl)	80	ETD	13	0	2037.86	3	679.957	0.95	101.01	7021	OR5_101216_LM_HJ_Epac1_007_SCX_Phospho_F13.raw
VTQHEpSDNENEIQIQNK	1	T(2): 0.0; S(6): 100.0	465	Q5VZL5	Zinc finger MYM-type protein 4 OS=Homo sapiens GN=ZMYM4 PE=1 SV=1 - [ZMYM4_HUMAN]	1	Q5VZL5	S122	Zinc finger MYM-type protein 4 (Zinc finger protein 262)	ZMYM4 KIAA0425 ZNF262																					Reverse	Class I	vTQHEsDNENEIQIQNk	1	N-Term(Dimethyl:2H(4)); S6(Phospho); K17(Dimethyl:2H(4))	95	ETD	28	0	2170.03	3	724.013	-0.4	57.43	4077	20110105_LM_HJ_Epac_Rev_007_F28.raw
RApSDTSLTQGIVAFR	1	S(3): 100.0; T(5): 0.0; S(6): 0.0; T(8): 0.0	465	Q9H0K1	Serine/threonine-protein kinase SNF1-like kinase 2 OS=Homo sapiens GN=SNF1LK2 PE=1 SV=1 - [SN1L2_HUMAN]	1	Q9H0K1	S587	Serine/threonine-protein kinase SIK2 (EC 2.7.11.1) (Qin-induced kinase) (Salt-inducible kinase 2) (SIK-2) (Serine/threonine-protein kinase SNF1-like kinase 2)	SIK2 KIAA0781 QIK SNF1LK2																					Reverse	Class I	rAsDTSLTQGIVAFR	1	N-Term(Dimethyl); S3(Phospho)	109	ETD	28	1	1729.88	3	577.297	8.2	130.69	8364	20110105_LM_HJ_Epac_Rev_007_F28.raw
DWEDDpSDEDMSNFDR	1	S(6): 100.0; S(11): 0.0	465	Q15185	Prostaglandin E synthase 3 OS=Homo sapiens GN=PTGES3 PE=1 SV=1 - [TEBP_HUMAN]	1	Q15185	S113	Prostaglandin E synthase 3 (EC 5.3.99.3) (Cytosolic prostaglandin E2 synthase) (cPGES) (Hsp90 co-chaperone) (Progesterone receptor complex p23) (Telomerase-binding protein p23)	PTGES3 P23 TEBP																					Reverse	Class I	dWEDDsDEDMSNFDR	1	N-Term(Dimethyl:2H(4)); S6(Phospho)	101	ETD	13	0	1987.68	3	663.232	-1.39	128.82	9398	20110105_LM_HJ_Epac_Rev_007_F13.raw
HQQQLLApSPGSSTVDNK	1	S(8): 100.0; S(11): 0.0; S(12): 0.0; T(13): 0.0	464	Q9C0E2	Exportin-4 OS=Homo sapiens GN=XPO4 PE=1 SV=2 - [XPO4_HUMAN]	1	Q9C0E2	S521	Exportin-4 (Exp4)	XPO4 KIAA1721																					Reverse	Class I	hQQQLLAsPGSSTVDNk	1	N-Term(Dimethyl:2H(4)); S8(Phospho); K17(Dimethyl:2H(4))	114	ETD	29	0	1953.99	3	652	-1.58	67.52	4749	20110105_LM_HJ_Epac_Rev_007_F29_2.raw
ILLVDpSPGMGNADDEQQEEGTSSK	1	S(6): 100.0; T(21): 0.0; S(22): 0.0; S(23): 0.0	464	Q9UKN8	General transcription factor 3C polypeptide 4 OS=Homo sapiens GN=GTF3C4 PE=1 SV=1 - [TF3C4_HUMAN]	1	Q9UKN8	S611	General transcription factor 3C polypeptide 4 (EC 2.3.1.48) (TF3C-delta) (Transcription factor IIIC 90 kDa subunit) (TFIIIC 90 kDa subunit) (TFIIIC90) (Transcription factor IIIC subunit delta)	GTF3C4																					Forward	Class I	iLLVDsPGmGNADDEQQEEGTSSk	1	N-Term(Dimethyl:2H(4)); S6(Phospho); M9(Oxidation); K24(Dimethyl:2H(4))	119	HCD	14	0	2680.21	3	894.076	-0.11	106.67	7863	OR5_101221_LM_HJ_Epac1_007_SCX_Phospho_F14.raw
KHpSLEVTQEEVQR	1	S(3): 100.0; T(7): 0.0	463	O15021	Microtubule-associated serine/threonine-protein kinase 4 OS=Homo sapiens GN=MAST4 PE=1 SV=2 - [MAST4_HUMAN]	1	O15021	S1288	Microtubule-associated serine/threonine-protein kinase 4 (EC 2.7.11.1)	MAST4 KIAA0303																					Forward	Class I	kHsLEVTQEEVQR	1	N-Term(Dimethyl:2H(4)); K1(Dimethyl:2H(4)); S3(Phospho)	102	ETD	33	1	1726.9	3	576.304	-0.15	54.04	3563	OR5_101221_LM_HJ_Epac1_007_SCX_Phospho_F33.raw
AGLESGAEPGDGDpSDTTK	1	S(5): 0.0; S(14): 100.0; T(16): 0.0; T(17): 0.0	462	O60832	H/ACA ribonucleoprotein complex subunit 4 OS=Homo sapiens GN=DKC1 PE=1 SV=3 - [DKC1_HUMAN]	1	O60832	S494	H/ACA ribonucleoprotein complex subunit 4 (EC 5.4.99.-) (CBF5 homolog) (Dyskerin) (Nopp140-associated protein of 57 kDa) (Nucleolar protein NAP57) (Nucleolar protein family A member 4) (snoRNP protein DKC1)	DKC1 NOLA4																					Reverse	Class I	aGLESGAEPGDGDsDTTk	1	N-Term(Dimethyl:2H(4)); S14(Phospho); K18(Dimethyl:2H(4))	106	ETD	13	0	1850.81	3	617.61	0.25	51.92	3710	20110105_LM_HJ_Epac_Rev_007_F13.raw
ENQEPLRpSLEDENK	1	S(8): 100.0	462	P48681	Nestin OS=Homo sapiens GN=NES PE=1 SV=2 - [NEST_HUMAN]	1	P48681	S702	Nestin	NES Nbla00170																					Forward	Class I	eNQEPLRsLEDENk	1	N-Term(Dimethyl); S8(Phospho); K14(Dimethyl)	73	ETD	28	1	1836.84	3	612.951	0.45	87.81	6346	OR5_101217_LM_HJ_Epac1_007_SCX_Phospho_F28.raw
RSLAALDALNpTDDENDEEEYEAWK	1	S(2): 0.0; T(11): 100.0; Y(20): 0.0	462	P55081	Microfibrillar-associated protein 1 OS=Homo sapiens GN=MFAP1 PE=1 SV=2 - [MFAP1_HUMAN]	1	P55081	T267	Microfibrillar-associated protein 1	MFAP1																					Forward	Class I	rSLAALDALNtDDENDEEEYEAWk	1	N-Term(Dimethyl:2H(4)); T11(Phospho); K24(Dimethyl:2H(4))	103	HCD	28	1	2941.32	3	981.113	0.17	139.79	9527	OR5_101221_LM_HJ_Epac1_007_SCX_Phospho_F28.raw
KGTENGVNGTLTSNVADpSPR	1	T(3): 0.0; T(10): 0.0; T(12): 0.0; S(13): 0.0; S(18): 100.0	461	Q15629	Translocation-associated membrane protein 1 OS=Homo sapiens GN=TRAM1 PE=1 SV=3 - [TRAM1_HUMAN]	1	Q15629	S365	Translocating chain-associated membrane protein 1	TRAM1 TRAM																					Reverse	Class I	kGTENGVNGTLTSNVADsPR	1	N-Term(Dimethyl); K1(Dimethyl); S18(Phospho)	106	ETD	29	1	2153.02	3	718.345	-1.12	61.56	4377	20110105_LM_HJ_Epac_Rev_007_F29_2.raw
AADpSDDGAVSAPAASDGGVSK	1	S(4): 100.0; S(10): 0.0; S(15): 0.0; S(20): 0.0	460	Q96GM8	Target of EGR1 protein 1 OS=Homo sapiens GN=TOE1 PE=1 SV=1 - [TOE1_HUMAN]	1	Q96GM8	S5	Target of EGR1 protein 1	TOE1																					Forward	Class I	aADsDDGAVSAPAASDGGVSk	1	N-Term(Dimethyl); S4(Phospho); K21(Dimethyl)	118	ETD	12	0	1983.86	3	661.957	0.43	58.14	4418	OR5_101221_LM_HJ_Epac1_007_SCX_Phospho_F12.raw
ESDQTLAALLpSPKESSGGEK	1	S(2): 0.0; T(5): 0.0; S(11): 100.0; S(15): 0.0; S(16): 0.0	460	P18583	SON protein OS=Homo sapiens GN=SON PE=1 SV=3 - [SON_HUMAN]	1	P18583	S1697	Protein SON (Bax antagonist selected in saccharomyces 1) (BASS1) (Negative regulatory element-binding protein) (NRE-binding protein) (Protein DBP-5) (SON3)	SON C21orf50 DBP5 KIAA1019 NREBP HSPC310 HSPC312																					Forward	Class I	eSDQTLAALLsPkESSGGEk	1	N-Term(Dimethyl); S11(Phospho); K13(Dimethyl); K20(Dimethyl)	114	ETD	27	1	2211.08	3	737.697	-0.68	134.14	8699	OR5_101221_LM_HJ_Epac1_007_SCX_Phospho_F27.raw
GLLAQGLRPEpSPPPAGPLLNGAPAGESPQPK	1	S(11): 100.0; S(27): 0.0	460	Q96TA1	Niban-like protein 1 OS=Homo sapiens GN=FAM129B PE=1 SV=2 - [NIBL1_HUMAN]	1	Q96TA1	S652	Niban-like protein 1 (Meg-3) (Melanoma invasion by ERK) (MINERVA) (Protein FAM129B)	FAM129B C9orf88																					Reverse	Class I	gLLAQGLRPEsPPPAGPLLNGAPAGESPQPk	1	N-Term(Dimethyl:2H(4)); S11(Phospho); K31(Dimethyl:2H(4))	87	HCD	27	0	3160.7	3	1054.24	0.89	134.98	9182	20110105_LM_HJ_Epac_Rev_007_F27_2.raw
ARTSpSFAEPGGGGGGGGGGPGGSASGPGGTGGGK	1	T(3): 0.5; S(4): 0.5; S(5): 99.1; S(23): 0.0; S(25): 0.0; T(30): 0.0	457	P49840	Glycogen synthase kinase-3 alpha OS=Homo sapiens GN=GSK3A PE=1 SV=2 - [GSK3A_HUMAN]	1	P49840	S21	Glycogen synthase kinase-3 alpha (GSK-3 alpha) (EC 2.7.11.26) (Serine/threonine-protein kinase GSK3A) (EC 2.7.11.1)	GSK3A																					Forward	Class I	aRTSsFAEPGGGGGGGGGGPGGSASGPGGTGGGk	1	N-Term(Dimethyl:2H(4)); S5(Phospho); K34(Dimethyl:2H(4))	114	HCD	28	1	2804.29	3	935.433	0.64	56.24	4021	OR5_101221_LM_HJ_Epac1_007_SCX_Phospho_F28.raw
ASLQSGQEGAGDpSPGSQFSK	1	S(2): 0.0; S(5): 0.0; S(13): 100.0; S(16): 0.0; S(19): 0.0	457	Q12778	Forkhead box protein O1 OS=Homo sapiens GN=FOXO1 PE=1 SV=2 - [FOXO1_HUMAN]	1	Q12778	S287	Forkhead box protein O1 (Forkhead box protein O1A) (Forkhead in rhabdomyosarcoma)	FOXO1 FKHR FOXO1A																					Forward	Class I	aSLQSGQEGAGDsPGSQFSk	1	N-Term(Dimethyl:2H(4)); S13(Phospho); K20(Dimethyl:2H(4))	89	ETD	14	0	2081.97	3	694.66	1.24	76.37	5654	OR5_101221_LM_HJ_Epac1_007_SCX_Phospho_F14.raw
GDLpSDVEEEEEEEMDVDEATGAVK	1	S(4): 100.0; T(20): 0.0	457	Q96ST3	Paired amphipathic helix protein Sin3a OS=Homo sapiens GN=SIN3A PE=1 SV=2 - [SIN3A_HUMAN]	1	Q96ST3	S832	Paired amphipathic helix protein Sin3a (Histone deacetylase complex subunit Sin3a) (Transcriptional corepressor Sin3a)	SIN3A																					Reverse	Class I	gDLsDVEEEEEEEMDVDEATGAVk	1	N-Term(Dimethyl:2H(4)); S4(Phospho); K24(Dimethyl:2H(4))	81	HCD	11	0	2769.17	3	923.728	1.21	88.96	6744	20110105_LM_HJ_Epac_Rev_007_F11.raw
NLLEDDpSDEEEDFFLR	1	S(7): 100.0	455	O75379	Vesicle-associated membrane protein 4 OS=Homo sapiens GN=VAMP4 PE=1 SV=2 - [VAMP4_HUMAN]	1	O75379	S30	Vesicle-associated membrane protein 4 (VAMP-4)	VAMP4																					Reverse	Class I	nLLEDDsDEEEDFFLR	1	N-Term(Dimethyl:2H(4)); S7(Phospho)	81	ETD	13	0	2097.88	3	699.966	0.48	150.67	11021	20110105_LM_HJ_Epac_Rev_007_F13.raw
EALHTAGYEMSLNGpSPR	1	T(5): 0.0; Y(8): 0.0; S(11): 0.0; S(15): 100.0	455	O94929	Actin-binding LIM protein 3 OS=Homo sapiens GN=ABLIM3 PE=1 SV=3 - [ABLM3_HUMAN]	1	O94929	S567	Actin-binding LIM protein 3 (abLIM-3) (Actin-binding LIM protein family member 3)	ABLIM3 KIAA0843 HMFN1661																					Reverse	Class I	eALHTAGYEMSLNGsPR	1	N-Term(Dimethyl); S15(Phospho)	107	ETD	29	0	1940.85	3	647.621	-4.12	95.7	5690	20110105_LM_HJ_Epac_Rev_007_F29.raw
AAGALGSASSGpSMPNLAAR	1	S(7): 0.0; S(9): 0.0; S(10): 0.0; S(12): 100.0	455	Q9P2Q2	FERM domain-containing protein 4A OS=Homo sapiens GN=FRMD4A PE=2 SV=3 - [FRM4A_HUMAN]	1	Q9P2Q2	S800	FERM domain-containing protein 4A	FRMD4A FRMD4 KIAA1294																					Forward	Class I	aAGALGSASSGsMPNLAAR	1	N-Term(Dimethyl); S12(Phospho)	128	ETD	14	0	1796.84	3	599.617	0.77	107	7883	OR5_101221_LM_HJ_Epac1_007_SCX_Phospho_F14.raw
ETNLDpSLPLVDTHSK	1	T(2): 0.0; S(6): 100.0; T(12): 0.0; S(14): 0.0	455	P08670	Vimentin OS=Homo sapiens GN=VIM PE=1 SV=4 - [VIME_HUMAN]	1	P08670	S430	Vimentin	VIM																					Reverse	Class I	eTNLDsLPLVDTHSk	1	N-Term(Dimethyl); S6(Phospho); K15(Dimethyl)	99	ETD	28	0	1804.87	3	602.294	-2.2	130.72	8500	20110105_LM_HJ_Epac_Rev_007_F28_2.raw
RSLAESGLSWFpSESEEK	1	S(2): 0.0; S(6): 0.0; S(9): 0.0; S(12): 100.0; S(14): 0.0	455	Q8NEY1	Neuron navigator 1 OS=Homo sapiens GN=NAV1 PE=1 SV=2 - [NAV1_HUMAN]	1	Q8NEY1	S474	Neuron navigator 1 (Pore membrane and/or filament-interacting-like protein 3) (Steerin-1) (Unc-53 homolog 1) (unc53H1)	NAV1 KIAA1151 KIAA1213 POMFIL3 STEERIN1																					Forward	Class I	rSLAESGLSWFsESEEk	1	N-Term(Dimethyl:2H(4)); S12(Phospho); K17(Dimethyl:2H(4))	88	ETD	29	1	2086	3	696.005	0.52	142.16	9242	OR5_101221_LM_HJ_Epac1_007_SCX_Phospho_F29.raw
IEVLPVDTGAGGYSGNSGpSPK	1	T(8): 0.0; Y(13): 0.0; S(14): 0.0; S(17): 0.0; S(19): 100.0	455	Q92738	USP6 N-terminal-like protein OS=Homo sapiens GN=USP6NL PE=1 SV=3 - [US6NL_HUMAN]	1	Q92738	S716	USP6 N-terminal-like protein (Related to the N-terminus of tre) (RN-tre)	USP6NL KIAA0019																					Forward	Class I	iEVLPVDTGAGGYSGNSGsPk	1	N-Term(Dimethyl); S19(Phospho); K21(Dimethyl)	105	ETD	14	0	2141.02	3	714.344	1.04	129.52	9434	OR5_101221_LM_HJ_Epac1_007_SCX_Phospho_F14.raw
ETEpSEAEDNLDDLEK	1	T(2): 0.0; S(4): 100.0	455	Q8IYB3	Serine/arginine repetitive matrix protein 1 OS=Homo sapiens GN=SRRM1 PE=1 SV=2 - [SRRM1_HUMAN]	1	Q8IYB3	S874	Serine/arginine repetitive matrix protein 1 (SR-related nuclear matrix protein of 160 kDa) (SRm160) (Ser/Arg-related nuclear matrix protein)	SRRM1 SRM160																					Forward	Class I	eTEsEAEDNLDDLEk	1	N-Term(Dimethyl); S4(Phospho); K15(Dimethyl)	88	ETD	12	0	1872.76	3	624.926	0.11	128.13	9834	OR5_101221_LM_HJ_Epac1_007_SCX_Phospho_F12.raw
IKGSpSPGIQDTLEAEDGAFETDEAPEDR	1	S(4): 0.6; S(5): 99.4; T(11): 0.0; T(21): 0.0	454	Q9UNX4	WD repeat-containing protein 3 OS=Homo sapiens GN=WDR3 PE=1 SV=1 - [WDR3_HUMAN]	1	Q9UNX4	S241	WD repeat-containing protein 3	WDR3																					Reverse	Class I	ikGSsPGIQDTLEAEDGAFETDEAPEDR	1	N-Term(Dimethyl:2H(4)); K2(Dimethyl:2H(4)); S5(Phospho)	87	HCD	27	1	3121.43	3	1041.15	-0.63	138.03	11756	20110114_LM_HJ_Epac_Rev_007_F27.raw
RQGpSFSEDVISHK	1	S(4): 100.0; S(6): 0.0; S(11): 0.0	454	Q9UPN3;Q96PK2	Microtubule-actin cross-linking factor 1, isoforms 1/2/3/5 OS=Homo sapiens GN=MACF1 PE=1 SV=3 - [MACF1_HUMAN]|Microtubule-actin cross-linking factor 1, isoform 4 OS=Homo sapiens GN=MACF1 PE=1 SV=1 - [MACF4_HUMAN]	2	Q9UPN3	S1860	Microtubule-actin cross-linking factor 1, isoforms 1/2/3/5 (620 kDa actin-binding protein) (ABP620) (Actin cross-linking family protein 7) (Macrophin-1) (Trabeculin-alpha)	MACF1 ABP620 ACF7 KIAA0465 KIAA1251	Q96PK2	S2362	Replaced by: Q9UPN3 = Microtubule-actin cross-linking factor 1, isoforms 1/2/3/5 (620 kDa actin-binding protein) (ABP620) (Actin cross-linking family protein 7) (Macrophin-1) (Trabeculin-alpha)	MACF1 ABP620 ACF7 KIAA0465 KIAA1251																	Reverse	Class I	rQGsFSEDVISHk	1	N-Term(Dimethyl); S4(Phospho); K13(Dimethyl)	91	ETD	32	1	1625.77	3	542.594	-0.02	74.35	4411	20110105_LM_HJ_Epac_Rev_007_F32_2.raw
EMLApSDDEEDVSSKVEK	1	S(5): 100.0; S(12): 0.0; S(13): 0.0	454	Q0ZGT2	Nexilin OS=Homo sapiens GN=NEXN PE=1 SV=1 - [NEXN_HUMAN]	1	Q0ZGT2	S80	Nexilin (F-actin-binding protein) (Nelin)	NEXN																					Reverse	Class I	eMLAsDDEEDVSSkVEk	1	N-Term(Dimethyl:2H(4)); S5(Phospho); K14(Dimethyl:2H(4)); K17(Dimethyl:2H(4))	99	ETD	27	1	2086.97	3	696.328	-10.16	87.94	5800	20110105_LM_HJ_Epac_Rev_007_F27.raw
SSpSPAPADIAQTVQEDLR	1	S(1): 0.0; S(2): 0.0; S(3): 100.0; T(12): 0.0	453	Q13283	Ras GTPase-activating protein-binding protein 1 OS=Homo sapiens GN=G3BP1 PE=1 SV=1 - [G3BP1_HUMAN]	1	Q13283	S232	Ras GTPase-activating protein-binding protein 1 (G3BP-1) (EC 3.6.4.12) (EC 3.6.4.13) (ATP-dependent DNA helicase VIII) (hDH VIII) (GAP SH3 domain-binding protein 1)	G3BP1 G3BP																					Reverse	Class I	sSsPAPADIAQTVQEDLR	1	N-Term(Dimethyl:2H(4)); S3(Phospho)	127	HCD	14	0	1996.95	2	998.98	0.54	145.29	12354	20110114_LM_HJ_Epac_Rev_007_F14.raw
LKSSSpSSEDVASSNQK	1	S(3): 0.0; S(4): 0.0; S(5): 0.0; S(6): 100.0; S(7): 0.0; S(12): 0.0; S(13): 0.0	453	P51813	Cytoplasmic tyrosine-protein kinase BMX OS=Homo sapiens GN=BMX PE=1 SV=1 - [BMX_HUMAN]	1	P51813	S254	Cytoplasmic tyrosine-protein kinase BMX (EC 2.7.10.2) (Bone marrow tyrosine kinase gene in chromosome X protein) (Epithelial and endothelial tyrosine kinase) (ETK) (NTK38)	BMX																					Forward	Class I	lkSSSsSEDVASSNQk	1	N-Term(Dimethyl); K2(Dimethyl); S6(Phospho); K16(Dimethyl)	110	ETD	28	1	1817.85	3	606.622	-0.07	29.55	2259	OR5_101221_LM_HJ_Epac1_007_SCX_Phospho_F28.raw
KTpSLDVSNSAEPGFLAPGAR	1	T(2): 0.0; S(3): 100.0; S(7): 0.0; S(9): 0.0	453	Q8NEY1	Neuron navigator 1 OS=Homo sapiens GN=NAV1 PE=1 SV=2 - [NAV1_HUMAN]	1	Q8NEY1	S648	Neuron navigator 1 (Pore membrane and/or filament-interacting-like protein 3) (Steerin-1) (Unc-53 homolog 1) (unc53H1)	NAV1 KIAA1151 KIAA1213 POMFIL3 STEERIN1																					Reverse	Class I	kTsLDVSNSAEPGFLAPGAR	1	N-Term(Dimethyl); K1(Dimethyl); S3(Phospho)	128	ETD	28	1	2153.04	3	718.352	-10.71	116.97	7667	20110105_LM_HJ_Epac_Rev_007_F28.raw
TTQSMQDFPVVDpSEEEAEEEFQK	1	T(1): 0.0; T(2): 0.0; S(4): 0.0; S(13): 100.0	453	Q9UBB9	Tuftelin-interacting protein 11 OS=Homo sapiens GN=TFIP11 PE=1 SV=1 - [TFP11_HUMAN]	1	Q9UBB9	S210	Tuftelin-interacting protein 11 (Septin and tuftelin-interacting protein 1) (STIP-1)	TFIP11 STIP HSPC006																					Forward	Class I	tTQSMQDFPVVDsEEEAEEEFQk	1	N-Term(Dimethyl:2H(4)); S13(Phospho); K23(Dimethyl:2H(4))	78	HCD	13	0	2847.24	3	949.752	0.6	139.45	9846	OR5_101221_LM_HJ_Epac1_007_SCX_Phospho_F13.raw
RGTGQpSDDSDIWDDTALIK	1	T(3): 0.0; S(6): 100.0; S(9): 0.0; T(15): 0.0	452	Q16637	Survival motor neuron protein OS=Homo sapiens GN=SMN1 PE=1 SV=1 - [SMN_HUMAN]	1	Q16637	S28	Survival motor neuron protein (Component of gems 1) (Gemin-1)	SMN1 SMN SMNT; SMN2 SMNC																					Forward	Class I	rGTGQsDDSDIWDDTALIk	1	N-Term(Dimethyl:2H(4)); S6(Phospho); K19(Dimethyl:2H(4))	105	ETD	28	1	2237.06	3	746.358	0.38	140.55	10020	OR5_101217_LM_HJ_Epac1_007_SCX_Phospho_F28.raw
AASGGAALApSPGPGTGSGAPAGSGGK	1	S(3): 0.0; S(10): 100.0; T(15): 0.0; S(17): 0.0; S(23): 0.0	452	Q5U651	Ras-interacting protein 1 OS=Homo sapiens GN=RASIP1 PE=1 SV=1 - [RAIN_HUMAN]	1	Q5U651	S299	Ras-interacting protein 1 (Rain)	RASIP1																					Forward	Class I	aASGGAALAsPGPGTGSGAPAGSGGk	1	N-Term(Dimethyl); S10(Phospho); K26(Dimethyl)	124	ETD	14	0	2147.02	3	716.344	1.55	54.57	3937	OR5_101221_LM_HJ_Epac1_007_SCX_Phospho_F14.raw
LTRYpSQGDDDGSSSSGGSSVAGSQSTLFK	1	T(2): 0.0; Y(4): 0.5; S(5): 99.5; S(12): 0.0; S(13): 0.0; S(14): 0.0; S(15): 0.0; S(18): 0.0; S(19): 0.0; S(23): 0.0; S(25): 0.0; T(26): 0.0	451	Q9UH99	Protein unc-84 homolog B OS=Homo sapiens GN=UNC84B PE=1 SV=3 - [UN84B_HUMAN]	1	Q9UH99	S12	SUN domain-containing protein 2 (Protein unc-84 homolog B) (Rab5-interacting protein) (Rab5IP) (Sad1/unc-84 protein-like 2)	SUN2 FRIGG KIAA0668 RAB5IP UNC84B																					Reverse	Class I	lTRYsQGDDDGSSSSGGSSVAGSQSTLFk	1	N-Term(Dimethyl); S5(Phospho); K29(Dimethyl)	115	HCD	27	1	3017.38	3	1006.47	15.25	121.87	10092	20110114_LM_HJ_Epac_Rev_007_F27_2.raw
GDMpSDEDDENEFFDAPEIITMPENLGHK	1	S(4): 100.0; T(20): 0.0	451	P22059	Oxysterol-binding protein 1 OS=Homo sapiens GN=OSBP PE=1 SV=1 - [OSBP1_HUMAN]	1	P22059	S351	Oxysterol-binding protein 1	OSBP OSBP1																					Reverse	Class I	gDMsDEDDENEFFDAPEIITmPENLGHk	1	N-Term(Dimethyl); S4(Phospho); M21(Oxidation); K28(Dimethyl)	72	HCD	26	0	3347.37	3	1116.46	2.64	146.25	10208	20110105_LM_HJ_Epac_Rev_007_F26.raw
ISVGRLpSPQQESSASSK	1	S(2): 0.0; S(7): 100.0; S(12): 0.0; S(13): 0.0; S(15): 0.0; S(16): 0.0	451	P15822	Zinc finger protein 40 OS=Homo sapiens GN=HIVEP1 PE=1 SV=1 - [ZEP1_HUMAN]	1	P15822	S1734	Zinc finger protein 40 (Cirhin interaction protein) (CIRIP) (Gate keeper of apoptosis-activating protein) (GAAP) (Human immunodeficiency virus type I enhancer-binding protein 1) (HIV-EP1) (Major histocompatibility complex-binding protein 1) (MBP-1) (Positive regulatory domain II-binding factor 1) (PRDII-BF1)	HIVEP1 ZNF40																					Forward	Class I	iSVGRLsPQQESSASSk	1	N-Term(Dimethyl:2H(4)); S7(Phospho); K17(Dimethyl:2H(4))	94	ETD	28	1	1904.99	3	635.669	-0.15	77.85	5643	OR5_101217_LM_HJ_Epac1_007_SCX_Phospho_F28.raw
HGpSGADpSDYENTQSGDPLLGLEGK	2	S(3): 100.0; S(7): 99.6; Y(9): 0.4; T(12): 0.0; S(14): 0.0	450	Q9Y2X7	ARF GTPase-activating protein GIT1 OS=Homo sapiens GN=GIT1 PE=1 SV=2 - [GIT1_HUMAN]	1	Q9Y2X7	S592, S596	ARF GTPase-activating protein GIT1 (ARF GAP GIT1) (Cool-associated and tyrosine-phosphorylated protein 1) (CAT-1) (CAT1) (G protein-coupled receptor kinase-interactor 1) (GRK-interacting protein 1)	GIT1																					Forward	Class I	hGsGADsDYENTQSGDPLLGLEGk	1	N-Term(Dimethyl:2H(4)); S3(Phospho); S7(Phospho); K24(Dimethyl:2H(4))	70	HCD	15	0	2671.14	3	891.052	0.33	149.02	10248	OR5_101215_LM_HJ_Epac1_007_SCX_Phospho_F15.raw
DGGRSpSPGGQDEGGFMAQGK	1	S(5): 0.0; S(6): 100.0	450	P49023	Paxillin OS=Homo sapiens GN=PXN PE=1 SV=2 - [PAXI_HUMAN]	1	P49023	S303	Paxillin	PXN																					Reverse	Class I	dGGRSsPGGQDEGGFmAQGk	1	N-Term(Dimethyl:2H(4)); S6(Phospho); M16(Oxidation); K20(Dimethyl:2H(4))	109	ETD	27	1	2097.91	3	699.976	-0.28	46.6	3193	20110105_LM_HJ_Epac_Rev_007_F27_2.raw
DSGRGDpSVSDSGSDALR	1	S(2): 0.0; S(7): 100.0; S(9): 0.0; S(11): 0.0; S(13): 0.0	450	Q53EL6	Programmed cell death protein 4 OS=Homo sapiens GN=PDCD4 PE=1 SV=1 - [PDCD4_HUMAN]	1	Q53EL6	S76	Programmed cell death protein 4 (Neoplastic transformation inhibitor protein) (Nuclear antigen H731-like) (Protein 197/15a)	PDCD4 H731																					Forward	Class I	dSGRGDsVSDSGSDALR	1	N-Term(Dimethyl); S7(Phospho)	88	ETD	27	1	1788.74	3	596.918	0.12	50.39	3455	OR5_101217_LM_HJ_Epac1_007_SCX_Phospho_F27.raw
SKpSYDEGLDDYREDAK	1	S(1): 0.0; S(3): 100.0; Y(4): 0.0; Y(11): 0.0	450	Q5T5U3	Rho GTPase-activating protein 21 OS=Homo sapiens GN=ARHGAP21 PE=1 SV=1 - [RHG21_HUMAN]	1	Q5T5U3	S880	Rho GTPase-activating protein 21 (Rho GTPase-activating protein 10) (Rho-type GTPase-activating protein 21)	ARHGAP21 ARHGAP10 KIAA1424																					Forward	Class I	sksYDEGLDDYREDAk	1	N-Term(Dimethyl:2H(4)); K2(Dimethyl:2H(4)); S3(Phospho); K16(Dimethyl:2H(4))	89	ETD	31	2	2066.97	3	689.662	0.38	75.6	4767	OR5_101221_LM_HJ_Epac1_007_SCX_Phospho_F31.raw
LKFpSDDEEEEEVVK	1	S(4): 100.0	450	Q5JSZ5	Uncharacterized protein KIAA0515 OS=Homo sapiens GN=KIAA0515 PE=1 SV=1 - [K0515_HUMAN]	1	Q5JSZ5	S388	Protein PRRC2B (HLA-B-associated transcript 2-like 1) (Proline-rich coiled-coil protein 2B)	PRRC2B BAT2L BAT2L1 KIAA0515																					Forward	Class I	lkFsDDEEEEEVVk	1	N-Term(Dimethyl:2H(4)); K2(Dimethyl:2H(4)); S4(Phospho); K14(Dimethyl:2H(4))	95	ETD	27	1	1871.93	3	624.649	0.83	109.97	7260	OR5_101217_LM_HJ_Epac1_007_SCX_Phospho_F27.raw
LTFDSSFpSPNTGKK	1	T(2): 0.0; S(5): 0.0; S(6): 0.0; S(8): 100.0; T(11): 0.0	450	P21796	Voltage-dependent anion-selective channel protein 1 OS=Homo sapiens GN=VDAC1 PE=1 SV=2 - [VDAC1_HUMAN]	1	P21796	S104	Voltage-dependent anion-selective channel protein 1 (VDAC-1) (hVDAC1) (Outer mitochondrial membrane protein porin 1) (Plasmalemmal porin) (Porin 31HL) (Porin 31HM)	VDAC1 VDAC																					Reverse	Class I	lTFDSSFsPNTGkk	1	N-Term(Dimethyl); S8(Phospho); K13(Dimethyl); K14(Dimethyl)	83	ETD	28	1	1692.82	3	564.945	-3.03	112.98	7468	20110105_LM_HJ_Epac_Rev_007_F28.raw
SVGGSGGGpSFGDNLVTR	1	S(1): 0.0; S(5): 0.0; S(9): 100.0; T(16): 0.0	450	P02545	Lamin-A/C OS=Homo sapiens GN=LMNA PE=1 SV=1 - [LMNA_HUMAN]	1	P02545	S636	Prelamin-A/C [Cleaved into: Lamin-A/C (70 kDa lamin) (Renal carcinoma antigen NY-REN-32)]	LMNA LMN1																					Reverse	Class I	sVGGSGGGsFGDNLVTR	1	N-Term(Dimethyl:2H(4)); S9(Phospho)	119	ETD	14	0	1678.77	3	560.263	-0.09	108.25	8258	20110105_LM_HJ_Epac_Rev_007_F14.raw
VEQALSEVASpSLQSSAPK	1	S(6): 0.0; S(10): 0.0; S(11): 100.0; S(14): 0.0; S(15): 0.0	450	Q86TV6	Tetratricopeptide repeat protein 7B OS=Homo sapiens GN=TTC7B PE=1 SV=2 - [TTC7B_HUMAN]	1	Q86TV6	S576	Tetratricopeptide repeat protein 7B (TPR repeat protein 7B) (Tetratricopeptide repeat protein 7-like-1) (TPR repeat protein 7-like-1)	TTC7B TTC7L1																					Reverse	Class I	vEQALSEVASsLQSSAPk	1	N-Term(Dimethyl); S11(Phospho); K18(Dimethyl)	97	ETD	14	0	1966.97	3	656.329	-0.12	117.24	8881	20110105_LM_HJ_Epac_Rev_007_F14.raw
RAADEDWDpSELEDDLLGEDLLSGK	1	S(9): 100.0; S(22): 0.0	450	Q96EV2	RNA-binding protein 33 OS=Homo sapiens GN=RBM33 PE=1 SV=2 - [RBM33_HUMAN]	1	Q96EV2	S41	RNA-binding protein 33 (Proline-rich protein 8) (RNA-binding motif protein 33)	RBM33 PRR8																					Reverse	Class I	rAADEDWDsELEDDLLGEDLLSGk	1	N-Term(Dimethyl); S9(Phospho); K24(Dimethyl)	83	HCD	28	1	2827.26	3	943.092	1.95	151.72	9634	20110105_LM_HJ_Epac_Rev_007_F28.raw
NYQQNYQNpSESGEK	1	Y(2): 0.0; Y(6): 0.0; S(9): 100.0; S(11): 0.0	449	P67809	Nuclease-sensitive element-binding protein 1 OS=Homo sapiens GN=YBX1 PE=1 SV=3 - [YBOX1_HUMAN]	1	P67809	S165	Nuclease-sensitive element-binding protein 1 (CCAAT-binding transcription factor I subunit A) (CBF-A) (DNA-binding protein B) (DBPB) (Enhancer factor I subunit A) (EFI-A) (Y-box transcription factor) (Y-box-binding protein 1) (YB-1)	YBX1 NSEP1 YB1																					Reverse	Class I	nYQQNYQNsESGEk	1	N-Term(Dimethyl:2H(4)); S9(Phospho); K14(Dimethyl:2H(4))	100	ETD	14	0	1832.79	3	611.602	-0.63	42.5	3034	20110105_LM_HJ_Epac_Rev_007_F14.raw
LPSGpSGAApSPTGSAVDIR	2	S(3): 0.0; S(5): 100.0; S(9): 100.0; T(11): 0.0; S(13): 0.0	449	Q09666	Neuroblast differentiation-associated protein AHNAK OS=Homo sapiens GN=AHNAK PE=1 SV=2 - [AHNK_HUMAN]	1	Q09666	S212, S216	Neuroblast differentiation-associated protein AHNAK (Desmoyokin)	AHNAK PM227																					Reverse	Class I	lPSGsGAAsPTGSAVDIR	1	N-Term(Dimethyl); S5(Phospho); S9(Phospho)	110	ETD	7	0	1830.8	3	610.939	-0.46	62.4	4325	20110105_LM_HJ_Epac_Rev_007_F7.raw
LSLEGDHSTPPSApYGSVK	1	S(2): 0.0; S(8): 0.0; T(9): 0.0; S(12): 0.0; Y(14): 100.0; S(16): 0.0	449	P07355;A6NMY6	Annexin A2 OS=Homo sapiens GN=ANXA2 PE=1 SV=2 - [ANXA2_HUMAN]|Putative annexin A2-like protein OS=Homo sapiens GN=ANXA2P2 PE=5 SV=2 - [AXA2L_HUMAN]	2	P07355	Y24	Annexin A2 (Annexin II) (Annexin-2) (Calpactin I heavy chain) (Calpactin-1 heavy chain) (Chromobindin-8) (Lipocortin II) (Placental anticoagulant protein IV) (PAP-IV) (Protein I) (p36)	ANXA2 ANX2 ANX2L4 CAL1H LPC2D	A6NMY6	Y24	Putative annexin A2-like protein (Annexin A2 pseudogene 2) (Lipocortin II pseudogene)	ANXA2P2 ANX2L2 ANX2P2 LPC2B																	Reverse	Class I	lSLEGDHSTPPSAyGSVk	1	N-Term(Dimethyl); Y14(Phospho); K18(Dimethyl)	94	HCD	28	0	1980.96	2	990.983	13.85	105.16	9028	20110114_LM_HJ_Epac_Rev_007_F28_2.raw
RLLEDGEDFNLGDALDSpSNSMQTIQK	1	S(17): 0.0; S(18): 100.0; S(20): 0.0; T(23): 0.0	449	P05783	Keratin, type I cytoskeletal 18 OS=Homo sapiens GN=KRT18 PE=1 SV=2 - [K1C18_HUMAN]	1	P05783	S399	Keratin, type I cytoskeletal 18 (Cell proliferation-inducing gene 46 protein) (Cytokeratin-18) (CK-18) (Keratin-18) (K18)	KRT18 CYK18 PIG46																					Reverse	Class I	rLLEDGEDFNLGDALDSsNSmQTIQk	1	N-Term(Dimethyl:2H(4)); S18(Phospho); M21(Oxidation); K26(Dimethyl:2H(4))	64	HCD	28	1	3056.43	3	1019.48	-2.7	139.43	9044	20110105_LM_HJ_Epac_Rev_007_F28_2.raw
RILEPDDFLDDLDDEDYEEDpTPK	1	Y(17): 0.0; T(21): 100.0	449	Q92785	Zinc finger protein ubi-d4 OS=Homo sapiens GN=DPF2 PE=1 SV=2 - [REQU_HUMAN]	1	Q92785	T176	Zinc finger protein ubi-d4 (Apoptosis response zinc finger protein) (BRG1-associated factor 45D) (BAF45D) (D4, zinc and double PHD fingers family 2) (Protein requiem)	DPF2 BAF45D REQ UBID4																					Reverse	Class I	rILEPDDFLDDLDDEDYEEDtPk	1	N-Term(Dimethyl); T21(Phospho); K23(Dimethyl)	78	HCD	28	1	2933.25	3	978.422	0.64	149.91	9716	20110105_LM_HJ_Epac_Rev_007_F28_2.raw
LGSLSARpSDSEATISR	1	S(3): 0.0; S(5): 0.0; S(8): 100.0; S(10): 0.0; T(13): 0.0; S(15): 0.0	448	Q5SW79	Centrosomal protein of 170 kDa OS=Homo sapiens GN=CEP170 PE=1 SV=1 - [CE170_HUMAN]	1	Q5SW79	S1165	Centrosomal protein of 170 kDa (Cep170) (KARP-1-binding protein) (KARP1-binding protein)	CEP170 FAM68A KAB KIAA0470																					Reverse	Class I	lGSLSARsDSEATISR	1	N-Term(Dimethyl:2H(4)); S8(Phospho)	108	ETD	28	1	1761.86	3	587.96	-2.21	76.67	5311	20110105_LM_HJ_Epac_Rev_007_F28_2.raw
RTpSMGGTQQQFVEGVR	1	T(2): 0.0; S(3): 100.0; T(7): 0.0	448	P35222	Catenin beta-1 OS=Homo sapiens GN=CTNNB1 PE=1 SV=1 - [CTNB1_HUMAN]	1	P35222	S552	Catenin beta-1 (Beta-catenin)	CTNNB1 CTNNB OK/SW-cl.35 PRO2286																					Forward	Class I	rTsmGGTQQQFVEGVR	1	N-Term(Dimethyl:2H(4)); S3(Phospho); M4(Oxidation)	92	ETD	29	1	1908.89	3	636.968	-1.88	77.17	5385	OR5_101221_LM_HJ_Epac1_007_SCX_Phospho_F29.raw
GTGQpSDDpSDIWDDTALIK	2	T(2): 0.0; S(5): 100.0; S(8): 100.0; T(14): 0.0	448	Q16637	Survival motor neuron protein OS=Homo sapiens GN=SMN1 PE=1 SV=1 - [SMN_HUMAN]	1	Q16637	S28, S31	Survival motor neuron protein (Component of gems 1) (Gemin-1)	SMN1 SMN SMNT; SMN2 SMNC																					Reverse	Class I	gTGQsDDsDIWDDTALIk	1	N-Term(Dimethyl:2H(4)); S5(Phospho); S8(Phospho); K18(Dimethyl:2H(4))	90	ETD	6	0	2160.92	3	720.98	0.85	93.91	6813	20110105_LM_HJ_Epac_Rev_007_F6.raw
ASLGSLEGEAEAEASpSPK	1	S(2): 0.0; S(5): 0.0; S(15): 0.0; S(16): 100.0	448	Q09666	Neuroblast differentiation-associated protein AHNAK OS=Homo sapiens GN=AHNAK PE=1 SV=2 - [AHNK_HUMAN]	1	Q09666	S5763	Neuroblast differentiation-associated protein AHNAK (Desmoyokin)	AHNAK PM227																					Forward	Class I	aSLGSLEGEAEAEASsPk	1	N-Term(Dimethyl); S16(Phospho); K18(Dimethyl)	97	ETD	14	0	1868.85	3	623.623	0.68	125.62	9151	OR5_101221_LM_HJ_Epac1_007_SCX_Phospho_F14.raw
EVIDApSDKEGMpSPAK	2	S(6): 100.0; S(12): 100.0	447	Q13523	Serine/threonine-protein kinase PRP4 homolog OS=Homo sapiens GN=PRPF4B PE=1 SV=2 - [PRP4B_HUMAN]	1	Q13523	S87, S93	Serine/threonine-protein kinase PRP4 homolog (EC 2.7.11.1) (PRP4 kinase) (PRP4 pre-mRNA-processing factor 4 homolog)	PRPF4B KIAA0536 PRP4 PRP4H PRP4K																					Forward	Class I	eVIDAsDkEGmsPAk	1	N-Term(Dimethyl); S6(Phospho); K8(Dimethyl); M11(Oxidation); S12(Phospho); K15(Dimethyl)	79	ETD	14	1	1836.77	3	612.93	0.54	51.41	4230	OR5_101215_LM_HJ_Epac1_007_SCX_Phospho_F14.raw
REESPMDVDQPpSPSAQDTQSIASDGTPQGEK	1	S(4): 0.0; S(12): 100.0; S(14): 0.0; T(18): 0.0; S(20): 0.0; S(23): 0.0; T(26): 0.0	447	Q7Z6Z7	E3 ubiquitin-protein ligase HUWE1 OS=Homo sapiens GN=HUWE1 PE=1 SV=3 - [HUWE1_HUMAN]	1	Q7Z6Z7	S3816	E3 ubiquitin-protein ligase HUWE1 (EC 6.3.2.-) (ARF-binding protein 1) (ARF-BP1) (HECT, UBA and WWE domain-containing protein 1) (Homologous to E6AP carboxyl terminus homologous protein 9) (HectH9) (Large structure of UREB1) (LASU1) (Mcl-1 ubiquitin ligase E3) (Mule) (Upstream regulatory element-binding protein 1) (URE-B1) (URE-binding protein 1)	HUWE1 KIAA0312 KIAA1578 UREB1 HSPC272																					Forward	Class I	rEESPmDVDQPsPSAQDTQSIASDGTPQGEk	1	N-Term(Dimethyl); M6(Oxidation); S12(Phospho); K31(Dimethyl)	90	HCD	28	1	3439.49	3	1147.17	1.1	73.47	5332	OR5_101217_LM_HJ_Epac1_007_SCX_Phospho_F28.raw
RApSDGGANIQLHAQQLLK	1	S(3): 100.0	447	Q9Y2K2	Serine/threonine-protein kinase QSK OS=Homo sapiens GN=QSK PE=1 SV=3 - [QSK_HUMAN]	1	Q9Y2K2	S493	Serine/threonine-protein kinase SIK3 (EC 2.7.11.1) (Salt-inducible kinase 3) (SIK-3) (Serine/threonine-protein kinase QSK)	SIK3 KIAA0999 QSK L19																					Reverse	Class I	rAsDGGANIQLHAQQLLk	1	N-Term(Dimethyl); S3(Phospho); K18(Dimethyl)	101	ETD	31	1	2056.07	3	686.028	-0.87	111.26	6445	20110105_LM_HJ_Epac_Rev_007_F31_2.raw
GTGQpSDDSDIWDDTALIK	1	T(2): 0.0; S(5): 100.0; S(8): 0.0; T(14): 0.0	447	Q16637	Survival motor neuron protein OS=Homo sapiens GN=SMN1 PE=1 SV=1 - [SMN_HUMAN]	1	Q16637	S28	Survival motor neuron protein (Component of gems 1) (Gemin-1)	SMN1 SMN SMNT; SMN2 SMNC																					Forward	Class I	gTGQsDDSDIWDDTALIk	1	N-Term(Dimethyl); S5(Phospho); K18(Dimethyl)	90	ETD	13	0	2072.91	3	691.641	1.39	145.9	9985	OR5_101216_LM_HJ_Epac1_007_SCX_Phospho_F13.raw
LDSDRVSpSASSTAER	1	S(3): 0.0; S(7): 0.0; S(8): 100.0; S(10): 0.0; S(11): 0.0; T(12): 0.0	446	P55196	Afadin OS=Homo sapiens GN=MLLT4 PE=1 SV=2 - [AFAD_HUMAN]	1	P55196	S546	Afadin (ALL1-fused gene from chromosome 6 protein) (Protein AF-6)	MLLT4 AF6																					Forward	Class I	lDSDRVSsASSTAER	1	N-Term(Dimethyl); S8(Phospho)	106	ETD	28	1	1688.75	3	563.587	-0.99	41.15	3004	OR5_101217_LM_HJ_Epac1_007_SCX_Phospho_F28.raw
GYNHGQGSYSYSNSYNpSPGGGGGSDYNYESK	1	Y(2): 0.0; S(8): 0.0; Y(9): 0.0; S(10): 0.0; Y(11): 0.0; S(12): 0.0; S(14): 0.0; Y(15): 0.0; S(17): 100.0; S(24): 0.0; Y(26): 0.0; Y(28): 0.0; S(30): 0.0	446	Q12906	Interleukin enhancer-binding factor 3 OS=Homo sapiens GN=ILF3 PE=1 SV=3 - [ILF3_HUMAN]	1	Q12906	S792	Interleukin enhancer-binding factor 3 (Double-stranded RNA-binding protein 76) (DRBP76) (M-phase phosphoprotein 4) (MPP4) (Nuclear factor associated with dsRNA) (NFAR) (Nuclear factor of activated T-cells 90 kDa) (NF-AT-90) (Translational control protein 80) (TCP80)	ILF3 DRBF MPHOSPH4 NF90																					Reverse	Class I	gYNHGQGSYSYSNSYNsPGGGGGSDYNYESk	1	N-Term(Dimethyl:2H(4)); S17(Phospho); K31(Dimethyl:2H(4))	102	HCD	30	0	3397.38	3	1133.13	0.25	89.55	7330	20110114_LM_HJ_Epac_Rev_007_F30.raw
VEEESTGDPFGFDpSDDESLPVSSK	1	S(5): 0.0; T(6): 0.0; S(14): 100.0; S(18): 0.0; S(22): 0.0; S(23): 0.0	445	Q7Z5K2	Wings apart-like protein homolog OS=Homo sapiens GN=WAPAL PE=1 SV=1 - [WAPL_HUMAN]	1	Q7Z5K2	S77	Wings apart-like protein homolog (Friend of EBNA2 protein)	WAPAL FOE KIAA0261 WAPL																					Forward	Class I	vEEESTGDPFGFDsDDESLPVSSk	1	N-Term(Dimethyl:2H(4)); S14(Phospho); K24(Dimethyl:2H(4))	71	HCD	13	0	2717.19	3	906.401	1.56	141.56	10000	OR5_101221_LM_HJ_Epac1_007_SCX_Phospho_F13.raw
SQSSHpSYDDSTLPLIDR	1	S(1): 0.0; S(3): 0.0; S(4): 0.0; S(6): 100.0; Y(7): 0.0; S(10): 0.0; T(11): 0.0	445	O60716	Catenin delta-1 OS=Homo sapiens GN=CTNND1 PE=1 SV=1 - [CTND1_HUMAN]	1	O60716	S864	Catenin delta-1 (Cadherin-associated Src substrate) (CAS) (p120 catenin) (p120(ctn)) (p120(cas))	CTNND1 KIAA0384																					Reverse	Class I	sQSSHsYDDSTLPLIDR	1	N-Term(Dimethyl); S6(Phospho)	73	ETD	28	0	2028.92	3	676.979	15.11	113.67	7496	20110105_LM_HJ_Epac_Rev_007_F28.raw
KPATPAEDDEDDDIDLFGpSDNEEEDK	1	T(4): 0.0; S(19): 100.0	445	P29692	Elongation factor 1-delta OS=Homo sapiens GN=EEF1D PE=1 SV=5 - [EF1D_HUMAN]	1	P29692	S162	Elongation factor 1-delta (EF-1-delta) (Antigen NY-CO-4)	EEF1D EF1D																					Forward	Class I	kPATPAEDDEDDDIDLFGsDNEEEDk	1	N-Term(Dimethyl:2H(4)); K1(Dimethyl:2H(4)); S19(Phospho); K26(Dimethyl:2H(4))	68	HCD	28	0	3085.34	3	1029.12	1.38	131.26	9302	OR5_101217_LM_HJ_Epac1_007_SCX_Phospho_F28.raw
EELMSpSDLEETAGSTSIPK	1	S(5): 0.0; S(6): 100.0; T(11): 0.0; S(14): 0.0; T(15): 0.0; S(16): 0.0	445	O00567	Nucleolar protein 5A OS=Homo sapiens GN=NOL5A PE=1 SV=4 - [NOL5A_HUMAN]	1	O00567	S520	Nucleolar protein 56 (Nucleolar protein 5A)	NOP56 NOL5A																					Reverse	Class I	eELMSsDLEETAGSTSIPk	1	N-Term(Dimethyl:2H(4)); S6(Phospho); K19(Dimethyl:2H(4))	94	ETD	13	0	2168.02	3	723.343	-0.5	133.62	9725	20110105_LM_HJ_Epac_Rev_007_F13.raw
TIGGGDDpSFNTFFSETGAGK	1	T(1): 0.0; S(8): 100.0; T(11): 0.0; S(14): 0.0; T(16): 0.0	444	Q71U36;Q9BQE3;P68363	Tubulin alpha-1A chain OS=Homo sapiens GN=TUBA1A PE=1 SV=1 - [TBA1A_HUMAN]|Tubulin alpha-1C chain OS=Homo sapiens GN=TUBA1C PE=1 SV=1 - [TBA1C_HUMAN]|Tubulin alpha-1B chain OS=Homo sapiens GN=TUBA1B PE=1 SV=1 - [TBA1B_HUMAN]	3	Q71U36	S48	Tubulin alpha-1A chain (Alpha-tubulin 3) (Tubulin B-alpha-1) (Tubulin alpha-3 chain)	TUBA1A TUBA3	Q9BQE3		Tubulin alpha-1C chain (Alpha-tubulin 6) (Tubulin alpha-6 chain)	TUBA1C TUBA6	P68363	S48	Tubulin alpha-1B chain (Alpha-tubulin ubiquitous) (Tubulin K-alpha-1) (Tubulin alpha-ubiquitous chain)	TUBA1B													Forward	Class I	tIGGGDDsFNTFFSETGAGk	1	N-Term(Dimethyl); S8(Phospho); K20(Dimethyl)	114	ETD	14	0	2143.92	3	715.312	0.41	153.8	12998	OR5_101215_LM_HJ_Epac1_007_SCX_Phospho_F14.raw
LNRSDpSDSSTLAKK	1	S(4): 0.0; S(6): 100.0; S(8): 0.0; S(9): 0.0; T(10): 0.0	444	Q6AWC2	Protein WWC2 OS=Homo sapiens GN=WWC2 PE=1 SV=2 - [WWC2_HUMAN]	1	Q6AWC2	S1022	Protein WWC2 (BH-3-only member B) (WW domain-containing protein 2)	WWC2 BOMB																					Reverse	Class I	lNRSDsDSSTLAkk	1	N-Term(Dimethyl); S6(Phospho); K13(Dimethyl); K14(Dimethyl)	110	ETD	32	2	1685.85	3	562.62	-0.94	30.75	2224	20110105_LM_HJ_Epac_Rev_007_F32.raw
SQSSHSYDDSpTLPLIDR	1	S(1): 0.0; S(3): 0.0; S(4): 0.0; S(6): 0.0; Y(7): 0.0; S(10): 0.0; T(11): 100.0	444	O60716	Catenin delta-1 OS=Homo sapiens GN=CTNND1 PE=1 SV=1 - [CTND1_HUMAN]	1	O60716	T869	Catenin delta-1 (Cadherin-associated Src substrate) (CAS) (p120 catenin) (p120(ctn)) (p120(cas))	CTNND1 KIAA0384																					Reverse	Class I	sQSSHSYDDStLPLIDR	1	N-Term(Dimethyl); T11(Phospho)	72	ETD	29	0	2028.92	3	676.977	12.77	105.94	6238	20110105_LM_HJ_Epac_Rev_007_F29.raw
SHSESASPSALSSpSPNNLSPTGWSQPK	1	S(1): 0.0; S(3): 0.0; S(5): 0.0; S(7): 0.0; S(9): 0.0; S(12): 0.0; S(13): 0.6; S(14): 99.4; S(19): 0.0; T(21): 0.0; S(24): 0.0	444	P04049	RAF proto-oncogene serine/threonine-protein kinase OS=Homo sapiens GN=RAF1 PE=1 SV=1 - [RAF1_HUMAN]	1	P04049	S296	RAF proto-oncogene serine/threonine-protein kinase (EC 2.7.11.1) (Proto-oncogene c-RAF) (cRaf) (Raf-1)	RAF1 RAF																					Forward	Class I	sHSESASPSALSSsPNNLSPTGWSQPk	1	N-Term(Dimethyl:2H(4)); S14(Phospho); K27(Dimethyl:2H(4))	79	HCD	29	0	2884.36	3	962.124	-0.46	113.74	7540	OR5_101221_LM_HJ_Epac1_007_SCX_Phospho_F29.raw
ERIQQFDDGGpSDEEDIWEEK	1	S(11): 100.0	444	Q5H9R7	SAPS domain family member 3 OS=Homo sapiens GN=SAPS3 PE=1 SV=2 - [SAPS3_HUMAN]	1	Q5H9R7	S617	Serine/threonine-protein phosphatase 6 regulatory subunit 3 (SAPS domain family member 3) (Sporulation-induced transcript 4-associated protein SAPL)	PPP6R3 C11orf23 KIAA1558 PP6R3 SAPL SAPS3																					Forward	Class I	eRIQQFDDGGsDEEDIWEEk	1	N-Term(Dimethyl:2H(4)); S11(Phospho); K20(Dimethyl:2H(4))	91	HCD	29	1	2569.12	3	857.046	0.99	135.29	8793	OR5_101221_LM_HJ_Epac1_007_SCX_Phospho_F29.raw
ANpSFVGTAQYVSPELLTEK	1	S(3): 100.0; T(7): 0.0; Y(10): 0.0; S(12): 0.0; T(17): 0.0	444	Q6A1A2	Putative 3-phosphoinositide-dependent protein kinase 2 OS=Homo sapiens GN=PDPK2 PE=5 SV=1 - [PDPK2_HUMAN]	1	Q6A1A2	S214	Putative 3-phosphoinositide-dependent protein kinase 2 (EC 2.7.11.1)	PDPK2																					Forward	Class I	aNsFVGTAQYVSPELLTEk	1	N-Term(Dimethyl); S3(Phospho); K19(Dimethyl)	92	ETD	13	0	2190.07	3	730.695	-1.02	142.5	9729	OR5_101216_LM_HJ_Epac1_007_SCX_Phospho_F13.raw
AQLGINEDHpSEGDEK	1	S(10): 100.0	443	Q69YQ0	Cytospin-A OS=Homo sapiens GN=SPECC1L PE=1 SV=1 - [CYTSA_HUMAN]	1	Q69YQ0	S220	Cytospin-A (Renal carcinoma antigen NY-REN-22) (Sperm antigen with calponin homology and coiled-coil domains 1-like) (SPECC1-like protein)	SPECC1L CYTSA KIAA0376																					Forward	Class I	aQLGINEDHsEGDEk	1	N-Term(Dimethyl); S10(Phospho); K15(Dimethyl)	90	ETD	27	0	1777.77	3	593.26	0.88	60.77	4037	OR5_101221_LM_HJ_Epac1_007_SCX_Phospho_F27.raw
NKpSNEDQSMGNWQIK	1	S(3): 100.0; S(8): 0.0	443	P02545	Lamin-A/C OS=Homo sapiens GN=LMNA PE=1 SV=1 - [LMNA_HUMAN]	1	P02545	S458	Prelamin-A/C [Cleaved into: Lamin-A/C (70 kDa lamin) (Renal carcinoma antigen NY-REN-32)]	LMNA LMN1																					Forward	Class I	nksNEDQSmGNWQIk	1	N-Term(Dimethyl:2H(4)); K2(Dimethyl:2H(4)); S3(Phospho); M9(Oxidation); K15(Dimethyl:2H(4))	81	ETD	28	1	1970.94	3	657.653	0.39	75.2	5282	OR5_101221_LM_HJ_Epac1_007_SCX_Phospho_F28.raw
NEGpSESAPEGQAQQR	1	S(4): 100.0; S(6): 0.0	442	P67809	Nuclease-sensitive element-binding protein 1 OS=Homo sapiens GN=YBX1 PE=1 SV=3 - [YBOX1_HUMAN]	1	P67809	S174	Nuclease-sensitive element-binding protein 1 (CCAAT-binding transcription factor I subunit A) (CBF-A) (DNA-binding protein B) (DBPB) (Enhancer factor I subunit A) (EFI-A) (Y-box transcription factor) (Y-box-binding protein 1) (YB-1)	YBX1 NSEP1 YB1																					Forward	Class I	nEGsESAPEGQAQQR	1	N-Term(Dimethyl); S4(Phospho)	83	ETD	6	0	1695.7	3	565.904	0.42	28.16	2145	OR5_101217_LM_HJ_Epac1_007_SCX_Phospho_F6.raw
LGAGGGpSPEKSPSAQELK	1	S(7): 100.0; S(11): 0.0; S(13): 0.0	442	Q9UNE7	STIP1 homology and U box-containing protein 1 OS=Homo sapiens GN=STUB1 PE=1 SV=2 - [STUB1_HUMAN]	1	Q9UNE7	S19	E3 ubiquitin-protein ligase CHIP (EC 6.3.2.-) (Antigen NY-CO-7) (CLL-associated antigen KW-8) (Carboxy terminus of Hsp70-interacting protein) (STIP1 homology and U box-containing protein 1)	STUB1 CHIP PP1131																					Reverse	Class I	lGAGGGsPEkSPSAQELk	1	N-Term(Dimethyl:2H(4)); S7(Phospho); K10(Dimethyl:2H(4)); K18(Dimethyl:2H(4))	108	ETD	27	1	1889.02	3	630.344	0.03	62.55	4271	20110105_LM_HJ_Epac_Rev_007_F27_2.raw
HSMGPGGYGDNLGGGQMYpSPR	1	S(2): 0.0; Y(8): 0.0; Y(18): 0.3; S(19): 99.7	442	P40425	Pre-B-cell leukemia transcription factor 2 OS=Homo sapiens GN=PBX2 PE=1 SV=2 - [PBX2_HUMAN]	1	P40425	S395	Pre-B-cell leukemia transcription factor 2 (Homeobox protein PBX2) (Protein G17)	PBX2 G17																					Forward	Class I	hSmGPGGYGDNLGGGQmYsPR	1	N-Term(Dimethyl:2H(4)); M3(Oxidation); M17(Oxidation); S19(Phospho)	64	HCD	29	0	2281.93	3	761.314	-0.9	77.23	5390	OR5_101221_LM_HJ_Epac1_007_SCX_Phospho_F29.raw
LGGLRPEpSPESLTSVSR	1	S(8): 100.0; S(11): 0.0; T(13): 0.0; S(14): 0.0; S(16): 0.0	442	Q9H6F5	Coiled-coil domain-containing protein 86 OS=Homo sapiens GN=CCDC86 PE=1 SV=1 - [CCD86_HUMAN]	1	Q9H6F5	S18	Coiled-coil domain-containing protein 86 (Cytokine-induced protein with coiled-coil domain)	CCDC86 CYCLON																					Reverse	Class I	lGGLRPEsPESLTSVSR	1	N-Term(Dimethyl); S8(Phospho)	84	ETD	28	0	1892.95	3	631.655	0.85	109.27	7250	20110105_LM_HJ_Epac_Rev_007_F28.raw
RILpSDVTHSAVFGVPASK	1	S(4): 100.0; T(7): 0.0; S(9): 0.0; S(17): 0.0	441	Q2M2I8	AP2-associated protein kinase 1 OS=Homo sapiens GN=AAK1 PE=1 SV=2 - [AAK1_HUMAN]	1	Q2M2I8	S637	AP2-associated protein kinase 1 (EC 2.7.11.1) (Adaptor-associated kinase 1)	AAK1 KIAA1048																					Reverse	Class I	rILsDVTHSAVFGVPASk	1	N-Term(Dimethyl); S4(Phospho); K18(Dimethyl)	108	ETD	31	1	2020.06	3	674.026	0.69	137.15	11804	20110114_LM_HJ_Epac_Rev_007_F31.raw
LESTESRSpSFSQHAR	1	S(3): 0.0; T(4): 0.0; S(6): 0.0; S(8): 0.0; S(9): 100.0; S(11): 0.0	441	P02545	Lamin-A/C OS=Homo sapiens GN=LMNA PE=1 SV=1 - [LMNA_HUMAN]	1	P02545	S429	Prelamin-A/C [Cleaved into: Lamin-A/C (70 kDa lamin) (Renal carcinoma antigen NY-REN-32)]	LMNA LMN1																					Reverse	Class I	lESTESRSsFSQHAR	1	N-Term(Dimethyl); S9(Phospho)	94	ETD	32	1	1829.82	3	610.61	-1.03	37.3	2604	20110105_LM_HJ_Epac_Rev_007_F32.raw
RSLpSEEKEDHSDGLAGLK	1	S(2): 0.0; S(4): 100.0; S(11): 0.0	440	Q6P0Q8	Microtubule-associated serine/threonine-protein kinase 2 OS=Homo sapiens GN=MAST2 PE=1 SV=2 - [MAST2_HUMAN]	1	Q6P0Q8	S876	Microtubule-associated serine/threonine-protein kinase 2 (EC 2.7.11.1)	MAST2 KIAA0807 MAST205																					Reverse	Class I	rSLsEEkEDHSDGLAGLk	1	N-Term(Dimethyl); S4(Phospho); K7(Dimethyl); K18(Dimethyl)	112	ETD	37	2	2135.04	3	712.351	-0.42	53.3	3510	20110105_LM_HJ_Epac_Rev_007_F37.raw
TWDDDpSDPESETDPDAQAK	1	T(1): 0.0; S(6): 100.0; S(10): 0.0; T(12): 0.0	440	Q5XUX1	F-box/WD repeat-containing protein 9 OS=Homo sapiens GN=FBXW9 PE=2 SV=2 - [FBXW9_HUMAN]	1	Q5XUX1	S18	F-box/WD repeat-containing protein 9 (F-box and WD-40 domain-containing protein 9)	FBXW9 FBW9																					Reverse	Class I	tWDDDsDPESETDPDAQAk	1	N-Term(Dimethyl:2H(4)); S6(Phospho); K19(Dimethyl:2H(4))	109	HCD	13	0	2265.92	2	1133.46	1.02	82.08	6060	20110105_LM_HJ_Epac_Rev_007_F13.raw
SSSNDpSVDEETAESDTSPVLEK	1	S(1): 0.0; S(2): 0.0; S(3): 0.0; S(6): 100.0; T(11): 0.0; S(14): 0.0; T(16): 0.0; S(17): 0.0	440	Q99590	SFRS2-interacting protein OS=Homo sapiens GN=SFRS2IP PE=1 SV=1 - [SFRIP_HUMAN]	1	Q99590	S90	Protein SCAF11 (CTD-associated SR protein 11) (Renal carcinoma antigen NY-REN-40) (SC35-interacting protein 1) (SR-related and CTD-associated factor 11) (SRSF2-interacting protein) (Serine/arginine-rich splicing factor 2-interacting protein) (Splicing factor, arginine/serine-rich 2-interacting protein) (Splicing regulatory protein 129) (SRrp129)	SCAF11 CASP11 SFRS2IP SIP1 SRSF2IP																					Forward	Class I	sSSNDsVDEETAESDTSPVLEk	1	N-Term(Dimethyl:2H(4)); S6(Phospho); K22(Dimethyl:2H(4))	132	HCD	13	0	2470.08	2	1235.54	-1.07	94.54	6783	OR5_101221_LM_HJ_Epac1_007_SCX_Phospho_F13.raw
VNLEESSGVENpSPAGARPK	1	S(6): 0.0; S(7): 0.0; S(12): 100.0	440	Q8WVM8	Sec1 family domain-containing protein 1 OS=Homo sapiens GN=SCFD1 PE=1 SV=4 - [SCFD1_HUMAN]	1	Q8WVM8	S303	Sec1 family domain-containing protein 1 (SLY1 homolog) (Sly1p) (Syntaxin-binding protein 1-like 2)	SCFD1 C14orf163 KIAA0917 STXBP1L2 FKSG23																					Reverse	Class I	vNLEESSGVENsPAGARPk	1	N-Term(Dimethyl:2H(4)); S12(Phospho); K19(Dimethyl:2H(4))	107	HCD	28	0	2085.05	2	1043.03	1.75	85.7	7236	20110114_LM_HJ_Epac_Rev_007_F28_2.raw
EREDpSGDAEAHAFK	1	S(5): 100.0	439	Q9NPI1	Bromodomain-containing protein 7 OS=Homo sapiens GN=BRD7 PE=1 SV=1 - [BRD7_HUMAN]	1	Q9NPI1	S279	Bromodomain-containing protein 7 (75 kDa bromodomain protein) (Protein CELTIX-1)	BRD7 BP75 CELTIX1																					Forward	Class I	eREDsGDAEAHAFk	1	N-Term(Dimethyl); S5(Phospho); K14(Dimethyl)	84	ETD	32	1	1697.72	3	566.577	-0.13	48.28	3150	OR5_101221_LM_HJ_Epac1_007_SCX_Phospho_F32.raw
YDGEpSDKEQFDDDQK	1	Y(1): 0.0; S(5): 100.0	439	Q08AD1	Calmodulin-regulated spectrin-associated protein 1-like protein 1 OS=Homo sapiens GN=CAMSAP1L1 PE=1 SV=2 - [CA1L1_HUMAN]	1	Q08AD1	S1148	Calmodulin-regulated spectrin-associated protein 2 (Calmodulin-regulated spectrin-associated protein 1-like protein 1)	CAMSAP2 CAMSAP1L1 KIAA1078																					Reverse	Class I	yDGEsDkEQFDDDQk	1	N-Term(Dimethyl); S5(Phospho); K7(Dimethyl); K15(Dimethyl)	91	ETD	27	1	1982.78	3	661.599	-3.62	56.1	3817	20110105_LM_HJ_Epac_Rev_007_F27.raw
SLRpSLEEQDQETLR	1	S(1): 0.0; S(4): 100.0; T(12): 0.0	439	P48681	Nestin OS=Homo sapiens GN=NES PE=1 SV=2 - [NEST_HUMAN]	1	P48681	S746	Nestin	NES Nbla00170																					Forward	Class I	sLRsLEEQDQETLR	1	N-Term(Dimethyl); S4(Phospho)	93	ETD	29	1	1811.85	3	604.623	0.56	112.45	7689	OR5_101217_LM_HJ_Epac1_007_SCX_Phospho_F29.raw
KQSFDDNDpSEELEDK	1	S(3): 0.0; S(9): 100.0	438	O60841	Eukaryotic translation initiation factor 5B OS=Homo sapiens GN=EIF5B PE=1 SV=3 - [IF2P_HUMAN]	1	O60841	S113	Eukaryotic translation initiation factor 5B (eIF-5B) (Translation initiation factor IF-2)	EIF5B IF2 KIAA0741																					Forward	Class I	kQSFDDNDsEELEDk	1	N-Term(Dimethyl); K1(Dimethyl); S9(Phospho); K15(Dimethyl)	87	ETD	29	1	1962.82	3	654.946	1.53	70.14	4977	OR5_101221_LM_HJ_Epac1_007_SCX_Phospho_F29.raw
EVLDEDpTDEEKETLK	1	T(7): 100.0; T(13): 0.0	438	Q9Y3P9	Rab GTPase-activating protein 1 OS=Homo sapiens GN=RABGAP1 PE=1 SV=3 - [RBGP1_HUMAN]	1	Q9Y3P9	T996	Rab GTPase-activating protein 1 (GAP and centrosome-associated protein) (Rab6 GTPase-activating protein GAPCenA)	RABGAP1 HSPC094																					Forward	Class I	eVLDEDtDEEkETLk	1	N-Term(Dimethyl); T7(Phospho); K11(Dimethyl); K15(Dimethyl)	87	ETD	27	1	1956.9	3	652.97	1.37	83.94	5604	OR5_101217_LM_HJ_Epac1_007_SCX_Phospho_F27.raw
STpSFRGGMGSGGLATGIAGGLAGMGGIQNEK	1	S(1): 0.9; T(2): 0.9; S(3): 97.4; S(10): 0.9; T(15): 0.0	438	P05783	Keratin, type I cytoskeletal 18 OS=Homo sapiens GN=KRT18 PE=1 SV=2 - [K1C18_HUMAN]	1	P05783	S53	Keratin, type I cytoskeletal 18 (Cell proliferation-inducing gene 46 protein) (Cytokeratin-18) (CK-18) (Keratin-18) (K18)	KRT18 CYK18 PIG46																					Forward	Class I	sTsFRGGMGSGGLATGIAGGLAGMGGIQNEk	2	N-Term(Dimethyl:2H(4)); S3(Phospho); K31(Dimethyl:2H(4))	73	HCD	27	1	2983.46	3	995.158	-0.42	142.04	9362	OR5_101217_LM_HJ_Epac1_007_SCX_Phospho_F27.raw
GKGGVTGpSPEASISGSKGDLK	1	T(6): 0.0; S(8): 100.0; S(12): 0.0; S(14): 0.0; S(16): 0.0	437	Q09666	Neuroblast differentiation-associated protein AHNAK OS=Homo sapiens GN=AHNAK PE=1 SV=2 - [AHNK_HUMAN]	1	Q09666	S5731	Neuroblast differentiation-associated protein AHNAK (Desmoyokin)	AHNAK PM227																					Forward	Class I	gkGGVTGsPEASISGSkGDLk	1	N-Term(Dimethyl); K2(Dimethyl); S8(Phospho); K17(Dimethyl); K21(Dimethyl)	98	ETD	31	2	2124.1	3	708.705	2.63	64.78	4192	OR5_101221_LM_HJ_Epac1_007_SCX_Phospho_F31.raw
RDpSLGAYASQDANEQGQDLGK	1	S(3): 100.0; Y(7): 0.0; S(9): 0.0	437	Q9C0C2	182 kDa tankyrase 1-binding protein OS=Homo sapiens GN=TNKS1BP1 PE=1 SV=3 - [TB182_HUMAN]	1	Q9C0C2	S893	182 kDa tankyrase-1-binding protein	TNKS1BP1 KIAA1741 TAB182																					Forward	Class I	rDsLGAYASQDANEQGQDLGk	1	N-Term(Dimethyl:2H(4)); S3(Phospho); K21(Dimethyl:2H(4))	77	HCD	27	1	2367.1	3	789.706	-1.21	88.42	5877	OR5_101217_LM_HJ_Epac1_007_SCX_Phospho_F27.raw
VDDDpSLGEFPVTNSR	1	S(5): 100.0; T(12): 0.0; S(14): 0.0	437	Q92785	Zinc finger protein ubi-d4 OS=Homo sapiens GN=DPF2 PE=1 SV=2 - [REQU_HUMAN]	1	Q92785	S142	Zinc finger protein ubi-d4 (Apoptosis response zinc finger protein) (BRG1-associated factor 45D) (BAF45D) (D4, zinc and double PHD fingers family 2) (Protein requiem)	DPF2 BAF45D REQ UBID4																					Forward	Class I	vDDDsLGEFPVTNSR	1	N-Term(Dimethyl); S5(Phospho)	100	ETD	14	0	1758.76	3	586.925	0.79	120.69	8819	OR5_101221_LM_HJ_Epac1_007_SCX_Phospho_F14.raw
ASLLpTDEEDVDMALDQR	1	S(2): 0.0; T(5): 100.0	436	P52948	Nuclear pore complex protein Nup98-Nup96 OS=Homo sapiens GN=NUP98 PE=1 SV=3 - [NUP98_HUMAN]	1	P52948	T1000	Nuclear pore complex protein Nup98-Nup96 [Cleaved into: Nuclear pore complex protein Nup98 (98 kDa nucleoporin) (Nucleoporin Nup98); Nuclear pore complex protein Nup96 (96 kDa nucleoporin) (Nucleoporin Nup96)]	NUP98 ADAR2																					Forward	Class I	aSLLtDEEDVDMALDQR	1	N-Term(Dimethyl:2H(4)); T5(Phospho)	101	ETD	13	0	2032.91	3	678.308	0.42	151.31	10340	OR5_101216_LM_HJ_Epac1_007_SCX_Phospho_F13.raw
YMAENPTAGVVQEEEEDNLEYDpSDGNPIAPTK	1	Y(1): 0.0; T(7): 0.0; Y(21): 0.0; S(23): 100.0; T(31): 0.0	436	Q86XP3	ATP-dependent RNA helicase DDX42 OS=Homo sapiens GN=DDX42 PE=1 SV=1 - [DDX42_HUMAN]	1	Q86XP3	S185	ATP-dependent RNA helicase DDX42 (EC 3.6.4.13) (DEAD box protein 42) (RNA helicase-like protein) (RHELP) (RNA helicase-related protein) (RNAHP) (SF3b DEAD box protein) (Splicing factor 3B-associated 125 kDa protein) (SF3b125)	DDX42																					Forward	Class I	yMAENPTAGVVQEEEEDNLEYDsDGNPIAPTk	1	N-Term(Dimethyl); S23(Phospho); K32(Dimethyl)	81	HCD	14	0	3661.58	3	1221.2	0.88	142.42	12092	OR5_101215_LM_HJ_Epac1_007_SCX_Phospho_F14.raw
KASLQSGQEGAGDpSPGSQFSK	1	S(3): 0.0; S(6): 0.0; S(14): 100.0; S(17): 0.0; S(20): 0.0	436	Q12778	Forkhead box protein O1 OS=Homo sapiens GN=FOXO1 PE=1 SV=2 - [FOXO1_HUMAN]	1	Q12778	S287	Forkhead box protein O1 (Forkhead box protein O1A) (Forkhead in rhabdomyosarcoma)	FOXO1 FKHR FOXO1A																					Forward	Class I	kASLQSGQEGAGDsPGSQFSk	1	N-Term(Dimethyl); K1(Dimethyl); S14(Phospho); K21(Dimethyl)	102	ETD	29	1	2230.04	3	744.018	0.78	66.43	4866	OR5_101217_LM_HJ_Epac1_007_SCX_Phospho_F29.raw
KVVEAVNpSDpSDSEFGIPK	2	S(8): 100.0; S(10): 100.0; S(12): 0.0	436	Q02880	DNA topoisomerase 2-beta OS=Homo sapiens GN=TOP2B PE=1 SV=3 - [TOP2B_HUMAN]	1	Q02880	S1522, S1524	DNA topoisomerase 2-beta (EC 5.99.1.3) (DNA topoisomerase II, beta isozyme)	TOP2B																					Reverse	Class I	kVVEAVNsDsDSEFGIPk	1	N-Term(Dimethyl); K1(Dimethyl); S8(Phospho); S10(Phospho); K18(Dimethyl)	95	ETD	18-20	1	2164.98	3	722.332	-0.44	79.62	5267	20110105_LM_HJ_Epac_Rev_007_F18_F20.raw
SSpSLVDIREEETEGGSR	1	S(1): 0.0; S(2): 0.0; S(3): 100.0; T(12): 0.0; S(16): 0.0	436	Q96Q42	Alsin OS=Homo sapiens GN=ALS2 PE=1 SV=1 - [ALS2_HUMAN]	1	Q96Q42	S466	Alsin (Amyotrophic lateral sclerosis 2 chromosomal region candidate gene 6 protein) (Amyotrophic lateral sclerosis 2 protein)	ALS2 ALS2CR6 KIAA1563																					Reverse	Class I	sSsLVDIREEETEGGSR	1	N-Term(Dimethyl); S3(Phospho)	88	ETD	28	1	1958.87	3	653.628	-0.2	84.16	5824	20110105_LM_HJ_Epac_Rev_007_F28.raw
LPSGSGAApSPTGSAVDIR	1	S(3): 0.0; S(5): 0.0; S(9): 100.0; T(11): 0.0; S(13): 0.0	436	Q09666	Neuroblast differentiation-associated protein AHNAK OS=Homo sapiens GN=AHNAK PE=1 SV=2 - [AHNK_HUMAN]	1	Q09666	S216	Neuroblast differentiation-associated protein AHNAK (Desmoyokin)	AHNAK PM227																					Reverse	Class I	lPSGSGAAsPTGSAVDIR	1	N-Term(Dimethyl); S9(Phospho)	128	ETD	14	0	1750.84	3	584.284	0.76	84.06	6421	20110105_LM_HJ_Epac_Rev_007_F14.raw
TDGFAEAIHpSPQVAGVPR	1	T(1): 0.0; S(10): 100.0	436	P12270	Nucleoprotein TPR OS=Homo sapiens GN=TPR PE=1 SV=2 - [TPR_HUMAN]	1	P12270	S2141	Nucleoprotein TPR	TPR																					Forward	Class I	tDGFAEAIHsPQVAGVPR	1	N-Term(Dimethyl:2H(4)); S10(Phospho)	101	ETD	27	0	1963.96	3	655.324	0.53	119.87	7888	OR5_101217_LM_HJ_Epac1_007_SCX_Phospho_F27.raw
YAALpSVDGEDENEGEDYAE	1	Y(1): 0.0; S(5): 100.0; Y(17): 0.0	435	P23588	Eukaryotic translation initiation factor 4B OS=Homo sapiens GN=EIF4B PE=1 SV=2 - [IF4B_HUMAN]	1	P23588	S597	Eukaryotic translation initiation factor 4B (eIF-4B)	EIF4B																					Forward	Class I	yAALsVDGEDENEGEDYAE	1	N-Term(Dimethyl:2H(4)); S5(Phospho)	102	ETD	1-3	0	2187.84	3	729.952	-0.59	77.19	6016	OR5_101215_LM_HJ_Epac1_007_SCX_Phospho_F1_F3.raw
AETASQSQRpSPISDNSGCDAPGNSNPSLSVPSSAESEK	1	T(3): 0.0; S(5): 0.0; S(7): 0.0; S(10): 100.0; S(13): 0.0; S(16): 0.0; S(24): 0.0; S(27): 0.0; S(29): 0.0; S(32): 0.0; S(33): 0.0; S(36): 0.0	434	Q99590	SFRS2-interacting protein OS=Homo sapiens GN=SFRS2IP PE=1 SV=1 - [SFRIP_HUMAN]	1	Q99590	S23	Protein SCAF11 (CTD-associated SR protein 11) (Renal carcinoma antigen NY-REN-40) (SC35-interacting protein 1) (SR-related and CTD-associated factor 11) (SRSF2-interacting protein) (Serine/arginine-rich splicing factor 2-interacting protein) (Splicing factor, arginine/serine-rich 2-interacting protein) (Splicing regulatory protein 129) (SRrp129)	SCAF11 CASP11 SFRS2IP SIP1 SRSF2IP																					Forward	Class I	aETASQSQRsPISDNSGcDAPGNSNPSLSVPSSAESEk	1	N-Term(Dimethyl); S10(Phospho); C18(Carbamidomethyl); K38(Dimethyl)	79	HCD	27	1	3984.74	3	1328.92	1.16	85.9	5638	OR5_101221_LM_HJ_Epac1_007_SCX_Phospho_F27.raw
EQGGSGLGSGSpSGGGGSTSGLGSGYIGR	1	S(5): 0.0; S(9): 0.0; S(11): 0.5; S(12): 99.5; S(17): 0.0; T(18): 0.0; S(19): 0.0; S(23): 0.0; Y(25): 0.0	434	Q2M2I8	AP2-associated protein kinase 1 OS=Homo sapiens GN=AAK1 PE=1 SV=2 - [AAK1_HUMAN]	1	Q2M2I8	S21	AP2-associated protein kinase 1 (EC 2.7.11.1) (Adaptor-associated kinase 1)	AAK1 KIAA1048																					Reverse	Class I	eQGGSGLGSGSsGGGGSTSGLGSGYIGR	1	N-Term(Dimethyl:2H(4)); S12(Phospho)	117	HCD	14	0	2498.11	2	1249.56	1.76	108.23	8954	20110114_LM_HJ_Epac_Rev_007_F14.raw
KDpSLPDADLASCGSLSQSSASFFTPR	1	S(3): 100.0; S(11): 0.0; S(14): 0.0; S(16): 0.0; S(18): 0.0; S(19): 0.0; S(21): 0.0; T(24): 0.0	433	Q86SQ0	Pleckstrin homology-like domain family B member 2 OS=Homo sapiens GN=PHLDB2 PE=1 SV=2 - [PHLB2_HUMAN]	1	Q86SQ0	S513	Pleckstrin homology-like domain family B member 2 (Protein LL5-beta)	PHLDB2 LL5B																					Reverse	Class I	kDsLPDADLAScGSLSQSSASFFTPR	1	K1(Dimethyl:2H(4)); N-Term(Dimethyl:2H(4)); S3(Phospho); C12(Carbamidomethyl)	87	HCD	27	1	2888.41	3	963.476	17.73	143.72	12342	20110114_LM_HJ_Epac_Rev_007_F27.raw
SFLDSGpYRILGAVAK	1	S(1): 0.0; S(5): 0.0; Y(7): 100.0	433	P18206	Vinculin OS=Homo sapiens GN=VCL PE=1 SV=4 - [VINC_HUMAN]	1	P18206	Y822	Vinculin (Metavinculin)	VCL																					Reverse	Class I	sFLDSGyRILGAVAk	1	N-Term(Dimethyl); Y7(Phospho); K15(Dimethyl)	58	HCD	28	1	1732.9	2	866.956	0.81	150.84	12778	20110114_LM_HJ_Epac_Rev_007_F28_2_110119042919.raw
LRKNpSEAGGAGPGPGK	1	S(5): 100.0	433	Q5VZ18	SH2 domain-containing adapter protein E OS=Homo sapiens GN=SHE PE=2 SV=1 - [SHE_HUMAN]	1	Q5VZ18	S69	SH2 domain-containing adapter protein E	SHE																					Reverse	Class I	lRkNsEAGGAGPGPGk	1	N-Term(Dimethyl); K3(Dimethyl); S5(Phospho); K16(Dimethyl)	115	ETD	33	2	1659.86	3	553.957	-0.59	26.19	1951	20110105_LM_HJ_Epac_Rev_007_F33.raw
TSpSGTSLSAMHSSGSSGK	1	T(1): 0.0; S(2): 0.0; S(3): 100.0; T(5): 0.0; S(6): 0.0; S(8): 0.0; S(12): 0.0; S(13): 0.0; S(15): 0.0; S(16): 0.0	433	Q12888	Tumor suppressor p53-binding protein 1 OS=Homo sapiens GN=TP53BP1 PE=1 SV=2 - [TP53B_HUMAN]	1	Q12888	S1317	Tumor suppressor p53-binding protein 1 (53BP1) (p53-binding protein 1) (p53BP1)	TP53BP1																					Forward	Class I	tSsGTSLSAMHSSGSSGk	1	N-Term(Dimethyl); S3(Phospho); K18(Dimethyl)	117	ETD	28	0	1804.78	3	602.264	0.17	46.2	3346	OR5_101221_LM_HJ_Epac1_007_SCX_Phospho_F28.raw
HTGPNpSPDTANDGFVR	1	T(2): 0.0; S(6): 100.0; T(9): 0.0	433	P31943;P55795	Heterogeneous nuclear ribonucleoprotein H OS=Homo sapiens GN=HNRNPH1 PE=1 SV=4 - [HNRH1_HUMAN]|Heterogeneous nuclear ribonucleoprotein H2 OS=Homo sapiens GN=HNRNPH2 PE=1 SV=1 - [HNRH2_HUMAN]	2	P31943	S104	Heterogeneous nuclear ribonucleoprotein H (hnRNP H) [Cleaved into: Heterogeneous nuclear ribonucleoprotein H, N-terminally processed]	HNRNPH1 HNRPH HNRPH1	P55795	S104	Heterogeneous nuclear ribonucleoprotein H2 (hnRNP H2) (FTP-3) (Heterogeneous nuclear ribonucleoprotein H') (hnRNP H')	HNRNPH2 FTP3 HNRPH2																	Reverse	Class I	hTGPNsPDTANDGFVR	1	N-Term(Dimethyl); S6(Phospho)	88	ETD	29	0	1792.77	3	598.26	0.21	60.92	4337	20110105_LM_HJ_Epac_Rev_007_F29_2.raw
ASQSRPNpSSALETLGGEK	1	S(2): 0.0; S(4): 0.0; S(8): 100.0; S(9): 0.0; T(13): 0.0	433	O94804	Serine/threonine-protein kinase 10 OS=Homo sapiens GN=STK10 PE=1 SV=1 - [STK10_HUMAN]	1	O94804	S454	Serine/threonine-protein kinase 10 (EC 2.7.11.1) (Lymphocyte-oriented kinase)	STK10 LOK																					Forward	Class I	aSQSRPNsSALETLGGEk	1	N-Term(Dimethyl:2H(4)); S8(Phospho); K18(Dimethyl:2H(4))	94	ETD	28	0	1976	3	659.337	1.73	84.58	5896	OR5_101221_LM_HJ_Epac1_007_SCX_Phospho_F28.raw
CSMSSSADFpSDEDDFSQK	1	S(2): 0.0; S(4): 0.0; S(5): 0.0; S(6): 0.0; S(10): 100.0; S(16): 0.0	433	Q03001	Bullous pemphigoid antigen 1, isoforms 1/2/3/4/5/8 (Fragment) OS=Homo sapiens GN=DST PE=1 SV=3 - [BPA1_HUMAN]	1	Q03001	S163	Dystonin (230 kDa bullous pemphigoid antigen) (230/240 kDa bullous pemphigoid antigen) (Bullous pemphigoid antigen 1) (BPA) (Bullous pemphigoid antigen) (Dystonia musculorum protein) (Hemidesmosomal plaque protein)	DST BP230 BP240 BPAG1 DMH DT KIAA0728																					Forward	Class I	cSMSSSADFsDEDDFSQk	1	N-Term(Dimethyl); C1(Carbamidomethyl); S10(Phospho); K18(Dimethyl)	104	ETD	14	0	2178.79	3	726.935	0.44	109.05	8025	OR5_101221_LM_HJ_Epac1_007_SCX_Phospho_F14.raw
EQTLpSPTITSGLHNIAR	1	T(3): 0.0; S(5): 100.0; T(7): 0.0; T(9): 0.0; S(10): 0.0	433	O94979	Protein transport protein Sec31A OS=Homo sapiens GN=SEC31A PE=1 SV=3 - [SC31A_HUMAN]	1	O94979	S1163	Protein transport protein Sec31A (ABP125) (ABP130) (SEC31-like protein 1) (SEC31-related protein A) (Web1-like protein)	SEC31A KIAA0905 SEC31L1 HSPC275 HSPC334																					Reverse	Class I	eQTLsPTITSGLHNIAR	1	N-Term(Dimethyl); S5(Phospho)	83	ETD	28	0	1945.98	3	649.331	1.44	125.45	8087	20110105_LM_HJ_Epac_Rev_007_F28.raw
SLAALDALNpTDDENDEEEYEAWK	1	S(1): 0.0; T(10): 100.0; Y(19): 0.0	432	P55081	Microfibrillar-associated protein 1 OS=Homo sapiens GN=MFAP1 PE=1 SV=2 - [MFAP1_HUMAN]	1	P55081	T267	Microfibrillar-associated protein 1	MFAP1																					Reverse	Class I	sLAALDALNtDDENDEEEYEAWk	1	N-Term(Dimethyl:2H(4)); T10(Phospho); K23(Dimethyl:2H(4))	94	HCD	14	0	2785.23	3	929.08	1.58	145.62	11070	20110105_LM_HJ_Epac_Rev_007_F14.raw
QSSGASSSSFSSSRApSSSR	1	S(2): 0.0; S(3): 0.0; S(6): 0.0; S(7): 0.0; S(8): 0.0; S(9): 0.0; S(11): 0.0; S(12): 0.0; S(13): 0.0; S(16): 100.0; S(17): 0.0; S(18): 0.0	432	O00571	ATP-dependent RNA helicase DDX3X OS=Homo sapiens GN=DDX3X PE=1 SV=3 - [DDX3X_HUMAN]	1	O00571	S619	ATP-dependent RNA helicase DDX3X (EC 3.6.4.13) (DEAD box protein 3, X-chromosomal) (DEAD box, X isoform) (Helicase-like protein 2) (HLP2)	DDX3X DBX DDX3																					Forward	Class I	qSSGASSSSFSSSRAsSSR	1	N-Term(Dimethyl:2H(4)); S16(Phospho)	106	ETD	28	1	1961.84	3	654.62	-2.74	33.74	2506	OR5_101217_LM_HJ_Epac1_007_SCX_Phospho_F28.raw
ILEQQNSSRpTLEK	1	S(7): 0.0; S(8): 0.0; T(10): 100.0	432	Q16181	Septin-7 OS=Homo sapiens GN=SEPT7 PE=1 SV=2 - [SEPT7_HUMAN]	1	Q16181	T426	Septin-7 (CDC10 protein homolog)	SEPT7 CDC10																					Forward	Class I	iLEQQNSSRtLEk	1	N-Term(Dimethyl:2H(4)); T10(Phospho); K13(Dimethyl:2H(4))	90	ETD	28	1	1689.9	3	563.973	0.98	49.49	3582	OR5_101217_LM_HJ_Epac1_007_SCX_Phospho_F28.raw
LPSGSGAApSPTGpSAVDIR	2	S(3): 0.0; S(5): 0.0; S(9): 99.9; T(11): 0.1; S(13): 100.0	432	Q09666	Neuroblast differentiation-associated protein AHNAK OS=Homo sapiens GN=AHNAK PE=1 SV=2 - [AHNK_HUMAN]	1	Q09666	S216, S220	Neuroblast differentiation-associated protein AHNAK (Desmoyokin)	AHNAK PM227																					Forward	Class I	lPSGSGAAsPTGsAVDIR	1	N-Term(Dimethyl:2H(4)); S9(Phospho); S13(Phospho)	126	ETD	7	0	1834.83	3	612.282	1.1	59.14	4195	OR5_101215_LM_HJ_Epac1_007_SCX_Phospho_F7.raw
SNpSVGIQDAFNDGSDSTFQK	1	S(1): 0.2; S(3): 99.8; S(14): 0.0; S(16): 0.0; T(17): 0.0	431	O14497	AT-rich interactive domain-containing protein 1A OS=Homo sapiens GN=ARID1A PE=1 SV=3 - [ARI1A_HUMAN]	1	O14497	S1184	AT-rich interactive domain-containing protein 1A (ARID domain-containing protein 1A) (B120) (BRG1-associated factor 250) (BAF250) (BRG1-associated factor 250a) (BAF250A) (Osa homolog 1) (hOSA1) (SWI-like protein) (SWI/SNF complex protein p270) (SWI/SNF-related, matrix-associated, actin-dependent regulator of chromatin subfamily F member 1) (hELD)	ARID1A BAF250 BAF250A C1orf4 OSA1 SMARCF1																					Reverse	Class I	sNsVGIQDAFNDGSDSTFQk	1	N-Term(Dimethyl:2H(4)); S3(Phospho); K20(Dimethyl:2H(4))	109	HCD	13	0	2261.02	2	1131.02	1.63	137.2	11053	20110114_LM_HJ_Epac_Rev_007_F13.raw
RAAVGQEpSPGGLEAGNAK	1	S(8): 100.0	431	Q29RF7	Sister chromatid cohesion protein PDS5 homolog A OS=Homo sapiens GN=PDS5A PE=1 SV=1 - [PDS5A_HUMAN]	1	Q29RF7	S1305	Sister chromatid cohesion protein PDS5 homolog A (Cell proliferation-inducing gene 54 protein) (Sister chromatid cohesion protein 112) (SCC-112)	PDS5A KIAA0648 PDS5 PIG54																					Forward	Class I	rAAVGQEsPGGLEAGNAk	1	N-Term(Dimethyl); S8(Phospho); K18(Dimethyl)	116	ETD	29	1	1847.9	3	616.638	-0.27	58.15	4221	OR5_101221_LM_HJ_Epac1_007_SCX_Phospho_F29.raw
QHAALAAQSKpSSEDIIK	1	S(9): 0.0; S(11): 100.0; S(12): 0.0	431	O14639	Actin-binding LIM protein 1 OS=Homo sapiens GN=ABLIM1 PE=1 SV=3 - [ABLM1_HUMAN]	1	O14639	S540	Actin-binding LIM protein 1 (abLIM-1) (Actin-binding LIM protein family member 1) (Actin-binding double zinc finger protein) (LIMAB1) (Limatin)	ABLIM1 ABLIM KIAA0059 LIMAB1																					Forward	Class I	qHAALAAQSksSEDIIk	1	N-Term(Dimethyl:2H(4)); K10(Dimethyl:2H(4)); S11(Phospho); K17(Dimethyl:2H(4))	116	ETD	32	1	1973.08	3	658.366	-0.84	70.6	4346	OR5_101217_LM_HJ_Epac1_007_SCX_Phospho_F32.raw
HEVSASTQSpTPASSR	1	S(4): 0.0; S(6): 0.0; T(7): 0.0; S(9): 0.0; T(10): 100.0; S(13): 0.0; S(14): 0.0	430	Q01082	Spectrin beta chain, brain 1 OS=Homo sapiens GN=SPTBN1 PE=1 SV=2 - [SPTB2_HUMAN]	1	Q01082	T2320	Spectrin beta chain, brain 1 (Beta-II spectrin) (Fodrin beta chain) (Spectrin, non-erythroid beta chain 1)	SPTBN1 SPTB2																					Forward	Class I	hEVSASTQStPASSR	1	N-Term(Dimethyl:2H(4)); T10(Phospho)	110	ETD	30	0	1656.75	3	552.923	0.66	26.23	2037	OR5_101217_LM_HJ_Epac1_007_SCX_Phospho_F30.raw
QQFYHpSVQDLSGGSR	1	Y(4): 0.0; S(6): 100.0; S(11): 0.0; S(14): 0.0	430	P10398	A-Raf proto-oncogene serine/threonine-protein kinase OS=Homo sapiens GN=ARAF PE=1 SV=2 - [ARAF_HUMAN]	1	P10398	S157	Serine/threonine-protein kinase A-Raf (EC 2.7.11.1) (Proto-oncogene A-Raf) (Proto-oncogene A-Raf-1) (Proto-oncogene Pks)	ARAF ARAF1 PKS PKS2																					Reverse	Class I	qQFYHsVQDLSGGSR	1	N-Term(Dimethyl); S6(Phospho)	79	ETD	28	0	1816.83	3	606.283	17.69	95.29	7849	20110114_LM_HJ_Epac_Rev_007_F28.raw
ILpSDVTHSAVFGVPASK	1	S(3): 100.0; T(6): 0.0; S(8): 0.0; S(16): 0.0	430	Q2M2I8	AP2-associated protein kinase 1 OS=Homo sapiens GN=AAK1 PE=1 SV=2 - [AAK1_HUMAN]	1	Q2M2I8	S637	AP2-associated protein kinase 1 (EC 2.7.11.1) (Adaptor-associated kinase 1)	AAK1 KIAA1048																					Forward	Class I	iLsDVTHSAVFGVPASk	1	N-Term(Dimethyl:2H(4)); S3(Phospho); K17(Dimethyl:2H(4))	118	ETD	27	0	1872.01	3	624.676	0.78	136.22	8946	OR5_101217_LM_HJ_Epac1_007_SCX_Phospho_F27.raw
KEESEEpSDDDMGFGLFD	1	S(4): 0.0; S(7): 100.0	429	P05386;P05387	60S acidic ribosomal protein P1 OS=Homo sapiens GN=RPLP1 PE=1 SV=1 - [RLA1_HUMAN]|60S acidic ribosomal protein P2 OS=Homo sapiens GN=RPLP2 PE=1 SV=1 - [RLA2_HUMAN]	2	P05386	S104	60S acidic ribosomal protein P1	RPLP1 RRP1	P05387		60S acidic ribosomal protein P2 (Renal carcinoma antigen NY-REN-44)	RPLP2 D11S2243E RPP2																	Forward	Class I	kEESEEsDDDMGFGLFD	1	N-Term(Dimethyl:2H(4)); K1(Dimethyl:2H(4)); S7(Phospho)	104	ETD	14	1	2093.84	3	698.618	0.04	161.23	13535	OR5_101215_LM_HJ_Epac1_007_SCX_Phospho_F14.raw
KTGSPGpSPGAGGVQSTAK	1	T(2): 0.0; S(4): 0.0; S(7): 100.0; S(15): 0.0; T(16): 0.0	429	O43237	Cytoplasmic dynein 1 light intermediate chain 2 OS=Homo sapiens GN=DYNC1LI2 PE=1 SV=1 - [DC1L2_HUMAN]	1	O43237	S446	Cytoplasmic dynein 1 light intermediate chain 2 (Dynein light intermediate chain 2, cytosolic) (LIC-2) (LIC53/55)	DYNC1LI2 DNCLI2 LIC2																					Reverse	Class I	kTGSPGsPGAGGVQSTAk	1	N-Term(Dimethyl); K1(Dimethyl); S7(Phospho); K18(Dimethyl)	85	ETD	28	1	1750.87	3	584.295	-1.62	30.11	2250	20110105_LM_HJ_Epac_Rev_007_F28.raw
ANGQENGHVKpSNGDLSPK	1	S(11): 100.0; S(16): 0.0	429	P49006	MARCKS-related protein OS=Homo sapiens GN=MARCKSL1 PE=1 SV=2 - [MRP_HUMAN]	1	P49006	S36	MARCKS-related protein (MARCKS-like protein 1) (Macrophage myristoylated alanine-rich C kinase substrate) (Mac-MARCKS) (MacMARCKS)	MARCKSL1 MLP MRP																					Forward	Class I	aNGQENGHVksNGDLSPk	1	N-Term(Dimethyl); K10(Dimethyl); S11(Phospho); K18(Dimethyl)	110	ETD	31	1	2015.96	3	672.657	0.39	32.37	2381	OR5_101221_LM_HJ_Epac1_007_SCX_Phospho_F31.raw
HFPLDLRTpSMDGK	1	T(8): 0.0; S(9): 100.0	429	Q01433	AMP deaminase 2 OS=Homo sapiens GN=AMPD2 PE=1 SV=2 - [AMPD2_HUMAN]	1	Q01433	S118	AMP deaminase 2 (EC 3.5.4.6) (AMP deaminase isoform L)	AMPD2																					Forward	Class I	hFPLDLRTsmDGk	1	N-Term(Dimethyl); S9(Phospho); M10(Oxidation); K13(Dimethyl)	68	ETD	33	1	1668.78	3	556.932	0.58	119.04	7016	OR5_101217_LM_HJ_Epac1_007_SCX_Phospho_F33.raw
IYHLPDAEpSDEDEDFK	1	Y(2): 0.0; S(9): 100.0	429	Q15019	Septin-2 OS=Homo sapiens GN=SEPT2 PE=1 SV=1 - [SEPT2_HUMAN]	1	Q15019	S218	Septin-2 (Neural precursor cell expressed developmentally down-regulated protein 5) (NEDD-5)	SEPT2 DIFF6 KIAA0158 NEDD5																					Reverse	Class I	iYHLPDAEsDEDEDFk	1	N-Term(Dimethyl:2H(4)); S9(Phospho); K16(Dimethyl:2H(4))	80	ETD	28	0	2066.9	3	689.639	-2.76	119.28	7861	20110105_LM_HJ_Epac_Rev_007_F28_2.raw
NLHQSGFSLpSGTQVDEGVR	1	S(5): 0.0; S(8): 0.0; S(10): 100.0; T(12): 0.0	429	Q14195	Dihydropyrimidinase-related protein 3 OS=Homo sapiens GN=DPYSL3 PE=1 SV=1 - [DPYL3_HUMAN]	1	Q14195	S541	Dihydropyrimidinase-related protein 3 (DRP-3) (Collapsin response mediator protein 4) (CRMP-4) (Unc-33-like phosphoprotein 1) (ULIP-1)	DPYSL3 CRMP4 DRP3 ULIP ULIP1																					Forward	Class I	nLHQSGFSLsGTQVDEGVR	1	N-Term(Dimethyl:2H(4)); S10(Phospho)	100	ETD	29	0	2143.01	3	715.009	0.25	118.75	8073	OR5_101217_LM_HJ_Epac1_007_SCX_Phospho_F29.raw
RDpSSDDWEIPDGQITVGQR	1	S(3): 100.0; S(4): 0.0; T(15): 0.0	429	P15056	B-Raf proto-oncogene serine/threonine-protein kinase OS=Homo sapiens GN=BRAF PE=1 SV=4 - [BRAF1_HUMAN]	1	P15056	S446	Serine/threonine-protein kinase B-raf (EC 2.7.11.1) (Proto-oncogene B-Raf) (p94) (v-Raf murine sarcoma viral oncogene homolog B1)	BRAF BRAF1 RAFB1																					Forward	Class I	rDsSDDWEIPDGQITVGQR	1	N-Term(Dimethyl:2H(4)); S3(Phospho)	82	HCD	28	1	2286.03	2	1143.52	0.12	134.31	9125	OR5_101221_LM_HJ_Epac1_007_SCX_Phospho_F28.raw
GSNSGMDpSNIDLTIVEDEEEESVALEQAQK	1	S(2): 0.0; S(4): 0.0; S(8): 100.0; T(13): 0.0; S(22): 0.0	428	O95810	Serum deprivation-response protein OS=Homo sapiens GN=SDPR PE=1 SV=3 - [SDPR_HUMAN]	1	O95810	S370	Serum deprivation-response protein (Cavin-2) (PS-p68) (Phosphatidylserine-binding protein)	SDPR																					Reverse	Class I	gSNSGMDsNIDLTIVEDEEEESVALEQAQk	1	N-Term(Dimethyl); S8(Phospho); K30(Dimethyl)	82	HCD	13	0	3373.49	3	1125.17	-0.52	147.64	10815	20110105_LM_HJ_Epac_Rev_007_F13.raw
IpSMSEVDLNVAAPK	1	S(2): 100.0; S(4): 0.0	428	Q09666	Neuroblast differentiation-associated protein AHNAK OS=Homo sapiens GN=AHNAK PE=1 SV=2 - [AHNK_HUMAN]	1	Q09666	S570	Neuroblast differentiation-associated protein AHNAK (Desmoyokin)	AHNAK PM227																					Forward	Class I	ismSEVDLNVAAPk	1	N-Term(Dimethyl:2H(4)); S2(Phospho); M3(Oxidation); K14(Dimethyl:2H(4))	90	ETD	13	0	1633.84	3	545.284	0.49	113.87	7780	OR5_101216_LM_HJ_Epac1_007_SCX_Phospho_F13.raw
EGHSLEMENENLVENGADpSDEDDNSFLK	1	S(4): 0.0; S(19): 100.0; S(25): 0.0	428	Q9UHB6	LIM domain and actin-binding protein 1 OS=Homo sapiens GN=LIMA1 PE=1 SV=1 - [LIMA1_HUMAN]	1	Q9UHB6	S686	LIM domain and actin-binding protein 1 (Epithelial protein lost in neoplasm)	LIMA1 EPLIN SREBP3 PP624																					Forward	Class I	eGHSLEMENENLVENGADsDEDDNSFLk	1	N-Term(Dimethyl); S19(Phospho); K28(Dimethyl)	78	HCD	28	0	3273.35	3	1091.79	1.84	135.1	9186	OR5_101221_LM_HJ_Epac1_007_SCX_Phospho_F28.raw
RVALpSDDETKETENMR	1	S(5): 100.0; T(9): 0.0; T(12): 0.0	427	Q15054	DNA polymerase delta subunit 3 OS=Homo sapiens GN=POLD3 PE=1 SV=2 - [DPOD3_HUMAN]	1	Q15054	S307	DNA polymerase delta subunit 3 (DNA polymerase delta subunit p66)	POLD3 KIAA0039																					Forward	Class I	rVALsDDETkETENmR	1	N-Term(Dimethyl); S5(Phospho); K10(Dimethyl); M15(Oxidation)	102	ETD	32	2	2045.92	3	682.645	0.19	55.65	3573	OR5_101217_LM_HJ_Epac1_007_SCX_Phospho_F32.raw
RKEpSSNTDSAGALGTLR	1	S(4): 100.0; S(5): 0.0; T(7): 0.0; S(9): 0.0; T(15): 0.0	427	P29474	Nitric oxide synthase, endothelial OS=Homo sapiens GN=NOS3 PE=1 SV=3 - [NOS3_HUMAN]	1	P29474	S633	Nitric oxide synthase, endothelial (EC 1.14.13.39) (Constitutive NOS) (cNOS) (EC-NOS) (Endothelial NOS) (eNOS) (NOS type III) (NOSIII)	NOS3																					Reverse	Class I	rkEsSNTDSAGALGTLR	1	N-Term(Dimethyl:2H(4)); K2(Dimethyl:2H(4)); S4(Phospho)	117	ETD	33	2	1906.99	3	636.334	1.4	67.61	4300	20110105_LM_HJ_Epac_Rev_007_F33.raw
AVPMAPAPApSPGSSNDSSAR	1	S(10): 100.0; S(13): 0.0; S(14): 0.0; S(17): 0.0; S(18): 0.0	427	Q66K74	Microtubule-associated protein 1S OS=Homo sapiens GN=MAP1S PE=1 SV=2 - [MAP1S_HUMAN]	1	Q66K74	S759	Microtubule-associated protein 1S (MAP-1S) (BPY2-interacting protein 1) (Microtubule-associated protein 8) (Variable charge Y chromosome 2-interacting protein 1) (VCY2-interacting protein 1) (VCY2IP-1) [Cleaved into: MAP1S heavy chain; MAP1S light chain]	MAP1S BPY2IP1 C19orf5 MAP8 VCY2IP1																					Forward	Class I	aVPMAPAPAsPGSSNDSSAR	1	N-Term(Dimethyl:2H(4)); S10(Phospho)	100	ETD	14	0	1981.9	3	661.305	0.73	75.07	6505	OR5_101215_LM_HJ_Epac1_007_SCX_Phospho_F14.raw
IRTQpSFSLQER	1	T(3): 0.0; S(5): 100.0; S(7): 0.0	427	P29474	Nitric oxide synthase, endothelial OS=Homo sapiens GN=NOS3 PE=1 SV=3 - [NOS3_HUMAN]	1	P29474	S1177	Nitric oxide synthase, endothelial (EC 1.14.13.39) (Constitutive NOS) (cNOS) (EC-NOS) (Endothelial NOS) (eNOS) (NOS type III) (NOSIII)	NOS3																					Forward	Class I	iRTQsFSLQER	1	N-Term(Dimethyl:2H(4)); S5(Phospho)	60	ETD	29	1	1476.75	3	492.922	0.32	96.86	6556	OR5_101221_LM_HJ_Epac1_007_SCX_Phospho_F29.raw
ASTIFLSKpSQTDVR	1	S(2): 0.0; T(3): 0.0; S(7): 0.0; S(9): 100.0; T(11): 0.0	427	Q8ND76;Q8N7R7	Cyclin-Y OS=Homo sapiens GN=CCNY PE=1 SV=2 - [CCNY_HUMAN]|Cyclin-Y-like protein 1 OS=Homo sapiens GN=CCNYL1 PE=1 SV=2 - [CCYL1_HUMAN]	2	Q8ND76	S73	Cyclin-Y (Cyc-Y) (Cyclin box protein 1) (Cyclin fold protein 1) (cyclin-X)	CCNY C10orf9 CBCP1 CFP1	Q8N7R7	S95	Cyclin-Y-like protein 1	CCNYL1																	Reverse	Class I	aSTIFLSksQTDVR	1	N-Term(Dimethyl:2H(4)); K8(Dimethyl:2H(4)); S9(Phospho)	102	ETD	28	1	1696.91	3	566.308	-2.49	102.95	6917	20110105_LM_HJ_Epac_Rev_007_F28_2.raw
IHAESLLLDpSPAVAK	1	S(5): 0.0; S(10): 100.0	427	Q9H4L5	Oxysterol-binding protein-related protein 3 OS=Homo sapiens GN=OSBPL3 PE=1 SV=1 - [OSBL3_HUMAN]	1	Q9H4L5	S410	Oxysterol-binding protein-related protein 3 (ORP-3) (OSBP-related protein 3)	OSBPL3 KIAA0704 ORP3 OSBP3																					Reverse	Class I	iHAESLLLDsPAVAk	1	N-Term(Dimethyl); S10(Phospho); K15(Dimethyl)	121	ETD	29	0	1699.9	3	567.306	0.91	121.84	8020	20110105_LM_HJ_Epac_Rev_007_F29_2.raw
VNFSEEGEpTEEDDQDSSHSSVTTVK	1	S(4): 0.0; T(9): 100.0; S(16): 0.0; S(17): 0.0; S(19): 0.0; S(20): 0.0; T(22): 0.0; T(23): 0.0	427	Q5JTV8	Torsin-1A-interacting protein 1 OS=Homo sapiens GN=TOR1AIP1 PE=1 SV=2 - [TOIP1_HUMAN]	1	Q5JTV8	T220	Torsin-1A-interacting protein 1 (Lamin-associated protein 1B) (LAP1B)	TOR1AIP1																					Reverse	Class I	vNFSEEGEtEEDDQDSSHSSVTTVk	1	N-Term(Dimethyl:2H(4)); T9(Phospho); K25(Dimethyl:2H(4))	121	HCD	27	0	2900.29	2	1450.65	15.19	100.24	8219	20110114_LM_HJ_Epac_Rev_007_F27_2.raw
VLLGFSSDEpSDVEASPR	1	S(6): 0.0; S(7): 0.0; S(10): 100.0; S(15): 0.0	426	Q9Y2U8	Inner nuclear membrane protein Man1 OS=Homo sapiens GN=LEMD3 PE=1 SV=2 - [MAN1_HUMAN]	1	Q9Y2U8	S144	Inner nuclear membrane protein Man1 (LEM domain-containing protein 3)	LEMD3 MAN1																					Forward	Class I	vLLGFSSDEsDVEASPR	1	N-Term(Dimethyl); S10(Phospho)	96	ETD	14	0	1915.87	3	639.295	0.76	145.85	12370	OR5_101215_LM_HJ_Epac1_007_SCX_Phospho_F14.raw
VQAMQISpSEKEEDDNEK	1	S(7): 0.0; S(8): 100.0	426	Q9UKY7	Protein CDV3 homolog OS=Homo sapiens GN=CDV3 PE=1 SV=1 - [CDV3_HUMAN]	1	Q9UKY7	S107	Protein CDV3 homolog	CDV3 H41																					Reverse	Class I	vQAmQISsEkEEDDNEk	1	N-Term(Dimethyl:2H(4)); M4(Oxidation); S8(Phospho); K10(Dimethyl:2H(4)); K17(Dimethyl:2H(4))	96	ETD	27	1	2172.02	3	724.677	-0.42	38.53	2661	20110105_LM_HJ_Epac_Rev_007_F27_2.raw
RGHTApSESDEQQWPEEK	1	T(4): 0.0; S(6): 100.0; S(8): 0.0	426	Q9NTI5	Sister chromatid cohesion protein PDS5 homolog B OS=Homo sapiens GN=PDS5B PE=1 SV=1 - [PDS5B_HUMAN]	1	Q9NTI5	S1257	Sister chromatid cohesion protein PDS5 homolog B (Androgen-induced proliferation inhibitor) (Androgen-induced prostate proliferative shutoff-associated protein AS3)	PDS5B APRIN AS3 KIAA0979																					Forward	Class I	rGHTAsESDEQQWPEEk	1	N-Term(Dimethyl); S6(Phospho); K17(Dimethyl)	70	ETD	34	1	2149.92	3	717.311	-0.24	61.92	4080	OR5_101217_LM_HJ_Epac1_007_SCX_Phospho_F34.raw
TLDRpSGDLGDMEPLK	1	T(1): 0.0; S(5): 100.0	426	O60716	Catenin delta-1 OS=Homo sapiens GN=CTNND1 PE=1 SV=1 - [CTND1_HUMAN]	1	O60716	S920	Catenin delta-1 (Cadherin-associated Src substrate) (CAS) (p120 catenin) (p120(ctn)) (p120(cas))	CTNND1 KIAA0384																					Forward	Class I	tLDRsGDLGDMEPLk	1	N-Term(Dimethyl:2H(4)); S5(Phospho); K15(Dimethyl:2H(4))	76	ETD	28	1	1790.89	3	597.633	0.28	115.51	7904	OR5_101221_LM_HJ_Epac1_007_SCX_Phospho_F28.raw
LLSSNEDDANILSpSPTDR	1	S(3): 0.0; S(4): 0.0; S(13): 0.0; S(14): 100.0; T(16): 0.0	426	O75448	Mediator of RNA polymerase II transcription subunit 24 OS=Homo sapiens GN=MED24 PE=1 SV=1 - [MED24_HUMAN]	1	O75448	S873	Mediator of RNA polymerase II transcription subunit 24 (Activator-recruited cofactor 100 kDa component) (ARC100) (Cofactor required for Sp1 transcriptional activation subunit 4) (CRSP complex subunit 4) (Mediator complex subunit 24) (Thyroid hormone receptor-associated protein 4) (Thyroid hormone receptor-associated protein complex 100 kDa component) (Trap100) (hTRAP100) (Vitamin D3 receptor-inte…	MED24 ARC100 CRSP4 DRIP100 KIAA0130 THRAP4 TRAP100																					Forward	Class I	lLSSNEDDANILSsPTDR	1	N-Term(Dimethyl:2H(4)); S14(Phospho)	86	ETD	14	0	2058.96	3	686.99	1.27	113.22	8309	OR5_101221_LM_HJ_Epac1_007_SCX_Phospho_F14.raw
DMEpSPTKLDVTLAK	1	S(4): 100.0; T(6): 0.0; T(11): 0.0	426	P27816	Microtubule-associated protein 4 OS=Homo sapiens GN=MAP4 PE=1 SV=2 - [MAP4_HUMAN]	1	P27816	S280	Microtubule-associated protein 4 (MAP-4)	MAP4																					Forward	Class I	dMEsPTkLDVTLAk	1	N-Term(Dimethyl); S4(Phospho); K7(Dimethyl); K14(Dimethyl)	77	ETD	26	1	1711.86	3	571.291	-0.53	124.4	8728	OR5_101217_LM_HJ_Epac1_007_SCX_Phospho_F26.raw
AEDGpSVIDYELIDQDAR	1	S(5): 100.0; Y(9): 0.0	426	P07355	Annexin A2 OS=Homo sapiens GN=ANXA2 PE=1 SV=2 - [ANXA2_HUMAN]	1	P07355	S184	Annexin A2 (Annexin II) (Annexin-2) (Calpactin I heavy chain) (Calpactin-1 heavy chain) (Chromobindin-8) (Lipocortin II) (Placental anticoagulant protein IV) (PAP-IV) (Protein I) (p36)	ANXA2 ANX2 ANX2L4 CAL1H LPC2D																					Forward	Class I	aEDGsVIDYELIDQDAR	1	N-Term(Dimethyl:2H(4)); S5(Phospho)	83	ETD	13	0	2020.91	3	674.307	0.11	139.66	9864	OR5_101221_LM_HJ_Epac1_007_SCX_Phospho_F13.raw
QGpSPDQVSPVSEMTSTSLYQDK	1	S(3): 100.0; S(8): 0.0; S(11): 0.0; T(14): 0.0; S(15): 0.0; T(16): 0.0; S(17): 0.0; Y(19): 0.0	426	P46821	Microtubule-associated protein 1B OS=Homo sapiens GN=MAP1B PE=1 SV=1 - [MAP1B_HUMAN]	1	P46821	S1438	Microtubule-associated protein 1B (MAP-1B) [Cleaved into: MAP1 light chain LC1]	MAP1B																					Reverse	Class I	qGsPDQVSPVSEMTSTSLYQDk	1	N-Term(Dimethyl:2H(4)); S3(Phospho); K22(Dimethyl:2H(4))	84	HCD	13	0	2528.17	3	843.395	-0.59	136.38	9943	20110105_LM_HJ_Epac_Rev_007_F13.raw
QEDVGFRGNpSPEMR	1	S(10): 100.0	425	Q9P266	Uncharacterized protein KIAA1462 OS=Homo sapiens GN=KIAA1462 PE=2 SV=3 - [K1462_HUMAN]	1	Q9P266	S885	Junctional protein associated with coronary artery disease (JCAD)	KIAA1462 JCAD																					Reverse	Class I	qEDVGFRGNsPEmR	1	N-Term(Dimethyl); S10(Phospho); M13(Oxidation)	78	ETD	29	1	1745.73	3	582.582	-0.53	51.48	3679	20110105_LM_HJ_Epac_Rev_007_F29_2.raw
DIKFDDpSDTEQIAEEGDDNLANSASPSK	1	S(7): 100.0; T(9): 0.0; S(23): 0.0; S(25): 0.0; S(27): 0.0	425	Q9Y2I7	FYVE finger-containing phosphoinositide kinase OS=Homo sapiens GN=PIP5K3 PE=1 SV=2 - [FYV1_HUMAN]	1	Q9Y2I7	S475	1-phosphatidylinositol 3-phosphate 5-kinase (Phosphatidylinositol 3-phosphate 5-kinase) (EC 2.7.1.150) (FYVE finger-containing phosphoinositide kinase) (PIKfyve) (Phosphatidylinositol 3-phosphate 5-kinase type III) (PIPkin-III) (Type III PIP kinase)	PIKFYVE KIAA0981 PIP5K3																					Reverse	Class I	dIkFDDsDTEQIAEEGDDNLANSASPSk	2	N-Term(Dimethyl); K3(Dimethyl); S7(Phospho); K28(Dimethyl)	87	HCD	21-24	1	3175.38	3	1059.13	-0.38	83.67	5652	20110105_LM_HJ_Epac_Rev_007_F21_F24.raw
LSKpSQGGEEEGPLSDK	1	S(2): 0.0; S(4): 100.0; S(14): 0.0	424	Q9H063	Repressor of RNA polymerase III transcription MAF1 homolog OS=Homo sapiens GN=MAF1 PE=1 SV=1 - [MAF1_HUMAN]	1	Q9H063	S75	Repressor of RNA polymerase III transcription MAF1 homolog	MAF1																					Forward	Class I	lSksQGGEEEGPLSDk	1	N-Term(Dimethyl:2H(4)); K3(Dimethyl:2H(4)); S4(Phospho); K16(Dimethyl:2H(4))	87	ETD	27	1	1836.94	3	612.985	0.47	65.81	4449	OR5_101217_LM_HJ_Epac1_007_SCX_Phospho_F27.raw
APEAAVSEDGKpSDDELLSSK	1	S(7): 0.0; S(12): 100.0; S(18): 0.0; S(19): 0.0	424	Q8NEY1	Neuron navigator 1 OS=Homo sapiens GN=NAV1 PE=1 SV=2 - [NAV1_HUMAN]	1	Q8NEY1	S199	Neuron navigator 1 (Pore membrane and/or filament-interacting-like protein 3) (Steerin-1) (Unc-53 homolog 1) (unc53H1)	NAV1 KIAA1151 KIAA1213 POMFIL3 STEERIN1																					Forward	Class I	aPEAAVSEDGksDDELLSSk	1	N-Term(Dimethyl); K11(Dimethyl); S12(Phospho); K20(Dimethyl)	130	ETD	27	1	2212.03	3	738.014	0.11	89.9	5956	OR5_101217_LM_HJ_Epac1_007_SCX_Phospho_F27.raw
FLEDDTpSDPTYTSALGGK	1	T(6): 0.0; S(7): 100.0; T(10): 0.0; Y(11): 0.0; T(12): 0.0; S(13): 0.0	424	P29323	Ephrin type-B receptor 2 OS=Homo sapiens GN=EPHB2 PE=1 SV=5 - [EPHB2_HUMAN]	1	P29323	S776	Ephrin type-B receptor 2 (EC 2.7.10.1) (Developmentally-regulated Eph-related tyrosine kinase) (ELK-related tyrosine kinase) (EPH tyrosine kinase 3) (EPH-like kinase 5) (EK5) (hEK5) (Renal carcinoma antigen NY-REN-47) (Tyrosine-protein kinase TYRO5) (Tyrosine-protein kinase receptor EPH-3)	EPHB2 DRT EPHT3 EPTH3 ERK HEK5 TYRO5																					Forward	Class I	fLEDDTsDPTYTSALGGk	1	N-Term(Dimethyl); S7(Phospho); K18(Dimethyl)	110	ETD	13	0	2052.91	3	684.974	0.92	131.25	9240	OR5_101221_LM_HJ_Epac1_007_SCX_Phospho_F13.raw
DRApSPAAAEEVVPEWASCLK	1	S(4): 100.0; S(17): 0.0	423	Q8N3V7	Synaptopodin OS=Homo sapiens GN=SYNPO PE=1 SV=2 - [SYNPO_HUMAN]	1	Q8N3V7	S685	Synaptopodin	SYNPO KIAA1029																					Reverse	Class I	dRAsPAAAEEVVPEWAScLk	1	N-Term(Dimethyl:2H(4)); S4(Phospho); C18(Carbamidomethyl); K20(Dimethyl:2H(4))	72	HCD	27	1	2330.14	2	1165.57	1.44	144.9	12457	20110114_LM_HJ_Epac_Rev_007_F27.raw
QVTRDYDEEEQGYDpSEK	1	T(3): 0.0; Y(6): 0.0; Y(13): 0.0; S(15): 100.0	423	Q05519	Splicing factor arginine/serine-rich 11 OS=Homo sapiens GN=SFRS11 PE=1 SV=1 - [SFR11_HUMAN]	1	Q05519	S434	Serine/arginine-rich splicing factor 11 (Arginine-rich 54 kDa nuclear protein) (p54) (Splicing factor, arginine/serine-rich 11)	SRSF11 SFRS11																					Forward	Class I	qVTRDYDEEEQGYDsEk	1	N-Term(Dimethyl); S15(Phospho); K17(Dimethyl)	73	ETD	29	1	2226.91	3	742.974	0.63	58.09	4218	OR5_101221_LM_HJ_Epac1_007_SCX_Phospho_F29.raw
LFIIRGpSPQQIDHAK	1	S(7): 100.0	423	Q92945	Far upstream element-binding protein 2 OS=Homo sapiens GN=KHSRP PE=1 SV=3 - [FUBP2_HUMAN]	1	Q92945	S480	Far upstream element-binding protein 2 (FUSE-binding protein 2) (KH type-splicing regulatory protein) (KSRP) (p75)	KHSRP FUBP2																					Reverse	Class I	lFIIRGsPQQIDHAk	1	N-Term(Dimethyl:2H(4)); S7(Phospho); K15(Dimethyl:2H(4))	73	ETD	31	1	1867.04	3	623.019	-1.25	100.69	5675	20110105_LM_HJ_Epac_Rev_007_F31.raw
ELEEEEENpSDEDELDSHTMVK	1	S(9): 100.0; S(16): 0.0; T(18): 0.0	423	Q13188	Serine/threonine-protein kinase 3 OS=Homo sapiens GN=STK3 PE=1 SV=2 - [STK3_HUMAN]	1	Q13188	S316	Serine/threonine-protein kinase 3 (EC 2.7.11.1) (Mammalian STE20-like protein kinase 2) (MST-2) (STE20-like kinase MST2) (Serine/threonine-protein kinase Krs-1) [Cleaved into: Serine/threonine-protein kinase 3 36kDa subunit (MST2/N); Serine/threonine-protein kinase 3 20kDa subunit (MST2/C)]	STK3 KRS1 MST2																					Forward	Class I	eLEEEEENsDEDELDSHTMVk	1	N-Term(Dimethyl:2H(4)); S9(Phospho); K21(Dimethyl:2H(4))	73	HCD	27	0	2651.1	3	884.373	-0.08	102.17	6645	OR5_101221_LM_HJ_Epac1_007_SCX_Phospho_F27.raw
KAEAGAGpSATEFQFR	1	S(8): 100.0; T(10): 0.0	423	P46783;Q9NQ39	40S ribosomal protein S10 OS=Homo sapiens GN=RPS10 PE=1 SV=1 - [RS10_HUMAN]|Putative 40S ribosomal protein S10-like protein OS=Homo sapiens GN=RPS10L PE=5 SV=1 - [RS10L_HUMAN]	2	P46783	S146	40S ribosomal protein S10	RPS10	Q9NQ39		Putative 40S ribosomal protein S10-like	RPS10P5 RPS10L																	Forward	Class I	kAEAGAGsATEFQFR	1	N-Term(Dimethyl:2H(4)); K1(Dimethyl:2H(4)); S8(Phospho)	99	ETD	29	1	1713.84	3	571.953	-0.43	100.11	6755	OR5_101221_LM_HJ_Epac1_007_SCX_Phospho_F29.raw
SRpSDNALNLVTER	1	S(1): 0.0; S(3): 100.0; T(11): 0.0	423	Q96MT3	Prickle-like protein 1 OS=Homo sapiens GN=PRICKLE1 PE=1 SV=2 - [PRIC1_HUMAN]	1	Q96MT3	S683	Prickle-like protein 1 (REST/NRSF-interacting LIM domain protein 1)	PRICKLE1 RILP																					Reverse	Class I	sRsDNALNLVTER	1	N-Term(Dimethyl); S3(Phospho)	87	ETD	29	1	1582.76	3	528.257	-0.71	103.2	6936	20110105_LM_HJ_Epac_Rev_007_F29_2.raw
SHSESASPSALSSSPNNLpSPTGWSQPK	1	S(1): 0.0; S(3): 0.0; S(5): 0.0; S(7): 0.0; S(9): 0.0; S(12): 0.0; S(13): 0.0; S(14): 0.0; S(19): 100.0; T(21): 0.0; S(24): 0.0	423	P04049	RAF proto-oncogene serine/threonine-protein kinase OS=Homo sapiens GN=RAF1 PE=1 SV=1 - [RAF1_HUMAN]	1	P04049	S301	RAF proto-oncogene serine/threonine-protein kinase (EC 2.7.11.1) (Proto-oncogene c-RAF) (cRaf) (Raf-1)	RAF1 RAF																					Forward	Class I	sHSESASPSALSSSPNNLsPTGWSQPk	1	N-Term(Dimethyl); S19(Phospho); K27(Dimethyl)	72	HCD	29	0	2876.31	3	959.442	0.42	110.88	7375	OR5_101221_LM_HJ_Epac1_007_SCX_Phospho_F29.raw
GPDEAMEDGEEGpSDDEAEWVVTK	1	S(13): 100.0; T(22): 0.0	423	Q9NZN4	EH domain-containing protein 2 OS=Homo sapiens GN=EHD2 PE=1 SV=2 - [EHD2_HUMAN]	1	Q9NZN4	S438	EH domain-containing protein 2 (PAST homolog 2)	EHD2 PAST2																					Forward	Class I	gPDEAMEDGEEGsDDEAEWVVTk	1	N-Term(Dimethyl); S13(Phospho); K23(Dimethyl)	79	HCD	13	0	2631.04	3	877.684	1.67	133.46	9071	OR5_101216_LM_HJ_Epac1_007_SCX_Phospho_F13.raw
GAEAFGDpSEEDGEDVFEVEK	1	S(8): 100.0	423	Q99549	M-phase phosphoprotein 8 OS=Homo sapiens GN=MPHOSPH8 PE=1 SV=2 - [MPP8_HUMAN]	1	Q99549	S51	M-phase phosphoprotein 8 (Two hybrid-associated protein 3 with RanBPM) (Twa3)	MPHOSPH8 MPP8																					Forward	Class I	gAEAFGDsEEDGEDVFEVEk	1	N-Term(Dimethyl:2H(4)); S8(Phospho); K20(Dimethyl:2H(4))	66	HCD	13	0	2302.97	3	768.329	0.15	139.62	9857	OR5_101221_LM_HJ_Epac1_007_SCX_Phospho_F13.raw
RDNSpSFDKDDNQMR	1	S(4): 0.0; S(5): 100.0	422	Q15032	R3H domain-containing protein 1 OS=Homo sapiens GN=R3HDM1 PE=1 SV=3 - [R3HD1_HUMAN]	1	Q15032	S262	R3H domain-containing protein 1	R3HDM1 KIAA0029 R3HDM																					Forward	Class I	rDNSsFDkDDNQmR	1	N-Term(Dimethyl:2H(4)); S5(Phospho); K8(Dimethyl:2H(4)); M13(Oxidation)	94	ETD	33	2	1887.81	3	629.942	-1.02	32.45	2392	OR5_101217_LM_HJ_Epac1_007_SCX_Phospho_F33.raw
SQpSPAASDCSSSSSSASLPSSGR	1	S(1): 0.4; S(3): 99.6; S(7): 0.0; S(10): 0.0; S(11): 0.0; S(12): 0.0; S(13): 0.0; S(14): 0.0; S(15): 0.0; S(17): 0.0; S(20): 0.0; S(21): 0.0	422	O95817	BAG family molecular chaperone regulator 3 OS=Homo sapiens GN=BAG3 PE=1 SV=3 - [BAG3_HUMAN]	1	O95817	S173	BAG family molecular chaperone regulator 3 (BAG-3) (Bcl-2-associated athanogene 3) (Bcl-2-binding protein Bis) (Docking protein CAIR-1)	BAG3 BIS																					Forward	Class I	sQsPAASDcSSSSSSASLPSSGR	1	N-Term(Dimethyl:2H(4)); S3(Phospho); C9(Carbamidomethyl)	68	HCD	13	0	2311.97	3	771.328	1.43	49.57	3861	OR5_101221_LM_HJ_Epac1_007_SCX_Phospho_F13.raw
GRWEpSQQDVSQTTVSR	1	S(5): 100.0; S(10): 0.0; T(12): 0.0; T(13): 0.0; S(15): 0.0	422	Q9NQT8	Kinesin-like protein KIF13B OS=Homo sapiens GN=KIF13B PE=1 SV=1 - [KI13B_HUMAN]	1	Q9NQT8	S1410	Kinesin-like protein KIF13B (Kinesin-like protein GAKIN)	KIF13B GAKIN KIAA0639																					Reverse	Class I	gRWEsQQDVSQTTVSR	1	N-Term(Dimethyl:2H(4)); S5(Phospho)	93	ETD	29	1	1975.92	3	659.31	-0.7	61.88	3905	20110105_LM_HJ_Epac_Rev_007_F29.raw
ILEGDNGMDpSDMEEEADDGSK	1	S(10): 100.0; S(20): 0.0	422	Q9H8G2	Uncharacterized protein C9orf82 OS=Homo sapiens GN=C9orf82 PE=1 SV=2 - [CI082_HUMAN]	1	Q9H8G2	S203	Caspase activity and apoptosis inhibitor 1 (Conserved anti-apoptotic protein) (CAAP)	CAAP1 C9orf82 CAAP																					Forward	Class I	iLEGDNGMDsDMEEEADDGSk	1	N-Term(Dimethyl); S10(Phospho); K21(Dimethyl)	106	HCD	13	0	2392.91	2	1196.96	0.42	103.86	7388	OR5_101221_LM_HJ_Epac1_007_SCX_Phospho_F13.raw
GSAPHSESDLPEQEEEILGpSDDDEQEDPNDYCK	1	S(2): 0.0; S(6): 0.0; S(8): 0.0; S(20): 100.0; Y(31): 0.0	422	Q96SB4	Serine/threonine-protein kinase SRPK1 OS=Homo sapiens GN=SRPK1 PE=1 SV=1 - [SRPK1_HUMAN]	1	Q96SB4	S222	SRSF protein kinase 1 (EC 2.7.11.1) (SFRS protein kinase 1) (Serine/arginine-rich protein-specific kinase 1) (SR-protein-specific kinase 1)	SRPK1																					Forward	Class I	gSAPHSESDLPEQEEEILGsDDDEQEDPNDYck	1	N-Term(Dimethyl); S20(Phospho); C32(Carbamidomethyl); K33(Dimethyl)	81	HCD	27	0	3870.54	3	1290.85	2.05	122.23	8043	OR5_101217_LM_HJ_Epac1_007_SCX_Phospho_F27.raw
HSVTAApTPPPSPTSGESGDLLSNLLQSPSSAK	1	S(2): 0.0; T(4): 0.0; T(7): 100.0; S(11): 0.0; T(13): 0.0; S(14): 0.0; S(17): 0.0; S(22): 0.0; S(27): 0.0; S(29): 0.0; S(30): 0.0	421	Q96QU8	Exportin-6 OS=Homo sapiens GN=XPO6 PE=1 SV=1 - [XPO6_HUMAN]	1	Q96QU8	T204	Exportin-6 (Exp6) (Ran-binding protein 20)	XPO6 KIAA0370 RANBP20																					Reverse	Class I	hSVTAAtPPPSPTSGESGDLLSNLLQSPSSAk	1	N-Term(Dimethyl); T7(Phospho); K32(Dimethyl)	68	HCD	27	0	3269.6	3	1090.54	1.12	146.63	12616	20110114_LM_HJ_Epac_Rev_007_F27.raw
RKApSPEPPDSAEGALK	1	S(4): 100.0; S(10): 0.0	421	Q9H1B7	Enhanced at puberty protein 1 OS=Homo sapiens GN=EAP1 PE=1 SV=1 - [EAP1_HUMAN]	1	Q9H1B7	S547	Interferon regulatory factor 2-binding protein-like (Enhanced at puberty protein 1)	IRF2BPL C14orf4 EAP1 KIAA1865 My039																					Reverse	Class I	rkAsPEPPDSAEGALk	1	N-Term(Dimethyl:2H(4)); K2(Dimethyl:2H(4)); S4(Phospho); K16(Dimethyl:2H(4))	81	ETD	33	2	1829	3	610.337	0.67	53.21	3489	20110105_LM_HJ_Epac_Rev_007_F33.raw
DGSNKpSGAEEQGPIDGPSK	1	S(3): 0.0; S(6): 100.0; S(18): 0.0	421	O43493	Trans-Golgi network integral membrane protein 2 OS=Homo sapiens GN=TGOLN2 PE=1 SV=2 - [TGON2_HUMAN]	1	O43493	S224	Trans-Golgi network integral membrane protein 2 (TGN38 homolog) (TGN46) (TGN48) (Trans-Golgi network protein TGN51)	TGOLN2 TGN46 TGN51																					Forward	Class I	dGSNksGAEEQGPIDGPSk	1	N-Term(Dimethyl); K5(Dimethyl); S6(Phospho); K19(Dimethyl)	84	ETD	26	1	2036.92	3	679.643	-0.68	48.45	3613	OR5_101217_LM_HJ_Epac1_007_SCX_Phospho_F26.raw
SQEPIPDDQKVpSDDDK	1	S(1): 0.0; S(12): 100.0	421	Q86UE4	Protein LYRIC OS=Homo sapiens GN=MTDH PE=1 SV=2 - [LYRIC_HUMAN]	1	Q86UE4	S426	Protein LYRIC (3D3/LYRIC) (Astrocyte elevated gene-1 protein) (AEG-1) (Lysine-rich CEACAM1 co-isolated protein) (Metadherin) (Metastasis adhesion protein)	MTDH AEG1 LYRIC																					Forward	Class I	sQEPIPDDQkVsDDDk	1	N-Term(Dimethyl); K10(Dimethyl); S12(Phospho); K16(Dimethyl)	76	ETD	27	1	1979.88	3	660.633	-0.74	57.76	3941	OR5_101217_LM_HJ_Epac1_007_SCX_Phospho_F27.raw
IRpTQSFpSLQER	2	T(3): 100.0; S(5): 0.0; S(7): 100.0	421	P29474	Nitric oxide synthase, endothelial OS=Homo sapiens GN=NOS3 PE=1 SV=3 - [NOS3_HUMAN]	1	P29474	T1175, S1179	Nitric oxide synthase, endothelial (EC 1.14.13.39) (Constitutive NOS) (cNOS) (EC-NOS) (Endothelial NOS) (eNOS) (NOS type III) (NOSIII)	NOS3																					Forward	Class I	iRtQSFsLQER	1	N-Term(Dimethyl:2H(4)); T3(Phospho); S7(Phospho)	64	ETD	17	1	1556.72	3	519.578	0.74	60.5	4413	OR5_101215_LM_HJ_Epac1_007_SCX_Phospho_F17.raw
TTKpSPSDSGYSYETIGK	1	T(1): 0.0; T(2): 0.0; S(4): 100.0; S(6): 0.0; S(8): 0.0; Y(10): 0.0; S(11): 0.0; Y(12): 0.0; T(14): 0.0	421	P46821	Microtubule-associated protein 1B OS=Homo sapiens GN=MAP1B PE=1 SV=1 - [MAP1B_HUMAN]	1	P46821	S1915	Microtubule-associated protein 1B (MAP-1B) [Cleaved into: MAP1 light chain LC1]	MAP1B																					Reverse	Class I	tTksPSDSGYSYETIGk	1	N-Term(Dimethyl:2H(4)); K3(Dimethyl:2H(4)); S4(Phospho); K17(Dimethyl:2H(4))	101	ETD	27	1	1996.99	3	666.335	-0.34	80.58	5513	20110105_LM_HJ_Epac_Rev_007_F27_2.raw
LQLpSDEESVFEEALMSPDTR	1	S(4): 100.0; S(8): 0.0; S(16): 0.0; T(19): 0.0	420	Q86SQ0	Pleckstrin homology-like domain family B member 2 OS=Homo sapiens GN=PHLDB2 PE=1 SV=2 - [PHLB2_HUMAN]	1	Q86SQ0	S489	Pleckstrin homology-like domain family B member 2 (Protein LL5-beta)	PHLDB2 LL5B																					Forward	Class I	lQLsDEESVFEEALmSPDTR	1	N-Term(Dimethyl:2H(4)); S4(Phospho); M15(Oxidation)	70	HCD	13	0	2424.08	3	808.698	-1.42	151.35	10342	OR5_101216_LM_HJ_Epac1_007_SCX_Phospho_F13.raw
VEMYpSGpSDDDDDFNK	2	Y(4): 0.0; S(5): 100.0; S(7): 100.0	420	O60841	Eukaryotic translation initiation factor 5B OS=Homo sapiens GN=EIF5B PE=1 SV=3 - [IF2P_HUMAN]	1	O60841	S135, S137	Eukaryotic translation initiation factor 5B (eIF-5B) (Translation initiation factor IF-2)	EIF5B IF2 KIAA0741																					Reverse	Class I	vEmYsGsDDDDDFNk	1	N-Term(Dimethyl); M3(Oxidation); S5(Phospho); S7(Phospho); K15(Dimethyl)	74	ETD	7	0	1968.65	3	656.888	0.55	55.14	3848	20110105_LM_HJ_Epac_Rev_007_F7.raw
DTSATSQSVNGpSPQAEQPSLESTSK	1	T(2): 0.0; S(3): 0.0; T(5): 0.0; S(6): 0.0; S(8): 0.0; S(12): 100.0; S(19): 0.0; S(22): 0.0; T(23): 0.0; S(24): 0.0	420	Q86WB0	Nuclear-interacting partner of ALK OS=Homo sapiens GN=ZC3HC1 PE=1 SV=1 - [NIPA_HUMAN]	1	Q86WB0	S62	Nuclear-interacting partner of ALK (Nuclear-interacting partner of anaplastic lymphoma kinase) (hNIPA) (Zinc finger C3HC-type protein 1)	ZC3HC1 NIPA HSPC216																					Reverse	Class I	dTSATSQSVNGsPQAEQPSLESTSk	1	N-Term(Dimethyl:2H(4)); S12(Phospho); K25(Dimethyl:2H(4))	91	HCD	13	0	2680.25	3	894.087	1.18	68.22	4967	20110105_LM_HJ_Epac_Rev_007_F13.raw
YSpSTETLKDDDLWSSR	1	Y(1): 0.0; S(2): 0.0; S(3): 100.0; T(4): 0.0; T(6): 0.0; S(14): 0.0; S(15): 0.0	420	Q96PE2	Rho guanine nucleotide exchange factor 17 OS=Homo sapiens GN=ARHGEF17 PE=1 SV=1 - [ARHGH_HUMAN]	1	Q96PE2	S395	Rho guanine nucleotide exchange factor 17 (164 kDa Rho-specific guanine-nucleotide exchange factor) (p164-RhoGEF) (p164RhoGEF) (Tumor endothelial marker 4)	ARHGEF17 KIAA0337 TEM4																					Forward	Class I	ySsTETLkDDDLWSSR	1	N-Term(Dimethyl); S3(Phospho); K8(Dimethyl)	99	ETD	27	1	2038.9	3	680.306	1.45	122.49	8060	OR5_101217_LM_HJ_Epac1_007_SCX_Phospho_F27.raw
SDpSRAQAVSEDAGGNEGR	1	S(1): 0.1; S(3): 99.9; S(9): 0.0	419	P55884	Eukaryotic translation initiation factor 3 subunit B OS=Homo sapiens GN=EIF3B PE=1 SV=2 - [EIF3B_HUMAN]	1	P55884	S119	Eukaryotic translation initiation factor 3 subunit B (eIF3b) (Eukaryotic translation initiation factor 3 subunit 9) (Prt1 homolog) (hPrt1) (eIF-3-eta) (eIF3 p110) (eIF3 p116)	EIF3B EIF3S9																					Forward	Class I	sDsRAQAVSEDAGGNEGR	1	N-Term(Dimethyl:2H(4)); S3(Phospho)	114	ETD	27	1	1917.82	3	639.946	-0.16	39.2	2672	OR5_101221_LM_HJ_Epac1_007_SCX_Phospho_F27.raw
LRSADpSENALSVQER	1	S(3): 0.0; S(6): 100.0; S(11): 0.0	419	Q99759	Mitogen-activated protein kinase kinase kinase 3 OS=Homo sapiens GN=MAP3K3 PE=1 SV=2 - [M3K3_HUMAN]	1	Q99759	S340	Mitogen-activated protein kinase kinase kinase 3 (EC 2.7.11.25) (MAPK/ERK kinase kinase 3) (MEK kinase 3) (MEKK 3)	MAP3K3 MAPKKK3 MEKK3																					Forward	Class I	lRSADsENALSVQER	1	N-Term(Dimethyl); S6(Phospho)	103	ETD	29	1	1782.84	3	594.951	0.08	70.69	5012	OR5_101221_LM_HJ_Epac1_007_SCX_Phospho_F29.raw
FLQEHGSDpSFLAEHK	1	S(7): 1.8; S(9): 98.2	419	Q00688	FK506-binding protein 3 OS=Homo sapiens GN=FKBP3 PE=1 SV=1 - [FKBP3_HUMAN]	1	Q00688	S36	Peptidyl-prolyl cis-trans isomerase FKBP3 (PPIase FKBP3) (EC 5.2.1.8) (25 kDa FK506-binding protein) (25 kDa FKBP) (FKBP-25) (FK506-binding protein 3) (FKBP-3) (Immunophilin FKBP25) (Rapamycin-selective 25 kDa immunophilin) (Rotamase)	FKBP3 FKBP25																					Forward	Class I	fLQEHGSDsFLAEHk	1	N-Term(Dimethyl:2H(4)); S9(Phospho); K15(Dimethyl:2H(4))	88	ETD	31	0	1888.91	3	630.308	0.18	96.37	5870	OR5_101221_LM_HJ_Epac1_007_SCX_Phospho_F31.raw
HLGGSGSVVPGpSPCLDR	1	S(5): 0.0; S(7): 0.0; S(12): 100.0	419	Q9HBL0	Tensin-1 OS=Homo sapiens GN=TNS1 PE=1 SV=1 - [TENS1_HUMAN]	1	Q9HBL0	S1314	Tensin-1	TNS1 TNS																					Forward	Class I	hLGGSGSVVPGsPcLDR	1	N-Term(Dimethyl:2H(4)); S12(Phospho); C14(Carbamidomethyl)	89	ETD	29	0	1806.85	3	602.956	1.2	93.55	6364	OR5_101221_LM_HJ_Epac1_007_SCX_Phospho_F29.raw
SVKHDSIPAADTFEDLpSDVEGGGSEPTQR	1	S(1): 0.0; S(6): 0.0; T(12): 0.0; S(17): 100.0; S(24): 0.0; T(27): 0.0	419	O95671	N-acetylserotonin O-methyltransferase-like protein OS=Homo sapiens GN=ASMTL PE=1 SV=3 - [ASML_HUMAN]	1	O95671	S239	N-acetylserotonin O-methyltransferase-like protein (ASMTL)	ASMTL																					Reverse	Class I	sVkHDSIPAADTFEDLsDVEGGGSEPTQR	1	N-Term(Dimethyl); K3(Dimethyl); S17(Phospho)	88	HCD	32	1	3180.44	3	1060.82	0.41	120.94	7035	20110105_LM_HJ_Epac_Rev_007_F32.raw
ITVNGDpSSAEAEELANEI	1	T(2): 0.0; S(7): 100.0; S(8): 0.0	419	Q9BXJ9	NMDA receptor-regulated protein 1 OS=Homo sapiens GN=NARG1 PE=1 SV=1 - [NARG1_HUMAN]	1	Q9BXJ9	S855	N-alpha-acetyltransferase 15, NatA auxiliary subunit (Gastric cancer antigen Ga19) (N-terminal acetyltransferase) (NMDA receptor-regulated protein 1) (Protein tubedown-1) (Tbdn100)	NAA15 GA19 NARG1 NATH TBDN100																					Forward	Class I	iTVNGDsSAEAEELANEI	1	N-Term(Dimethyl:2H(4)); S7(Phospho)	123	ETD	1-3	0	1973.89	3	658.635	0.75	91.11	7223	OR5_101215_LM_HJ_Epac1_007_SCX_Phospho_F1_F3.raw
QApSEQNWANYSAEQNR	1	S(3): 100.0; Y(10): 0.0; S(11): 0.0	419	P17302	Gap junction alpha-1 protein OS=Homo sapiens GN=GJA1 PE=1 SV=2 - [CXA1_HUMAN]	1	P17302	S306	Gap junction alpha-1 protein (Connexin-43) (Cx43) (Gap junction 43 kDa heart protein)	GJA1 GJAL																					Forward	Class I	qAsEQNWANYSAEQNR	1	N-Term(Dimethyl:2H(4)); S3(Phospho)	69	ETD	14	0	2007.85	3	669.954	-0.5	92.66	8083	OR5_101215_LM_HJ_Epac1_007_SCX_Phospho_F14.raw
RSYpSLSELSVLQAK	1	S(2): 0.0; Y(3): 0.0; S(4): 100.0; S(6): 0.0; S(9): 0.0	419	Q9P0V3	SH3 domain-binding protein 4 OS=Homo sapiens GN=SH3BP4 PE=1 SV=1 - [SH3B4_HUMAN]	1	Q9P0V3	S246	SH3 domain-binding protein 4 (EH-binding protein 10) (Transferrin receptor-trafficking protein)	SH3BP4 BOG25 EHB10 TTP																					Reverse	Class I	rSYsLSELSVLQAk	1	N-Term(Dimethyl); S4(Phospho); K14(Dimethyl)	78	ETD	28	1	1716.89	3	572.969	-0.89	137.19	8889	20110105_LM_HJ_Epac_Rev_007_F28_2.raw
TEpSPATAAETASEELDNR	1	T(1): 0.0; S(3): 100.0; T(6): 0.0; T(10): 0.0; S(12): 0.0	419	Q9NTJ3	Structural maintenance of chromosomes protein 4 OS=Homo sapiens GN=SMC4 PE=1 SV=2 - [SMC4_HUMAN]	1	Q9NTJ3	S41	Structural maintenance of chromosomes protein 4 (SMC protein 4) (SMC-4) (Chromosome-associated polypeptide C) (hCAP-C) (XCAP-C homolog)	SMC4 CAPC SMC4L1																					Forward	Class I	tEsPATAAETASEELDNR	1	N-Term(Dimethyl:2H(4)); S3(Phospho)	104	ETD	13	0	2003.87	3	668.63	-0.02	128.73	9054	OR5_101221_LM_HJ_Epac1_007_SCX_Phospho_F13.raw
SYpSSPDITQAIQEEEK	1	S(1): 0.0; Y(2): 0.0; S(3): 100.0; S(4): 0.0; T(8): 0.0	419	P40818	Ubiquitin carboxyl-terminal hydrolase 8 OS=Homo sapiens GN=USP8 PE=1 SV=1 - [UBP8_HUMAN]	1	P40818	S718	Ubiquitin carboxyl-terminal hydrolase 8 (EC 3.4.19.12) (Deubiquitinating enzyme 8) (Ubiquitin isopeptidase Y) (hUBPy) (Ubiquitin thioesterase 8) (Ubiquitin-specific-processing protease 8)	USP8 KIAA0055 UBPY																					Forward	Class I	sYsSPDITQAIQEEEk	1	N-Term(Dimethyl:2H(4)); S3(Phospho); K16(Dimethyl:2H(4))	82	ETD	13	0	1968.93	3	656.982	0.78	134.96	9179	OR5_101216_LM_HJ_Epac1_007_SCX_Phospho_F13.raw
TEDGGWEWpSDDEFDEESEEGK	1	T(1): 0.0; S(9): 100.0; S(17): 0.0	418	O95747	Serine/threonine-protein kinase OSR1 OS=Homo sapiens GN=OXSR1 PE=1 SV=1 - [OXSR1_HUMAN]	1	O95747	S339	Serine/threonine-protein kinase OSR1 (EC 2.7.11.1) (Oxidative stress-responsive 1 protein)	OXSR1 KIAA1101 OSR1																					Forward	Class I	tEDGGWEWsDDEFDEESEEGk	1	N-Term(Dimethyl:2H(4)); S9(Phospho); K21(Dimethyl:2H(4))	73	HCD	13	0	2620	3	874.005	-0.55	142.41	10061	OR5_101221_LM_HJ_Epac1_007_SCX_Phospho_F13.raw
GLFpSDEEDSEDLFSSQSASK	1	S(4): 100.0; S(9): 0.0; S(14): 0.0; S(15): 0.0; S(17): 0.0; S(19): 0.0	418	Q641Q2;Q5SNT6	Protein FAM21A OS=Homo sapiens GN=FAM21A PE=1 SV=3 - [FA21A_HUMAN]|Protein FAM21B OS=Homo sapiens GN=FAM21B PE=1 SV=2 - [FA21B_HUMAN]	2	Q641Q2	S539	WASH complex subunit FAM21A	FAM21A	Q5SNT6	S451	WASH complex subunit FAM21B	FAM21B																	Reverse	Class I	gLFsDEEDSEDLFSSQSASk	1	N-Term(Dimethyl); S4(Phospho); K20(Dimethyl)	118	HCD	13	0	2313.97	2	1157.49	1.66	147.61	12000	20110114_LM_HJ_Epac_Rev_007_F13.raw
AQLGGPEAAKpSDETAAK	1	S(11): 100.0; T(14): 0.0	418	P04792	Heat shock protein beta-1 OS=Homo sapiens GN=HSPB1 PE=1 SV=2 - [HSPB1_HUMAN]	1	P04792	S199	Heat shock protein beta-1 (HspB1) (28 kDa heat shock protein) (Estrogen-regulated 24 kDa protein) (Heat shock 27 kDa protein) (HSP 27) (Stress-responsive protein 27) (SRP27)	HSPB1 HSP27 HSP28																					Forward	Class I	aQLGGPEAAksDETAAk	1	N-Term(Dimethyl); K10(Dimethyl); S11(Phospho); K17(Dimethyl)	83	ETD	27	1	1807.88	3	603.299	-0.55	50.01	3425	OR5_101217_LM_HJ_Epac1_007_SCX_Phospho_F27.raw
SINEENGEVpSEDQSQNK	1	S(1): 0.0; S(10): 100.0; S(14): 0.0	418	Q13523	Serine/threonine-protein kinase PRP4 homolog OS=Homo sapiens GN=PRPF4B PE=1 SV=2 - [PRP4B_HUMAN]	1	Q13523	S32	Serine/threonine-protein kinase PRP4 homolog (EC 2.7.11.1) (PRP4 kinase) (PRP4 pre-mRNA-processing factor 4 homolog)	PRPF4B KIAA0536 PRP4 PRP4H PRP4K																					Forward	Class I	sINEENGEVsEDQSQNk	1	N-Term(Dimethyl:2H(4)); S10(Phospho); K17(Dimethyl:2H(4))	89	ETD	14	0	2050.9	3	684.306	-1.13	49.62	4076	OR5_101215_LM_HJ_Epac1_007_SCX_Phospho_F14.raw
NFYEpSDDDQKEK	1	Y(3): 0.0; S(5): 100.0	418	O00203	AP-3 complex subunit beta-1 OS=Homo sapiens GN=AP3B1 PE=1 SV=2 - [AP3B1_HUMAN]	1	O00203	S276	AP-3 complex subunit beta-1 (Adapter-related protein complex 3 subunit beta-1) (Adaptor protein complex AP-3 subunit beta-1) (Beta-3A-adaptin) (Clathrin assembly protein complex 3 beta-1 large chain)	AP3B1 ADTB3A																					Forward	Class I	nFYEsDDDQkEk	1	N-Term(Dimethyl); S5(Phospho); K10(Dimethyl); K12(Dimethyl)	76	ETD	28	1	1681.7	3	561.238	0.78	57.29	4088	OR5_101221_LM_HJ_Epac1_007_SCX_Phospho_F28.raw
AETSEGSGSAPAVPEASApSPK	1	T(3): 0.0; S(4): 0.0; S(7): 0.0; S(9): 0.0; S(17): 0.0; S(19): 100.0	418	P51608	Methyl-CpG-binding protein 2 OS=Homo sapiens GN=MECP2 PE=1 SV=1 - [MECP2_HUMAN]	1	P51608	S80	Methyl-CpG-binding protein 2 (MeCp-2 protein) (MeCp2)	MECP2																					Forward	Class I	aETSEGSGSAPAVPEASAsPk	1	N-Term(Dimethyl:2H(4)); S19(Phospho); K21(Dimethyl:2H(4))	107	ETD	14	0	2073.98	3	692	0.54	61.17	4455	OR5_101221_LM_HJ_Epac1_007_SCX_Phospho_F14.raw
LQGVGALGQAASDNpSGPEDAK	1	S(12): 0.0; S(15): 100.0	418	P69849	Nodal modulator 3 OS=Homo sapiens GN=NOMO3 PE=2 SV=1 - [NOMO3_HUMAN]	1	P69849	S1205	Nodal modulator 3 (pM5 protein 3)	NOMO3																					Forward	Class I	lQGVGALGQAASDNsGPEDAk	1	N-Term(Dimethyl); S15(Phospho); K21(Dimethyl)	97	ETD	14	0	2121	3	707.67	4.65	102.37	7556	OR5_101221_LM_HJ_Epac1_007_SCX_Phospho_F14.raw
HGSGPNIILTGDSpSPGFSK	1	S(3): 0.0; T(10): 0.0; S(13): 0.0; S(14): 100.0; S(18): 0.0	418	Q53ET0	CREB-regulated transcription coactivator 2 OS=Homo sapiens GN=CRTC2 PE=1 SV=2 - [CRTC2_HUMAN]	1	Q53ET0	S624	CREB-regulated transcription coactivator 2 (Transducer of regulated cAMP response element-binding protein 2) (TORC-2) (Transducer of CREB protein 2)	CRTC2 TORC2																					Forward	Class I	hGSGPNIILTGDSsPGFSk	1	N-Term(Dimethyl:2H(4)); S14(Phospho); K19(Dimethyl:2H(4))	109	ETD	29	0	2015.01	3	672.342	1.2	119.27	7862	OR5_101221_LM_HJ_Epac1_007_SCX_Phospho_F29.raw
KLGDVpSPTQIDVSQFGSFK	1	S(6): 100.0; T(8): 0.0; S(13): 0.0; S(17): 0.0	418	P46821	Microtubule-associated protein 1B OS=Homo sapiens GN=MAP1B PE=1 SV=1 - [MAP1B_HUMAN]	1	P46821	S1501	Microtubule-associated protein 1B (MAP-1B) [Cleaved into: MAP1 light chain LC1]	MAP1B																					Reverse	Class I	kLGDVsPTQIDVSQFGSFk	1	N-Term(Dimethyl); K1(Dimethyl); S6(Phospho); K19(Dimethyl)	84	ETD	28	1	2217.11	3	739.709	-3.18	140.6	9127	20110105_LM_HJ_Epac_Rev_007_F28_2.raw
GDLpSDVEEEEEEEMDVDEATGAVKK	1	S(4): 100.0; T(20): 0.0	418	Q96ST3	Paired amphipathic helix protein Sin3a OS=Homo sapiens GN=SIN3A PE=1 SV=2 - [SIN3A_HUMAN]	1	Q96ST3	S832	Paired amphipathic helix protein Sin3a (Histone deacetylase complex subunit Sin3a) (Transcriptional corepressor Sin3a)	SIN3A																					Forward	Class I	gDLsDVEEEEEEEMDVDEATGAVkk	1	N-Term(Dimethyl); S4(Phospho); K24(Dimethyl); K25(Dimethyl)	65	HCD	26	1	2917.24	3	973.086	0.41	139.1	9752	OR5_101217_LM_HJ_Epac1_007_SCX_Phospho_F26.raw
IEDVGpSDEEDDSGKDKK	1	S(6): 100.0; S(12): 0.0	417	Q58FF8;P08238	Putative heat shock protein HSP 90-beta 2 OS=Homo sapiens GN=HSP90AB2P PE=1 SV=2 - [H90B2_HUMAN]|Heat shock protein HSP 90-beta OS=Homo sapiens GN=HSP90AB1 PE=1 SV=4 - [HS90B_HUMAN]	2	Q58FF8	S177	Putative heat shock protein HSP 90-beta 2 (Heat shock protein 90-beta b) (Heat shock protein 90Bb)	HSP90AB2P HSP90BB	P08238	S255	Heat shock protein HSP 90-beta (HSP 90) (Heat shock 84 kDa) (HSP 84) (HSP84)	HSP90AB1 HSP90B HSPC2 HSPCB																	Reverse	Class I	iEDVGsDEEDDSGkDkk	1	N-Term(Dimethyl); S6(Phospho); K14(Dimethyl); K16(Dimethyl); K17(Dimethyl)	84	ETD	31	2	2057.91	3	686.642	-2.77	33.91	2214	20110105_LM_HJ_Epac_Rev_007_F31.raw
AEEEHLSSpSGGLAK	1	S(7): 0.0; S(8): 0.0; S(9): 100.0	417	Q52LW3	Rho GTPase-activating protein 29 OS=Homo sapiens GN=ARHGAP29 PE=1 SV=2 - [RHG29_HUMAN]	1	Q52LW3	S357	Rho GTPase-activating protein 29 (PTPL1-associated RhoGAP protein 1) (Rho-type GTPase-activating protein 29)	ARHGAP29 PARG1																					Reverse	Class I	aEEEHLSSsGGLAk	1	N-Term(Dimethyl); S9(Phospho); K14(Dimethyl)	94	ETD	28	0	1550.71	3	517.575	-0.31	52.19	3743	20110105_LM_HJ_Epac_Rev_007_F28.raw
EKTEpSELKFEEDER	1	T(3): 0.0; S(5): 100.0	417	O94854	Uncharacterized protein KIAA0754 OS=Homo sapiens GN=KIAA0754 PE=1 SV=3 - [K0754_HUMAN]	1	O94854	S181	Uncharacterized protein KIAA0754	KIAA0754																					Reverse	Class I	ekTEsELkFEEDER	1	N-Term(Dimethyl); K2(Dimethyl); S5(Phospho); K8(Dimethyl)	62	ETD	32	2	1932.88	3	644.966	0.44	64.59	4136	20110105_LM_HJ_Epac_Rev_007_F32.raw
SQpSFAGVLGSHER	1	S(1): 0.0; S(3): 100.0; S(10): 0.0	417	Q6ZS17	Protein FAM65A OS=Homo sapiens GN=FAM65A PE=1 SV=1 - [FA65A_HUMAN]	1	Q6ZS17	S22	Protein FAM65A	FAM65A KIAA1930																					Forward	Class I	sQsFAGVLGSHER	1	N-Term(Dimethyl:2H(4)); S3(Phospho)	83	ETD	29	0	1486.7	3	496.238	0.42	105.59	7070	OR5_101221_LM_HJ_Epac1_007_SCX_Phospho_F29.raw
GLFpSDEEDSEDLFSSQSASNLK	1	S(4): 100.0; S(9): 0.0; S(14): 0.0; S(15): 0.0; S(17): 0.0; S(19): 0.0	417	Q9Y4E1	Protein FAM21C OS=Homo sapiens GN=FAM21C PE=1 SV=2 - [FA21C_HUMAN]	1	Q9Y4E1	S539	WASH complex subunit FAM21C (Vaccinia virus penetration factor) (VPEF)	FAM21C KIAA0592																					Reverse	Class I	gLFsDEEDSEDLFSSQSASNLk	1	N-Term(Dimethyl); S4(Phospho); K22(Dimethyl)	105	HCD	12	0	2541.09	2	1271.05	0.43	92.04	7152	20110105_LM_HJ_Epac_Rev_007_F12.raw
SApTPVNCEQPDILVSSTPINEGQTVLDK	1	S(1): 0.6; T(3): 99.4; S(15): 0.0; S(16): 0.0; T(17): 0.0; T(24): 0.0	417	P82094	TATA element modulatory factor OS=Homo sapiens GN=TMF1 PE=1 SV=1 - [TMF1_HUMAN]	1	P82094	T401	TATA element modulatory factor (TMF) (Androgen receptor coactivator 160 kDa protein) (Androgen receptor-associated protein of 160 kDa)	TMF1 ARA160																					Forward	Class I	sAtPVNcEQPDILVSSTPINEGQTVLDk	1	N-Term(Dimethyl); T3(Phospho); C7(Carbamidomethyl); K28(Dimethyl)	58	HCD	13	0	3148.52	3	1050.18	2.32	141.07	9619	OR5_101216_LM_HJ_Epac1_007_SCX_Phospho_F13.raw
RPMEEDGEEKpSPSK	1	S(11): 100.0; S(13): 0.0	416	Q12906	Interleukin enhancer-binding factor 3 OS=Homo sapiens GN=ILF3 PE=1 SV=3 - [ILF3_HUMAN]	1	Q12906	S382	Interleukin enhancer-binding factor 3 (Double-stranded RNA-binding protein 76) (DRBP76) (M-phase phosphoprotein 4) (MPP4) (Nuclear factor associated with dsRNA) (NFAR) (Nuclear factor of activated T-cells 90 kDa) (NF-AT-90) (Translational control protein 80) (TCP80)	ILF3 DRBF MPHOSPH4 NF90																					Reverse	Class I	rPmEEDGEEksPSk	1	N-Term(Dimethyl); M3(Oxidation); K10(Dimethyl); S11(Phospho); K14(Dimethyl)	69	ETD	33	1	1798.79	3	600.27	0.7	27.69	1929	20110114_LM_HJ_Epac_Rev_007_F33.raw
NSSTDQGpSDEEGSLQK	1	S(2): 0.0; S(3): 0.0; T(4): 0.0; S(8): 100.0; S(13): 0.0	416	Q12789	General transcription factor 3C polypeptide 1 OS=Homo sapiens GN=GTF3C1 PE=1 SV=3 - [TF3C1_HUMAN]	1	Q12789	S1068	General transcription factor 3C polypeptide 1 (TF3C-alpha) (TFIIIC box B-binding subunit) (Transcription factor IIIC 220 kDa subunit) (TFIIIC 220 kDa subunit) (TFIIIC220) (Transcription factor IIIC subunit alpha)	GTF3C1																					Forward	Class I	nSSTDQGsDEEGSLQk	1	N-Term(Dimethyl); S8(Phospho); K16(Dimethyl)	95	ETD	14	0	1817.75	3	606.587	1.04	43.91	3562	OR5_101215_LM_HJ_Epac1_007_SCX_Phospho_F14.raw
NRPTpSISWDGLDSGK	1	T(4): 0.0; S(5): 100.0; S(7): 0.0; S(13): 0.0	416	P30086	Phosphatidylethanolamine-binding protein 1 OS=Homo sapiens GN=PEBP1 PE=1 SV=3 - [PEBP1_HUMAN]	1	P30086	S52	Phosphatidylethanolamine-binding protein 1 (PEBP-1) (HCNPpp) (Neuropolypeptide h3) (Prostatic-binding protein) (Raf kinase inhibitor protein) (RKIP) [Cleaved into: Hippocampal cholinergic neurostimulating peptide (HCNP)]	PEBP1 PBP PEBP																					Reverse	Class I	nRPTsISWDGLDSGk	1	N-Term(Dimethyl:2H(4)); S5(Phospho); K15(Dimethyl:2H(4))	106	ETD	28	0	1776.86	3	592.958	-9.78	119.87	7813	20110105_LM_HJ_Epac_Rev_007_F28.raw
RApSQEANLLTLAQK	1	S(3): 100.0; T(10): 0.0	416	Q6PJG2	Uncharacterized protein C14orf43 OS=Homo sapiens GN=C14orf43 PE=1 SV=2 - [CN043_HUMAN]	1	Q6PJG2	S461	Uncharacterized protein C14orf43	C14orf43 C14orf117																					Forward	Class I	rAsQEANLLTLAQk	1	N-Term(Dimethyl:2H(4)); S3(Phospho); K14(Dimethyl:2H(4))	84	ETD	28	1	1686.94	3	562.985	0.48	122.47	8341	OR5_101221_LM_HJ_Epac1_007_SCX_Phospho_F28.raw
LLESSLSpSSEGEEPVEYK	1	S(4): 0.0; S(5): 0.0; S(7): 0.0; S(8): 100.0; S(9): 0.0; Y(17): 0.0	416	P08648	Integrin alpha-5 OS=Homo sapiens GN=ITGA5 PE=1 SV=2 - [ITA5_HUMAN]	1	P08648	S127	Integrin alpha-5 (CD49 antigen-like family member E) (Fibronectin receptor subunit alpha) (Integrin alpha-F) (VLA-5) (CD antigen CD49e) [Cleaved into: Integrin alpha-5 heavy chain; Integrin alpha-5 light chain]	ITGA5 FNRA																					Forward	Class I	lLESSLSsSEGEEPVEYk	1	N-Term(Dimethyl:2H(4)); S8(Phospho); K18(Dimethyl:2H(4))	94	ETD	14	0	2127.02	3	709.68	0.66	114.24	8383	OR5_101221_LM_HJ_Epac1_007_SCX_Phospho_F14.raw
VQVAALQApSPPLDQDDR	1	S(9): 100.0	416	Q9UDY2	Tight junction protein ZO-2 OS=Homo sapiens GN=TJP2 PE=1 SV=1 - [ZO2_HUMAN]	1	Q9UDY2	S130	Tight junction protein ZO-2 (Tight junction protein 2) (Zona occludens protein 2) (Zonula occludens protein 2)	TJP2 X104 ZO2																					Forward	Class I	vQVAALQAsPPLDQDDR	1	N-Term(Dimethyl:2H(4)); S9(Phospho)	82	ETD	14	0	1934.95	3	645.656	0.84	115.72	8480	OR5_101221_LM_HJ_Epac1_007_SCX_Phospho_F14.raw
QGSRQDpSWEVVEGLR	1	S(3): 0.0; S(7): 100.0	416	Q9H4L5	Oxysterol-binding protein-related protein 3 OS=Homo sapiens GN=OSBPL3 PE=1 SV=1 - [OSBL3_HUMAN]	1	Q9H4L5	S34	Oxysterol-binding protein-related protein 3 (ORP-3) (OSBP-related protein 3)	OSBPL3 KIAA0704 ORP3 OSBP3																					Forward	Class I	qGSRQDsWEVVEGLR	1	N-Term(Dimethyl:2H(4)); S7(Phospho)	60	ETD	29	1	1857.88	3	619.966	2.11	127.79	8577	OR5_101217_LM_HJ_Epac1_007_SCX_Phospho_F29.raw
SLEEDLETLKpSLEK	1	S(1): 0.0; T(8): 0.0; S(11): 100.0	416	P48681	Nestin OS=Homo sapiens GN=NES PE=1 SV=2 - [NEST_HUMAN]	1	P48681	S588	Nestin	NES Nbla00170																					Forward	Class I	sLEEDLETLksLEk	1	N-Term(Dimethyl); K10(Dimethyl); S11(Phospho); K14(Dimethyl)	78	ETD	27	1	1797.93	3	599.983	10.95	145.43	9589	OR5_101217_LM_HJ_Epac1_007_SCX_Phospho_F27.raw
TSASEGNPYVSSTLSVPApSPR	1	T(1): 0.0; S(2): 0.0; S(4): 0.0; Y(9): 0.0; S(11): 0.0; S(12): 0.0; T(13): 0.0; S(15): 0.0; S(19): 100.0	416	Q86SQ0	Pleckstrin homology-like domain family B member 2 OS=Homo sapiens GN=PHLDB2 PE=1 SV=2 - [PHLB2_HUMAN]	1	Q86SQ0	S334	Pleckstrin homology-like domain family B member 2 (Protein LL5-beta)	PHLDB2 LL5B																					Forward	Class I	tSASEGNPYVSSTLSVPAsPR	1	N-Term(Dimethyl:2H(4)); S19(Phospho)	100	ETD	14	0	2219.05	3	740.356	0.13	112.88	9746	OR5_101215_LM_HJ_Epac1_007_SCX_Phospho_F14.raw
KLEGNSPQGpSNQGVK	1	S(6): 0.0; S(10): 100.0	415	P61006	Ras-related protein Rab-8A OS=Homo sapiens GN=RAB8A PE=1 SV=1 - [RAB8A_HUMAN]	1	P61006	S185	Ras-related protein Rab-8A (Oncogene c-mel)	RAB8A MEL RAB8																					Reverse	Class I	kLEGNSPQGsNQGVk	1	N-Term(Dimethyl); K1(Dimethyl); S10(Phospho); K15(Dimethyl)	77	ETD	29	1	1706.85	3	569.621	0.37	30.8	2294	20110105_LM_HJ_Epac_Rev_007_F29_2.raw
SHWDDSTpSDSELEK	1	S(1): 0.0; S(6): 0.0; T(7): 0.0; S(8): 100.0; S(10): 0.0	415	P78559	Microtubule-associated protein 1A OS=Homo sapiens GN=MAP1A PE=1 SV=5 - [MAP1A_HUMAN]	1	P78559	S2106	Microtubule-associated protein 1A (MAP-1A) (Proliferation-related protein p80) [Cleaved into: MAP1 light chain LC2]	MAP1A MAP1L																					Reverse	Class I	sHWDDSTsDSELEk	1	N-Term(Dimethyl); S8(Phospho); K14(Dimethyl)	81	ETD	29	0	1771.7	3	591.24	-0.58	68.61	4266	20110105_LM_HJ_Epac_Rev_007_F29.raw
NHSDSSTSESEVSSVpSPLK	1	S(3): 0.0; S(5): 0.0; S(6): 0.0; T(7): 0.0; S(8): 0.0; S(10): 0.0; S(13): 0.0; S(14): 0.0; S(16): 100.0	415	Q9NY27	Serine/threonine-protein phosphatase 4 regulatory subunit 2 OS=Homo sapiens GN=PPP4R2 PE=1 SV=3 - [PP4R2_HUMAN]	1	Q9NY27	S226	Serine/threonine-protein phosphatase 4 regulatory subunit 2	PPP4R2 SBBI57																					Forward	Class I	nHSDSSTSESEVSSVsPLk	1	N-Term(Dimethyl); S16(Phospho); K19(Dimethyl)	97	ETD	29	0	2112.94	3	704.984	2.13	69.8	4960	OR5_101221_LM_HJ_Epac1_007_SCX_Phospho_F29.raw
SYRpSVGGSGGGSFGDNLVTR	1	S(1): 0.0; Y(2): 0.0; S(4): 100.0; S(8): 0.0; S(12): 0.0; T(19): 0.0	415	P02545	Lamin-A/C OS=Homo sapiens GN=LMNA PE=1 SV=1 - [LMNA_HUMAN]	1	P02545	S628	Prelamin-A/C [Cleaved into: Lamin-A/C (70 kDa lamin) (Renal carcinoma antigen NY-REN-32)]	LMNA LMN1																					Forward	Class I	sYRsVGGSGGGSFGDNLVTR	1	N-Term(Dimethyl:2H(4)); S4(Phospho)	118	ETD	28	1	2084.97	3	695.662	0.08	102.4	7059	OR5_101221_LM_HJ_Epac1_007_SCX_Phospho_F28.raw
VLNTGpSDVEEAVADALK	1	T(4): 0.0; S(6): 100.0	414	O75122	CLIP-associating protein 2 OS=Homo sapiens GN=CLASP2 PE=1 SV=2 - [CLAP2_HUMAN]	1	O75122	S596	CLIP-associating protein 2 (Cytoplasmic linker-associated protein 2) (Protein Orbit homolog 2) (hOrbit2)	CLASP2 KIAA0627																					Forward	Class I	vLNTGsDVEEAVADALk	1	N-Term(Dimethyl); S6(Phospho); K17(Dimethyl)	83	ETD	13	0	1866.91	3	622.976	2.02	150.71	10296	OR5_101216_LM_HJ_Epac1_007_SCX_Phospho_F13.raw
TpSDANETEDHLESLICK	1	T(1): 2.6; S(2): 97.4; T(7): 0.0; S(13): 0.0	414	Q09161	Nuclear cap-binding protein subunit 1 OS=Homo sapiens GN=NCBP1 PE=1 SV=1 - [NCBP1_HUMAN]	1	Q09161	S22	Nuclear cap-binding protein subunit 1 (80 kDa nuclear cap-binding protein) (CBP80) (NCBP 80 kDa subunit)	NCBP1 CBP80 NCBP																					Reverse	Class I	tsDANETEDHLESLIck	1	N-Term(Dimethyl:2H(4)); S2(Phospho); C16(Carbamidomethyl); K17(Dimethyl:2H(4))	89	ETD	27	0	2105.97	3	702.66	5.32	139.58	11921	20110114_LM_HJ_Epac_Rev_007_F27.raw
SQSSDTEQQpSPTSGGGK	1	S(1): 0.0; S(3): 0.0; S(4): 0.0; T(6): 0.0; S(10): 100.0; T(12): 0.0; S(13): 0.0	414	P23588	Eukaryotic translation initiation factor 4B OS=Homo sapiens GN=EIF4B PE=1 SV=2 - [IF4B_HUMAN]	1	P23588	S504	Eukaryotic translation initiation factor 4B (eIF-4B)	EIF4B																					Reverse	Class I	sQSSDTEQQsPTSGGGk	1	N-Term(Dimethyl); S10(Phospho); K17(Dimethyl)	97	ETD	14	0	1816.76	3	606.259	0.75	25.48	1900	20110105_LM_HJ_Epac_Rev_007_F14.raw
ARLGEApSDSELADADK	1	S(7): 100.0; S(9): 0.0	414	Q5SW79	Centrosomal protein of 170 kDa OS=Homo sapiens GN=CEP170 PE=1 SV=1 - [CE170_HUMAN]	1	Q5SW79	S1112	Centrosomal protein of 170 kDa (Cep170) (KARP-1-binding protein) (KARP1-binding protein)	CEP170 FAM68A KAB KIAA0470																					Forward	Class I	aRLGEAsDSELADADk	1	N-Term(Dimethyl); S7(Phospho); K16(Dimethyl)	102	ETD	28	1	1783.81	3	595.276	0.52	75.39	5292	OR5_101221_LM_HJ_Epac1_007_SCX_Phospho_F28.raw
VLSSTpSEEDEPGVVK	1	S(3): 0.0; S(4): 0.0; T(5): 0.0; S(6): 100.0	414	Q8NI08	Nuclear receptor coactivator 7 OS=Homo sapiens GN=NCOA7 PE=1 SV=2 - [NCOA7_HUMAN]	1	Q8NI08	S211	Nuclear receptor coactivator 7 (140 kDa estrogen receptor-associated protein) (Estrogen nuclear receptor coactivator 1)	NCOA7 ERAP140 ESNA1 Nbla00052 Nbla10993																					Forward	Class I	vLSSTsEEDEPGVVk	1	N-Term(Dimethyl:2H(4)); S6(Phospho); K15(Dimethyl:2H(4))	93	ETD	14	0	1719.85	3	573.956	-0.04	76.07	5628	OR5_101221_LM_HJ_Epac1_007_SCX_Phospho_F14.raw
SSLGQSApSETEEDTVSVSK	1	S(1): 0.0; S(2): 0.0; S(6): 0.0; S(8): 100.0; T(10): 0.0; T(14): 0.0; S(16): 0.0; S(18): 0.0	414	Q13435	Splicing factor 3B subunit 2 OS=Homo sapiens GN=SF3B2 PE=1 SV=1 - [SF3B2_HUMAN]	1	Q13435	S286	Splicing factor 3B subunit 2 (Pre-mRNA-splicing factor SF3b 145 kDa subunit) (SF3b145) (SF3b150) (Spliceosome-associated protein 145) (SAP 145)	SF3B2 SAP145																					Reverse	Class I	sSLGQSAsETEEDTVSVSk	1	N-Term(Dimethyl); S8(Phospho); K19(Dimethyl)	110	ETD	13	0	2076.92	3	692.979	0.52	86.98	6428	20110105_LM_HJ_Epac_Rev_007_F13.raw
QQTEKPEpSEDEWER	1	T(3): 0.0; S(8): 100.0	413	O60231	Putative pre-mRNA-splicing factor ATP-dependent RNA helicase DHX16 OS=Homo sapiens GN=DHX16 PE=1 SV=2 - [DHX16_HUMAN]	1	O60231	S160	Putative pre-mRNA-splicing factor ATP-dependent RNA helicase DHX16 (EC 3.6.4.13) (ATP-dependent RNA helicase #3) (DEAH-box protein 16)	DHX16 DBP2 DDX16 KIAA0577																					Forward	Class I	qQTEkPEsEDEWER	1	N-Term(Dimethyl); K5(Dimethyl); S8(Phospho)	66	ETD	28	0	1926.81	3	642.943	1	62.46	4434	OR5_101221_LM_HJ_Epac1_007_SCX_Phospho_F28.raw
AGEEDEGEEDpSDSDYEISAK	1	S(11): 100.0; S(13): 0.0; Y(15): 0.0; S(18): 0.0	413	A2RRP1	Neuroblastoma-amplified gene protein OS=Homo sapiens GN=NAG PE=1 SV=1 - [NAG_HUMAN]	1	A2RRP1	S473	Neuroblastoma-amplified sequence (Neuroblastoma-amplified gene protein)	NBAS NAG																					Forward	Class I	aGEEDEGEEDsDSDYEISAk	1	N-Term(Dimethyl); S11(Phospho); K20(Dimethyl)	65	HCD	13	0	2310.87	3	770.96	-0.05	75.97	5565	OR5_101221_LM_HJ_Epac1_007_SCX_Phospho_F13.raw
VNSNpSLDLPSSSDTTHASK	1	S(3): 0.0; S(5): 100.0; S(10): 0.0; S(11): 0.0; S(12): 0.0; T(14): 0.0; T(15): 0.0; S(18): 0.0	413	Q8NEY1	Neuron navigator 1 OS=Homo sapiens GN=NAV1 PE=1 SV=2 - [NAV1_HUMAN]	1	Q8NEY1	S808	Neuron navigator 1 (Pore membrane and/or filament-interacting-like protein 3) (Steerin-1) (Unc-53 homolog 1) (unc53H1)	NAV1 KIAA1151 KIAA1213 POMFIL3 STEERIN1																					Reverse	Class I	vNSNsLDLPSSSDTTHASk	1	N-Term(Dimethyl); S5(Phospho); K19(Dimethyl)	116	HCD	27	0	2095.96	2	1048.48	2.67	87	7212	20110114_LM_HJ_Epac_Rev_007_F27.raw
SHILEDDENpSVDISMLK	1	S(1): 0.0; S(10): 100.0; S(14): 0.0	413	O75717	WD repeat and HMG-box DNA-binding protein 1 OS=Homo sapiens GN=WDHD1 PE=1 SV=1 - [WDHD1_HUMAN]	1	O75717	S383	WD repeat and HMG-box DNA-binding protein 1 (Acidic nucleoplasmic DNA-binding protein 1) (And-1)	WDHD1 AND1																					Forward	Class I	sHILEDDENsVDISmLk	1	N-Term(Dimethyl); S10(Phospho); M15(Oxidation); K17(Dimethyl)	103	ETD	29	0	2096.94	3	699.653	-0.47	120.05	7901	OR5_101221_LM_HJ_Epac1_007_SCX_Phospho_F29.raw
VRGVpSSESSGDREK	1	S(5): 100.0; S(6): 0.0; S(8): 0.0; S(9): 0.0	412	Q13435	Splicing factor 3B subunit 2 OS=Homo sapiens GN=SF3B2 PE=1 SV=1 - [SF3B2_HUMAN]	1	Q13435	S320	Splicing factor 3B subunit 2 (Pre-mRNA-splicing factor SF3b 145 kDa subunit) (SF3b145) (SF3b150) (Spliceosome-associated protein 145) (SAP 145)	SF3B2 SAP145																					Forward	Class I	vRGVsSESSGDREk	1	N-Term(Dimethyl); S5(Phospho); K14(Dimethyl)	91	ETD	33	2	1628.77	3	543.593	0.74	27.6	2153	OR5_101221_LM_HJ_Epac1_007_SCX_Phospho_F33.raw
AIGALASpSRRSpSSEGLSK	2	S(7): 0.0; S(8): 100.0; S(11): 0.0; S(12): 100.0; S(13): 0.0; S(17): 0.0	412	Q86V48	Leucine zipper protein 1 OS=Homo sapiens GN=LUZP1 PE=1 SV=2 - [LUZP1_HUMAN]	1	Q86V48	S570, S574	Leucine zipper protein 1	LUZP1																					Forward	Class I	aIGALASsRRSsSEGLSk	1	N-Term(Dimethyl); S8(Phospho); S12(Phospho); K18(Dimethyl)	108	ETD	28	2	1992.95	3	664.988	-0.84	71.77	5214	OR5_101217_LM_HJ_Epac1_007_SCX_Phospho_F28.raw
SVSSLSNRSpSPLSWR	1	S(1): 0.0; S(3): 0.0; S(4): 0.0; S(6): 0.0; S(9): 0.0; S(10): 100.0; S(13): 0.0	412	Q8NEY1	Neuron navigator 1 OS=Homo sapiens GN=NAV1 PE=1 SV=2 - [NAV1_HUMAN]	1	Q8NEY1	S312	Neuron navigator 1 (Pore membrane and/or filament-interacting-like protein 3) (Steerin-1) (Unc-53 homolog 1) (unc53H1)	NAV1 KIAA1151 KIAA1213 POMFIL3 STEERIN1																					Reverse	Class I	sVSSLSNRSsPLSWR	1	N-Term(Dimethyl); S10(Phospho)	73	ETD	29	1	1770.86	3	590.957	1.41	107.38	6315	20110105_LM_HJ_Epac_Rev_007_F29.raw
TPpSDDEEDNLFAPPK	1	T(1): 0.0; S(3): 100.0	412	Q9Y4E1;Q641Q2	Protein FAM21C OS=Homo sapiens GN=FAM21C PE=1 SV=2 - [FA21C_HUMAN]|Protein FAM21A OS=Homo sapiens GN=FAM21A PE=1 SV=3 - [FA21A_HUMAN]	2	Q9Y4E1	S333	WASH complex subunit FAM21C (Vaccinia virus penetration factor) (VPEF)	FAM21C KIAA0592	Q641Q2		WASH complex subunit FAM21A	FAM21A																	Forward	Class I	tPsDDEEDNLFAPPk	2	N-Term(Dimethyl:2H(4)); S3(Phospho); K15(Dimethyl:2H(4))	46	HCD	13	0	1818.83	2	909.918	0.12	129.08	8781	OR5_101216_LM_HJ_Epac1_007_SCX_Phospho_F13.raw
FKpTQPVTFDEIQEVEEEGVSPMEEEK	1	T(3): 100.0; T(7): 0.0; S(20): 0.0	412	Q7Z7L8	Protein Ag2 homolog OS=Homo sapiens GN=AG2 PE=1 SV=2 - [AG2_HUMAN]	1	Q7Z7L8	T368	Uncharacterized protein C11orf96 (Protein Ag2 homolog)	C11orf96 AG2																					Forward	Class I	fktQPVTFDEIQEVEEEGVSPmEEEk	1	N-Term(Dimethyl); K2(Dimethyl); T3(Phospho); M22(Oxidation); K26(Dimethyl)	50	HCD	27	1	3234.47	3	1078.83	0.17	140.18	9168	OR5_101221_LM_HJ_Epac1_007_SCX_Phospho_F27.raw
RNpTFVGTPFWMAPEVIK	1	T(3): 100.0; T(7): 0.0	412	Q9Y6E0;O00506	Serine/threonine-protein kinase 24 OS=Homo sapiens GN=STK24 PE=1 SV=1 - [STK24_HUMAN]|Serine/threonine-protein kinase 25 OS=Homo sapiens GN=STK25 PE=1 SV=1 - [STK25_HUMAN]	2	Q9Y6E0	T190	Serine/threonine-protein kinase 24 (EC 2.7.11.1) (Mammalian STE20-like protein kinase 3) (MST-3) (STE20-like kinase MST3) [Cleaved into: Serine/threonine-protein kinase 24 36 kDa subunit (Mammalian STE20-like protein kinase 3 N-terminal) (MST3/N); Serine/threonine-protein kinase 24 12 kDa subunit (Mammalian STE20-like protein kinase 3 C-terminal) (MST3/C)]	STK24 MST3 STK3	O00506	T174	Serine/threonine-protein kinase 25 (EC 2.7.11.1) (Ste20-like kinase) (Sterile 20/oxidant stress-response kinase 1) (SOK-1) (Ste20/oxidant stress response kinase 1)	STK25 SOK1 YSK1																	Reverse	Class I	rNtFVGTPFWMAPEVIk	1	N-Term(Dimethyl:2H(4)); T3(Phospho); K17(Dimethyl:2H(4))	87	ETD	28	1	2137.12	3	713.044	0.16	146.99	9339	20110105_LM_HJ_Epac_Rev_007_F28.raw
VSTTTDSPVpSPAQAASPFIPLDELSSK	1	S(2): 0.0; T(3): 0.0; T(4): 0.0; T(5): 0.0; S(7): 0.0; S(10): 100.0; S(16): 0.0; S(25): 0.0; S(26): 0.0	411	Q96E09	Protein FAM122A OS=Homo sapiens GN=FAM122A PE=1 SV=1 - [F122A_HUMAN]	1	Q96E09	S270	Protein FAM122A	FAM122A C9orf42																					Forward	Class I	vSTTTDSPVsPAQAASPFIPLDELSSk	1	N-Term(Dimethyl); S10(Phospho); K27(Dimethyl)	56	HCD	13	0	2881.4	3	961.138	-4.28	148.05	10123	OR5_101216_LM_HJ_Epac1_007_SCX_Phospho_F13.raw
QSETVDQNpSDSDEMLAILK	1	S(2): 0.0; T(4): 0.0; S(9): 100.0; S(11): 0.0	411	P46100	Transcriptional regulator ATRX OS=Homo sapiens GN=ATRX PE=1 SV=3 - [ATRX_HUMAN]	1	P46100	S729	Transcriptional regulator ATRX (EC 3.6.4.12) (ATP-dependent helicase ATRX) (X-linked helicase II) (X-linked nuclear protein) (XNP) (Znf-HX)	ATRX RAD54L XH2																					Forward	Class I	qSETVDQNsDSDEMLAILk	1	N-Term(Dimethyl); S9(Phospho); K19(Dimethyl)	82	HCD	13	0	2259.01	3	753.675	-0.1	146.25	10343	OR5_101221_LM_HJ_Epac1_007_SCX_Phospho_F13.raw
TIpSAQDTLAYATALLNEK	1	T(1): 0.0; S(3): 100.0; T(7): 0.0; Y(10): 0.0; T(12): 0.0	411	Q9UPU5	Ubiquitin carboxyl-terminal hydrolase 24 OS=Homo sapiens GN=USP24 PE=1 SV=2 - [UBP24_HUMAN]	1	Q9UPU5	S1811	Ubiquitin carboxyl-terminal hydrolase 24 (EC 3.4.19.12) (Deubiquitinating enzyme 24) (Ubiquitin thioesterase 24) (Ubiquitin-specific-processing protease 24)	USP24 KIAA1057																					Forward	Class I	tIsAQDTLAYATALLNEk	1	N-Term(Dimethyl); S3(Phospho); K18(Dimethyl)	98	ETD	13	0	2059.04	3	687.017	0.02	153.36	10484	OR5_101216_LM_HJ_Epac1_007_SCX_Phospho_F13.raw
ATpSNVFAMFDQSQIQEFK	1	T(2): 2.8; S(3): 97.2; S(12): 0.0	411	P19105	Myosin regulatory light chain MRLC3 OS=Homo sapiens GN=MRLC3 PE=1 SV=2 - [MRLC3_HUMAN]	1	P19105	S19	Myosin regulatory light chain 12A (MLC-2B) (Myosin RLC) (Myosin regulatory light chain 2, nonsarcomeric) (Myosin regulatory light chain MRLC3)	MYL12A MLCB MRLC3 RLC																					Reverse	Class I	aTsNVFAMFDQSQIQEFk	1	N-Term(Dimethyl); S3(Phospho); K18(Dimethyl)	79	ETD	13	0	2227.02	3	743.01	0.58	151.1	11048	20110105_LM_HJ_Epac_Rev_007_F13.raw
QITQEEDDpSDEEVAPENFFSLPEK	1	T(3): 0.0; S(9): 100.0; S(20): 0.0	411	Q92733	Proline-rich protein PRCC OS=Homo sapiens GN=PRCC PE=1 SV=1 - [PRCC_HUMAN]	1	Q92733	S267	Proline-rich protein PRCC (Papillary renal cell carcinoma translocation-associated gene protein)	PRCC TPRC																					Reverse	Class I	qITQEEDDsDEEVAPENFFSLPEk	1	N-Term(Dimethyl); S9(Phospho); K24(Dimethyl)	95	HCD	13	0	2932.27	2	1466.64	0.36	150.41	12246	20110114_LM_HJ_Epac_Rev_007_F13.raw
LFEEpSDDKEDEDADGK	1	S(5): 100.0	411	O43719	HIV Tat-specific factor 1 OS=Homo sapiens GN=HTATSF1 PE=1 SV=1 - [HTSF1_HUMAN]	1	O43719	S676	HIV Tat-specific factor 1 (Tat-SF1)	HTATSF1																					Forward	Class I	lFEEsDDkEDEDADGk	1	N-Term(Dimethyl); S5(Phospho); K8(Dimethyl); K16(Dimethyl)	69	ETD	27	1	2005.82	3	669.278	0.97	67.21	4537	OR5_101217_LM_HJ_Epac1_007_SCX_Phospho_F27.raw
RQGLAETApSPVAVSLR	1	T(7): 0.0; S(9): 100.0; S(14): 0.0	411	Q15154	Pericentriolar material 1 protein OS=Homo sapiens GN=PCM1 PE=1 SV=2 - [PCM1_HUMAN]	1	Q15154	S861	Pericentriolar material 1 protein (PCM-1) (hPCM-1)	PCM1																					Forward	Class I	rQGLAETAsPVAVSLR	1	N-Term(Dimethyl:2H(4)); S9(Phospho)	100	ETD	29	1	1766.95	3	589.655	2.07	98.99	6898	OR5_101217_LM_HJ_Epac1_007_SCX_Phospho_F29.raw
WDKDDFEpSEEEDVK	1	S(8): 100.0	411	Q7Z6E9	Retinoblastoma-binding protein 6 OS=Homo sapiens GN=RBBP6 PE=1 SV=1 - [RBBP6_HUMAN]	1	Q7Z6E9	S1328	E3 ubiquitin-protein ligase RBBP6 (EC 6.3.2.-) (Proliferation potential-related protein) (Protein P2P-R) (Retinoblastoma-binding Q protein 1) (RBQ-1) (Retinoblastoma-binding protein 6) (p53-associated cellular protein of testis)	RBBP6 P2PR PACT RBQ1 My038																					Reverse	Class I	wDkDDFEsEEEDVk	1	N-Term(Dimethyl:2H(4)); K3(Dimethyl:2H(4)); S8(Phospho); K14(Dimethyl:2H(4))	96	ETD	28	1	1946.87	3	649.627	-2.04	107.26	7165	20110105_LM_HJ_Epac_Rev_007_F28_2.raw
AFVEDpSEDEDGAGEGGSSLLQK	1	S(6): 100.0; S(17): 0.0; S(18): 0.0	411	Q8N9T8	Protein KRI1 homolog OS=Homo sapiens GN=KRI1 PE=1 SV=2 - [KRI1_HUMAN]	1	Q8N9T8	S177	Protein KRI1 homolog	KRI1																					Forward	Class I	aFVEDsEDEDGAGEGGSSLLQk	1	N-Term(Dimethyl); S6(Phospho); K22(Dimethyl)	72	HCD	13	0	2376.02	3	792.677	1.48	122.23	8337	OR5_101216_LM_HJ_Epac1_007_SCX_Phospho_F13.raw
MGLAMGGGGGApSFDRAIEMER	1	S(12): 100.0	411	P52272	Heterogeneous nuclear ribonucleoprotein M OS=Homo sapiens GN=HNRNPM PE=1 SV=3 - [HNRPM_HUMAN]	1	P52272	S618	Heterogeneous nuclear ribonucleoprotein M (hnRNP M)	HNRNPM HNRPM NAGR1																					Forward	Class I	mGLAMGGGGGAsFDRAIEMER	1	N-Term(Dimethyl:2H(4)); S12(Phospho)	110	ETD	27	1	2224.98	3	742.33	-4.13	138.95	9069	OR5_101221_LM_HJ_Epac1_007_SCX_Phospho_F27.raw
RGpSPSAAFTFPDTDDFGK	1	S(3): 100.0; S(5): 0.0; T(9): 0.0; T(13): 0.0	411	Q9ULT0	Tetratricopeptide repeat protein 7A OS=Homo sapiens GN=TTC7A PE=1 SV=3 - [TTC7A_HUMAN]	1	Q9ULT0	S51	Tetratricopeptide repeat protein 7A (TPR repeat protein 7A)	TTC7A KIAA1140 TTC7																					Forward	Class I	rGsPSAAFTFPDTDDFGk	2	N-Term(Dimethyl:2H(4)); S3(Phospho); K18(Dimethyl:2H(4))	71	ETD	28	1	2059.96	3	687.326	0.66	138.83	9455	OR5_101221_LM_HJ_Epac1_007_SCX_Phospho_F28.raw
GTLpSDSEIETNSATSTIFGK	1	T(2): 0.0; S(4): 100.0; S(6): 0.0; T(10): 0.0; S(12): 0.0; T(14): 0.0; S(15): 0.0; T(16): 0.0	411	Q8WXG6	MAP kinase-activating death domain protein OS=Homo sapiens GN=MADD PE=1 SV=2 - [MADD_HUMAN]	1	Q8WXG6	S1239	MAP kinase-activating death domain protein (Differentially expressed in normal and neoplastic cells) (Insulinoma glucagonoma clone 20) (Rab3 GDP/GTP exchange factor)	MADD DENN IG20 KIAA0358																					Forward	Class I	gTLsDSEIETNSATSTIFGk	1	N-Term(Dimethyl); S4(Phospho); K20(Dimethyl)	120	ETD	13	0	2194.02	3	732.011	1.52	141.32	9638	OR5_101216_LM_HJ_Epac1_007_SCX_Phospho_F13.raw
TSRDTpSPSSGSAVSSSK	1	T(1): 0.0; S(2): 0.0; T(5): 0.0; S(6): 99.9; S(8): 0.1; S(9): 0.0; S(11): 0.0; S(14): 0.0; S(15): 0.0; S(16): 0.0	410	Q8NEY8	Periphilin-1 OS=Homo sapiens GN=PPHLN1 PE=1 SV=2 - [PPHLN_HUMAN]	1	Q8NEY8	S205	Periphilin-1 (Gastric cancer antigen Ga50)	PPHLN1 HSPC206 HSPC232																					Forward	Class I	tSRDTsPSSGSAVSSSk	2	N-Term(Dimethyl); S6(Phospho); K17(Dimethyl)	111	ETD	28	1	1776.8	3	592.939	0.54	26.83	2064	OR5_101217_LM_HJ_Epac1_007_SCX_Phospho_F28.raw
IGDEYAEDpSpSDEEDIR	2	Y(5): 0.0; S(9): 100.0; S(10): 100.0	410	Q14137	Ribosome biogenesis protein BOP1 OS=Homo sapiens GN=BOP1 PE=1 SV=2 - [BOP1_HUMAN]	1	Q14137	S126, S127	Ribosome biogenesis protein BOP1 (Block of proliferation 1 protein)	BOP1 KIAA0124																					Reverse	Class I	iGDEYAEDssDEEDIR	1	N-Term(Dimethyl); S9(Phospho); S10(Phospho)	87	ETD	7	0	2030.71	3	677.576	-1.17	62.29	4317	20110105_LM_HJ_Epac_Rev_007_F7.raw
QVQQNpSLHRDSLVTLK	1	S(6): 100.0; S(11): 0.0; T(14): 0.0	410	Q15811	Intersectin-1 OS=Homo sapiens GN=ITSN1 PE=1 SV=3 - [ITSN1_HUMAN]	1	Q15811	S559	Intersectin-1 (SH3 domain-containing protein 1A) (SH3P17)	ITSN1 ITSN SH3D1A																					Forward	Class I	qVQQNsLHRDSLVTLk	1	N-Term(Dimethyl:2H(4)); S6(Phospho); K16(Dimethyl:2H(4))	79	ETD	31	1	2010.1	3	670.705	0.59	84.47	5242	OR5_101221_LM_HJ_Epac1_007_SCX_Phospho_F31.raw
LGEApSDSELADADK	1	S(5): 100.0; S(7): 0.0	410	Q5SW79	Centrosomal protein of 170 kDa OS=Homo sapiens GN=CEP170 PE=1 SV=1 - [CE170_HUMAN]	1	Q5SW79	S1112	Centrosomal protein of 170 kDa (Cep170) (KARP-1-binding protein) (KARP1-binding protein)	CEP170 FAM68A KAB KIAA0470																					Forward	Class I	lGEAsDSELADADk	1	N-Term(Dimethyl); S5(Phospho); K14(Dimethyl)	102	ETD	13	0	1556.67	3	519.563	0.55	84.77	5932	OR5_101216_LM_HJ_Epac1_007_SCX_Phospho_F13.raw
EGAKDIDISpSPEFK	1	S(9): 0.0; S(10): 100.0	410	Q09666	Neuroblast differentiation-associated protein AHNAK OS=Homo sapiens GN=AHNAK PE=1 SV=2 - [AHNK_HUMAN]	1	Q09666	S177	Neuroblast differentiation-associated protein AHNAK (Desmoyokin)	AHNAK PM227																					Reverse	Class I	eGAkDIDISsPEFk	1	N-Term(Dimethyl:2H(4)); K4(Dimethyl:2H(4)); S10(Phospho); K14(Dimethyl:2H(4))	83	ETD	28	1	1711.89	3	571.302	-2.59	102.22	6874	20110105_LM_HJ_Epac_Rev_007_F28_2.raw
AGEQQLpSEPEDMEMEAGDTDDPPR	1	S(7): 100.0; T(19): 0.0	410	Q93009	Ubiquitin carboxyl-terminal hydrolase 7 OS=Homo sapiens GN=USP7 PE=1 SV=1 - [UBP7_HUMAN]	1	Q93009	S18	Ubiquitin carboxyl-terminal hydrolase 7 (EC 3.4.19.12) (Deubiquitinating enzyme 7) (Herpesvirus-associated ubiquitin-specific protease) (Ubiquitin thioesterase 7) (Ubiquitin-specific-processing protease 7)	USP7 HAUSP																					Forward	Class I	aGEQQLsEPEDMEMEAGDTDDPPR	1	N-Term(Dimethyl:2H(4)); S7(Phospho)	58	HCD	13	0	2759.1	3	920.371	-0.24	114.78	8090	OR5_101221_LM_HJ_Epac1_007_SCX_Phospho_F13.raw
NGQLSTINGVAEQDELpSLQEGDLNGQK	1	S(5): 0.0; T(6): 0.0; S(17): 100.0	409	Q02952	A-kinase anchor protein 12 OS=Homo sapiens GN=AKAP12 PE=1 SV=3 - [AKA12_HUMAN]	1	Q02952	S75	A-kinase anchor protein 12 (AKAP-12) (A-kinase anchor protein 250 kDa) (AKAP 250) (Gravin) (Myasthenia gravis autoantigen)	AKAP12 AKAP250																					Forward	Class I	nGQLSTINGVAEQDELsLQEGDLNGQk	1	N-Term(Dimethyl:2H(4)); S17(Phospho); K27(Dimethyl:2H(4))	90	HCD	14	0	3001.46	3	1001.16	0.05	138.21	11760	OR5_101215_LM_HJ_Epac1_007_SCX_Phospho_F14.raw
LLEDGEDFNLGDALDSpSNSMQTIQK	1	S(16): 0.6; S(17): 99.4; S(19): 0.0; T(22): 0.0	409	P05783	Keratin, type I cytoskeletal 18 OS=Homo sapiens GN=KRT18 PE=1 SV=2 - [K1C18_HUMAN]	1	P05783	S399	Keratin, type I cytoskeletal 18 (Cell proliferation-inducing gene 46 protein) (Cytokeratin-18) (CK-18) (Keratin-18) (K18)	KRT18 CYK18 PIG46																					Reverse	Class I	lLEDGEDFNLGDALDSsNSmQTIQk	1	N-Term(Dimethyl); S17(Phospho); M20(Oxidation); K25(Dimethyl)	76	HCD	13	0	2892.29	3	964.768	0.77	145.04	11765	20110114_LM_HJ_Epac_Rev_007_F13.raw
RQDEDYDEQVEEpSLQDEDDNDVYILTK	1	Y(6): 0.0; S(13): 100.0; Y(23): 0.0; T(26): 0.0	409	O00410	Importin-5 OS=Homo sapiens GN=IPO5 PE=1 SV=4 - [IPO5_HUMAN]	1	O00410	S827	Importin-5 (Imp5) (Importin subunit beta-3) (Karyopherin beta-3) (Ran-binding protein 5) (RanBP5)	IPO5 KPNB3 RANBP5																					Reverse	Class I	rQDEDYDEQVEEsLQDEDDNDVYILTk	1	N-Term(Dimethyl); S13(Phospho); K27(Dimethyl)	72	HCD	28	1	3439.46	3	1147.16	0.11	144.85	12245	20110114_LM_HJ_Epac_Rev_007_F28_2_110119042919.raw
KVELSEpSEEDKGGK	1	S(5): 0.0; S(7): 100.0	409	Q8IYB3	Serine/arginine repetitive matrix protein 1 OS=Homo sapiens GN=SRRM1 PE=1 SV=2 - [SRRM1_HUMAN]	1	Q8IYB3	S465	Serine/arginine repetitive matrix protein 1 (SR-related nuclear matrix protein of 160 kDa) (SRm160) (Ser/Arg-related nuclear matrix protein)	SRRM1 SRM160																					Reverse	Class I	kVELSEsEEDkGGk	1	K1(Dimethyl); N-Term(Dimethyl); S7(Phospho); K11(Dimethyl); K14(Dimethyl)	76	ETD	31	2	1726.84	3	576.287	-3.58	39.6	2531	20110105_LM_HJ_Epac_Rev_007_F31.raw
VVEAVNpSDpSDSEFGIPK	2	S(7): 100.0; S(9): 100.0; S(11): 0.0	409	Q02880	DNA topoisomerase 2-beta OS=Homo sapiens GN=TOP2B PE=1 SV=3 - [TOP2B_HUMAN]	1	Q02880	S1522, S1524	DNA topoisomerase 2-beta (EC 5.99.1.3) (DNA topoisomerase II, beta isozyme)	TOP2B																					Forward	Class I	vVEAVNsDsDSEFGIPk	1	N-Term(Dimethyl); S7(Phospho); S9(Phospho); K17(Dimethyl)	100	ETD	7	0	2008.86	3	670.291	1.77	89.06	6236	OR5_101215_LM_HJ_Epac1_007_SCX_Phospho_F7.raw
VGpSLDNVGHLPAGGAVK	1	S(3): 100.0	409	P27816	Microtubule-associated protein 4 OS=Homo sapiens GN=MAP4 PE=1 SV=2 - [MAP4_HUMAN]	1	P27816	S1073	Microtubule-associated protein 4 (MAP-4)	MAP4																					Reverse	Class I	vGsLDNVGHLPAGGAVk	1	N-Term(Dimethyl:2H(4)); S3(Phospho); K17(Dimethyl:2H(4))	76	HCD	28	0	1734.94	2	867.973	0.32	104.25	8684	20110114_LM_HJ_Epac_Rev_007_F28.raw
SSTSGDpTEEEEEEEVVPFSSDEQK	1	S(1): 0.0; S(2): 0.0; T(3): 0.0; S(4): 0.0; T(7): 100.0; S(19): 0.0; S(20): 0.0	409	O15231	Zinc finger protein 185 OS=Homo sapiens GN=ZNF185 PE=1 SV=2 - [ZN185_HUMAN]	1	O15231	T23	Zinc finger protein 185 (LIM domain protein ZNF185) (P1-A)	ZNF185																					Forward	Class I	sSTSGDtEEEEEEEVVPFSSDEQk	1	N-Term(Dimethyl); T7(Phospho); K24(Dimethyl)	102	HCD	13	0	2810.13	2	1405.57	1.35	127.13	8950	OR5_101221_LM_HJ_Epac1_007_SCX_Phospho_F13.raw
NLGpSINTELQDVQR	1	S(4): 100.0; T(7): 0.0	408	O75396	Vesicle-trafficking protein SEC22b OS=Homo sapiens GN=SEC22B PE=1 SV=3 - [SC22B_HUMAN]	1	O75396	S137	Vesicle-trafficking protein SEC22b (ER-Golgi SNARE of 24 kDa) (ERS-24) (ERS24) (SEC22 vesicle-trafficking protein homolog B) (SEC22 vesicle-trafficking protein-like 1)	SEC22B SEC22L1																					Reverse	Class I	nLGsINTELQDVQR	1	N-Term(Dimethyl); S4(Phospho)	83	ETD	14	0	1694.81	3	565.609	1.1	135.65	10229	20110105_LM_HJ_Epac_Rev_007_F14.raw
NMPGLSAATLASLGGTSpSR	1	S(6): 0.0; T(9): 0.0; S(12): 0.0; T(16): 0.0; S(17): 0.0; S(18): 100.0	408	Q32MZ4	Leucine-rich repeat flightless-interacting protein 1 OS=Homo sapiens GN=LRRFIP1 PE=1 SV=2 - [LRRF1_HUMAN]	1	Q32MZ4	S116	Leucine-rich repeat flightless-interacting protein 1 (LRR FLII-interacting protein 1) (GC-binding factor 2) (TAR RNA-interacting protein)	LRRFIP1 GCF2 TRIP																					Forward	Class I	nMPGLSAATLASLGGTSsR	1	N-Term(Dimethyl); S18(Phospho)	133	ETD	14	0	1898.91	3	633.64	0.75	143.5	10535	OR5_101221_LM_HJ_Epac1_007_SCX_Phospho_F14.raw
QAEEECAHRGpSPLPK	1	S(11): 100.0	408	Q9H147	Deoxynucleotidyltransferase terminal-interacting protein 1 OS=Homo sapiens GN=DNTTIP1 PE=1 SV=2 - [TDIF1_HUMAN]	1	Q9H147	S161	Deoxynucleotidyltransferase terminal-interacting protein 1 (Terminal deoxynucleotidyltransferase-interacting factor 1) (TdIF1) (TdT-interacting factor 1)	DNTTIP1 C20orf167 TDIF1																					Forward	Class I	qAEEEcAHRGsPLPk	1	N-Term(Dimethyl:2H(4)); C6(Carbamidomethyl); S11(Phospho); K15(Dimethyl:2H(4))	72	ETD	32	1	1852.89	3	618.301	1.16	39.07	2709	OR5_101217_LM_HJ_Epac1_007_SCX_Phospho_F32.raw
AQQQEEQGpSVNDVKEEEK	1	S(9): 100.0	408	Q9Y4W2	LAS1-like protein OS=Homo sapiens GN=LAS1L PE=1 SV=2 - [LAS1L_HUMAN]	1	Q9Y4W2	S560	Ribosomal biogenesis protein LAS1L (Protein LAS1 homolog)	LAS1L MSTP060																					Forward	Class I	aQQQEEQGsVNDVkEEEk	1	N-Term(Dimethyl); S9(Phospho); K14(Dimethyl); K18(Dimethyl)	73	ETD	27	1	2239.01	3	747.01	0.93	41.47	2872	OR5_101217_LM_HJ_Epac1_007_SCX_Phospho_F27.raw
KTEVVMNSQQpTPVGTPK	1	T(2): 0.0; S(8): 0.0; T(11): 100.0; T(15): 0.0	408	O75781	Paralemmin OS=Homo sapiens GN=PALM PE=1 SV=2 - [PALM_HUMAN]	1	O75781	T141	Paralemmin-1 (Paralemmin)	PALM KIAA0270																					Reverse	Class I	kTEVVmNSQQtPVGTPk	1	N-Term(Dimethyl); K1(Dimethyl); M6(Oxidation); T11(Phospho); K17(Dimethyl)	91	ETD	29	1	2024.01	3	675.342	-0.48	40.24	2913	20110105_LM_HJ_Epac_Rev_007_F29_2.raw
LKEGHETPMDIDpSDDSK	1	T(7): 0.0; S(13): 100.0; S(16): 0.0	408	Q8TDB6	Protein deltex-3-like OS=Homo sapiens GN=DTX3L PE=1 SV=1 - [DTX3L_HUMAN]	1	Q8TDB6	S532	E3 ubiquitin-protein ligase DTX3L (EC 6.3.2.-) (B-lymphoma- and BAL-associated protein) (Protein deltex-3-like) (Rhysin-2) (Rhysin2)	DTX3L BBAP																					Forward	Class I	lkEGHETPmDIDsDDSk	1	N-Term(Dimethyl:2H(4)); K2(Dimethyl:2H(4)); M9(Oxidation); S13(Phospho); K17(Dimethyl:2H(4))	74	ETD	32	1	2108.98	3	703.667	0.09	48.57	3217	OR5_101217_LM_HJ_Epac1_007_SCX_Phospho_F32.raw
NKTEDLEApTSEHFK	1	T(3): 0.0; T(9): 100.0; S(10): 0.0	408	Q9BV40	Vesicle-associated membrane protein 8 OS=Homo sapiens GN=VAMP8 PE=1 SV=1 - [VAMP8_HUMAN]	1	Q9BV40	T54	Vesicle-associated membrane protein 8 (VAMP-8) (Endobrevin) (EDB)	VAMP8																					Reverse	Class I	nkTEDLEAtSEHFk	1	N-Term(Dimethyl); K2(Dimethyl); T9(Phospho); K14(Dimethyl)	84	ETD	32	1	1812.84	3	604.952	-0.55	61.7	3785	20110105_LM_HJ_Epac_Rev_007_F32_2.raw
KLEYDSGpSLKMEPGTSK	1	Y(4): 0.0; S(6): 0.0; S(8): 100.0; T(15): 0.0; S(16): 0.0	408	Q8NEY1	Neuron navigator 1 OS=Homo sapiens GN=NAV1 PE=1 SV=2 - [NAV1_HUMAN]	1	Q8NEY1	S490	Neuron navigator 1 (Pore membrane and/or filament-interacting-like protein 3) (Steerin-1) (Unc-53 homolog 1) (unc53H1)	NAV1 KIAA1151 KIAA1213 POMFIL3 STEERIN1																					Reverse	Class I	kLEYDSGsLkmEPGTSk	1	N-Term(Dimethyl:2H(4)); K1(Dimethyl:2H(4)); S8(Phospho); K10(Dimethyl:2H(4)); M11(Oxidation); K17(Dimethyl:2H(4))	101	ETD	31	2	2094.11	3	698.707	-3.45	64.36	4011	20110105_LM_HJ_Epac_Rev_007_F31_2.raw
EVIDASDKEGMpSPAK	1	S(6): 0.0; S(12): 100.0	408	Q13523	Serine/threonine-protein kinase PRP4 homolog OS=Homo sapiens GN=PRPF4B PE=1 SV=2 - [PRP4B_HUMAN]	1	Q13523	S93	Serine/threonine-protein kinase PRP4 homolog (EC 2.7.11.1) (PRP4 kinase) (PRP4 pre-mRNA-processing factor 4 homolog)	PRPF4B KIAA0536 PRP4 PRP4H PRP4K																					Forward	Class I	eVIDASDkEGMsPAk	1	N-Term(Dimethyl); K8(Dimethyl); S12(Phospho); K15(Dimethyl)	94	ETD	27	1	1740.81	3	580.943	1.24	63.36	4201	OR5_101221_LM_HJ_Epac1_007_SCX_Phospho_F27.raw
TLSNAEDYLDDEDpSD	1	T(1): 0.0; S(3): 0.0; Y(8): 0.0; S(14): 100.0	408	Q92882	Osteoclast-stimulating factor 1 OS=Homo sapiens GN=OSTF1 PE=1 SV=2 - [OSTF1_HUMAN]	1	Q92882	S213	Osteoclast-stimulating factor 1	OSTF1																					Forward	Class I	tLSNAEDYLDDEDsD	1	N-Term(Dimethyl); S14(Phospho)	101	ETD	6	0	1809.66	3	603.892	1.28	78.54	5652	OR5_101217_LM_HJ_Epac1_007_SCX_Phospho_F6.raw
YLSADSGDADDpSDADLGSAVK	1	Y(1): 0.0; S(3): 0.0; S(6): 0.0; S(12): 100.0; S(18): 0.0	408	Q15361	Transcription termination factor 1 OS=Homo sapiens GN=TTF1 PE=1 SV=3 - [TTF1_HUMAN]	1	Q15361	S487	Transcription termination factor 1 (TTF-1) (RNA polymerase I termination factor) (Transcription termination factor I) (TTF-I)	TTF1																					Forward	Class I	yLSADSGDADDsDADLGSAVk	1	N-Term(Dimethyl:2H(4)); S12(Phospho); K21(Dimethyl:2H(4))	98	ETD	13	0	2215.97	3	739.329	-0.31	97.42	6977	OR5_101221_LM_HJ_Epac1_007_SCX_Phospho_F13.raw
SFSLASSSNpSPISQR	1	S(1): 0.0; S(3): 0.0; S(6): 0.0; S(7): 0.0; S(8): 0.0; S(10): 100.0; S(13): 0.0	408	Q9BXB4	Oxysterol-binding protein-related protein 11 OS=Homo sapiens GN=OSBPL11 PE=1 SV=2 - [OSB11_HUMAN]	1	Q9BXB4	S181	Oxysterol-binding protein-related protein 11 (ORP-11) (OSBP-related protein 11)	OSBPL11 ORP11 OSBP12																					Forward	Class I	sFSLASSSNsPISQR	1	N-Term(Dimethyl); S10(Phospho)	80	ETD	14	0	1675.77	3	559.262	1.1	106.58	9237	OR5_101215_LM_HJ_Epac1_007_SCX_Phospho_F14.raw
KSpSPSTGSLDSGNESK	1	S(2): 0.0; S(3): 97.7; S(5): 2.3; T(6): 0.0; S(8): 0.0; S(11): 0.0; S(15): 0.0	407	Q15057	Centaurin-beta-2 OS=Homo sapiens GN=CENTB2 PE=1 SV=3 - [CENB2_HUMAN]	1	Q15057	S379	Arf-GAP with coiled-coil, ANK repeat and PH domain-containing protein 2 (Centaurin-beta-2) (Cnt-b2)	ACAP2 CENTB2 KIAA0041																					Reverse	Class I	kSsPSTGSLDSGNESk	1	N-Term(Dimethyl); K1(Dimethyl); S3(Phospho); K16(Dimethyl)	81	ETD	28	1	1744.8	3	582.271	-1.81	32.05	2370	20110105_LM_HJ_Epac_Rev_007_F28.raw
AGLESGAEPGDGDpSDTTKK	1	S(5): 0.0; S(14): 100.0; T(16): 0.0; T(17): 0.0	407	O60832	H/ACA ribonucleoprotein complex subunit 4 OS=Homo sapiens GN=DKC1 PE=1 SV=3 - [DKC1_HUMAN]	1	O60832	S494	H/ACA ribonucleoprotein complex subunit 4 (EC 5.4.99.-) (CBF5 homolog) (Dyskerin) (Nopp140-associated protein of 57 kDa) (Nucleolar protein NAP57) (Nucleolar protein family A member 4) (snoRNP protein DKC1)	DKC1 NOLA4																					Forward	Class I	aGLESGAEPGDGDsDTTkk	1	N-Term(Dimethyl); S14(Phospho); K18(Dimethyl); K19(Dimethyl)	96	ETD	27	1	1998.88	3	666.966	-3.95	47.53	3253	OR5_101217_LM_HJ_Epac1_007_SCX_Phospho_F27.raw
VENMSSNQDGNDpSDEFM	1	S(5): 0.0; S(6): 0.0; S(13): 100.0	407	Q86WR0	Coiled-coil domain-containing protein 25 OS=Homo sapiens GN=CCDC25 PE=1 SV=2 - [CCD25_HUMAN]	1	Q86WR0	S204	Coiled-coil domain-containing protein 25	CCDC25																					Forward	Class I	vENmSSNQDGNDsDEFm	1	N-Term(Dimethyl); M4(Oxidation); S13(Phospho); M17(Oxidation)	101	ETD	6	0	2058.7	3	686.904	1.51	47.68	3572	OR5_101215_LM_HJ_Epac1_007_SCX_Phospho_F6.raw
AADTEEMDIEMDpSGDEA	1	T(4): 0.0; S(13): 100.0	407	Q9UBB5	Methyl-CpG-binding domain protein 2 OS=Homo sapiens GN=MBD2 PE=1 SV=1 - [MBD2_HUMAN]	1	Q9UBB5	S407	Methyl-CpG-binding domain protein 2 (Demethylase) (DMTase) (Methyl-CpG-binding protein MBD2)	MBD2																					Reverse	Class I	aADTEEMDIEmDsGDEA	1	N-Term(Dimethyl:2H(4)); M11(Oxidation); S13(Phospho)	78	ETD	6	0	1956.7	3	652.904	3.31	61.44	4504	20110105_LM_HJ_Epac_Rev_007_F6.raw
ISSKpSPGHMVILDQTK	1	S(2): 0.0; S(3): 0.0; S(5): 100.0; T(15): 0.0	407	Q9NWH9	SAFB-like transcription modulator OS=Homo sapiens GN=SLTM PE=1 SV=2 - [SLTM_HUMAN]	1	Q9NWH9	S553	SAFB-like transcription modulator (Modulator of estrogen-induced transcription)	SLTM MET																					Reverse	Class I	iSSksPGHmVILDQTk	1	N-Term(Dimethyl); K4(Dimethyl); S5(Phospho); M9(Oxidation); K16(Dimethyl)	75	ETD	30	1	1920.98	3	640.998	-3.41	66.56	4532	20110105_LM_HJ_Epac_Rev_007_F30_2.raw
SRpSTVALTAAGEAEDGTGR	1	S(1): 0.1; S(3): 99.8; T(4): 0.1; T(8): 0.0; T(17): 0.0	407	Q13796	Protein Shroom2 OS=Homo sapiens GN=SHROOM2 PE=1 SV=1 - [SHRM2_HUMAN]	1	Q13796	S646	Protein Shroom2 (Apical-like protein) (Protein APXL)	SHROOM2 APXL																					Forward	Class I	sRsTVALTAAGEAEDGTGR	1	N-Term(Dimethyl); S3(Phospho)	104	ETD	28	1	1956.9	3	652.973	0.64	81.92	5934	OR5_101217_LM_HJ_Epac1_007_SCX_Phospho_F28.raw
KLIDLEpSPTPESQK	1	S(7): 100.0; T(9): 0.0; S(12): 0.0	407	O43166	Signal-induced proliferation-associated 1-like protein 1 OS=Homo sapiens GN=SIPA1L1 PE=1 SV=4 - [SI1L1_HUMAN]	1	O43166	S1549	Signal-induced proliferation-associated 1-like protein 1 (SIPA1-like protein 1) (High-risk human papilloma viruses E6 oncoproteins targeted protein 1) (E6-targeted protein 1)	SIPA1L1 E6TP1 KIAA0440																					Forward	Class I	kLIDLEsPTPESQk	1	N-Term(Dimethyl:2H(4)); K1(Dimethyl:2H(4)); S7(Phospho); K14(Dimethyl:2H(4))	63	ETD	28	1	1760.98	3	587.666	0.38	100.71	7236	OR5_101217_LM_HJ_Epac1_007_SCX_Phospho_F28.raw
RWpSLASLPSSGYGTNTPSSTVSSSCSSQER	1	S(3): 100.0; S(6): 0.0; S(9): 0.0; S(10): 0.0; Y(12): 0.0; T(14): 0.0; T(16): 0.0; S(18): 0.0; S(19): 0.0; T(20): 0.0; S(22): 0.0; S(23): 0.0; S(24): 0.0; S(26): 0.0; S(27): 0.0	407	Q9Y2H9	Microtubule-associated serine/threonine-protein kinase 1 OS=Homo sapiens GN=MAST1 PE=1 SV=2 - [MAST1_HUMAN]	1	Q9Y2H9	S90	Microtubule-associated serine/threonine-protein kinase 1 (EC 2.7.11.1) (Syntrophin-associated serine/threonine-protein kinase)	MAST1 KIAA0973																					Reverse	Class I	rWsLASLPSSGYGTNTPSSTVSSScSSQER	1	N-Term(Dimethyl); S3(Phospho); C25(Carbamidomethyl)	75	HCD	27	1	3284.45	3	1095.49	-1.83	130.98	8371	20110105_LM_HJ_Epac_Rev_007_F27.raw
RSFpSADNFIGIQR	1	S(2): 0.0; S(4): 100.0	407	Q8N7R7	Cyclin-Y-like protein 1 OS=Homo sapiens GN=CCNYL1 PE=1 SV=2 - [CCYL1_HUMAN]	1	Q8N7R7	S344	Cyclin-Y-like protein 1	CCNYL1																					Forward	Class I	rSFsADNFIGIQR	1	N-Term(Dimethyl); S4(Phospho)	85	ETD	29	1	1618.77	3	540.263	-0.05	133.49	8677	OR5_101221_LM_HJ_Epac1_007_SCX_Phospho_F29.raw
SEDDSAKFDpSNEEDSASVFSPSFGLK	1	S(1): 0.0; S(5): 0.0; S(10): 100.0; S(15): 0.0; S(17): 0.0; S(20): 0.0; S(22): 0.0	407	Q02880	DNA topoisomerase 2-beta OS=Homo sapiens GN=TOP2B PE=1 SV=3 - [TOP2B_HUMAN]	1	Q02880	S1466	DNA topoisomerase 2-beta (EC 5.99.1.3) (DNA topoisomerase II, beta isozyme)	TOP2B																					Forward	Class I	sEDDSAkFDsNEEDSASVFSPSFGLk	1	N-Term(Dimethyl); K7(Dimethyl); S10(Phospho); K26(Dimethyl)	67	HCD	27	1	2959.28	3	987.098	0.48	142.49	9395	OR5_101217_LM_HJ_Epac1_007_SCX_Phospho_F27.raw
MSEpSPTPCSGSSFEETEALVNTAAK	1	S(2): 0.6; S(4): 98.9; T(6): 0.6; S(9): 0.0; S(11): 0.0; S(12): 0.0; T(16): 0.0; T(22): 0.0	407	O95359	Transforming acidic coiled-coil-containing protein 2 OS=Homo sapiens GN=TACC2 PE=1 SV=3 - [TACC2_HUMAN]	1	O95359	S2569	Transforming acidic coiled-coil-containing protein 2 (Anti-Zuai-1) (AZU-1)	TACC2																					Forward	Class I	mSEsPTPcSGSSFEETEALVNTAAk	1	N-Term(Dimethyl); S4(Phospho); C8(Carbamidomethyl); K25(Dimethyl)	73	HCD	13	0	2766.19	3	922.735	0.35	140.69	9936	OR5_101221_LM_HJ_Epac1_007_SCX_Phospho_F13.raw
MVIQGPSpSPQGEAMVTDVLEDQK	1	S(7): 0.5; S(8): 99.5; T(16): 0.0	406	Q12888	Tumor suppressor p53-binding protein 1 OS=Homo sapiens GN=TP53BP1 PE=1 SV=2 - [TP53B_HUMAN]	1	Q12888	S1114	Tumor suppressor p53-binding protein 1 (53BP1) (p53-binding protein 1) (p53BP1)	TP53BP1																					Reverse	Class I	mVIQGPSsPQGEAMVTDVLEDQk	1	N-Term(Dimethyl); S8(Phospho); K23(Dimethyl)	60	HCD	14	0	2595.21	3	865.742	1.28	146.17	12444	20110114_LM_HJ_Epac_Rev_007_F14.raw
RQLQEDQENNLQDNQTSNSpSPCR	1	T(16): 0.0; S(17): 0.0; S(19): 0.5; S(20): 99.5	406	Q92576	PHD finger protein 3 OS=Homo sapiens GN=PHF3 PE=1 SV=3 - [PHF3_HUMAN]	1	Q92576	S1614	PHD finger protein 3	PHF3 KIAA0244																					Reverse	Class I	rQLQEDQENNLQDNQTSNSsPcR	1	N-Term(Dimethyl:2H(4)); S20(Phospho); C22(Carbamidomethyl)	71	HCD	30	1	2873.21	3	958.407	-12.09	45.14	2889	20110105_LM_HJ_Epac_Rev_007_F30.raw
DLTHpSDSESSLHMSDR	1	T(3): 0.0; S(5): 100.0; S(7): 0.0; S(9): 0.0; S(10): 0.0; S(14): 0.0	406	Q13586	Stromal interaction molecule 1 OS=Homo sapiens GN=STIM1 PE=1 SV=2 - [STIM1_HUMAN]	1	Q13586	S519	Stromal interaction molecule 1	STIM1 GOK																					Forward	Class I	dLTHsDSESSLHMSDR	1	N-Term(Dimethyl); S5(Phospho)	102	ETD	31	0	1924.77	3	642.263	-0.03	73.35	4673	OR5_101217_LM_HJ_Epac1_007_SCX_Phospho_F31.raw
HTSISESSRQpSLPSLK	1	T(2): 0.0; S(3): 0.0; S(5): 0.0; S(7): 0.0; S(8): 0.0; S(11): 100.0; S(14): 0.0	406	P46939	Utrophin OS=Homo sapiens GN=UTRN PE=1 SV=1 - [UTRO_HUMAN]	1	P46939	S833	Utrophin (Dystrophin-related protein 1) (DRP-1)	UTRN DMDL DRP1																					Forward	Class I	hTSISESSRQsLPSLk	1	N-Term(Dimethyl:2H(4)); S11(Phospho); K16(Dimethyl:2H(4))	100	ETD	33	1	1901	3	634.338	0.87	76.07	4723	OR5_101221_LM_HJ_Epac1_007_SCX_Phospho_F33.raw
GLAEVQQDGEAEEGATpSDGEK	1	T(16): 0.4; S(17): 99.6	406	Q02952	A-kinase anchor protein 12 OS=Homo sapiens GN=AKAP12 PE=1 SV=3 - [AKA12_HUMAN]	1	Q02952	S598	A-kinase anchor protein 12 (AKAP-12) (A-kinase anchor protein 250 kDa) (AKAP 250) (Gravin) (Myasthenia gravis autoantigen)	AKAP12 AKAP250																					Forward	Class I	gLAEVQQDGEAEEGATsDGEk	1	N-Term(Dimethyl:2H(4)); S17(Phospho); K21(Dimethyl:2H(4))	75	HCD	13	0	2264	3	755.34	-0.21	74.6	5454	OR5_101221_LM_HJ_Epac1_007_SCX_Phospho_F13.raw
EGSVLDILKpSPGFASPK	1	S(3): 0.0; S(10): 100.0; S(15): 0.0	406	P49790	Nuclear pore complex protein Nup153 OS=Homo sapiens GN=NUP153 PE=1 SV=2 - [NU153_HUMAN]	1	P49790	S614	Nuclear pore complex protein Nup153 (153 kDa nucleoporin) (Nucleoporin Nup153)	NUP153																					Reverse	Class I	eGSVLDILksPGFASPk	1	N-Term(Dimethyl); K9(Dimethyl); S10(Phospho); K17(Dimethyl)	80	ETD	27	1	1909	3	637.004	-5.83	142.75	9320	20110105_LM_HJ_Epac_Rev_007_F27.raw
TLENSPISSCDTpSDTEGPVPVNSAAVLK	1	T(1): 0.0; S(5): 0.0; S(8): 0.0; S(9): 0.0; T(12): 0.5; S(13): 99.5; T(15): 0.0; S(23): 0.0	406	Q8N556	Actin filament-associated protein 1 OS=Homo sapiens GN=AFAP1 PE=1 SV=2 - [AFAP1_HUMAN]	1	Q8N556	S687	Actin filament-associated protein 1 (110 kDa actin filament-associated protein) (AFAP-110)	AFAP1 AFAP																					Forward	Class I	tLENSPISScDTsDTEGPVPVNSAAVLk	1	N-Term(Dimethyl:2H(4)); C10(Carbamidomethyl); S13(Phospho); K28(Dimethyl:2H(4))	77	HCD	13	0	3032.47	3	1011.49	1.73	136.51	9617	OR5_101221_LM_HJ_Epac1_007_SCX_Phospho_F13.raw
TApSETRpSEGSEYEEIPK	2	T(1): 0.0; S(3): 100.0; T(5): 0.0; S(7): 100.0; S(10): 0.0; Y(12): 0.0	405	P48634	Large proline-rich protein BAT2 OS=Homo sapiens GN=BAT2 PE=1 SV=2 - [BAT2_HUMAN]	1	P48634	S1085, S1089	Protein PRRC2A (HLA-B-associated transcript 2) (Large proline-rich protein BAT2) (Proline-rich and coiled-coil-containing protein 2A) (Protein G2)	PRRC2A BAT2 G2																					Forward	Class I	tAsETRsEGSEYEEIPk	1	N-Term(Dimethyl); S3(Phospho); S7(Phospho); K17(Dimethyl)	90	ETD	14	1	2128.87	3	710.295	-0.68	83.57	7296	OR5_101215_LM_HJ_Epac1_007_SCX_Phospho_F14.raw
GLSDHVpSLDGQELGTR	1	S(3): 0.0; S(7): 100.0; T(15): 0.0	405	Q7L8J4	SH3 domain-binding protein 5-like OS=Homo sapiens GN=SH3BP5L PE=2 SV=1 - [3BP5L_HUMAN]	1	Q7L8J4	S362	SH3 domain-binding protein 5-like (SH3BP-5-like)	SH3BP5L KIAA1720 UNQ2766/PRO7133																					Reverse	Class I	gLSDHVsLDGQELGTR	1	N-Term(Dimethyl); S7(Phospho)	93	ETD	28	0	1791.83	3	597.947	-0.27	112.18	7443	20110105_LM_HJ_Epac_Rev_007_F28_2.raw
HLNSSQPSGFGPANpSLEDVVR	1	S(4): 0.0; S(5): 0.0; S(8): 0.0; S(15): 100.0	405	Q52LW3	Rho GTPase-activating protein 29 OS=Homo sapiens GN=ARHGAP29 PE=1 SV=2 - [RHG29_HUMAN]	1	Q52LW3	S499	Rho GTPase-activating protein 29 (PTPL1-associated RhoGAP protein 1) (Rho-type GTPase-activating protein 29)	ARHGAP29 PARG1																					Forward	Class I	hLNSSQPSGFGPANsLEDVVR	1	N-Term(Dimethyl:2H(4)); S15(Phospho)	74	HCD	29	0	2323.1	3	775.039	0.71	127.96	8585	OR5_101217_LM_HJ_Epac1_007_SCX_Phospho_F29.raw
ELEAERpSLMSpSPEDLTK	2	S(7): 100.0; S(10): 0.0; S(11): 100.0; T(16): 0.0	405	P46821	Microtubule-associated protein 1B OS=Homo sapiens GN=MAP1B PE=1 SV=1 - [MAP1B_HUMAN]	1	P46821	S828, S832	Microtubule-associated protein 1B (MAP-1B) [Cleaved into: MAP1 light chain LC1]	MAP1B																					Reverse	Class I	eLEAERsLMSsPEDLTk	1	N-Term(Dimethyl:2H(4)); S7(Phospho); S11(Phospho); K17(Dimethyl:2H(4))	84	ETD	14	1	2158.99	3	720.334	1.81	129.25	9733	20110105_LM_HJ_Epac_Rev_007_F14.raw
ACpSVEELYAIPPDADVAK	1	S(3): 100.0; Y(8): 0.0	405	Q9H792	Tyrosine-protein kinase SgK269 OS=Homo sapiens GN=SGK269 PE=1 SV=3 - [SG269_HUMAN]	1	Q9H792	S792	Pseudopodium-enriched atypical kinase 1 (EC 2.7.10.2) (Sugen kinase 269) (Tyrosine-protein kinase SgK269)	PEAK1 KIAA2002																					Forward	Class I	acsVEELYAIPPDADVAk	1	N-Term(Dimethyl:2H(4)); C2(Carbamidomethyl); S3(Phospho); K18(Dimethyl:2H(4))	81	HCD	13	0	2092.01	2	1046.51	-0.54	139.26	9829	OR5_101221_LM_HJ_Epac1_007_SCX_Phospho_F13.raw
GApSPLGPGSAAGSGAAASGGLGLGLGGR	1	S(3): 100.0; S(9): 0.0; S(13): 0.0; S(18): 0.0	404	Q6P1R3	Uncharacterized protein C11orf61 OS=Homo sapiens GN=C11orf61 PE=1 SV=1 - [CK061_HUMAN]	1	Q6P1R3	S48	Myb/SANT-like DNA-binding domain-containing protein 2	MSANTD2 C11orf61																					Reverse	Class I	gAsPLGPGSAAGSGAAASGGLGLGLGGR	1	N-Term(Dimethyl:2H(4)); S3(Phospho)	86	HCD	14	0	2335.19	3	779.067	6.76	138.56	11638	20110114_LM_HJ_Epac_Rev_007_F14.raw
KVpSKQEEASGGPTAPK	1	S(3): 100.0; S(9): 0.0; T(13): 0.0	404	P50552	Vasodilator-stimulated phosphoprotein OS=Homo sapiens GN=VASP PE=1 SV=3 - [VASP_HUMAN]	1	P50552	S239	Vasodilator-stimulated phosphoprotein (VASP)	VASP																					Forward	Class I	kVskQEEASGGPTAPk	1	K1(Dimethyl:2H(4)); N-Term(Dimethyl:2H(4)); S3(Phospho); K4(Dimethyl:2H(4)); K16(Dimethyl:2H(4))	91	ETD	31	2	1822.04	3	608.019	0.66	32.19	2393	OR5_101217_LM_HJ_Epac1_007_SCX_Phospho_F31.raw
NFIGNSNHGSQpSPR	1	S(6): 0.0; S(10): 0.0; S(12): 100.0	404	Q03112	Ecotropic virus integration site 1 protein homolog OS=Homo sapiens GN=EVI1 PE=1 SV=2 - [EVI1_HUMAN]	1	Q03112	S860	MDS1 and EVI1 complex locus protein EVI1 (Ecotropic virus integration site 1 protein homolog) (EVI-1)	MECOM EVI1																					Reverse	Class I	nFIGNSNHGSQsPR	1	N-Term(Dimethyl); S12(Phospho)	89	ETD	29	0	1622.7	3	541.572	-4.05	46.2	3010	20110105_LM_HJ_Epac_Rev_007_F29.raw
SSGGREDLESpSGLQR	1	S(1): 0.0; S(2): 0.0; S(10): 0.0; S(11): 100.0	404	Q9UK76	Hematological and neurological expressed 1 protein OS=Homo sapiens GN=HN1 PE=1 SV=3 - [HN1_HUMAN]	1	Q9UK76	S80	Hematological and neurological expressed 1 protein (Androgen-regulated protein 2)	HN1 ARM2																					Forward	Class I	sSGGREDLESsGLQR	1	N-Term(Dimethyl:2H(4)); S11(Phospho)	86	ETD	29	1	1689.78	3	563.931	1.91	55.53	4128	OR5_101217_LM_HJ_Epac1_007_SCX_Phospho_F29.raw
KVIYSQPpSARpSEGEFK	2	Y(4): 0.0; S(5): 0.0; S(8): 100.0; S(11): 100.0	404	Q9Y624	Junctional adhesion molecule A OS=Homo sapiens GN=F11R PE=1 SV=1 - [JAM1_HUMAN]	1	Q9Y624	S284, S287	Junctional adhesion molecule A (JAM-A) (Junctional adhesion molecule 1) (JAM-1) (Platelet F11 receptor) (Platelet adhesion molecule 1) (PAM-1) (CD antigen CD321)	F11R JAM1 JCAM UNQ264/PRO301																					Reverse	Class I	kVIYSQPsARsEGEFk	1	N-Term(Dimethyl); K1(Dimethyl); S8(Phospho); S11(Phospho); K16(Dimethyl)	92	ETD	29	2	2069.97	3	690.662	-0.3	76.65	5318	20110105_LM_HJ_Epac_Rev_007_F29_2.raw
DSFSHpSPGAVSSLK	1	S(2): 0.0; S(4): 0.0; S(6): 100.0; S(11): 0.0; S(12): 0.0	404	Q9H6R7	WD repeat-containing protein C2orf44 OS=Homo sapiens GN=C2orf44 PE=1 SV=1 - [CB044_HUMAN]	1	Q9H6R7	S690	WD repeat-containing protein C2orf44	C2orf44 PP384																					Forward	Class I	dSFSHsPGAVSSLk	1	N-Term(Dimethyl); S6(Phospho); K14(Dimethyl)	103	ETD	27	0	1554.72	3	518.912	1.25	83.17	5464	OR5_101221_LM_HJ_Epac1_007_SCX_Phospho_F27.raw
QALDpSEEEEEDVAAK	1	S(5): 100.0	404	Q8NC44	Protein FAM134A OS=Homo sapiens GN=FAM134A PE=1 SV=2 - [F134A_HUMAN]	1	Q8NC44	S385	Protein FAM134A	FAM134A C2orf17																					Reverse	Class I	qALDsEEEEEDVAAk	1	N-Term(Dimethyl:2H(4)); S5(Phospho); K15(Dimethyl:2H(4))	77	ETD	13	0	1806.82	3	602.943	1.02	74.92	5509	20110105_LM_HJ_Epac_Rev_007_F13.raw
SSKApSLGSLEGEAEAEASSPK	1	S(1): 0.0; S(2): 0.0; S(5): 100.0; S(8): 0.0; S(18): 0.0; S(19): 0.0	404	Q09666	Neuroblast differentiation-associated protein AHNAK OS=Homo sapiens GN=AHNAK PE=1 SV=2 - [AHNK_HUMAN]	1	Q09666	S5749	Neuroblast differentiation-associated protein AHNAK (Desmoyokin)	AHNAK PM227																					Forward	Class I	sSkAsLGSLEGEAEAEASSPk	1	N-Term(Dimethyl); K3(Dimethyl); S5(Phospho); K21(Dimethyl)	142	ETD	27	1	2199.05	3	733.688	2.62	125.06	8218	OR5_101217_LM_HJ_Epac1_007_SCX_Phospho_F27.raw
FHpYDNTAGISQYLQNSK	1	Y(3): 100.0; T(6): 0.0; S(10): 0.0; Y(12): 0.0; S(16): 0.0	404	P35968	Vascular endothelial growth factor receptor 2 OS=Homo sapiens GN=KDR PE=1 SV=2 - [VGFR2_HUMAN]	1	P35968	Y1214	Vascular endothelial growth factor receptor 2 (VEGFR-2) (EC 2.7.10.1) (Fetal liver kinase 1) (FLK-1) (Kinase insert domain receptor) (KDR) (Protein-tyrosine kinase receptor flk-1) (CD antigen CD309)	KDR FLK1 VEGFR2																					Forward	Class I	fHyDNTAGISQYLQNSk	1	N-Term(Dimethyl); Y3(Phospho); K17(Dimethyl)	97	HCD	29	0	2121.96	2	1061.48	-0.69	128.44	8364	OR5_101221_LM_HJ_Epac1_007_SCX_Phospho_F29.raw
TGpSYGALAEITASK	1	T(1): 0.0; S(3): 100.0; Y(4): 0.0; T(11): 0.0; S(13): 0.0	404	O14974	Protein phosphatase 1 regulatory subunit 12A OS=Homo sapiens GN=PPP1R12A PE=1 SV=1 - [MYPT1_HUMAN]	1	O14974	S445	Protein phosphatase 1 regulatory subunit 12A (Myosin phosphatase-targeting subunit 1) (Myosin phosphatase target subunit 1) (Protein phosphatase myosin-binding subunit)	PPP1R12A MBS MYPT1																					Forward	Class I	tGsYGALAEITASk	1	N-Term(Dimethyl); S3(Phospho); K14(Dimethyl)	95	ETD	13	0	1504.73	3	502.248	0.9	134.94	9178	OR5_101216_LM_HJ_Epac1_007_SCX_Phospho_F13.raw
RGILHTDSQSQpSLR	1	T(6): 0.0; S(8): 0.0; S(10): 0.0; S(12): 100.0	403	Q15678	Tyrosine-protein phosphatase non-receptor type 14 OS=Homo sapiens GN=PTPN14 PE=1 SV=1 - [PTN14_HUMAN]	1	Q15678	S465	Tyrosine-protein phosphatase non-receptor type 14 (EC 3.1.3.48) (Protein-tyrosine phosphatase pez)	PTPN14 PEZ																					Forward	Class I	rGILHTDSQSQsLR	1	N-Term(Dimethyl); S12(Phospho)	89	ETD	36	1	1705.84	3	569.284	-0.01	46.98	3102	OR5_101217_LM_HJ_Epac1_007_SCX_Phospho_F36.raw
SLpSVPTDSGTTDVDYDEEQK	1	S(1): 0.3; S(3): 99.7; T(6): 0.0; S(8): 0.0; T(10): 0.0; T(11): 0.0; Y(15): 0.0	403	Q5HYW2	NHS-like protein 2 OS=Homo sapiens GN=NHSL2 PE=2 SV=1 - [NHSL2_HUMAN]	1	Q5HYW2	S134	NHS-like protein 2	NHSL2																					Reverse	Class I	sLsVPTDSGTTDVDYDEEQk	3	N-Term(Dimethyl:2H(4)); S3(Phospho); K20(Dimethyl:2H(4))	79	HCD	13	0	2330.04	3	777.353	1.14	103.18	7633	20110105_LM_HJ_Epac_Rev_007_F13.raw
FEEESKEPVADEEEEDpSDDDVEPITEFR	1	S(5): 0.0; S(17): 100.0; T(25): 0.0	403	P54105	Methylosome subunit pICln OS=Homo sapiens GN=CLNS1A PE=1 SV=1 - [ICLN_HUMAN]	1	P54105	S102	Methylosome subunit pICln (Chloride channel, nucleotide sensitive 1A) (Chloride conductance regulatory protein ICln) (I(Cln)) (Chloride ion current inducer protein) (ClCI) (Reticulocyte pICln)	CLNS1A CLCI ICLN																					Forward	Class I	fEEESkEPVADEEEEDsDDDVEPITEFR	1	N-Term(Dimethyl); K6(Dimethyl); S17(Phospho)	72	HCD	27	1	3450.42	3	1150.81	0.38	134.3	8710	OR5_101221_LM_HJ_Epac1_007_SCX_Phospho_F27.raw
GFNGCDpSPEPDGEDSLEQSPLLEDK	1	S(7): 100.0; S(15): 0.0; S(19): 0.0	402	Q14814	Myocyte-specific enhancer factor 2D OS=Homo sapiens GN=MEF2D PE=1 SV=1 - [MEF2D_HUMAN]	1	Q14814	S98	Myocyte-specific enhancer factor 2D	MEF2D																					Reverse	Class I	gFNGcDsPEPDGEDSLEQSPLLEDk	1	N-Term(Dimethyl); C5(Carbamidomethyl); S7(Phospho); K25(Dimethyl)	69	HCD	13	0	2871.19	3	957.735	-0.27	138.44	10110	20110105_LM_HJ_Epac_Rev_007_F13.raw
SATLSGpSATNLASLTAALAK	1	S(1): 0.0; T(3): 0.0; S(5): 0.0; S(7): 100.0; T(9): 0.0; S(13): 0.0; T(15): 0.0	402	Q9NQT8	Kinesin-like protein KIF13B OS=Homo sapiens GN=KIF13B PE=1 SV=1 - [KI13B_HUMAN]	1	Q9NQT8	S1797	Kinesin-like protein KIF13B (Kinesin-like protein GAKIN)	KIF13B GAKIN KIAA0639																					Forward	Class I	sATLSGsATNLASLTAALAk	1	N-Term(Dimethyl); S7(Phospho); K20(Dimethyl)	80	ETD	13	0	1984.03	3	662.014	-4.41	148.23	10135	OR5_101216_LM_HJ_Epac1_007_SCX_Phospho_F13.raw
ISNLpSPEEEQGLWK	1	S(2): 0.0; S(5): 100.0	402	Q5HYJ3	Protein FAM76B OS=Homo sapiens GN=FAM76B PE=1 SV=2 - [FA76B_HUMAN]	1	Q5HYJ3	S193	Protein FAM76B	FAM76B																					Reverse	Class I	iSNLsPEEEQGLWk	1	N-Term(Dimethyl:2H(4)); S5(Phospho); K14(Dimethyl:2H(4))	95	ETD	14	0	1773.89	3	591.969	0.65	136.23	10284	20110105_LM_HJ_Epac_Rev_007_F14.raw
QREMLMEDVGpSEEEQEEEDEAPFQEK	1	S(11): 100.0	402	Q9H1E3	Nuclear ubiquitous casein and cyclin-dependent kinases substrate OS=Homo sapiens GN=NUCKS1 PE=1 SV=1 - [NUCKS_HUMAN]	1	Q9H1E3	S113	Nuclear ubiquitous casein and cyclin-dependent kinase substrate 1 (P1)	NUCKS1 NUCKS JC7																					Reverse	Class I	qREmLmEDVGsEEEQEEEDEAPFQEk	1	N-Term(Dimethyl); M4(Oxidation); M6(Oxidation); S11(Phospho); K26(Dimethyl)	71	HCD	28	1	3309.38	3	1103.8	14.26	121.46	10504	20110114_LM_HJ_Epac_Rev_007_F28_2.raw
STSAPQMSPGSSDNQSSpSPQPAQQK	1	S(1): 0.0; T(2): 0.0; S(3): 0.0; S(8): 0.0; S(11): 0.0; S(12): 0.0; S(16): 0.0; S(17): 0.5; S(18): 99.5	402	Q14157	Ubiquitin-associated protein 2-like OS=Homo sapiens GN=UBAP2L PE=1 SV=2 - [UBP2L_HUMAN]	1	Q14157	S477	Ubiquitin-associated protein 2-like (Protein NICE-4)	UBAP2L KIAA0144 NICE4																					Reverse	Class I	sTSAPQmSPGSSDNQSSsPQPAQQk	1	N-Term(Dimethyl:2H(4)); M7(Oxidation); S18(Phospho); K25(Dimethyl:2H(4))	61	HCD	14	0	2692.2	3	898.072	-0.1	32.13	2410	20110114_LM_HJ_Epac_Rev_007_F14.raw
LSSLRApSTSKSESSQK	1	S(2): 0.0; S(3): 0.0; S(7): 100.0; T(8): 0.0; S(9): 0.0; S(11): 0.0; S(13): 0.0; S(14): 0.0	402	P62753	40S ribosomal protein S6 OS=Homo sapiens GN=RPS6 PE=1 SV=1 - [RS6_HUMAN]	1	P62753	S240	40S ribosomal protein S6 (Phosphoprotein NP33)	RPS6 OK/SW-cl.2																					Forward	Class I	lSSLRAsTSkSESSQk	1	N-Term(Dimethyl:2H(4)); S7(Phospho); K10(Dimethyl:2H(4)); K16(Dimethyl:2H(4))	95	ETD	31	2	1872.02	3	624.679	-0.45	36.14	2585	OR5_101221_LM_HJ_Epac1_007_SCX_Phospho_F31.raw
SKGHYEVTGpSDDETGK	1	S(1): 0.0; Y(5): 0.0; T(8): 0.1; S(10): 99.9; T(14): 0.0	402	Q09666	Neuroblast differentiation-associated protein AHNAK OS=Homo sapiens GN=AHNAK PE=1 SV=2 - [AHNK_HUMAN]	1	Q09666	S5841	Neuroblast differentiation-associated protein AHNAK (Desmoyokin)	AHNAK PM227																					Forward	Class I	skGHYEVTGsDDETGk	1	N-Term(Dimethyl:2H(4)); K2(Dimethyl:2H(4)); S10(Phospho); K16(Dimethyl:2H(4))	76	ETD	33	1	1885.9	3	629.304	0.79	36.97	2674	OR5_101221_LM_HJ_Epac1_007_SCX_Phospho_F33.raw
KTEVVMNSQQTPVGpTPK	1	T(2): 0.0; S(8): 0.0; T(11): 0.0; T(15): 100.0	402	O75781	Paralemmin OS=Homo sapiens GN=PALM PE=1 SV=2 - [PALM_HUMAN]	1	O75781	T145	Paralemmin-1 (Paralemmin)	PALM KIAA0270																					Forward	Class I	kTEVVmNSQQTPVGtPk	1	N-Term(Dimethyl:2H(4)); K1(Dimethyl:2H(4)); M6(Oxidation); T15(Phospho); K17(Dimethyl:2H(4))	75	ETD	29	1	2036.09	3	679.367	-0.69	49.64	3724	OR5_101217_LM_HJ_Epac1_007_SCX_Phospho_F29.raw
NIGRDpTPTSAGPNSFNK	1	T(6): 100.0; T(8): 0.0; S(9): 0.0; S(14): 0.0	402	Q8WW12	PEST proteolytic signal-containing nuclear protein OS=Homo sapiens GN=PCNP PE=1 SV=2 - [PCNP_HUMAN]	1	Q8WW12	T139	PEST proteolytic signal-containing nuclear protein (PCNP) (PEST-containing nuclear protein)	PCNP																					Reverse	Class I	nIGRDtPTSAGPNSFNk	1	N-Term(Dimethyl:2H(4)); T6(Phospho); K17(Dimethyl:2H(4))	78	ETD	28	1	1919.94	3	640.653	-1.34	64.91	4574	20110105_LM_HJ_Epac_Rev_007_F28.raw
ELLHSVHPEpSPNLK	1	S(5): 0.0; S(10): 100.0	402	Q9Y217	Myotubularin-related protein 6 OS=Homo sapiens GN=MTMR6 PE=1 SV=2 - [MTMR6_HUMAN]	1	Q9Y217	S561	Myotubularin-related protein 6 (EC 3.1.3.-)	MTMR6																					Forward	Class I	eLLHSVHPEsPNLk	1	N-Term(Dimethyl); S10(Phospho); K14(Dimethyl)	74	ETD	31	0	1735.88	3	579.298	0.31	80.97	5063	OR5_101221_LM_HJ_Epac1_007_SCX_Phospho_F31.raw
LRGLDSSSTAPpSALGER	1	S(6): 0.0; S(7): 0.0; S(8): 0.0; T(9): 0.0; S(12): 100.0	402	O15534	Period circadian protein homolog 1 OS=Homo sapiens GN=PER1 PE=1 SV=1 - [PER1_HUMAN]	1	O15534	S815	Period circadian protein homolog 1 (hPER1) (Circadian clock protein PERIOD 1) (Circadian pacemaker protein Rigui)	PER1 KIAA0482 PER RIGUI																					Forward	Class I	lRGLDSSSTAPsALGER	1	N-Term(Dimethyl:2H(4)); S12(Phospho)	92	ETD	29	1	1828.91	3	610.308	-0.51	93.38	6562	OR5_101217_LM_HJ_Epac1_007_SCX_Phospho_F29.raw
VNPVTSLSENYTCpSDSEESSEK	1	T(5): 0.0; S(6): 0.0; S(8): 0.0; Y(11): 0.0; T(12): 0.0; S(14): 100.0; S(16): 0.0; S(19): 0.0; S(20): 0.0	402	Q14432	cGMP-inhibited 3',5'-cyclic phosphodiesterase A OS=Homo sapiens GN=PDE3A PE=1 SV=3 - [PDE3A_HUMAN]	1	Q14432	S408	cGMP-inhibited 3',5'-cyclic phosphodiesterase A (EC 3.1.4.17) (Cyclic GMP-inhibited phosphodiesterase A) (CGI-PDE A)	PDE3A																					Reverse	Class I	vNPVTSLSENYTcsDSEESSEk	1	N-Term(Dimethyl); C13(Carbamidomethyl); S14(Phospho); K22(Dimethyl)	84	HCD	13	0	2598.08	3	866.699	0.5	113.38	8321	20110105_LM_HJ_Epac_Rev_007_F13.raw
SGKQGpSPDQVSPVSEMTSTSLYQDK	1	S(1): 0.0; S(6): 100.0; S(11): 0.0; S(14): 0.0; T(17): 0.0; S(18): 0.0; T(19): 0.0; S(20): 0.0; Y(22): 0.0	402	P46821	Microtubule-associated protein 1B OS=Homo sapiens GN=MAP1B PE=1 SV=1 - [MAP1B_HUMAN]	1	P46821	S1438	Microtubule-associated protein 1B (MAP-1B) [Cleaved into: MAP1 light chain LC1]	MAP1B																					Forward	Class I	sGkQGsPDQVSPVSEMTSTSLYQDk	1	N-Term(Dimethyl:2H(4)); K3(Dimethyl:2H(4)); S6(Phospho); K25(Dimethyl:2H(4))	85	HCD	27	1	2832.37	3	944.796	-0.67	127.45	8366	OR5_101217_LM_HJ_Epac1_007_SCX_Phospho_F27.raw
AGEPDGEpSLDEQPSSSSSK	1	S(8): 100.0; S(14): 0.0; S(15): 0.0; S(16): 0.0; S(17): 0.0; S(18): 0.0	401	Q9H3Q1	Cdc42 effector protein 4 OS=Homo sapiens GN=CDC42EP4 PE=1 SV=1 - [BORG4_HUMAN]	1	Q9H3Q1	S64	Cdc42 effector protein 4 (Binder of Rho GTPases 4)	CDC42EP4 BORG4 CEP4																					Forward	Class I	aGEPDGEsLDEQPSSSSSk	1	N-Term(Dimethyl); S8(Phospho); K19(Dimethyl)	103	ETD	14	0	2042.84	3	681.62	0.23	53.9	4452	OR5_101215_LM_HJ_Epac1_007_SCX_Phospho_F14.raw
AGAGMITQHSSNApSPINR	1	T(7): 0.0; S(10): 0.0; S(11): 0.0; S(14): 100.0	401	Q9NWH9	SAFB-like transcription modulator OS=Homo sapiens GN=SLTM PE=1 SV=2 - [SLTM_HUMAN]	1	Q9NWH9	S1002	SAFB-like transcription modulator (Modulator of estrogen-induced transcription)	SLTM MET																					Forward	Class I	aGAGMITQHSSNAsPINR	1	N-Term(Dimethyl); S14(Phospho)	100	ETD	28	0	1919.88	3	640.632	0.61	61.77	4484	OR5_101217_LM_HJ_Epac1_007_SCX_Phospho_F28.raw
CSSSSGGGpSpSGDEDGLELDGAPGGGK	2	S(2): 0.0; S(3): 0.0; S(4): 0.0; S(5): 0.0; S(9): 100.0; S(10): 100.0	401	Q9P258	Protein RCC2 OS=Homo sapiens GN=RCC2 PE=1 SV=2 - [RCC2_HUMAN]	1	Q9P258	S50, S51	Protein RCC2 (RCC1-like protein TD-60) (Telophase disk protein of 60 kDa)	RCC2 KIAA1470 TD60																					Reverse	Class I	cSSSSGGGssGDEDGLELDGAPGGGk	1	N-Term(Dimethyl:2H(4)); C1(Carbamidomethyl); S9(Phospho); S10(Phospho); K26(Dimethyl:2H(4))	46	HCD	7	0	2564	3	855.337	-0.59	66.24	4604	20110105_LM_HJ_Epac_Rev_007_F7.raw
SSpSVGSSSSYPISPAVSR	1	S(1): 0.0; S(2): 0.0; S(3): 100.0; S(6): 0.0; S(7): 0.0; S(8): 0.0; S(9): 0.0; Y(10): 0.0; S(13): 0.0; S(17): 0.0	401	Q15149	Plectin-1 OS=Homo sapiens GN=PLEC1 PE=1 SV=2 - [PLEC1_HUMAN]	1	Q15149	S4386	Plectin (PCN) (PLTN) (Hemidesmosomal protein 1) (HD1) (Plectin-1)	PLEC PLEC1																					Reverse	Class I	sSsVGSSSSYPISPAVSR	1	N-Term(Dimethyl); S3(Phospho)	90	ETD	4	0	1862.85	3	621.623	0.83	63.5	4921	20110105_LM_HJ_Epac_Rev_007_F4.raw
VSPpSIHGYHFDTASR	1	S(2): 0.0; S(4): 100.0; Y(8): 0.0; T(12): 0.0; S(14): 0.0	401	Q9NR00	Uncharacterized protein C8orf4 OS=Homo sapiens GN=C8orf4 PE=1 SV=1 - [CH004_HUMAN]	1	Q9NR00	S21	Uncharacterized protein C8orf4 (Thyroid cancer protein 1) (TC-1)	C8orf4 TC1																					Forward	Class I	vSPsIHGYHFDTASR	1	N-Term(Dimethyl:2H(4)); S4(Phospho)	90	ETD	32	0	1785.83	3	595.948	1.41	95.55	5548	OR5_101221_LM_HJ_Epac1_007_SCX_Phospho_F32.raw
QKEDVEVVGGpSDGEGAIGLSSDPK	1	S(11): 100.0; S(20): 0.0; S(21): 0.0	401	Q8NHZ8	Anaphase-promoting complex subunit CDC26 OS=Homo sapiens GN=CDC26 PE=1 SV=1 - [CDC26_HUMAN]	1	Q8NHZ8	S42	Anaphase-promoting complex subunit CDC26 (Anaphase-promoting complex subunit 12) (APC12) (Cell division cycle protein 26 homolog)	CDC26 ANAPC12 C9orf17																					Forward	Class I	qkEDVEVVGGsDGEGAIGLSSDPk	1	N-Term(Dimethyl); K2(Dimethyl); S11(Phospho); K24(Dimethyl)	62	HCD	28	1	2537.21	3	846.407	1.74	104.85	7213	OR5_101221_LM_HJ_Epac1_007_SCX_Phospho_F28.raw
GSLQAHDTSpSLPTVIMR	1	S(2): 0.0; T(8): 0.0; S(9): 0.0; S(10): 100.0; T(13): 0.0	401	Q12802	A-kinase anchor protein 13 OS=Homo sapiens GN=AKAP13 PE=1 SV=2 - [AKP13_HUMAN]	1	Q12802	S1857	A-kinase anchor protein 13 (AKAP-13) (AKAP-Lbc) (Breast cancer nuclear receptor-binding auxiliary protein) (Guanine nucleotide exchange factor Lbc) (Human thyroid-anchoring protein 31) (Lymphoid blast crisis oncogene) (LBC oncogene) (Non-oncogenic Rho GTPase-specific GTP exchange factor) (Protein kinase A-anchoring protein 13) (PRKA13) (p47)	AKAP13 BRX HT31 LBC																					Forward	Class I	gSLQAHDTSsLPTVIMR	1	N-Term(Dimethyl); S10(Phospho)	66	ETD	28	0	1920.92	3	640.98	-0.26	121.19	8642	OR5_101217_LM_HJ_Epac1_007_SCX_Phospho_F28.raw
RWpSLASLPSSGYGTNTPSSTVSSSCSSQEK	1	S(3): 100.0; S(6): 0.0; S(9): 0.0; S(10): 0.0; Y(12): 0.0; T(14): 0.0; T(16): 0.0; S(18): 0.0; S(19): 0.0; T(20): 0.0; S(22): 0.0; S(23): 0.0; S(24): 0.0; S(26): 0.0; S(27): 0.0	401	Q6P0Q8;O15021	Microtubule-associated serine/threonine-protein kinase 2 OS=Homo sapiens GN=MAST2 PE=1 SV=2 - [MAST2_HUMAN]|Microtubule-associated serine/threonine-protein kinase 4 OS=Homo sapiens GN=MAST4 PE=1 SV=2 - [MAST4_HUMAN]	2	Q6P0Q8	S230	Microtubule-associated serine/threonine-protein kinase 2 (EC 2.7.11.1)	MAST2 KIAA0807 MAST205	O15021		Microtubule-associated serine/threonine-protein kinase 4 (EC 2.7.11.1)	MAST4 KIAA0303																	Forward	Class I	rWsLASLPSSGYGTNTPSSTVSSScSSQEk	1	N-Term(Dimethyl); S3(Phospho); C25(Carbamidomethyl); K30(Dimethyl)	73	HCD	27	1	3284.47	3	1095.5	-1.68	134.53	8817	OR5_101217_LM_HJ_Epac1_007_SCX_Phospho_F27.raw
SRpSGEGEVSGLMR	1	S(1): 0.0; S(3): 100.0; S(9): 0.0	400	Q13263	Transcription intermediary factor 1-beta OS=Homo sapiens GN=TRIM28 PE=1 SV=5 - [TIF1B_HUMAN]	1	Q13263	S473	Transcription intermediary factor 1-beta (TIF1-beta) (E3 SUMO-protein ligase TRIM28) (EC 6.3.2.-) (KRAB-associated protein 1) (KAP-1) (KRAB-interacting protein 1) (KRIP-1) (Nuclear corepressor KAP-1) (RING finger protein 96) (Tripartite motif-containing protein 28)	TRIM28 KAP1 RNF96 TIF1B																					Reverse	Class I	sRsGEGEVSGLmR	1	N-Term(Dimethyl); S3(Phospho); M12(Oxidation)	93	ETD	29	1	1488.65	3	496.888	-1.32	48.36	3460	20110105_LM_HJ_Epac_Rev_007_F29_2.raw
RAPpSVANVGSHCDLSLK	1	S(4): 100.0; S(10): 0.0; S(15): 0.0	400	P21333	Filamin-A OS=Homo sapiens GN=FLNA PE=1 SV=4 - [FLNA_HUMAN]	1	P21333	S2152	Filamin-A (FLN-A) (Actin-binding protein 280) (ABP-280) (Alpha-filamin) (Endothelial actin-binding protein) (Filamin-1) (Non-muscle filamin)	FLNA FLN FLN1																					Reverse	Class I	rAPsVANVGSHcDLSLk	1	N-Term(Dimethyl:2H(4)); S4(Phospho); C12(Carbamidomethyl); K17(Dimethyl:2H(4))	94	ETD	31	1	1955	3	652.339	-0.39	81.58	4745	20110105_LM_HJ_Epac_Rev_007_F31.raw
KGpSITEYTAAEEK	1	S(3): 100.0; T(5): 0.0; Y(7): 0.0; T(8): 0.0	400	Q12982	BCL2/adenovirus E1B 19 kDa protein-interacting protein 2 OS=Homo sapiens GN=BNIP2 PE=1 SV=1 - [BNIP2_HUMAN]	1	Q12982	S114	BCL2/adenovirus E1B 19 kDa protein-interacting protein 2	BNIP2 NIP2																					Forward	Class I	kGsITEYTAAEEk	1	N-Term(Dimethyl); K1(Dimethyl); S3(Phospho); K13(Dimethyl)	81	ETD	28	1	1590.77	3	530.927	0.9	67.44	4896	OR5_101217_LM_HJ_Epac1_007_SCX_Phospho_F28.raw
WTKPSSFpSDSER	1	T(2): 0.0; S(5): 0.0; S(6): 0.0; S(8): 100.0; S(10): 0.0	400	Q8NC56	LEM domain-containing protein 2 OS=Homo sapiens GN=LEMD2 PE=1 SV=1 - [LEMD2_HUMAN]	1	Q8NC56	S499	LEM domain-containing protein 2 (hLEM2)	LEMD2																					Reverse	Class I	wTkPSSFsDSER	1	N-Term(Dimethyl); K3(Dimethyl); S8(Phospho)	84	ETD	29	0	1562.69	3	521.568	-0.25	73.74	5132	20110105_LM_HJ_Epac_Rev_007_F29_2.raw
FNDpSEGDDTEETEDYR	1	S(4): 100.0; T(9): 0.0; T(12): 0.0; Y(15): 0.0	400	Q9NYF8	Bcl-2-associated transcription factor 1 OS=Homo sapiens GN=BCLAF1 PE=1 SV=2 - [BCLF1_HUMAN]	1	Q9NYF8	S397	Bcl-2-associated transcription factor 1 (Btf)	BCLAF1 BTF KIAA0164																					Reverse	Class I	fNDsEGDDTEETEDYR	1	N-Term(Dimethyl:2H(4)); S4(Phospho)	119	HCD	13	0	2033.74	2	1017.37	-0.47	73.58	5402	20110105_LM_HJ_Epac_Rev_007_F13.raw
RTEpSVPSDINNPVDR	1	T(2): 0.0; S(4): 100.0; S(7): 0.0	400	Q8IVT5	Kinase suppressor of Ras 1 OS=Homo sapiens GN=KSR1 PE=1 SV=2 - [KSR1_HUMAN]	1	Q8IVT5	S404	Kinase suppressor of Ras 1	KSR1 KSR																					Forward	Class I	rTEsVPSDINNPVDR	1	N-Term(Dimethyl); S4(Phospho)	86	ETD	28	1	1806.84	3	602.951	0.49	74.53	5412	OR5_101217_LM_HJ_Epac1_007_SCX_Phospho_F28.raw
RVLLQApSQDENFGNTTPR	1	S(7): 100.0; T(15): 0.0; T(16): 0.0	400	P57740	Nuclear pore complex protein Nup107 OS=Homo sapiens GN=NUP107 PE=1 SV=1 - [NU107_HUMAN]	1	P57740	S37	Nuclear pore complex protein Nup107 (107 kDa nucleoporin) (Nucleoporin Nup107)	NUP107																					Reverse	Class I	rVLLQAsQDENFGNTTPR	1	N-Term(Dimethyl); S7(Phospho)	95	ETD	29	1	2154.02	3	718.679	-5.6	96.98	5758	20110105_LM_HJ_Epac_Rev_007_F29.raw
ETNLDSLPLVDTHpSK	1	T(2): 0.0; S(6): 0.0; T(12): 0.0; S(14): 100.0	400	P08670	Vimentin OS=Homo sapiens GN=VIM PE=1 SV=4 - [VIME_HUMAN]	1	P08670	S438	Vimentin	VIM																					Reverse	Class I	eTNLDSLPLVDTHsk	1	N-Term(Dimethyl:2H(4)); S14(Phospho); K15(Dimethyl:2H(4))	132	ETD	27	0	1812.93	3	604.98	1.46	125.52	8521	20110105_LM_HJ_Epac_Rev_007_F27_2.raw
KGGEFDEFVNDDpTDDDLPISK	1	T(13): 100.0; S(20): 0.0	400	Q6PD62	RNA polymerase-associated protein CTR9 homolog OS=Homo sapiens GN=CTR9 PE=1 SV=1 - [CTR9_HUMAN]	1	Q6PD62	T925	RNA polymerase-associated protein CTR9 homolog (SH2 domain-binding protein 1)	CTR9 KIAA0155 SH2BP1																					Reverse	Class I	kGGEFDEFVNDDtDDDLPISk	1	N-Term(Dimethyl); K1(Dimethyl); T13(Phospho); K21(Dimethyl)	57	HCD	28	1	2520.1	3	840.706	-1.28	137.38	8909	20110105_LM_HJ_Epac_Rev_007_F28_2.raw
KPApTPAEDDEDDDIDLFGpSDNEEEDK	2	T(4): 100.0; S(19): 100.0	400	P29692	Elongation factor 1-delta OS=Homo sapiens GN=EEF1D PE=1 SV=5 - [EF1D_HUMAN]	1	P29692	T147, S162	Elongation factor 1-delta (EF-1-delta) (Antigen NY-CO-4)	EEF1D EF1D																					Forward	Class I	kPAtPAEDDEDDDIDLFGsDNEEEDk	1	N-Term(Dimethyl); K1(Dimethyl); T4(Phospho); S19(Phospho); K26(Dimethyl)	82	HCD	15	0	3153.23	3	1051.75	1.5	138.42	9543	OR5_101215_LM_HJ_Epac1_007_SCX_Phospho_F15.raw
GFGFGQGAGALVHpSE	1	S(14): 100.0	399	P21291	Cysteine and glycine-rich protein 1 OS=Homo sapiens GN=CSRP1 PE=1 SV=3 - [CSRP1_HUMAN]	1	P21291	S192	Cysteine and glycine-rich protein 1 (Cysteine-rich protein 1) (CRP) (CRP1)	CSRP1 CSRP CYRP																					Reverse	Class I	gFGFGQGAGALVHsE	1	N-Term(Dimethyl); S14(Phospho)	57	HCD	14	0	1541.68	2	771.343	0.24	140.69	11866	20110114_LM_HJ_Epac_Rev_007_F14.raw
STSAPQMpSPGSSDNQSSSPQPAQQK	1	S(1): 0.0; T(2): 0.0; S(3): 0.0; S(8): 100.0; S(11): 0.0; S(12): 0.0; S(16): 0.0; S(17): 0.0; S(18): 0.0	399	Q14157	Ubiquitin-associated protein 2-like OS=Homo sapiens GN=UBAP2L PE=1 SV=2 - [UBP2L_HUMAN]	1	Q14157	S467	Ubiquitin-associated protein 2-like (Protein NICE-4)	UBAP2L KIAA0144 NICE4																					Reverse	Class I	sTSAPQMsPGSSDNQSSSPQPAQQk	1	N-Term(Dimethyl:2H(4)); S8(Phospho); K25(Dimethyl:2H(4))	106	HCD	14	0	2676.21	2	1338.61	0.33	47.12	3396	20110105_LM_HJ_Epac_Rev_007_F14.raw
SHpTSEGAHLDITPNSGAAGNSAGPK	1	S(1): 0.5; T(3): 99.1; S(4): 0.5; T(12): 0.0; S(15): 0.0; S(21): 0.0	399	Q92597	Protein NDRG1 OS=Homo sapiens GN=NDRG1 PE=1 SV=1 - [NDRG1_HUMAN]	1	Q92597	T366	Protein NDRG1 (Differentiation-related gene 1 protein) (DRG-1) (N-myc downstream-regulated gene 1 protein) (Nickel-specific induction protein Cap43) (Reducing agents and tunicamycin-responsive protein) (RTP) (Rit42)	NDRG1 CAP43 DRG1 RTP																					Forward	Class I	sHtSEGAHLDITPNSGAAGNSAGPk	2	N-Term(Dimethyl:2H(4)); T3(Phospho); K25(Dimethyl:2H(4))	102	HCD	31	0	2520.2	2	1260.6	0.43	68.38	4386	OR5_101221_LM_HJ_Epac1_007_SCX_Phospho_F31.raw
RTpSSTLDSEGTFNSYRK	1	T(2): 0.0; S(3): 100.0; S(4): 0.0; T(5): 0.0; S(8): 0.0; T(11): 0.0; S(14): 0.0; Y(15): 0.0	399	Q92609	TBC1 domain family member 5 OS=Homo sapiens GN=TBC1D5 PE=1 SV=1 - [TBCD5_HUMAN]	1	Q92609	S43	TBC1 domain family member 5	TBC1D5 KIAA0210																					Forward	Class I	rTsSTLDSEGTFNSYRk	1	N-Term(Dimethyl); S3(Phospho); K17(Dimethyl)	97	ETD	32	2	2084.97	3	695.66	0.22	79.56	4815	OR5_101217_LM_HJ_Epac1_007_SCX_Phospho_F32.raw
IKpSFDSLGSQSLHTR	1	S(3): 100.0; S(6): 0.0; S(9): 0.0; S(11): 0.0; T(14): 0.0	399	Q14155	Rho guanine nucleotide exchange factor 7 OS=Homo sapiens GN=ARHGEF7 PE=1 SV=2 - [ARHG7_HUMAN]	1	Q14155	S153	Rho guanine nucleotide exchange factor 7 (Beta-Pix) (COOL-1) (PAK-interacting exchange factor beta) (p85)	ARHGEF7 COOL1 KIAA0142 P85SPR PAK3BP PIXB Nbla10314																					Reverse	Class I	iksFDSLGSQSLHTR	1	N-Term(Dimethyl); K2(Dimethyl); S3(Phospho)	97	ETD	32	1	1811.91	3	604.641	1.68	91.12	5551	20110105_LM_HJ_Epac_Rev_007_F32.raw
STAQQELDGKPApSPTPVIVASHTANK	1	S(1): 0.0; T(2): 0.0; S(13): 99.5; T(15): 0.5; S(21): 0.0; T(23): 0.0	399	P35606	Coatomer subunit beta' OS=Homo sapiens GN=COPB2 PE=1 SV=2 - [COPB2_HUMAN]	1	P35606	S859	Coatomer subunit beta' (Beta'-coat protein) (Beta'-COP) (p102)	COPB2																					Forward	Class I	sTAQQELDGkPAsPTPVIVASHTANk	1	N-Term(Dimethyl); K10(Dimethyl); S13(Phospho); K26(Dimethyl)	84	HCD	30	0	2811.44	2	1406.22	2.46	86.81	5831	OR5_101221_LM_HJ_Epac1_007_SCX_Phospho_F30.raw
SLSNpSNPDISGTPTSPDDEVR	1	S(1): 0.0; S(3): 0.0; S(5): 100.0; S(10): 0.0; T(12): 0.0; T(14): 0.0; S(15): 0.0	399	Q96N67	Dedicator of cytokinesis protein 7 OS=Homo sapiens GN=DOCK7 PE=1 SV=4 - [DOCK7_HUMAN]	1	Q96N67	S900	Dedicator of cytokinesis protein 7	DOCK7 KIAA1771																					Forward	Class I	sLSNsNPDISGTPTSPDDEVR	1	N-Term(Dimethyl:2H(4)); S5(Phospho)	125	HCD	14	0	2300.02	2	1150.51	-1.21	86.99	7593	OR5_101215_LM_HJ_Epac1_007_SCX_Phospho_F14.raw
TEpSGEETDLISPPQEEVK	1	T(1): 0.2; S(3): 99.8; T(7): 0.0; S(11): 0.0	399	O43493	Trans-Golgi network integral membrane protein 2 OS=Homo sapiens GN=TGOLN2 PE=1 SV=2 - [TGON2_HUMAN]	1	O43493	S298	Trans-Golgi network integral membrane protein 2 (TGN38 homolog) (TGN46) (TGN48) (Trans-Golgi network protein TGN51)	TGOLN2 TGN46 TGN51																					Forward	Class I	tEsGEETDLISPPQEEVk	1	N-Term(Dimethyl:2H(4)); S3(Phospho); K18(Dimethyl:2H(4))	106	HCD	13	0	2132.01	2	1066.51	0.11	114	8037	OR5_101221_LM_HJ_Epac1_007_SCX_Phospho_F13.raw
YSSTETLKDDDLWSpSR	1	Y(1): 0.0; S(2): 0.0; S(3): 0.0; T(4): 0.0; T(6): 0.0; S(14): 0.1; S(15): 99.9	399	Q96PE2	Rho guanine nucleotide exchange factor 17 OS=Homo sapiens GN=ARHGEF17 PE=1 SV=1 - [ARHGH_HUMAN]	1	Q96PE2	S407	Rho guanine nucleotide exchange factor 17 (164 kDa Rho-specific guanine-nucleotide exchange factor) (p164-RhoGEF) (p164RhoGEF) (Tumor endothelial marker 4)	ARHGEF17 KIAA0337 TEM4																					Forward	Class I	ySSTETLkDDDLWSsR	1	N-Term(Dimethyl); K8(Dimethyl); S15(Phospho)	96	ETD	28	1	2038.9	3	680.305	0.65	120.58	8600	OR5_101217_LM_HJ_Epac1_007_SCX_Phospho_F28.raw
AFQLEEGEEpTEPDCK	1	T(10): 100.0	399	P38432	Coilin OS=Homo sapiens GN=COIL PE=1 SV=1 - [P80C_HUMAN]	1	P38432	T122	Coilin (p80)	COIL CLN80																					Forward	Class I	aFQLEEGEEtEPDck	1	N-Term(Dimethyl:2H(4)); T10(Phospho); C14(Carbamidomethyl); K15(Dimethyl:2H(4))	85	ETD	14	0	1925.83	3	642.616	0.64	103.66	8997	OR5_101215_LM_HJ_Epac1_007_SCX_Phospho_F14.raw
SEpSLDPDSSMDTTLILK	1	S(1): 0.0; S(3): 100.0; S(8): 0.0; S(9): 0.0; T(12): 0.0; T(13): 0.0	398	Q5SW79	Centrosomal protein of 170 kDa OS=Homo sapiens GN=CEP170 PE=1 SV=1 - [CE170_HUMAN]	1	Q5SW79	S881	Centrosomal protein of 170 kDa (Cep170) (KARP-1-binding protein) (KARP1-binding protein)	CEP170 FAM68A KAB KIAA0470																					Reverse	Class I	sEsLDPDSSMDTTLILk	1	N-Term(Dimethyl); S3(Phospho); K17(Dimethyl)	78	ETD	13	0	1987.92	3	663.311	0.26	141.68	10356	20110105_LM_HJ_Epac_Rev_007_F13.raw
NEGSEpSAPEGQAQQR	1	S(4): 0.0; S(6): 100.0	398	P67809	Nuclease-sensitive element-binding protein 1 OS=Homo sapiens GN=YBX1 PE=1 SV=3 - [YBOX1_HUMAN]	1	P67809	S176	Nuclease-sensitive element-binding protein 1 (CCAAT-binding transcription factor I subunit A) (CBF-A) (DNA-binding protein B) (DBPB) (Enhancer factor I subunit A) (EFI-A) (Y-box transcription factor) (Y-box-binding protein 1) (YB-1)	YBX1 NSEP1 YB1																					Reverse	Class I	nEGSEsAPEGQAQQR	1	N-Term(Dimethyl); S6(Phospho)	90	ETD	14	0	1695.7	3	565.904	-0.33	28.57	2073	20110105_LM_HJ_Epac_Rev_007_F14.raw
STPSHGSVSSLNSTGSLpSPK	1	S(1): 0.0; T(2): 0.0; S(4): 0.0; S(7): 0.0; S(9): 0.0; S(10): 0.0; S(13): 0.0; T(14): 0.0; S(16): 0.0; S(18): 100.0	398	Q9UBC2	Epidermal growth factor receptor substrate 15-like 1 OS=Homo sapiens GN=EPS15L1 PE=1 SV=1 - [EP15R_HUMAN]	1	Q9UBC2	S255	Epidermal growth factor receptor substrate 15-like 1 (Eps15-related protein) (Eps15R)	EPS15L1 EPS15R																					Reverse	Class I	sTPSHGSVSSLNSTGSLsPk	1	N-Term(Dimethyl); S18(Phospho); K20(Dimethyl)	92	ETD	28	0	2065.98	3	689.331	-0.78	64.36	4536	20110105_LM_HJ_Epac_Rev_007_F28.raw
STIGVMVTApSHNPEEDNGVK	1	S(1): 0.0; T(2): 0.0; T(8): 0.0; S(10): 100.0	398	O95394	Phosphoacetylglucosamine mutase OS=Homo sapiens GN=PGM3 PE=1 SV=1 - [AGM1_HUMAN]	1	O95394	S64	Phosphoacetylglucosamine mutase (PAGM) (EC 5.4.2.3) (Acetylglucosamine phosphomutase) (N-acetylglucosamine-phosphate mutase) (Phosphoglucomutase-3) (PGM 3)	PGM3 AGM1																					Forward	Class I	sTIGVMVTAsHNPEEDNGVk	1	N-Term(Dimethyl); S10(Phospho); K20(Dimethyl)	88	ETD	27	0	2221.02	3	741.012	0.84	100.27	6622	OR5_101217_LM_HJ_Epac1_007_SCX_Phospho_F27.raw
KLpSLPTDLKPDLDVK	1	S(3): 100.0; T(6): 0.0	398	Q5T5C0	Syntaxin-binding protein 5 OS=Homo sapiens GN=STXBP5 PE=1 SV=1 - [STXB5_HUMAN]	1	Q5T5C0	S759	Syntaxin-binding protein 5 (Lethal(2) giant larvae protein homolog 3) (Tomosyn-1)	STXBP5 LLGL3																					Reverse	Class I	kLsLPTDLkPDLDVk	1	K1(Dimethyl:2H(4)); N-Term(Dimethyl:2H(4)); S3(Phospho); K9(Dimethyl:2H(4)); K15(Dimethyl:2H(4))	92	ETD	30	1	1890.16	3	630.724	-5.04	134.92	8306	20110105_LM_HJ_Epac_Rev_007_F30.raw
TSRAPpSVATVGSICDLNLK	1	T(1): 0.0; S(2): 0.0; S(6): 100.0; T(9): 0.0; S(12): 0.0	398	O75369	Filamin-B OS=Homo sapiens GN=FLNB PE=1 SV=1 - [FLNB_HUMAN]	1	O75369	S2107	Filamin-B (FLN-B) (ABP-278) (ABP-280 homolog) (Actin-binding-like protein) (Beta-filamin) (Filamin homolog 1) (Fh1) (Filamin-3) (Thyroid autoantigen) (Truncated actin-binding protein) (Truncated ABP)	FLNB FLN1L FLN3 TABP TAP																					Reverse	Class I	tSRAPsVATVGSIcDLNLk	1	N-Term(Dimethyl); S6(Phospho); C14(Carbamidomethyl); K19(Dimethyl)	85	ETD	28	1	2125.07	3	709.029	-0.24	132.01	8571	20110105_LM_HJ_Epac_Rev_007_F28_2.raw
TTAGpSVDWTDQLGLR	1	T(1): 0.0; T(2): 0.0; S(5): 100.0; T(9): 0.0	397	Q9C0C2	182 kDa tankyrase 1-binding protein OS=Homo sapiens GN=TNKS1BP1 PE=1 SV=3 - [TB182_HUMAN]	1	Q9C0C2	S1158	182 kDa tankyrase-1-binding protein	TNKS1BP1 KIAA1741 TAB182																					Forward	Class I	tTAGsVDWTDQLGLR	1	N-Term(Dimethyl:2H(4)); S5(Phospho)	107	ETD	14	0	1731.82	3	577.945	-2.73	143.45	10532	OR5_101221_LM_HJ_Epac1_007_SCX_Phospho_F14.raw
NLTANDPSQEYVApSEGEEDPEVEFLK	1	T(3): 0.0; S(8): 0.0; Y(11): 0.0; S(14): 100.0	397	Q86X95	CBF1-interacting corepressor OS=Homo sapiens GN=CIR PE=1 SV=1 - [CIR_HUMAN]	1	Q86X95	S202	Corepressor interacting with RBPJ 1 (CBF1-interacting corepressor) (Recepin)	CIR1 CIR																					Reverse	Class I	nLTANDPSQEYVAsEGEEDPEVEFLk	1	N-Term(Dimethyl); S14(Phospho); K26(Dimethyl)	75	HCD	13	0	3046.35	3	1016.12	0.67	144.98	11759	20110114_LM_HJ_Epac_Rev_007_F13.raw
IDASKNEEDEGHSNpSSPR	1	S(4): 0.0; S(13): 0.0; S(15): 99.7; S(16): 0.3	397	Q14103	Heterogeneous nuclear ribonucleoprotein D0 OS=Homo sapiens GN=HNRNPD PE=1 SV=1 - [HNRPD_HUMAN]	1	Q14103	S82	Heterogeneous nuclear ribonucleoprotein D0 (hnRNP D0) (AU-rich element RNA-binding protein 1)	HNRNPD AUF1 HNRPD																					Reverse	Class I	iDASkNEEDEGHSNSsPR	1	N-Term(Dimethyl:2H(4)); K5(Dimethyl:2H(4)); S16(Phospho)	67	HCD	32	1	2115.94	2	1058.47	-3.43	27.65	2068	20110105_LM_HJ_Epac_Rev_007_F32_2.raw
RSApSASHQADIK	1	S(2): 0.0; S(4): 100.0; S(6): 0.0	397	Q14739	Lamin-B receptor OS=Homo sapiens GN=LBR PE=1 SV=2 - [LBR_HUMAN]	1	Q14739	S99	Lamin-B receptor (Integral nuclear envelope inner membrane protein) (LMN2R)	LBR																					Forward	Class I	rSAsASHQADIk	1	N-Term(Dimethyl); S4(Phospho); K12(Dimethyl)	100	ETD	33	1	1406.68	3	469.563	-2.22	27.64	2128	OR5_101217_LM_HJ_Epac1_007_SCX_Phospho_F33.raw
KSTGpSPTQETQAPFIAK	1	S(2): 0.0; T(3): 0.0; S(5): 100.0; T(7): 0.0; T(10): 0.0	397	O15231	Zinc finger protein 185 OS=Homo sapiens GN=ZNF185 PE=1 SV=2 - [ZN185_HUMAN]	1	O15231	S71	Zinc finger protein 185 (LIM domain protein ZNF185) (P1-A)	ZNF185																					Forward	Class I	kSTGsPTQETQAPFIAk	1	N-Term(Dimethyl); K1(Dimethyl); S5(Phospho); K17(Dimethyl)	82	ETD	28	1	1954.99	3	652.335	0.6	82.05	5731	OR5_101221_LM_HJ_Epac1_007_SCX_Phospho_F28.raw
DLGHPVEEEDELEpSGDQEDEDDESEDPGK	1	S(14): 100.0; S(24): 0.0	397	O60763	General vesicular transport factor p115 OS=Homo sapiens GN=USO1 PE=1 SV=2 - [USO1_HUMAN]	1	O60763	S942	General vesicular transport factor p115 (Protein USO1 homolog) (Transcytosis-associated protein) (TAP) (Vesicle-docking protein)	USO1 VDP																					Forward	Class I	dLGHPVEEEDELEsGDQEDEDDESEDPGk	1	N-Term(Dimethyl); S14(Phospho); K29(Dimethyl)	97	HCD	15	0	3379.3	3	1127.11	0.43	95.82	6833	OR5_101215_LM_HJ_Epac1_007_SCX_Phospho_F15.raw
IEpSDEEEDFENVGK	1	S(3): 100.0	397	Q96T23	Remodeling and spacing factor 1 OS=Homo sapiens GN=RSF1 PE=1 SV=1 - [RSF1_HUMAN]	1	Q96T23	S1335	Remodeling and spacing factor 1 (Rsf-1) (HBV pX-associated protein 8) (Hepatitis B virus X-associated protein) (p325 subunit of RSF chromatin-remodeling complex)	RSF1 HBXAP XAP8																					Forward	Class I	iEsDEEEDFENVGk	1	N-Term(Dimethyl:2H(4)); S3(Phospho); K14(Dimethyl:2H(4))	80	ETD	13	0	1783.78	3	595.264	0.56	108.18	7683	OR5_101221_LM_HJ_Epac1_007_SCX_Phospho_F13.raw
DGEMDRNFDpTLDLPK	1	T(10): 100.0	397	O00192	Armadillo repeat protein deleted in velo-cardio-facial syndrome OS=Homo sapiens GN=ARVCF PE=1 SV=1 - [ARVC_HUMAN]	1	O00192	T642	Armadillo repeat protein deleted in velo-cardio-facial syndrome	ARVCF																					Forward	Class I	dGEMDRNFDtLDLPk	1	N-Term(Dimethyl); T10(Phospho); K15(Dimethyl)	82	ETD	27	1	1901.84	3	634.617	0.1	134.78	8744	OR5_101221_LM_HJ_Epac1_007_SCX_Phospho_F27.raw
RVGTEGLVDpSFSQGLER	1	T(4): 0.0; S(10): 100.0; S(12): 0.0	397	O75170	SAPS domain family member 2 OS=Homo sapiens GN=SAPS2 PE=1 SV=2 - [SAPS2_HUMAN]	1	O75170	S289	Serine/threonine-protein phosphatase 6 regulatory subunit 2 (SAPS domain family member 2)	PPP6R2 KIAA0685 PP6R2 SAPS2																					Forward	Class I	rVGTEGLVDsFSQGLER	1	N-Term(Dimethyl:2H(4)); S10(Phospho)	93	ETD	29	1	1961.96	3	654.659	0.04	133.46	8908	OR5_101217_LM_HJ_Epac1_007_SCX_Phospho_F29.raw
YNSHSLENEpSIKR	1	Y(1): 0.0; S(3): 0.0; S(5): 0.0; S(10): 100.0	396	Q13496	Myotubularin OS=Homo sapiens GN=MTM1 PE=1 SV=2 - [MTM1_HUMAN]	1	Q13496	S18	Myotubularin (EC 3.1.3.64)	MTM1 CG2																					Forward	Class I	yNSHSLENEsIkR	1	N-Term(Dimethyl:2H(4)); S10(Phospho); K12(Dimethyl:2H(4))	96	ETD	33	1	1720.85	3	574.289	0.76	51.67	3449	OR5_101221_LM_HJ_Epac1_007_SCX_Phospho_F33.raw
RADNCpSPVAEEETTGSAESTLPK	1	S(6): 100.0; T(13): 0.0; T(14): 0.0; S(16): 0.0; S(19): 0.0; T(20): 0.0	396	Q9C0D5	Protein TANC1 OS=Homo sapiens GN=TANC1 PE=1 SV=2 - [TANC1_HUMAN]	1	Q9C0D5	S270	Protein TANC1 (Tetratricopeptide repeat, ankyrin repeat and coiled-coil domain-containing protein 1)	TANC1 KIAA1728																					Reverse	Class I	rADNcsPVAEEETTGSAESTLPk	1	N-Term(Dimethyl); C5(Carbamidomethyl); S6(Phospho); K23(Dimethyl)	66	HCD	28	1	2585.14	3	862.385	-1.85	76.59	5351	20110105_LM_HJ_Epac_Rev_007_F28.raw
RVpSISEGDDKIEYR	1	S(3): 100.0; S(5): 0.0; Y(13): 0.0	396	P22087	rRNA 2'-O-methyltransferase fibrillarin OS=Homo sapiens GN=FBL PE=1 SV=2 - [FBRL_HUMAN]	1	P22087	S124	rRNA 2'-O-methyltransferase fibrillarin (EC 2.1.1.-) (34 kDa nucleolar scleroderma antigen)	FBL FIB1 FLRN																					Forward	Class I	rVsISEGDDkIEYR	1	N-Term(Dimethyl:2H(4)); S3(Phospho); K10(Dimethyl:2H(4))	94	ETD	32	2	1810.92	3	604.312	1.13	90.21	5378	OR5_101217_LM_HJ_Epac1_007_SCX_Phospho_F32.raw
YFQISQDEDEpSESED	1	Y(1): 0.0; S(5): 0.0; S(11): 100.0; S(13): 0.0	396	Q6P5R6	60S ribosomal protein L22-like 1 OS=Homo sapiens GN=RPL22L1 PE=1 SV=2 - [RL22L_HUMAN]	1	Q6P5R6	S118	60S ribosomal protein L22-like 1	RPL22L1																					Reverse	Class I	yFQISQDEDEsESED	1	N-Term(Dimethyl); S11(Phospho)	79	ETD	5	0	1928.7	3	643.57	0.22	70.96	5427	20110105_LM_HJ_Epac_Rev_007_F5.raw
RMpSDEFVDSFKK	1	S(3): 100.0; S(9): 0.0	396	Q92934	Bcl2 antagonist of cell death OS=Homo sapiens GN=BAD PE=1 SV=3 - [BAD_HUMAN]	1	Q92934	S118	Bcl2 antagonist of cell death (BAD) (Bcl-2-binding component 6) (Bcl-2-like protein 8) (Bcl2-L-8) (Bcl-XL/Bcl-2-associated death promoter)	BAD BBC6 BCL2L8																					Reverse	Class I	rmsDEFVDSFkk	1	N-Term(Dimethyl); M2(Oxidation); S3(Phospho); K11(Dimethyl); K12(Dimethyl)	66	ETD	32	2	1668.77	3	556.928	-1.03	98.09	5607	20110105_LM_HJ_Epac_Rev_007_F32_2.raw
QPLLLpSEDEEDTKR	1	S(6): 100.0; T(12): 0.0	396	Q99613	Eukaryotic translation initiation factor 3 subunit C OS=Homo sapiens GN=EIF3C PE=1 SV=1 - [EIF3C_HUMAN]	1	Q99613	S39	Eukaryotic translation initiation factor 3 subunit C (eIF3c) (Eukaryotic translation initiation factor 3 subunit 8) (eIF3 p110)	EIF3C EIF3S8; EIF3CL																					Forward	Class I	qPLLLsEDEEDTkR	1	N-Term(Dimethyl); S6(Phospho); K13(Dimethyl)	57	ETD	28	1	1808.87	3	603.628	0.07	94.48	6545	OR5_101221_LM_HJ_Epac1_007_SCX_Phospho_F28.raw
KEEpSEEpSDDDMGFGLFD	2	S(4): 100.0; S(7): 100.0	396	P05386;P05387	60S acidic ribosomal protein P1 OS=Homo sapiens GN=RPLP1 PE=1 SV=1 - [RLA1_HUMAN]|60S acidic ribosomal protein P2 OS=Homo sapiens GN=RPLP2 PE=1 SV=1 - [RLA2_HUMAN]	2	P05386	S101, S104	60S acidic ribosomal protein P1	RPLP1 RRP1	P05387	S102, S105	60S acidic ribosomal protein P2 (Renal carcinoma antigen NY-REN-44)	RPLP2 D11S2243E RPP2																	Reverse	Class I	kEEsEEsDDDMGFGLFD	1	K1(Dimethyl); N-Term(Dimethyl); S4(Phospho); S7(Phospho)	91	ETD	7	1	2165.76	3	722.591	1.24	99.76	6979	20110105_LM_HJ_Epac_Rev_007_F7.raw
LTQYHGGpSLPNVSQLR	1	T(2): 0.0; Y(4): 0.0; S(8): 100.0; S(13): 0.0	396	Q6UUV7	CREB-regulated transcription coactivator 3 OS=Homo sapiens GN=CRTC3 PE=1 SV=2 - [CRTC3_HUMAN]	1	Q6UUV7	S62	CREB-regulated transcription coactivator 3 (Transducer of regulated cAMP response element-binding protein 3) (TORC-3) (Transducer of CREB protein 3)	CRTC3 TORC3																					Reverse	Class I	lTQYHGGsLPNVSQLR	1	N-Term(Dimethyl:2H(4)); S8(Phospho)	75	ETD	28	0	1881.95	3	627.987	-3.49	115.4	7645	20110105_LM_HJ_Epac_Rev_007_F28_2.raw
SISSpSNPDLAVAPGSVDDEVSR	1	S(1): 0.0; S(3): 0.0; S(4): 0.3; S(5): 99.7; S(15): 0.0; S(21): 0.0	396	Q96HP0	Dedicator of cytokinesis protein 6 OS=Homo sapiens GN=DOCK6 PE=1 SV=2 - [DOCK6_HUMAN]	1	Q96HP0	S884	Dedicator of cytokinesis protein 6	DOCK6 KIAA1395																					Reverse	Class I	sISSsNPDLAVAPGSVDDEVSR	1	N-Term(Dimethyl:2H(4)); S5(Phospho)	109	HCD	13	0	2314.08	2	1157.54	1.2	113.86	8357	20110105_LM_HJ_Epac_Rev_007_F13.raw
ESFLYRSDpSDYDLSPK	1	S(2): 0.0; Y(5): 0.0; S(7): 0.0; S(9): 100.0; Y(11): 0.0; S(14): 0.0	396	Q08499;Q07343	cAMP-specific 3',5'-cyclic phosphodiesterase 4D OS=Homo sapiens GN=PDE4D PE=1 SV=2 - [PDE4D_HUMAN]|cAMP-specific 3',5'-cyclic phosphodiesterase 4B OS=Homo sapiens GN=PDE4B PE=1 SV=1 - [PDE4B_HUMAN]	2	Q08499	S197	cAMP-specific 3',5'-cyclic phosphodiesterase 4D (EC 3.1.4.17) (DPDE3) (PDE43)	PDE4D DPDE3	Q07343		cAMP-specific 3',5'-cyclic phosphodiesterase 4B (EC 3.1.4.17) (DPDE4) (PDE32)	PDE4B DPDE4																	Forward	Class I	eSFLYRSDsDYDLSPk	1	N-Term(Dimethyl); S9(Phospho); K16(Dimethyl)	79	ETD	28	1	2057.91	3	686.642	0.91	128.93	8759	OR5_101221_LM_HJ_Epac1_007_SCX_Phospho_F28.raw
VELQELNDRFANpYIDK	1	Y(13): 100.0	396	P08670	Vimentin OS=Homo sapiens GN=VIM PE=1 SV=4 - [VIME_HUMAN]	1	P08670	Y117	Vimentin	VIM																					Reverse	Class I	vELQELNDRFANyIDk	1	N-Term(Dimethyl); Y13(Phospho); K16(Dimethyl)	91	ETD	28	1	2103.01	3	701.676	-1.56	140.31	9107	20110105_LM_HJ_Epac_Rev_007_F28_2.raw
IGEEQpSAEDAEDGPPELLFIHGGHTAK	1	S(6): 100.0; T(25): 0.0	396	Q16576	Histone-binding protein RBBP7 OS=Homo sapiens GN=RBBP7 PE=1 SV=1 - [RBBP7_HUMAN]	1	Q16576	S354	Histone-binding protein RBBP7 (Histone acetyltransferase type B subunit 2) (Nucleosome-remodeling factor subunit RBAP46) (Retinoblastoma-binding protein 7) (RBBP-7) (Retinoblastoma-binding protein p46)	RBBP7 RBAP46																					Forward	Class I	iGEEQsAEDAEDGPPELLFIHGGHTAk	1	N-Term(Dimethyl:2H(4)); S6(Phospho); K27(Dimethyl:2H(4))	66	HCD	30	0	2991.43	3	997.814	1.58	138.34	9349	OR5_101217_LM_HJ_Epac1_007_SCX_Phospho_F30.raw
ISSGKSpSPFKVpSPLTFGR	2	S(2): 0.0; S(3): 0.0; S(6): 0.0; S(7): 100.0; S(12): 100.0; T(15): 0.0	396	O95810	Serum deprivation-response protein OS=Homo sapiens GN=SDPR PE=1 SV=3 - [SDPR_HUMAN]	1	O95810	S288, S293	Serum deprivation-response protein (Cavin-2) (PS-p68) (Phosphatidylserine-binding protein)	SDPR																					Forward	Class I	iSSGkSsPFkVsPLTFGR	1	N-Term(Dimethyl); K5(Dimethyl); S7(Phospho); K10(Dimethyl); S12(Phospho)	55	ETD	28	2	2139.07	4	535.523	2.01	135.93	9654	OR5_101217_LM_HJ_Epac1_007_SCX_Phospho_F28.raw
LTQTSpSTEQLNVLETETEVLNK	1	T(2): 0.0; T(4): 0.0; S(5): 0.3; S(6): 99.5; T(7): 0.3; T(15): 0.0; T(17): 0.0	396	Q5JSH3	WD repeat-containing protein 44 OS=Homo sapiens GN=WDR44 PE=1 SV=1 - [WDR44_HUMAN]	1	Q5JSH3	S162	WD repeat-containing protein 44 (Rabphilin-11)	WDR44																					Forward	Class I	lTQTSsTEQLNVLETETEVLNk	1	N-Term(Dimethyl:2H(4)); S6(Phospho); K22(Dimethyl:2H(4))	126	HCD	13	0	2621.35	2	1311.18	2.57	145.01	9919	OR5_101216_LM_HJ_Epac1_007_SCX_Phospho_F13.raw
SApSQSpSLDKLDQELK	2	S(1): 0.0; S(3): 100.0; S(5): 0.0; S(6): 100.0	395	O60271	C-jun-amino-terminal kinase-interacting protein 4 OS=Homo sapiens GN=SPAG9 PE=1 SV=4 - [JIP4_HUMAN]	1	O60271	S730, S733	C-Jun-amino-terminal kinase-interacting protein 4 (JIP-4) (JNK-interacting protein 4) (Cancer/testis antigen 89) (CT89) (Human lung cancer oncogene 6 protein) (HLC-6) (JNK-associated leucine-zipper protein) (JLP) (Mitogen-activated protein kinase 8-interacting protein 4) (Proliferation-inducing protein 6) (Protein highly expressed in testis) (PHET) (Sperm surface protein) (Sperm-associated antige…	SPAG9 HSS KIAA0516 MAPK8IP4 SYD1 HLC6																					Forward	Class I	sAsQSsLDkLDQELk	1	N-Term(Dimethyl:2H(4)); S3(Phospho); S6(Phospho); K9(Dimethyl:2H(4)); K15(Dimethyl:2H(4))	106	ETD	14	1	1904.94	3	635.652	0.51	124.92	10693	OR5_101215_LM_HJ_Epac1_007_SCX_Phospho_F14.raw
SSSISEEKGDpSDDEKPR	1	S(1): 0.0; S(2): 0.0; S(3): 0.0; S(5): 0.0; S(11): 100.0	395	Q9UKV3	Apoptotic chromatin condensation inducer in the nucleus OS=Homo sapiens GN=ACIN1 PE=1 SV=1 - [ACINU_HUMAN]	1	Q9UKV3	S216	Apoptotic chromatin condensation inducer in the nucleus (Acinus)	ACIN1 ACINUS KIAA0670																					Reverse	Class I	sSSISEEkGDsDDEkPR	1	N-Term(Dimethyl:2H(4)); K8(Dimethyl:2H(4)); S11(Phospho); K15(Dimethyl:2H(4))	84	ETD	31	1	2041.96	3	681.324	-6.5	27.9	1902	20110105_LM_HJ_Epac_Rev_007_F31.raw
GHYEVTGpSDDETGK	1	Y(3): 0.0; T(6): 0.0; S(8): 100.0; T(12): 0.0	395	Q09666	Neuroblast differentiation-associated protein AHNAK OS=Homo sapiens GN=AHNAK PE=1 SV=2 - [AHNK_HUMAN]	1	Q09666	S5841	Neuroblast differentiation-associated protein AHNAK (Desmoyokin)	AHNAK PM227																					Reverse	Class I	gHYEVTGsDDETGk	1	N-Term(Dimethyl:2H(4)); S8(Phospho); K14(Dimethyl:2H(4))	88	ETD	29	0	1638.7	3	546.906	-6.91	38.85	2582	20110105_LM_HJ_Epac_Rev_007_F29.raw
EREVDEDpSEPEREVR	1	S(8): 100.0	395	Q53GS9	U4/U6.U5 tri-snRNP-associated protein 2 OS=Homo sapiens GN=USP39 PE=1 SV=2 - [SNUT2_HUMAN]	1	Q53GS9	S82	U4/U6.U5 tri-snRNP-associated protein 2 (Inactive ubiquitin-specific peptidase 39) (SAD1 homolog) (U4/U6.U5 tri-snRNP-associated 65 kDa protein) (65K)	USP39 CGI-21 HSPC332 PRO2855																					Reverse	Class I	eREVDEDsEPEREVR	1	N-Term(Dimethyl); S8(Phospho)	71	ETD	33	2	1981.85	3	661.288	-0.97	44.16	2984	20110105_LM_HJ_Epac_Rev_007_F33.raw
EKLQEEGGGpSDEEETGSPSEDGMQSAR	1	S(10): 100.0; T(15): 0.0; S(17): 0.0; S(19): 0.0; S(25): 0.0	395	Q13610	Periodic tryptophan protein 1 homolog OS=Homo sapiens GN=PWP1 PE=1 SV=1 - [PWP1_HUMAN]	1	Q13610	S50	Periodic tryptophan protein 1 homolog (Keratinocyte protein IEF SSP 9502)	PWP1																					Reverse	Class I	ekLQEEGGGsDEEETGSPSEDGmQSAR	1	N-Term(Dimethyl:2H(4)); K2(Dimethyl:2H(4)); S10(Phospho); M23(Oxidation)	71	HCD	28	1	2999.26	3	1000.43	2.09	50.24	3792	20110114_LM_HJ_Epac_Rev_007_F28.raw
VISSIEQKTpSADGNEK	1	S(3): 0.0; S(4): 0.0; T(9): 0.0; S(10): 100.0	395	P61981	14-3-3 protein gamma OS=Homo sapiens GN=YWHAG PE=1 SV=2 - [1433G_HUMAN]	1	P61981	S71	14-3-3 protein gamma (Protein kinase C inhibitor protein 1) (KCIP-1) [Cleaved into: 14-3-3 protein gamma, N-terminally processed]	YWHAG																					Reverse	Class I	vISSIEQkTsADGNEk	1	N-Term(Dimethyl:2H(4)); K8(Dimethyl:2H(4)); S10(Phospho); K16(Dimethyl:2H(4))	87	ETD	28	1	1881.99	3	628.002	-2.84	53.89	3817	20110105_LM_HJ_Epac_Rev_007_F28_2.raw
HAIMRpSPQMVSAIVR	1	S(6): 100.0; S(11): 0.0	395	P35222	Catenin beta-1 OS=Homo sapiens GN=CTNNB1 PE=1 SV=1 - [CTNB1_HUMAN]	1	P35222	S191	Catenin beta-1 (Beta-catenin)	CTNNB1 CTNNB OK/SW-cl.35 PRO2286																					Forward	Class I	hAImRsPQmVSAIVR	1	N-Term(Dimethyl:2H(4)); M4(Oxidation); S6(Phospho); M9(Oxidation)	97	ETD	33	1	1839.93	3	613.981	0.12	62.98	4018	OR5_101221_LM_HJ_Epac1_007_SCX_Phospho_F33.raw
EVKAEEKpSPISINVK	1	S(8): 100.0; S(11): 0.0	395	Q9UK58	Cyclin-L1 OS=Homo sapiens GN=CCNL1 PE=1 SV=1 - [CCNL1_HUMAN]	1	Q9UK58	S352	Cyclin-L1 (Cyclin-L)	CCNL1 BM-001 UNQ530/PRO1073																					Forward	Class I	eVkAEEksPISINVk	1	N-Term(Dimethyl); K3(Dimethyl); K7(Dimethyl); S8(Phospho); K15(Dimethyl)	101	ETD	31	2	1863.03	3	621.68	1.58	83.08	5199	OR5_101217_LM_HJ_Epac1_007_SCX_Phospho_F31.raw
HYEDGYPGGSDNYGpSLSR	1	Y(2): 0.0; Y(6): 0.0; S(10): 0.0; Y(13): 0.0; S(15): 100.0; S(17): 0.0	395	O60716	Catenin delta-1 OS=Homo sapiens GN=CTNND1 PE=1 SV=1 - [CTND1_HUMAN]	1	O60716	S230	Catenin delta-1 (Cadherin-associated Src substrate) (CAS) (p120 catenin) (p120(ctn)) (p120(cas))	CTNND1 KIAA0384																					Forward	Class I	hYEDGYPGGSDNYGsLSR	1	N-Term(Dimethyl); S15(Phospho)	89	ETD	30	0	2081.83	3	694.614	1.29	83.91	5812	OR5_101217_LM_HJ_Epac1_007_SCX_Phospho_F30.raw
THpSTSSSLGSGESPFSR	1	T(1): 0.0; S(3): 100.0; T(4): 0.0; S(5): 0.0; S(6): 0.0; S(7): 0.0; S(10): 0.0; S(13): 0.0; S(16): 0.0	395	Q9UGV2	Protein NDRG3 OS=Homo sapiens GN=NDRG3 PE=2 SV=2 - [NDRG3_HUMAN]	1	Q9UGV2	S331	Protein NDRG3 (N-myc downstream-regulated gene 3 protein)	NDRG3																					Reverse	Class I	tHsTSSSLGSGESPFSR	1	N-Term(Dimethyl); S3(Phospho)	110	ETD	28	0	1831.78	3	611.265	-2.34	84.73	5831	20110105_LM_HJ_Epac_Rev_007_F28_2.raw
ASQpSRPNSSALETLGGEK	1	S(2): 0.0; S(4): 100.0; S(8): 0.0; S(9): 0.0; T(13): 0.0	395	O94804	Serine/threonine-protein kinase 10 OS=Homo sapiens GN=STK10 PE=1 SV=1 - [STK10_HUMAN]	1	O94804	S450	Serine/threonine-protein kinase 10 (EC 2.7.11.1) (Lymphocyte-oriented kinase)	STK10 LOK																					Forward	Class I	aSQsRPNSSALETLGGEk	1	N-Term(Dimethyl); S4(Phospho); K18(Dimethyl)	99	ETD	28	0	1967.94	3	656.652	-0.69	87.35	6072	OR5_101221_LM_HJ_Epac1_007_SCX_Phospho_F28.raw
GFGQSNpSLPTAGSVGGGMGR	1	S(5): 0.0; S(7): 100.0; T(10): 0.0; S(13): 0.0	395	Q9UPU9	Sterile alpha motif domain-containing protein 4A OS=Homo sapiens GN=SAMD4A PE=1 SV=2 - [SAM4A_HUMAN]	1	Q9UPU9	S391	Protein Smaug homolog 1 (Smaug 1) (hSmaug1) (Sterile alpha motif domain-containing protein 4A) (SAM domain-containing protein 4A)	SAMD4A KIAA1053 SAMD4 SMAUG1																					Forward	Class I	gFGQSNsLPTAGSVGGGmGR	1	N-Term(Dimethyl); S7(Phospho); M18(Oxidation)	99	ETD	14	0	1960.86	3	654.291	0.06	96.34	7118	OR5_101221_LM_HJ_Epac1_007_SCX_Phospho_F14.raw
TAAILHGGpSPDFVGNGK	1	T(1): 0.0; S(9): 100.0	395	Q9P2K8	Eukaryotic translation initiation factor 2-alpha kinase 4 OS=Homo sapiens GN=EIF2AK4 PE=1 SV=2 - [E2AK4_HUMAN]	1	Q9P2K8	S230	Eukaryotic translation initiation factor 2-alpha kinase 4 (EC 2.7.11.1) (GCN2-like protein)	EIF2AK4 GCN2 KIAA1338																					Forward	Class I	tAAILHGGsPDFVGNGk	1	N-Term(Dimethyl:2H(4)); S9(Phospho); K17(Dimethyl:2H(4))	90	ETD	28	0	1784.92	3	595.644	0.3	102.56	7371	OR5_101217_LM_HJ_Epac1_007_SCX_Phospho_F28.raw
TPLGApSLDEQSSSTLK	1	T(1): 0.0; S(6): 100.0; S(11): 0.0; S(12): 0.0; S(13): 0.0; T(14): 0.0	395	P28290	Sperm-specific antigen 2 OS=Homo sapiens GN=SSFA2 PE=1 SV=3 - [SSFA2_HUMAN]	1	P28290	S92	Sperm-specific antigen 2 (Cleavage signal-1 protein) (CS-1) (Ki-ras-induced actin-interacting protein)	SSFA2 CS1 KIAA1927 KRAP																					Reverse	Class I	tPLGAsLDEQSSSTLk	1	N-Term(Dimethyl:2H(4)); S6(Phospho); K16(Dimethyl:2H(4))	77	ETD	14	0	1777.91	3	593.307	0.34	100.43	7697	20110105_LM_HJ_Epac_Rev_007_F14.raw
NRPDYVpSEEEEDDEDFETAVK	1	Y(5): 0.0; S(7): 100.0; T(18): 0.0	395	P49792	E3 SUMO-protein ligase RanBP2 OS=Homo sapiens GN=RANBP2 PE=1 SV=2 - [RBP2_HUMAN]	1	P49792	S2668	E3 SUMO-protein ligase RanBP2 (EC 6.3.2.-) (358 kDa nucleoporin) (Nuclear pore complex protein Nup358) (Nucleoporin Nup358) (Ran-binding protein 2) (RanBP2) (p270) [Includes: Putative peptidyl-prolyl cis-trans isomerase (PPIase) (EC 5.2.1.8) (Rotamase)]	RANBP2 NUP358																					Reverse	Class I	nRPDYVsEEEEDDEDFETAVk	1	N-Term(Dimethyl:2H(4)); S7(Phospho); K21(Dimethyl:2H(4))	90	HCD	28	0	2660.13	3	887.383	-1.39	119.98	7903	20110105_LM_HJ_Epac_Rev_007_F28_2.raw
pSKSPPKVPIVIQDDSLPAGPPPQIR	1	S(1): 99.4; S(3): 0.6; S(15): 0.0	395	Q7Z422	UPF0485 protein C1orf144 OS=Homo sapiens GN=C1orf144 PE=1 SV=1 - [CA144_HUMAN]	1	Q7Z422	S37	UPF0485 protein C1orf144 (Putative MAPK-activating protein PM18/PM20/PM22)	C1orf144																					Reverse	Class I	skSPPkVPIVIQDDSLPAGPPPQIR	1	N-Term(Dimethyl); S1(Phospho); K2(Dimethyl); K6(Dimethyl)	77	HCD	30	2	2800.53	3	934.181	-3.68	131.63	8070	20110105_LM_HJ_Epac_Rev_007_F30.raw
QASASYDpSEEEEEGLPMSYDEK	1	S(3): 0.0; S(5): 0.0; Y(6): 0.0; S(8): 100.0; S(18): 0.0; Y(19): 0.0	395	Q15059	Bromodomain-containing protein 3 OS=Homo sapiens GN=BRD3 PE=1 SV=1 - [BRD3_HUMAN]	1	Q15059	S563	Bromodomain-containing protein 3 (RING3-like protein)	BRD3 KIAA0043 RING3L																					Reverse	Class I	qASASYDsEEEEEGLPmSYDEk	1	N-Term(Dimethyl:2H(4)); S8(Phospho); M17(Oxidation); K22(Dimethyl:2H(4))	47	HCD	13	0	2654.08	3	885.365	-0.88	101.85	8093	20110114_LM_HJ_Epac_Rev_007_F13.raw
IYSFTDNAPpSPSIGGSSR	1	Y(2): 0.0; S(3): 0.0; T(5): 0.0; S(10): 100.0; S(12): 0.0; S(16): 0.0; S(17): 0.0	395	O15014	Zinc finger protein 609 OS=Homo sapiens GN=ZNF609 PE=1 SV=2 - [ZN609_HUMAN]	1	O15014	S804	Zinc finger protein 609	ZNF609 KIAA0295																					Forward	Class I	iYSFTDNAPsPSIGGSSR	1	N-Term(Dimethyl:2H(4)); S10(Phospho)	78	ETD	14	0	1967.91	3	656.64	0.49	120.54	8810	OR5_101221_LM_HJ_Epac1_007_SCX_Phospho_F14.raw
SANGGSEpSDGEENIGWSTVNLDEEK	1	S(1): 0.0; S(6): 0.0; S(8): 100.0; S(17): 0.0; T(18): 0.0	394	O43290	U4/U6.U5 tri-snRNP-associated protein 1 OS=Homo sapiens GN=SART1 PE=1 SV=1 - [SNUT1_HUMAN]	1	O43290	S598	U4/U6.U5 tri-snRNP-associated protein 1 (SNU66 homolog) (hSnu66) (Squamous cell carcinoma antigen recognized by T-cells 1) (SART-1) (hSART-1) (U4/U6.U5 tri-snRNP-associated 110 kDa protein) (allergen Hom s 1)	SART1																					Reverse	Class I	sANGGSEsDGEENIGWSTVNLDEEk	1	N-Term(Dimethyl:2H(4)); S8(Phospho); K25(Dimethyl:2H(4))	81	HCD	13	0	2768.2	3	923.406	0.48	139.45	11256	20110114_LM_HJ_Epac_Rev_007_F13.raw
IILDLISEpSPIK	1	S(7): 0.0; S(9): 100.0	394	P61978	Heterogeneous nuclear ribonucleoprotein K OS=Homo sapiens GN=HNRNPK PE=1 SV=1 - [HNRPK_HUMAN]	1	P61978	S216	Heterogeneous nuclear ribonucleoprotein K (hnRNP K) (Transformation up-regulated nuclear protein) (TUNP)	HNRNPK HNRPK																					Forward	Class I	iILDLISEsPIk	1	N-Term(Dimethyl:2H(4)); S9(Phospho); K12(Dimethyl:2H(4))	63	ETD	14	0	1484.88	3	495.632	-1.09	158.9	13370	OR5_101215_LM_HJ_Epac1_007_SCX_Phospho_F14.raw
AAQQAASSSGQGQQAQpTPTGK	1	S(7): 0.0; S(8): 0.0; S(9): 0.0; T(17): 100.0; T(19): 0.0	394	P48729	Casein kinase I isoform alpha OS=Homo sapiens GN=CSNK1A1 PE=1 SV=2 - [KC1A_HUMAN]	1	P48729	T321	Casein kinase I isoform alpha (CKI-alpha) (EC 2.7.11.1) (CK1)	CSNK1A1																					Reverse	Class I	aAQQAASSSGQGQQAQtPTGk	1	N-Term(Dimethyl:2H(4)); T17(Phospho); K21(Dimethyl:2H(4))	106	ETD	14	0	2146.04	3	716.017	-0.36	26.32	1953	20110105_LM_HJ_Epac_Rev_007_F14.raw
KFDHESpSPGTDEDK	1	S(6): 0.0; S(7): 100.0; T(10): 0.0	394	Q13427	Peptidyl-prolyl cis-trans isomerase G OS=Homo sapiens GN=PPIG PE=1 SV=1 - [PPIG_HUMAN]	1	Q13427	S745	Peptidyl-prolyl cis-trans isomerase G (PPIase G) (Peptidyl-prolyl isomerase G) (EC 5.2.1.8) (CASP10) (Clk-associating RS-cyclophilin) (CARS-Cyp) (CARS-cyclophilin) (SR-cyclophilin) (SR-cyp) (SRcyp) (Cyclophilin G) (Rotamase G)	PPIG																					Reverse	Class I	kFDHESsPGTDEDk	1	N-Term(Dimethyl); K1(Dimethyl); S7(Phospho); K14(Dimethyl)	72	ETD	33	1	1755.75	3	585.921	-0.19	33.25	2380	20110105_LM_HJ_Epac_Rev_007_F33_2.raw
AHpSPAEGASVESSSPGPK	1	S(3): 100.0; S(9): 0.0; S(12): 0.0; S(13): 0.0; S(14): 0.0	394	Q8NFG4	Folliculin OS=Homo sapiens GN=FLCN PE=1 SV=1 - [FLCN_HUMAN]	1	Q8NFG4	S62	Folliculin (BHD skin lesion fibrofolliculoma protein) (Birt-Hogg-Dube syndrome protein)	FLCN BHD																					Forward	Class I	aHsPAEGASVESSSPGPk	1	N-Term(Dimethyl:2H(4)); S3(Phospho); K18(Dimethyl:2H(4))	98	HCD	28	0	1838.88	2	919.943	0.66	38.11	2800	OR5_101221_LM_HJ_Epac1_007_SCX_Phospho_F28.raw
KVELpSEpSEEDKGGK	2	S(5): 100.0; S(7): 100.0	394	Q8IYB3	Serine/arginine repetitive matrix protein 1 OS=Homo sapiens GN=SRRM1 PE=1 SV=2 - [SRRM1_HUMAN]	1	Q8IYB3	S463, S465	Serine/arginine repetitive matrix protein 1 (SR-related nuclear matrix protein of 160 kDa) (SRm160) (Ser/Arg-related nuclear matrix protein)	SRRM1 SRM160																					Reverse	Class I	kVELsEsEEDkGGk	1	N-Term(Dimethyl:2H(4)); K1(Dimethyl:2H(4)); S5(Phospho); S7(Phospho); K11(Dimethyl:2H(4)); K14(Dimethyl:2H(4))	74	ETD	29	2	1822.92	3	608.31	-0.84	44.36	3192	20110105_LM_HJ_Epac_Rev_007_F29_2.raw
QApSEQNWANYpSAEQNR	2	S(3): 100.0; Y(10): 0.0; S(11): 100.0	394	P17302	Gap junction alpha-1 protein OS=Homo sapiens GN=GJA1 PE=1 SV=2 - [CXA1_HUMAN]	1	P17302	S306, S314	Gap junction alpha-1 protein (Connexin-43) (Cx43) (Gap junction 43 kDa heart protein)	GJA1 GJAL																					Reverse	Class I	qAsEQNWANYsAEQNR	1	N-Term(Dimethyl); S3(Phospho); S11(Phospho)	67	ETD	7	0	2083.79	3	695.268	-1.04	60.52	4205	20110105_LM_HJ_Epac_Rev_007_F7.raw
SLASKDVEpSPSWR	1	S(1): 0.0; S(4): 0.0; S(9): 100.0; S(11): 0.0	394	O00159	Myosin-Ic OS=Homo sapiens GN=MYO1C PE=1 SV=2 - [MYO1C_HUMAN]	1	O00159	S373	Unconventional myosin-Ic (Myosin I beta) (MMI-beta) (MMIb)	MYO1C																					Reverse	Class I	sLASkDVEsPSWR	1	N-Term(Dimethyl); K5(Dimethyl); S9(Phospho)	67	ETD	29	1	1597.75	3	533.254	-10.12	80.84	4911	20110105_LM_HJ_Epac_Rev_007_F29.raw
SIpSNEGLTLNNSHVSK	1	S(1): 0.1; S(3): 99.9; T(8): 0.0; S(12): 0.0; S(15): 0.0	394	Q08AD1	Calmodulin-regulated spectrin-associated protein 1-like protein 1 OS=Homo sapiens GN=CAMSAP1L1 PE=1 SV=2 - [CA1L1_HUMAN]	1	Q08AD1	S464	Calmodulin-regulated spectrin-associated protein 2 (Calmodulin-regulated spectrin-associated protein 1-like protein 1)	CAMSAP2 CAMSAP1L1 KIAA1078																					Reverse	Class I	sIsNEGLTLNNSHVSk	1	N-Term(Dimethyl:2H(4)); S3(Phospho); K16(Dimethyl:2H(4))	95	ETD	28	0	1843.94	3	615.317	-2.58	91.08	6211	20110105_LM_HJ_Epac_Rev_007_F28_2.raw
RNpTIDSTSSFSQFR	1	T(3): 100.0; S(6): 0.0; T(7): 0.0; S(8): 0.0; S(9): 0.0; S(11): 0.0	394	Q8TDN4	CDK5 and ABL1 enzyme substrate 1 OS=Homo sapiens GN=CABLES1 PE=1 SV=2 - [CABL1_HUMAN]	1	Q8TDN4	T415	CDK5 and ABL1 enzyme substrate 1 (Interactor with CDK3 1) (Ik3-1)	CABLES1 CABLES																					Reverse	Class I	rNtIDSTSSFSQFR	1	N-Term(Dimethyl); T3(Phospho)	91	ETD	29	1	1753.79	3	585.269	0.83	100.43	6776	20110105_LM_HJ_Epac_Rev_007_F29_2.raw
TApSISSSPSEGTPTVGSYGCTPQSLPK	1	T(1): 0.7; S(3): 99.3; S(5): 0.0; S(6): 0.0; S(7): 0.0; S(9): 0.0; T(12): 0.0; T(14): 0.0; S(17): 0.0; Y(18): 0.0; T(21): 0.0; S(24): 0.0	394	Q6PKG0	La-related protein 1 OS=Homo sapiens GN=LARP1 PE=1 SV=2 - [LARP1_HUMAN]	1	Q6PKG0	S847	La-related protein 1 (La ribonucleoprotein domain family member 1)	LARP1 KIAA0731 LARP																					Reverse	Class I	tAsISSSPSEGTPTVGSYGcTPQSLPk	1	N-Term(Dimethyl); S3(Phospho); C20(Carbamidomethyl); K27(Dimethyl)	73	HCD	13	0	2832.31	3	944.774	1.81	109.17	8039	20110105_LM_HJ_Epac_Rev_007_F13.raw
ATNEpSEDEIPQLVPIGK	1	T(2): 0.0; S(5): 100.0	393	O76021	Ribosomal L1 domain-containing protein 1 OS=Homo sapiens GN=RSL1D1 PE=1 SV=3 - [RL1D1_HUMAN]	1	O76021	S361	Ribosomal L1 domain-containing protein 1 (CATX-11) (Cellular senescence-inhibited gene protein) (Protein PBK1)	RSL1D1 CATX11 CSIG PBK1 L12																					Forward	Class I	aTNEsEDEIPQLVPIGk	1	N-Term(Dimethyl); S5(Phospho); K17(Dimethyl)	78	HCD	13	0	1975.97	2	988.487	1.78	141.64	10006	OR5_101221_LM_HJ_Epac1_007_SCX_Phospho_F13.raw
RSQpSIEQESQEK	1	S(2): 0.0; S(4): 100.0; S(9): 0.0	393	Q5VTL8	Pre-mRNA-splicing factor 38B OS=Homo sapiens GN=PRPF38B PE=1 SV=1 - [PR38B_HUMAN]	1	Q5VTL8	S529	Pre-mRNA-splicing factor 38B (Sarcoma antigen NY-SAR-27)	PRPF38B																					Forward	Class I	rSQsIEQESQEk	1	N-Term(Dimethyl); S4(Phospho); K12(Dimethyl)	56	ETD	29	1	1584.73	3	528.914	0.56	31.21	2390	OR5_101221_LM_HJ_Epac1_007_SCX_Phospho_F29.raw
AGDTpSDQEGHSLEEK	1	T(4): 0.0; S(5): 100.0; S(11): 0.0	393	Q99607	ETS-related transcription factor Elf-4 OS=Homo sapiens GN=ELF4 PE=1 SV=1 - [ELF4_HUMAN]	1	Q99607	S151	ETS-related transcription factor Elf-4 (E74-like factor 4) (Myeloid Elf-1-like factor)	ELF4 ELFR MEF																					Forward	Class I	aGDTsDQEGHSLEEk	1	N-Term(Dimethyl:2H(4)); S5(Phospho); K15(Dimethyl:2H(4))	84	ETD	27	0	1746.77	3	582.928	2.09	40.78	2832	OR5_101217_LM_HJ_Epac1_007_SCX_Phospho_F27.raw
TTSLGDpSLNAHSAAEK	1	T(1): 0.0; T(2): 0.0; S(3): 0.0; S(7): 100.0; S(12): 0.0	393	Q13796	Protein Shroom2 OS=Homo sapiens GN=SHROOM2 PE=1 SV=1 - [SHRM2_HUMAN]	1	Q13796	S851	Protein Shroom2 (Apical-like protein) (Protein APXL)	SHROOM2 APXL																					Forward	Class I	tTSLGDsLNAHSAAEk	1	N-Term(Dimethyl); S7(Phospho); K16(Dimethyl)	90	ETD	27	0	1737.81	3	579.941	1.52	66.18	4378	OR5_101221_LM_HJ_Epac1_007_SCX_Phospho_F27.raw
KGpSSGNASEVSVACLTER	1	S(3): 100.0; S(4): 0.0; S(8): 0.0; S(11): 0.0; T(16): 0.0	393	Q69YQ0	Cytospin-A OS=Homo sapiens GN=SPECC1L PE=1 SV=1 - [CYTSA_HUMAN]	1	Q69YQ0	S384	Cytospin-A (Renal carcinoma antigen NY-REN-22) (Sperm antigen with calponin homology and coiled-coil domains 1-like) (SPECC1-like protein)	SPECC1L CYTSA KIAA0376																					Reverse	Class I	kGsSGNASEVSVAcLTER	1	K1(Dimethyl); N-Term(Dimethyl); S3(Phospho); C14(Carbamidomethyl)	93	ETD	28	1	1987.92	3	663.31	-0.14	96.19	6535	20110105_LM_HJ_Epac_Rev_007_F28.raw
QDVDNApSLARLDLER	1	S(7): 100.0	393	P08670	Vimentin OS=Homo sapiens GN=VIM PE=1 SV=4 - [VIME_HUMAN]	1	P08670	S214	Vimentin	VIM																					Forward	Class I	qDVDNAsLARLDLER	1	N-Term(Dimethyl); S7(Phospho)	81	ETD	27	1	1822.87	3	608.295	0.75	116.51	7562	OR5_101221_LM_HJ_Epac1_007_SCX_Phospho_F27.raw
YGLIYHASLVGQTpSPK	1	Y(1): 0.0; Y(5): 0.0; S(8): 0.0; T(13): 0.0; S(14): 100.0	393	Q9Y2X3	Nucleolar protein 5 OS=Homo sapiens GN=NOL5 PE=1 SV=1 - [NOL5_HUMAN]	1	Q9Y2X3	S351	Nucleolar protein 58 (Nucleolar protein 5)	NOP58 NOL5 NOP5 HSPC120																					Forward	Class I	yGLIYHASLVGQTsPk	1	N-Term(Dimethyl); S14(Phospho); K16(Dimethyl)	102	ETD	28	0	1869.95	3	623.989	1.25	125.57	8918	OR5_101217_LM_HJ_Epac1_007_SCX_Phospho_F28.raw
QLpSTEQAVLQESLEK	1	S(3): 100.0; T(4): 0.0; S(12): 0.0	393	Q9ULD2	Mitochondrial tumor suppressor 1 OS=Homo sapiens GN=MTUS1 PE=1 SV=2 - [MTUS1_HUMAN]	1	Q9ULD2	S1203	Microtubule-associated tumor suppressor 1 (AT2 receptor-binding protein) (Angiotensin-II type 2 receptor-interacting protein) (Mitochondrial tumor suppressor 1)	MTUS1 ATBP ATIP GK1 KIAA1288 MTSG1																					Forward	Class I	qLsTEQAVLQESLEk	1	N-Term(Dimethyl); S3(Phospho); K15(Dimethyl)	77	ETD	13	0	1838.91	3	613.643	-0.27	137.65	9374	OR5_101216_LM_HJ_Epac1_007_SCX_Phospho_F13.raw
FFQGpSQEFLASASASAER	1	S(5): 100.0; S(11): 0.0; S(13): 0.0; S(15): 0.0	392	Q7Z2W4	Zinc finger CCCH-type antiviral protein 1 OS=Homo sapiens GN=ZC3HAV1 PE=1 SV=2 - [ZCCHV_HUMAN]	1	Q7Z2W4	S257	Zinc finger CCCH-type antiviral protein 1 (Zinc finger CCCH domain-containing protein 2) (Zinc finger antiviral protein) (ZAP)	ZC3HAV1 ZC3HDC2 PRO1677																					Forward	Class I	fFQGsQEFLASASASAER	1	N-Term(Dimethyl:2H(4)); S5(Phospho)	78	ETD	14	0	2044.93	3	682.315	0.14	145.13	12313	OR5_101215_LM_HJ_Epac1_007_SCX_Phospho_F14.raw
RDpSFIGTPYWMAPEVVMCETSK	1	S(3): 100.0; T(7): 0.0; Y(9): 0.0; T(20): 0.0; S(21): 0.0	392	Q9H2G2	STE20-like serine/threonine-protein kinase OS=Homo sapiens GN=SLK PE=1 SV=1 - [SLK_HUMAN]	1	Q9H2G2	S189	STE20-like serine/threonine-protein kinase (STE20-like kinase) (hSLK) (EC 2.7.11.1) (CTCL tumor antigen se20-9) (STE20-related serine/threonine-protein kinase) (STE20-related kinase) (Serine/threonine-protein kinase 2)	SLK KIAA0204 STK2																					Reverse	Class I	rDsFIGTPYWmAPEVVMcETSk	1	N-Term(Dimethyl); S3(Phospho); M11(Oxidation); C18(Carbamidomethyl); K22(Dimethyl)	53	HCD	27	1	2756.23	3	919.413	2.96	147.62	12707	20110114_LM_HJ_Epac_Rev_007_F27.raw
ERAMpSTTSISSPQPGK	1	S(5): 100.0; T(6): 0.0; T(7): 0.0; S(8): 0.0; S(10): 0.0; S(11): 0.0	392	Q9UJU6	Drebrin-like protein OS=Homo sapiens GN=DBNL PE=1 SV=1 - [DBNL_HUMAN]	1	Q9UJU6	S269	Drebrin-like protein (Cervical SH3P7) (Cervical mucin-associated protein) (Drebrin-F) (HPK1-interacting protein of 55 kDa) (HIP-55) (SH3 domain-containing protein 7)	DBNL CMAP SH3P7 PP5423																					Reverse	Class I	eRAmsTTSISSPQPGk	1	N-Term(Dimethyl:2H(4)); M4(Oxidation); S5(Phospho); K16(Dimethyl:2H(4))	98	ETD	28	1	1836.9	3	612.97	-2.86	42.39	3056	20110105_LM_HJ_Epac_Rev_007_F28_2.raw
KKGDDpSDEEDLCISNK	1	S(6): 100.0; S(14): 0.0	392	Q9Y3M8	StAR-related lipid transfer protein 13 OS=Homo sapiens GN=STARD13 PE=1 SV=2 - [STA13_HUMAN]	1	Q9Y3M8	S133	StAR-related lipid transfer protein 13 (46H23.2) (Deleted in liver cancer 2 protein) (DLC-2) (Rho GTPase-activating protein) (START domain-containing protein 13) (StARD13)	STARD13 DLC2 GT650																					Reverse	Class I	kkGDDsDEEDLcISNk	1	N-Term(Dimethyl); K1(Dimethyl); K2(Dimethyl); S6(Phospho); C12(Carbamidomethyl); K16(Dimethyl)	81	ETD	32	2	2044.91	3	682.31	-0.19	61.5	3774	20110105_LM_HJ_Epac_Rev_007_F32_2.raw
VLDTSSLTQpSAPApSPTNK	2	T(4): 0.0; S(5): 0.0; S(6): 0.0; T(8): 0.0; S(10): 100.0; S(14): 100.0; T(16): 0.0	392	Q8N122	Regulatory-associated protein of mTOR OS=Homo sapiens GN=RAPTOR PE=1 SV=1 - [RPTOR_HUMAN]	1	Q8N122	S859, S863	Regulatory-associated protein of mTOR (Raptor) (p150 target of rapamycin (TOR)-scaffold protein)	RPTOR KIAA1303 RAPTOR																					Forward	Class I	vLDTSSLTQsAPAsPTNk	1	N-Term(Dimethyl); S10(Phospho); S14(Phospho); K18(Dimethyl)	82	ETD	7	0	2032.92	3	678.313	0.37	64.89	4568	OR5_101215_LM_HJ_Epac1_007_SCX_Phospho_F7.raw
SSWLSTEGGRDSAQpSPK	1	S(1): 0.0; S(2): 0.0; S(5): 0.0; T(6): 0.0; S(12): 0.0; S(15): 100.0	392	Q9BXF6	Rab11 family-interacting protein 5 OS=Homo sapiens GN=RAB11FIP5 PE=1 SV=1 - [RFIP5_HUMAN]	1	Q9BXF6	S296	Rab11 family-interacting protein 5 (Rab11-FIP5) (Gamma-SNAP-associated factor 1) (Gaf-1) (Phosphoprotein pp75) (Rab11-interacting protein Rip11)	RAB11FIP5 GAF1 KIAA0857 RIP11																					Reverse	Class I	sSWLSTEGGRDSAQsPk	1	N-Term(Dimethyl:2H(4)); S15(Phospho); K17(Dimethyl:2H(4))	83	ETD	29	1	1936.91	3	646.309	-6.49	78.21	4776	20110105_LM_HJ_Epac_Rev_007_F29.raw
QEGHLDSEpSPTNIPLTK	1	S(7): 0.0; S(9): 100.0; T(11): 0.0; T(16): 0.0	392	Q9H7P9	Pleckstrin homology domain-containing family G member 2 OS=Homo sapiens GN=PLEKHG2 PE=1 SV=2 - [PKHG2_HUMAN]	1	Q9H7P9	S1049	Pleckstrin homology domain-containing family G member 2 (PH domain-containing family G member 2)	PLEKHG2																					Forward	Class I	qEGHLDSEsPTNIPLTk	1	N-Term(Dimethyl); S9(Phospho); K17(Dimethyl)	79	ETD	28	0	2001.96	3	667.99	1.23	91.17	6587	OR5_101217_LM_HJ_Epac1_007_SCX_Phospho_F28.raw
RSDpSASSEPVGIYQGFEK	1	S(2): 0.0; S(4): 100.0; S(6): 0.0; S(7): 0.0; Y(13): 0.0	392	Q05655	Protein kinase C delta type OS=Homo sapiens GN=PRKCD PE=1 SV=2 - [KPCD_HUMAN]	1	Q05655	S304	Protein kinase C delta type (EC 2.7.11.13) (Tyrosine-protein kinase PRKCD) (EC 2.7.10.2) (nPKC-delta)	PRKCD																					Forward	Class I	rSDsASSEPVGIYQGFEk	1	N-Term(Dimethyl:2H(4)); S4(Phospho); K18(Dimethyl:2H(4))	86	ETD	28	1	2101.01	3	701.008	0.65	117.72	8041	OR5_101221_LM_HJ_Epac1_007_SCX_Phospho_F28.raw
VLSPLRpSPPLIGSESAYESFLSADDK	1	S(3): 0.0; S(7): 100.0; S(13): 0.0; S(15): 0.0; Y(17): 0.0; S(19): 0.0; S(22): 0.0	392	P46821	Microtubule-associated protein 1B OS=Homo sapiens GN=MAP1B PE=1 SV=1 - [MAP1B_HUMAN]	1	P46821	S1400	Microtubule-associated protein 1B (MAP-1B) [Cleaved into: MAP1 light chain LC1]	MAP1B																					Forward	Class I	vLSPLRsPPLIGSESAYESFLSADDk	1	N-Term(Dimethyl); S7(Phospho); K26(Dimethyl)	76	HCD	27	1	2914.45	3	972.155	0.39	146.56	9595	OR5_101221_LM_HJ_Epac1_007_SCX_Phospho_F27.raw
IQQFDDGGpSDEEDIWEEK	1	S(9): 100.0	392	Q5H9R7	SAPS domain family member 3 OS=Homo sapiens GN=SAPS3 PE=1 SV=2 - [SAPS3_HUMAN]	1	Q5H9R7	S617	Serine/threonine-protein phosphatase 6 regulatory subunit 3 (SAPS domain family member 3) (Sporulation-induced transcript 4-associated protein SAPL)	PPP6R3 C11orf23 KIAA1558 PP6R3 SAPL SAPS3																					Forward	Class I	iQQFDDGGsDEEDIWEEk	1	N-Term(Dimethyl:2H(4)); S9(Phospho); K18(Dimethyl:2H(4))	84	HCD	13	0	2283.98	3	761.998	0.54	139.11	9817	OR5_101221_LM_HJ_Epac1_007_SCX_Phospho_F13.raw
ASpTFCGTPDYIAPEILQGLK	1	S(2): 0.4; T(3): 99.6; T(7): 0.0; Y(10): 0.0	391	Q05655	Protein kinase C delta type OS=Homo sapiens GN=PRKCD PE=1 SV=2 - [KPCD_HUMAN]	1	Q05655	T507	Protein kinase C delta type (EC 2.7.11.13) (Tyrosine-protein kinase PRKCD) (EC 2.7.10.2) (nPKC-delta)	PRKCD																					Reverse	Class I	aStFcGTPDYIAPEILQGLk	1	N-Term(Dimethyl); T3(Phospho); C5(Carbamidomethyl); K20(Dimethyl)	54	HCD	13	0	2317.12	3	773.045	0.28	150.25	10987	20110105_LM_HJ_Epac_Rev_007_F13.raw
EVDPSTGELQSLQMPESEGPSpSLDPSQEGPTGLK	1	S(5): 0.0; T(6): 0.0; S(11): 0.0; S(17): 0.0; S(21): 0.9; S(22): 99.1; S(26): 0.0; T(31): 0.0	391	Q13501	Sequestosome-1 OS=Homo sapiens GN=SQSTM1 PE=1 SV=1 - [SQSTM_HUMAN]	1	Q13501	S366	Sequestosome-1 (EBI3-associated protein of 60 kDa) (EBIAP) (p60) (Phosphotyrosine-independent ligand for the Lck SH2 domain of 62 kDa) (Ubiquitin-binding protein p62)	SQSTM1 ORCA OSIL																					Reverse	Class I	eVDPSTGELQSLQmPESEGPSsLDPSQEGPTGLk	1	N-Term(Dimethyl); M14(Oxidation); S22(Phospho); K34(Dimethyl)	76	HCD	13	0	3678.66	3	1226.89	-0.21	136.94	11028	20110114_LM_HJ_Epac_Rev_007_F13.raw
RPLpSSSHEASEGQAK	1	S(4): 100.0; S(5): 0.0; S(6): 0.0; S(10): 0.0	391	Q8IZ21	Phosphatase and actin regulator 4 OS=Homo sapiens GN=PHACTR4 PE=1 SV=1 - [PHAR4_HUMAN]	1	Q8IZ21	S176	Phosphatase and actin regulator 4	PHACTR4 PRO2963																					Reverse	Class I	rPLsSSHEASEGQAk	1	N-Term(Dimethyl); S4(Phospho); K15(Dimethyl)	101	ETD	32	0	1719.81	3	573.94	-0.55	25.21	1933	20110105_LM_HJ_Epac_Rev_007_F32.raw
IDASKNEEDEGHSNSpSPR	1	S(4): 0.0; S(13): 0.0; S(15): 0.0; S(16): 100.0	391	Q14103	Heterogeneous nuclear ribonucleoprotein D0 OS=Homo sapiens GN=HNRNPD PE=1 SV=1 - [HNRPD_HUMAN]	1	Q14103	S83	Heterogeneous nuclear ribonucleoprotein D0 (hnRNP D0) (AU-rich element RNA-binding protein 1)	HNRNPD AUF1 HNRPD																					Reverse	Class I	iDASkNEEDEGHSNSsPR	1	N-Term(Dimethyl); K5(Dimethyl); S16(Phospho)	82	ETD	32	1	2107.89	3	703.302	-0.24	26.06	1977	20110105_LM_HJ_Epac_Rev_007_F32.raw
RVTQGAApSPGHGIQEK	1	T(3): 0.0; S(8): 100.0	391	Q9HB58	Sp110 nuclear body protein OS=Homo sapiens GN=SP110 PE=1 SV=3 - [SP110_HUMAN]	1	Q9HB58	S380	Sp110 nuclear body protein (Interferon-induced protein 41/75) (Speckled 110 kDa) (Transcriptional coactivator Sp110)	SP110																					Forward	Class I	rVTQGAAsPGHGIQEk	1	N-Term(Dimethyl); S8(Phospho); K16(Dimethyl)	93	ETD	33	1	1771.89	3	591.3	0.66	39.15	2751	OR5_101217_LM_HJ_Epac1_007_SCX_Phospho_F33.raw
RPpSESDKEDELDK	1	S(3): 100.0; S(5): 0.0	391	Q02952	A-kinase anchor protein 12 OS=Homo sapiens GN=AKAP12 PE=1 SV=3 - [AKA12_HUMAN]	1	Q02952	S627	A-kinase anchor protein 12 (AKAP-12) (A-kinase anchor protein 250 kDa) (AKAP 250) (Gravin) (Myasthenia gravis autoantigen)	AKAP12 AKAP250																					Forward	Class I	rPsESDkEDELDk	1	N-Term(Dimethyl:2H(4)); S3(Phospho); K7(Dimethyl:2H(4)); K13(Dimethyl:2H(4))	97	ETD	32	1	1723.85	3	575.29	0.06	42.27	2882	OR5_101217_LM_HJ_Epac1_007_SCX_Phospho_F32.raw
HPASLTSSGSSGpSPSSSIK	1	S(4): 0.0; T(6): 0.0; S(7): 0.0; S(8): 0.0; S(10): 0.0; S(11): 0.0; S(13): 100.0; S(15): 0.0; S(16): 0.0; S(17): 0.0	391	Q9C0D5	Protein TANC1 OS=Homo sapiens GN=TANC1 PE=1 SV=2 - [TANC1_HUMAN]	1	Q9C0D5	S1668	Protein TANC1 (Tetratricopeptide repeat, ankyrin repeat and coiled-coil domain-containing protein 1)	TANC1 KIAA1728																					Reverse	Class I	hPASLTSSGSSGsPSSSIk	1	N-Term(Dimethyl:2H(4)); S13(Phospho); K19(Dimethyl:2H(4))	98	ETD	29	0	1917.94	3	639.984	-0.94	48.11	3444	20110105_LM_HJ_Epac_Rev_007_F29_2.raw
DSGRGDSVpSDSGSDALR	1	S(2): 0.0; S(7): 0.0; S(9): 100.0; S(11): 0.0; S(13): 0.0	391	Q53EL6	Programmed cell death protein 4 OS=Homo sapiens GN=PDCD4 PE=1 SV=1 - [PDCD4_HUMAN]	1	Q53EL6	S78	Programmed cell death protein 4 (Neoplastic transformation inhibitor protein) (Nuclear antigen H731-like) (Protein 197/15a)	PDCD4 H731																					Forward	Class I	dSGRGDSVsDSGSDALR	1	N-Term(Dimethyl); S9(Phospho)	97	ETD	27	1	1788.74	3	596.918	0.12	51.93	3470	OR5_101221_LM_HJ_Epac1_007_SCX_Phospho_F27.raw
IKIEHAPpSPSSGGTLK	1	S(8): 100.0; S(10): 0.0; S(11): 0.0; T(14): 0.0	391	Q14004	Cell division cycle 2-like protein kinase 5 OS=Homo sapiens GN=CDC2L5 PE=1 SV=2 - [CD2L5_HUMAN]	1	Q14004	S525	Cyclin-dependent kinase 13 (EC 2.7.11.22) (EC 2.7.11.23) (CDC2-related protein kinase 5) (Cell division cycle 2-like protein kinase 5) (Cell division protein kinase 13) (hCDK13) (Cholinesterase-related cell division controller)	CDK13 CDC2L CDC2L5 CHED KIAA1791																					Reverse	Class I	ikIEHAPsPSSGGTLk	1	N-Term(Dimethyl); K2(Dimethyl); S8(Phospho); K16(Dimethyl)	89	ETD	32	1	1785.95	3	595.989	1.39	65.38	4180	20110105_LM_HJ_Epac_Rev_007_F32.raw
ATDEDMQpSLApSLMSMK	2	T(2): 0.0; S(8): 100.0; S(11): 100.0; S(14): 0.0	391	Q8NDI1	EH domain-binding protein 1 OS=Homo sapiens GN=EHBP1 PE=1 SV=2 - [EHBP1_HUMAN]	1	Q8NDI1	S171, S174	EH domain-binding protein 1	EHBP1 KIAA0903 NACSIN																					Forward	Class I	aTDEDmQsLAsLmSmk	1	N-Term(Dimethyl); M6(Oxidation); S8(Phospho); S11(Phospho); M13(Oxidation); M15(Oxidation); K16(Dimethyl)	95	ETD	7	0	2021.75	3	674.59	-0.28	59.87	4241	OR5_101215_LM_HJ_Epac1_007_SCX_Phospho_F7.raw
NIIHGpSDSVESAEK	1	S(6): 100.0; S(8): 0.0; S(11): 0.0	391	P15531	Nucleoside diphosphate kinase A OS=Homo sapiens GN=NME1 PE=1 SV=1 - [NDKA_HUMAN]	1	P15531	S120	Nucleoside diphosphate kinase A (NDK A) (NDP kinase A) (EC 2.7.4.6) (Granzyme A-activated DNase) (GAAD) (Metastasis inhibition factor nm23) (Tumor metastatic process-associated protein) (nm23-H1)	NME1 NDPKA NM23																					Forward	Class I	nIIHGsDSVESAEk	1	N-Term(Dimethyl); S6(Phospho); K14(Dimethyl)	82	ETD	28	0	1621.75	3	541.254	0.68	62.88	4459	OR5_101221_LM_HJ_Epac1_007_SCX_Phospho_F28.raw
HVVLGAIENKVEpSK	1	S(13): 100.0	391	P41227	N-terminal acetyltransferase complex ARD1 subunit homolog A OS=Homo sapiens GN=ARD1A PE=1 SV=1 - [ARD1A_HUMAN]	1	P41227	S182	N-alpha-acetyltransferase 10 (EC 2.3.1.-) (EC 2.3.1.88) (N-terminal acetyltransferase complex ARD1 subunit homolog A) (NatA catalytic subunit)	NAA10 ARD1 ARD1A TE2																					Reverse	Class I	hVVLGAIENkVEsk	1	N-Term(Dimethyl); K10(Dimethyl); S13(Phospho); K14(Dimethyl)	84	ETD	32	1	1686.92	3	562.978	0.16	91.14	5260	20110105_LM_HJ_Epac_Rev_007_F32_2.raw
EGETQGVAFEHESPADFQNSQpSPVQDQDK	1	T(4): 0.0; S(13): 0.0; S(20): 0.4; S(22): 99.6	391	P78332	RNA-binding protein 6 OS=Homo sapiens GN=RBM6 PE=1 SV=5 - [RBM6_HUMAN]	1	P78332	S362	RNA-binding protein 6 (Lung cancer antigen NY-LU-12) (Protein G16) (RNA-binding motif protein 6) (RNA-binding protein DEF-3)	RBM6 DEF3																					Forward	Class I	eGETQGVAFEHESPADFQNSQsPVQDQDk	1	N-Term(Dimethyl); S22(Phospho); K29(Dimethyl)	83	HCD	27	0	3340.43	3	1114.15	-0.13	106.27	6910	OR5_101221_LM_HJ_Epac1_007_SCX_Phospho_F27.raw
QIpSDGEREELNLTANR	1	S(3): 100.0; T(13): 0.0	391	O95816	BAG family molecular chaperone regulator 2 OS=Homo sapiens GN=BAG2 PE=1 SV=1 - [BAG2_HUMAN]	1	O95816	S73	BAG family molecular chaperone regulator 2 (BAG-2) (Bcl-2-associated athanogene 2)	BAG2																					Forward	Class I	qIsDGEREELNLTANR	1	N-Term(Dimethyl); S3(Phospho)	113	ETD	28	1	1952.91	3	651.641	1.08	99.02	7132	OR5_101217_LM_HJ_Epac1_007_SCX_Phospho_F28.raw
QLEDGRTLpSDYNIQK	1	T(7): 0.0; S(9): 100.0; Y(11): 0.0	391	P62988	Ubiquitin OS=Homo sapiens GN=RPS27A PE=1 SV=1 - [UBIQ_HUMAN]	1	P62988	S57	Replaced by: P62987;P62979;P0CG47;P0CG48 = Ubiquitin-60S ribosomal protein L40 (CEP52) (Ubiquitin A-52 residue ribosomal protein fusion product 1) [Cleaved into: Ubiquitin; 60S ribosomal protein L40] | Ubiquitin-40S ribosomal protein S27a (Ubiquitin carboxyl extension protein 80) [Cleaved into: Ubiquitin; 40S ribosomal protein S27a] | Polyubiquitin-B [Cleaved into: Ubiquitin] | Polyubiquitin-C [C…	UBA52 UBCEP2 | RPS27A UBA80 UBCEP1 | UBB | UBC																					Forward	Class I	qLEDGRTLsDYNIQk	1	N-Term(Dimethyl); S9(Phospho); K15(Dimethyl)	65	ETD	28	1	1915.92	3	639.311	1.06	99.2	7143	OR5_101217_LM_HJ_Epac1_007_SCX_Phospho_F28.raw
EKPDpSDDDLDIASLVTAK	1	S(5): 100.0; S(13): 0.0; T(16): 0.0	391	Q86V48	Leucine zipper protein 1 OS=Homo sapiens GN=LUZP1 PE=1 SV=2 - [LUZP1_HUMAN]	1	Q86V48	S659	Leucine zipper protein 1	LUZP1																					Reverse	Class I	ekPDsDDDLDIASLVTAk	1	N-Term(Dimethyl:2H(4)); K2(Dimethyl:2H(4)); S5(Phospho); K18(Dimethyl:2H(4))	108	ETD	27	0	2108.06	3	703.357	-10.78	140.09	9097	20110105_LM_HJ_Epac_Rev_007_F27.raw
DQSpTPIIEVEGPLLSDTHVTFK	1	S(3): 0.5; T(4): 99.5; S(15): 0.0; T(17): 0.0; T(20): 0.0	390	P49116	Nuclear receptor subfamily 2 group C member 2 OS=Homo sapiens GN=NR2C2 PE=1 SV=1 - [NR2C2_HUMAN]	1	P49116	T352	Nuclear receptor subfamily 2 group C member 2 (Orphan nuclear receptor TAK1) (Orphan nuclear receptor TR4) (Testicular receptor 4)	NR2C2 TAK1 TR4																					Reverse	Class I	dQStPIIEVEGPLLSDTHVTFk	1	N-Term(Dimethyl:2H(4)); T4(Phospho); K22(Dimethyl:2H(4))	49	HCD	27	0	2570.32	3	857.446	0.05	153.67	12946	20110114_LM_HJ_Epac_Rev_007_F27_2.raw
AQLGINEDHpSEGDEKSEK	1	S(10): 100.0; S(16): 0.0	390	Q69YQ0	Cytospin-A OS=Homo sapiens GN=SPECC1L PE=1 SV=1 - [CYTSA_HUMAN]	1	Q69YQ0	S220	Cytospin-A (Renal carcinoma antigen NY-REN-22) (Sperm antigen with calponin homology and coiled-coil domains 1-like) (SPECC1-like protein)	SPECC1L CYTSA KIAA0376																					Reverse	Class I	aQLGINEDHsEGDEkSEk	1	N-Term(Dimethyl:2H(4)); S10(Phospho); K15(Dimethyl:2H(4)); K18(Dimethyl:2H(4))	89	ETD	31	1	2162.03	3	721.35	-2.79	46.53	2907	20110105_LM_HJ_Epac_Rev_007_F31.raw
SRLNATApSLEQER	1	S(1): 0.0; T(6): 0.0; S(8): 100.0	390	O76024	Wolframin OS=Homo sapiens GN=WFS1 PE=1 SV=1 - [WFS1_HUMAN]	1	O76024	S32	Wolframin	WFS1																					Forward	Class I	sRLNATAsLEQER	1	N-Term(Dimethyl:2H(4)); S8(Phospho)	98	ETD	30	1	1586.79	3	529.6	1.78	62.17	4372	OR5_101217_LM_HJ_Epac1_007_SCX_Phospho_F30.raw
QSNASpSDVEVEEKETSVSK	1	S(2): 0.0; S(5): 0.0; S(6): 100.0; T(15): 0.0; S(16): 0.0; S(18): 0.0	390	O75475	PC4 and SFRS1-interacting protein OS=Homo sapiens GN=PSIP1 PE=1 SV=1 - [PSIP1_HUMAN]	1	O75475	S106	PC4 and SFRS1-interacting protein (CLL-associated antigen KW-7) (Dense fine speckles 70 kDa protein) (DFS 70) (Lens epithelium-derived growth factor) (Transcriptional coactivator p75/p52)	PSIP1 DFS70 LEDGF PSIP2																					Forward	Class I	qSNASsDVEVEEkETSVSk	1	N-Term(Dimethyl); S6(Phospho); K13(Dimethyl); K19(Dimethyl)	109	ETD	27	1	2217.02	3	739.677	0.38	67.82	4485	OR5_101221_LM_HJ_Epac1_007_SCX_Phospho_F27.raw
AIKVEQATKPpSFESGR	1	T(8): 0.0; S(11): 100.0; S(14): 0.0	390	P38159	Heterogeneous nuclear ribonucleoprotein G OS=Homo sapiens GN=RBMX PE=1 SV=3 - [HNRPG_HUMAN]	1	P38159	S88	RNA-binding motif protein, X chromosome (Glycoprotein p43) (Heterogeneous nuclear ribonucleoprotein G) (hnRNP G) [Cleaved into: RNA-binding motif protein, X chromosome, N-terminally processed]	RBMX HNRPG RBMXP1																					Forward	Class I	aIkVEQATkPsFESGR	1	N-Term(Dimethyl); K3(Dimethyl); K9(Dimethyl); S11(Phospho)	76	ETD	31	1	1911.99	3	638.003	0.01	75.67	4790	OR5_101217_LM_HJ_Epac1_007_SCX_Phospho_F31.raw
GPTSTSIDNIDGpTPVRDER	1	T(3): 0.0; S(4): 0.0; T(5): 0.0; S(6): 0.0; T(13): 100.0	390	Q5VT52	Uncharacterized protein KIAA0460 OS=Homo sapiens GN=KIAA0460 PE=1 SV=1 - [K0460_HUMAN]	1	Q5VT52	T723	Regulation of nuclear pre-mRNA domain-containing protein 2	RPRD2 KIAA0460 HSPC099																					Forward	Class I	gPTSTSIDNIDGtPVRDER	1	N-Term(Dimethyl:2H(4)); T13(Phospho)	97	ETD	28	1	2142	3	714.672	-0.64	78.67	5513	OR5_101221_LM_HJ_Epac1_007_SCX_Phospho_F28.raw
SKFDpSDEEEEDTENVEAASSGK	1	S(1): 0.4; S(5): 99.6; T(12): 0.0; S(19): 0.0; S(20): 0.0	390	Q8TF01	Splicing factor, arginine/serine-rich 18 OS=Homo sapiens GN=SFRS18 PE=1 SV=2 - [SFR18_HUMAN]	1	Q8TF01	S290	Arginine/serine-rich protein PNISR (PNN-interacting serine/arginine-rich protein) (SR-related protein) (SR-rich protein) (Serine/arginine-rich-splicing regulatory protein 130) (SRrp130) (Splicing factor, arginine/serine-rich 130) (Splicing factor, arginine/serine-rich 18)	PNISR C6orf111 SFRS18 SRRP130 HSPC261 HSPC306																					Forward	Class I	skFDsDEEEEDTENVEAASSGk	1	N-Term(Dimethyl:2H(4)); K2(Dimethyl:2H(4)); S5(Phospho); K22(Dimethyl:2H(4))	67	HCD	27	1	2579.13	3	860.382	0.24	87.21	5807	OR5_101217_LM_HJ_Epac1_007_SCX_Phospho_F27.raw
RFpSEGVLQSPSQDQEK	1	S(3): 100.0; S(9): 0.0; S(11): 0.0	390	Q9C0C2	182 kDa tankyrase 1-binding protein OS=Homo sapiens GN=TNKS1BP1 PE=1 SV=3 - [TB182_HUMAN]	1	Q9C0C2	S429	182 kDa tankyrase-1-binding protein	TNKS1BP1 KIAA1741 TAB182																					Reverse	Class I	rFsEGVLQSPSQDQEk	1	N-Term(Dimethyl); S3(Phospho); K16(Dimethyl)	67	HCD	28	1	1970.92	2	985.963	-1.83	91.5	6235	20110105_LM_HJ_Epac_Rev_007_F28_2.raw
SEpSLIDASEDpSQLEAAIR	2	S(1): 0.0; S(3): 100.0; S(8): 0.0; S(11): 100.0	390	O94888	UBX domain-containing protein 7 OS=Homo sapiens GN=UBXD7 PE=1 SV=2 - [UBXD7_HUMAN]	1	O94888	S280, S288	UBX domain-containing protein 7	UBXN7 KIAA0794 UBXD7																					Reverse	Class I	sEsLIDASEDsQLEAAIR	1	N-Term(Dimethyl); S3(Phospho); S11(Phospho)	101	ETD	6	0	2121.9	3	707.973	2.01	88	6346	20110105_LM_HJ_Epac_Rev_007_F6.raw
GYYSPYSVSGSGpSTAGSR	1	Y(2): 0.0; Y(3): 0.0; S(4): 0.0; Y(6): 0.0; S(7): 0.0; S(9): 0.0; S(11): 0.4; S(13): 99.2; T(14): 0.4; S(17): 0.0	390	Q15149	Plectin-1 OS=Homo sapiens GN=PLEC1 PE=1 SV=2 - [PLEC1_HUMAN]	1	Q15149	S4622	Plectin (PCN) (PLTN) (Hemidesmosomal protein 1) (HD1) (Plectin-1)	PLEC PLEC1																					Reverse	Class I	gYYSPYSVSGSGsTAGSR	1	N-Term(Dimethyl:2H(4)); S13(Phospho)	92	HCD	14	0	1894.83	2	947.917	5.93	100.15	8258	20110114_LM_HJ_Epac_Rev_007_F14.raw
SLLSHEFQDEpTDTEEETLYSSKH	1	S(1): 0.0; S(4): 0.0; T(11): 100.0; T(13): 0.0; T(17): 0.0; Y(19): 0.0; S(20): 0.0; S(21): 0.0	390	O75976	Carboxypeptidase D OS=Homo sapiens GN=CPD PE=1 SV=2 - [CBPD_HUMAN]	1	O75976	T1368	Carboxypeptidase D (EC 3.4.17.22) (Metallocarboxypeptidase D) (gp180)	CPD																					Forward	Class I	sLLSHEFQDEtDTEEETLYSSkH	1	N-Term(Dimethyl); T11(Phospho); K22(Dimethyl)	70	HCD	30	1	2861.27	3	954.428	10.15	127.87	8691	OR5_101217_LM_HJ_Epac1_007_SCX_Phospho_F30.raw
LSpSTDDGYIDLQFK	1	S(2): 0.0; S(3): 100.0; T(4): 0.0; Y(8): 0.0	389	Q96A57	UPF0414 transmembrane protein C20orf30 OS=Homo sapiens GN=C20orf30 PE=2 SV=1 - [CT030_HUMAN]	1	Q96A57	S24	Transmembrane protein 230	TMEM230 C20orf30 HSPC274 UNQ2432/PRO4992																					Reverse	Class I	lSsTDDGYIDLQFk	1	N-Term(Dimethyl); S3(Phospho); K14(Dimethyl)	101	ETD	13	0	1737.8	3	579.938	0.3	141.66	10355	20110105_LM_HJ_Epac_Rev_007_F13.raw
TLAGMGLQPGNIpSPTSK	1	T(1): 0.0; S(13): 100.0; T(15): 0.0; S(16): 0.0	389	P24723	Protein kinase C eta type OS=Homo sapiens GN=PRKCH PE=1 SV=3 - [KPCL_HUMAN]	1	P24723	S317	Protein kinase C eta type (EC 2.7.11.13) (PKC-L) (nPKC-eta)	PRKCH PKCL PRKCL																					Forward	Class I	tLAGMGLQPGNIsPTSk	1	N-Term(Dimethyl); S13(Phospho); K17(Dimethyl)	86	ETD	14	0	1807.9	3	603.306	0.4	121.75	10448	OR5_101215_LM_HJ_Epac1_007_SCX_Phospho_F14.raw
RRpSQSIEQESQEK	1	S(3): 100.0; S(5): 0.0; S(10): 0.0	389	Q5VTL8	Pre-mRNA-splicing factor 38B OS=Homo sapiens GN=PRPF38B PE=1 SV=1 - [PR38B_HUMAN]	1	Q5VTL8	S527	Pre-mRNA-splicing factor 38B (Sarcoma antigen NY-SAR-27)	PRPF38B																					Forward	Class I	rRsQSIEQESQEk	1	N-Term(Dimethyl); S3(Phospho); K13(Dimethyl)	78	ETD	35	2	1740.83	3	580.948	1.22	32.77	2395	OR5_101217_LM_HJ_Epac1_007_SCX_Phospho_F35.raw
KWDGpSEEDEDNSKK	1	S(5): 100.0; S(12): 0.0	389	O60841	Eukaryotic translation initiation factor 5B OS=Homo sapiens GN=EIF5B PE=1 SV=3 - [IF2P_HUMAN]	1	O60841	S164	Eukaryotic translation initiation factor 5B (eIF-5B) (Translation initiation factor IF-2)	EIF5B IF2 KIAA0741																					Reverse	Class I	kWDGsEEDEDNSkk	1	K1(Dimethyl); N-Term(Dimethyl); S5(Phospho); K13(Dimethyl); K14(Dimethyl)	71	ETD	32	2	1858.81	3	620.274	-1.58	34.81	2461	20110105_LM_HJ_Epac_Rev_007_F32.raw
EYVSNDAAQpSDDEEK	1	Y(2): 0.0; S(4): 0.0; S(10): 100.0	389	Q5JSH3	WD repeat-containing protein 44 OS=Homo sapiens GN=WDR44 PE=1 SV=1 - [WDR44_HUMAN]	1	Q5JSH3	S403	WD repeat-containing protein 44 (Rabphilin-11)	WDR44																					Forward	Class I	eYVSNDAAQsDDEEk	1	N-Term(Dimethyl:2H(4)); S10(Phospho); K15(Dimethyl:2H(4))	107	ETD	14	0	1843.77	3	615.262	-0.15	48.69	3992	OR5_101215_LM_HJ_Epac1_007_SCX_Phospho_F14.raw
NGGLEHVPSSSpSIHNGDMEK	1	S(9): 0.0; S(10): 0.0; S(11): 3.7; S(12): 96.3	389	O60238	BCL2/adenovirus E1B 19 kDa protein-interacting protein 3-like OS=Homo sapiens GN=BNIP3L PE=1 SV=1 - [BNI3L_HUMAN]	1	O60238	S65	BCL2/adenovirus E1B 19 kDa protein-interacting protein 3-like (Adenovirus E1B19K-binding protein B5) (BCL2/adenovirus E1B 19 kDa protein-interacting protein 3A) (NIP3-like protein X) (NIP3L)	BNIP3L BNIP3A BNIP3H NIX																					Forward	Class I	nGGLEHVPSSSsIHNGDMEk	1	N-Term(Dimethyl:2H(4)); S12(Phospho); K20(Dimethyl:2H(4))	89	ETD	31	0	2239.03	3	747.016	1.71	70.83	4511	OR5_101221_LM_HJ_Epac1_007_SCX_Phospho_F31.raw
QRDKpSPSSLLEDAK	1	S(5): 100.0; S(7): 0.0; S(8): 0.0	389	P42684	Tyrosine-protein kinase ABL2 OS=Homo sapiens GN=ABL2 PE=1 SV=1 - [ABL2_HUMAN]	1	P42684	S631	Abelson tyrosine-protein kinase 2 (EC 2.7.10.2) (Abelson murine leukemia viral oncogene homolog 2) (Abelson-related gene protein) (Tyrosine-protein kinase ARG)	ABL2 ABLL ARG																					Forward	Class I	qRDksPSSLLEDAk	2	N-Term(Dimethyl); K4(Dimethyl); S5(Phospho); K14(Dimethyl)	61	ETD	33	2	1737.88	3	579.965	1.58	89.53	5503	OR5_101217_LM_HJ_Epac1_007_SCX_Phospho_F33.raw
KEpTEpSEAEDNLDDLEK	2	T(3): 100.0; S(5): 100.0	389	Q8IYB3	Serine/arginine repetitive matrix protein 1 OS=Homo sapiens GN=SRRM1 PE=1 SV=2 - [SRRM1_HUMAN]	1	Q8IYB3	T872, S874	Serine/arginine repetitive matrix protein 1 (SR-related nuclear matrix protein of 160 kDa) (SRm160) (Ser/Arg-related nuclear matrix protein)	SRRM1 SRM160																					Forward	Class I	kEtEsEAEDNLDDLEk	1	N-Term(Dimethyl:2H(4)); K1(Dimethyl:2H(4)); T3(Phospho); S5(Phospho); K16(Dimethyl:2H(4))	71	ETD	14	1	2120.93	3	707.649	0.73	110.64	8126	OR5_101221_LM_HJ_Epac1_007_SCX_Phospho_F14.raw
ETNLDSLPLVDpTHSK	1	T(2): 0.0; S(6): 0.0; T(12): 100.0; S(14): 0.0	389	P08670	Vimentin OS=Homo sapiens GN=VIM PE=1 SV=4 - [VIME_HUMAN]	1	P08670	T436	Vimentin	VIM																					Forward	Class I	eTNLDSLPLVDtHSk	1	N-Term(Dimethyl:2H(4)); T12(Phospho); K15(Dimethyl:2H(4))	80	ETD	27	0	1812.92	3	604.98	0.65	125.68	8256	OR5_101217_LM_HJ_Epac1_007_SCX_Phospho_F27.raw
pSVSENSLVAMDFSGQTGR	1	S(1): 99.9; S(3): 0.1; S(6): 0.0; S(13): 0.0; T(16): 0.0	389	Q13322	Growth factor receptor-bound protein 10 OS=Homo sapiens GN=GRB10 PE=1 SV=2 - [GRB10_HUMAN]	1	Q13322	S426	Growth factor receptor-bound protein 10 (GRB10 adapter protein) (Insulin receptor-binding protein Grb-IR)	GRB10 GRBIR KIAA0207																					Forward	Class I	sVSENSLVAmDFSGQTGR	1	N-Term(Dimethyl:2H(4)); S1(Phospho); M10(Oxidation)	110	ETD	13	0	2012.89	3	671.635	-0.71	125.62	8560	OR5_101216_LM_HJ_Epac1_007_SCX_Phospho_F13.raw
ALSSLHGDDQDpSEDEVLTIPEVK	1	S(3): 0.0; S(4): 0.0; S(12): 100.0; T(18): 0.0	389	P11717	Cation-independent mannose-6-phosphate receptor OS=Homo sapiens GN=IGF2R PE=1 SV=2 - [MPRI_HUMAN]	1	P11717	S2409	Cation-independent mannose-6-phosphate receptor (CI Man-6-P receptor) (CI-MPR) (M6PR) (300 kDa mannose 6-phosphate receptor) (MPR 300) (Insulin-like growth factor 2 receptor) (Insulin-like growth factor II receptor) (IGF-II receptor) (M6P/IGF2 receptor) (M6P/IGF2R) (CD antigen CD222)	IGF2R MPRI																					Forward	Class I	aLSSLHGDDQDsEDEVLTIPEVk	1	N-Term(Dimethyl); S12(Phospho); K23(Dimethyl)	81	HCD	27	0	2633.23	2	1317.12	0.97	137.57	8964	OR5_101221_LM_HJ_Epac1_007_SCX_Phospho_F27.raw
KNpSLISSLEEEVSILNR	1	S(3): 100.0; S(6): 0.0; S(7): 0.0; S(13): 0.0	389	Q14980	Nuclear mitotic apparatus protein 1 OS=Homo sapiens GN=NUMA1 PE=1 SV=2 - [NUMA1_HUMAN]	1	Q14980	S1225	Nuclear mitotic apparatus protein 1 (NuMA protein) (SP-H antigen)	NUMA1 NUMA																					Reverse	Class I	kNsLISSLEEEVSILNR	1	N-Term(Dimethyl:2H(4)); K1(Dimethyl:2H(4)); S3(Phospho)	72	ETD	28	1	2075.12	3	692.38	0.53	153.28	9935	20110105_LM_HJ_Epac_Rev_007_F28_2.raw
METVSNASSSSNPSpSPGR	1	T(3): 0.0; S(5): 0.0; S(8): 0.0; S(9): 0.0; S(10): 0.0; S(11): 0.0; S(14): 0.0; S(15): 100.0	388	Q9NTI5	Sister chromatid cohesion protein PDS5 homolog B OS=Homo sapiens GN=PDS5B PE=1 SV=1 - [PDS5B_HUMAN]	1	Q9NTI5	S1166	Sister chromatid cohesion protein PDS5 homolog B (Androgen-induced proliferation inhibitor) (Androgen-induced prostate proliferative shutoff-associated protein AS3)	PDS5B APRIN AS3 KIAA0979																					Forward	Class I	mETVSNASSSSNPSsPGR	1	N-Term(Dimethyl); M1(Oxidation); S15(Phospho)	77	ETD	14	0	1918.79	3	640.268	1.9	33.1	2419	OR5_101221_LM_HJ_Epac1_007_SCX_Phospho_F14.raw
ITVKKETQpSPEQVK	1	T(2): 0.0; T(7): 0.0; S(9): 100.0	388	Q9NYF8	Bcl-2-associated transcription factor 1 OS=Homo sapiens GN=BCLAF1 PE=1 SV=2 - [BCLF1_HUMAN]	1	Q9NYF8	S496	Bcl-2-associated transcription factor 1 (Btf)	BCLAF1 BTF KIAA0164																					Reverse	Class I	iTVkkETQsPEQVk	1	N-Term(Dimethyl); K4(Dimethyl); K5(Dimethyl); S9(Phospho); K14(Dimethyl)	60	ETD	31	2	1806.99	3	603.002	-2.84	38.69	2480	20110105_LM_HJ_Epac_Rev_007_F31.raw
VQEKPDpSPGGSTQIQR	1	S(7): 100.0; S(11): 0.0; T(12): 0.0	388	Q13459	Myosin-IXb OS=Homo sapiens GN=MYO9B PE=1 SV=2 - [MYO9B_HUMAN]	1	Q13459	S1290	Unconventional myosin-IXb (Unconventional myosin-9b)	MYO9B MYR5																					Forward	Class I	vQEkPDsPGGSTQIQR	1	N-Term(Dimethyl); K4(Dimethyl); S7(Phospho)	80	ETD	28	0	1862.9	3	621.639	0.22	42.18	3074	OR5_101217_LM_HJ_Epac1_007_SCX_Phospho_F28.raw
RGLLYDpSDEEDEERPAR	1	Y(5): 0.0; S(7): 100.0	388	P49736	DNA replication licensing factor MCM2 OS=Homo sapiens GN=MCM2 PE=1 SV=4 - [MCM2_HUMAN]	1	P49736	S139	DNA replication licensing factor MCM2 (EC 3.6.4.12) (Minichromosome maintenance protein 2 homolog) (Nuclear protein BM28)	MCM2 BM28 CCNL1 CDCL1 KIAA0030																					Forward	Class I	rGLLYDsDEEDEERPAR	1	N-Term(Dimethyl); S7(Phospho)	67	ETD	32	1	2157.97	3	719.995	12.5	82.71	4877	OR5_101221_LM_HJ_Epac1_007_SCX_Phospho_F32.raw
RVpSLHCLLDQFDK	1	S(3): 100.0	388	Q8IWF6	Protein FAM116A OS=Homo sapiens GN=FAM116A PE=2 SV=1 - [F116A_HUMAN]	1	Q8IWF6	S127	Protein FAM116A	FAM116A																					Reverse	Class I	rVsLHcLLDQFDk	1	N-Term(Dimethyl); S3(Phospho); C6(Carbamidomethyl); K13(Dimethyl)	81	ETD	32	1	1766.87	3	589.628	1.22	141.9	7759	20110105_LM_HJ_Epac_Rev_007_F32_2.raw
KRIDpSVYLDPLVFR	1	S(5): 100.0; Y(7): 0.0	388	O60443	Non-syndromic hearing impairment protein 5 OS=Homo sapiens GN=DFNA5 PE=2 SV=2 - [DFNA5_HUMAN]	1	O60443	S252	Non-syndromic hearing impairment protein 5 (Inversely correlated with estrogen receptor expression 1) (ICERE-1)	DFNA5 ICERE1																					Reverse	Class I	kRIDsVYLDPLVFR	1	N-Term(Dimethyl); K1(Dimethyl); S5(Phospho)	80	ETD	33	2	1857	3	619.673	-0.21	141.04	8195	20110105_LM_HJ_Epac_Rev_007_F33.raw
pSYELPDGQVITIGNER	1	S(1): 100.0; Y(2): 0.0; T(11): 0.0	388	P60709;P68032;Q6S8J3;Q562R1;A5A3E0;Q9BYX7	Actin, cytoplasmic 1 OS=Homo sapiens GN=ACTB PE=1 SV=1 - [ACTB_HUMAN]|Actin, alpha cardiac muscle 1 OS=Homo sapiens GN=ACTC1 PE=1 SV=1 - [ACTC_HUMAN]|ANKRD26-like family C member 1A OS=Homo sapiens GN=A26C1A PE=1 SV=3 - [A26CA_HUMAN]|Beta-actin-like protein 2 OS=Homo sapiens GN=ACTBL2 PE=1 SV=2 - [ACTBL_HUMAN]|ANKRD26-like family C member 1B OS=Homo sapiens GN=A26C1B PE=1 SV=1 - [A26CB_HUMAN]|Kap…	6	P60709	S239	Actin, cytoplasmic 1 (Beta-actin) [Cleaved into: Actin, cytoplasmic 1, N-terminally processed]	ACTB	P68032		Actin, alpha cardiac muscle 1 (Alpha-cardiac actin)	ACTC1 ACTC	Q6S8J3	S939	POTE ankyrin domain family member E (ANKRD26-like family C member 1A) (Prostate, ovary, testis-expressed protein on chromosome 2) (POTE-2)	POTEE A26C1A POTE2	Q562R1	S240	Beta-actin-like protein 2 (Kappa-actin)	ACTBL2	A5A3E0	S939	POTE ankyrin domain family member F (ANKRD26-like family C member 1B) (Chimeric POTE-actin protein)	POTEF A26C1B	Q9BYX7	S239	Putative beta-actin-like protein 3 (Kappa-actin) (POTE ankyrin domain family member K)	POTEKP ACTBL3 FKSG30	Forward	Class I	sYELPDGQVITIGNER	1	N-Term(Dimethyl); S1(Phospho)	88	ETD	13	0	1898.89	3	633.635	1.12	144.14	9853	OR5_101216_LM_HJ_Epac1_007_SCX_Phospho_F13.raw
ANpSTSDSVFTETPSPVLK	1	S(3): 100.0; T(4): 0.0; S(5): 0.0; S(7): 0.0; T(10): 0.0; T(12): 0.0; S(14): 0.0	387	Q9UKI2	Cdc42 effector protein 3 OS=Homo sapiens GN=CDC42EP3 PE=1 SV=1 - [BORG2_HUMAN]	1	Q9UKI2	S89	Cdc42 effector protein 3 (Binder of Rho GTPases 2) (MSE55-related Cdc42-binding protein)	CDC42EP3 BORG2 CEP3																					Reverse	Class I	aNsTSDSVFTETPSPVLk	1	N-Term(Dimethyl:2H(4)); S3(Phospho); K18(Dimethyl:2H(4))	89	HCD	13	0	2024.01	2	1012.51	0.8	138.12	11133	20110114_LM_HJ_Epac_Rev_007_F13.raw
NRDASTLQpSQKAEGTGDAK	1	S(5): 0.0; T(6): 0.0; S(9): 100.0; T(15): 0.0	387	O00479	High mobility group nucleosome-binding domain-containing protein 4 OS=Homo sapiens GN=HMGN4 PE=1 SV=3 - [HMGN4_HUMAN]	1	O00479	S80	High mobility group nucleosome-binding domain-containing protein 4 (Non-histone chromosomal protein HMG-17-like 3) (Non-histone chromosomal protein)	HMGN4 HMG17L3 NHC																					Reverse	Class I	nRDASTLQsQkAEGTGDAk	1	N-Term(Dimethyl); S9(Phospho); K11(Dimethyl); K19(Dimethyl)	92	ETD	32	2	2141.02	3	714.345	-1.73	29.03	2134	20110105_LM_HJ_Epac_Rev_007_F32.raw
QGGVQPQAGDGAQpTPKEEK	1	T(14): 100.0	387	Q9BRZ2	Tripartite motif-containing protein 56 OS=Homo sapiens GN=TRIM56 PE=1 SV=3 - [TRI56_HUMAN]	1	Q9BRZ2	T418	E3 ubiquitin-protein ligase TRIM56 (EC 6.3.2.-) (RING finger protein 109) (Tripartite motif-containing protein 56)	TRIM56 RNF109																					Forward	Class I	qGGVQPQAGDGAQtPkEEk	1	N-Term(Dimethyl); T14(Phospho); K16(Dimethyl); K19(Dimethyl)	89	ETD	27	1	2088.99	3	697.003	-0.61	35.34	2472	OR5_101221_LM_HJ_Epac1_007_SCX_Phospho_F27.raw
RSRpSGEGEVSGLMR	1	S(2): 0.0; S(4): 100.0; S(10): 0.0	387	Q13263	Transcription intermediary factor 1-beta OS=Homo sapiens GN=TRIM28 PE=1 SV=5 - [TIF1B_HUMAN]	1	Q13263	S473	Transcription intermediary factor 1-beta (TIF1-beta) (E3 SUMO-protein ligase TRIM28) (EC 6.3.2.-) (KRAB-associated protein 1) (KAP-1) (KRAB-interacting protein 1) (KRIP-1) (Nuclear corepressor KAP-1) (RING finger protein 96) (Tripartite motif-containing protein 28)	TRIM28 KAP1 RNF96 TIF1B																					Forward	Class I	rSRsGEGEVSGLmR	1	N-Term(Dimethyl); S4(Phospho); M13(Oxidation)	101	ETD	35	2	1644.75	3	548.923	0.84	48.39	3243	OR5_101217_LM_HJ_Epac1_007_SCX_Phospho_F35.raw
RKpSVPSETVVEDSR	1	S(3): 100.0; S(6): 0.0; T(8): 0.0; S(13): 0.0	387	P11137	Microtubule-associated protein 2 OS=Homo sapiens GN=MAP2 PE=1 SV=3 - [MAP2_HUMAN]	1	P11137	S833	Microtubule-associated protein 2 (MAP-2)	MAP2																					Forward	Class I	rksVPSETVVEDSR	1	N-Term(Dimethyl:2H(4)); K2(Dimethyl:2H(4)); S3(Phospho)	94	ETD	33	2	1732.91	3	578.308	0.62	49.49	3329	OR5_101221_LM_HJ_Epac1_007_SCX_Phospho_F33.raw
DYDEEEQGYDpSEK	1	Y(2): 0.0; Y(9): 0.0; S(11): 100.0	387	Q05519	Splicing factor arginine/serine-rich 11 OS=Homo sapiens GN=SFRS11 PE=1 SV=1 - [SFR11_HUMAN]	1	Q05519	S434	Serine/arginine-rich splicing factor 11 (Arginine-rich 54 kDa nuclear protein) (p54) (Splicing factor, arginine/serine-rich 11)	SRSF11 SFRS11																					Reverse	Class I	dYDEEEQGYDsEk	1	N-Term(Dimethyl:2H(4)); S11(Phospho); K13(Dimethyl:2H(4))	74	ETD	13	0	1750.68	3	584.233	1.18	59.42	4285	20110105_LM_HJ_Epac_Rev_007_F13.raw
DSYpSSSRSDLYSSGR	1	S(2): 0.0; Y(3): 0.0; S(4): 100.0; S(5): 0.0; S(6): 0.0; S(8): 0.0; Y(11): 0.0; S(12): 0.0; S(13): 0.0	387	P38159	Heterogeneous nuclear ribonucleoprotein G OS=Homo sapiens GN=RBMX PE=1 SV=3 - [HNRPG_HUMAN]	1	P38159	S328	RNA-binding motif protein, X chromosome (Glycoprotein p43) (Heterogeneous nuclear ribonucleoprotein G) (hnRNP G) [Cleaved into: RNA-binding motif protein, X chromosome, N-terminally processed]	RBMX HNRPG RBMXP1																					Reverse	Class I	dSYsSSRSDLYSSGR	1	N-Term(Dimethyl); S4(Phospho)	91	ETD	27	1	1774.73	3	592.247	-0.55	63.42	4334	20110105_LM_HJ_Epac_Rev_007_F27_2.raw
IRpTQSFSLQER	1	T(3): 100.0; S(5): 0.0; S(7): 0.0	387	P29474	Nitric oxide synthase, endothelial OS=Homo sapiens GN=NOS3 PE=1 SV=3 - [NOS3_HUMAN]	1	P29474	T1175	Nitric oxide synthase, endothelial (EC 1.14.13.39) (Constitutive NOS) (cNOS) (EC-NOS) (Endothelial NOS) (eNOS) (NOS type III) (NOSIII)	NOS3																					Reverse	Class I	iRtQSFSLQER	1	N-Term(Dimethyl); T3(Phospho)	57	ETD	29	1	1472.72	3	491.577	-5.97	78.18	4775	20110105_LM_HJ_Epac_Rev_007_F29.raw
QASLEQANpSFPRK	1	S(3): 0.0; S(9): 100.0	387	Q8N699	Myc target protein 1 OS=Homo sapiens GN=MYCT1 PE=2 SV=1 - [MYCT1_HUMAN]	1	Q8N699	S155	Myc target protein 1 (Myc target in myeloid cells protein 1)	MYCT1 MTLC MTMC1																					Forward	Class I	qASLEQANsFPRk	1	N-Term(Dimethyl:2H(4)); S9(Phospho); K13(Dimethyl:2H(4))	81	ETD	28	1	1619.84	3	540.617	-2.22	69.42	4903	OR5_101221_LM_HJ_Epac1_007_SCX_Phospho_F28.raw
TSTDRHSLpSLDDIR	1	T(1): 0.0; S(2): 0.0; T(3): 0.0; S(7): 0.0; S(9): 100.0	387	Q96NE9	FERM domain-containing protein 6 OS=Homo sapiens GN=FRMD6 PE=2 SV=1 - [FRMD6_HUMAN]	1	Q96NE9	S544	FERM domain-containing protein 6 (Willin)	FRMD6 C14orf31																					Forward	Class I	tSTDRHSLsLDDIR	1	N-Term(Dimethyl); S9(Phospho)	91	ETD	33	1	1723.8	3	575.272	0.77	88.58	5338	OR5_101221_LM_HJ_Epac1_007_SCX_Phospho_F33.raw
FSELEHLDRLpSGR	1	S(2): 0.0; S(11): 100.0	387	P37173	TGF-beta receptor type-2 OS=Homo sapiens GN=TGFBR2 PE=1 SV=2 - [TGFR2_HUMAN]	1	P37173	S548	TGF-beta receptor type-2 (TGFR-2) (EC 2.7.11.30) (TGF-beta type II receptor) (Transforming growth factor-beta receptor type II) (TGF-beta receptor type II) (TbetaR-II)	TGFBR2																					Forward	Class I	fSELEHLDRLsGR	1	N-Term(Dimethyl); S11(Phospho)	70	ETD	33	1	1666.8	3	556.27	0.34	107.11	6268	OR5_101221_LM_HJ_Epac1_007_SCX_Phospho_F33.raw
RSpSGFISELPSEEGK	1	S(2): 0.0; S(3): 100.0; S(7): 0.0; S(11): 0.0	387	Q5VZK9	Leucine-rich repeat-containing protein 16A OS=Homo sapiens GN=LRRC16A PE=1 SV=1 - [LR16A_HUMAN]	1	Q5VZK9	S968	Leucine-rich repeat-containing protein 16A (CARMIL homolog)	LRRC16A CARMIL LRRC16																					Forward	Class I	rSsGFISELPSEEGk	1	N-Term(Dimethyl); S3(Phospho); K15(Dimethyl)	74	ETD	28	1	1758.83	3	586.949	0.85	112.19	7686	OR5_101221_LM_HJ_Epac1_007_SCX_Phospho_F28.raw
SApSSSWLEGTSTQAK	1	S(1): 0.1; S(3): 99.9; S(4): 0.0; S(5): 0.0; T(10): 0.0; S(11): 0.0; T(12): 0.0	387	Q9BZL4	Protein phosphatase 1 regulatory subunit 12C OS=Homo sapiens GN=PPP1R12C PE=1 SV=1 - [PP12C_HUMAN]	1	Q9BZL4	S452	Protein phosphatase 1 regulatory subunit 12C (Protein phosphatase 1 myosin-binding subunit of 85 kDa) (Protein phosphatase 1 myosin-binding subunit p85)	PPP1R12C LENG3 MBS85																					Forward	Class I	sAsSSWLEGTSTQAk	1	N-Term(Dimethyl:2H(4)); S3(Phospho); K15(Dimethyl:2H(4))	93	ETD	13	0	1683.81	3	561.941	0.7	108.75	7718	OR5_101221_LM_HJ_Epac1_007_SCX_Phospho_F13.raw
EDRGEYpSPGTALPSLR	1	Y(6): 0.0; S(7): 100.0; T(10): 0.0; S(14): 0.0	387	Q9BT81	Transcription factor SOX-7 OS=Homo sapiens GN=SOX7 PE=2 SV=1 - [SOX7_HUMAN]	1	Q9BT81	S166	Transcription factor SOX-7	SOX7																					Forward	Class I	eDRGEYsPGTALPSLR	1	N-Term(Dimethyl); S7(Phospho)	99	ETD	28	1	1855.86	3	619.292	1.98	114.08	8157	OR5_101217_LM_HJ_Epac1_007_SCX_Phospho_F28.raw
pSKSEASLLQLLAGAGTHGTPSAPSR	1	S(1): 98.8; S(3): 0.6; S(6): 0.6; T(16): 0.0; T(19): 0.0; S(21): 0.0; S(24): 0.0	387	O94827	Pleckstrin homology domain-containing family G member 5 OS=Homo sapiens GN=PLEKHG5 PE=2 SV=3 - [PKHG5_HUMAN]	1	O94827	S932	Pleckstrin homology domain-containing family G member 5 (PH domain-containing family G member 5) (Guanine nucleotide exchange factor 720) (GEF720)	PLEKHG5 KIAA0720																					Reverse	Class I	skSEASLLQLLAGAGTHGTPSAPSR	3	N-Term(Dimethyl:2H(4)); S1(Phospho); K2(Dimethyl:2H(4))	79	HCD	30	1	2580.36	3	860.792	-1.26	143.01	9271	20110105_LM_HJ_Epac_Rev_007_F30_2.raw
EIESEIDpSEEELINK	1	S(4): 0.0; S(8): 100.0	386	Q14566	DNA replication licensing factor MCM6 OS=Homo sapiens GN=MCM6 PE=1 SV=1 - [MCM6_HUMAN]	1	Q14566	S762	DNA replication licensing factor MCM6 (EC 3.6.4.12) (p105MCM)	MCM6																					Forward	Class I	eIESEIDsEEELINk	1	N-Term(Dimethyl:2H(4)); S8(Phospho); K15(Dimethyl:2H(4))	61	ETD	14	0	1920.92	3	640.978	0.72	130.84	11150	OR5_101215_LM_HJ_Epac1_007_SCX_Phospho_F14.raw
RSSTSGDpTEEEEEEEVVPFSSDEQK	1	S(2): 0.0; S(3): 0.0; T(4): 0.0; S(5): 0.0; T(8): 100.0; S(20): 0.0; S(21): 0.0	386	O15231	Zinc finger protein 185 OS=Homo sapiens GN=ZNF185 PE=1 SV=2 - [ZN185_HUMAN]	1	O15231	T23	Zinc finger protein 185 (LIM domain protein ZNF185) (P1-A)	ZNF185																					Reverse	Class I	rSSTSGDtEEEEEEEVVPFSSDEQk	1	N-Term(Dimethyl); T8(Phospho); K25(Dimethyl)	52	HCD	28	1	2966.24	3	989.418	2.76	130.85	11330	20110114_LM_HJ_Epac_Rev_007_F28_2.raw
EREEpSEDELEEANGNNPIDIEVDQNK	1	S(5): 100.0	386	Q9UKL0	REST corepressor 1 OS=Homo sapiens GN=RCOR1 PE=1 SV=1 - [RCOR1_HUMAN]	1	Q9UKL0	S257	REST corepressor 1 (Protein CoREST)	RCOR1 KIAA0071 RCOR																					Reverse	Class I	eREEsEDELEEANGNNPIDIEVDQNk	1	N-Term(Dimethyl); S5(Phospho); K26(Dimethyl)	74	HCD	27	1	3151.36	3	1051.13	0.74	137.68	11450	20110114_LM_HJ_Epac_Rev_007_F27_2.raw
IEDVGpSDEEDDSGKDK	1	S(6): 100.0; S(12): 0.0	386	P08238	Heat shock protein HSP 90-beta OS=Homo sapiens GN=HSP90AB1 PE=1 SV=4 - [HS90B_HUMAN]	1	P08238	S255	Heat shock protein HSP 90-beta (HSP 90) (Heat shock 84 kDa) (HSP 84) (HSP84)	HSP90AB1 HSP90B HSPC2 HSPCB																					Forward	Class I	iEDVGsDEEDDSGkDk	1	N-Term(Dimethyl); S6(Phospho); K14(Dimethyl); K16(Dimethyl)	95	ETD	27	1	1901.79	3	634.602	0.33	45.2	3014	OR5_101221_LM_HJ_Epac1_007_SCX_Phospho_F27.raw
GNGSGGpSRENSTVDFSK	1	S(4): 0.0; S(7): 100.0; S(11): 0.0; T(12): 0.0; S(16): 0.0	386	Q9Y6M7	Sodium bicarbonate cotransporter 3 OS=Homo sapiens GN=SLC4A7 PE=1 SV=1 - [S4A7_HUMAN]	1	Q9Y6M7	S403	Sodium bicarbonate cotransporter 3 (Sodium bicarbonate cotransporter 2) (Sodium bicarbonate cotransporter 2b) (Bicarbonate transporter) (Solute carrier family 4 member 7)	SLC4A7 BT NBC2 NBC2B NBC3 SBC2 SLC4A6																					Forward	Class I	gNGSGGsRENSTVDFSk	1	N-Term(Dimethyl); S7(Phospho); K17(Dimethyl)	110	ETD	28	1	1834.8	3	612.271	0.5	57.12	4159	OR5_101217_LM_HJ_Epac1_007_SCX_Phospho_F28.raw
RTSpSTLDSEGTFNSYRK	1	T(2): 0.0; S(3): 0.0; S(4): 99.9; T(5): 0.1; S(8): 0.0; T(11): 0.0; S(14): 0.0; Y(15): 0.0	386	Q92609	TBC1 domain family member 5 OS=Homo sapiens GN=TBC1D5 PE=1 SV=1 - [TBCD5_HUMAN]	1	Q92609	S44	TBC1 domain family member 5	TBC1D5 KIAA0210																					Forward	Class I	rTSsTLDSEGTFNSYRk	1	N-Term(Dimethyl); S4(Phospho); K17(Dimethyl)	85	ETD	33	2	2084.97	3	695.661	1.72	74.93	4668	OR5_101221_LM_HJ_Epac1_007_SCX_Phospho_F33.raw
RSApSTEKLEQGTSALIR	1	S(2): 0.0; S(4): 100.0; T(5): 0.0; T(12): 0.0; S(13): 0.0	386	Q8IWC1	MAP7 domain-containing protein 3 OS=Homo sapiens GN=MAP7D3 PE=1 SV=2 - [MA7D3_HUMAN]	1	Q8IWC1	S185	MAP7 domain-containing protein 3	MAP7D3																					Forward	Class I	rSAsTEkLEQGTSALIR	1	N-Term(Dimethyl); S4(Phospho); K7(Dimethyl)	90	ETD	32	2	1983.03	3	661.681	-0.03	89.68	5250	OR5_101221_LM_HJ_Epac1_007_SCX_Phospho_F32.raw
VTGTEGSSSTLVDYTSTSSTGGpSPVRK	1	T(2): 0.0; T(4): 0.0; S(7): 0.0; S(8): 0.0; S(9): 0.0; T(10): 0.0; Y(14): 0.0; T(15): 0.0; S(16): 0.0; T(17): 0.0; S(18): 0.0; S(19): 0.0; T(20): 0.0; S(23): 100.0	386	Q7Z6E9	Retinoblastoma-binding protein 6 OS=Homo sapiens GN=RBBP6 PE=1 SV=1 - [RBBP6_HUMAN]	1	Q7Z6E9	S1277	E3 ubiquitin-protein ligase RBBP6 (EC 6.3.2.-) (Proliferation potential-related protein) (Protein P2P-R) (Retinoblastoma-binding Q protein 1) (RBQ-1) (Retinoblastoma-binding protein 6) (p53-associated cellular protein of testis)	RBBP6 P2PR PACT RBQ1 My038																					Forward	Class I	vTGTEGSSSTLVDYTSTSSTGGsPVRk	1	N-Term(Dimethyl); S23(Phospho); K27(Dimethyl)	71	HCD	27	1	2797.32	3	933.11	0.89	91.03	6028	OR5_101217_LM_HJ_Epac1_007_SCX_Phospho_F27.raw
QRSApSQSpSLDKLDQELK	2	S(3): 0.0; S(5): 100.0; S(7): 0.0; S(8): 100.0	386	O60271	C-jun-amino-terminal kinase-interacting protein 4 OS=Homo sapiens GN=SPAG9 PE=1 SV=4 - [JIP4_HUMAN]	1	O60271	S730, S733	C-Jun-amino-terminal kinase-interacting protein 4 (JIP-4) (JNK-interacting protein 4) (Cancer/testis antigen 89) (CT89) (Human lung cancer oncogene 6 protein) (HLC-6) (JNK-associated leucine-zipper protein) (JLP) (Mitogen-activated protein kinase 8-interacting protein 4) (Proliferation-inducing protein 6) (Protein highly expressed in testis) (PHET) (Sperm surface protein) (Sperm-associated antige…	SPAG9 HSS KIAA0516 MAPK8IP4 SYD1 HLC6																					Reverse	Class I	qRSAsQSsLDkLDQELk	1	N-Term(Dimethyl); S5(Phospho); S8(Phospho); K11(Dimethyl); K17(Dimethyl)	94	ETD	28	2	2177.02	3	726.344	-2.96	105.98	7094	20110105_LM_HJ_Epac_Rev_007_F28_2.raw
RSpTQGVTLTDLQEAEK	1	S(2): 0.3; T(3): 99.7; T(7): 0.0; T(9): 0.0	386	O14974	Protein phosphatase 1 regulatory subunit 12A OS=Homo sapiens GN=PPP1R12A PE=1 SV=1 - [MYPT1_HUMAN]	1	O14974	T696	Protein phosphatase 1 regulatory subunit 12A (Myosin phosphatase-targeting subunit 1) (Myosin phosphatase target subunit 1) (Protein phosphatase myosin-binding subunit)	PPP1R12A MBS MYPT1																					Forward	Class I	rStQGVTLTDLQEAEk	1	N-Term(Dimethyl); T3(Phospho); K16(Dimethyl)	66	HCD	28	1	1911.94	2	956.475	0.08	104.21	7174	OR5_101221_LM_HJ_Epac1_007_SCX_Phospho_F28.raw
ASVpSPMDEPVPDSESPIEK	1	S(2): 0.0; S(4): 100.0; S(13): 0.0; S(15): 0.0	386	P46821	Microtubule-associated protein 1B OS=Homo sapiens GN=MAP1B PE=1 SV=1 - [MAP1B_HUMAN]	1	P46821	S1378	Microtubule-associated protein 1B (MAP-1B) [Cleaved into: MAP1 light chain LC1]	MAP1B																					Reverse	Class I	aSVsPMDEPVPDSESPIEk	1	N-Term(Dimethyl:2H(4)); S4(Phospho); K19(Dimethyl:2H(4))	96	HCD	13	0	2158.01	2	1079.51	-0.05	109.12	8034	20110105_LM_HJ_Epac_Rev_007_F13.raw
MSPNETLFLEpSTNK	1	S(2): 0.0; T(6): 0.0; S(11): 100.0; T(12): 0.0	385	Q9HB90	Ras-related GTP-binding protein C OS=Homo sapiens GN=RRAGC PE=1 SV=1 - [RRAGC_HUMAN]	1	Q9HB90	S95	Ras-related GTP-binding protein C (Rag C) (RagC) (GTPase-interacting protein 2) (TIB929)	RRAGC																					Forward	Class I	mSPNETLFLEsTNk	1	N-Term(Dimethyl); S11(Phospho); K14(Dimethyl)	75	ETD	14	0	1746.8	3	582.94	1.11	137.06	10027	OR5_101221_LM_HJ_Epac1_007_SCX_Phospho_F14.raw
FIIGSVSEDNpSEDEISNLVK	1	S(5): 0.0; S(7): 0.0; S(11): 100.0; S(16): 0.0	385	Q13085	Acetyl-CoA carboxylase 1 OS=Homo sapiens GN=ACACA PE=1 SV=2 - [ACACA_HUMAN]	1	Q13085	S29	Acetyl-CoA carboxylase 1 (ACC1) (EC 6.4.1.2) (ACC-alpha) [Includes: Biotin carboxylase (EC 6.3.4.14)]	ACACA ACAC ACC1 ACCA																					Forward	Class I	fIIGSVSEDNsEDEISNLVk	1	N-Term(Dimethyl); S11(Phospho); K20(Dimethyl)	87	HCD	13	0	2331.09	3	777.703	-2.8	147.38	10077	OR5_101216_LM_HJ_Epac1_007_SCX_Phospho_F13.raw
KLEAMTNSKQpSIAK	1	T(6): 0.0; S(8): 0.0; S(11): 100.0	385	P18206	Vinculin OS=Homo sapiens GN=VCL PE=1 SV=4 - [VINC_HUMAN]	1	P18206	S383	Vinculin (Metavinculin)	VCL																					Reverse	Class I	kLEAmTNSkQsIAk	1	N-Term(Dimethyl); K1(Dimethyl); M5(Oxidation); K9(Dimethyl); S11(Phospho); K14(Dimethyl)	76	ETD	32	2	1756.93	3	586.314	0.08	36.01	2470	20110105_LM_HJ_Epac_Rev_007_F32_2.raw
KLESTESRSpSFSQHAR	1	S(4): 0.0; T(5): 0.0; S(7): 0.0; S(9): 0.0; S(10): 100.0; S(12): 0.0	385	P02545	Lamin-A/C OS=Homo sapiens GN=LMNA PE=1 SV=1 - [LMNA_HUMAN]	1	P02545	S429	Prelamin-A/C [Cleaved into: Lamin-A/C (70 kDa lamin) (Renal carcinoma antigen NY-REN-32)]	LMNA LMN1																					Forward	Class I	kLESTESRSsFSQHAR	1	N-Term(Dimethyl:2H(4)); K1(Dimethyl:2H(4)); S10(Phospho)	97	ETD	39	2	1993.99	3	665.336	-0.44	36.32	2558	OR5_101217_LM_HJ_Epac1_007_SCX_Phospho_F39.raw
ERSENLpSLRR	1	S(3): 0.0; S(7): 100.0	385	Q5U651	Ras-interacting protein 1 OS=Homo sapiens GN=RASIP1 PE=1 SV=1 - [RAIN_HUMAN]	1	Q5U651	S322	Ras-interacting protein 1 (Rain)	RASIP1																					Reverse	Class I	eRSENLsLRR	1	N-Term(Dimethyl); S7(Phospho)	58	ETD	35	2	1367.68	3	456.565	0.07	47.49	3138	20110105_LM_HJ_Epac_Rev_007_F35.raw
ELVSSSSSGSDpSDSEVDKK	1	S(4): 0.0; S(5): 0.0; S(6): 0.0; S(7): 0.0; S(8): 0.0; S(10): 0.2; S(12): 99.8; S(14): 0.0	385	P53999	Activated RNA polymerase II transcriptional coactivator p15 OS=Homo sapiens GN=SUB1 PE=1 SV=3 - [TCP4_HUMAN]	1	P53999	S17	Activated RNA polymerase II transcriptional coactivator p15 (Positive cofactor 4) (PC4) (SUB1 homolog) (p14)	SUB1 PC4 RPO2TC1																					Forward	Class I	eLVSSSSSGSDsDSEVDkk	1	N-Term(Dimethyl:2H(4)); S12(Phospho); K18(Dimethyl:2H(4)); K19(Dimethyl:2H(4))	96	ETD	27	1	2119	3	707.006	-1.66	47.84	3278	OR5_101217_LM_HJ_Epac1_007_SCX_Phospho_F27.raw
RLpSTSPDVIQGHQPR	1	S(3): 100.0; T(4): 0.0; S(5): 0.0	385	Q9Y385	Ubiquitin-conjugating enzyme E2 J1 OS=Homo sapiens GN=UBE2J1 PE=1 SV=2 - [UB2J1_HUMAN]	1	Q9Y385	S266	Ubiquitin-conjugating enzyme E2 J1 (EC 6.3.2.19) (Non-canonical ubiquitin-conjugating enzyme 1) (NCUBE-1) (Yeast ubiquitin-conjugating enzyme UBC6 homolog E) (HsUBC6e)	UBE2J1 NCUBE1 CGI-76 HSPC153 HSPC205																					Forward	Class I	rLsTSPDVIQGHQPR	1	N-Term(Dimethyl); S3(Phospho)	83	ETD	33	1	1798.89	3	600.303	-0.62	66.41	4225	OR5_101221_LM_HJ_Epac1_007_SCX_Phospho_F33.raw
RTHpSEGSLLQEPR	1	T(2): 0.0; S(4): 100.0; S(7): 0.0	385	P49796	Regulator of G-protein signaling 3 OS=Homo sapiens GN=RGS3 PE=1 SV=2 - [RGS3_HUMAN]	1	P49796	S943	Regulator of G-protein signaling 3 (RGP3) (RGS3)	RGS3																					Forward	Class I	rTHsEGSLLQEPR	1	N-Term(Dimethyl:2H(4)); S4(Phospho)	99	ETD	35	1	1621.8	3	541.272	0.73	70.59	4516	OR5_101217_LM_HJ_Epac1_007_SCX_Phospho_F35.raw
NKFGpSADNIAHLK	1	S(5): 100.0	385	Q9ULS5	Transmembrane and coiled-coil domains protein 3 OS=Homo sapiens GN=TMCC3 PE=2 SV=2 - [TMCC3_HUMAN]	1	Q9ULS5	S216	Transmembrane and coiled-coil domains protein 3	TMCC3 KIAA1145																					Reverse	Class I	nkFGsADNIAHLk	1	N-Term(Dimethyl); K2(Dimethyl); S5(Phospho); K13(Dimethyl)	71	ETD	32	1	1578.81	3	526.94	1.83	82.84	5114	20110105_LM_HJ_Epac_Rev_007_F32.raw
LGAGGGpSPEKpSPSAQELK	2	S(7): 100.0; S(11): 100.0; S(13): 0.0	385	Q9UNE7	STIP1 homology and U box-containing protein 1 OS=Homo sapiens GN=STUB1 PE=1 SV=2 - [STUB1_HUMAN]	1	Q9UNE7	S19, S23	E3 ubiquitin-protein ligase CHIP (EC 6.3.2.-) (Antigen NY-CO-7) (CLL-associated antigen KW-8) (Carboxy terminus of Hsp70-interacting protein) (STIP1 homology and U box-containing protein 1)	STUB1 CHIP PP1131																					Forward	Class I	lGAGGGsPEksPSAQELk	1	N-Term(Dimethyl:2H(4)); S7(Phospho); K10(Dimethyl:2H(4)); S11(Phospho); K18(Dimethyl:2H(4))	91	ETD	14	1	1968.98	3	656.998	-2.65	69.82	5130	OR5_101221_LM_HJ_Epac1_007_SCX_Phospho_F14.raw
LHVGNIpSPTCTNK	1	S(7): 100.0; T(9): 0.0; T(11): 0.0	385	Q9BWF3	RNA-binding protein 4 OS=Homo sapiens GN=RBM4 PE=1 SV=1 - [RBM4_HUMAN]	1	Q9BWF3	S86	RNA-binding protein 4 (Lark homolog) (hLark) (RNA-binding motif protein 4) (RNA-binding motif protein 4a)	RBM4 RBM4A																					Reverse	Class I	lHVGNIsPTcTNk	1	N-Term(Dimethyl:2H(4)); S7(Phospho); C10(Carbamidomethyl); K13(Dimethyl:2H(4))	94	ETD	29	0	1584.8	3	528.939	-1.34	74.7	5198	20110105_LM_HJ_Epac_Rev_007_F29_2.raw
RSALSSpSLRDLSEAGK	1	S(2): 0.0; S(5): 0.0; S(6): 0.0; S(7): 100.0; S(12): 0.0	385	Q6DN90	IQ motif and SEC7 domain-containing protein 1 OS=Homo sapiens GN=IQSEC1 PE=1 SV=1 - [IQEC1_HUMAN]	1	Q6DN90	S925	IQ motif and SEC7 domain-containing protein 1 (ADP-ribosylation factors guanine nucleotide-exchange protein 100) (ADP-ribosylation factors guanine nucleotide-exchange protein 2) (Brefeldin-resistant Arf-GEF 2 protein)	IQSEC1 ARFGEP100 BRAG2 KIAA0763																					Forward	Class I	rSALSSsLRDLSEAGk	1	N-Term(Dimethyl); S7(Phospho); K16(Dimethyl)	108	ETD	33	2	1812.92	3	604.979	0.57	93.16	5683	OR5_101217_LM_HJ_Epac1_007_SCX_Phospho_F33.raw
RPLpSGPDVGTPQPAGLASGAK	1	S(4): 100.0; T(10): 0.0; S(18): 0.0	385	O96013	Serine/threonine-protein kinase PAK 4 OS=Homo sapiens GN=PAK4 PE=1 SV=1 - [PAK4_HUMAN]	1	O96013	S181	Serine/threonine-protein kinase PAK 4 (EC 2.7.11.1) (p21-activated kinase 4) (PAK-4)	PAK4 KIAA1142																					Reverse	Class I	rPLsGPDVGTPQPAGLASGAk	1	N-Term(Dimethyl); S4(Phospho); K21(Dimethyl)	91	ETD	28	0	2112.09	3	704.701	1	90.8	6229	20110105_LM_HJ_Epac_Rev_007_F28.raw
SHVEDGDIAGAPASpSPEAPPAEQDPVQLK	1	S(1): 0.0; S(14): 0.9; S(15): 99.1	385	Q9P2E9	Ribosome-binding protein 1 OS=Homo sapiens GN=RRBP1 PE=1 SV=4 - [RRBP1_HUMAN]	1	Q9P2E9	S1277	Ribosome-binding protein 1 (180 kDa ribosome receptor homolog) (RRp) (ES/130-related protein) (Ribosome receptor protein)	RRBP1 KIAA1398																					Reverse	Class I	sHVEDGDIAGAPASsPEAPPAEQDPVQLk	1	N-Term(Dimethyl:2H(4)); S15(Phospho); K29(Dimethyl:2H(4))	56	HCD	28	0	3056.46	3	1019.49	-2.96	102.15	6879	20110105_LM_HJ_Epac_Rev_007_F28.raw
TpSVQTEDDQLIAGQSAR	1	T(1): 3.0; S(2): 97.0; T(5): 0.0; S(15): 0.0	385	P35221;P26232	Catenin alpha-1 OS=Homo sapiens GN=CTNNA1 PE=1 SV=1 - [CTNA1_HUMAN]|Catenin alpha-2 OS=Homo sapiens GN=CTNNA2 PE=1 SV=5 - [CTNA2_HUMAN]	2	P35221	S655	Catenin alpha-1 (Alpha E-catenin) (Cadherin-associated protein) (Renal carcinoma antigen NY-REN-13)	CTNNA1	P26232		Catenin alpha-2 (Alpha N-catenin) (Alpha-catenin-related protein)	CTNNA2 CAPR																	Forward	Class I	tsVQTEDDQLIAGQSAR	1	N-Term(Dimethyl:2H(4)); S2(Phospho)	98	ETD	13	0	1930.91	3	644.308	1.57	98.83	7069	OR5_101221_LM_HJ_Epac1_007_SCX_Phospho_F13.raw
ILIVTQpTPHYMR	1	T(5): 0.0; T(7): 100.0; Y(10): 0.0	385	Q6PKG0	La-related protein 1 OS=Homo sapiens GN=LARP1 PE=1 SV=2 - [LARP1_HUMAN]	1	Q6PKG0	T649	La-related protein 1 (La ribonucleoprotein domain family member 1)	LARP1 KIAA0731 LARP																					Forward	Class I	iLIVTQtPHYMR	1	N-Term(Dimethyl:2H(4)); T7(Phospho)	62	ETD	28	0	1583.83	3	528.616	1.23	116.35	8316	OR5_101217_LM_HJ_Epac1_007_SCX_Phospho_F28.raw
QIpSQDVKLEPDILLR	1	S(3): 100.0	385	Q01433	AMP deaminase 2 OS=Homo sapiens GN=AMPD2 PE=1 SV=2 - [AMPD2_HUMAN]	1	Q01433	S168	AMP deaminase 2 (EC 3.5.4.6) (AMP deaminase isoform L)	AMPD2																					Reverse	Class I	qIsQDVkLEPDILLR	1	N-Term(Dimethyl:2H(4)); S3(Phospho); K7(Dimethyl:2H(4))	83	ETD	27	1	1911.06	3	637.693	-8.12	139.1	9007	20110105_LM_HJ_Epac_Rev_007_F27.raw
RFpSMEGISNILQSGIR	1	S(3): 100.0; S(8): 0.0; S(13): 0.0	385	Q99689	Fasciculation and elongation protein zeta-1 OS=Homo sapiens GN=FEZ1 PE=1 SV=1 - [FEZ1_HUMAN]	1	Q99689	S316	Fasciculation and elongation protein zeta-1 (Zygin I) (Zygin-1)	FEZ1																					Reverse	Class I	rFsMEGISNILQSGIR	1	N-Term(Dimethyl); S3(Phospho)	77	ETD	28	1	1915.95	3	639.321	0.94	145.95	9274	20110105_LM_HJ_Epac_Rev_007_F28.raw
NQSLGQpSAPSLTAGLK	1	S(3): 0.0; S(7): 100.0; S(10): 0.0; T(12): 0.0	384	Q6P0Q8	Microtubule-associated serine/threonine-protein kinase 2 OS=Homo sapiens GN=MAST2 PE=1 SV=2 - [MAST2_HUMAN]	1	Q6P0Q8	S148	Microtubule-associated serine/threonine-protein kinase 2 (EC 2.7.11.1)	MAST2 KIAA0807 MAST205																					Forward	Class I	nQSLGQsAPSLTAGLk	1	N-Term(Dimethyl:2H(4)); S7(Phospho); K16(Dimethyl:2H(4))	79	ETD	14	0	1715.92	3	572.644	0.09	117.27	10083	OR5_101215_LM_HJ_Epac1_007_SCX_Phospho_F14.raw
KSSPSTGpSLDSGNESK	1	S(2): 0.0; S(3): 0.0; S(5): 0.0; T(6): 0.0; S(8): 100.0; S(11): 0.0; S(15): 0.0	384	Q15057	Centaurin-beta-2 OS=Homo sapiens GN=CENTB2 PE=1 SV=3 - [CENB2_HUMAN]	1	Q15057	S384	Arf-GAP with coiled-coil, ANK repeat and PH domain-containing protein 2 (Centaurin-beta-2) (Cnt-b2)	ACAP2 CENTB2 KIAA0041																					Forward	Class I	kSSPSTGsLDSGNESk	1	N-Term(Dimethyl); K1(Dimethyl); S8(Phospho); K16(Dimethyl)	95	ETD	29	1	1744.8	3	582.272	1.55	33.64	2559	OR5_101217_LM_HJ_Epac1_007_SCX_Phospho_F29.raw
TPHYGSQpTPLHDGSR	1	T(1): 0.0; Y(4): 0.0; S(6): 0.0; T(8): 100.0; S(14): 0.0	384	O00267	Transcription elongation factor SPT5 OS=Homo sapiens GN=SUPT5H PE=1 SV=1 - [SPT5H_HUMAN]	1	O00267	T806	Transcription elongation factor SPT5 (hSPT5) (DRB sensitivity-inducing factor 160 kDa subunit) (DSIF p160) (DRB sensitivity-inducing factor large subunit) (DSIF large subunit) (Tat-cotransactivator 1 protein) (Tat-CT1 protein)	SUPT5H SPT5 SPT5H																					Forward	Class I	tPHYGSQtPLHDGSR	1	N-Term(Dimethyl:2H(4)); T8(Phospho)	77	ETD	33	0	1764.8	3	588.938	-0.42	46.11	3134	OR5_101217_LM_HJ_Epac1_007_SCX_Phospho_F33.raw
QLAELETEDGMQEpSP	1	T(7): 0.0; S(14): 100.0	384	Q96QG7	Myotubularin-related protein 9 OS=Homo sapiens GN=MTMR9 PE=1 SV=1 - [MTMR9_HUMAN]	1	Q96QG7	S548	Myotubularin-related protein 9	MTMR9 C8orf9 MTMR8																					Forward	Class I	qLAELETEDGmQEsP	1	N-Term(Dimethyl); M11(Oxidation); S14(Phospho)	105	ETD	6	0	1800.73	3	600.914	0.77	71.9	5228	OR5_101217_LM_HJ_Epac1_007_SCX_Phospho_F6.raw
VEQALSEVApSpSLQSSAPK	2	S(6): 0.0; S(10): 100.0; S(11): 100.0; S(14): 0.0; S(15): 0.0	384	Q86TV6	Tetratricopeptide repeat protein 7B OS=Homo sapiens GN=TTC7B PE=1 SV=2 - [TTC7B_HUMAN]	1	Q86TV6	S575, S576	Tetratricopeptide repeat protein 7B (TPR repeat protein 7B) (Tetratricopeptide repeat protein 7-like-1) (TPR repeat protein 7-like-1)	TTC7B TTC7L1																					Reverse	Class I	vEQALSEVAssLQSSAPk	1	N-Term(Dimethyl); S10(Phospho); S11(Phospho); K18(Dimethyl)	106	ETD	8	0	2046.94	3	682.985	0.08	76.18	5324	20110105_LM_HJ_Epac_Rev_007_F8.raw
YAYKAEPYVApSEYK	1	Y(1): 0.0; Y(3): 0.0; Y(8): 0.0; S(11): 100.0; Y(13): 0.0	384	Q9BZ29	Dedicator of cytokinesis protein 9 OS=Homo sapiens GN=DOCK9 PE=1 SV=2 - [DOCK9_HUMAN]	1	Q9BZ29	S927	Dedicator of cytokinesis protein 9 (Cdc42 guanine nucleotide exchange factor zizimin-1)	DOCK9 KIAA1058																					Reverse	Class I	yAYkAEPYVAsEYk	1	N-Term(Dimethyl:2H(4)); K4(Dimethyl:2H(4)); S11(Phospho); K14(Dimethyl:2H(4))	63	ETD	28	1	1857.94	3	619.985	-2.93	96.11	6511	20110105_LM_HJ_Epac_Rev_007_F28_2.raw
HLDVDLDRQpSLSSIDK	1	S(10): 100.0; S(12): 0.0; S(13): 0.0	384	Q9Y6D5	Brefeldin A-inhibited guanine nucleotide-exchange protein 2 OS=Homo sapiens GN=ARFGEF2 PE=1 SV=3 - [BIG2_HUMAN]	1	Q9Y6D5	S1511	Brefeldin A-inhibited guanine nucleotide-exchange protein 2 (Brefeldin A-inhibited GEP 2)	ARFGEF2 ARFGEP2 BIG2																					Forward	Class I	hLDVDLDRQsLSSIDk	1	N-Term(Dimethyl); S10(Phospho); K16(Dimethyl)	107	ETD	32	1	1976.97	3	659.661	0.32	116.49	6704	OR5_101217_LM_HJ_Epac1_007_SCX_Phospho_F32.raw
QIDSpSPVGGETDETTVSQNYR	1	S(4): 0.6; S(5): 99.4; T(11): 0.0; T(14): 0.0; T(15): 0.0; S(17): 0.0; Y(20): 0.0	384	O15027	Protein transport protein Sec16A OS=Homo sapiens GN=SEC16A PE=1 SV=3 - [SC16A_HUMAN]	1	O15027	S391	Protein transport protein Sec16A (SEC16 homolog A)	SEC16A KIAA0310 SEC16 SEC16L																					Forward	Class I	qIDSsPVGGETDETTVSQNYR	1	N-Term(Dimethyl:2H(4)); S5(Phospho)	56	HCD	14	0	2395.06	3	799.025	0.54	84.75	7399	OR5_101215_LM_HJ_Epac1_007_SCX_Phospho_F14.raw
GSDALSETSpSVSHIEDLEK	1	S(2): 0.0; S(6): 0.0; T(8): 0.0; S(9): 0.0; S(10): 100.0; S(12): 0.0	384	Q6P996	Pyridoxal-dependent decarboxylase domain-containing protein 1 OS=Homo sapiens GN=PDXDC1 PE=1 SV=2 - [PDXD1_HUMAN]	1	Q6P996	S722	Pyridoxal-dependent decarboxylase domain-containing protein 1 (EC 4.1.1.-)	PDXDC1 KIAA0251																					Forward	Class I	gSDALSETSsVSHIEDLEk	1	N-Term(Dimethyl); S10(Phospho); K19(Dimethyl)	101	ETD	27	0	2139.97	3	713.995	0.22	116.27	7670	OR5_101217_LM_HJ_Epac1_007_SCX_Phospho_F27.raw
WGPGSpSVGSLQALSSSQR	1	S(5): 0.0; S(6): 100.0; S(9): 0.0; S(14): 0.0; S(15): 0.0; S(16): 0.0	383	P48681	Nestin OS=Homo sapiens GN=NES PE=1 SV=2 - [NEST_HUMAN]	1	P48681	S1442	Nestin	NES Nbla00170																					Forward	Class I	wGPGSsVGSLQALSSSQR	1	N-Term(Dimethyl:2H(4)); S6(Phospho)	104	ETD	14	0	1915.92	3	639.312	0.42	137.75	10085	OR5_101221_LM_HJ_Epac1_007_SCX_Phospho_F14.raw
SLGLSLpSGGDQEDAGR	1	S(1): 0.0; S(5): 0.0; S(7): 100.0	383	Q9UJ70	N-acetyl-D-glucosamine kinase OS=Homo sapiens GN=NAGK PE=1 SV=4 - [NAGK_HUMAN]	1	Q9UJ70	S76	N-acetyl-D-glucosamine kinase (N-acetylglucosamine kinase) (EC 2.7.1.59) (GlcNAc kinase)	NAGK																					Forward	Class I	sLGLSLsGGDQEDAGR	1	N-Term(Dimethyl); S7(Phospho)	89	ETD	14	0	1669.74	3	557.253	0.32	122.67	10520	OR5_101215_LM_HJ_Epac1_007_SCX_Phospho_F14.raw
ELDEGRYGVYEDENYEVGpSDDEEIPFK	1	Y(7): 0.0; Y(10): 0.0; Y(15): 0.0; S(19): 100.0	383	O15541	RING finger protein 113A OS=Homo sapiens GN=RNF113A PE=1 SV=1 - [R113A_HUMAN]	1	O15541	S253	RING finger protein 113A (Zinc finger protein 183)	RNF113A RNF113 ZNF183																					Reverse	Class I	eLDEGRYGVYEDENYEVGsDDEEIPFk	1	N-Term(Dimethyl); S19(Phospho); K27(Dimethyl)	57	HCD	27	1	3332.45	3	1111.49	13.78	146.24	12274	20110114_LM_HJ_Epac_Rev_007_F27_2.raw
GGpSPAPYVDTFLNAPDILPR	1	S(3): 100.0; Y(7): 0.0; T(10): 0.0	383	Q5U651	Ras-interacting protein 1 OS=Homo sapiens GN=RASIP1 PE=1 SV=1 - [RAIN_HUMAN]	1	Q5U651	S419	Ras-interacting protein 1 (Rain)	RASIP1																					Reverse	Class I	gGsPAPYVDTFLNAPDILPR	1	N-Term(Dimethyl:2H(4)); S3(Phospho)	86	HCD	14	0	2212.1	2	1106.55	0.02	155.82	13300	20110114_LM_HJ_Epac_Rev_007_F14.raw
EGTAPpSENGETKAEEAQK	1	T(3): 0.0; S(6): 100.0; T(11): 0.0	383	Q15651	High mobility group nucleosome-binding domain-containing protein 3 OS=Homo sapiens GN=HMGN3 PE=1 SV=2 - [HMGN3_HUMAN]	1	Q15651	S78	High mobility group nucleosome-binding domain-containing protein 3 (Thyroid receptor-interacting protein 7) (TR-interacting protein 7) (TRIP-7)	HMGN3 TRIP7 PNAS-24																					Reverse	Class I	eGTAPsENGETkAEEAQk	1	N-Term(Dimethyl); S6(Phospho); K12(Dimethyl); K18(Dimethyl)	79	ETD	27	1	2039.91	3	680.642	-2.13	33.27	2336	20110105_LM_HJ_Epac_Rev_007_F27_2.raw
QHAADTSEARPFRGpSVGR	1	T(6): 0.0; S(7): 0.0; S(15): 100.0	383	Q9NUQ6	SPATS2-like protein OS=Homo sapiens GN=SPATS2L PE=2 SV=2 - [SPS2L_HUMAN]	1	Q9NUQ6	S526	SPATS2-like protein (DNA polymerase-transactivated protein 6) (Stress granule and nucleolar protein) (SGNP)	SPATS2L DNAPTP6 SP1224																					Reverse	Class I	qHAADTSEARPFRGsVGR	1	N-Term(Dimethyl); S15(Phospho)	84	ETD	39	1	2049.96	3	683.991	-1.19	38.32	2632	20110105_LM_HJ_Epac_Rev_007_F39.raw
APVQPQQpSPAAAPGGTDEKPSGK	1	S(8): 100.0; T(16): 0.0; S(21): 0.0	383	Q13200	26S proteasome non-ATPase regulatory subunit 2 OS=Homo sapiens GN=PSMD2 PE=1 SV=3 - [PSMD2_HUMAN]	1	Q13200	S16	26S proteasome non-ATPase regulatory subunit 2 (26S proteasome regulatory subunit RPN1) (26S proteasome regulatory subunit S2) (26S proteasome subunit p97) (Protein 55.11) (Tumor necrosis factor type 1 receptor-associated protein 2)	PSMD2 TRAP2																					Forward	Class I	aPVQPQQsPAAAPGGTDEkPSGk	1	N-Term(Dimethyl:2H(4)); S8(Phospho); K19(Dimethyl:2H(4)); K23(Dimethyl:2H(4))	72	HCD	27	0	2394.24	2	1197.62	-1.27	43.78	2929	OR5_101221_LM_HJ_Epac1_007_SCX_Phospho_F27.raw
TGRDpTPENGETAIGAENSEK	1	T(1): 0.0; T(5): 100.0; T(11): 0.0; S(18): 0.0	383	Q8N3X1	Formin-binding protein 4 OS=Homo sapiens GN=FNBP4 PE=1 SV=2 - [FNBP4_HUMAN]	1	Q8N3X1	T479	Formin-binding protein 4 (Formin-binding protein 30)	FNBP4 FBP30 KIAA1014																					Forward	Class I	tGRDtPENGETAIGAENSEk	1	N-Term(Dimethyl:2H(4)); T5(Phospho); K20(Dimethyl:2H(4))	85	ETD	27	1	2220.03	3	740.681	1.01	52.54	3611	OR5_101217_LM_HJ_Epac1_007_SCX_Phospho_F27.raw
RSTITpSREIQTAVR	1	S(2): 0.0; T(3): 0.0; T(5): 0.0; S(6): 100.0; T(11): 0.0	383	P06899;Q99880;Q99879	Histone H2B type 1-J OS=Homo sapiens GN=HIST1H2BJ PE=1 SV=3 - [H2B1J_HUMAN]|Histone H2B type 1-L OS=Homo sapiens GN=HIST1H2BL PE=1 SV=3 - [H2B1L_HUMAN]|Histone H2B type 1-M OS=Homo sapiens GN=HIST1H2BM PE=1 SV=3 - [H2B1M_HUMAN]	3	P06899	S92	Histone H2B type 1-J (Histone H2B.1) (Histone H2B.r) (H2B/r)	HIST1H2BJ H2BFR	Q99880		Histone H2B type 1-L (Histone H2B.c) (H2B/c)	HIST1H2BL H2BFC	Q99879	S92	Histone H2B type 1-M (Histone H2B.e) (H2B/e)	HIST1H2BM H2BFE													Forward	Class I	rSTITsREIQTAVR	1	N-Term(Dimethyl); S6(Phospho)	66	ETD	33	2	1725.9	3	575.972	-0.28	69.55	4405	OR5_101221_LM_HJ_Epac1_007_SCX_Phospho_F33.raw
TEEGEIDYpSAEEGENRR	1	T(1): 0.0; Y(8): 0.0; S(9): 100.0	383	Q8WVV9	Heterogeneous nuclear ribonucleoprotein L-like OS=Homo sapiens GN=HNRPLL PE=1 SV=1 - [HNRLL_HUMAN]	1	Q8WVV9	S35	Heterogeneous nuclear ribonucleoprotein L-like (hnRNPLL) (Stromal RNA-regulating factor)	HNRPLL SRRF BLOCK24																					Forward	Class I	tEEGEIDYsAEEGENRR	1	N-Term(Dimethyl); S9(Phospho)	93	ETD	28	1	2091.85	3	697.955	0.42	67.69	4914	OR5_101217_LM_HJ_Epac1_007_SCX_Phospho_F28.raw
LTVENpSPKQEAGISEGQGTAGEEEEK	1	T(2): 0.0; S(6): 100.0; S(14): 0.0; T(19): 0.0	383	O43583	Density-regulated protein OS=Homo sapiens GN=DENR PE=1 SV=2 - [DENR_HUMAN]	1	O43583	S73	Density-regulated protein (DRP) (Protein DRP1) (Smooth muscle cell-associated protein 3) (SMAP-3)	DENR DRP1 H14																					Reverse	Class I	lTVENsPkQEAGISEGQGTAGEEEEk	1	N-Term(Dimethyl); S6(Phospho); K8(Dimethyl); K26(Dimethyl)	71	HCD	27	1	2881.32	3	961.11	-6.86	75.56	5050	20110105_LM_HJ_Epac_Rev_007_F27.raw
TWpTLCGTPEYLAPEIILSK	1	T(1): 0.3; T(3): 99.7; T(7): 0.0; Y(10): 0.0; S(18): 0.0	382	P17612;P22694	cAMP-dependent protein kinase catalytic subunit alpha OS=Homo sapiens GN=PRKACA PE=1 SV=2 - [KAPCA_HUMAN]|cAMP-dependent protein kinase catalytic subunit beta OS=Homo sapiens GN=PRKACB PE=1 SV=2 - [KAPCB_HUMAN]	2	P17612	T198	cAMP-dependent protein kinase catalytic subunit alpha (PKA C-alpha) (EC 2.7.11.11)	PRKACA PKACA	P22694	T198	cAMP-dependent protein kinase catalytic subunit beta (PKA C-beta) (EC 2.7.11.11)	PRKACB																	Reverse	Class I	tWtLcGTPEYLAPEIILSk	1	N-Term(Dimethyl); T3(Phospho); C5(Carbamidomethyl); K19(Dimethyl)	52	HCD	14	0	2328.17	3	776.727	2.93	154.43	11718	20110105_LM_HJ_Epac_Rev_007_F14.raw
KLGGLLPPGGEGGPEATVVpSDEDEAAEMEDEAVR	1	T(17): 0.0; S(20): 100.0	382	P51178	1-phosphatidylinositol-4,5-bisphosphate phosphodiesterase delta-1 OS=Homo sapiens GN=PLCD1 PE=1 SV=2 - [PLCD1_HUMAN]	1	P51178	S460	1-phosphatidylinositol 4,5-bisphosphate phosphodiesterase delta-1 (EC 3.1.4.11) (Phosphoinositide phospholipase C-delta-1) (Phospholipase C-III) (PLC-III) (Phospholipase C-delta-1) (PLC-delta-1)	PLCD1																					Reverse	Class I	kLGGLLPPGGEGGPEATVVsDEDEAAEmEDEAVR	1	K1(Dimethyl); N-Term(Dimethyl); S20(Phospho); M28(Oxidation)	84	HCD	28	1	3576.63	3	1192.88	-0.38	143.59	12129	20110114_LM_HJ_Epac_Rev_007_F28_2_110119042919.raw
LKSSpSpSSEDVASSNQK	2	S(3): 0.0; S(4): 0.0; S(5): 100.0; S(6): 100.0; S(7): 0.0; S(12): 0.0; S(13): 0.0	382	P51813	Cytoplasmic tyrosine-protein kinase BMX OS=Homo sapiens GN=BMX PE=1 SV=1 - [BMX_HUMAN]	1	P51813	S253, S254	Cytoplasmic tyrosine-protein kinase BMX (EC 2.7.10.2) (Bone marrow tyrosine kinase gene in chromosome X protein) (Epithelial and endothelial tyrosine kinase) (ETK) (NTK38)	BMX																					Reverse	Class I	lkSSssSEDVASSNQk	1	N-Term(Dimethyl); K2(Dimethyl); S5(Phospho); S6(Phospho); K16(Dimethyl)	92	ETD	15	1	1897.82	3	633.278	-0.24	35.63	2452	20110105_LM_HJ_Epac_Rev_007_F15.raw
LSpSLRApSTSKSESSQK	2	S(2): 0.0; S(3): 100.0; S(7): 99.9; T(8): 0.1; S(9): 0.0; S(11): 0.0; S(13): 0.0; S(14): 0.0	382	P62753	40S ribosomal protein S6 OS=Homo sapiens GN=RPS6 PE=1 SV=1 - [RS6_HUMAN]	1	P62753	S236, S240	40S ribosomal protein S6 (Phosphoprotein NP33)	RPS6 OK/SW-cl.2																					Forward	Class I	lSsLRAsTSkSESSQk	1	N-Term(Dimethyl); S3(Phospho); S7(Phospho); K10(Dimethyl); K16(Dimethyl)	85	ETD	28	2	1939.92	3	647.31	0.94	41.79	3049	OR5_101221_LM_HJ_Epac1_007_SCX_Phospho_F28.raw
VEAEAGGSGARpTPPLSR	1	S(8): 0.0; T(12): 100.0; S(16): 0.0	382	Q9Y3Q8	TSC22 domain family protein 4 OS=Homo sapiens GN=TSC22D4 PE=1 SV=2 - [T22D4_HUMAN]	1	Q9Y3Q8	T229	TSC22 domain family protein 4 (TSC22-related-inducible leucine zipper protein 2) (Tsc-22-like protein THG-1)	TSC22D4 THG1 TILZ2																					Reverse	Class I	vEAEAGGSGARtPPLSR	1	N-Term(Dimethyl:2H(4)); T12(Phospho)	84	ETD	28	1	1766.87	3	589.628	-2.14	47.14	3402	20110105_LM_HJ_Epac_Rev_007_F28.raw
SKpSIEEREEEYQR	1	S(1): 0.0; S(3): 100.0; Y(11): 0.0	382	Q15032;Q9UBL0	R3H domain-containing protein 1 OS=Homo sapiens GN=R3HDM1 PE=1 SV=3 - [R3HD1_HUMAN]|cAMP-regulated phosphoprotein 21 OS=Homo sapiens GN=ARPP21 PE=1 SV=2 - [ARP21_HUMAN]	2	Q15032	S282	R3H domain-containing protein 1	R3HDM1 KIAA0029 R3HDM	Q9UBL0		cAMP-regulated phosphoprotein 21 (ARPP-21) (Thymocyte cAMP-regulated phosphoprotein)	ARPP21 TARPP																	Forward	Class I	sksIEEREEEYQR	1	N-Term(Dimethyl); K2(Dimethyl); S3(Phospho)	66	ETD	33	2	1818.83	3	606.947	-0.07	56.04	3672	OR5_101217_LM_HJ_Epac1_007_SCX_Phospho_F33.raw
RLAAQESpSETEDMSVPR	1	S(7): 0.0; S(8): 100.0; T(10): 0.0; S(14): 0.0	382	Q641Q2;Q5SNT6	Protein FAM21A OS=Homo sapiens GN=FAM21A PE=1 SV=3 - [FA21A_HUMAN]|Protein FAM21B OS=Homo sapiens GN=FAM21B PE=1 SV=2 - [FA21B_HUMAN]	2	Q641Q2	S1054	WASH complex subunit FAM21A	FAM21A	Q5SNT6	S966	WASH complex subunit FAM21B	FAM21B																	Reverse	Class I	rLAAQESsETEDmSVPR	1	N-Term(Dimethyl); S8(Phospho); M13(Oxidation)	96	ETD	29	1	2029.88	3	677.299	-4.11	52.6	3766	20110105_LM_HJ_Epac_Rev_007_F29_2.raw
HGARTpSDSDQQAYLVQR	1	T(5): 0.0; S(6): 100.0; S(8): 0.0; Y(13): 0.0	382	Q96CV9	Optineurin OS=Homo sapiens GN=OPTN PE=1 SV=1 - [OPTN_HUMAN]	1	Q96CV9	S526	Optineurin (E3-14.7K-interacting protein) (FIP-2) (Huntingtin yeast partner L) (Huntingtin-interacting protein 7) (HIP-7) (Huntingtin-interacting protein L) (NEMO-related protein) (Optic neuropathy-inducing protein) (Transcription factor IIIA-interacting protein) (TFIIIA-IntP)	OPTN FIP2 GLC1E HIP7 HYPL NRP																					Forward	Class I	hGARTsDSDQQAYLVQR	1	N-Term(Dimethyl:2H(4)); S6(Phospho)	96	ETD	34	1	2043.96	3	681.99	0.56	63.58	4162	OR5_101217_LM_HJ_Epac1_007_SCX_Phospho_F34.raw
LGpSEEPSKEPSSPSAQLR	1	S(3): 100.0; S(7): 0.0; S(11): 0.0; S(12): 0.0; S(14): 0.0	382	Q8NFW9	Rab effector MyRIP OS=Homo sapiens GN=MYRIP PE=1 SV=2 - [MYRIP_HUMAN]	1	Q8NFW9	S534	Rab effector MyRIP (Exophilin-8) (Myosin-VIIa- and Rab-interacting protein) (Synaptotagmin-like protein lacking C2 domains C) (SlaC2-c) (Slp homolog lacking C2 domains c)	MYRIP SLAC2C																					Forward	Class I	lGsEEPSkEPSSPSAQLR	1	N-Term(Dimethyl:2H(4)); S3(Phospho); K8(Dimethyl:2H(4))	68	ETD	27	1	2043.03	3	681.681	1.37	74.15	4975	OR5_101217_LM_HJ_Epac1_007_SCX_Phospho_F27.raw
REGPVGGEpSDSEEMFEK	1	S(9): 100.0; S(11): 0.0	382	Q9Y4B5	Uncharacterized protein KIAA0802 OS=Homo sapiens GN=KIAA0802 PE=1 SV=3 - [K0802_HUMAN]	1	Q9Y4B5	S767	Coiled-coil domain-containing protein 165	CCDC165 KIAA0802																					Forward	Class I	rEGPVGGEsDSEEmFEk	1	N-Term(Dimethyl); S9(Phospho); M14(Oxidation); K17(Dimethyl)	77	ETD	29	1	2034.84	3	678.951	0.4	73.87	5342	OR5_101217_LM_HJ_Epac1_007_SCX_Phospho_F29.raw
VLGpSEGEEEDEALSPAK	1	S(4): 100.0; S(14): 0.0	382	P18858	DNA ligase 1 OS=Homo sapiens GN=LIG1 PE=1 SV=1 - [DNL1_HUMAN]	1	P18858	S66	DNA ligase 1 (EC 6.5.1.1) (DNA ligase I) (Polydeoxyribonucleotide synthase [ATP] 1)	LIG1																					Reverse	Class I	vLGsEGEEEDEALSPAk	1	N-Term(Dimethyl); S4(Phospho); K17(Dimethyl)	71	ETD	13	0	1895.85	3	632.622	0.36	98.18	7283	20110105_LM_HJ_Epac_Rev_007_F13.raw
GSGTApSDDEFENLR	1	S(2): 0.0; T(4): 0.0; S(6): 100.0	382	Q7Z6Z7	E3 ubiquitin-protein ligase HUWE1 OS=Homo sapiens GN=HUWE1 PE=1 SV=3 - [HUWE1_HUMAN]	1	Q7Z6Z7	S1907	E3 ubiquitin-protein ligase HUWE1 (EC 6.3.2.-) (ARF-binding protein 1) (ARF-BP1) (HECT, UBA and WWE domain-containing protein 1) (Homologous to E6AP carboxyl terminus homologous protein 9) (HectH9) (Large structure of UREB1) (LASU1) (Mcl-1 ubiquitin ligase E3) (Mule) (Upstream regulatory element-binding protein 1) (URE-B1) (URE-binding protein 1)	HUWE1 KIAA0312 KIAA1578 UREB1 HSPC272																					Reverse	Class I	gSGTAsDDEFENLR	1	N-Term(Dimethyl); S6(Phospho)	61	ETD	13	0	1605.64	3	535.886	-0.49	102.84	7607	20110105_LM_HJ_Epac_Rev_007_F13.raw
GNIETTSEDGQVFpSPKK	1	T(5): 0.0; T(6): 0.0; S(7): 0.0; S(14): 100.0	382	Q5T200	Zinc finger CCCH domain-containing protein 13 OS=Homo sapiens GN=ZC3H13 PE=1 SV=1 - [ZC3HD_HUMAN]	1	Q5T200	S993	Zinc finger CCCH domain-containing protein 13	ZC3H13 KIAA0853																					Reverse	Class I	gNIETTSEDGQVFsPkk	1	N-Term(Dimethyl:2H(4)); S14(Phospho); K16(Dimethyl:2H(4)); K17(Dimethyl:2H(4))	123	HCD	27	1	2013.05	2	1007.03	9.33	97.18	7944	20110114_LM_HJ_Epac_Rev_007_F27_2.raw
TVIRLPSGSGAApSPTGSAVDIR	1	T(1): 0.0; S(7): 0.0; S(9): 0.0; S(13): 100.0; T(15): 0.0; S(17): 0.0	382	Q09666	Neuroblast differentiation-associated protein AHNAK OS=Homo sapiens GN=AHNAK PE=1 SV=2 - [AHNK_HUMAN]	1	Q09666	S216	Neuroblast differentiation-associated protein AHNAK (Desmoyokin)	AHNAK PM227																					Forward	Class I	tVIRLPSGSGAAsPTGSAVDIR	1	N-Term(Dimethyl:2H(4)); S13(Phospho)	97	ETD	29	1	2224.16	3	742.058	-1.89	123.99	8127	OR5_101221_LM_HJ_Epac1_007_SCX_Phospho_F29.raw
ASTApSPCNNNINAATAVALQEPR	1	S(2): 0.0; T(3): 0.0; S(5): 100.0; T(15): 0.0	382	Q71RC2	La-related protein 4 OS=Homo sapiens GN=LARP4 PE=1 SV=3 - [LARP4_HUMAN]	1	Q71RC2	S597	La-related protein 4 (La ribonucleoprotein domain family member 4)	LARP4 PP13296																					Forward	Class I	aSTAsPcNNNINAATAVALQEPR	1	N-Term(Dimethyl:2H(4)); S5(Phospho); C7(Carbamidomethyl)	68	HCD	13	0	2482.17	3	828.06	-1.04	123.46	8691	OR5_101221_LM_HJ_Epac1_007_SCX_Phospho_F13.raw
KTSFDQDpSDVDIFPSDFPTEPPSLPR	1	T(2): 0.0; S(3): 0.0; S(8): 100.0; S(15): 0.0; T(19): 0.0; S(23): 0.0	382	Q02880	DNA topoisomerase 2-beta OS=Homo sapiens GN=TOP2B PE=1 SV=3 - [TOP2B_HUMAN]	1	Q02880	S1581	DNA topoisomerase 2-beta (EC 5.99.1.3) (DNA topoisomerase II, beta isozyme)	TOP2B																					Forward	Class I	kTSFDQDsDVDIFPSDFPTEPPSLPR	1	N-Term(Dimethyl); K1(Dimethyl); S8(Phospho)	54	HCD	27	1	3073.45	3	1025.15	12.79	145.78	9605	OR5_101217_LM_HJ_Epac1_007_SCX_Phospho_F27.raw
VNQSALEAVTPpSPSFQQR	1	S(4): 0.0; T(10): 0.0; S(12): 100.0; S(14): 0.0	382	Q9UKG1	DCC-interacting protein 13-alpha OS=Homo sapiens GN=APPL1 PE=1 SV=1 - [DP13A_HUMAN]	1	Q9UKG1	S401	DCC-interacting protein 13-alpha (Dip13-alpha) (Adapter protein containing PH domain, PTB domain and leucine zipper motif 1)	APPL1 APPL DIP13A KIAA1428																					Forward	Class I	vNQSALEAVTPsPSFQQR	1	N-Term(Dimethyl:2H(4)); S12(Phospho)	99	ETD	14	0	2071.01	3	691.01	-0.8	115.7	9969	OR5_101215_LM_HJ_Epac1_007_SCX_Phospho_F14.raw
IMSpSIGEGIDFSQER	1	S(3): 0.0; S(4): 100.0; S(12): 0.0	381	Q92625	Ankyrin repeat and SAM domain-containing protein 1A OS=Homo sapiens GN=ANKS1A PE=1 SV=4 - [ANS1A_HUMAN]	1	Q92625	S677	Ankyrin repeat and SAM domain-containing protein 1A (Odin)	ANKS1A ANKS1 KIAA0229 ODIN																					Forward	Class I	imSsIGEGIDFSQER	1	N-Term(Dimethyl:2H(4)); M2(Oxidation); S4(Phospho)	83	ETD	14	0	1796.81	3	599.608	0.63	125.3	10720	OR5_101215_LM_HJ_Epac1_007_SCX_Phospho_F14.raw
YVDSEGHLpYTVPIR	1	Y(1): 0.0; S(4): 0.0; Y(9): 100.0; T(10): 0.0	381	Q03135	Caveolin-1 OS=Homo sapiens GN=CAV1 PE=1 SV=4 - [CAV1_HUMAN]	1	Q03135	Y14	Caveolin-1	CAV1 CAV																					Reverse	Class I	yVDSEGHLyTVPIR	1	N-Term(Dimethyl); Y9(Phospho)	61	HCD	28	0	1756.83	2	878.92	1.18	124.35	10761	20110114_LM_HJ_Epac_Rev_007_F28_2.raw
SVpSEAALAQPQGPLGTDSLK	1	S(1): 0.0; S(3): 100.0; T(16): 0.0; S(18): 0.0	381	Q05469	Hormone-sensitive lipase OS=Homo sapiens GN=LIPE PE=1 SV=4 - [LIPS_HUMAN]	1	Q05469	S855	Hormone-sensitive lipase (HSL) (EC 3.1.1.79)	LIPE																					Reverse	Class I	sVsEAALAQPQGPLGTDSLk	1	N-Term(Dimethyl:2H(4)); S3(Phospho); K20(Dimethyl:2H(4))	57	HCD	13	0	2113.1	2	1057.05	-0.96	136.38	10979	20110114_LM_HJ_Epac_Rev_007_F13.raw
LTFDSSFpSPNTGK	1	T(2): 0.0; S(5): 0.0; S(6): 0.0; S(8): 100.0; T(11): 0.0	381	P21796	Voltage-dependent anion-selective channel protein 1 OS=Homo sapiens GN=VDAC1 PE=1 SV=2 - [VDAC1_HUMAN]	1	P21796	S104	Voltage-dependent anion-selective channel protein 1 (VDAC-1) (hVDAC1) (Outer mitochondrial membrane protein porin 1) (Plasmalemmal porin) (Porin 31HL) (Porin 31HM)	VDAC1 VDAC																					Forward	Class I	lTFDSSFsPNTGk	1	N-Term(Dimethyl); S8(Phospho); K13(Dimethyl)	87	ETD	14	0	1536.7	3	512.904	0.31	135.02	11494	OR5_101215_LM_HJ_Epac1_007_SCX_Phospho_F14.raw
IEpTDEEESCDNAHGDANQPAR	1	T(3): 100.0; S(8): 0.0	381	Q96T23	Remodeling and spacing factor 1 OS=Homo sapiens GN=RSF1 PE=1 SV=1 - [RSF1_HUMAN]	1	Q96T23	T1295	Remodeling and spacing factor 1 (Rsf-1) (HBV pX-associated protein 8) (Hepatitis B virus X-associated protein) (p325 subunit of RSF chromatin-remodeling complex)	RSF1 HBXAP XAP8																					Forward	Class I	iEtDEEEScDNAHGDANQPAR	1	N-Term(Dimethyl:2H(4)); T3(Phospho); C9(Carbamidomethyl)	115	HCD	27	0	2469.98	2	1235.49	1.99	37.22	2638	OR5_101217_LM_HJ_Epac1_007_SCX_Phospho_F27.raw
QEAKPQQAAGMLpSPK	1	S(13): 100.0	381	Q13428	Treacle protein OS=Homo sapiens GN=TCOF1 PE=1 SV=2 - [TCOF_HUMAN]	1	Q13428	S1257	Treacle protein (Treacher Collins syndrome protein)	TCOF1																					Reverse	Class I	qEAkPQQAAGmLsPk	1	N-Term(Dimethyl); K4(Dimethyl); M11(Oxidation); S13(Phospho); K15(Dimethyl)	74	ETD	28	0	1763.87	3	588.629	-2.62	43.59	3135	20110105_LM_HJ_Epac_Rev_007_F28_2.raw
ETVQTTQpSPTPVEK	1	T(2): 0.0; T(5): 0.0; T(6): 0.0; S(8): 100.0; T(10): 0.0	381	Q9UPN6	Putative RNA-binding protein 16 OS=Homo sapiens GN=RBM16 PE=1 SV=1 - [RBM16_HUMAN]	1	Q9UPN6	S617	Protein SCAF8 (CDC5L complex-associated protein 7) (RNA-binding motif protein 16) (SR-related and CTD-associated factor 8)	SCAF8 CCAP7 KIAA1116 RBM16																					Forward	Class I	eTVQTTQsPTPVEk	1	N-Term(Dimethyl); S8(Phospho); K14(Dimethyl)	75	ETD	14	0	1680.81	3	560.941	-0.07	48.86	4003	OR5_101215_LM_HJ_Epac1_007_SCX_Phospho_F14.raw
TApSFSESRADEVAPAK	1	T(1): 0.0; S(3): 100.0; S(5): 0.0; S(7): 0.0	381	P53396	ATP-citrate synthase OS=Homo sapiens GN=ACLY PE=1 SV=3 - [ACLY_HUMAN]	1	P53396	S455	ATP-citrate synthase (EC 2.3.3.8) (ATP-citrate (pro-S-)-lyase) (ACL) (Citrate cleavage enzyme)	ACLY																					Reverse	Class I	tAsFSESRADEVAPAk	1	N-Term(Dimethyl:2H(4)); S3(Phospho); K16(Dimethyl:2H(4))	89	ETD	28	1	1809.88	3	603.965	-3.02	66.24	4670	20110105_LM_HJ_Epac_Rev_007_F28.raw
NKPGPNIEpSGNEDDDASFK	1	S(9): 100.0; S(17): 0.0	381	O60841	Eukaryotic translation initiation factor 5B OS=Homo sapiens GN=EIF5B PE=1 SV=3 - [IF2P_HUMAN]	1	O60841	S214	Eukaryotic translation initiation factor 5B (eIF-5B) (Translation initiation factor IF-2)	EIF5B IF2 KIAA0741																					Forward	Class I	nkPGPNIEsGNEDDDASFk	1	N-Term(Dimethyl); K2(Dimethyl); S9(Phospho); K19(Dimethyl)	86	ETD	28	0	2197.97	3	733.327	1.28	74.38	5233	OR5_101221_LM_HJ_Epac1_007_SCX_Phospho_F28.raw
GKDSLpSDDGVDLK	1	S(4): 0.0; S(6): 100.0	381	P07948	Tyrosine-protein kinase Lyn OS=Homo sapiens GN=LYN PE=1 SV=3 - [LYN_HUMAN]	1	P07948	S13	Tyrosine-protein kinase Lyn (EC 2.7.10.2) (Lck/Yes-related novel protein tyrosine kinase) (V-yes-1 Yamaguchi sarcoma viral related oncogene homolog) (p53Lyn) (p56Lyn)	LYN JTK8																					Forward	Class I	gkDSLsDDGVDLk	1	N-Term(Dimethyl); K2(Dimethyl); S6(Phospho); K13(Dimethyl)	84	ETD	28	1	1512.72	3	504.912	1.53	84.61	5897	OR5_101221_LM_HJ_Epac1_007_SCX_Phospho_F28.raw
LCAGIMITApSHNPK	1	T(8): 0.0; S(10): 100.0	381	Q96G03	Phosphoglucomutase-2 OS=Homo sapiens GN=PGM2 PE=1 SV=4 - [PGM2_HUMAN]	1	Q96G03	S165	Phosphoglucomutase-2 (PGM 2) (EC 5.4.2.2) (Glucose phosphomutase 2) (Phosphodeoxyribomutase) (Phosphopentomutase) (EC 5.4.2.7)	PGM2 MSTP006																					Reverse	Class I	lcAGImITAsHNPk	1	N-Term(Dimethyl:2H(4)); C2(Carbamidomethyl); M6(Oxidation); S10(Phospho); K14(Dimethyl:2H(4))	80	ETD	28	0	1672.84	3	558.284	-2.24	88.22	6031	20110105_LM_HJ_Epac_Rev_007_F28_2.raw
ISKLEVTEIVKPpSPK	1	S(2): 0.0; T(7): 0.0; S(13): 100.0	381	Q7Z6E9	Retinoblastoma-binding protein 6 OS=Homo sapiens GN=RBBP6 PE=1 SV=1 - [RBBP6_HUMAN]	1	Q7Z6E9	S1179	E3 ubiquitin-protein ligase RBBP6 (EC 6.3.2.-) (Proliferation potential-related protein) (Protein P2P-R) (Retinoblastoma-binding Q protein 1) (RBQ-1) (Retinoblastoma-binding protein 6) (p53-associated cellular protein of testis)	RBBP6 P2PR PACT RBQ1 My038																					Reverse	Class I	iSkLEVTEIVkPsPk	1	N-Term(Dimethyl:2H(4)); K3(Dimethyl:2H(4)); K11(Dimethyl:2H(4)); S13(Phospho); K15(Dimethyl:2H(4))	68	ETD	31	1	1876.18	3	626.066	-1.62	108.55	6278	20110105_LM_HJ_Epac_Rev_007_F31_2.raw
LEAVTARpSFEEEGEHLGSR	1	T(5): 0.0; S(8): 100.0; S(18): 0.0	381	Q9BXW6	Oxysterol-binding protein-related protein 1 OS=Homo sapiens GN=OSBPL1A PE=1 SV=2 - [OSBL1_HUMAN]	1	Q9BXW6	S499	Oxysterol-binding protein-related protein 1 (ORP-1) (OSBP-related protein 1)	OSBPL1A ORP1 OSBP8 OSBPL1 OSBPL1B																					Forward	Class I	lEAVTARsFEEEGEHLGSR	1	N-Term(Dimethyl:2H(4)); S8(Phospho)	84	ETD	31	1	2229.05	3	743.687	-0.55	115.86	6954	OR5_101221_LM_HJ_Epac1_007_SCX_Phospho_F31.raw
TGpSNISGASSDISLDEQYK	1	T(1): 0.1; S(3): 99.9; S(6): 0.0; S(9): 0.0; S(10): 0.0; S(13): 0.0; Y(18): 0.0	381	P22059	Oxysterol-binding protein 1 OS=Homo sapiens GN=OSBP PE=1 SV=1 - [OSBP1_HUMAN]	1	P22059	S379	Oxysterol-binding protein 1	OSBP OSBP1																					Forward	Class I	tGsNISGASSDISLDEQYk	1	N-Term(Dimethyl); S3(Phospho); K19(Dimethyl)	144	ETD	13	0	2107.94	3	703.32	0.74	111.3	7628	OR5_101216_LM_HJ_Epac1_007_SCX_Phospho_F13.raw
IFFDpTDDDDDMPHSTSR	1	T(5): 100.0; S(14): 0.0; T(15): 0.0; S(16): 0.0	381	Q8NG27	E3 ubiquitin-protein ligase Praja1 OS=Homo sapiens GN=PJA1 PE=1 SV=2 - [PJA1_HUMAN]	1	Q8NG27	T277	E3 ubiquitin-protein ligase Praja-1 (Praja1) (EC 6.3.2.-) (RING finger protein 70)	PJA1 RNF70																					Forward	Class I	iFFDtDDDDDMPHSTSR	1	N-Term(Dimethyl:2H(4)); T5(Phospho)	98	ETD	27	0	2125.83	3	709.283	-0.92	120.71	7843	OR5_101221_LM_HJ_Epac1_007_SCX_Phospho_F27.raw
GESApSPANEEITEEQNGTANGFSEINSK	1	S(3): 0.0; S(5): 100.0; T(12): 0.0; T(18): 0.0; S(23): 0.0; S(27): 0.0	381	Q15022	Polycomb protein SUZ12 OS=Homo sapiens GN=SUZ12 PE=1 SV=3 - [SUZ12_HUMAN]	1	Q15022	S695	Polycomb protein SUZ12 (Chromatin precipitated E2F target 9 protein) (ChET 9 protein) (Joined to JAZF1 protein) (Suppressor of zeste 12 protein homolog)	SUZ12 CHET9 JJAZ1 KIAA0160																					Forward	Class I	gESAsPANEEITEEQNGTANGFSEINSk	1	N-Term(Dimethyl); S5(Phospho); K28(Dimethyl)	74	HCD	13	0	3046.31	3	1016.11	-2.49	115.21	8119	OR5_101221_LM_HJ_Epac1_007_SCX_Phospho_F13.raw
VSNQDSKpSPLGFYCDQNPVESSMCQSNSR	1	S(2): 0.0; S(6): 0.7; S(8): 99.3; Y(13): 0.0; S(21): 0.0; S(22): 0.0; S(26): 0.0; S(28): 0.0	381	Q9Y6Q9	Nuclear receptor coactivator 3 OS=Homo sapiens GN=NCOA3 PE=1 SV=1 - [NCOA3_HUMAN]	1	Q9Y6Q9	S569	Nuclear receptor coactivator 3 (NCoA-3) (EC 2.3.1.48) (ACTR) (Amplified in breast cancer 1 protein) (AIB-1) (CBP-interacting protein) (pCIP) (Class E basic helix-loop-helix protein 42) (bHLHe42) (Receptor-associated coactivator 3) (RAC-3) (Steroid receptor coactivator protein 3) (SRC-3) (Thyroid hormone receptor activator molecule 1) (TRAM-1)	NCOA3 AIB1 BHLHE42 RAC3 TRAM1																					Forward	Class I	vSNQDSksPLGFYcDQNPVESSMcQSNSR	1	N-Term(Dimethyl); K7(Dimethyl); S8(Phospho); C14(Carbamidomethyl); C24(Carbamidomethyl)	73	HCD	27	1	3457.44	3	1153.15	-1.63	130.51	8464	OR5_101221_LM_HJ_Epac1_007_SCX_Phospho_F27.raw
LSAFRPWpSPAVSASEK	1	S(2): 0.0; S(8): 100.0; S(12): 0.0; S(14): 0.0	381	P12755	Ski oncogene OS=Homo sapiens GN=SKI PE=1 SV=1 - [SKI_HUMAN]	1	P12755	S383	Ski oncogene (Proto-oncogene c-Ski)	SKI																					Reverse	Class I	lSAFRPWsPAVSASEk	1	N-Term(Dimethyl:2H(4)); S8(Phospho); K16(Dimethyl:2H(4))	71	ETD	28	0	1876.97	3	626.328	-5.82	134.32	8556	20110105_LM_HJ_Epac_Rev_007_F28.raw
VQGEAVSNIQENTQTPTVQEEpSEEEEVDETGVEVK	1	S(7): 0.0; T(13): 0.0; T(15): 0.0; T(17): 0.0; S(22): 100.0; T(30): 0.0	381	Q13765	Nascent polypeptide-associated complex subunit alpha OS=Homo sapiens GN=NACA PE=1 SV=1 - [NACA_HUMAN]	1	Q13765	S166	Nascent polypeptide-associated complex subunit alpha (NAC-alpha) (Alpha-NAC) (allergen Hom s 2)	NACA HSD48																					Reverse	Class I	vQGEAVSNIQENTQTPTVQEEsEEEEVDETGVEVk	1	N-Term(Dimethyl); S22(Phospho); K35(Dimethyl)	80	HCD	13	0	3996.79	3	1332.93	-1.98	118.16	8664	20110105_LM_HJ_Epac_Rev_007_F13.raw
TSpSIADEGTYTLDSILR	1	T(1): 0.0; S(2): 0.0; S(3): 100.0; T(9): 0.0; Y(10): 0.0; T(11): 0.0; S(14): 0.0	380	Q9Y4I1	Myosin-Va OS=Homo sapiens GN=MYO5A PE=1 SV=1 - [MYO5A_HUMAN]	1	Q9Y4I1	S1652	Unconventional myosin-Va (Dilute myosin heavy chain, non-muscle) (Myosin heavy chain 12) (Myosin-12) (Myoxin)	MYO5A MYH12																					Forward	Class I	tSsIADEGTYTLDSILR	1	N-Term(Dimethyl:2H(4)); S3(Phospho)	89	ETD	13	0	1953.94	3	651.984	1.19	148.6	10162	OR5_101216_LM_HJ_Epac1_007_SCX_Phospho_F13.raw
QVQpSLTCEVDALK	1	S(4): 100.0; T(6): 0.0	380	P08670	Vimentin OS=Homo sapiens GN=VIM PE=1 SV=4 - [VIME_HUMAN]	1	P08670	S325	Vimentin	VIM																					Reverse	Class I	qVQsLTcEVDALk	1	N-Term(Dimethyl:2H(4)); S4(Phospho); C7(Carbamidomethyl); K13(Dimethyl:2H(4))	72	ETD	14	0	1634.83	3	545.616	0.68	136.14	10278	20110105_LM_HJ_Epac_Rev_007_F14.raw
SNpSLSEQLAINTSPDAVK	1	S(1): 0.0; S(3): 100.0; S(5): 0.0; T(12): 0.0; S(13): 0.0	380	Q5T1M5	FK506-binding protein 15 OS=Homo sapiens GN=FKBP15 PE=1 SV=2 - [FKB15_HUMAN]	1	Q5T1M5	S346	FK506-binding protein 15 (FKBP-15) (133 kDa FK506-binding protein) (133 kDa FKBP) (FKBP-133) (WASP and FKBP-like) (WAFL)	FKBP15 KIAA0674																					Reverse	Class I	sNSLSEQLAINTSPDAVk	1	N-Term(Dimethyl:2H(4)); S1(Phospho); K18(Dimethyl:2H(4))	91	HCD	13	0	2018.03	2	1009.52	1.73	129.27	10390	20110114_LM_HJ_Epac_Rev_007_F13.raw
GIQYIDLSSDpSEDVVSPNCSNTVQEK	1	Y(4): 0.0; S(8): 0.0; S(9): 0.6; S(11): 99.4; S(16): 0.0; S(20): 0.0; T(22): 0.0	380	Q9H4L7	SWI/SNF-related matrix-associated actin-dependent regulator of chromatin subfamily A containing DEAD/H box 1 OS=Homo sapiens GN=SMARCAD1 PE=1 SV=1 - [SMRCD_HUMAN]	1	Q9H4L7	S98	SWI/SNF-related matrix-associated actin-dependent regulator of chromatin subfamily A containing DEAD/H box 1 (EC 3.6.4.12) (ATP-dependent helicase 1) (hHEL1)	SMARCAD1 KIAA1122																					Forward	Class I	gIQYIDLSSDsEDVVSPNcSNTVQEk	1	N-Term(Dimethyl:2H(4)); S11(Phospho); C19(Carbamidomethyl); K26(Dimethyl:2H(4))	53	HCD	14	0	3028.4	3	1010.14	1.02	142.68	12114	OR5_101215_LM_HJ_Epac1_007_SCX_Phospho_F14.raw
LFSpSLGELSSISAQR	1	S(3): 0.0; S(4): 100.0; S(9): 0.0; S(10): 0.0; S(12): 0.0	380	Q9BYB0	SH3 and multiple ankyrin repeat domains protein 3 OS=Homo sapiens GN=SHANK3 PE=1 SV=2 - [SHAN3_HUMAN]	1	Q9BYB0	S1549	SH3 and multiple ankyrin repeat domains protein 3 (Shank3) (Proline-rich synapse-associated protein 2) (ProSAP2)	SHANK3 KIAA1650 PSAP2																					Forward	Class I	lFSsLGELSSISAQR	1	N-Term(Dimethyl:2H(4)); S4(Phospho)	112	ETD	14	0	1706.87	3	569.627	0.74	151.71	12844	OR5_101215_LM_HJ_Epac1_007_SCX_Phospho_F14.raw
RTYpSDEANQMR	1	T(2): 0.0; Y(3): 0.0; S(4): 100.0	380	Q9BXF6	Rab11 family-interacting protein 5 OS=Homo sapiens GN=RAB11FIP5 PE=1 SV=1 - [RFIP5_HUMAN]	1	Q9BXF6	S307	Rab11 family-interacting protein 5 (Rab11-FIP5) (Gamma-SNAP-associated factor 1) (Gaf-1) (Phosphoprotein pp75) (Rab11-interacting protein Rip11)	RAB11FIP5 GAF1 KIAA0857 RIP11																					Reverse	Class I	rTYsDEANQMR	1	N-Term(Dimethyl); S4(Phospho)	59	ETD	29	1	1478.6	3	493.539	-4.59	45.49	2967	20110105_LM_HJ_Epac_Rev_007_F29.raw
NRpSAEEGELAESK	1	S(3): 100.0; S(12): 0.0	380	Q9C0C2	182 kDa tankyrase 1-binding protein OS=Homo sapiens GN=TNKS1BP1 PE=1 SV=3 - [TB182_HUMAN]	1	Q9C0C2	S1666	182 kDa tankyrase-1-binding protein	TNKS1BP1 KIAA1741 TAB182																					Forward	Class I	nRsAEEGELAESk	1	N-Term(Dimethyl); S3(Phospho); K13(Dimethyl)	90	ETD	29	1	1555.7	3	519.239	1.46	46.06	3466	OR5_101217_LM_HJ_Epac1_007_SCX_Phospho_F29.raw
AGGGGGLGAGpSPALSGGQGR	1	S(11): 100.0; S(15): 0.0	380	Q6IQ22	Putative Ras-related protein Rab-12 OS=Homo sapiens GN=RAB12 PE=5 SV=3 - [RAB12_HUMAN]	1	Q6IQ22	S21	Ras-related protein Rab-12	RAB12																					Reverse	Class I	aGGGGGLGAGsPALSGGQGR	1	N-Term(Dimethyl:2H(4)); S11(Phospho)	142	HCD	14	0	1695.81	2	848.407	-2.37	66.02	4936	20110105_LM_HJ_Epac_Rev_007_F14.raw
KGDDpSDEEDLCISNK	1	S(5): 100.0; S(13): 0.0	380	Q9Y3M8	StAR-related lipid transfer protein 13 OS=Homo sapiens GN=STARD13 PE=1 SV=2 - [STA13_HUMAN]	1	Q9Y3M8	S133	StAR-related lipid transfer protein 13 (46H23.2) (Deleted in liver cancer 2 protein) (DLC-2) (Rho GTPase-activating protein) (START domain-containing protein 13) (StARD13)	STARD13 DLC2 GT650																					Forward	Class I	kGDDsDEEDLcISNk	1	N-Term(Dimethyl:2H(4)); K1(Dimethyl:2H(4)); S5(Phospho); C11(Carbamidomethyl); K15(Dimethyl:2H(4))	89	ETD	28	1	1900.86	3	634.293	0.11	70.33	5105	OR5_101217_LM_HJ_Epac1_007_SCX_Phospho_F28.raw
DSQDASAEQpSDHDDEVASLASASGGFGTK	1	S(2): 0.0; S(6): 0.0; S(10): 100.0; S(18): 0.0; S(21): 0.0; S(23): 0.0; T(28): 0.0	380	Q6P2E9	Enhancer of mRNA-decapping protein 4 OS=Homo sapiens GN=EDC4 PE=1 SV=1 - [EDC4_HUMAN]	1	Q6P2E9	S879	Enhancer of mRNA-decapping protein 4 (Autoantigen Ge-1) (Autoantigen RCD-8) (Human enhancer of decapping large subunit) (Hedls)	EDC4 HEDLS																					Reverse	Class I	dSQDASAEQsDHDDEVASLASASGGFGTk	1	N-Term(Dimethyl); S10(Phospho); K29(Dimethyl)	74	HCD	18-20	0	3018.25	3	1006.76	1.85	81.69	5389	20110105_LM_HJ_Epac_Rev_007_F18_F20.raw
EAQTLDSQIQETpSI	1	T(4): 0.0; S(7): 0.0; T(12): 0.0; S(13): 100.0	380	P27816	Microtubule-associated protein 4 OS=Homo sapiens GN=MAP4 PE=1 SV=2 - [MAP4_HUMAN]	1	P27816	S1151	Microtubule-associated protein 4 (MAP-4)	MAP4																					Forward	Class I	eAQTLDSQIQETsI	1	N-Term(Dimethyl); S13(Phospho)	88	ETD	6	0	1670.75	3	557.589	0.29	76.28	5507	OR5_101217_LM_HJ_Epac1_007_SCX_Phospho_F6.raw
RNYILDQTNVYGpSAQR	1	Y(3): 0.0; T(8): 0.0; Y(11): 0.0; S(13): 100.0	380	Q9BUJ2	Heterogeneous nuclear ribonucleoprotein U-like protein 1 OS=Homo sapiens GN=HNRNPUL1 PE=1 SV=2 - [HNRL1_HUMAN]	1	Q9BUJ2	S512	Heterogeneous nuclear ribonucleoprotein U-like protein 1 (Adenovirus early region 1B-associated protein 5) (E1B-55 kDa-associated protein 5) (E1B-AP5)	HNRNPUL1 E1BAP5 HNRPUL1																					Forward	Class I	rNYILDQTNVYGsAQR	1	N-Term(Dimethyl); S13(Phospho)	91	ETD	30	1	2005.95	3	669.321	-0.66	105.26	6986	OR5_101221_LM_HJ_Epac1_007_SCX_Phospho_F30.raw
DALGDSLQVPVpSPSSTTSSR	1	S(6): 0.0; S(12): 100.0; S(14): 0.0; S(15): 0.0; T(16): 0.0; T(17): 0.0; S(18): 0.0; S(19): 0.0	380	Q9Y2D5	A-kinase anchor protein 2 OS=Homo sapiens GN=AKAP2 PE=1 SV=2 - [AKAP2_HUMAN]	1	Q9Y2D5	S152	A-kinase anchor protein 2 (AKAP-2) (AKAP-KL) (Protein kinase A-anchoring protein 2) (PRKA2)	AKAP2 KIAA0920 PRKA2																					Forward	Class I	dALGDSLQVPVsPSSTTSSR	2	N-Term(Dimethyl:2H(4)); S12(Phospho)	105	ETD	13	0	2116.01	3	706.008	0.03	122.53	8358	OR5_101216_LM_HJ_Epac1_007_SCX_Phospho_F13.raw
FSGWYDADLpSPAGHEEAK	1	S(2): 0.0; Y(5): 0.0; S(10): 100.0	380	P18669	Phosphoglycerate mutase 1 OS=Homo sapiens GN=PGAM1 PE=1 SV=2 - [PGAM1_HUMAN]	1	P18669	S31	Phosphoglycerate mutase 1 (EC 3.1.3.13) (EC 5.4.2.1) (EC 5.4.2.4) (BPG-dependent PGAM 1) (Phosphoglycerate mutase isozyme B) (PGAM-B)	PGAM1 PGAMA CDABP0006																					Forward	Class I	fSGWYDADLsPAGHEEAk	1	N-Term(Dimethyl); S10(Phospho); K18(Dimethyl)	84	ETD	28	0	2115.91	3	705.974	0.24	133.72	9079	OR5_101221_LM_HJ_Epac1_007_SCX_Phospho_F28.raw
IRFNpSISCSDPLVSSWR	1	S(5): 100.0; S(7): 0.0; S(9): 0.0; S(14): 0.0; S(15): 0.0	380	P29474	Nitric oxide synthase, endothelial OS=Homo sapiens GN=NOS3 PE=1 SV=3 - [NOS3_HUMAN]	1	P29474	S615	Nitric oxide synthase, endothelial (EC 1.14.13.39) (Constitutive NOS) (cNOS) (EC-NOS) (Endothelial NOS) (eNOS) (NOS type III) (NOSIII)	NOS3																					Forward	Class I	iRFNsIScSDPLVSSWR	1	N-Term(Dimethyl:2H(4)); S5(Phospho); C8(Carbamidomethyl)	118	ETD	29	1	2136.03	3	712.681	1.22	143.76	9335	OR5_101221_LM_HJ_Epac1_007_SCX_Phospho_F29.raw
NWTEDMEGGISpSPVK	1	T(3): 0.0; S(11): 0.0; S(12): 100.0	380	P08651	Nuclear factor 1 C-type OS=Homo sapiens GN=NFIC PE=1 SV=2 - [NFIC_HUMAN]	1	P08651	S323	Nuclear factor 1 C-type (NF1-C) (Nuclear factor 1/C) (CCAAT-box-binding transcription factor) (CTF) (Nuclear factor I/C) (NF-I/C) (NFI-C) (TGGCA-binding protein)	NFIC NFI																					Reverse	Class I	nWTEDMEGGISsPVk	1	N-Term(Dimethyl); S12(Phospho); K15(Dimethyl)	76	ETD	14	0	1785.78	3	595.931	0.58	128.01	9645	20110105_LM_HJ_Epac_Rev_007_F14.raw
ERPIpSLGIFPLPAGDGLLTPDAQK	1	S(5): 100.0; T(19): 0.0	379	O60271	C-jun-amino-terminal kinase-interacting protein 4 OS=Homo sapiens GN=SPAG9 PE=1 SV=4 - [JIP4_HUMAN]	1	O60271	S203	C-Jun-amino-terminal kinase-interacting protein 4 (JIP-4) (JNK-interacting protein 4) (Cancer/testis antigen 89) (CT89) (Human lung cancer oncogene 6 protein) (HLC-6) (JNK-associated leucine-zipper protein) (JLP) (Mitogen-activated protein kinase 8-interacting protein 4) (Proliferation-inducing protein 6) (Protein highly expressed in testis) (PHET) (Sperm surface protein) (Sperm-associated antige…	SPAG9 HSS KIAA0516 MAPK8IP4 SYD1 HLC6																					Reverse	Class I	eRPIsLGIFPLPAGDGLLTPDAQk	1	N-Term(Dimethyl); S5(Phospho); K24(Dimethyl)	47	HCD	27	0	2641.4	3	881.139	1.02	149.74	10256	20110105_LM_HJ_Epac_Rev_007_F27_2.raw
ESpSPLYSPTFSDSTSAVK	1	S(2): 0.0; S(3): 100.0; Y(6): 0.0; S(7): 0.0; T(9): 0.0; S(11): 0.0; S(13): 0.0; T(14): 0.0; S(15): 0.0	379	P46821	Microtubule-associated protein 1B OS=Homo sapiens GN=MAP1B PE=1 SV=1 - [MAP1B_HUMAN]	1	P46821	S1793	Microtubule-associated protein 1B (MAP-1B) [Cleaved into: MAP1 light chain LC1]	MAP1B																					Forward	Class I	eSsPLYSPTFSDSTSAVk	1	N-Term(Dimethyl:2H(4)); S3(Phospho); K18(Dimethyl:2H(4))	88	HCD	14	0	2046.98	2	1023.99	0.03	120.2	10317	OR5_101215_LM_HJ_Epac1_007_SCX_Phospho_F14.raw
GAKApSPVAVGSSGAGADPSFQPVLSAR	1	S(5): 100.0; S(11): 0.0; S(12): 0.0; S(19): 0.0; S(25): 0.0	379	Q5TGY3	A.T hook DNA-binding motif-containing protein 1 OS=Homo sapiens GN=AHDC1 PE=1 SV=1 - [AHDC1_HUMAN]	1	Q5TGY3	S896	AT-hook DNA-binding motif-containing protein 1	AHDC1																					Reverse	Class I	gAkAsPVAVGSSGAGADPSFQPVLSAR	1	N-Term(Dimethyl); K3(Dimethyl); S5(Phospho)	77	HCD	27	1	2620.35	3	874.122	14.68	135.84	11286	20110114_LM_HJ_Epac_Rev_007_F27_2.raw
ASMSEFLEpSEDGEVEQQR	1	S(2): 0.0; S(4): 0.0; S(9): 100.0	379	Q15022	Polycomb protein SUZ12 OS=Homo sapiens GN=SUZ12 PE=1 SV=3 - [SUZ12_HUMAN]	1	Q15022	S546	Polycomb protein SUZ12 (Chromatin precipitated E2F target 9 protein) (ChET 9 protein) (Joined to JAZF1 protein) (Suppressor of zeste 12 protein homolog)	SUZ12 CHET9 JJAZ1 KIAA0160																					Forward	Class I	aSMSEFLEsEDGEVEQQR	1	N-Term(Dimethyl:2H(4)); S9(Phospho)	95	ETD	14	0	2182.92	3	728.31	0.42	141.39	12012	OR5_101215_LM_HJ_Epac1_007_SCX_Phospho_F14.raw
EAEEGPTGASESQDpSPRK	1	T(7): 0.0; S(10): 0.0; S(12): 0.0; S(15): 100.0	379	Q5TCZ1	SH3 and PX domain-containing protein 2A OS=Homo sapiens GN=SH3PXD2A PE=1 SV=1 - [SPD2A_HUMAN]	1	Q5TCZ1	S547	SH3 and PX domain-containing protein 2A (Adapter protein TKS5) (Five SH3 domain-containing protein) (SH3 multiple domains protein 1) (Tyrosine kinase substrate with five SH3 domains)	SH3PXD2A FISH KIAA0418 SH3MD1 TKS5																					Forward	Class I	eAEEGPTGASESQDsPRk	1	N-Term(Dimethyl); S15(Phospho); K18(Dimethyl)	75	ETD	27	1	2010.86	3	670.959	-0.8	31.45	2253	OR5_101221_LM_HJ_Epac1_007_SCX_Phospho_F27.raw
GGPGAAPGGASPASSSSAASpSPSSGR	1	S(11): 0.0; S(14): 0.0; S(15): 0.0; S(16): 0.0; S(17): 0.0; S(20): 0.0; S(21): 100.0; S(23): 0.0; S(24): 0.0	379	Q9BXK1	Krueppel-like factor 16 OS=Homo sapiens GN=KLF16 PE=1 SV=1 - [KLF16_HUMAN]	1	Q9BXK1	S109	Krueppel-like factor 16 (Basic transcription element-binding protein 4) (BTE-binding protein 4) (Novel Sp1-like zinc finger transcription factor 2) (Transcription factor BTEB4) (Transcription factor NSLP2)	KLF16 BTEB4 NSLP2																					Forward	Class I	gGPGAAPGGASPASSSSAASsPSSGR	1	N-Term(Dimethyl:2H(4)); S21(Phospho)	96	ETD	14	0	2226.99	3	743.003	0.66	39.97	2870	OR5_101221_LM_HJ_Epac1_007_SCX_Phospho_F14.raw
SSLGQpSASETEEDTVSVSKK	1	S(1): 0.0; S(2): 0.0; S(6): 100.0; S(8): 0.0; T(10): 0.0; T(14): 0.0; S(16): 0.0; S(18): 0.0	379	Q13435	Splicing factor 3B subunit 2 OS=Homo sapiens GN=SF3B2 PE=1 SV=1 - [SF3B2_HUMAN]	1	Q13435	S284	Splicing factor 3B subunit 2 (Pre-mRNA-splicing factor SF3b 145 kDa subunit) (SF3b145) (SF3b150) (Spliceosome-associated protein 145) (SAP 145)	SF3B2 SAP145																					Forward	Class I	sSLGQsASETEEDTVSVSkk	1	N-Term(Dimethyl:2H(4)); S6(Phospho); K19(Dimethyl:2H(4)); K20(Dimethyl:2H(4))	84	ETD	27	1	2245.12	3	749.046	-0.74	74.81	5011	OR5_101217_LM_HJ_Epac1_007_SCX_Phospho_F27.raw
TpSPGRVDLPGSSTTLTK	1	T(1): 0.1; S(2): 99.9; S(11): 0.0; S(12): 0.0; T(13): 0.0; T(14): 0.0; T(16): 0.0	379	O94875	Sorbin and SH3 domain-containing protein 2 OS=Homo sapiens GN=SORBS2 PE=1 SV=3 - [SRBS2_HUMAN]	1	O94875	S278	Sorbin and SH3 domain-containing protein 2 (Arg/Abl-interacting protein 2) (ArgBP2) (Sorbin)	SORBS2 ARGBP2 KIAA0777																					Forward	Class I	tsPGRVDLPGSSTTLTk	1	N-Term(Dimethyl); S2(Phospho); K17(Dimethyl)	90	ETD	27	1	1852.94	3	618.319	0.18	97.28	6336	OR5_101221_LM_HJ_Epac1_007_SCX_Phospho_F27.raw
ALpSDREEEEEDDEEEEEEVEAAAQR	1	S(3): 100.0	379	Q8N3E9	1-phosphatidylinositol-4,5-bisphosphate phosphodiesterase delta-3 OS=Homo sapiens GN=PLCD3 PE=1 SV=3 - [PLCD3_HUMAN]	1	Q8N3E9	S496	1-phosphatidylinositol 4,5-bisphosphate phosphodiesterase delta-3 (EC 3.1.4.11) (Phosphoinositide phospholipase C-delta-3) (Phospholipase C-delta-3) (PLC-delta-3)	PLCD3 KIAA1964																					Forward	Class I	aLsDREEEEEDDEEEEEEVEAAAQR	1	N-Term(Dimethyl:2H(4)); S3(Phospho)	66	HCD	26	1	3048.22	3	1016.74	-3.12	115.19	8109	OR5_101217_LM_HJ_Epac1_007_SCX_Phospho_F26.raw
NVPQEESLEDpSDVDADFK	1	S(7): 0.0; S(11): 100.0	379	O00505	Importin subunit alpha-3 OS=Homo sapiens GN=KPNA3 PE=1 SV=2 - [IMA3_HUMAN]	1	O00505	S60	Importin subunit alpha-3 (Importin alpha Q2) (Qip2) (Karyopherin subunit alpha-3) (SRP1-gamma)	KPNA3 QIP2																					Reverse	Class I	nVPQEESLEDsDVDADFk	1	N-Term(Dimethyl:2H(4)); S11(Phospho); K18(Dimethyl:2H(4))	81	ETD	13	0	2180.97	3	727.662	-0.18	123.09	9001	20110105_LM_HJ_Epac_Rev_007_F13.raw
ApSPVAVGSSGAGADPSFQPVLSAR	1	S(2): 100.0; S(8): 0.0; S(9): 0.0; S(16): 0.0; S(22): 0.0	379	Q5TGY3	A.T hook DNA-binding motif-containing protein 1 OS=Homo sapiens GN=AHDC1 PE=1 SV=1 - [AHDC1_HUMAN]	1	Q5TGY3	S896	AT-hook DNA-binding motif-containing protein 1	AHDC1																					Reverse	Class I	asPVAVGSSGAGADPSFQPVLSAR	1	N-Term(Dimethyl:2H(4)); S2(Phospho)	42	HCD	13	0	2340.15	3	780.723	0.38	131.97	9611	20110105_LM_HJ_Epac_Rev_007_F13.raw
RRpSEVVESTTESQDK	1	S(3): 100.0; S(8): 0.0; T(9): 0.0; T(10): 0.0; S(12): 0.0	378	Q5UIP0	Telomere-associated protein RIF1 OS=Homo sapiens GN=RIF1 PE=1 SV=2 - [RIF1_HUMAN]	1	Q5UIP0	S1422	Telomere-associated protein RIF1 (Rap1-interacting factor 1 homolog)	RIF1																					Forward	Class I	rRsEVVESTTESQDk	1	N-Term(Dimethyl:2H(4)); S3(Phospho); K15(Dimethyl:2H(4))	117	ETD	33	2	1894.94	3	632.317	0.17	30.94	2343	OR5_101221_LM_HJ_Epac1_007_SCX_Phospho_F33.raw
THTTALAGRpSPpSPASGR	2	T(1): 0.0; T(3): 0.0; T(4): 0.0; S(10): 100.0; S(12): 100.0; S(15): 0.0	378	Q9UQ35	Serine/arginine repetitive matrix protein 2 OS=Homo sapiens GN=SRRM2 PE=1 SV=2 - [SRRM2_HUMAN]	1	Q9UQ35	S295, S297	Serine/arginine repetitive matrix protein 2 (300 kDa nuclear matrix antigen) (Serine/arginine-rich splicing factor-related nuclear matrix protein of 300 kDa) (SR-related nuclear matrix protein of 300 kDa) (Ser/Arg-related nuclear matrix protein of 300 kDa) (Splicing coactivator subunit SRm300) (Tax-responsive enhancer element-binding protein 803) (TaxREB803)	SRRM2 KIAA0324 SRL300 SRM300 HSPC075																					Reverse	Class I	tHTTALAGRsPsPASGR	1	N-Term(Dimethyl); S10(Phospho); S12(Phospho)	90	ETD	30	1	1854.82	3	618.946	-1.3	37.62	2639	20110105_LM_HJ_Epac_Rev_007_F30_2.raw
EVDATpSPAPpSTSSTVK	2	T(5): 2.7; S(6): 97.3; S(10): 100.0; T(11): 0.0; S(12): 0.0; S(13): 0.0; T(14): 0.0	378	Q16666	Gamma-interferon-inducible protein Ifi-16 OS=Homo sapiens GN=IFI16 PE=1 SV=3 - [IF16_HUMAN]	1	Q16666	S106, S110	Gamma-interferon-inducible protein 16 (Ifi-16) (Interferon-inducible myeloid differentiation transcriptional activator)	IFI16 IFNGIP1																					Reverse	Class I	eVDATsPAPsTSSTVk	1	N-Term(Dimethyl:2H(4)); S6(Phospho); S10(Phospho); K16(Dimethyl:2H(4))	85	ETD	7	0	1800.82	3	600.943	0.05	37.95	2732	20110105_LM_HJ_Epac_Rev_007_F7.raw
KKPSpSEERETEISLK	1	S(4): 0.0; S(5): 100.0; T(10): 0.0; S(13): 0.0	378	O75475	PC4 and SFRS1-interacting protein OS=Homo sapiens GN=PSIP1 PE=1 SV=1 - [PSIP1_HUMAN]	1	O75475	S514	PC4 and SFRS1-interacting protein (CLL-associated antigen KW-7) (Dense fine speckles 70 kDa protein) (DFS 70) (Lens epithelium-derived growth factor) (Transcriptional coactivator p75/p52)	PSIP1 DFS70 LEDGF PSIP2																					Reverse	Class I	kkPSsEERETEISLk	1	K1(Dimethyl); N-Term(Dimethyl); K2(Dimethyl); S5(Phospho); K15(Dimethyl)	85	ETD	36	2	1953.03	3	651.681	-1.46	45.66	2976	20110105_LM_HJ_Epac_Rev_007_F36.raw
GKGGVTGSPEASISGpSKGDLK	1	T(6): 0.0; S(8): 0.0; S(12): 0.0; S(14): 0.0; S(16): 100.0	378	Q09666	Neuroblast differentiation-associated protein AHNAK OS=Homo sapiens GN=AHNAK PE=1 SV=2 - [AHNK_HUMAN]	1	Q09666	S5739	Neuroblast differentiation-associated protein AHNAK (Desmoyokin)	AHNAK PM227																					Reverse	Class I	gkGGVTGSPEASISGskGDLk	1	N-Term(Dimethyl); K2(Dimethyl); S16(Phospho); K17(Dimethyl); K21(Dimethyl)	83	ETD	31	2	2124.09	3	708.702	-0.99	62.65	3921	20110105_LM_HJ_Epac_Rev_007_F31_2.raw
RNpSLTGEEGQLAR	1	S(3): 100.0; T(5): 0.0	378	Q9BX95	Sphingosine-1-phosphate phosphatase 1 OS=Homo sapiens GN=SGPP1 PE=1 SV=2 - [SGPP1_HUMAN]	1	Q9BX95	S112	Sphingosine-1-phosphate phosphatase 1 (SPPase1) (Spp1) (hSPP1) (hSPPase1) (EC 3.1.3.-) (Sphingosine-1-phosphatase 1)	SGPP1																					Forward	Class I	rNsLTGEEGQLAR	1	N-Term(Dimethyl:2H(4)); S3(Phospho)	65	ETD	29	1	1542.76	3	514.924	0.86	67.47	4819	OR5_101221_LM_HJ_Epac1_007_SCX_Phospho_F29.raw
GGVTGSPEASISGpSKGDLK	1	T(4): 0.0; S(6): 0.0; S(10): 0.0; S(12): 0.0; S(14): 100.0	378	Q09666	Neuroblast differentiation-associated protein AHNAK OS=Homo sapiens GN=AHNAK PE=1 SV=2 - [AHNK_HUMAN]	1	Q09666	S5739	Neuroblast differentiation-associated protein AHNAK (Desmoyokin)	AHNAK PM227																					Forward	Class I	gGVTGSPEASISGskGDLk	1	N-Term(Dimethyl:2H(4)); S14(Phospho); K15(Dimethyl:2H(4)); K19(Dimethyl:2H(4))	86	ETD	27	1	1923.02	3	641.679	0.58	75.83	4972	OR5_101221_LM_HJ_Epac1_007_SCX_Phospho_F27.raw
QNpSLHGSFHSADVLK	1	S(3): 100.0; S(7): 0.0; S(10): 0.0	378	Q9NSY1	BMP-2-inducible protein kinase OS=Homo sapiens GN=BMP2K PE=1 SV=2 - [BMP2K_HUMAN]	1	Q9NSY1	S1107	BMP-2-inducible protein kinase (BIKe) (EC 2.7.11.1)	BMP2K BIKE HRIHFB2017																					Reverse	Class I	qNsLHGSFHSADVLk	1	N-Term(Dimethyl); S3(Phospho); K15(Dimethyl)	89	ETD	31	0	1775.85	3	592.62	-1.37	85.26	5098	20110105_LM_HJ_Epac_Rev_007_F31_2.raw
KFLEESVSMpSPEER	1	S(6): 0.0; S(8): 0.0; S(10): 100.0	378	P15374	Ubiquitin carboxyl-terminal hydrolase isozyme L3 OS=Homo sapiens GN=UCHL3 PE=1 SV=1 - [UCHL3_HUMAN]	1	P15374	S130	Ubiquitin carboxyl-terminal hydrolase isozyme L3 (UCH-L3) (EC 3.4.19.12) (Ubiquitin thioesterase L3)	UCHL3																					Reverse	Class I	kFLEESVSmsPEER	1	K1(Dimethyl); N-Term(Dimethyl); M9(Oxidation); S10(Phospho)	79	ETD	29	1	1819.82	3	607.277	-0.94	77.19	5352	20110105_LM_HJ_Epac_Rev_007_F29_2.raw
RKPpSVPDSASPADDSFVDPGER	1	S(4): 100.0; S(8): 0.0; S(10): 0.0; S(15): 0.0	378	P16333	Cytoplasmic protein NCK1 OS=Homo sapiens GN=NCK1 PE=1 SV=1 - [NCK1_HUMAN]	1	P16333	S85	Cytoplasmic protein NCK1 (NCK adaptor protein 1) (Nck-1) (SH2/SH3 adaptor protein NCK-alpha)	NCK1 NCK																					Reverse	Class I	rkPsVPDSASPADDSFVDPGER	1	N-Term(Dimethyl); K2(Dimethyl); S4(Phospho)	83	HCD	32	1	2465.14	3	822.383	0.4	87.97	5384	20110105_LM_HJ_Epac_Rev_007_F32.raw
LPDpSDDDEDEETAIQR	1	S(4): 100.0; T(12): 0.0	378	Q96K21	Zinc finger FYVE domain-containing protein 19 OS=Homo sapiens GN=ZFYVE19 PE=1 SV=2 - [ZFY19_HUMAN]	1	Q96K21	S354	Zinc finger FYVE domain-containing protein 19 (MLL partner containing FYVE domain)	ZFYVE19 MPFYVE																					Reverse	Class I	lPDsDDDEDEETAIQR	1	N-Term(Dimethyl); S4(Phospho)	85	ETD	13	0	1955.77	3	652.596	-0.46	76.93	5663	20110105_LM_HJ_Epac_Rev_007_F13.raw
DVMSDETNNEETEpSPSQEFVNITK	1	S(4): 0.0; T(7): 0.0; T(12): 0.0; S(14): 100.0; S(16): 0.0; T(23): 0.0	378	P46821	Microtubule-associated protein 1B OS=Homo sapiens GN=MAP1B PE=1 SV=1 - [MAP1B_HUMAN]	1	P46821	S1154	Microtubule-associated protein 1B (MAP-1B) [Cleaved into: MAP1 light chain LC1]	MAP1B																					Reverse	Class I	dVmSDETNNEETEsPSQEFVNITk	1	N-Term(Dimethyl:2H(4)); M3(Oxidation); S14(Phospho); K24(Dimethyl:2H(4))	83	HCD	12	0	2903.26	3	968.426	-0.09	84.31	6480	20110105_LM_HJ_Epac_Rev_007_F12.raw
VVFENEQDNSpSLTK	1	S(10): 0.0; S(11): 100.0; T(13): 0.0	378	Q2LD37	Uncharacterized protein KIAA1109 OS=Homo sapiens GN=KIAA1109 PE=1 SV=1 - [K1109_HUMAN]	1	Q2LD37	S2755	Uncharacterized protein KIAA1109 (Fragile site-associated protein)	KIAA1109 FSA KIAA1371																					Forward	Class I	vVFENEQDNSsLTk	1	N-Term(Dimethyl); S11(Phospho); K14(Dimethyl)	88	ETD	14	0	1745.8	3	582.605	0.67	91.15	6746	OR5_101221_LM_HJ_Epac1_007_SCX_Phospho_F14.raw
SQLDDHPEpSDDEENFIDANDDEDMEK	1	S(1): 0.0; S(9): 100.0	378	Q03701	CCAAT/enhancer-binding protein zeta OS=Homo sapiens GN=CEBPZ PE=1 SV=2 - [CEBPZ_HUMAN]	1	Q03701	S629	CCAAT/enhancer-binding protein zeta (CCAAT-box-binding transcription factor) (CBF) (CCAAT-binding factor)	CEBPZ CBF2																					Reverse	Class I	sQLDDHPEsDDEENFIDANDDEDmEk	1	N-Term(Dimethyl:2H(4)); S9(Phospho); M24(Oxidation); K26(Dimethyl:2H(4))	68	HCD	26	0	3212.25	3	1071.42	0.39	108.03	7477	20110105_LM_HJ_Epac_Rev_007_F26.raw
VHVQFFDDpSPTRGWVSK	1	S(9): 100.0; T(11): 0.0; S(16): 0.0	378	P52701	DNA mismatch repair protein Msh6 OS=Homo sapiens GN=MSH6 PE=1 SV=2 - [MSH6_HUMAN]	1	P52701	S137	DNA mismatch repair protein Msh6 (hMSH6) (G/T mismatch-binding protein) (GTBP) (GTMBP) (MutS-alpha 160 kDa subunit) (p160)	MSH6 GTBP																					Forward	Class I	vHVQFFDDsPTRGWVSk	1	N-Term(Dimethyl); S9(Phospho); K17(Dimethyl)	80	ETD	32	1	2141.02	3	714.346	0.76	136.97	7625	OR5_101221_LM_HJ_Epac1_007_SCX_Phospho_F32.raw
VRVEpSGYFSLEK	1	S(5): 100.0; Y(7): 0.0; S(9): 0.0	378	Q6WCQ1	Myosin phosphatase Rho-interacting protein OS=Homo sapiens GN=MPRIP PE=1 SV=2 - [MPRIP_HUMAN]	1	Q6WCQ1	S264	Myosin phosphatase Rho-interacting protein (M-RIP) (Rho-interacting protein 3) (RIP3) (p116Rip)	MPRIP KIAA0864 MRIP RHOIP3																					Reverse	Class I	vRVEsGYFSLEk	1	N-Term(Dimethyl); S5(Phospho); K12(Dimethyl)	68	ETD	29	1	1549.76	3	517.26	-1.44	123.73	8136	20110105_LM_HJ_Epac_Rev_007_F29_2.raw
RLNNDLVGpSTENLLK	1	S(9): 99.9; T(10): 0.1	378	Q8N5G2	Macoilin OS=Homo sapiens GN=TMEM57 PE=2 SV=1 - [MACOI_HUMAN]	1	Q8N5G2	S305	Macoilin (Transmembrane protein 57)	TMEM57																					Reverse	Class I	rLNNDLVGsTENLLk	1	N-Term(Dimethyl:2H(4)); S9(Phospho); K15(Dimethyl:2H(4))	75	ETD	29	1	1830	3	610.67	-0.64	129.97	8519	20110105_LM_HJ_Epac_Rev_007_F29_2.raw
AHSLGGLDPAFTpSTEDLNCK	1	S(3): 0.0; T(12): 0.4; S(13): 99.3; T(14): 0.4	378	O60292	Signal-induced proliferation-associated 1-like protein 3 OS=Homo sapiens GN=SIPA1L3 PE=1 SV=3 - [SI1L3_HUMAN]	1	O60292	S401	Signal-induced proliferation-associated 1-like protein 3 (SIPA1-like protein 3) (SPA-1-like protein 3)	SIPA1L3 KIAA0545 SPAL3																					Forward	Class I	aHSLGGLDPAFTsTEDLNck	1	N-Term(Dimethyl:2H(4)); S13(Phospho); C19(Carbamidomethyl); K20(Dimethyl:2H(4))	78	HCD	28	0	2277.07	3	759.696	0.43	126.41	8586	OR5_101221_LM_HJ_Epac1_007_SCX_Phospho_F28.raw
HDSIPAADTFEDLpSDVEGGGSEPTQR	1	S(3): 0.0; T(9): 0.0; S(14): 100.0; S(21): 0.0; T(24): 0.0	378	O95671	N-acetylserotonin O-methyltransferase-like protein OS=Homo sapiens GN=ASMTL PE=1 SV=3 - [ASML_HUMAN]	1	O95671	S239	N-acetylserotonin O-methyltransferase-like protein (ASMTL)	ASMTL																					Forward	Class I	hDSIPAADTFEDLsDVEGGGSEPTQR	1	N-Term(Dimethyl:2H(4)); S14(Phospho)	73	HCD	28	0	2842.23	3	948.081	-2.65	134.72	9560	OR5_101217_LM_HJ_Epac1_007_SCX_Phospho_F28.raw
REEGpSDIEDEDMEELLNDTR	1	S(5): 100.0; T(19): 0.0	378	Q8NHQ9	ATP-dependent RNA helicase DDX55 OS=Homo sapiens GN=DDX55 PE=1 SV=2 - [DDX55_HUMAN]	1	Q8NHQ9	S544	ATP-dependent RNA helicase DDX55 (EC 3.6.4.13) (DEAD box protein 55)	DDX55 KIAA1595																					Forward	Class I	rEEGsDIEDEDMEELLNDTR	1	N-Term(Dimethyl:2H(4)); S5(Phospho)	59	HCD	28	1	2507.04	3	836.352	-0.72	142.74	9744	OR5_101221_LM_HJ_Epac1_007_SCX_Phospho_F28.raw
QMNMpSPPPGNAGPVIMSIEEK	1	S(5): 100.0; S(17): 0.0	377	Q86U42	Polyadenylate-binding protein 2 OS=Homo sapiens GN=PABPN1 PE=1 SV=3 - [PABP2_HUMAN]	1	Q86U42	S150	Polyadenylate-binding protein 2 (PABP-2) (Poly(A)-binding protein 2) (Nuclear poly(A)-binding protein 1) (Poly(A)-binding protein II) (PABII) (Polyadenylate-binding nuclear protein 1)	PABPN1 PAB2 PABP2																					Reverse	Class I	qMNMsPPPGNAGPVIMSIEEk	1	N-Term(Dimethyl); S5(Phospho); K21(Dimethyl)	75	HCD	14	0	2363.09	3	788.368	1.47	141.9	10762	20110105_LM_HJ_Epac_Rev_007_F14.raw
RDpSPLQGSGQQNSQAGQR	1	S(3): 100.0; S(8): 0.0; S(13): 0.0	377	O95819	Mitogen-activated protein kinase kinase kinase kinase 4 OS=Homo sapiens GN=MAP4K4 PE=1 SV=2 - [M4K4_HUMAN]	1	O95819	S639	Mitogen-activated protein kinase kinase kinase kinase 4 (EC 2.7.11.1) (HPK/GCK-like kinase HGK) (MAPK/ERK kinase kinase kinase 4) (MEK kinase kinase 4) (MEKKK 4) (Nck-interacting kinase)	MAP4K4 HGK KIAA0687 NIK																					Forward	Class I	rDsPLQGSGQQNSQAGQR	1	N-Term(Dimethyl); S3(Phospho)	101	ETD	29	1	2021.92	3	674.644	0.94	32.04	2451	OR5_101221_LM_HJ_Epac1_007_SCX_Phospho_F29.raw
RAGDLLEDpSPKRPK	1	S(9): 100.0	377	P51858	Hepatoma-derived growth factor OS=Homo sapiens GN=HDGF PE=1 SV=1 - [HDGF_HUMAN]	1	P51858	S165	Hepatoma-derived growth factor (HDGF) (High mobility group protein 1-like 2) (HMG-1L2)	HDGF HMG1L2																					Reverse	Class I	rAGDLLEDsPkRPk	1	N-Term(Dimethyl); S9(Phospho); K11(Dimethyl); K14(Dimethyl)	71	ETD	38	2	1745.93	3	582.649	0.57	41.88	2816	20110105_LM_HJ_Epac_Rev_007_F38.raw
HSGSDRSpSFSHYSGLK	1	S(2): 0.0; S(4): 0.0; S(7): 0.0; S(8): 100.0; S(10): 0.0; Y(12): 0.0; S(13): 0.0	377	Q8NC51	Plasminogen activator inhibitor 1 RNA-binding protein OS=Homo sapiens GN=SERBP1 PE=1 SV=2 - [PAIRB_HUMAN]	1	Q8NC51	S203	Plasminogen activator inhibitor 1 RNA-binding protein (PAI1 RNA-binding protein 1) (PAI-RBP1) (SERPINE1 mRNA-binding protein 1)	SERBP1 PAIRBP1 CGI-55																					Reverse	Class I	hSGSDRSsFSHYSGLk	1	N-Term(Dimethyl); S8(Phospho); K16(Dimethyl)	86	ETD	40	1	1887.84	3	629.951	-0.08	45.94	3032	20110105_LM_HJ_Epac_Rev_007_F40.raw
QGQSQAASSSSVTpSPIK	1	S(4): 0.0; S(8): 0.0; S(9): 0.0; S(10): 0.0; S(11): 0.0; T(13): 0.0; S(14): 100.0	377	O60583	Cyclin-T2 OS=Homo sapiens GN=CCNT2 PE=1 SV=2 - [CCNT2_HUMAN]	1	O60583	S480	Cyclin-T2 (CycT2)	CCNT2																					Forward	Class I	qGQSQAASSSSVTsPIk	1	N-Term(Dimethyl:2H(4)); S14(Phospho); K17(Dimethyl:2H(4))	78	ETD	14	0	1806.91	3	602.975	1.63	52.97	3815	OR5_101221_LM_HJ_Epac1_007_SCX_Phospho_F14.raw
LGHSLpSVSKDSISR	1	S(4): 0.0; S(6): 100.0; S(8): 0.0; S(11): 0.0; S(13): 0.0	377	Q9P266	Uncharacterized protein KIAA1462 OS=Homo sapiens GN=KIAA1462 PE=2 SV=3 - [K1462_HUMAN]	1	Q9P266	S1319	Junctional protein associated with coronary artery disease (JCAD)	KIAA1462 JCAD																					Reverse	Class I	lGHSLsVSkDSISR	1	N-Term(Dimethyl); S6(Phospho); K9(Dimethyl)	93	ETD	32	1	1621.83	3	541.282	0.71	67.56	4297	20110105_LM_HJ_Epac_Rev_007_F32.raw
DIKEEpSDEEEEDDEESGRLR	1	S(6): 100.0; S(16): 0.0	377	Q96EV2	RNA-binding protein 33 OS=Homo sapiens GN=RBM33 PE=1 SV=2 - [RBM33_HUMAN]	1	Q96EV2	S205	RNA-binding protein 33 (Proline-rich protein 8) (RNA-binding motif protein 33)	RBM33 PRR8																					Forward	Class I	dIkEEsDEEEEDDEESGRLR	1	N-Term(Dimethyl:2H(4)); K3(Dimethyl:2H(4)); S6(Phospho)	81	HCD	30	2	2553.1	2	1277.05	-0.47	64.25	4392	OR5_101221_LM_HJ_Epac1_007_SCX_Phospho_F30.raw
SRpSDNALHLASER	1	S(1): 0.0; S(3): 100.0; S(11): 0.0	377	Q7Z3G6	Prickle-like protein 2 OS=Homo sapiens GN=PRICKLE2 PE=1 SV=2 - [PRIC2_HUMAN]	1	Q7Z3G6	S695	Prickle-like protein 2	PRICKLE2																					Forward	Class I	sRsDNALHLASER	1	N-Term(Dimethyl); S3(Phospho)	78	ETD	33	1	1563.73	3	521.914	-0.66	70.9	4480	OR5_101217_LM_HJ_Epac1_007_SCX_Phospho_F33.raw
RKpSTLYFNTQEK	1	S(3): 100.0; T(4): 0.0; Y(6): 0.0; T(9): 0.0	377	Q92521	GPI mannosyltransferase 3 OS=Homo sapiens GN=PIGB PE=2 SV=1 - [PIGB_HUMAN]	1	Q92521	S39	GPI mannosyltransferase 3 (EC 2.4.1.-) (GPI mannosyltransferase III) (GPI-MT-III) (Phosphatidylinositol-glycan biosynthesis class B protein) (PIG-B)	PIGB																					Reverse	Class I	rksTLYFNTQEk	1	N-Term(Dimethyl); K2(Dimethyl); S3(Phospho); K12(Dimethyl)	95	ETD	33	2	1678.85	3	560.29	-1.29	73.94	4605	20110105_LM_HJ_Epac_Rev_007_F33_2.raw
SApSSDTSEELNSQDSPPK	1	S(1): 0.3; S(3): 99.7; S(4): 0.0; T(6): 0.0; S(7): 0.0; S(12): 0.0; S(15): 0.0	377	O14745	Ezrin-radixin-moesin-binding phosphoprotein 50 OS=Homo sapiens GN=SLC9A3R1 PE=1 SV=4 - [NHERF_HUMAN]	1	O14745	S290	Na(+)/H(+) exchange regulatory cofactor NHE-RF1 (NHERF-1) (Ezrin-radixin-moesin-binding phosphoprotein 50) (EBP50) (Regulatory cofactor of Na(+)/H(+) exchanger) (Sodium-hydrogen exchanger regulatory factor 1) (Solute carrier family 9 isoform A3 regulatory factor 1)	SLC9A3R1 NHERF NHERF1																					Forward	Class I	sAsSDTSEELNSQDSPPk	1	N-Term(Dimethyl:2H(4)); S3(Phospho); K18(Dimethyl:2H(4))	93	HCD	13	0	2022.9	2	1011.95	-1.42	64.56	4804	OR5_101221_LM_HJ_Epac1_007_SCX_Phospho_F13.raw
EAEEEpSpSGGEEEDEDENIEVVYSK	2	S(6): 100.0; S(7): 100.0; Y(22): 0.0; S(23): 0.0	377	P55010	Eukaryotic translation initiation factor 5 OS=Homo sapiens GN=EIF5 PE=1 SV=2 - [IF5_HUMAN]	1	P55010	S389, S390	Eukaryotic translation initiation factor 5 (eIF-5)	EIF5																					Reverse	Class I	eAEEEssGGEEEDEDENIEVVYSk	1	N-Term(Dimethyl); S6(Phospho); S7(Phospho); K24(Dimethyl)	59	HCD	7	0	2918.1	3	973.372	2.99	79.36	5489	20110105_LM_HJ_Epac_Rev_007_F7.raw
AGpSSTPGDAPPAVAEVQGR	1	S(3): 100.0; S(4): 0.0; T(5): 0.0	377	Q7Z6Z7	E3 ubiquitin-protein ligase HUWE1 OS=Homo sapiens GN=HUWE1 PE=1 SV=3 - [HUWE1_HUMAN]	1	Q7Z6Z7	S2887	E3 ubiquitin-protein ligase HUWE1 (EC 6.3.2.-) (ARF-binding protein 1) (ARF-BP1) (HECT, UBA and WWE domain-containing protein 1) (Homologous to E6AP carboxyl terminus homologous protein 9) (HectH9) (Large structure of UREB1) (LASU1) (Mcl-1 ubiquitin ligase E3) (Mule) (Upstream regulatory element-binding protein 1) (URE-B1) (URE-binding protein 1)	HUWE1 KIAA0312 KIAA1578 UREB1 HSPC272																					Forward	Class I	aGsSTPGDAPPAVAEVQGR	1	N-Term(Dimethyl); S3(Phospho)	107	HCD	13	0	1874.87	2	937.936	0.29	85.71	5991	OR5_101216_LM_HJ_Epac1_007_SCX_Phospho_F13.raw
EIEELQSQAQALpSQEGK	1	S(7): 0.0; S(13): 100.0	377	Q01082	Spectrin beta chain, brain 1 OS=Homo sapiens GN=SPTBN1 PE=1 SV=2 - [SPTB2_HUMAN]	1	Q01082	S1447	Spectrin beta chain, brain 1 (Beta-II spectrin) (Fodrin beta chain) (Spectrin, non-erythroid beta chain 1)	SPTBN1 SPTB2																					Forward	Class I	eIEELQSQAQALsQEGk	1	N-Term(Dimethyl); S13(Phospho); K17(Dimethyl)	78	ETD	14	0	2023.96	3	675.325	1.64	105.78	7798	OR5_101221_LM_HJ_Epac1_007_SCX_Phospho_F14.raw
EARNpSWDSPAFSNDVIR	1	S(5): 100.0; S(8): 0.0; S(12): 0.0	377	Q6DN90	IQ motif and SEC7 domain-containing protein 1 OS=Homo sapiens GN=IQSEC1 PE=1 SV=1 - [IQEC1_HUMAN]	1	Q6DN90	S512	IQ motif and SEC7 domain-containing protein 1 (ADP-ribosylation factors guanine nucleotide-exchange protein 100) (ADP-ribosylation factors guanine nucleotide-exchange protein 2) (Brefeldin-resistant Arf-GEF 2 protein)	IQSEC1 ARFGEP100 BRAG2 KIAA0763																					Reverse	Class I	eARNsWDSPAFSNDVIR	1	N-Term(Dimethyl:2H(4)); S5(Phospho)	77	ETD	28	1	2075.95	3	692.655	0.89	126.61	8143	20110105_LM_HJ_Epac_Rev_007_F28.raw
ASQpSRPNpSSALETLGGEK	2	S(2): 0.0; S(4): 100.0; S(8): 96.7; S(9): 3.3; T(13): 0.0	377	O94804	Serine/threonine-protein kinase 10 OS=Homo sapiens GN=STK10 PE=1 SV=1 - [STK10_HUMAN]	1	O94804	S450, S454	Serine/threonine-protein kinase 10 (EC 2.7.11.1) (Lymphocyte-oriented kinase)	STK10 LOK																					Forward	Class I	aSQsRPNsSALETLGGEk	1	N-Term(Dimethyl); S4(Phospho); S8(Phospho); K18(Dimethyl)	82	ETD	14	0	2047.91	3	683.308	-0.1	97.71	8502	OR5_101215_LM_HJ_Epac1_007_SCX_Phospho_F14.raw
SSpSQENLLDEVMK	1	S(1): 0.0; S(2): 0.0; S(3): 100.0	377	Q3V6T2	Girdin OS=Homo sapiens GN=CCDC88A PE=1 SV=2 - [GRDN_HUMAN]	1	Q3V6T2	S1702	Girdin (Akt phosphorylation enhancer) (APE) (Coiled-coil domain-containing protein 88A) (G alpha-interacting vesicle-associated protein) (GIV) (Girders of actin filament) (Hook-related protein 1) (HkRP1)	CCDC88A APE GRDN KIAA1212																					Forward	Class I	sSsQENLLDEVmk	1	N-Term(Dimethyl:2H(4)); S3(Phospho); M12(Oxidation); K13(Dimethyl:2H(4))	83	ETD	13	0	1639.77	3	547.263	0.24	126.5	8612	OR5_101216_LM_HJ_Epac1_007_SCX_Phospho_F13.raw
ERPISLGIFPLPAGDGLLpTPDAQK	1	S(5): 0.0; T(19): 100.0	377	O60271	C-jun-amino-terminal kinase-interacting protein 4 OS=Homo sapiens GN=SPAG9 PE=1 SV=4 - [JIP4_HUMAN]	1	O60271	T217	C-Jun-amino-terminal kinase-interacting protein 4 (JIP-4) (JNK-interacting protein 4) (Cancer/testis antigen 89) (CT89) (Human lung cancer oncogene 6 protein) (HLC-6) (JNK-associated leucine-zipper protein) (JLP) (Mitogen-activated protein kinase 8-interacting protein 4) (Proliferation-inducing protein 6) (Protein highly expressed in testis) (PHET) (Sperm surface protein) (Sperm-associated antige…	SPAG9 HSS KIAA0516 MAPK8IP4 SYD1 HLC6																					Reverse	Class I	eRPISLGIFPLPAGDGLLtPDAQk	1	N-Term(Dimethyl); T19(Phospho); K24(Dimethyl)	57	HCD	28	0	2641.4	3	881.139	0.54	150.36	9740	20110105_LM_HJ_Epac_Rev_007_F28_2.raw
WGPGSSVGpSLQALSSSQR	1	S(5): 0.0; S(6): 0.0; S(9): 100.0; S(14): 0.0; S(15): 0.0; S(16): 0.0	377	P48681	Nestin OS=Homo sapiens GN=NES PE=1 SV=2 - [NEST_HUMAN]	1	P48681	S1445	Nestin	NES Nbla00170																					Forward	Class I	wGPGSSVGsLQALSSSQR	1	N-Term(Dimethyl); S9(Phospho)	104	ETD	14	0	1911.9	3	637.97	0.37	136.7	9999	OR5_101221_LM_HJ_Epac1_007_SCX_Phospho_F14.raw
EPAITSQNpSPEAR	1	T(5): 0.0; S(6): 0.0; S(9): 100.0	376	P23193	Transcription elongation factor A protein 1 OS=Homo sapiens GN=TCEA1 PE=1 SV=2 - [TCEA1_HUMAN]	1	P23193	S100	Transcription elongation factor A protein 1 (Transcription elongation factor S-II protein 1) (Transcription elongation factor TFIIS.o)	TCEA1 GTF2S TFIIS																					Reverse	Class I	ePAITSQNsPEAR	1	N-Term(Dimethyl); S9(Phospho)	97	ETD	14	0	1507.68	3	503.231	0.41	43.9	3145	20110105_LM_HJ_Epac_Rev_007_F14.raw
QSVVYGGKpSpTIRDR	2	S(2): 0.0; Y(5): 0.0; S(9): 100.0; T(10): 100.0	376	Q8WWY3	U4/U6 small nuclear ribonucleoprotein Prp31 OS=Homo sapiens GN=PRPF31 PE=1 SV=2 - [PRP31_HUMAN]	1	Q8WWY3	S439, T440	U4/U6 small nuclear ribonucleoprotein Prp31 (Pre-mRNA-processing factor 31) (Serologically defined breast cancer antigen NY-BR-99) (U4/U6 snRNP 61 kDa protein) (Protein 61K) (hPrp31)	PRPF31 PRP31																					Reverse	Class I	qSVVYGGkstIRDR	1	N-Term(Dimethyl); K8(Dimethyl); S9(Phospho); T10(Phospho)	63	ETD	29	2	1781.83	3	594.614	-3.77	51.3	3310	20110105_LM_HJ_Epac_Rev_007_F29.raw
SCpSEEKIPEDGSLNTTK	1	S(1): 0.0; S(3): 100.0; S(12): 0.0; T(15): 0.0; T(16): 0.0	376	P37173	TGF-beta receptor type-2 OS=Homo sapiens GN=TGFBR2 PE=1 SV=2 - [TGFR2_HUMAN]	1	P37173	S553	TGF-beta receptor type-2 (TGFR-2) (EC 2.7.11.30) (TGF-beta type II receptor) (Transforming growth factor-beta receptor type II) (TGF-beta receptor type II) (TbetaR-II)	TGFBR2																					Reverse	Class I	scsEEkIPEDGSLNTTk	1	N-Term(Dimethyl:2H(4)); C2(Carbamidomethyl); S3(Phospho); K6(Dimethyl:2H(4)); K17(Dimethyl:2H(4))	94	ETD	27	1	2071	3	691.005	-1.72	69.91	4687	20110105_LM_HJ_Epac_Rev_007_F27.raw
RApSPNSDDTVLSPQELQK	1	S(3): 100.0; S(6): 0.0; T(9): 0.0; S(12): 0.0	376	Q9UH62	Armadillo repeat-containing X-linked protein 3 OS=Homo sapiens GN=ARMCX3 PE=1 SV=1 - [ARMX3_HUMAN]	1	Q9UH62	S110	Armadillo repeat-containing X-linked protein 3 (ARM protein lost in epithelial cancers on chromosome X 3) (Protein ALEX3)	ARMCX3 ALEX3 BM-017 UNQ2517/PRO6007																					Reverse	Class I	rAsPNSDDTVLSPQELQk	1	N-Term(Dimethyl); S3(Phospho); K18(Dimethyl)	90	ETD	28	1	2121.02	3	707.679	-0.41	94.9	6461	20110105_LM_HJ_Epac_Rev_007_F28.raw
DVMpSDETNNEETESPSQEFVNITK	1	S(4): 100.0; T(7): 0.0; T(12): 0.0; S(14): 0.0; S(16): 0.0; T(23): 0.0	376	P46821	Microtubule-associated protein 1B OS=Homo sapiens GN=MAP1B PE=1 SV=1 - [MAP1B_HUMAN]	1	P46821	S1144	Microtubule-associated protein 1B (MAP-1B) [Cleaved into: MAP1 light chain LC1]	MAP1B																					Reverse	Class I	dVmsDETNNEETESPSQEFVNITk	1	N-Term(Dimethyl); M3(Oxidation); S4(Phospho); K24(Dimethyl)	61	HCD	12	0	2895.21	3	965.741	-1.05	85.88	6616	20110105_LM_HJ_Epac_Rev_007_F12.raw
LGAPENSGISpTLER	1	S(7): 0.0; S(10): 0.0; T(11): 100.0	376	Q9Y4F1	FERM, RhoGEF and pleckstrin domain-containing protein 1 OS=Homo sapiens GN=FARP1 PE=1 SV=1 - [FARP1_HUMAN]	1	Q9Y4F1	T24	FERM, RhoGEF and pleckstrin domain-containing protein 1 (Chondrocyte-derived ezrin-like protein) (Pleckstrin homology domain-containing family C member 2) (PH domain-containing family C member 2)	FARP1 CDEP PLEKHC2																					Reverse	Class I	lGAPENSGIStLER	1	N-Term(Dimethyl); T11(Phospho)	91	ETD	14	0	1551.74	3	517.919	1.09	97.26	7446	20110105_LM_HJ_Epac_Rev_007_F14.raw
RTPpSDDEEDNLFAPPK	1	T(2): 0.0; S(4): 100.0	376	Q641Q2;Q9Y4E1	Protein FAM21A OS=Homo sapiens GN=FAM21A PE=1 SV=3 - [FA21A_HUMAN]|Protein FAM21C OS=Homo sapiens GN=FAM21C PE=1 SV=2 - [FA21C_HUMAN]	2	Q641Q2	S333	WASH complex subunit FAM21A	FAM21A	Q9Y4E1	S333	WASH complex subunit FAM21C (Vaccinia virus penetration factor) (VPEF)	FAM21C KIAA0592																	Reverse	Class I	rTPsDDEEDNLFAPPk	1	N-Term(Dimethyl:2H(4)); S4(Phospho); K16(Dimethyl:2H(4))	76	ETD	28	1	1974.92	3	658.98	-2.83	113.44	7519	20110105_LM_HJ_Epac_Rev_007_F28_2.raw
SFSKEELMSpSDLEETAGSTSIPK	1	S(1): 0.0; S(3): 0.0; S(9): 0.0; S(10): 100.0; T(15): 0.0; S(18): 0.0; T(19): 0.0; S(20): 0.0	376	O00567	Nucleolar protein 5A OS=Homo sapiens GN=NOL5A PE=1 SV=4 - [NOL5A_HUMAN]	1	O00567	S520	Nucleolar protein 56 (Nucleolar protein 5A)	NOP56 NOL5A																					Forward	Class I	sFSkEELmSsDLEETAGSTSIPk	1	N-Term(Dimethyl:2H(4)); K4(Dimethyl:2H(4)); M8(Oxidation); S10(Phospho); K23(Dimethyl:2H(4))	52	HCD	28	1	2665.3	3	889.103	-0.21	117.86	8049	OR5_101221_LM_HJ_Epac1_007_SCX_Phospho_F28.raw
LTFDTTFpSPNTGKK	1	T(2): 0.0; T(5): 0.0; T(6): 0.0; S(8): 100.0; T(11): 0.0	376	P45880	Voltage-dependent anion-selective channel protein 2 OS=Homo sapiens GN=VDAC2 PE=1 SV=2 - [VDAC2_HUMAN]	1	P45880	S115	Voltage-dependent anion-selective channel protein 2 (VDAC-2) (hVDAC2) (Outer mitochondrial membrane protein porin 2)	VDAC2																					Forward	Class I	lTFDTTFsPNTGkk	1	N-Term(Dimethyl:2H(4)); S8(Phospho); K13(Dimethyl:2H(4)); K14(Dimethyl:2H(4))	62	ETD	27	1	1732.93	3	578.315	0.15	124.28	8067	OR5_101221_LM_HJ_Epac1_007_SCX_Phospho_F27.raw
GLRDSHpSpSEEDEASSQTDLSQTISK	2	S(5): 0.0; S(7): 100.0; S(8): 100.0; S(14): 0.0; S(15): 0.0; T(17): 0.0; S(20): 0.0; T(22): 0.0; S(24): 0.0	376	Q5JTV8	Torsin-1A-interacting protein 1 OS=Homo sapiens GN=TOR1AIP1 PE=1 SV=2 - [TOIP1_HUMAN]	1	Q5JTV8	S156, S157	Torsin-1A-interacting protein 1 (Lamin-associated protein 1B) (LAP1B)	TOR1AIP1																					Reverse	Class I	gLRDSHssEEDEASSQTDLSQTISk	1	N-Term(Dimethyl); S7(Phospho); S8(Phospho); K25(Dimethyl)	78	HCD	28	1	2923.27	3	975.094	14.63	101.66	8703	20110114_LM_HJ_Epac_Rev_007_F28_2.raw
YGpSFEEAEASYPILNR	1	Y(1): 0.0; S(3): 100.0; S(10): 0.0; Y(11): 0.0	376	O95425	Supervillin OS=Homo sapiens GN=SVIL PE=1 SV=1 - [SVIL_HUMAN]	1	O95425	S968	Supervillin (Archvillin) (p205/p250)	SVIL																					Forward	Class I	yGsFEEAEASYPILNR	1	N-Term(Dimethyl:2H(4)); S3(Phospho)	78	HCD	13	0	1957.89	2	979.45	2.71	141.65	9660	OR5_101216_LM_HJ_Epac1_007_SCX_Phospho_F13.raw
ATTDLGRpSLGPVELLLR	1	T(2): 0.0; T(3): 0.0; S(8): 100.0	375	Q16512	Serine/threonine-protein kinase N1 OS=Homo sapiens GN=PKN1 PE=1 SV=1 - [PKN1_HUMAN]	1	Q16512	S69	Serine/threonine-protein kinase N1 (EC 2.7.11.13) (Protease-activated kinase 1) (PAK-1) (Protein kinase C-like 1) (Protein kinase C-like PKN) (Protein kinase PKN-alpha) (Protein-kinase C-related kinase 1) (Serine-threonine protein kinase N)	PKN1 PAK1 PKN PRK1 PRKCL1																					Reverse	Class I	aTTDLGRsLGPVELLLR	1	N-Term(Dimethyl); S8(Phospho)	70	ETD	27	1	1919.04	3	640.351	1.93	147.87	10137	20110105_LM_HJ_Epac_Rev_007_F27_2.raw
pSLTNLSFLTDSEK	1	S(1): 100.0; T(3): 0.0; S(6): 0.0; T(9): 0.0; S(11): 0.0	375	Q8NEY1	Neuron navigator 1 OS=Homo sapiens GN=NAV1 PE=1 SV=2 - [NAV1_HUMAN]	1	Q8NEY1	S90	Neuron navigator 1 (Pore membrane and/or filament-interacting-like protein 3) (Steerin-1) (Unc-53 homolog 1) (unc53H1)	NAV1 KIAA1151 KIAA1213 POMFIL3 STEERIN1																					Reverse	Class I	sLTNLSFLTDSEk	1	N-Term(Dimethyl); S1(Phospho); K13(Dimethyl)	92	ETD	13	0	1590.77	3	530.927	0.79	145.34	10647	20110105_LM_HJ_Epac_Rev_007_F13.raw
NFDFEGSLpSPVIAPK	1	S(7): 0.0; S(9): 100.0	375	Q9H1A4	Anaphase-promoting complex subunit 1 OS=Homo sapiens GN=ANAPC1 PE=1 SV=1 - [APC1_HUMAN]	1	Q9H1A4	S688	Anaphase-promoting complex subunit 1 (APC1) (Cyclosome subunit 1) (Mitotic checkpoint regulator) (Testis-specific gene 24 protein)	ANAPC1 TSG24																					Forward	Class I	nFDFEGSLsPVIAPk	1	N-Term(Dimethyl); S9(Phospho); K15(Dimethyl)	82	ETD	14	0	1756.86	3	586.29	0.07	145.37	10670	OR5_101221_LM_HJ_Epac1_007_SCX_Phospho_F14.raw
FLNRpSPEEpSFDIK	2	S(5): 100.0; S(9): 100.0	375	Q96S38	Ribosomal protein S6 kinase delta-1 OS=Homo sapiens GN=RPS6KC1 PE=1 SV=2 - [KS6C1_HUMAN]	1	Q96S38	S423, S427	Ribosomal protein S6 kinase delta-1 (S6K-delta-1) (EC 2.7.11.1) (52 kDa ribosomal protein S6 kinase) (Ribosomal S6 kinase-like protein with two PSK domains 118 kDa protein) (SPHK1-binding protein)	RPS6KC1 RPK118																					Forward	Class I	fLNRsPEEsFDIk	1	N-Term(Dimethyl); S5(Phospho); S9(Phospho); K13(Dimethyl)	58	ETD	14	1	1797.79	3	599.934	0.28	127.36	10871	OR5_101215_LM_HJ_Epac1_007_SCX_Phospho_F14.raw
MQNNSSPpSISPNTSFTSDGSPSPLGGIK	1	S(5): 0.0; S(6): 0.8; S(8): 98.3; S(10): 0.8; T(13): 0.0; S(14): 0.0; T(16): 0.0; S(17): 0.0; S(20): 0.0; S(22): 0.0	375	Q9H0D6	5'-3' exoribonuclease 2 OS=Homo sapiens GN=XRN2 PE=1 SV=1 - [XRN2_HUMAN]	1	Q9H0D6	S473	5'-3' exoribonuclease 2 (EC 3.1.13.-) (DHM1-like protein) (DHP protein)	XRN2																					Forward	Class I	mQNNSSPsISPNTSFTSDGSPSPLGGIk	1	N-Term(Dimethyl:2H(4)); S8(Phospho); K28(Dimethyl:2H(4))	69	HCD	14	0	2951.39	3	984.468	-1.38	138.98	11822	OR5_101215_LM_HJ_Epac1_007_SCX_Phospho_F14.raw
DASSpSPASTASSASSTSLK	1	S(3): 0.0; S(4): 0.0; S(5): 100.0; S(8): 0.0; T(9): 0.0; S(11): 0.0; S(12): 0.0; S(14): 0.0; S(15): 0.0; T(16): 0.0; S(17): 0.0	375	Q04724	Transducin-like enhancer protein 1 OS=Homo sapiens GN=TLE1 PE=1 SV=2 - [TLE1_HUMAN]	1	Q04724	S286	Transducin-like enhancer protein 1 (E(Sp1) homolog) (Enhancer of split groucho-like protein 1) (ESG1)	TLE1																					Forward	Class I	dASSsPASTASSASSTSLk	1	N-Term(Dimethyl); S5(Phospho); K19(Dimethyl)	87	ETD	13	0	1877.84	3	626.619	1.91	61.12	4311	OR5_101216_LM_HJ_Epac1_007_SCX_Phospho_F13.raw
AMLDQLMGTpSRDGDTTR	1	T(9): 0.1; S(10): 99.9; T(15): 0.0; T(16): 0.0	375	Q9Y383	Putative RNA-binding protein Luc7-like 2 OS=Homo sapiens GN=LUC7L2 PE=1 SV=2 - [LC7L2_HUMAN]	1	Q9Y383	S18	Putative RNA-binding protein Luc7-like 2	LUC7L2 CGI-59 CGI-74																					Reverse	Class I	amLDQLmGTsRDGDTTR	1	N-Term(Dimethyl); M2(Oxidation); M7(Oxidation); S10(Phospho)	63	ETD	27	1	2007.85	3	669.955	0.09	66.78	4568	20110105_LM_HJ_Epac_Rev_007_F27_2.raw
IIGEDpSPSRLDR	1	S(6): 100.0; S(8): 0.0	375	Q9Y618	Nuclear receptor corepressor 2 OS=Homo sapiens GN=NCOR2 PE=1 SV=1 - [NCOR2_HUMAN]	1	Q9Y618	S1251	Nuclear receptor corepressor 2 (N-CoR2) (CTG repeat protein 26) (SMAP270) (Silencing mediator of retinoic acid and thyroid hormone receptor) (SMRT) (T3 receptor-associating factor) (TRAC) (Thyroid-, retinoic-acid-receptor-associated corepressor)	NCOR2 CTG26																					Forward	Class I	iIGEDsPSRLDR	1	N-Term(Dimethyl); S6(Phospho)	65	ETD	28	1	1465.71	3	489.24	0.54	64.94	4598	OR5_101221_LM_HJ_Epac1_007_SCX_Phospho_F28.raw
LSRGDpSLKEPTSIAESSR	1	S(2): 0.0; S(6): 100.0; T(11): 0.0; S(12): 0.0; S(16): 0.0; S(17): 0.0	375	Q9C0B5	Probable palmitoyltransferase ZDHHC5 OS=Homo sapiens GN=ZDHHC5 PE=1 SV=2 - [ZDHC5_HUMAN]	1	Q9C0B5	S380	Palmitoyltransferase ZDHHC5 (EC 2.3.1.-) (Zinc finger DHHC domain-containing protein 5) (DHHC-5) (Zinc finger protein 375)	ZDHHC5 KIAA1748 ZNF375																					Forward	Class I	lSRGDsLkEPTSIAESSR	1	N-Term(Dimethyl); S6(Phospho); K8(Dimethyl)	74	ETD	31	2	2069.03	3	690.347	0.07	73.26	4637	OR5_101221_LM_HJ_Epac1_007_SCX_Phospho_F31.raw
YKDIIRQPpSEEEIIK	1	Y(1): 0.0; S(9): 100.0	375	Q15121	Astrocytic phosphoprotein PEA-15 OS=Homo sapiens GN=PEA15 PE=1 SV=2 - [PEA15_HUMAN]	1	Q15121	S116	Astrocytic phosphoprotein PEA-15 (15 kDa phosphoprotein enriched in astrocytes) (Phosphoprotein enriched in diabetes) (PED)	PEA15																					Forward	Class I	ykDIIRQPsEEEIIk	1	N-Term(Dimethyl); K2(Dimethyl); S9(Phospho); K15(Dimethyl)	72	ETD	32	2	2025.07	3	675.694	0.97	103.48	5926	OR5_101221_LM_HJ_Epac1_007_SCX_Phospho_F32.raw
SLpSTSHLPGLTTHSNK	1	S(1): 0.0; S(3): 100.0; T(4): 0.0; S(5): 0.0; T(11): 0.0; T(12): 0.0; S(14): 0.0	375	Q9ULL8	Protein Shroom4 OS=Homo sapiens GN=SHROOM4 PE=1 SV=2 - [SHRM4_HUMAN]	1	Q9ULL8	S785	Protein Shroom4 (Second homolog of apical protein)	SHROOM4 KIAA1202 SHAP																					Forward	Class I	sLsTSHLPGLTTHSNk	1	N-Term(Dimethyl); S3(Phospho); K16(Dimethyl)	78	ETD	31	0	1815.9	3	605.972	0.01	96.32	5927	OR5_101217_LM_HJ_Epac1_007_SCX_Phospho_F31.raw
DLSTQLSRpTGTLSR	1	S(3): 0.0; T(4): 0.0; S(7): 0.0; T(9): 100.0; T(11): 0.0; S(13): 0.0	375	Q9P2A4	ABI gene family member 3 OS=Homo sapiens GN=ABI3 PE=1 SV=1 - [ABI3_HUMAN]	1	Q9P2A4	T163	ABI gene family member 3 (New molecule including SH3) (Nesh)	ABI3 NESH																					Forward	Class I	dLSTQLSRtGTLSR	1	N-Term(Dimethyl); T9(Phospho)	81	ETD	27	1	1642.82	3	548.277	-0.25	91.68	5983	OR5_101221_LM_HJ_Epac1_007_SCX_Phospho_F27.raw
pTPSDDEEDNLFAPPK	1	T(1): 99.7; S(3): 0.3	375	Q641Q2;Q9Y4E1	Protein FAM21A OS=Homo sapiens GN=FAM21A PE=1 SV=3 - [FA21A_HUMAN]|Protein FAM21C OS=Homo sapiens GN=FAM21C PE=1 SV=2 - [FA21C_HUMAN]	2	Q641Q2	T331	WASH complex subunit FAM21A	FAM21A	Q9Y4E1	T331	WASH complex subunit FAM21C (Vaccinia virus penetration factor) (VPEF)	FAM21C KIAA0592																	Reverse	Class I	tPSDDEEDNLFAPPk	1	N-Term(Dimethyl:2H(4)); T1(Phospho); K15(Dimethyl:2H(4))	60	HCD	12	0	1818.83	2	909.918	-0.35	82.73	6341	20110105_LM_HJ_Epac_Rev_007_F12.raw
GGGGGQDNGLEGLGNDpSR	1	S(17): 100.0	375	P08621	U1 small nuclear ribonucleoprotein 70 kDa OS=Homo sapiens GN=SNRP70 PE=1 SV=2 - [RU17_HUMAN]	1	P08621	S410	U1 small nuclear ribonucleoprotein 70 kDa (U1 snRNP 70 kDa) (U1-70K) (snRNP70)	SNRNP70 RNPU1Z RPU1 SNRP70 U1AP1																					Reverse	Class I	gGGGGQDNGLEGLGNDsR	1	N-Term(Dimethyl); S17(Phospho)	105	HCD	14	0	1767.73	2	884.37	1.29	83.06	6789	20110114_LM_HJ_Epac_Rev_007_F14.raw
GGPRPVpSSSIDPSLLSTK	1	S(7): 100.0; S(8): 0.0; S(9): 0.0; S(13): 0.0; S(16): 0.0; T(17): 0.0	375	Q8NEY1	Neuron navigator 1 OS=Homo sapiens GN=NAV1 PE=1 SV=2 - [NAV1_HUMAN]	1	Q8NEY1	S695	Neuron navigator 1 (Pore membrane and/or filament-interacting-like protein 3) (Steerin-1) (Unc-53 homolog 1) (unc53H1)	NAV1 KIAA1151 KIAA1213 POMFIL3 STEERIN1																					Forward	Class I	gGPRPVsSSIDPSLLSTk	1	N-Term(Dimethyl); S7(Phospho); K18(Dimethyl)	71	ETD	28	0	1934	3	645.339	1.21	116.52	8327	OR5_101217_LM_HJ_Epac1_007_SCX_Phospho_F28.raw
GLHSELGEpSSLILK	1	S(4): 0.0; S(9): 100.0; S(10): 0.0	375	P37023	Serine/threonine-protein kinase receptor R3 OS=Homo sapiens GN=ACVRL1 PE=1 SV=2 - [ACVL1_HUMAN]	1	P37023	S160	Serine/threonine-protein kinase receptor R3 (SKR3) (EC 2.7.11.30) (Activin receptor-like kinase 1) (ALK-1) (TGF-B superfamily receptor type I) (TSR-I)	ACVRL1 ACVRLK1 ALK1																					Reverse	Class I	gLHSELGEsSLILk	1	N-Term(Dimethyl); S9(Phospho); K14(Dimethyl)	90	ETD	28	0	1618.84	3	540.285	-2.21	130.31	8476	20110105_LM_HJ_Epac_Rev_007_F28_2.raw
DLGQpSNSDLDMPFAK	1	S(5): 100.0; S(7): 0.0	375	Q86W92	Liprin-beta-1 OS=Homo sapiens GN=PPFIBP1 PE=1 SV=2 - [LIPB1_HUMAN]	1	Q86W92	S636	Liprin-beta-1 (Protein tyrosine phosphatase receptor type f polypeptide-interacting protein-binding protein 1) (PTPRF-interacting protein-binding protein 1) (hSGT2)	PPFIBP1 KIAA1230																					Forward	Class I	dLGQsNSDLDmPFAk	1	N-Term(Dimethyl:2H(4)); S5(Phospho); M11(Oxidation); K15(Dimethyl:2H(4))	75	ETD	13	0	1797.82	3	599.946	0.43	123.35	8684	OR5_101221_LM_HJ_Epac1_007_SCX_Phospho_F13.raw
KLDDQpSEDEALELEGPLITPGSGSIYSSPGLYSK	1	S(6): 100.0; T(19): 0.0; S(22): 0.0; S(24): 0.0; Y(26): 0.0; S(27): 0.0; S(28): 0.0; Y(32): 0.0; S(33): 0.0	375	Q96AC1	Fermitin family homolog 2 OS=Homo sapiens GN=FERMT2 PE=1 SV=1 - [FERM2_HUMAN]	1	Q96AC1	S159	Fermitin family homolog 2 (Kindlin-2) (Mitogen-inducible gene 2 protein) (MIG-2) (Pleckstrin homology domain-containing family C member 1) (PH domain-containing family C member 1)	FERMT2 KIND2 MIG2 PLEKHC1																					Reverse	Class I	kLDDQsEDEALELEGPLITPGSGSIYSSPGLYSk	1	N-Term(Dimethyl); K1(Dimethyl); S6(Phospho); K34(Dimethyl)	60	HCD	27	1	3759.82	3	1253.94	1.24	144.11	9882	20110105_LM_HJ_Epac_Rev_007_F27_2.raw
RVTNDIpSPESpSPGVGR	2	T(3): 0.0; S(7): 100.0; S(10): 0.0; S(11): 100.0	374	Q15154	Pericentriolar material 1 protein OS=Homo sapiens GN=PCM1 PE=1 SV=2 - [PCM1_HUMAN]	1	Q15154	S65, S69	Pericentriolar material 1 protein (PCM-1) (hPCM-1)	PCM1																					Forward	Class I	rVTNDIsPESsPGVGR	1	N-Term(Dimethyl); S7(Phospho); S11(Phospho)	90	ETD	18-20	1	1858.81	3	620.275	1.14	46.8	3111	OR5_101217_LM_HJ_Epac1_007_SCX_Phospho_F18_F20.raw
KYEpSDEDSLGSSGR	1	Y(2): 0.0; S(4): 100.0; S(8): 0.0; S(11): 0.0; S(12): 0.0	374	O00418	Elongation factor 2 kinase OS=Homo sapiens GN=EEF2K PE=1 SV=1 - [EF2K_HUMAN]	1	O00418	S470	Eukaryotic elongation factor 2 kinase (eEF-2 kinase) (eEF-2K) (EC 2.7.11.20) (Calcium/calmodulin-dependent eukaryotic elongation factor 2 kinase)	EEF2K																					Forward	Class I	kYEsDEDSLGSSGR	1	N-Term(Dimethyl:2H(4)); K1(Dimethyl:2H(4)); S4(Phospho)	83	ETD	28	1	1673.75	3	558.588	-0.24	47.53	3444	OR5_101217_LM_HJ_Epac1_007_SCX_Phospho_F28.raw
RSpSSSSTTPTSANSLYR	1	S(2): 0.0; S(3): 100.0; S(4): 0.0; S(5): 0.0; S(6): 0.0; T(7): 0.0; T(8): 0.0; T(10): 0.0; S(11): 0.0; S(14): 0.0; Y(16): 0.0	374	Q0VF96	Cingulin-like protein 1 OS=Homo sapiens GN=CGNL1 PE=1 SV=1 - [CGNL1_HUMAN]	1	Q0VF96	S297	Cingulin-like protein 1 (Junction-associated coiled-coil protein) (Paracingulin)	CGNL1 JACOP KIAA1749																					Reverse	Class I	rSsSSSTTPTSANSLYR	1	N-Term(Dimethyl); S3(Phospho)	119	ETD	29	1	1909.87	3	637.294	0.72	55.75	3559	20110105_LM_HJ_Epac_Rev_007_F29.raw
RAQpSTDSLGTSGSLQSK	1	S(4): 99.9; T(5): 0.1; S(7): 0.0; T(10): 0.0; S(11): 0.0; S(13): 0.0; S(16): 0.0	374	Q15276	Rab GTPase-binding effector protein 1 OS=Homo sapiens GN=RABEP1 PE=1 SV=2 - [RABE1_HUMAN]	1	Q15276	S407	Rab GTPase-binding effector protein 1 (Rabaptin-4) (Rabaptin-5) (Rabaptin-5alpha) (Renal carcinoma antigen NY-REN-17)	RABEP1 RAB5EP RABPT5 RABPT5A																					Forward	Class I	rAQsTDSLGTSGSLQSk	1	N-Term(Dimethyl); S4(Phospho); K17(Dimethyl)	120	ETD	28	1	1858.89	3	620.302	0.12	53.28	3834	OR5_101221_LM_HJ_Epac1_007_SCX_Phospho_F28.raw
pSAGEEEDGPVLTDEQK	1	S(1): 100.0; T(12): 0.0	374	Q66PJ3	ADP-ribosylation factor-like protein 6-interacting protein 4 OS=Homo sapiens GN=ARL6IP4 PE=1 SV=1 - [AR6P4_HUMAN]	1	Q66PJ3	S271	ADP-ribosylation factor-like protein 6-interacting protein 4 (ARL-6-interacting protein 4) (Aip-4) (HSP-975) (HSVI-binding protein) (SR-15) (SRp25) (SR-25)	ARL6IP4																					Reverse	Class I	sAGEEEDGPVLTDEQk	1	N-Term(Dimethyl:2H(4)); S1(Phospho); K16(Dimethyl:2H(4))	98	ETD	12	0	1847.84	3	616.618	-0.36	54.99	4080	20110105_LM_HJ_Epac_Rev_007_F12.raw
LLEDpSEEpSSEETVSR	2	S(5): 100.0; S(8): 97.9; S(9): 2.1; T(12): 0.0; S(14): 0.0	374	O60231	Putative pre-mRNA-splicing factor ATP-dependent RNA helicase DHX16 OS=Homo sapiens GN=DHX16 PE=1 SV=2 - [DHX16_HUMAN]	1	O60231	S103, S106	Putative pre-mRNA-splicing factor ATP-dependent RNA helicase DHX16 (EC 3.6.4.13) (ATP-dependent RNA helicase #3) (DEAH-box protein 16)	DHX16 DBP2 DDX16 KIAA0577																					Forward	Class I	lLEDsEEsSEETVSR	1	N-Term(Dimethyl); S5(Phospho); S8(Phospho)	100	ETD	7	0	1897.74	3	633.251	1.08	57.35	4084	OR5_101215_LM_HJ_Epac1_007_SCX_Phospho_F7.raw
VAYEGpSDSEKGEGAEPLK	1	Y(3): 0.0; S(6): 100.0; S(8): 0.0	374	P78549	Endonuclease III-like protein 1 OS=Homo sapiens GN=NTHL1 PE=1 SV=2 - [NTHL1_HUMAN]	1	P78549	S71	Endonuclease III-like protein 1 (EC 4.2.99.18)	NTHL1 NTH1 OCTS3																					Reverse	Class I	vAYEGsDSEkGEGAEPLk	1	N-Term(Dimethyl); S6(Phospho); K10(Dimethyl); K18(Dimethyl)	94	ETD	27	1	2029.94	3	677.317	-0.8	63.28	4272	20110105_LM_HJ_Epac_Rev_007_F27.raw
QQIAEDPELTHpSSSNK	1	T(10): 0.0; S(12): 100.0; S(13): 0.0; S(14): 0.0	374	Q9ULC3	Ras-related protein Rab-23 OS=Homo sapiens GN=RAB23 PE=1 SV=1 - [RAB23_HUMAN]	1	Q9ULC3	S186	Ras-related protein Rab-23	RAB23 HSPC137																					Forward	Class I	qQIAEDPELTHsSSNk	1	N-Term(Dimethyl:2H(4)); S12(Phospho); K16(Dimethyl:2H(4))	73	ETD	27	0	1927.93	3	643.314	1.36	64.49	4368	OR5_101217_LM_HJ_Epac1_007_SCX_Phospho_F27.raw
FLSHpSTDSLNK	1	S(3): 0.0; S(5): 100.0; T(6): 0.0; S(8): 0.0	374	Q12802	A-kinase anchor protein 13 OS=Homo sapiens GN=AKAP13 PE=1 SV=2 - [AKP13_HUMAN]	1	Q12802	S1929	A-kinase anchor protein 13 (AKAP-13) (AKAP-Lbc) (Breast cancer nuclear receptor-binding auxiliary protein) (Guanine nucleotide exchange factor Lbc) (Human thyroid-anchoring protein 31) (Lymphoid blast crisis oncogene) (LBC oncogene) (Non-oncogenic Rho GTPase-specific GTP exchange factor) (Protein kinase A-anchoring protein 13) (PRKA13) (p47)	AKAP13 BRX HT31 LBC																					Forward	Class I	fLSHsTDSLNk	1	N-Term(Dimethyl); S5(Phospho); K11(Dimethyl)	68	ETD	28	0	1384.65	3	462.222	0.65	67.06	4870	OR5_101217_LM_HJ_Epac1_007_SCX_Phospho_F28.raw
KLSSNCSGVEGDVpTDEDEGAEMSQR	1	S(3): 0.0; S(4): 0.0; S(7): 0.0; T(14): 100.0; S(23): 0.0	374	Q9UPR0	Inactive phospholipase C-like protein 2 OS=Homo sapiens GN=PLCL2 PE=2 SV=2 - [PLCL2_HUMAN]	1	Q9UPR0	T584	Inactive phospholipase C-like protein 2 (PLC-L(2)) (PLC-L2) (Phospholipase C-L2) (Phospholipase C-epsilon-2) (PLC-epsilon-2)	PLCL2 KIAA1092 PLCE2																					Forward	Class I	kLSSNcSGVEGDVtDEDEGAEMSQR	1	K1(Dimethyl); N-Term(Dimethyl); C6(Carbamidomethyl); T14(Phospho)	79	HCD	28	1	2836.16	3	946.059	-0.43	78.48	5687	OR5_101217_LM_HJ_Epac1_007_SCX_Phospho_F28.raw
AQpSSPAAPASLSAPEPASQAR	1	S(3): 100.0; S(4): 0.0; S(10): 0.0; S(12): 0.0; S(18): 0.0	374	Q8WUI4	Histone deacetylase 7 OS=Homo sapiens GN=HDAC7 PE=1 SV=2 - [HDAC7_HUMAN]	1	Q8WUI4	S486	Histone deacetylase 7 (HD7) (EC 3.5.1.98) (Histone deacetylase 7A) (HD7a)	HDAC7 HDAC7A																					Forward	Class I	aQsSPAAPASLSAPEPASQAR	1	N-Term(Dimethyl:2H(4)); S3(Phospho)	122	ETD	13	0	2106.02	3	702.677	0.28	82.22	5756	OR5_101216_LM_HJ_Epac1_007_SCX_Phospho_F13.raw
ApSLGpSLEGEAEAEASSPK	2	S(2): 100.0; S(5): 100.0; S(15): 0.0; S(16): 0.0	374	Q09666	Neuroblast differentiation-associated protein AHNAK OS=Homo sapiens GN=AHNAK PE=1 SV=2 - [AHNK_HUMAN]	1	Q09666	S5749, S5752	Neuroblast differentiation-associated protein AHNAK (Desmoyokin)	AHNAK PM227																					Reverse	Class I	asLGsLEGEAEAEASSPk	1	N-Term(Dimethyl); S2(Phospho); S5(Phospho); K18(Dimethyl)	87	ETD	6	0	1948.82	3	650.278	-0.08	88.59	6391	20110105_LM_HJ_Epac_Rev_007_F6.raw
QPDISCILGTGGKpSPR	1	S(5): 0.0; T(10): 0.0; S(14): 100.0	374	P57740	Nuclear pore complex protein Nup107 OS=Homo sapiens GN=NUP107 PE=1 SV=1 - [NU107_HUMAN]	1	P57740	S86	Nuclear pore complex protein Nup107 (107 kDa nucleoporin) (Nucleoporin Nup107)	NUP107																					Reverse	Class I	qPDIScILGTGGksPR	1	N-Term(Dimethyl); C6(Carbamidomethyl); K13(Dimethyl); S14(Phospho)	80	ETD	28	1	1821.87	3	607.963	-10.33	122.78	7957	20110105_LM_HJ_Epac_Rev_007_F28.raw
LSSFSpSRDSLWNR	1	S(2): 0.0; S(3): 0.0; S(5): 0.0; S(6): 100.0; S(9): 0.0	374	Q9ULH1	130 kDa phosphatidylinositol 4,5-biphosphate-dependent ARF1 GTPase-activating protein OS=Homo sapiens GN=DDEF1 PE=1 SV=3 - [DDEF1_HUMAN]	1	Q9ULH1	S13	Arf-GAP with SH3 domain, ANK repeat and PH domain-containing protein 1 (130 kDa phosphatidylinositol 4,5-bisphosphate-dependent ARF1 GTPase-activating protein) (ADP-ribosylation factor-directed GTPase-activating protein 1) (ARF GTPase-activating protein 1) (Development and differentiation-enhancing factor 1) (DEF-1) (Differentiation-enhancing factor 1) (PIP2-dependent ARF1 GAP)	ASAP1 DDEF1 KIAA1249																					Forward	Class I	lSSFSsRDSLWNR	1	N-Term(Dimethyl:2H(4)); S6(Phospho)	69	ETD	29	1	1666.79	3	556.267	-1.76	129.69	8679	OR5_101217_LM_HJ_Epac1_007_SCX_Phospho_F29.raw
SMAHpSPGPVSQASPGTSSAVLFLSK	1	S(1): 0.0; S(5): 100.0; S(10): 0.0; S(13): 0.0; T(16): 0.0; S(17): 0.0; S(18): 0.0; S(24): 0.0	374	Q8TDZ2	NEDD9-interacting protein with calponin homology and LIM domains OS=Homo sapiens GN=MICAL1 PE=1 SV=2 - [MICA1_HUMAN]	1	Q8TDZ2	S617	Protein-methionine sulfoxide oxidase MICAL1 (EC 1.14.13.-) (Molecule interacting with CasL protein 1) (MICAL-1) (NEDD9-interacting protein with calponin homology and LIM domains)	MICAL1 MICAL NICAL																					Forward	Class I	sMAHsPGPVSQASPGTSSAVLFLSk	1	N-Term(Dimethyl:2H(4)); S5(Phospho); K25(Dimethyl:2H(4))	59	HCD	27	0	2587.29	3	863.101	-7.27	137.47	9043	OR5_101217_LM_HJ_Epac1_007_SCX_Phospho_F27.raw
NDARpSPGSISYLPSFFTK	1	S(5): 100.0; S(8): 0.0; S(10): 0.0; Y(11): 0.0; S(14): 0.0; T(17): 0.0	374	O75376	Nuclear receptor corepressor 1 OS=Homo sapiens GN=NCOR1 PE=1 SV=2 - [NCOR1_HUMAN]	1	O75376	S2184	Nuclear receptor corepressor 1 (N-CoR) (N-CoR1)	NCOR1 KIAA1047																					Reverse	Class I	nDARsPGSISYLPSFFTk	1	N-Term(Dimethyl:2H(4)); S5(Phospho); K18(Dimethyl:2H(4))	82	ETD	28	1	2131.07	3	711.029	0.49	144	9151	20110105_LM_HJ_Epac_Rev_007_F28.raw
SSSFSSWDDpSSDSYWKK	1	S(1): 0.0; S(2): 0.0; S(3): 0.0; S(5): 0.0; S(6): 0.0; S(10): 99.9; S(11): 0.1; S(13): 0.0; Y(14): 0.0	374	Q9NP61	ADP-ribosylation factor GTPase-activating protein 3 OS=Homo sapiens GN=ARFGAP3 PE=1 SV=1 - [ARFG3_HUMAN]	1	Q9NP61	S374	ADP-ribosylation factor GTPase-activating protein 3 (ARF GAP 3)	ARFGAP3 ARFGAP1																					Forward	Class I	sSSFSSWDDsSDSYWkk	1	N-Term(Dimethyl:2H(4)); S10(Phospho); K16(Dimethyl:2H(4)); K17(Dimethyl:2H(4))	84	ETD	28	1	2174.97	3	725.662	0.03	135.57	9630	OR5_101217_LM_HJ_Epac1_007_SCX_Phospho_F28.raw
RSSpSETILSSLAGSDIVK	1	S(2): 0.0; S(3): 0.0; S(4): 100.0; T(6): 0.0; S(9): 0.0; S(10): 0.0; S(14): 0.0	374	Q01850	Cerebellar degeneration-related protein 2 OS=Homo sapiens GN=CDR2 PE=1 SV=2 - [CDR2_HUMAN]	1	Q01850	S311	Cerebellar degeneration-related protein 2 (Major Yo paraneoplastic antigen) (Paraneoplastic cerebellar degeneration-associated antigen)	CDR2 PCD17																					Forward	Class I	rSSsETILSSLAGSDIVk	1	N-Term(Dimethyl:2H(4)); S4(Phospho); K18(Dimethyl:2H(4))	89	ETD	28	1	1994.08	3	665.366	8.44	141.27	9640	OR5_101221_LM_HJ_Epac1_007_SCX_Phospho_F28.raw
LGGQDpSFESIESYDSCDR	1	S(6): 100.0; S(9): 0.0; S(12): 0.0; Y(13): 0.0; S(15): 0.0	373	P14921	Protein C-ets-1 OS=Homo sapiens GN=ETS1 PE=1 SV=1 - [ETS1_HUMAN]	1	P14921	S251	Protein C-ets-1 (p54)	ETS1 EWSR2																					Forward	Class I	lGGQDsFESIESYDScDR	1	N-Term(Dimethyl:2H(4)); S6(Phospho); C16(Carbamidomethyl)	114	HCD	14	0	2176.87	2	1088.94	-0.88	130.75	11144	OR5_101215_LM_HJ_Epac1_007_SCX_Phospho_F14.raw
VLSTpSTDLEAAVADALK	1	S(3): 0.0; T(4): 0.0; S(5): 100.0; T(6): 0.0	373	Q7Z460	CLIP-associating protein 1 OS=Homo sapiens GN=CLASP1 PE=1 SV=1 - [CLAP1_HUMAN]	1	Q7Z460	S797	CLIP-associating protein 1 (Cytoplasmic linker-associated protein 1) (Multiple asters homolog 1) (Protein Orbit homolog 1) (hOrbit1)	CLASP1 KIAA0622 MAST1																					Reverse	Class I	vLSTsTDLEAAVADALk	1	N-Term(Dimethyl); S5(Phospho); K17(Dimethyl)	81	ETD	13	0	1839.94	3	613.983	0.24	152.8	11167	20110105_LM_HJ_Epac_Rev_007_F13.raw
HADNSpSDTEMEDMIAEETLEEMDSELLK	1	S(5): 0.8; S(6): 98.3; T(8): 0.8; T(18): 0.0; S(24): 0.0	373	Q8NDX5	Polyhomeotic-like protein 3 OS=Homo sapiens GN=PHC3 PE=1 SV=1 - [PHC3_HUMAN]	1	Q8NDX5	S762	Polyhomeotic-like protein 3 (Early development regulatory protein 3) (Homolog of polyhomeotic 3) (hPH3)	PHC3 EDR3 PH3																					Reverse	Class I	hADNSsDTEmEDmIAEETLEEmDSELLk	2	N-Term(Dimethyl); S6(Phospho); M10(Oxidation); M13(Oxidation); M22(Oxidation); K28(Dimethyl)	68	HCD	27	0	3396.41	3	1132.81	14.01	146.7	12320	20110114_LM_HJ_Epac_Rev_007_F27_2.raw
EAARpSPDKPGGpSPSASR	2	S(5): 100.0; S(12): 100.0; S(14): 0.0; S(16): 0.0	373	Q9Y3T9	Nucleolar complex protein 2 homolog OS=Homo sapiens GN=NOC2L PE=1 SV=3 - [NOC2L_HUMAN]	1	Q9Y3T9	S49, S56	Nucleolar complex protein 2 homolog (Protein NOC2 homolog) (NOC2-like protein) (Novel INHAT repressor)	NOC2L NIR																					Reverse	Class I	eAARsPDkPGGsPSASR	1	N-Term(Dimethyl); S5(Phospho); K8(Dimethyl); S12(Phospho)	70	ETD	29	1	1885.82	3	629.279	0.97	25.12	1815	20110105_LM_HJ_Epac_Rev_007_F29.raw
QAVEMKNDKpSEEEQSSSSVK	1	S(10): 100.0; S(15): 0.0; S(16): 0.0; S(17): 0.0; S(18): 0.0	373	P07910	Heterogeneous nuclear ribonucleoproteins C1/C2 OS=Homo sapiens GN=HNRNPC PE=1 SV=4 - [HNRPC_HUMAN]	1	P07910	S233	Heterogeneous nuclear ribonucleoproteins C1/C2 (hnRNP C1/C2)	HNRNPC HNRPC																					Forward	Class I	qAVEmkNDksEEEQSSSSVk	1	N-Term(Dimethyl); M5(Oxidation); K6(Dimethyl); K9(Dimethyl); S10(Phospho); K20(Dimethyl)	64	ETD	30	2	2448.12	4	612.786	0.89	29.18	2201	OR5_101217_LM_HJ_Epac1_007_SCX_Phospho_F30.raw
ADMTASGpSPDYGQPHK	1	T(4): 0.0; S(6): 0.0; S(8): 100.0; Y(11): 0.0	373	Q01543	Friend leukemia integration 1 transcription factor OS=Homo sapiens GN=FLI1 PE=1 SV=1 - [FLI1_HUMAN]	1	Q01543	S39	Friend leukemia integration 1 transcription factor (Proto-oncogene Fli-1) (Transcription factor ERGB)	FLI1																					Reverse	Class I	aDmTASGsPDYGQPHk	1	N-Term(Dimethyl:2H(4)); M3(Oxidation); S8(Phospho); K16(Dimethyl:2H(4))	86	HCD	27	0	1821.79	2	911.401	-1.4	36	2514	20110105_LM_HJ_Epac_Rev_007_F27_2.raw
RLpSMSEVKDDNSATK	1	S(3): 100.0; S(5): 0.0; S(12): 0.0; T(14): 0.0	373	Q8TDM6	Disks large homolog 5 OS=Homo sapiens GN=DLG5 PE=1 SV=4 - [DLG5_HUMAN]	1	Q8TDM6	S1666	Disks large homolog 5 (Discs large protein P-dlg) (Placenta and prostate DLG)	DLG5 KIAA0583 PDLG																					Forward	Class I	rLsmSEVkDDNSATk	1	N-Term(Dimethyl:2H(4)); S3(Phospho); M4(Oxidation); K8(Dimethyl:2H(4)); K15(Dimethyl:2H(4))	97	ETD	31	2	1872.95	3	624.989	-0.4	39.41	2774	OR5_101217_LM_HJ_Epac1_007_SCX_Phospho_F31.raw
GTDDSPKDpSQEDLQER	1	T(2): 0.0; S(5): 0.0; S(9): 100.0	373	Q969E4	Transcription elongation factor A protein-like 3 OS=Homo sapiens GN=TCEAL3 PE=1 SV=1 - [TCAL3_HUMAN]	1	Q969E4	S125	Transcription elongation factor A protein-like 3 (TCEA-like protein 3) (Transcription elongation factor S-II protein-like 3)	TCEAL3 MSTP072																					Forward	Class I	gTDDSPkDsQEDLQER	1	N-Term(Dimethyl); K7(Dimethyl); S9(Phospho)	79	ETD	27	1	1955.83	3	652.613	1.04	41.28	2861	OR5_101217_LM_HJ_Epac1_007_SCX_Phospho_F27.raw
DDKEEEEDGTGpSPQLNNR	1	T(10): 0.0; S(12): 100.0	373	P49407	Beta-arrestin-1 OS=Homo sapiens GN=ARRB1 PE=1 SV=2 - [ARRB1_HUMAN]	1	P49407	S412	Beta-arrestin-1 (Arrestin beta-1)	ARRB1 ARR1																					Forward	Class I	dDkEEEEDGTGsPQLNNR	1	N-Term(Dimethyl:2H(4)); K3(Dimethyl:2H(4)); S12(Phospho)	101	ETD	27	1	2176.95	3	726.322	1.07	44.56	2971	OR5_101221_LM_HJ_Epac1_007_SCX_Phospho_F27.raw
VGRQEpSVDDLDRDK	1	S(6): 100.0	373	O15021	Microtubule-associated serine/threonine-protein kinase 4 OS=Homo sapiens GN=MAST4 PE=1 SV=2 - [MAST4_HUMAN]	1	O15021	S1344	Microtubule-associated serine/threonine-protein kinase 4 (EC 2.7.11.1)	MAST4 KIAA0303																					Forward	Class I	vGRQEsVDDLDRDk	1	N-Term(Dimethyl); S6(Phospho); K14(Dimethyl)	73	ETD	32	2	1767.83	3	589.947	-0.59	52.29	3343	OR5_101221_LM_HJ_Epac1_007_SCX_Phospho_F32.raw
RLpSSTSLASGHSVR	1	S(3): 100.0; S(4): 0.0; T(5): 0.0; S(6): 0.0; S(9): 0.0; S(12): 0.0	373	Q9BZL6	Serine/threonine-protein kinase D2 OS=Homo sapiens GN=PRKD2 PE=1 SV=1 - [KPCD2_HUMAN]	1	Q9BZL6	S197	Serine/threonine-protein kinase D2 (EC 2.7.11.13) (nPKC-D2)	PRKD2 PKD2 HSPC187																					Forward	Class I	rLsSTSLASGHSVR	1	N-Term(Dimethyl); S3(Phospho)	93	ETD	33	1	1565.78	3	522.598	0.76	54.99	3611	OR5_101221_LM_HJ_Epac1_007_SCX_Phospho_F33.raw
DHSSQpSEEEVVEGEK	1	S(3): 0.0; S(4): 0.0; S(6): 100.0	373	O60238	BCL2/adenovirus E1B 19 kDa protein-interacting protein 3-like OS=Homo sapiens GN=BNIP3L PE=1 SV=1 - [BNI3L_HUMAN]	1	O60238	S120	BCL2/adenovirus E1B 19 kDa protein-interacting protein 3-like (Adenovirus E1B19K-binding protein B5) (BCL2/adenovirus E1B 19 kDa protein-interacting protein 3A) (NIP3-like protein X) (NIP3L)	BNIP3L BNIP3A BNIP3H NIX																					Forward	Class I	dHSSQsEEEVVEGEk	1	N-Term(Dimethyl); S6(Phospho); K15(Dimethyl)	77	ETD	27	0	1824.76	3	608.924	1.43	58.6	3896	OR5_101221_LM_HJ_Epac1_007_SCX_Phospho_F27.raw
SSGHSSSELpSPDAVEK	1	S(1): 0.0; S(2): 0.0; S(5): 0.0; S(6): 0.0; S(7): 0.0; S(10): 100.0	373	Q9UQ35	Serine/arginine repetitive matrix protein 2 OS=Homo sapiens GN=SRRM2 PE=1 SV=2 - [SRRM2_HUMAN]	1	Q9UQ35	S1387	Serine/arginine repetitive matrix protein 2 (300 kDa nuclear matrix antigen) (Serine/arginine-rich splicing factor-related nuclear matrix protein of 300 kDa) (SR-related nuclear matrix protein of 300 kDa) (Ser/Arg-related nuclear matrix protein of 300 kDa) (Splicing coactivator subunit SRm300) (Tax-responsive enhancer element-binding protein 803) (TaxREB803)	SRRM2 KIAA0324 SRL300 SRM300 HSPC075																					Reverse	Class I	sSGHSSSELsPDAVEk	1	N-Term(Dimethyl); S10(Phospho); K16(Dimethyl)	62	ETD	29	0	1752.77	3	584.927	-1.15	54.83	3923	20110105_LM_HJ_Epac_Rev_007_F29_2.raw
QQpSEEAFPQEQQK	1	S(3): 100.0	373	O94923	D-glucuronyl C5-epimerase OS=Homo sapiens GN=GLCE PE=1 SV=2 - [GLCE_HUMAN]	1	O94923	S73	D-glucuronyl C5-epimerase (EC 5.1.3.-) (Heparin/heparan sulfate:glucuronic acid C5-epimerase)	GLCE KIAA0836																					Forward	Class I	qQsEEAFPQEQQk	1	N-Term(Dimethyl:2H(4)); S3(Phospho); K13(Dimethyl:2H(4))	72	ETD	14	0	1720.81	3	574.273	1.29	62.82	4574	OR5_101221_LM_HJ_Epac1_007_SCX_Phospho_F14.raw
EIAIVHpSDAEK	1	S(7): 100.0	373	Q9H307	Pinin OS=Homo sapiens GN=PNN PE=1 SV=4 - [PININ_HUMAN]	1	Q9H307	S347	Pinin (140 kDa nuclear and cell adhesion-related phosphoprotein) (Desmosome-associated protein) (Domain-rich serine protein) (DRS protein) (DRSP) (Melanoma metastasis clone A protein) (Nuclear protein SDK3) (SR-like protein)	PNN DRS MEMA																					Forward	Class I	eIAIVHsDAEk	1	N-Term(Dimethyl:2H(4)); S7(Phospho); K11(Dimethyl:2H(4))	88	ETD	27	0	1355.7	3	452.573	-0.63	69.8	4700	OR5_101217_LM_HJ_Epac1_007_SCX_Phospho_F27.raw
RPIIAGMEFSRpSK	1	S(10): 0.0; S(12): 100.0	373	P21453	Sphingosine 1-phosphate receptor 1 OS=Homo sapiens GN=S1PR1 PE=1 SV=2 - [S1PR1_HUMAN]	1	P21453	S353	Sphingosine 1-phosphate receptor 1 (S1P receptor 1) (S1P1) (Endothelial differentiation G-protein coupled receptor 1) (Sphingosine 1-phosphate receptor Edg-1) (S1P receptor Edg-1) (CD antigen CD363)	S1PR1 CHEDG1 EDG1																					Reverse	Class I	rPIIAGmEFSRsk	1	N-Term(Dimethyl); M7(Oxidation); S12(Phospho); K13(Dimethyl)	76	ETD	33	1	1643.83	3	548.615	-2.28	75.99	4714	20110105_LM_HJ_Epac_Rev_007_F33_2.raw
DFAARpSPSApSITDEDSNV	2	S(6): 100.0; S(8): 0.1; S(10): 99.9; T(12): 0.0; S(16): 0.0	373	Q86W92	Liprin-beta-1 OS=Homo sapiens GN=PPFIBP1 PE=1 SV=2 - [LIPB1_HUMAN]	1	Q86W92	S999, S1003	Liprin-beta-1 (Protein tyrosine phosphatase receptor type f polypeptide-interacting protein-binding protein 1) (PTPRF-interacting protein-binding protein 1) (hSGT2)	PPFIBP1 KIAA1230																					Reverse	Class I	dFAARsPSAsITDEDSNV	1	N-Term(Dimethyl); S6(Phospho); S10(Phospho)	58	ETD	7	1	2069.81	3	690.609	1.74	68.79	4780	20110105_LM_HJ_Epac_Rev_007_F7.raw
TTRpTPEEGGYSYDISEK	1	T(1): 0.0; T(2): 0.0; T(4): 100.0; Y(10): 0.0; S(11): 0.0; Y(12): 0.0; S(15): 0.0	373	P46821	Microtubule-associated protein 1B OS=Homo sapiens GN=MAP1B PE=1 SV=1 - [MAP1B_HUMAN]	1	P46821	T1949	Microtubule-associated protein 1B (MAP-1B) [Cleaved into: MAP1 light chain LC1]	MAP1B																					Reverse	Class I	tTRtPEEGGYSYDISEk	1	N-Term(Dimethyl); T4(Phospho); K17(Dimethyl)	88	ETD	28	1	2068.91	3	690.307	-1.64	81.86	5641	20110105_LM_HJ_Epac_Rev_007_F28_2.raw
LLQSAKpTILRGTEEK	1	S(4): 0.0; T(7): 100.0; T(12): 0.0	373	O00418	Elongation factor 2 kinase OS=Homo sapiens GN=EEF2K PE=1 SV=1 - [EF2K_HUMAN]	1	O00418	T348	Eukaryotic elongation factor 2 kinase (eEF-2 kinase) (eEF-2K) (EC 2.7.11.20) (Calcium/calmodulin-dependent eukaryotic elongation factor 2 kinase)	EEF2K																					Forward	Class I	lLQSAktILRGTEEk	1	N-Term(Dimethyl); K6(Dimethyl); T7(Phospho); K15(Dimethyl)	67	ETD	31	2	1851.04	3	617.684	0.57	96.09	5857	OR5_101221_LM_HJ_Epac1_007_SCX_Phospho_F31.raw
ADLNQGIGEPQpSPSR	1	S(12): 100.0; S(14): 0.0	373	Q96C19	EF-hand domain-containing protein D2 OS=Homo sapiens GN=EFHD2 PE=1 SV=1 - [EFHD2_HUMAN]	1	Q96C19	S74	EF-hand domain-containing protein D2 (Swiprosin-1)	EFHD2 SWS1																					Reverse	Class I	aDLNQGIGEPQsPSR	1	N-Term(Dimethyl:2H(4)); S12(Phospho)	73	HCD	14	0	1680.79	2	840.898	0.13	78.12	6369	20110114_LM_HJ_Epac_Rev_007_F14.raw
YSSSGpSPANSFHFK	1	Y(1): 0.0; S(2): 0.0; S(3): 0.0; S(4): 0.0; S(6): 100.0; S(10): 0.0	373	O00418	Elongation factor 2 kinase OS=Homo sapiens GN=EEF2K PE=1 SV=1 - [EF2K_HUMAN]	1	O00418	S74	Eukaryotic elongation factor 2 kinase (eEF-2 kinase) (eEF-2K) (EC 2.7.11.20) (Calcium/calmodulin-dependent eukaryotic elongation factor 2 kinase)	EEF2K																					Forward	Class I	ySSSGsPANSFHFk	1	N-Term(Dimethyl:2H(4)); S6(Phospho); K14(Dimethyl:2H(4))	86	ETD	29	0	1659.77	3	553.927	-0.07	103.26	6935	OR5_101221_LM_HJ_Epac1_007_SCX_Phospho_F29.raw
pSLDMTDNSNNQLVVR	1	S(1): 100.0; T(5): 0.0; S(8): 0.0	373	Q14155	Rho guanine nucleotide exchange factor 7 OS=Homo sapiens GN=ARHGEF7 PE=1 SV=2 - [ARHG7_HUMAN]	1	Q14155	S176	Rho guanine nucleotide exchange factor 7 (Beta-Pix) (COOL-1) (PAK-interacting exchange factor beta) (p85)	ARHGEF7 COOL1 KIAA0142 P85SPR PAK3BP PIXB Nbla10314																					Reverse	Class I	sLDMTDNSNNQLVVR	1	N-Term(Dimethyl); S1(Phospho)	97	ETD	13	0	1813.82	3	605.278	2.03	118.99	8717	20110105_LM_HJ_Epac_Rev_007_F13.raw
FGQAATMEGIGAIGGpTPPAFNR	1	T(6): 0.0; T(16): 100.0	373	Q15233	Non-POU domain-containing octamer-binding protein OS=Homo sapiens GN=NONO PE=1 SV=4 - [NONO_HUMAN]	1	Q15233	T450	Non-POU domain-containing octamer-binding protein (NonO protein) (54 kDa nuclear RNA- and DNA-binding protein) (55 kDa nuclear protein) (DNA-binding p52/p100 complex, 52 kDa subunit) (NMT55) (p54(nrb)) (p54nrb)	NONO NRB54																					Forward	Class I	fGQAATmEGIGAIGGtPPAFNR	1	N-Term(Dimethyl:2H(4)); M7(Oxidation); T16(Phospho)	64	HCD	14	0	2291.08	3	764.366	0.1	136.47	9975	OR5_101221_LM_HJ_Epac1_007_SCX_Phospho_F14.raw
SpSPATSLFVELDEEEVK	1	S(1): 0.1; S(2): 99.9; T(5): 0.0; S(6): 0.0	372	Q9BXK5	Bcl-2-like 13 protein OS=Homo sapiens GN=BCL2L13 PE=1 SV=1 - [B2L13_HUMAN]	1	Q9BXK5	S371	Bcl-2-like protein 13 (Bcl2-L-13) (Bcl-rambo) (Protein Mil1)	BCL2L13 MIL1 CD003																					Reverse	Class I	ssPATSLFVELDEEEVk	1	N-Term(Dimethyl:2H(4)); S2(Phospho); K17(Dimethyl:2H(4))	79	ETD	13	0	2024	3	675.337	-0.63	148.53	10868	20110105_LM_HJ_Epac_Rev_007_F13.raw
ISMQDVDLSLGpSPK	1	S(2): 0.0; S(9): 0.0; S(12): 100.0	372	Q09666	Neuroblast differentiation-associated protein AHNAK OS=Homo sapiens GN=AHNAK PE=1 SV=2 - [AHNK_HUMAN]	1	Q09666	S511	Neuroblast differentiation-associated protein AHNAK (Desmoyokin)	AHNAK PM227																					Forward	Class I	iSMQDVDLSLGsPk	1	N-Term(Dimethyl:2H(4)); S12(Phospho); K14(Dimethyl:2H(4))	78	ETD	14	0	1633.84	3	545.284	0.38	149.01	12638	OR5_101215_LM_HJ_Epac1_007_SCX_Phospho_F14.raw
KGNEAVApSRDLSENNDQR	1	S(8): 100.0; S(12): 0.0	372	Q8NBJ4	Golgi membrane protein 1 OS=Homo sapiens GN=GOLM1 PE=1 SV=1 - [GOLM1_HUMAN]	1	Q8NBJ4	S187	Golgi membrane protein 1 (Golgi membrane protein GP73) (Golgi phosphoprotein 2)	GOLM1 C9orf155 GOLPH2 PSEC0242 UNQ686/PRO1326																					Reverse	Class I	kGNEAVAsRDLSENNDQR	1	N-Term(Dimethyl); K1(Dimethyl); S8(Phospho)	96	ETD	33	2	2138.98	3	713.665	-0.83	38.2	2652	20110105_LM_HJ_Epac_Rev_007_F33_2.raw
TKpSRIEQGIVDR	1	T(1): 0.0; S(3): 100.0	372	Q8IWT6	Leucine-rich repeat-containing protein 8A OS=Homo sapiens GN=LRRC8A PE=1 SV=1 - [LRC8A_HUMAN]	1	Q8IWT6	S217	Leucine-rich repeat-containing protein 8A	LRRC8A KIAA1437 LRRC8 UNQ221/PRO247																					Reverse	Class I	tksRIEQGIVDR	1	N-Term(Dimethyl); K2(Dimethyl); S3(Phospho)	73	ETD	33	2	1537.81	3	513.275	0.2	54.99	3589	20110105_LM_HJ_Epac_Rev_007_F33.raw
GRLDSSEMDHpSENEDYTMSSPLPGK	1	S(5): 0.0; S(6): 0.0; S(11): 100.0; Y(16): 0.0; T(17): 0.0; S(19): 0.0; S(20): 0.0	372	Q9NTI5	Sister chromatid cohesion protein PDS5 homolog B OS=Homo sapiens GN=PDS5B PE=1 SV=1 - [PDS5B_HUMAN]	1	Q9NTI5	S1182	Sister chromatid cohesion protein PDS5 homolog B (Androgen-induced proliferation inhibitor) (Androgen-induced prostate proliferative shutoff-associated protein AS3)	PDS5B APRIN AS3 KIAA0979																					Reverse	Class I	gRLDSSEmDHsENEDYTmSSPLPGk	1	N-Term(Dimethyl:2H(4)); M8(Oxidation); S11(Phospho); M18(Oxidation); K25(Dimethyl:2H(4))	81	HCD	31	1	2958.26	3	986.758	-1.42	73.44	4482	20110105_LM_HJ_Epac_Rev_007_F31_2.raw
SLpSPGKENVSALDMEK	1	S(1): 0.0; S(3): 100.0; S(10): 0.0	372	Q9H307	Pinin OS=Homo sapiens GN=PNN PE=1 SV=4 - [PININ_HUMAN]	1	Q9H307	S443	Pinin (140 kDa nuclear and cell adhesion-related phosphoprotein) (Desmosome-associated protein) (Domain-rich serine protein) (DRS protein) (DRSP) (Melanoma metastasis clone A protein) (Nuclear protein SDK3) (SR-like protein)	PNN DRS MEMA																					Forward	Class I	sLsPGkENVSALDmEk	1	N-Term(Dimethyl); S3(Phospho); K6(Dimethyl); M14(Oxidation); K16(Dimethyl)	97	ETD	27	1	1884.9	3	628.972	0.09	89.5	5933	OR5_101217_LM_HJ_Epac1_007_SCX_Phospho_F27.raw
AFTGREFDELNPpSAQR	1	T(3): 0.0; S(13): 100.0	372	P16615	Sarcoplasmic/endoplasmic reticulum calcium ATPase 2 OS=Homo sapiens GN=ATP2A2 PE=1 SV=1 - [AT2A2_HUMAN]	1	P16615	S663	Sarcoplasmic/endoplasmic reticulum calcium ATPase 2 (SERCA2) (SR Ca(2+)-ATPase 2) (EC 3.6.3.8) (Calcium pump 2) (Calcium-transporting ATPase sarcoplasmic reticulum type, slow twitch skeletal muscle isoform) (Endoplasmic reticulum class 1/2 Ca(2+) ATPase)	ATP2A2 ATP2B																					Forward	Class I	aFTGREFDELNPsAQR	1	N-Term(Dimethyl); S13(Phospho)	83	ETD	29	1	1945.88	3	649.299	0.66	119.43	8108	OR5_101217_LM_HJ_Epac1_007_SCX_Phospho_F29.raw
NQGGYGGSSSSpSSYGSGR	1	Y(5): 0.0; S(8): 0.0; S(9): 0.0; S(10): 0.0; S(11): 0.0; S(12): 100.0; S(13): 0.0; Y(14): 0.0; S(16): 0.0	371	P09651	Heterogeneous nuclear ribonucleoprotein A1 OS=Homo sapiens GN=HNRNPA1 PE=1 SV=4 - [ROA1_HUMAN]	1	P09651	S364	Heterogeneous nuclear ribonucleoprotein A1 (hnRNP A1) (Helix-destabilizing protein) (Single-strand RNA-binding protein) (hnRNP core protein A1)	HNRNPA1 HNRPA1																					Reverse	Class I	nQGGYGGSSSSsSYGSGR	1	N-Term(Dimethyl); S12(Phospho)	94	ETD	14	0	1802.7	3	601.571	0.45	40.4	2875	20110105_LM_HJ_Epac_Rev_007_F14.raw
RDpSDGVDGFEAEGKK	1	S(3): 100.0	371	Q96KR1	Zinc finger RNA-binding protein OS=Homo sapiens GN=ZFR PE=1 SV=2 - [ZFR_HUMAN]	1	Q96KR1	S1054	Zinc finger RNA-binding protein (hZFR) (M-phase phosphoprotein homolog)	ZFR																					Forward	Class I	rDsDGVDGFEAEGkk	1	N-Term(Dimethyl:2H(4)); S3(Phospho); K14(Dimethyl:2H(4)); K15(Dimethyl:2H(4))	90	ETD	31	2	1785.88	3	595.966	1.63	63.6	4135	OR5_101221_LM_HJ_Epac1_007_SCX_Phospho_F31.raw
APpSVANVGSHCDLSLK	1	S(3): 100.0; S(9): 0.0; S(14): 0.0	371	P21333	Filamin-A OS=Homo sapiens GN=FLNA PE=1 SV=4 - [FLNA_HUMAN]	1	P21333	S2152	Filamin-A (FLN-A) (Actin-binding protein 280) (ABP-280) (Alpha-filamin) (Endothelial actin-binding protein) (Filamin-1) (Non-muscle filamin)	FLNA FLN FLN1																					Forward	Class I	aPsVANVGSHcDLSLk	1	N-Term(Dimethyl:2H(4)); S3(Phospho); C11(Carbamidomethyl); K16(Dimethyl:2H(4))	73	HCD	27	0	1798.9	2	899.953	-1.3	96.09	6264	OR5_101221_LM_HJ_Epac1_007_SCX_Phospho_F27.raw
IVRGDQPAASGDpSDDDEPPPLPR	1	S(10): 0.0; S(13): 100.0	371	O00264	Membrane-associated progesterone receptor component 1 OS=Homo sapiens GN=PGRMC1 PE=1 SV=3 - [PGRC1_HUMAN]	1	O00264	S57	Membrane-associated progesterone receptor component 1 (mPR)	PGRMC1 HPR6.6 PGRMC																					Reverse	Class I	iVRGDQPAASGDsDDDEPPPLPR	1	N-Term(Dimethyl:2H(4)); S13(Phospho)	58	HCD	28	1	2516.16	3	839.391	-0.93	99.94	8302	20110114_LM_HJ_Epac_Rev_007_F28_2_110119042919.raw
AESSSGGGTVPSSAGILEQGPSPGDGpSPPKPK	1	S(3): 0.0; S(4): 0.0; S(5): 0.0; T(9): 0.0; S(12): 0.0; S(13): 0.0; S(22): 0.0; S(27): 100.0	371	Q68EM7	Rho GTPase-activating protein 17 OS=Homo sapiens GN=ARHGAP17 PE=1 SV=1 - [RHG17_HUMAN]	1	Q68EM7	S575	Rho GTPase-activating protein 17 (Rho-type GTPase-activating protein 17) (RhoGAP interacting with CIP4 homologs protein 1) (RICH-1)	ARHGAP17 RICH1 MSTP066 MSTP110																					Reverse	Class I	aESSSGGGTVPSSAGILEQGPSPGDGsPPkPk	1	N-Term(Dimethyl:2H(4)); S27(Phospho); K30(Dimethyl:2H(4)); K32(Dimethyl:2H(4))	66	HCD	27	0	3111.56	3	1037.86	-0.03	106.74	8963	20110114_LM_HJ_Epac_Rev_007_F27.raw
LTLNpSPIFDKPLSR	1	T(2): 0.0; S(5): 100.0; S(13): 0.0	371	Q00536	Serine/threonine-protein kinase PCTAIRE-1 OS=Homo sapiens GN=PCTK1 PE=1 SV=1 - [PCTK1_HUMAN]	1	Q00536	S138	Cyclin-dependent kinase 16 (EC 2.7.11.22) (Cell division protein kinase 16) (PCTAIRE-motif protein kinase 1) (Serine/threonine-protein kinase PCTAIRE-1)	CDK16 PCTK1																					Reverse	Class I	lTLNsPIFDkPLSR	1	N-Term(Dimethyl); S5(Phospho); K10(Dimethyl)	64	ETD	28	0	1736.93	3	579.649	-1.54	140.07	9089	20110105_LM_HJ_Epac_Rev_007_F28_2.raw
TLDHFpSSLGSVDSLDHPSSR	1	T(1): 0.0; S(6): 99.6; S(7): 0.4; S(10): 0.0; S(13): 0.0; S(18): 0.0; S(19): 0.0	370	Q13796	Protein Shroom2 OS=Homo sapiens GN=SHROOM2 PE=1 SV=1 - [SHRM2_HUMAN]	1	Q13796	S173	Protein Shroom2 (Apical-like protein) (Protein APXL)	SHROOM2 APXL																					Reverse	Class I	tLDHFsSLGSVDSLDHPSSR	1	N-Term(Dimethyl:2H(4)); S6(Phospho)	67	HCD	31	0	2269.04	3	757.019	-0.42	133.39	11479	20110114_LM_HJ_Epac_Rev_007_F31.raw
ASYHFSPEELDENTpSPLLGDAR	1	S(2): 0.0; Y(3): 0.0; S(6): 0.0; T(14): 0.4; S(15): 99.6	370	O75410	Transforming acidic coiled-coil-containing protein 1 OS=Homo sapiens GN=TACC1 PE=1 SV=2 - [TACC1_HUMAN]	1	O75410	S276	Transforming acidic coiled-coil-containing protein 1 (Gastric cancer antigen Ga55) (Taxin-1)	TACC1 KIAA1103																					Reverse	Class I	aSYHFSPEELDENTsPLLGDAR	1	N-Term(Dimethyl:2H(4)); S15(Phospho)	47	HCD	28	0	2560.15	3	854.055	-1.91	139.28	11818	20110114_LM_HJ_Epac_Rev_007_F28.raw
ITpSEAEDLVANFFPK	1	T(2): 0.0; S(3): 100.0	370	P61289	Proteasome activator complex subunit 3 OS=Homo sapiens GN=PSME3 PE=1 SV=1 - [PSME3_HUMAN]	1	P61289	S24	Proteasome activator complex subunit 3 (11S regulator complex subunit gamma) (REG-gamma) (Activator of multicatalytic protease subunit 3) (Ki nuclear autoantigen) (Proteasome activator 28 subunit gamma) (PA28g) (PA28gamma)	PSME3																					Reverse	Class I	iTsEAEDLVANFFPk	1	N-Term(Dimethyl); S3(Phospho); K15(Dimethyl)	72	ETD	14	0	1816.88	3	606.299	2.54	158.23	11973	20110105_LM_HJ_Epac_Rev_007_F14.raw
IDTHPpSPSHSSTVK	1	T(3): 0.0; S(6): 100.0; S(8): 0.0; S(10): 0.0; S(11): 0.0; T(12): 0.0	370	Q8NI27	THO complex subunit 2 OS=Homo sapiens GN=THOC2 PE=1 SV=1 - [THOC2_HUMAN]	1	Q8NI27	S1302	THO complex subunit 2 (Tho2) (hTREX120)	THOC2 CXorf3																					Reverse	Class I	iDTHPsPSHSSTVk	1	N-Term(Dimethyl:2H(4)); S6(Phospho); K14(Dimethyl:2H(4))	83	ETD	31	0	1636.81	3	546.276	-3.37	29.26	1974	20110105_LM_HJ_Epac_Rev_007_F31.raw
TKDSGpSISLQETRR	1	T(1): 0.0; S(4): 0.0; S(6): 100.0; S(8): 0.0; T(12): 0.0	370	Q9H2G2	STE20-like serine/threonine-protein kinase OS=Homo sapiens GN=SLK PE=1 SV=1 - [SLK_HUMAN]	1	Q9H2G2	S779	STE20-like serine/threonine-protein kinase (STE20-like kinase) (hSLK) (EC 2.7.11.1) (CTCL tumor antigen se20-9) (STE20-related serine/threonine-protein kinase) (STE20-related kinase) (Serine/threonine-protein kinase 2)	SLK KIAA0204 STK2																					Forward	Class I	tkDSGsISLQETRR	1	N-Term(Dimethyl); K2(Dimethyl); S6(Phospho)	84	ETD	33	2	1713.85	3	571.956	-0.28	49.9	3353	OR5_101221_LM_HJ_Epac1_007_SCX_Phospho_F33.raw
LLSVKGpSPKVDEK	1	S(3): 0.0; S(7): 100.0	370	Q96T58	Msx2-interacting protein OS=Homo sapiens GN=SPEN PE=1 SV=1 - [MINT_HUMAN]	1	Q96T58	S1287	Msx2-interacting protein (SMART/HDAC1-associated repressor protein) (SPEN homolog)	SPEN KIAA0929 MINT SHARP																					Reverse	Class I	lLSVkGsPkVDEk	1	N-Term(Dimethyl:2H(4)); K5(Dimethyl:2H(4)); S7(Phospho); K9(Dimethyl:2H(4)); K13(Dimethyl:2H(4))	85	ETD	31	2	1608	3	536.672	-3	55.53	3413	20110105_LM_HJ_Epac_Rev_007_F31.raw
[truncated: 16,029 more rows]

## Sheet: Class II Phosphopeptides
Peptide Sequence	# of Phospho-sites	pRS Site Probabilities	pRS Score	Protein Group Accessions	Protein Descriptions	# of Protein Groups	Acc. # 1	Sites Acc. # 1	Protein Names Acc. # 1	Gene Names Acc. # 1	Experiment Identified	Class Type	Sequence (MASCOT)	Search Engine Rank (MASCOT)	Modifications (MASCOT)	IonScore (MASCOT)	Activation Type	Fraction # Identified	# of Missed Cleavages	MH+ [Da]	Charge	m/z [Da]	ΔM [ppm]	RT [min]	Scan #	Spectrum File
[truncated: 6,219 more rows]
