# Supplementary material for: Quantitative global phosphoproteomics of human umbilical vein endothelial cells after activation of the Rap signaling pathway
Source: Royal Society of Chemistry journal article supplement (doi:10.1039/c3mb25524g), 2013-01-21
Supplement: c3mb25524g_4.xlsx [file c3mb25524g_4.xlsx]

## Sheet: Class I Phosphosites Fwd
Protein Group Accessions	# of Protein Groups	Protein Descriptions	Acc. # 1	Sites Acc. # 1	Protein Names Acc. # 1	Gene Names Acc. # 1	Phosposite Sequence Context	Predicted Kinase Group/Family/Subfamily	Predicted Kinases	Peptide Sequence	# of Phospho-sites	pRS Site Probabilities	pRS Score	Experiment Identifed	Class Type	Acc. # 2	Sites Acc. # 2	Protein Names Acc. # 2	Gene Names Acc. # 2	Acc. # 3	Sites Acc. # 3	Protein Names Acc. # 3	Gene Names Acc. # 3	Acc. # 4	Sites Acc. # 4	Protein Names Acc. # 4	Gene Names Acc. # 4	Acc. # 5	Sites Acc. # 5	Protein Names Acc. # 5	Gene Names Acc. # 5	Acc. # 6	Sites Acc. # 6	Protein Names Acc. # 6	Gene Names Acc. # 6	Acc. # 7	Sites Acc. # 7	Protein Names Acc. # 7	Gene Names Acc. # 7	Acc. # 8	Sites Acc. # 8	Protein Names Acc. # 8	Gene Names Acc. # 8	Acc. # 9	Sites Acc. # 9	Protein Names Acc. # 9	Gene Names Acc. # 9	Acc. # 10	Sites Acc. # 10
A0AVF1	1	Tetratricopeptide repeat protein 26 OS=Homo sapiens GN=TTC26 PE=2 SV=1 - [TTC26_HUMAN]	A0AVF1	Y538	Tetratricopeptide repeat protein 26 (TPR repeat protein 26)	TTC26	TGNTQVEYMIRIMKK			STGNTQVEpYMIR	1	S(1): 0.1; T(2): 0.1; T(5): 0.1; Y(9): 99.7	83	Forward	Class I
A0FGR8	1	Extended synaptotagmin-2 OS=Homo sapiens GN=FAM62B PE=1 SV=1 - [ESYT2_HUMAN]	A0FGR8	S699	Extended synaptotagmin-2 (E-Syt2) (Chr2Syt)	ESYT2 FAM62B KIAA1228	GSPGPGGSNTAPSTP			SHMSGSPGPGGpSNTAPSTPVIGGSDKPGMEEK	1	S(1): 0.2; S(4): 3.6; S(6): 3.6; S(12): 88.8; T(14): 3.6; S(17): 0.2; T(18): 0.0; S(24): 0.2	82	Forward	Class I
A0FGR8	1	Extended synaptotagmin-2 OS=Homo sapiens GN=FAM62B PE=1 SV=1 - [ESYT2_HUMAN]	A0FGR8	S704	Extended synaptotagmin-2 (E-Syt2) (Chr2Syt)	ESYT2 FAM62B KIAA1228	GGSNTAPSTPVIGGS			SHMSGSPGPGGSNTAPpSTPVIGGSDKPGMEEK	1	S(1): 0.1; S(4): 3.1; S(6): 3.1; S(12): 3.1; T(14): 3.1; S(17): 84.4; T(18): 3.1; S(24): 0.1	85	Forward	Class I
A0FGR9	1	Extended synaptotagmin-3 OS=Homo sapiens GN=FAM62C PE=2 SV=1 - [ESYT3_HUMAN]	A0FGR9	T611	Extended synaptotagmin-3 (E-Syt3) (Chr3Syt)	ESYT3 FAM62C	LLIKKVATNQGPKAQ			VApTNQGPK	1	T(3): 100.0	67	Forward	Class I
A0JLT2	1	Mediator of RNA polymerase II transcription subunit 19 OS=Homo sapiens GN=MED19 PE=1 SV=2 - [MED19_HUMAN]	A0JLT2	S194	Mediator of RNA polymerase II transcription subunit 19 (Lung cancer metastasis-related protein 1) (Mediator complex subunit 19)	MED19 LCMR1	PVPPETPSDSDHKKK			TQDPVPPETPpSDSDHK	1	T(1): 0.0; T(9): 0.0; S(11): 100.0; S(13): 0.0	188	Forward	Class I
A0JNW5	1	UHRF1-binding protein 1-like OS=Homo sapiens GN=UHRF1BP1L PE=1 SV=2 - [UH1BL_HUMAN]	A0JNW5	S989	UHRF1-binding protein 1-like	UHRF1BP1L KIAA0701	GLVYKSGSGEIGSET			SGpSGEIGSETSDKK	1	S(1): 0.5; S(3): 99.5; S(8): 0.0; T(10): 0.0; S(11): 0.0	253	Forward	Class I
A0MZ66	1	Shootin-1 OS=Homo sapiens GN=KIAA1598 PE=1 SV=3 - [SHOT1_HUMAN]	A0MZ66	S494	Shootin-1	KIAA1598	TAEADSSSPTGILAT			VTAEADSSpSPTGILATSESK	1	T(2): 0.0; S(7): 0.0; S(8): 0.1; S(9): 91.2; T(11): 8.7; T(16): 0.0; S(17): 0.0; S(19): 0.0	205	Forward	Class I
A0MZ66	1	Shootin-1 OS=Homo sapiens GN=KIAA1598 PE=1 SV=3 - [SHOT1_HUMAN]	A0MZ66	T496	Shootin-1	KIAA1598	EADSSSPTGILATSE			VTAEADSSSPpTGILATSESK	1	T(2): 5.9; S(7): 5.9; S(8): 5.9; S(9): 5.9; T(11): 76.4; T(16): 0.1; S(17): 0.0; S(19): 0.0	42	Forward	Class I
A0MZ66	1	Shootin-1 OS=Homo sapiens GN=KIAA1598 PE=1 SV=3 - [SHOT1_HUMAN]	A0MZ66	S506	Shootin-1	KIAA1598	LATSESKSMPVLGSV			pSMPVLGSVSSVTK	1	S(1): 100.0; S(7): 0.0; S(9): 0.0; S(10): 0.0; T(12): 0.0	216	Forward	Class I
A1A4S6	1	Rho GTPase-activating protein 10 OS=Homo sapiens GN=ARHGAP10 PE=1 SV=1 - [RHG10_HUMAN]	A1A4S6	S591	Rho GTPase-activating protein 10 (GTPase regulator associated with focal adhesion kinase 2) (Graf-related protein 2) (Rho-type GTPase-activating protein 10)	ARHGAP10 GRAF2	EPTCLSASPPNAPPR			TPPDTTFPEPTCLSApSPPNAPPR	1	T(1): 0.0; T(5): 0.0; T(6): 0.0; T(11): 0.0; S(14): 0.0; S(16): 100.0	257	Forward	Class I
A1L170	1	Uncharacterized protein FLJ13137 OS=Homo sapiens PE=1 SV=1 - [YA022_HUMAN]	A1L170	S223	Uncharacterized protein C1orf226	C1orf226	TECRRASSPSLIERN			ASpSPSLIER	1	S(2): 0.3; S(3): 99.7; S(5): 0.0	148	Forward	Class I
A1L390	1	Pleckstrin homology domain-containing family G member 3 OS=Homo sapiens GN=PLEKHG3 PE=1 SV=1 - [PKHG3_HUMAN]	A1L390	S76	Pleckstrin homology domain-containing family G member 3 (PH domain-containing family G member 3)	PLEKHG3 KIAA0599	LNVKGPLSPFNSRAA			GPLpSPFNSR	1	S(4): 100.0; S(8): 0.0	95	Forward	Class I
A2A3K4	1	Protein tyrosine phosphatase domain-containing protein 1 OS=Homo sapiens GN=PTPDC1 PE=2 SV=1 - [PTPC1_HUMAN]	A2A3K4	S392	Protein tyrosine phosphatase domain-containing protein 1 (EC 3.1.3.-)	PTPDC1 PTP9Q22	THLKRRLSYSDSDLK			RRLpSYSDSDLK	1	S(4): 99.9; Y(5): 0.1; S(6): 0.0; S(8): 0.0	248	Forward	Class I
A2RRP1	1	Neuroblastoma-amplified gene protein OS=Homo sapiens GN=NAG PE=1 SV=1 - [NAG_HUMAN]	A2RRP1	S473	Neuroblastoma-amplified sequence (Neuroblastoma-amplified gene protein)	NBAS NAG	EDEGEEDSDSDYEIS			AGEEDEGEEDpSDSDYEISAK	1	S(11): 100.0; S(13): 0.0; Y(15): 0.0; S(18): 0.0	413	Forward	Class I
A2RRP1	1	Neuroblastoma-amplified gene protein OS=Homo sapiens GN=NAG PE=1 SV=1 - [NAG_HUMAN]	A2RRP1	S475	Neuroblastoma-amplified sequence (Neuroblastoma-amplified gene protein)	NBAS NAG	EGEEDSDSDYEISAK			AGEEDEGEEDSDpSDYEISAK	1	S(11): 4.1; S(13): 95.9; Y(15): 0.0; S(18): 0.0	171	Forward	Class I
A2RUS2	1	DENN domain-containing protein 3 OS=Homo sapiens GN=DENND3 PE=2 SV=2 - [DEND3_HUMAN]	A2RUS2	S490	DENN domain-containing protein 3	DENND3 KIAA0870	ELAPRNSSLRLTDTA			NSpSLRLTDTAGCR	1	S(2): 0.0; S(3): 100.0; T(7): 0.0; T(9): 0.0	212	Forward	Class I
A3KN83	1	Protein strawberry notch homolog 1 OS=Homo sapiens GN=SBNO1 PE=1 SV=1 - [SBNO1_HUMAN]	A3KN83	T144	Protein strawberry notch homolog 1 (Monocyte protein 3) (MOP-3)	SBNO1 MOP3	PTVRNAMTSAPSKDQ			NAMpTSAPSKDQVQLK	1	T(4): 86.7; S(5): 11.6; S(8): 1.7	113	Forward	Class I
A3KN83	1	Protein strawberry notch homolog 1 OS=Homo sapiens GN=SBNO1 PE=1 SV=1 - [SBNO1_HUMAN]	A3KN83	S212	Protein strawberry notch homolog 1 (Monocyte protein 3) (MOP-3)	SBNO1 MOP3	INDMKMRSFSPTMKV			pSFSPTMK	1	S(1): 98.9; S(3): 1.1; T(5): 0.0	16	Forward	Class I
A3KN83	1	Protein strawberry notch homolog 1 OS=Homo sapiens GN=SBNO1 PE=1 SV=1 - [SBNO1_HUMAN]	A3KN83	S214	Protein strawberry notch homolog 1 (Monocyte protein 3) (MOP-3)	SBNO1 MOP3	DMKMRSFSPTMKVPV			SFpSPTMK	1	S(1): 0.5; S(3): 99.5; T(5): 0.0	91	Forward	Class I
A4D0S4	1	Laminin subunit beta-4 OS=Homo sapiens GN=LAMB4 PE=2 SV=1 - [LAMB4_HUMAN]	A4D0S4	T1707	Laminin subunit beta-4 (Laminin beta-1-related protein)	LAMB4	AEKLAGDTEAKIRRI			LAGDpTEAKIR	1	T(5): 100.0	91	Forward	Class I
A4QPH2	1	Putative phosphatidylinositol 4-kinase alpha-like protein P2 OS=Homo sapiens GN=PI4KAP2 PE=5 SV=2 - [PI4P2_HUMAN]	A4QPH2	S70	Putative phosphatidylinositol 4-kinase alpha-like protein P2	PI4KAP2	FSSLLQRSMSLNIGR			pSMpSLNIGR	2	S(1): 100.0; S(3): 100.0	73	Forward	Class I
A4QPH2	1	Putative phosphatidylinositol 4-kinase alpha-like protein P2 OS=Homo sapiens GN=PI4KAP2 PE=5 SV=2 - [PI4P2_HUMAN]	A4QPH2	S72	Putative phosphatidylinositol 4-kinase alpha-like protein P2	PI4KAP2	SLLQRSMSLNIGRAK			pSMpSLNIGR	2	S(1): 100.0; S(3): 100.0	73	Forward	Class I
A4UGR9	1	Xin actin-binding repeat-containing protein 2 OS=Homo sapiens GN=XIRP2 PE=2 SV=2 - [XIRP2_HUMAN]	A4UGR9	T3054	Xin actin-binding repeat-containing protein 2 (Beta-xin) (Cardiomyopathy-associated protein 3) (Xeplin)	XIRP2 CMYA3	RRQIKIETRGRDSPP			IEpTRGR	1	T(3): 100.0	21	Forward	Class I
A5A3E0	1	ANKRD26-like family C member 1B OS=Homo sapiens GN=A26C1B PE=1 SV=1 - [A26CB_HUMAN]	A5A3E0	S13	POTE ankyrin domain family member F (ANKRD26-like family C member 1B) (Chimeric POTE-actin protein)	POTEF A26C1B	DSMPAASSVKKPFGL			MVVGVDSMPAASpSVK	1	S(7): 0.0; S(12): 0.0; S(13): 100.0	83	Forward	Class I
A5PL33	1	Protein KRBA1 OS=Homo sapiens GN=KRBA1 PE=2 SV=2 - [KRBA1_HUMAN]	A5PL33	S182	Protein KRBA1	KRBA1 KIAA1862	EPSPPTHSPSRRKSH			EGPGALGGEPSPPTHpSPSR	1	S(11): 0.0; T(14): 0.0; S(16): 100.0; S(18): 0.0	215	Forward	Class I
A5YKK6	1	CCR4-NOT transcription complex subunit 1 OS=Homo sapiens GN=CNOT1 PE=1 SV=2 - [CNOT1_HUMAN]	A5YKK6	T286	CCR4-NOT transcription complex subunit 1 (CCR4-associated factor 1) (Negative regulator of transcription subunit 1 homolog) (NOT1H) (hNOT1)	CNOT1 CDC39 KIAA1007 NOT1 AD-005	QFGVREVTAAQVARV			EVpTAAQVAR	1	T(3): 100.0	81	Forward	Class I
A5YKK6	1	CCR4-NOT transcription complex subunit 1 OS=Homo sapiens GN=CNOT1 PE=1 SV=2 - [CNOT1_HUMAN]	A5YKK6	T1058	CCR4-NOT transcription complex subunit 1 (CCR4-associated factor 1) (Negative regulator of transcription subunit 1 homolog) (NOT1H) (hNOT1)	CNOT1 CDC39 KIAA1007 NOT1 AD-005	TVTVTRPTGVSFKKD			TVTVTRPpTGVpSFKK	2	T(1): 5.7; T(3): 5.7; T(5): 5.7; T(8): 83.0; S(11): 99.8	55	Forward	Class I
A5YKK6	1	CCR4-NOT transcription complex subunit 1 OS=Homo sapiens GN=CNOT1 PE=1 SV=2 - [CNOT1_HUMAN]	A5YKK6	S1061	CCR4-NOT transcription complex subunit 1 (CCR4-associated factor 1) (Negative regulator of transcription subunit 1 homolog) (NOT1H) (hNOT1)	CNOT1 CDC39 KIAA1007 NOT1 AD-005	VTRPTGVSFKKDVPP			TVTVTRPpTGVpSFKK	2	T(1): 5.7; T(3): 5.7; T(5): 5.7; T(8): 83.0; S(11): 99.8	55	Forward	Class I
A6ND36	1	Protein FAM83G OS=Homo sapiens GN=FAM83G PE=1 SV=2 - [FA83G_HUMAN]	A6ND36	S650	Protein FAM83G	FAM83G	PPPRRQLSAPHITRG			RQLpSAPHITR	1	S(4): 100.0; T(9): 0.0	164	Forward	Class I
A6ND36	1	Protein FAM83G OS=Homo sapiens GN=FAM83G PE=1 SV=2 - [FA83G_HUMAN]	A6ND36	S760	Protein FAM83G	FAM83G	RLLPDPGSPRLAQNA			LLPDPGpSPR	1	S(7): 100.0	98	Forward	Class I
A6NFD8	1	Hairy and enhancer of split-related protein HELT OS=Homo sapiens GN=HELT PE=2 SV=1 - [HELT_HUMAN]	A6NFD8	T80	Hairy and enhancer of split-related protein HELT (HES/HEY-like transcription factor)	HELT	CLNELGKTVPMALAK			pTVPMALAK	1	T(1): 100.0	81	Forward	Class I
A6NFI3	1	Zinc finger protein 316 OS=Homo sapiens GN=ZNF316 PE=3 SV=1 - [ZN316_HUMAN]	A6NFI3	S112	Zinc finger protein 316	ZNF316	SRGGDAKSPVLQEKG			GGDAKpSPVLQEK	1	S(6): 100.0	305	Forward	Class I
A6NHR9	1	Structural maintenance of chromosomes flexible hinge domain-containing protein 1 OS=Homo sapiens GN=SMCHD1 PE=1 SV=2 - [SMHD1_HUMAN]	A6NHR9	S1974	Structural maintenance of chromosomes flexible hinge domain-containing protein 1	SMCHD1 KIAA0650	CNDSLRHSPKVETTD			CNDSLRHpSPKVETTDCPVPPK	1	S(4): 4.9; S(8): 85.4; T(13): 4.9; T(14): 4.9	40	Forward	Class I
A6NJ09	1	Putative RUNDC2-like protein 2 OS=Homo sapiens PE=4 SV=2 - [RUN2M_HUMAN]	A6NJ09	S191	Deleted	Deleted	YQKLDVKSIDDEDVD			LDVKpSIDDEDVDENEDDVYGNSSGR	1	S(5): 100.0; Y(19): 0.0; S(22): 0.0; S(23): 0.0	355	Forward	Class I
A6NKD9	1	Coiled-coil domain-containing protein 85C OS=Homo sapiens GN=CCDC85C PE=3 SV=1 - [CC85C_HUMAN]	A6NKD9	S246	Coiled-coil domain-containing protein 85C	CCDC85C	KAGATRRSLDDLSAP			pSLDDLSAPPHHR	1	S(1): 100.0; S(6): 0.0	237	Forward	Class I
A6NKD9	1	Coiled-coil domain-containing protein 85C OS=Homo sapiens GN=CCDC85C PE=3 SV=1 - [CC85C_HUMAN]	A6NKD9	S258	Coiled-coil domain-containing protein 85C	CCDC85C	SAPPHHRSIPNGLHD			pSIPNGLHDPSSTYIR	1	S(1): 100.0; S(10): 0.0; S(11): 0.0; T(12): 0.0; Y(13): 0.0	278	Forward	Class I
A6NL28	1	Putative tropomyosin alpha-3 chain-like protein OS=Homo sapiens PE=5 SV=2 - [TPM3L_HUMAN]	A6NL28	S61	Putative tropomyosin alpha-3 chain-like protein	0	EEKAADESERDMKVI			LEEEEKAADEpSERDMK	1	S(11): 100.0	133	Forward	Class I
A7E2Y1	1	Myosin-7B OS=Homo sapiens GN=MYH7B PE=2 SV=2 - [MYH7B_HUMAN]	A7E2Y1	S1291	Myosin-7B (Antigen MLAA-21) (Myosin cardiac muscle beta chain) (Myosin heavy chain 7B, cardiac muscle beta isoform) (Slow A MYH14)	MYH7B KIAA1512	RGRLQTESGELSRLL			GRLQTEpSGELSRLLEEK	1	T(5): 0.5; S(7): 96.6; S(11): 2.9	93	Forward	Class I
A7KAX9	1	Rho/Cdc42/Rac GTPase-activating protein RICS OS=Homo sapiens GN=RICS PE=1 SV=1 - [RICS_HUMAN]	A7KAX9	S587	Rho GTPase-activating protein 32 (Brain-specific Rho GTPase-activating protein) (GAB-associated Cdc42/Rac GTPase-activating protein) (GC-GAP) (GTPase regulator interacting with TrkA) (Rho-type GTPase-activating protein 32) (Rho/Cdc42/Rac GTPase-activating protein RICS) (RhoGAP involved in the beta-catenin-N-cadherin and NMDA receptor signaling) (p200RhoGAP) (p250GAP)	ARHGAP32 GRIT KIAA0712 RICS	ASLSRPKSLLVSSPS			pSLLVSSPSTK	1	S(1): 100.0; S(5): 0.0; S(6): 0.0; S(8): 0.0; T(9): 0.0	129	Forward	Class I
A7KAX9	1	Rho/Cdc42/Rac GTPase-activating protein RICS OS=Homo sapiens GN=RICS PE=1 SV=1 - [RICS_HUMAN]	A7KAX9	S706	Rho GTPase-activating protein 32 (Brain-specific Rho GTPase-activating protein) (GAB-associated Cdc42/Rac GTPase-activating protein) (GC-GAP) (GTPase regulator interacting with TrkA) (Rho-type GTPase-activating protein 32) (Rho/Cdc42/Rac GTPase-activating protein RICS) (RhoGAP involved in the beta-catenin-N-cadherin and NMDA receptor signaling) (p200RhoGAP) (p250GAP)	ARHGAP32 GRIT KIAA0712 RICS	GTLRSAKSEESLTSL			SAKpSEESLTSLHAVDGDSK	1	S(1): 0.0; S(4): 100.0; S(7): 0.0; T(9): 0.0; S(10): 0.0; S(18): 0.0	206	Forward	Class I
A7KAX9	1	Rho/Cdc42/Rac GTPase-activating protein RICS OS=Homo sapiens GN=RICS PE=1 SV=1 - [RICS_HUMAN]	A7KAX9	S856	Rho GTPase-activating protein 32 (Brain-specific Rho GTPase-activating protein) (GAB-associated Cdc42/Rac GTPase-activating protein) (GC-GAP) (GTPase regulator interacting with TrkA) (Rho-type GTPase-activating protein 32) (Rho/Cdc42/Rac GTPase-activating protein RICS) (RhoGAP involved in the beta-catenin-N-cadherin and NMDA receptor signaling) (p200RhoGAP) (p250GAP)	ARHGAP32 GRIT KIAA0712 RICS	TASSEPVSPLQEKLS			DAETGSSQCQTPGSTASSEPVpSPLQEK	1	T(4): 0.0; S(6): 0.0; S(7): 0.0; T(11): 0.0; S(14): 0.0; T(15): 0.0; S(17): 0.0; S(18): 0.0; S(22): 100.0	267	Forward	Class I
A7KAX9	1	Rho/Cdc42/Rac GTPase-activating protein RICS OS=Homo sapiens GN=RICS PE=1 SV=1 - [RICS_HUMAN]	A7KAX9	S892	Rho GTPase-activating protein 32 (Brain-specific Rho GTPase-activating protein) (GAB-associated Cdc42/Rac GTPase-activating protein) (GC-GAP) (GTPase regulator interacting with TrkA) (Rho-type GTPase-activating protein 32) (Rho/Cdc42/Rac GTPase-activating protein RICS) (RhoGAP involved in the beta-catenin-N-cadherin and NMDA receptor signaling) (p200RhoGAP) (p250GAP)	ARHGAP32 GRIT KIAA0712 RICS	EKVVYAFSPKIGRKL			VVYAFpSPK	1	Y(3): 5.3; S(6): 94.7	64	Forward	Class I
A7KAX9	1	Rho/Cdc42/Rac GTPase-activating protein RICS OS=Homo sapiens GN=RICS PE=1 SV=1 - [RICS_HUMAN]	A7KAX9	S952	Rho GTPase-activating protein 32 (Brain-specific Rho GTPase-activating protein) (GAB-associated Cdc42/Rac GTPase-activating protein) (GC-GAP) (GTPase regulator interacting with TrkA) (Rho-type GTPase-activating protein 32) (Rho/Cdc42/Rac GTPase-activating protein RICS) (RhoGAP involved in the beta-catenin-N-cadherin and NMDA receptor signaling) (p200RhoGAP) (p250GAP)	ARHGAP32 GRIT KIAA0712 RICS	ERDATNRSPTQIVKM			DATNRpSPTQIVK	1	T(3): 0.0; S(6): 100.0; T(8): 0.0	255	Forward	Class I
A7KAX9	1	Rho/Cdc42/Rac GTPase-activating protein RICS OS=Homo sapiens GN=RICS PE=1 SV=1 - [RICS_HUMAN]	A7KAX9	T954	Rho GTPase-activating protein 32 (Brain-specific Rho GTPase-activating protein) (GAB-associated Cdc42/Rac GTPase-activating protein) (GC-GAP) (GTPase regulator interacting with TrkA) (Rho-type GTPase-activating protein 32) (Rho/Cdc42/Rac GTPase-activating protein RICS) (RhoGAP involved in the beta-catenin-N-cadherin and NMDA receptor signaling) (p200RhoGAP) (p250GAP)	ARHGAP32 GRIT KIAA0712 RICS	DATNRSPTQIVKMKT			DATNRSPpTQIVK	1	T(3): 0.0; S(6): 0.3; T(8): 99.7	171	Forward	Class I
A7MBM2	1	Protein dispatched homolog 2 OS=Homo sapiens GN=DISP2 PE=2 SV=2 - [DISP2_HUMAN]	A7MBM2	S1050	Protein dispatched homolog 2	DISP2 DISPB KIAA1742	CPHPDRLSRVAFSLR			LpSRVAFSLR	1	S(2): 100.0; S(7): 0.0	120	Forward	Class I
A8CG34	1	Nuclear envelope pore membrane protein POM 121C OS=Homo sapiens GN=POM121C PE=1 SV=2 - [P121C_HUMAN]	A8CG34	S370	Nuclear envelope pore membrane protein POM 121C (Nuclear pore membrane protein 121-2) (POM121-2) (Pore membrane protein of 121 kDa C)	POM121C	NKRSRSSSMSSLTGA			SSpSMSSLTGAYTSGIPSSSR	1	S(1): 0.2; S(2): 0.2; S(3): 99.3; S(5): 0.2; S(6): 0.0; T(8): 0.0; Y(11): 0.0; T(12): 0.0; S(13): 0.0; S(17): 0.0; S(18): 0.0; S(19): 0.0	266	Forward	Class I
A8CG34	1	Nuclear envelope pore membrane protein POM 121C OS=Homo sapiens GN=POM121C PE=1 SV=2 - [P121C_HUMAN]	A8CG34	S373	Nuclear envelope pore membrane protein POM 121C (Nuclear pore membrane protein 121-2) (POM121-2) (Pore membrane protein of 121 kDa C)	POM121C	SRSSSMSSLTGAYTS			SSpSMSpSLTGAYTSGIPSSSR	2	S(1): 0.6; S(2): 0.6; S(3): 98.1; S(5): 1.3; S(6): 99.3; T(8): 0.0; Y(11): 0.0; T(12): 0.0; S(13): 0.0; S(17): 0.0; S(18): 0.0; S(19): 0.0	250	Forward	Class I
A8CG34	1	Nuclear envelope pore membrane protein POM 121C OS=Homo sapiens GN=POM121C PE=1 SV=2 - [P121C_HUMAN]	A8CG34	S412	Nuclear envelope pore membrane protein POM 121C (Nuclear pore membrane protein 121-2) (POM121-2) (Pore membrane protein of 121 kDa C)	POM121C	KRNGPSSSPFSSPAS			RNGPSSpSPFSSPASSR	1	S(5): 0.0; S(6): 0.5; S(7): 99.5; S(10): 0.0; S(11): 0.0; S(14): 0.0; S(15): 0.0	224	Forward	Class I
A8CG34	1	Nuclear envelope pore membrane protein POM 121C OS=Homo sapiens GN=POM121C PE=1 SV=2 - [P121C_HUMAN]	A8CG34	S477	Nuclear envelope pore membrane protein POM 121C (Nuclear pore membrane protein 121-2) (POM121-2) (Pore membrane protein of 121 kDa C)	POM121C	NSQSTPGSSGQRKRK			QNSNSQSTPGpSSGQR	1	S(3): 0.4; S(5): 2.1; S(7): 2.1; T(8): 2.1; S(11): 91.2; S(12): 2.1	79	Forward	Class I
A8K7I4	1	Calcium-activated chloride channel regulator 1 OS=Homo sapiens GN=CLCA1 PE=1 SV=2 - [CLCA1_HUMAN]	A8K7I4	S619	Calcium-activated chloride channel regulator 1 (Calcium-activated chloride channel family member 1) (hCLCA1) (Calcium-activated chloride channel protein 1) (CaCC-1) (hCaCC-1)	CLCA1 CACC1	ANIRQGASPILRASV			QGApSPILR	1	S(4): 100.0	68	Forward	Class I
A8MT51;Q16181	2	Septin-13 OS=Homo sapiens GN=SEPT13 PE=2 SV=2 - [SEP13_HUMAN]|Septin-7 OS=Homo sapiens GN=SEPT7 PE=1 SV=2 - [SEPT7_HUMAN]	A8MT51	S183	Deleted	Deleted	NKGQLTKSPLAQMEE	CMGC/CDK/CDC2	CDC2, CDK2	GQLTKpSPLAQMEEERR	1	T(4): 0.0; S(6): 100.0	227	Forward	Class I	Q16181	S334	Septin-7 (CDC10 protein homolog)	SEPT7 CDC10
B1AJZ9	1	Forkhead-associated domain-containing protein 1 OS=Homo sapiens GN=FHAD1 PE=2 SV=2 - [FHAD1_HUMAN]	B1AJZ9	T864	Forkhead-associated domain-containing protein 1 (FHA domain-containing protein 1)	FHAD1 KIAA1937	ETQKTKATESLKAES			TKApTESLK	1	T(1): 0.4; T(4): 99.6; S(6): 0.0	71	Forward	Class I
B1AL46	1	Protein FAM22E OS=Homo sapiens GN=FAM22E PE=2 SV=2 - [FA22E_HUMAN]	B1AL46	T518	Protein FAM22E	FAM22E	RAAPSRGTARLDSSS			GpTARLDSSSSK	1	T(2): 100.0; S(7): 0.0; S(8): 0.0; S(9): 0.0; S(10): 0.0	80	Forward	Class I
O00116	1	Alkyldihydroxyacetonephosphate synthase, peroxisomal OS=Homo sapiens GN=AGPS PE=1 SV=1 - [ADAS_HUMAN]	O00116	S65	Alkyldihydroxyacetonephosphate synthase, peroxisomal (Alkyl-DHAP synthase) (EC 2.5.1.26) (Aging-associated gene 5 protein) (Alkylglycerone-phosphate synthase)	AGPS AAG5	CKARRAASAATAAPT	Other/IKK	TBK1	AApSAATAAPTATPAAQESGTIPK	1	S(3): 100.0; T(6): 0.0; T(10): 0.0; T(12): 0.0; S(18): 0.0; T(20): 0.0	355	Forward	Class I
O00151	1	PDZ and LIM domain protein 1 OS=Homo sapiens GN=PDLIM1 PE=1 SV=4 - [PDLI1_HUMAN]	O00151	S90	PDZ and LIM domain protein 1 (C-terminal LIM domain protein 1) (Elfin) (LIM domain protein CLP-36)	PDLIM1 CLIM1 CLP36	RSEHKVWSPLVTEEG			VWpSPLVTEEGKR	1	S(3): 100.0; T(7): 0.0	259	Forward	Class I
O00151	1	PDZ and LIM domain protein 1 OS=Homo sapiens GN=PDLIM1 PE=1 SV=4 - [PDLI1_HUMAN]	O00151	S130	PDZ and LIM domain protein 1 (C-terminal LIM domain protein 1) (Elfin) (LIM domain protein CLP-36)	PDLIM1 CLIM1 CLP36	SAMPFTASPASSTTA			SAMPFTApSPASSTTAR	1	S(1): 0.0; T(6): 0.0; S(8): 100.0; S(11): 0.0; S(12): 0.0; T(13): 0.0; T(14): 0.0	236	Forward	Class I
O00159	1	Myosin-Ic OS=Homo sapiens GN=MYO1C PE=1 SV=2 - [MYO1C_HUMAN]	O00159	S373	Unconventional myosin-Ic (Myosin I beta) (MMI-beta) (MMIb)	MYO1C	LASKDVESPSWRSTT			SLASKDVEpSPSWR	1	S(1): 0.0; S(4): 0.0; S(9): 100.0; S(11): 0.0	378	Forward	Class I
O00159	1	Myosin-Ic OS=Homo sapiens GN=MYO1C PE=1 SV=2 - [MYO1C_HUMAN]	O00159	S375	Unconventional myosin-Ic (Myosin I beta) (MMI-beta) (MMIb)	MYO1C	SKDVESPSWRSTTVL			DVESPpSWR	1	S(4): 4.8; S(6): 95.2	72	Forward	Class I
O00159	1	Myosin-Ic OS=Homo sapiens GN=MYO1C PE=1 SV=2 - [MYO1C_HUMAN]	O00159	S829	Unconventional myosin-Ic (Myosin I beta) (MMI-beta) (MMIb)	MYO1C	WKYCRSISPEWKQQL			SIpSPEWK	1	S(1): 0.0; S(3): 100.0	106	Forward	Class I
O00161	1	Synaptosomal-associated protein 23 OS=Homo sapiens GN=SNAP23 PE=1 SV=1 - [SNP23_HUMAN]	O00161	S20	Synaptosomal-associated protein 23 (SNAP-23) (Vesicle-membrane fusion protein SNAP-23)	SNAP23	AHQITDESLESTRRI	Other/CK2	CK2a2	AHQITDEpSLESTRR	1	T(5): 0.0; S(8): 100.0; S(11): 0.0; T(12): 0.0	329	Forward	Class I
O00161	1	Synaptosomal-associated protein 23 OS=Homo sapiens GN=SNAP23 PE=1 SV=1 - [SNP23_HUMAN]	O00161	S23	Synaptosomal-associated protein 23 (SNAP-23) (Vesicle-membrane fusion protein SNAP-23)	SNAP23	ITDESLESTRRILGL	AGC/PKC	PKCa	AHQITDESLEpSTRR	1	T(5): 0.0; S(8): 0.8; S(11): 98.3; T(12): 0.8	141	Forward	Class I
O00161	1	Synaptosomal-associated protein 23 OS=Homo sapiens GN=SNAP23 PE=1 SV=1 - [SNP23_HUMAN]	O00161	S34	Synaptosomal-associated protein 23 (SNAP-23) (Vesicle-membrane fusion protein SNAP-23)	SNAP23	ILGLAIESQDAGIKT			ILGLAIEpSQDAGIK	1	S(8): 100.0	273	Forward	Class I
O00161	1	Synaptosomal-associated protein 23 OS=Homo sapiens GN=SNAP23 PE=1 SV=1 - [SNP23_HUMAN]	O00161	S110	Synaptosomal-associated protein 23 (SNAP-23) (Vesicle-membrane fusion protein SNAP-23)	SNAP23	WGDGGENSPCNVVSK			TTWGDGGENpSPCNVVSK	1	T(1): 0.0; T(2): 0.0; S(10): 100.0; S(16): 0.0	332	Forward	Class I
O00178	1	GTP-binding protein 1 OS=Homo sapiens GN=GTPBP1 PE=1 SV=3 - [GTPB1_HUMAN]	O00178	S25	GTP-binding protein 1 (G-protein 1) (GP-1) (GP1)	GTPBP1	MFAPEPSSPGAARAA			SAMDSPVPASMFAPEPSpSPGAAR	1	S(1): 0.0; S(5): 0.0; S(10): 0.0; S(17): 0.7; S(18): 99.3	327	Forward	Class I
O00178	1	GTP-binding protein 1 OS=Homo sapiens GN=GTPBP1 PE=1 SV=3 - [GTPB1_HUMAN]	O00178	S44	GTP-binding protein 1 (G-protein 1) (GP-1) (GP1)	GTPBP1	RLHGGFDSDCSEDGE			LHGGFDpSDCpSEDGEALNGEPELDLTSK	2	S(7): 100.0; S(10): 100.0; T(25): 0.0; S(26): 0.0	322	Forward	Class I
O00178	1	GTP-binding protein 1 OS=Homo sapiens GN=GTPBP1 PE=1 SV=3 - [GTPB1_HUMAN]	O00178	S47	GTP-binding protein 1 (G-protein 1) (GP-1) (GP1)	GTPBP1	GGFDSDCSEDGEALN			LHGGFDpSDCpSEDGEALNGEPELDLTSK	2	S(7): 100.0; S(10): 100.0; T(25): 0.0; S(26): 0.0	322	Forward	Class I
O00192	1	Armadillo repeat protein deleted in velo-cardio-facial syndrome OS=Homo sapiens GN=ARVCF PE=1 SV=1 - [ARVC_HUMAN]	O00192	S200	Armadillo repeat protein deleted in velo-cardio-facial syndrome	ARVCF	PEPRDSPSYGSLSRG			DSPpSYGSLSR	1	S(2): 1.4; S(4): 95.8; Y(5): 1.4; S(7): 1.4; S(9): 0.0	70	Forward	Class I
O00192	1	Armadillo repeat protein deleted in velo-cardio-facial syndrome OS=Homo sapiens GN=ARVCF PE=1 SV=1 - [ARVC_HUMAN]	O00192	S203	Armadillo repeat protein deleted in velo-cardio-facial syndrome	ARVCF	RDSPSYGSLSRGLGM			DSPSYGpSLSR	1	S(2): 0.0; S(4): 0.8; Y(5): 0.8; S(7): 98.3; S(9): 0.0	87	Forward	Class I
O00192	1	Armadillo repeat protein deleted in velo-cardio-facial syndrome OS=Homo sapiens GN=ARVCF PE=1 SV=1 - [ARVC_HUMAN]	O00192	S343	Armadillo repeat protein deleted in velo-cardio-facial syndrome	ARVCF	LDRLVRRSPSVDSAR			LVRRpSPSVDSAR	1	S(5): 100.0; S(7): 0.0; S(10): 0.0	268	Forward	Class I
O00192	1	Armadillo repeat protein deleted in velo-cardio-facial syndrome OS=Homo sapiens GN=ARVCF PE=1 SV=1 - [ARVC_HUMAN]	O00192	T642	Armadillo repeat protein deleted in velo-cardio-facial syndrome	ARVCF	EMDRNFDTLDLPKRT			DGEMDRNFDpTLDLPK	1	T(10): 100.0	397	Forward	Class I
O00192	1	Armadillo repeat protein deleted in velo-cardio-facial syndrome OS=Homo sapiens GN=ARVCF PE=1 SV=1 - [ARVC_HUMAN]	O00192	S871	Armadillo repeat protein deleted in velo-cardio-facial syndrome	ARVCF	SPGGFDDSTLPLVDK			GALSPGGFDDpSTLPLVDK	1	S(4): 0.0; S(11): 93.7; T(12): 6.3	163	Forward	Class I
O00192	1	Armadillo repeat protein deleted in velo-cardio-facial syndrome OS=Homo sapiens GN=ARVCF PE=1 SV=1 - [ARVC_HUMAN]	O00192	T872	Armadillo repeat protein deleted in velo-cardio-facial syndrome	ARVCF	PGGFDDSTLPLVDKS			GALSPGGFDDSpTLPLVDK	1	S(4): 0.0; S(11): 0.2; T(12): 99.8	358	Forward	Class I
O00192	1	Armadillo repeat protein deleted in velo-cardio-facial syndrome OS=Homo sapiens GN=ARVCF PE=1 SV=1 - [ARVC_HUMAN]	O00192	S879	Armadillo repeat protein deleted in velo-cardio-facial syndrome	ARVCF	TLPLVDKSLEGEKTG			GALSPGGFDDpSTLPLVDKpSLEGEK	2	S(4): 0.1; S(11): 88.0; T(12): 12.0; S(19): 100.0	62	Forward	Class I
O00192	1	Armadillo repeat protein deleted in velo-cardio-facial syndrome OS=Homo sapiens GN=ARVCF PE=1 SV=1 - [ARVC_HUMAN]	O00192	S915	Armadillo repeat protein deleted in velo-cardio-facial syndrome	ARVCF	ERRPRGASSAGEASE			GApSSAGEASEKEPLK	1	S(3): 100.0; S(4): 0.0; S(9): 0.0	330	Forward	Class I
O00192	1	Armadillo repeat protein deleted in velo-cardio-facial syndrome OS=Homo sapiens GN=ARVCF PE=1 SV=1 - [ARVC_HUMAN]	O00192	S916	Armadillo repeat protein deleted in velo-cardio-facial syndrome	ARVCF	RRPRGASSAGEASEK			RPRGApSpSAGEApSEK	3	S(6): 100.0; S(7): 100.0; S(12): 100.0	110	Forward	Class I
O00192	1	Armadillo repeat protein deleted in velo-cardio-facial syndrome OS=Homo sapiens GN=ARVCF PE=1 SV=1 - [ARVC_HUMAN]	O00192	S921	Armadillo repeat protein deleted in velo-cardio-facial syndrome	ARVCF	ASSAGEASEKEPLKL			RPRGApSpSAGEApSEK	3	S(6): 100.0; S(7): 100.0; S(12): 100.0	110	Forward	Class I
O00193	1	Small acidic protein OS=Homo sapiens GN=SMAP PE=1 SV=1 - [SMAP_HUMAN]	O00193	S17	Small acidic protein	SMAP C11orf58	HGVKRSASPDDDLGS	AGC/AKT	AKT1	RSApSPDDDLGSSNWEAADLGNEERK	1	S(2): 0.0; S(4): 100.0; S(11): 0.0; S(12): 0.0	361	Forward	Class I
O00193	1	Small acidic protein OS=Homo sapiens GN=SMAP PE=1 SV=1 - [SMAP_HUMAN]	O00193	S24	Small acidic protein	SMAP C11orf58	SPDDDLGSSNWEAAD			RSASPDDDLGpSSNWEAADLGNEERK	1	S(2): 0.6; S(4): 0.6; S(11): 98.2; S(12): 0.6	131	Forward	Class I
O00193	1	Small acidic protein OS=Homo sapiens GN=SMAP PE=1 SV=1 - [SMAP_HUMAN]	O00193	S87	Small acidic protein	SMAP C11orf58	LESQYQQSMDSKLSG			KINEELESQYQQpSMDSK	1	S(8): 0.0; Y(10): 0.0; S(13): 100.0; S(16): 0.0	164	Forward	Class I
O00203	1	AP-3 complex subunit beta-1 OS=Homo sapiens GN=AP3B1 PE=1 SV=2 - [AP3B1_HUMAN]	O00203	S53	AP-3 complex subunit beta-1 (Adapter-related protein complex 3 subunit beta-1) (Adaptor protein complex AP-3 subunit beta-1) (Beta-3A-adaptin) (Clathrin assembly protein complex 3 beta-1 large chain)	AP3B1 ADTB3A	DLKQMLESNKDSAKL			QMLEpSNK	1	S(5): 100.0	10	Forward	Class I
O00203	1	AP-3 complex subunit beta-1 OS=Homo sapiens GN=AP3B1 PE=1 SV=2 - [AP3B1_HUMAN]	O00203	Y274	AP-3 complex subunit beta-1 (Adapter-related protein complex 3 subunit beta-1) (Adaptor protein complex AP-3 subunit beta-1) (Beta-3A-adaptin) (Clathrin assembly protein complex 3 beta-1 large chain)	AP3B1 ADTB3A	EDNGKNFYESDDDQK	TK/PDGFR	KIT	NFpYESDDDQK	1	Y(3): 99.0; S(5): 1.0	93	Forward	Class I
O00203	1	AP-3 complex subunit beta-1 OS=Homo sapiens GN=AP3B1 PE=1 SV=2 - [AP3B1_HUMAN]	O00203	S276	AP-3 complex subunit beta-1 (Adapter-related protein complex 3 subunit beta-1) (Adaptor protein complex AP-3 subunit beta-1) (Beta-3A-adaptin) (Clathrin assembly protein complex 3 beta-1 large chain)	AP3B1 ADTB3A	NGKNFYESDDDQKEK	CK1	CK1a	NFYEpSDDDQKEK	1	Y(3): 0.0; S(5): 100.0	418	Forward	Class I
O00232	1	26S proteasome non-ATPase regulatory subunit 12 OS=Homo sapiens GN=PSMD12 PE=1 SV=3 - [PSD12_HUMAN]	O00232	T401	26S proteasome non-ATPase regulatory subunit 12 (26S proteasome regulatory subunit RPN5) (26S proteasome regulatory subunit p55)	PSMD12	SNLVVNKTIFAKVDR			pTIFAKVDR	1	T(1): 100.0	71	Forward	Class I
O00255	1	Menin OS=Homo sapiens GN=MEN1 PE=1 SV=3 - [MEN1_HUMAN]	O00255	S548	Menin	MEN1 SCG2	QVPAPAASPPPEGPV	Atypical/PIKK/FRAP	FRAP	GPEGGSTAQVPAPAApSPPPEGPVLTFQSEK	1	S(6): 0.0; T(7): 0.0; S(16): 100.0; T(25): 0.0; S(28): 0.0	309	Forward	Class I
O00264	1	Membrane-associated progesterone receptor component 1 OS=Homo sapiens GN=PGRMC1 PE=1 SV=3 - [PGRC1_HUMAN]	O00264	S54	Membrane-associated progesterone receptor component 1 (mPR)	PGRMC1 HPR6.6 PGRMC	RGDQPAASGDSDDDE	Other/CK2	CK2a2	GDQPAApSGDSDDDEPPPLPR	1	S(7): 93.0; S(10): 7.0	88	Forward	Class I
O00264	1	Membrane-associated progesterone receptor component 1 OS=Homo sapiens GN=PGRMC1 PE=1 SV=3 - [PGRC1_HUMAN]	O00264	S57	Membrane-associated progesterone receptor component 1 (mPR)	PGRMC1 HPR6.6 PGRMC	QPAASGDSDDDEPPP	Other/CK2	CK2a2	IVRGDQPAASGDpSDDDEPPPLPR	1	S(10): 0.0; S(13): 100.0	343	Forward	Class I
O00264	1	Membrane-associated progesterone receptor component 1 OS=Homo sapiens GN=PGRMC1 PE=1 SV=3 - [PGRC1_HUMAN]	O00264	Y180	Membrane-associated progesterone receptor component 1 (mPR)	PGRMC1 HPR6.6 PGRMC	EGEEPTVYSDEEEPK	TK/InsR	IRR	EGEEPTVpYSDEEEPKDESARK	1	T(6): 0.0; Y(8): 99.4; S(9): 0.6; S(18): 0.0	238	Forward	Class I
O00264	1	Membrane-associated progesterone receptor component 1 OS=Homo sapiens GN=PGRMC1 PE=1 SV=3 - [PGRC1_HUMAN]	O00264	S181	Membrane-associated progesterone receptor component 1 (mPR)	PGRMC1 HPR6.6 PGRMC	GEEPTVYSDEEEPKD	Other/CK2	CK2a2	EGEEPTVYpSDEEEPKDESAR	1	T(6): 0.0; Y(8): 1.4; S(9): 98.5; S(18): 0.0	266	Forward	Class I
O00267	1	Transcription elongation factor SPT5 OS=Homo sapiens GN=SUPT5H PE=1 SV=1 - [SPT5H_HUMAN]	O00267	S666	Transcription elongation factor SPT5 (hSPT5) (DRB sensitivity-inducing factor 160 kDa subunit) (DSIF p160) (DRB sensitivity-inducing factor large subunit) (DSIF large subunit) (Tat-cotransactivator 1 protein) (Tat-CT1 protein)	SUPT5H SPT5 SPT5H	VGGFAPMSPRISSPM	CMGC/CDK	CDK7, CDK9	DVTNFTVGGFAPMpSPR	1	T(3): 0.0; T(6): 0.0; S(14): 100.0	336	Forward	Class I
O00267	1	Transcription elongation factor SPT5 OS=Homo sapiens GN=SUPT5H PE=1 SV=1 - [SPT5H_HUMAN]	O00267	T806	Transcription elongation factor SPT5 (hSPT5) (DRB sensitivity-inducing factor 160 kDa subunit) (DSIF p160) (DRB sensitivity-inducing factor large subunit) (DSIF large subunit) (Tat-cotransactivator 1 protein) (Tat-CT1 protein)	SUPT5H SPT5 SPT5H	TPHYGSQTPLHDGSR	CMGC/CDK	CDK7, CDK9	TPHYGSQpTPLHDGSR	1	T(1): 0.0; Y(4): 0.0; S(6): 0.0; T(8): 100.0; S(14): 0.0	384	Forward	Class I
O00273	1	DNA fragmentation factor subunit alpha OS=Homo sapiens GN=DFFA PE=1 SV=1 - [DFFA_HUMAN]	O00273	S28	DNA fragmentation factor subunit alpha (DNA fragmentation factor 45 kDa subunit) (DFF-45) (Inhibitor of CAD) (ICAD)	DFFA DFF1 DFF45 H13	CLLRRNYSREQHGVA			NYpSREQHGVAASCLEDLR	1	Y(2): 7.0; S(3): 93.0; S(12): 0.0	124	Forward	Class I
O00273	1	DNA fragmentation factor subunit alpha OS=Homo sapiens GN=DFFA PE=1 SV=1 - [DFFA_HUMAN]	O00273	S239	DNA fragmentation factor subunit alpha (DNA fragmentation factor 45 kDa subunit) (DFF-45) (Inhibitor of CAD) (ICAD)	DFFA DFF1 DFF45 H13	SSDVALASHILTALR			ETSpSDVALApSHILTALR	2	T(2): 35.4; S(3): 35.4; S(4): 35.4; S(10): 93.3; T(14): 0.5	71	Forward	Class I
O00273	1	DNA fragmentation factor subunit alpha OS=Homo sapiens GN=DFFA PE=1 SV=1 - [DFFA_HUMAN]	O00273	S315	DNA fragmentation factor subunit alpha (DNA fragmentation factor 45 kDa subunit) (DFF-45) (Inhibitor of CAD) (ICAD)	DFFA DFF1 DFF45 H13	SISASKASPPGDLQN	CMGC/CDK/CDC2	CDC2	SISASKApSPPGDLQNPK	1	S(1): 0.0; S(3): 0.0; S(5): 0.0; S(8): 100.0	308	Forward	Class I
O00299	1	Chloride intracellular channel protein 1 OS=Homo sapiens GN=CLIC1 PE=1 SV=4 - [CLIC1_HUMAN]	O00299	S156	Chloride intracellular channel protein 1 (Chloride channel ABP) (Nuclear chloride ion channel 27) (NCC27) (Regulatory nuclear chloride ion channel protein) (hRNCC)	CLIC1 G6 NCC27	PEEVDETSAEDEGVS			VLDNYLTSPLPEEVDETpSAEDEGVSQRK	1	Y(5): 0.0; T(7): 0.0; S(8): 0.0; T(17): 1.2; S(18): 98.8; S(25): 0.0	236	Forward	Class I
O00303	1	Eukaryotic translation initiation factor 3 subunit F OS=Homo sapiens GN=EIF3F PE=1 SV=1 - [EIF3F_HUMAN]	O00303	S258	Eukaryotic translation initiation factor 3 subunit F (eIF3f) (Deubiquitinating enzyme eIF3f) (EC 3.4.19.12) (Eukaryotic translation initiation factor 3 subunit 5) (eIF-3-epsilon) (eIF3 p47)	EIF3F EIF3S5	LIMKTCFSPNRVIGL			TCFpSPNRVIGLSSDLQQVGGASAR	1	T(1): 0.0; S(4): 100.0; S(12): 0.0; S(13): 0.0; S(22): 0.0	236	Forward	Class I
O00308	1	NEDD4-like E3 ubiquitin-protein ligase WWP2 OS=Homo sapiens GN=WWP2 PE=1 SV=2 - [WWP2_HUMAN]	O00308	T203	NEDD4-like E3 ubiquitin-protein ligase WWP2 (EC 6.3.2.-) (Atrophin-1-interacting protein 2) (AIP2) (WW domain-containing protein 2)	WWP2	HSGASARTTPATGEQ			pTTPATGEQSPGAR	1	T(1): 96.6; T(2): 1.1; T(5): 1.1; S(9): 1.1	32	Forward	Class I
O00308	1	NEDD4-like E3 ubiquitin-protein ligase WWP2 OS=Homo sapiens GN=WWP2 PE=1 SV=2 - [WWP2_HUMAN]	O00308	S211	NEDD4-like E3 ubiquitin-protein ligase WWP2 (EC 6.3.2.-) (Atrophin-1-interacting protein 2) (AIP2) (WW domain-containing protein 2)	WWP2	TPATGEQSPGARSRH			TTPATGEQpSPGAR	1	T(1): 0.0; T(2): 0.0; T(5): 0.0; S(9): 100.0	251	Forward	Class I
O00401	1	Neural Wiskott-Aldrich syndrome protein OS=Homo sapiens GN=WASL PE=1 SV=2 - [WASL_HUMAN]	O00401	Y256	Neural Wiskott-Aldrich syndrome protein (N-WASP)	WASL	RETSKVIYDFIEKTG			VIpYDFIEK	1	Y(3): 100.0	145	Forward	Class I
O00401	1	Neural Wiskott-Aldrich syndrome protein OS=Homo sapiens GN=WASL PE=1 SV=2 - [WASL_HUMAN]	O00401	S426	Neural Wiskott-Aldrich syndrome protein (N-WASP)	WASL	LKKVEQNSRPVSCSG			KVEQNpSRPVpSCSGR	2	S(6): 100.0; S(10): 99.7; S(12): 0.3	181	Forward	Class I
O00401	1	Neural Wiskott-Aldrich syndrome protein OS=Homo sapiens GN=WASL PE=1 SV=2 - [WASL_HUMAN]	O00401	S430	Neural Wiskott-Aldrich syndrome protein (N-WASP)	WASL	EQNSRPVSCSGRDAL			KVEQNSRPVpSCSGR	1	S(6): 0.0; S(10): 100.0; S(12): 0.0	343	Forward	Class I
O00409	1	Forkhead box protein N3 OS=Homo sapiens GN=FOXN3 PE=1 SV=1 - [FOXN3_HUMAN]	O00409	S85	Forkhead box protein N3 (Checkpoint suppressor 1)	FOXN3 C14orf116 CHES1	ESVLRSVSPVQDLDD	CMGC/CDK/CDC2	CDC2	SVpSPVQDLDDDTPPSPAHSDMPYDAR	1	S(1): 1.1; S(3): 98.9; T(12): 0.0; S(15): 0.0; S(19): 0.0; Y(23): 0.0	281	Forward	Class I
O00409	1	Forkhead box protein N3 OS=Homo sapiens GN=FOXN3 PE=1 SV=1 - [FOXN3_HUMAN]	O00409	S349	Forkhead box protein N3 (Checkpoint suppressor 1)	FOXN3 C14orf116 CHES1	SSNARSTSPTSDSIS			STpSPTSDSISSSSSSADDHYEFATK	1	S(1): 0.4; T(2): 0.4; S(3): 98.3; T(5): 0.4; S(6): 0.4; S(8): 0.0; S(10): 0.0; S(11): 0.0; S(12): 0.0; S(13): 0.0; S(14): 0.0; S(15): 0.0; Y(20): 0.0; T(24): 0.0	178	Forward	Class I
O00418	1	Elongation factor 2 kinase OS=Homo sapiens GN=EEF2K PE=1 SV=1 - [EF2K_HUMAN]	O00418	S18	Eukaryotic elongation factor 2 kinase (eEF-2 kinase) (eEF-2K) (EC 2.7.11.20) (Calcium/calmodulin-dependent eukaryotic elongation factor 2 kinase)	EEF2K	EGVDGGQSPRAGHDG	CMGC/MAPK	Erk1, Erk2, JNK2, p38a, p38b, p38d, p38g	LEGVDGGQpSPR	1	S(9): 100.0	144	Forward	Class I
O00418	1	Elongation factor 2 kinase OS=Homo sapiens GN=EEF2K PE=1 SV=1 - [EF2K_HUMAN]	O00418	S71	Eukaryotic elongation factor 2 kinase (eEF-2 kinase) (eEF-2K) (EC 2.7.11.20) (Calcium/calmodulin-dependent eukaryotic elongation factor 2 kinase)	EEF2K	TKSERYSSSGSPANS			YSpSpSGSPANSFHFK	2	Y(1): 1.6; S(2): 1.6; S(3): 97.8; S(4): 97.8; S(6): 1.1; S(10): 0.0	142	Forward	Class I
O00418	1	Elongation factor 2 kinase OS=Homo sapiens GN=EEF2K PE=1 SV=1 - [EF2K_HUMAN]	O00418	S72	Eukaryotic elongation factor 2 kinase (eEF-2 kinase) (eEF-2K) (EC 2.7.11.20) (Calcium/calmodulin-dependent eukaryotic elongation factor 2 kinase)	EEF2K	KSERYSSSGSPANSF	CMGC/GSK	GSK3A	YSSpSGpSPANSFHFK	2	Y(1): 0.0; S(2): 0.0; S(3): 0.0; S(4): 100.0; S(6): 100.0; S(10): 0.0	270	Forward	Class I
O00418	1	Elongation factor 2 kinase OS=Homo sapiens GN=EEF2K PE=1 SV=1 - [EF2K_HUMAN]	O00418	S74	Eukaryotic elongation factor 2 kinase (eEF-2 kinase) (eEF-2K) (EC 2.7.11.20) (Calcium/calmodulin-dependent eukaryotic elongation factor 2 kinase)	EEF2K	ERYSSSGSPANSFHF	CMGC/CDK/CDC2	CDC2	YSSSGpSPANSFHFK	1	Y(1): 0.0; S(2): 0.0; S(3): 0.0; S(4): 0.0; S(6): 100.0; S(10): 0.0	373	Forward	Class I
O00418	1	Elongation factor 2 kinase OS=Homo sapiens GN=EEF2K PE=1 SV=1 - [EF2K_HUMAN]	O00418	S78	Eukaryotic elongation factor 2 kinase (eEF-2 kinase) (eEF-2K) (EC 2.7.11.20) (Calcium/calmodulin-dependent eukaryotic elongation factor 2 kinase)	EEF2K	SSGSPANSFHFKEAW	CAMK/CAMKL/AMPK	AMPKa1, AMPKa2	YSSpSGSPANpSFHFK	2	Y(1): 0.0; S(2): 0.0; S(3): 0.8; S(4): 91.2; S(6): 8.7; S(10): 99.2	99	Forward	Class I
O00418	1	Elongation factor 2 kinase OS=Homo sapiens GN=EEF2K PE=1 SV=1 - [EF2K_HUMAN]	O00418	T348	Eukaryotic elongation factor 2 kinase (eEF-2 kinase) (eEF-2K) (EC 2.7.11.20) (Calcium/calmodulin-dependent eukaryotic elongation factor 2 kinase)	EEF2K	KLLQSAKTILRGTEE			LLQSAKpTILRGTEEK	1	S(4): 0.0; T(7): 100.0; T(12): 0.0	373	Forward	Class I
O00418	1	Elongation factor 2 kinase OS=Homo sapiens GN=EEF2K PE=1 SV=1 - [EF2K_HUMAN]	O00418	S445	Eukaryotic elongation factor 2 kinase (eEF-2 kinase) (eEF-2K) (EC 2.7.11.20) (Calcium/calmodulin-dependent eukaryotic elongation factor 2 kinase)	EEF2K	SGDSGYPSEKRGELD	Other/CK2	CK2a2	ESENSGDSGYPpSEKRGELDDPEPR	1	S(2): 0.0; S(5): 0.0; S(8): 0.1; Y(10): 2.2; S(12): 97.8	189	Forward	Class I
O00418	1	Elongation factor 2 kinase OS=Homo sapiens GN=EEF2K PE=1 SV=1 - [EF2K_HUMAN]	O00418	S470	Eukaryotic elongation factor 2 kinase (eEF-2 kinase) (eEF-2K) (EC 2.7.11.20) (Calcium/calmodulin-dependent eukaryotic elongation factor 2 kinase)	EEF2K	YSNRKYESDEDSLGS	Other/CK2	CK2a2	KYEpSDEDSLGSSGR	1	Y(2): 0.0; S(4): 100.0; S(8): 0.0; S(11): 0.0; S(12): 0.0	374	Forward	Class I
O00418	1	Elongation factor 2 kinase OS=Homo sapiens GN=EEF2K PE=1 SV=1 - [EF2K_HUMAN]	O00418	S474	Eukaryotic elongation factor 2 kinase (eEF-2 kinase) (eEF-2K) (EC 2.7.11.20) (Calcium/calmodulin-dependent eukaryotic elongation factor 2 kinase)	EEF2K	KYESDEDSLGSSGRV	Other/CK2	CK2a2	KYEpSDEDpSLGSSGR	2	Y(2): 0.0; S(4): 100.0; S(8): 100.0; S(11): 0.0; S(12): 0.0	291	Forward	Class I
O00423	1	Echinoderm microtubule-associated protein-like 1 OS=Homo sapiens GN=EML1 PE=2 SV=2 - [EMAL1_HUMAN]	O00423	S113	Echinoderm microtubule-associated protein-like 1 (EMAP-1) (HuEMAP-1)	EML1 EMAP1 EMAPL EMAPL1	KPTGSLPSPSGVRKE			KPTGSLPpSPSGVRK	1	T(3): 0.0; S(5): 0.0; S(8): 100.0; S(10): 0.0	312	Forward	Class I
O00423	1	Echinoderm microtubule-associated protein-like 1 OS=Homo sapiens GN=EML1 PE=2 SV=2 - [EMAL1_HUMAN]	O00423	S115	Echinoderm microtubule-associated protein-like 1 (EMAP-1) (HuEMAP-1)	EML1 EMAP1 EMAPL EMAPL1	TGSLPSPSGVRKETA			KPTGSLPSPpSGVRK	1	T(3): 0.0; S(5): 0.0; S(8): 0.1; S(10): 99.9	67	Forward	Class I
O00425	1	Insulin-like growth factor 2 mRNA-binding protein 3 OS=Homo sapiens GN=IGF2BP3 PE=1 SV=1 - [IF2B3_HUMAN]	O00425	T528	Insulin-like growth factor 2 mRNA-binding protein 3 (IGF2 mRNA-binding protein 3) (IMP-3) (IGF-II mRNA-binding protein 3) (KH domain-containing protein overexpressed in cancer) (hKOC) (VICKZ family member 3)	IGF2BP3 IMP3 KOC1 VICKZ3	VVVPRDQTPDENDQV			DQpTPDENDQVVVK	1	T(3): 100.0	239	Forward	Class I
O00429	1	Dynamin-1-like protein OS=Homo sapiens GN=DNM1L PE=1 SV=2 - [DNM1L_HUMAN]	O00429	S616	Dynamin-1-like protein (EC 3.6.5.5) (Dnm1p/Vps1p-like protein) (DVLP) (Dynamin family member proline-rich carboxyl-terminal domain less) (Dymple) (Dynamin-like protein) (Dynamin-like protein 4) (Dynamin-like protein IV) (HdynIV) (Dynamin-related protein 1)	DNM1L DLP1 DRP1	PIPIMPASPQKGHAV			SKPIPIMPApSPQK	1	S(1): 0.0; S(10): 100.0	230	Forward	Class I
O00443	1	Phosphatidylinositol-4-phosphate 3-kinase C2 domain-containing alpha polypeptide OS=Homo sapiens GN=PIK3C2A PE=1 SV=2 - [P3C2A_HUMAN]	O00443	S59	Phosphatidylinositol 4-phosphate 3-kinase C2 domain-containing subunit alpha (PI3K-C2-alpha) (PtdIns-3-kinase C2 subunit alpha) (EC 2.7.1.154) (Phosphoinositide 3-kinase-C2-alpha)	PIK3C2A	QRGFELSSSTRKKAQ			GFELSpSSTR	1	S(5): 3.5; S(6): 92.7; S(7): 3.5; T(8): 0.2	95	Forward	Class I
O00443	1	Phosphatidylinositol-4-phosphate 3-kinase C2 domain-containing alpha polypeptide OS=Homo sapiens GN=PIK3C2A PE=1 SV=2 - [P3C2A_HUMAN]	O00443	S259	Phosphatidylinositol 4-phosphate 3-kinase C2 domain-containing subunit alpha (PI3K-C2-alpha) (PtdIns-3-kinase C2 subunit alpha) (EC 2.7.1.154) (Phosphoinositide 3-kinase-C2-alpha)	PIK3C2A	KVSNLQVSPKSEDIS	Atypical/PIKK/FRAP	FRAP	VSNLQVpSPK	1	S(2): 0.0; S(7): 100.0	100	Forward	Class I
O00443	1	Phosphatidylinositol-4-phosphate 3-kinase C2 domain-containing alpha polypeptide OS=Homo sapiens GN=PIK3C2A PE=1 SV=2 - [P3C2A_HUMAN]	O00443	S336	Phosphatidylinositol 4-phosphate 3-kinase C2 domain-containing subunit alpha (PI3K-C2-alpha) (PtdIns-3-kinase C2 subunit alpha) (EC 2.7.1.154) (Phosphoinositide 3-kinase-C2-alpha)	PIK3C2A	SVATVTRSQSLNIRT			pSQSLNIR	1	S(1): 99.3; S(3): 0.7	104	Forward	Class I
O00443	1	Phosphatidylinositol-4-phosphate 3-kinase C2 domain-containing alpha polypeptide OS=Homo sapiens GN=PIK3C2A PE=1 SV=2 - [P3C2A_HUMAN]	O00443	S338	Phosphatidylinositol 4-phosphate 3-kinase C2 domain-containing subunit alpha (PI3K-C2-alpha) (PtdIns-3-kinase C2 subunit alpha) (EC 2.7.1.154) (Phosphoinositide 3-kinase-C2-alpha)	PIK3C2A	ATVTRSQSLNIRTTQ	AGC/PKC	PKCa, PKCb, PKCz	SQpSLNIR	1	S(1): 0.4; S(3): 99.6	117	Forward	Class I
O00461	1	Golgi integral membrane protein 4 OS=Homo sapiens GN=GOLIM4 PE=1 SV=1 - [GOLI4_HUMAN]	O00461	Y641	Golgi integral membrane protein 4 (Golgi integral membrane protein, cis) (GIMPc) (Golgi phosphoprotein 4) (Golgi-localized phosphoprotein of 130 kDa) (Golgi phosphoprotein of 130 kDa)	GOLIM4 GIMPC GOLPH4 GPP130	EHNAEETYGENDENT			ELEHNAEETpYGENDENTDDKNNDGEEQEVRDDNRPK	1	T(9): 18.6; Y(10): 80.2; T(17): 1.2	62	Forward	Class I
O00471	1	Exocyst complex component 5 OS=Homo sapiens GN=EXOC5 PE=2 SV=1 - [EXOC5_HUMAN]	O00471	S266	Exocyst complex component 5 (Exocyst complex component Sec10) (hSec10)	EXOC5 SEC10 SEC10L1	KQVGDIFSNPETVLA			QVGDIFpSNPETVLAK	1	S(7): 100.0; T(11): 0.0	124	Forward	Class I
O00499	1	Myc box-dependent-interacting protein 1 OS=Homo sapiens GN=BIN1 PE=1 SV=1 - [BIN1_HUMAN]	O00499	S296	Myc box-dependent-interacting protein 1 (Amphiphysin II) (Amphiphysin-like protein) (Box-dependent myc-interacting protein 1) (Bridging integrator 1)	BIN1 AMPHL	APAKGNKSPSPPDGS	CMGC	CLK1	GNKpSPSPPDGSPAATPEIR	1	S(4): 100.0; S(6): 0.0; S(11): 0.0; T(15): 0.0	293	Forward	Class I
O00499	1	Myc box-dependent-interacting protein 1 OS=Homo sapiens GN=BIN1 PE=1 SV=1 - [BIN1_HUMAN]	O00499	S298	Myc box-dependent-interacting protein 1 (Amphiphysin II) (Amphiphysin-like protein) (Box-dependent myc-interacting protein 1) (Bridging integrator 1)	BIN1 AMPHL	AKGNKSPSPPDGSPA	CMGC	CLK1	GNKSPpSPPDGpSPAATPEIR	2	S(4): 0.0; S(6): 100.0; S(11): 100.0; T(15): 0.0	285	Forward	Class I
O00499	1	Myc box-dependent-interacting protein 1 OS=Homo sapiens GN=BIN1 PE=1 SV=1 - [BIN1_HUMAN]	O00499	S303	Myc box-dependent-interacting protein 1 (Amphiphysin II) (Amphiphysin-like protein) (Box-dependent myc-interacting protein 1) (Bridging integrator 1)	BIN1 AMPHL	SPSPPDGSPAATPEI	CMGC	CLK1	GNKSPpSPPDGpSPAATPEIR	2	S(4): 0.0; S(6): 100.0; S(11): 100.0; T(15): 0.0	285	Forward	Class I
O00499	1	Myc box-dependent-interacting protein 1 OS=Homo sapiens GN=BIN1 PE=1 SV=1 - [BIN1_HUMAN]	O00499	S331	Myc box-dependent-interacting protein 1 (Amphiphysin II) (Amphiphysin-like protein) (Box-dependent myc-interacting protein 1) (Bridging integrator 1)	BIN1 AMPHL	PGATLPKSPSQLRKG	CMGC	CLK1	VNHEPEPAGGATPGATLPKpSPSQLR	1	T(12): 0.0; T(16): 0.0; S(20): 99.9; S(22): 0.0	192	Forward	Class I
O00499	1	Myc box-dependent-interacting protein 1 OS=Homo sapiens GN=BIN1 PE=1 SV=1 - [BIN1_HUMAN]	O00499	S333	Myc box-dependent-interacting protein 1 (Amphiphysin II) (Amphiphysin-like protein) (Box-dependent myc-interacting protein 1) (Bridging integrator 1)	BIN1 AMPHL	ATLPKSPSQLRKGPP	Atypical/PIKK/DNAPK	DNAPK	VNHEPEPAGGATPGATLPKSPpSQLRK	1	T(12): 0.0; T(16): 0.0; S(20): 0.0; S(22): 99.9	204	Forward	Class I
O00501	1	Claudin-5 OS=Homo sapiens GN=CLDN5 PE=1 SV=1 - [CLD5_HUMAN]	O00501	T207	Claudin-5 (Transmembrane protein deleted in VCFS) (TMDVCF)	CLDN5 AWAL TMVCF	YSAPRRPTATGDYDK			RPpTATGDYDKK	1	T(3): 100.0; T(5): 0.0; Y(8): 0.0	273	Forward	Class I
O00505	1	Importin subunit alpha-3 OS=Homo sapiens GN=KPNA3 PE=1 SV=2 - [IMA3_HUMAN]	O00505	S56	Importin subunit alpha-3 (Importin alpha Q2) (Qip2) (Karyopherin subunit alpha-3) (SRP1-gamma)	KPNA3 QIP2	RNVPQEESLEDSDVD	CAMK/PKD	PKD3	NVPQEEpSLEDSDVDADFK	1	S(7): 100.0; S(11): 0.0	208	Forward	Class I
O00505	1	Importin subunit alpha-3 OS=Homo sapiens GN=KPNA3 PE=1 SV=2 - [IMA3_HUMAN]	O00505	S60	Importin subunit alpha-3 (Importin alpha Q2) (Qip2) (Karyopherin subunit alpha-3) (SRP1-gamma)	KPNA3 QIP2	QEESLEDSDVDADFK			NVPQEESLEDpSDVDADFK	1	S(7): 0.0; S(11): 100.0	374	Forward	Class I
O00506	1	Serine/threonine-protein kinase 25 OS=Homo sapiens GN=STK25 PE=1 SV=1 - [STK25_HUMAN]	O00506	T174	Serine/threonine-protein kinase 25 (EC 2.7.11.1) (Ste20-like kinase) (Sterile 20/oxidant stress-response kinase 1) (SOK-1) (Ste20/oxidant stress response kinase 1)	STK25 SOK1 YSK1	DTQIKRNTFVGTPFW	CAMK/CAMKL/LKB	LKB1	RNpTFVGTPFWMAPEVIK	1	T(3): 100.0; T(7): 0.0	326	Forward	Class I
O00512	1	B-cell CLL/lymphoma 9 protein OS=Homo sapiens GN=BCL9 PE=1 SV=4 - [BCL9_HUMAN]	O00512	T155	B-cell CLL/lymphoma 9 protein (B-cell lymphoma 9 protein) (Bcl-9) (Protein legless homolog)	BCL9	ATAPRSSTPSHGQTT	Atypical/PIKK/FRAP	FRAP	SSpTPSHGQTTATEPTPAQK	1	S(1): 0.0; S(2): 0.0; T(3): 100.0; S(5): 0.0; T(9): 0.0; T(10): 0.0; T(12): 0.0; T(15): 0.0	348	Forward	Class I
O00512	1	B-cell CLL/lymphoma 9 protein OS=Homo sapiens GN=BCL9 PE=1 SV=4 - [BCL9_HUMAN]	O00512	T315	B-cell CLL/lymphoma 9 protein (B-cell lymphoma 9 protein) (Bcl-9) (Protein legless homolog)	BCL9	TPNNRAVTPVSQGSN	Atypical/PIKK/FRAP	FRAP	AVpTPVSQGSNSSSADPK	1	T(3): 100.0; S(6): 0.0; S(9): 0.0; S(11): 0.0; S(12): 0.0; S(13): 0.0	301	Forward	Class I
O00512	1	B-cell CLL/lymphoma 9 protein OS=Homo sapiens GN=BCL9 PE=1 SV=4 - [BCL9_HUMAN]	O00512	S687	B-cell CLL/lymphoma 9 protein (B-cell lymphoma 9 protein) (Bcl-9) (Protein legless homolog)	BCL9	IPVEGPLSPSRGDFP	Atypical/PIKK/FRAP	FRAP	IPVEGPLpSPSRGDFPK	1	S(8): 100.0; S(10): 0.0	284	Forward	Class I
O00541	1	Pescadillo homolog 1 OS=Homo sapiens GN=PES1 PE=1 SV=1 - [PESC_HUMAN]	O00541	T515	Pescadillo homolog	PES1	KPRVMAGTLKLEDKQ			KPRVMAGpTLKLEDK	1	T(8): 100.0	120	Forward	Class I
O00555	1	Voltage-dependent P/Q-type calcium channel subunit alpha-1A OS=Homo sapiens GN=CACNA1A PE=1 SV=2 - [CAC1A_HUMAN]	O00555	S2335	Voltage-dependent P/Q-type calcium channel subunit alpha-1A (Brain calcium channel I) (BI) (Calcium channel, L type, alpha-1 polypeptide isoform 4) (Voltage-gated calcium channel subunit alpha Cav2.1)	CACNA1A CACH4 CACN3 CACNL1A4	RPGRAATSGPRRYPG			AATpSGPRR	1	T(3): 1.4; S(4): 98.6	19	Forward	Class I
O00559	1	Receptor-binding cancer antigen expressed on SiSo cells OS=Homo sapiens GN=EBAG9 PE=1 SV=1 - [RCAS1_HUMAN]	O00559	S36	Receptor-binding cancer antigen expressed on SiSo cells (Cancer-associated surface antigen RCAS1) (Estrogen receptor-binding fragment-associated gene 9 protein)	EBAG9 RCAS1	SGRGRKLSGDQITLP			KLpSGDQITLPTTVDYSSVPK	1	S(3): 100.0; T(8): 0.0; T(11): 0.0; T(12): 0.0; Y(15): 0.0; S(16): 0.0; S(17): 0.0	296	Forward	Class I
O00567	1	Nucleolar protein 5A OS=Homo sapiens GN=NOL5A PE=1 SV=4 - [NOL5A_HUMAN]	O00567	S511	Nucleolar protein 56 (Nucleolar protein 5A)	NOP56 NOL5A	SKPKKKKSFSKEELM	TKL/STKR	BMPR2	pSFpSKEELMSSDLEETAGSTSIPK	2	S(1): 76.2; S(3): 76.2; S(9): 21.6; S(10): 21.6; T(15): 3.8; S(18): 0.4; T(19): 0.2; S(20): 0.1	32	Forward	Class I
O00567	1	Nucleolar protein 5A OS=Homo sapiens GN=NOL5A PE=1 SV=4 - [NOL5A_HUMAN]	O00567	S513	Nucleolar protein 56 (Nucleolar protein 5A)	NOP56 NOL5A	PKKKKSFSKEELMSS	Other/CK2	CK2a2	pSFpSKEELMSSDLEETAGSTSIPK	2	S(1): 76.2; S(3): 76.2; S(9): 21.6; S(10): 21.6; T(15): 3.8; S(18): 0.4; T(19): 0.2; S(20): 0.1	32	Forward	Class I
O00567	1	Nucleolar protein 5A OS=Homo sapiens GN=NOL5A PE=1 SV=4 - [NOL5A_HUMAN]	O00567	S519	Nucleolar protein 56 (Nucleolar protein 5A)	NOP56 NOL5A	FSKEELMSSDLEETA	Other/CK2	CK2a2	EELMpSSDLEETAGSTSIPK	1	S(5): 95.0; S(6): 5.0; T(11): 0.0; S(14): 0.0; T(15): 0.0; S(16): 0.0	97	Forward	Class I
O00567	1	Nucleolar protein 5A OS=Homo sapiens GN=NOL5A PE=1 SV=4 - [NOL5A_HUMAN]	O00567	S520	Nucleolar protein 56 (Nucleolar protein 5A)	NOP56 NOL5A	SKEELMSSDLEETAG	Other/CK2	CK2a2	EELMSpSDLEETAGSTSIPK	1	S(5): 0.0; S(6): 100.0; T(11): 0.0; S(14): 0.0; T(15): 0.0; S(16): 0.0	441	Forward	Class I
O00567	1	Nucleolar protein 5A OS=Homo sapiens GN=NOL5A PE=1 SV=4 - [NOL5A_HUMAN]	O00567	S528	Nucleolar protein 56 (Nucleolar protein 5A)	NOP56 NOL5A	DLEETAGSTSIPKRK			SFSKEELMSSDLEETAGpSTSIPK	1	S(1): 0.0; S(3): 0.0; S(9): 1.3; S(10): 1.3; T(15): 1.3; S(18): 94.9; T(19): 1.3; S(20): 0.0	146	Forward	Class I
O00567	1	Nucleolar protein 5A OS=Homo sapiens GN=NOL5A PE=1 SV=4 - [NOL5A_HUMAN]	O00567	S569	Nucleolar protein 56 (Nucleolar protein 5A)	NOP56 NOL5A	FSKEEPVSSGPEEAV	Other/CK2	CK2a2	FSKEEPVpSpSGPEEAVGK	2	S(2): 0.0; S(8): 100.0; S(9): 100.0	204	Forward	Class I
O00567	1	Nucleolar protein 5A OS=Homo sapiens GN=NOL5A PE=1 SV=4 - [NOL5A_HUMAN]	O00567	S570	Nucleolar protein 56 (Nucleolar protein 5A)	NOP56 NOL5A	SKEEPVSSGPEEAVG	Other/CK2	CK2a2	FSKEEPVpSpSGPEEAVGK	2	S(2): 0.0; S(8): 100.0; S(9): 100.0	204	Forward	Class I
O00571	1	ATP-dependent RNA helicase DDX3X OS=Homo sapiens GN=DDX3X PE=1 SV=3 - [DDX3X_HUMAN]	O00571	S90	ATP-dependent RNA helicase DDX3X (EC 3.6.4.13) (DEAD box protein 3, X-chromosomal) (DEAD box, X isoform) (Helicase-like protein 2) (HLP2)	DDX3X DBX DDX3	SFFSDRGSGSRGRFD			SSFFSDRGpSGSR	1	S(1): 0.0; S(2): 0.0; S(5): 0.0; S(9): 100.0; S(11): 0.0	249	Forward	Class I
O00571	1	ATP-dependent RNA helicase DDX3X OS=Homo sapiens GN=DDX3X PE=1 SV=3 - [DDX3X_HUMAN]	O00571	S594	ATP-dependent RNA helicase DDX3X (EC 3.6.4.13) (DEAD box protein 3, X-chromosomal) (DEAD box, X isoform) (Helicase-like protein 2) (HLP2)	DDX3X DBX DDX3	RSKSSRFSGGFGARD			SSRFpSGGFGAR	1	S(1): 0.0; S(2): 0.0; S(5): 100.0	330	Forward	Class I
O00571	1	ATP-dependent RNA helicase DDX3X OS=Homo sapiens GN=DDX3X PE=1 SV=3 - [DDX3X_HUMAN]	O00571	S619	ATP-dependent RNA helicase DDX3X (EC 3.6.4.13) (DEAD box protein 3, X-chromosomal) (DEAD box, X isoform) (Helicase-like protein 2) (HLP2)	DDX3X DBX DDX3	SFSSSRASSSRSGGG			QSSGASSSSFSSSRApSSSR	1	S(2): 0.0; S(3): 0.0; S(6): 0.0; S(7): 0.0; S(8): 0.0; S(9): 0.0; S(11): 0.0; S(12): 0.0; S(13): 0.0; S(16): 100.0; S(17): 0.0; S(18): 0.0	432	Forward	Class I
O00623	1	Peroxisome assembly protein 12 OS=Homo sapiens GN=PEX12 PE=1 SV=1 - [PEX12_HUMAN]	O00623	S105	Peroxisome assembly protein 12 (Peroxin-12) (Peroxisome assembly factor 3) (PAF-3)	PEX12 PAF3	HKSQRLASAGLPKQQ			SQRLApSAGLPK	1	S(1): 10.0; S(6): 90.0	37	Forward	Class I
O00629	1	Importin subunit alpha-4 OS=Homo sapiens GN=KPNA4 PE=1 SV=1 - [IMA4_HUMAN]	O00629	S60	Importin subunit alpha-4 (Importin alpha Q1) (Qip1) (Karyopherin subunit alpha-4)	KPNA4 QIP1	HEDICEDSDIDGDYR			NVPHEDICEDpSDIDGDYR	1	S(11): 100.0; Y(17): 0.0	249	Forward	Class I
O00634	1	Netrin-2-like protein OS=Homo sapiens GN=NTN2L PE=2 SV=1 - [NET2_HUMAN]	O00634	Y525	Netrin-3 (Netrin-2-like protein)	NTN3 NTN2L	RLLPGRRYLLLGGGP			pYLLLGGGPGAAAGGAGGR	1	Y(1): 100.0	88	Forward	Class I
O00712	1	Nuclear factor 1 B-type OS=Homo sapiens GN=NFIB PE=2 SV=2 - [NFIB_HUMAN]	O00712	S264	Nuclear factor 1 B-type (NF1-B) (Nuclear factor 1/B) (CCAAT-box-binding transcription factor) (CTF) (Nuclear factor I/B) (NF-I/B) (NFI-B) (TGGCA-binding protein)	NFIB	VNLQRSLSSPPSSKR			SLpSSPPSSK	1	S(1): 0.9; S(3): 98.3; S(4): 0.9; S(7): 0.0; S(8): 0.0	65	Forward	Class I
O00712	1	Nuclear factor 1 B-type OS=Homo sapiens GN=NFIB PE=2 SV=2 - [NFIB_HUMAN]	O00712	S265	Nuclear factor 1 B-type (NF1-B) (Nuclear factor 1/B) (CCAAT-box-binding transcription factor) (CTF) (Nuclear factor I/B) (NF-I/B) (NFI-B) (TGGCA-binding protein)	NFIB	NLQRSLSSPPSSKRP			SLSpSPPSSK	1	S(1): 0.0; S(3): 0.7; S(4): 99.3; S(7): 0.0; S(8): 0.0	121	Forward	Class I
O00712	1	Nuclear factor 1 B-type OS=Homo sapiens GN=NFIB PE=2 SV=2 - [NFIB_HUMAN]	O00712	S312	Nuclear factor 1 B-type (NF1-B) (Nuclear factor 1/B) (CCAAT-box-binding transcription factor) (CTF) (Nuclear factor I/B) (NF-I/B) (NFI-B) (TGGCA-binding protein)	NFIB	ERDQDMSSPTTMKKP			TWHERDQDMSpSPTTMK	1	T(1): 0.0; S(10): 0.0; S(11): 100.0; T(13): 0.0; T(14): 0.0	255	Forward	Class I
O00712	1	Nuclear factor 1 B-type OS=Homo sapiens GN=NFIB PE=2 SV=2 - [NFIB_HUMAN]	O00712	S328	Nuclear factor 1 B-type (NF1-B) (Nuclear factor 1/B) (CCAAT-box-binding transcription factor) (CTF) (Nuclear factor I/B) (NF-I/B) (NFI-B) (TGGCA-binding protein)	NFIB	KPLFSSASPQDSSPR			KPEKPLFSSApSPQDSSPR	1	S(8): 0.0; S(9): 0.0; S(11): 100.0; S(15): 0.0; S(16): 0.0	270	Forward	Class I
O00712	1	Nuclear factor 1 B-type OS=Homo sapiens GN=NFIB PE=2 SV=2 - [NFIB_HUMAN]	O00712	S333	Nuclear factor 1 B-type (NF1-B) (Nuclear factor 1/B) (CCAAT-box-binding transcription factor) (CTF) (Nuclear factor I/B) (NF-I/B) (NFI-B) (TGGCA-binding protein)	NFIB	SASPQDSSPRLSTFP			KPEKPLFSSASPQDSpSPR	1	S(8): 0.0; S(9): 0.0; S(11): 0.0; S(15): 3.1; S(16): 96.9	289	Forward	Class I
O00746	1	Nucleoside diphosphate kinase, mitochondrial OS=Homo sapiens GN=NME4 PE=1 SV=1 - [NDKM_HUMAN]	O00746	S23	Nucleoside diphosphate kinase, mitochondrial (NDK) (NDP kinase, mitochondrial) (EC 2.7.4.6) (Nucleoside diphosphate kinase D) (NDPKD) (nm23-H4)	NME4 NM23D	GPRAPGPSLLVRHGS			APGPpSLLVR	1	S(5): 100.0	94	Forward	Class I
O14497	1	AT-rich interactive domain-containing protein 1A OS=Homo sapiens GN=ARID1A PE=1 SV=3 - [ARI1A_HUMAN]	O14497	S363	AT-rich interactive domain-containing protein 1A (ARID domain-containing protein 1A) (B120) (BRG1-associated factor 250) (BAF250) (BRG1-associated factor 250a) (BAF250A) (Osa homolog 1) (hOSA1) (SWI-like protein) (SWI/SNF complex protein p270) (SWI/SNF-related, matrix-associated, actin-dependent regulator of chromatin subfamily F member 1) (hELD)	ARID1A BAF250 BAF250A C1orf4 OSA1 SMARCF1	RSHHAPMSPGSSGGG	CMGC/CDK	CDK4	SHHAPMpSPGSSGGGGQPLAR	1	S(1): 0.0; S(7): 100.0; S(10): 0.0; S(11): 0.0	341	Forward	Class I
O14497	1	AT-rich interactive domain-containing protein 1A OS=Homo sapiens GN=ARID1A PE=1 SV=3 - [ARI1A_HUMAN]	O14497	S382	AT-rich interactive domain-containing protein 1A (ARID domain-containing protein 1A) (B120) (BRG1-associated factor 250) (BAF250) (BRG1-associated factor 250a) (BAF250A) (Osa homolog 1) (hOSA1) (SWI-like protein) (SWI/SNF complex protein p270) (SWI/SNF-related, matrix-associated, actin-dependent regulator of chromatin subfamily F member 1) (hELD)	ARID1A BAF250 BAF250A C1orf4 OSA1 SMARCF1	ARTPQPSSPMDQMGK			TPQPSpSPMDQMGK	1	T(1): 0.0; S(5): 0.5; S(6): 99.5	160	Forward	Class I
O14497	1	AT-rich interactive domain-containing protein 1A OS=Homo sapiens GN=ARID1A PE=1 SV=3 - [ARI1A_HUMAN]	O14497	S696	AT-rich interactive domain-containing protein 1A (ARID domain-containing protein 1A) (B120) (BRG1-associated factor 250) (BAF250) (BRG1-associated factor 250a) (BAF250A) (Osa homolog 1) (hOSA1) (SWI-like protein) (SWI/SNF complex protein p270) (SWI/SNF-related, matrix-associated, actin-dependent regulator of chromatin subfamily F member 1) (hELD)	ARID1A BAF250 BAF250A C1orf4 OSA1 SMARCF1	LPGIRGPSPSPVGSP	CMGC/CDK	CDK4	GPpSPSPVGSPASVAQSR	1	S(3): 100.0; S(5): 0.0; S(9): 0.0; S(12): 0.0; S(16): 0.0	251	Forward	Class I
O14497	1	AT-rich interactive domain-containing protein 1A OS=Homo sapiens GN=ARID1A PE=1 SV=3 - [ARI1A_HUMAN]	O14497	S698	AT-rich interactive domain-containing protein 1A (ARID domain-containing protein 1A) (B120) (BRG1-associated factor 250) (BAF250) (BRG1-associated factor 250a) (BAF250A) (Osa homolog 1) (hOSA1) (SWI-like protein) (SWI/SNF complex protein p270) (SWI/SNF-related, matrix-associated, actin-dependent regulator of chromatin subfamily F member 1) (hELD)	ARID1A BAF250 BAF250A C1orf4 OSA1 SMARCF1	GIRGPSPSPVGSPAS	CMGC/CDK	CDK4	GPpSPpSPVGSPASVAQSR	2	S(3): 100.0; S(5): 99.6; S(9): 0.4; S(12): 0.0; S(16): 0.0	97	Forward	Class I
O14497	1	AT-rich interactive domain-containing protein 1A OS=Homo sapiens GN=ARID1A PE=1 SV=3 - [ARI1A_HUMAN]	O14497	S702	AT-rich interactive domain-containing protein 1A (ARID domain-containing protein 1A) (B120) (BRG1-associated factor 250) (BAF250) (BRG1-associated factor 250a) (BAF250A) (Osa homolog 1) (hOSA1) (SWI-like protein) (SWI/SNF complex protein p270) (SWI/SNF-related, matrix-associated, actin-dependent regulator of chromatin subfamily F member 1) (hELD)	ARID1A BAF250 BAF250A C1orf4 OSA1 SMARCF1	PSPSPVGSPASVAQS	CMGC/CDK	CDK4	GPpSPSPVGpSPASVAQSR	2	S(3): 100.0; S(5): 0.5; S(9): 99.5; S(12): 0.0; S(16): 0.0	121	Forward	Class I
O14497	1	AT-rich interactive domain-containing protein 1A OS=Homo sapiens GN=ARID1A PE=1 SV=3 - [ARI1A_HUMAN]	O14497	S772	AT-rich interactive domain-containing protein 1A (ARID domain-containing protein 1A) (B120) (BRG1-associated factor 250) (BAF250) (BRG1-associated factor 250a) (BAF250A) (Osa homolog 1) (hOSA1) (SWI-like protein) (SWI/SNF complex protein p270) (SWI/SNF-related, matrix-associated, actin-dependent regulator of chromatin subfamily F member 1) (hELD)	ARID1A BAF250 BAF250A C1orf4 OSA1 SMARCF1	PQPGSALSPRQPSGG	CMGC/CDK	CDK4	NPQMPQYSSPQPGSALpSPR	1	Y(7): 0.0; S(8): 0.0; S(9): 0.0; S(14): 0.0; S(17): 100.0	256	Forward	Class I
O14497	1	AT-rich interactive domain-containing protein 1A OS=Homo sapiens GN=ARID1A PE=1 SV=3 - [ARI1A_HUMAN]	O14497	S1184	AT-rich interactive domain-containing protein 1A (ARID domain-containing protein 1A) (B120) (BRG1-associated factor 250) (BAF250) (BRG1-associated factor 250a) (BAF250A) (Osa homolog 1) (hOSA1) (SWI-like protein) (SWI/SNF complex protein p270) (SWI/SNF-related, matrix-associated, actin-dependent regulator of chromatin subfamily F member 1) (hELD)	ARID1A BAF250 BAF250A C1orf4 OSA1 SMARCF1	PGMSRSNSVGIQDAF			SNpSVGIQDAFNDGSDSTFQK	1	S(1): 0.3; S(3): 99.7; S(14): 0.0; S(16): 0.0; T(17): 0.0	391	Forward	Class I
O14497	1	AT-rich interactive domain-containing protein 1A OS=Homo sapiens GN=ARID1A PE=1 SV=3 - [ARI1A_HUMAN]	O14497	S1751	AT-rich interactive domain-containing protein 1A (ARID domain-containing protein 1A) (B120) (BRG1-associated factor 250) (BAF250) (BRG1-associated factor 250a) (BAF250A) (Osa homolog 1) (hOSA1) (SWI-like protein) (SWI/SNF complex protein p270) (SWI/SNF-related, matrix-associated, actin-dependent regulator of chromatin subfamily F member 1) (hELD)	ARID1A BAF250 BAF250A C1orf4 OSA1 SMARCF1	LLDPGRFSKVSSPAP			TLLDPGRFpSK	1	T(1): 0.0; S(9): 100.0	173	Forward	Class I
O14497	1	AT-rich interactive domain-containing protein 1A OS=Homo sapiens GN=ARID1A PE=1 SV=3 - [ARI1A_HUMAN]	O14497	S1755	AT-rich interactive domain-containing protein 1A (ARID domain-containing protein 1A) (B120) (BRG1-associated factor 250) (BAF250) (BRG1-associated factor 250a) (BAF250A) (Osa homolog 1) (hOSA1) (SWI-like protein) (SWI/SNF complex protein p270) (SWI/SNF-related, matrix-associated, actin-dependent regulator of chromatin subfamily F member 1) (hELD)	ARID1A BAF250 BAF250A C1orf4 OSA1 SMARCF1	GRFSKVSSPAPMEGG	CMGC/CDK	CDK4	VSpSPAPMEGGEEEEELLGPK	1	S(2): 6.7; S(3): 93.3	87	Forward	Class I
O14497	1	AT-rich interactive domain-containing protein 1A OS=Homo sapiens GN=ARID1A PE=1 SV=3 - [ARI1A_HUMAN]	O14497	S1944	AT-rich interactive domain-containing protein 1A (ARID domain-containing protein 1A) (B120) (BRG1-associated factor 250) (BAF250) (BRG1-associated factor 250a) (BAF250A) (Osa homolog 1) (hOSA1) (SWI-like protein) (SWI/SNF complex protein p270) (SWI/SNF-related, matrix-associated, actin-dependent regulator of chromatin subfamily F member 1) (hELD)	ARID1A BAF250 BAF250A C1orf4 OSA1 SMARCF1	SKFPFGISPAQSHRN	CMGC/CDK	CDK4	ESSKFPFGIpSPAQSHR	1	S(2): 0.0; S(3): 0.0; S(10): 100.0; S(14): 0.0	235	Forward	Class I
O14523	1	C2 domain-containing protein 2-like OS=Homo sapiens GN=C2CD2L PE=1 SV=3 - [C2C2L_HUMAN]	O14523	S662	C2 domain-containing protein 2-like (Transmembrane protein 24)	C2CD2L KIAA0285 TMEM24 DLNB23	KEAGLSQSHDDLSNA			EAGLSQpSHDDLSNATATPSVRK	1	S(5): 0.3; S(7): 99.7; S(12): 0.0; T(15): 0.0; T(17): 0.0; S(19): 0.0	234	Forward	Class I
O14523	1	C2 domain-containing protein 2-like OS=Homo sapiens GN=C2CD2L PE=1 SV=3 - [C2C2L_HUMAN]	O14523	S703	C2 domain-containing protein 2-like (Transmembrane protein 24)	C2CD2L KIAA0285 TMEM24 DLNB23	PKANGNPSPQL****			ANGNPpSPQL	1	S(6): 100.0	66	Forward	Class I
O14545	1	TRAF-type zinc finger domain-containing protein 1 OS=Homo sapiens GN=TRAFD1 PE=1 SV=1 - [TRAD1_HUMAN]	O14545	S278	TRAF-type zinc finger domain-containing protein 1 (Protein FLN29)	TRAFD1 FLN29	QSHGGPRSLSDIKGA			AVCEADQSHGGPRpSLSDIK	1	S(8): 0.0; S(14): 100.0; S(16): 0.0	255	Forward	Class I
O14545	1	TRAF-type zinc finger domain-containing protein 1 OS=Homo sapiens GN=TRAFD1 PE=1 SV=1 - [TRAD1_HUMAN]	O14545	T323	TRAF-type zinc finger domain-containing protein 1 (Protein FLN29)	TRAFD1 FLN29	RALPSLNTGSSSPRG			ALPSLNpTGSSSPR	1	S(4): 0.3; T(7): 86.3; S(9): 4.5; S(10): 4.5; S(11): 4.5	72	Forward	Class I
O14545	1	TRAF-type zinc finger domain-containing protein 1 OS=Homo sapiens GN=TRAFD1 PE=1 SV=1 - [TRAD1_HUMAN]	O14545	S327	TRAF-type zinc finger domain-containing protein 1 (Protein FLN29)	TRAFD1 FLN29	SLNTGSSSPRGVEEP			ALPSLNTGSSpSPR	1	S(4): 0.0; T(7): 0.0; S(9): 0.0; S(10): 0.0; S(11): 100.0	201	Forward	Class I
O14545	1	TRAF-type zinc finger domain-containing protein 1 OS=Homo sapiens GN=TRAFD1 PE=1 SV=1 - [TRAD1_HUMAN]	O14545	T414	TRAF-type zinc finger domain-containing protein 1 (Protein FLN29)	TRAFD1 FLN29	LDSQPQETSPELPRR			LDSQPQEpTSPELPR	1	S(3): 0.0; T(8): 99.3; S(9): 0.7	213	Forward	Class I
O14545	1	TRAF-type zinc finger domain-containing protein 1 OS=Homo sapiens GN=TRAFD1 PE=1 SV=1 - [TRAD1_HUMAN]	O14545	S415	TRAF-type zinc finger domain-containing protein 1 (Protein FLN29)	TRAFD1 FLN29	DSQPQETSPELPRRR			LDSQPQETpSPELPR	1	S(3): 0.0; T(8): 0.0; S(9): 100.0	318	Forward	Class I
O14558	1	Heat shock protein beta-6 OS=Homo sapiens GN=HSPB6 PE=1 SV=2 - [HSPB6_HUMAN]	O14558	S16	Heat shock protein beta-6 (HspB6) (Heat shock 20 kDa-like protein p20)	HSPB6	PSWLRRASAPLPGLS			RApSAPLPGLSAPGR	1	S(3): 100.0; S(10): 0.0	97	Forward	Class I
O14578	1	Citron Rho-interacting kinase OS=Homo sapiens GN=CIT PE=1 SV=2 - [CTRO_HUMAN]	O14578	S1971	Citron Rho-interacting kinase (CRIK) (EC 2.7.11.1) (Serine/threonine-protein kinase 21)	CIT CRIK KIAA0949 STK21	TELRRDKSPGRPLER	CAMK/CAMK2	CaMK2d, CaMK2g	DKpSPGRPLER	1	S(3): 100.0	163	Forward	Class I
O14578	1	Citron Rho-interacting kinase OS=Homo sapiens GN=CIT PE=1 SV=2 - [CTRO_HUMAN]	O14578	S1993	Citron Rho-interacting kinase (CRIK) (EC 2.7.11.1) (Serine/threonine-protein kinase 21)	CIT CRIK KIAA0949 STK21	LSTRRERSPGRLFED	AGC	PKN1	ERpSPGRLFEDSSR	1	S(3): 100.0; S(11): 0.0; S(12): 0.0	195	Forward	Class I
O14579	1	Coatomer subunit epsilon OS=Homo sapiens GN=COPE PE=2 SV=3 - [COPE_HUMAN]	O14579	S13	Coatomer subunit epsilon (Epsilon-coat protein) (Epsilon-COP)	COPE	PGPASGGSGEVDELF			APPAPGPASGGpSGEVDELFDVK	1	S(9): 0.5; S(12): 99.5	202	Forward	Class I
O14579	1	Coatomer subunit epsilon OS=Homo sapiens GN=COPE PE=2 SV=3 - [COPE_HUMAN]	O14579	S99	Coatomer subunit epsilon (Epsilon-coat protein) (Epsilon-COP)	COPE	AHESRRDSIVAELDR	STE/STE20	NRK	RDpSIVAELDREMSR	1	S(3): 100.0; S(13): 0.0	274	Forward	Class I
O14617	1	AP-3 complex subunit delta-1 OS=Homo sapiens GN=AP3D1 PE=1 SV=1 - [AP3D1_HUMAN]	O14617	S9	AP-3 complex subunit delta-1 (AP-3 complex subunit delta) (Adapter-related protein complex 3 subunit delta-1) (Delta-adaptin)	AP3D1 PRO0039	ALKMVKGSIDRMFDK			MVKGpSIDR	1	S(5): 100.0	106	Forward	Class I
O14617	1	AP-3 complex subunit delta-1 OS=Homo sapiens GN=AP3D1 PE=1 SV=1 - [AP3D1_HUMAN]	O14617	S658	AP-3 complex subunit delta-1 (AP-3 complex subunit delta) (Adapter-related protein complex 3 subunit delta-1) (Delta-adaptin)	AP3D1 PRO0039	RRPKHRPSEADEEEL			HRPpSEADEEELAR	1	S(4): 100.0	296	Forward	Class I
O14617	1	AP-3 complex subunit delta-1 OS=Homo sapiens GN=AP3D1 PE=1 SV=1 - [AP3D1_HUMAN]	O14617	S686	AP-3 complex subunit delta-1 (AP-3 complex subunit delta) (Adapter-related protein complex 3 subunit delta-1) (Delta-adaptin)	AP3D1 PRO0039	NPFYIKSSPSPQKRY			KQEQANNPFYIKSpSPSPQK	1	Y(10): 0.0; S(13): 1.4; S(14): 98.6; S(16): 0.0	256	Forward	Class I
O14639	1	Actin-binding LIM protein 1 OS=Homo sapiens GN=ABLIM1 PE=1 SV=3 - [ABLM1_HUMAN]	O14639	S367	Actin-binding LIM protein 1 (abLIM-1) (Actin-binding LIM protein family member 1) (Actin-binding double zinc finger protein) (LIMAB1) (Limatin)	ABLIM1 ABLIM KIAA0059 LIMAB1	PGSSIPGSPGHTIYA			TSSESIYSRPGSSIPGpSPGHTIYAK	1	T(1): 0.0; S(2): 0.0; S(3): 0.0; S(5): 0.0; Y(7): 0.0; S(8): 0.0; S(12): 0.0; S(13): 0.0; S(17): 99.9; T(21): 0.0; Y(23): 0.0	202	Forward	Class I
O14639	1	Actin-binding LIM protein 1 OS=Homo sapiens GN=ABLIM1 PE=1 SV=3 - [ABLM1_HUMAN]	O14639	T371	Actin-binding LIM protein 1 (abLIM-1) (Actin-binding LIM protein family member 1) (Actin-binding double zinc finger protein) (LIMAB1) (Limatin)	ABLIM1 ABLIM KIAA0059 LIMAB1	IPGSPGHTIYAKVDN			TSSESIYSRPGSSIPGSPGHpTIYAK	1	T(1): 0.0; S(2): 0.0; S(3): 0.0; S(5): 0.1; Y(7): 2.9; S(8): 2.9; S(12): 2.9; S(13): 2.9; S(17): 2.9; T(21): 85.4; Y(23): 0.1	87	Forward	Class I
O14639	1	Actin-binding LIM protein 1 OS=Homo sapiens GN=ABLIM1 PE=1 SV=3 - [ABLM1_HUMAN]	O14639	S431	Actin-binding LIM protein 1 (abLIM-1) (Actin-binding LIM protein family member 1) (Actin-binding double zinc finger protein) (LIMAB1) (Limatin)	ABLIM1 ABLIM KIAA0059 LIMAB1	GESPRTLSPTPSAEG			TLpSPTPSAEGYQDVRDR	1	T(1): 0.0; S(3): 100.0; T(5): 0.0; S(7): 0.0; Y(11): 0.0	344	Forward	Class I
O14639	1	Actin-binding LIM protein 1 OS=Homo sapiens GN=ABLIM1 PE=1 SV=3 - [ABLM1_HUMAN]	O14639	T433	Actin-binding LIM protein 1 (abLIM-1) (Actin-binding LIM protein family member 1) (Actin-binding double zinc finger protein) (LIMAB1) (Limatin)	ABLIM1 ABLIM KIAA0059 LIMAB1	SPRTLSPTPSAEGYQ			TLpSPpTPSAEGYQDVR	2	T(1): 0.6; S(3): 99.4; T(5): 99.4; S(7): 0.6; Y(11): 0.0	141	Forward	Class I
O14639	1	Actin-binding LIM protein 1 OS=Homo sapiens GN=ABLIM1 PE=1 SV=3 - [ABLM1_HUMAN]	O14639	S435	Actin-binding LIM protein 1 (abLIM-1) (Actin-binding LIM protein family member 1) (Actin-binding double zinc finger protein) (LIMAB1) (Limatin)	ABLIM1 ABLIM KIAA0059 LIMAB1	RTLSPTPSAEGYQDV			TLpSPTPpSAEGYQDVR	2	T(1): 0.0; S(3): 100.0; T(5): 0.0; S(7): 100.0; Y(11): 0.0	231	Forward	Class I
O14639	1	Actin-binding LIM protein 1 OS=Homo sapiens GN=ABLIM1 PE=1 SV=3 - [ABLM1_HUMAN]	O14639	S452	Actin-binding LIM protein 1 (abLIM-1) (Actin-binding LIM protein family member 1) (Actin-binding double zinc finger protein) (LIMAB1) (Limatin)	ABLIM1 ABLIM KIAA0059 LIMAB1	RMIHRSTSQGSINSP			STpSQGSINSPVYSR	1	S(1): 0.3; T(2): 0.3; S(3): 99.4; S(6): 0.0; S(9): 0.0; Y(12): 0.0; S(13): 0.0	230	Forward	Class I
O14639	1	Actin-binding LIM protein 1 OS=Homo sapiens GN=ABLIM1 PE=1 SV=3 - [ABLM1_HUMAN]	O14639	S455	Actin-binding LIM protein 1 (abLIM-1) (Actin-binding LIM protein family member 1) (Actin-binding double zinc finger protein) (LIMAB1) (Limatin)	ABLIM1 ABLIM KIAA0059 LIMAB1	HRSTSQGSINSPVYS			STpSQGpSINSPVYSR	2	S(1): 0.6; T(2): 0.6; S(3): 98.8; S(6): 100.0; S(9): 0.0; Y(12): 0.0; S(13): 0.0	146	Forward	Class I
O14639	1	Actin-binding LIM protein 1 OS=Homo sapiens GN=ABLIM1 PE=1 SV=3 - [ABLM1_HUMAN]	O14639	S458	Actin-binding LIM protein 1 (abLIM-1) (Actin-binding LIM protein family member 1) (Actin-binding double zinc finger protein) (LIMAB1) (Limatin)	ABLIM1 ABLIM KIAA0059 LIMAB1	TSQGSINSPVYSRHS			STSQGSINpSPVYSR	1	S(1): 0.0; T(2): 0.0; S(3): 0.0; S(6): 0.0; S(9): 100.0; Y(12): 0.0; S(13): 0.0	265	Forward	Class I
O14639	1	Actin-binding LIM protein 1 OS=Homo sapiens GN=ABLIM1 PE=1 SV=3 - [ABLM1_HUMAN]	O14639	S540	Actin-binding LIM protein 1 (abLIM-1) (Actin-binding LIM protein family member 1) (Actin-binding double zinc finger protein) (LIMAB1) (Limatin)	ABLIM1 ABLIM KIAA0059 LIMAB1	ALAAQSKSSEDIIKF			QHAALAAQSKpSSEDIIK	1	S(9): 0.0; S(11): 100.0; S(12): 0.0	431	Forward	Class I
O14639	1	Actin-binding LIM protein 1 OS=Homo sapiens GN=ABLIM1 PE=1 SV=3 - [ABLM1_HUMAN]	O14639	S587	Actin-binding LIM protein 1 (abLIM-1) (Actin-binding LIM protein family member 1) (Actin-binding double zinc finger protein) (LIMAB1) (Limatin)	ABLIM1 ABLIM KIAA0059 LIMAB1	PDMKRRSSGREEDDE			SpSGREEDDEELLR	1	S(1): 0.1; S(2): 99.9	309	Forward	Class I
O14639	1	Actin-binding LIM protein 1 OS=Homo sapiens GN=ABLIM1 PE=1 SV=3 - [ABLM1_HUMAN]	O14639	T653	Actin-binding LIM protein 1 (abLIM-1) (Actin-binding LIM protein family member 1) (Actin-binding double zinc finger protein) (LIMAB1) (Limatin)	ABLIM1 ABLIM KIAA0059 LIMAB1	SHIPSSKTASLPGYG			pTASLPGYGR	1	T(1): 100.0; S(3): 0.0; Y(7): 0.0	131	Forward	Class I
O14639	1	Actin-binding LIM protein 1 OS=Homo sapiens GN=ABLIM1 PE=1 SV=3 - [ABLM1_HUMAN]	O14639	S655	Actin-binding LIM protein 1 (abLIM-1) (Actin-binding LIM protein family member 1) (Actin-binding double zinc finger protein) (LIMAB1) (Limatin)	ABLIM1 ABLIM KIAA0059 LIMAB1	IPSSKTASLPGYGRN			TApSLPGYGR	1	T(1): 0.0; S(3): 100.0; Y(7): 0.0	113	Forward	Class I
O14639	1	Actin-binding LIM protein 1 OS=Homo sapiens GN=ABLIM1 PE=1 SV=3 - [ABLM1_HUMAN]	O14639	S706	Actin-binding LIM protein 1 (abLIM-1) (Actin-binding LIM protein family member 1) (Actin-binding double zinc finger protein) (LIMAB1) (Limatin)	ABLIM1 ABLIM KIAA0059 LIMAB1	MRMDRGVSMPNMLEP			MDRGVpSMPNMLEPK	1	S(6): 100.0	326	Forward	Class I
O14646	1	Chromodomain-helicase-DNA-binding protein 1 OS=Homo sapiens GN=CHD1 PE=1 SV=1 - [CHD1_HUMAN]	O14646	S90	Chromodomain-helicase-DNA-binding protein 1 (CHD-1) (EC 3.6.4.12) (ATP-dependent helicase CHD1)	CHD1	GAEFWKSSPSILAVQ	CMGC/CDK	CDK9	SpSPSILAVQR	1	S(1): 2.1; S(2): 97.9; S(4): 0.0	141	Forward	Class I
O14646	1	Chromodomain-helicase-DNA-binding protein 1 OS=Homo sapiens GN=CHD1 PE=1 SV=1 - [CHD1_HUMAN]	O14646	S1677	Chromodomain-helicase-DNA-binding protein 1 (CHD-1) (EC 3.6.4.12) (ATP-dependent helicase CHD1)	CHD1	ASSSGPRSPLDQRSY			ASSSGPRpSPLDQR	1	S(2): 0.0; S(3): 0.0; S(4): 0.0; S(8): 100.0	307	Forward	Class I
O14646	1	Chromodomain-helicase-DNA-binding protein 1 OS=Homo sapiens GN=CHD1 PE=1 SV=1 - [CHD1_HUMAN]	O14646	S1688	Chromodomain-helicase-DNA-binding protein 1 (CHD-1) (EC 3.6.4.12) (ATP-dependent helicase CHD1)	CHD1	QRSYGSRSPFEHSVE			SYGSRpSPFEHSVEHK	1	S(1): 0.0; Y(2): 0.0; S(4): 0.0; S(6): 100.0; S(11): 0.0	281	Forward	Class I
O14647	1	Chromodomain-helicase-DNA-binding protein 2 OS=Homo sapiens GN=CHD2 PE=2 SV=2 - [CHD2_HUMAN]	O14647	S1365	Chromodomain-helicase-DNA-binding protein 2 (CHD-2) (EC 3.6.4.12) (ATP-dependent helicase CHD2)	CHD2	EHGIELSSPRHSDNP			LKEEHGIELSpSPR	1	S(10): 0.0; S(11): 100.0	366	Forward	Class I
O14647	1	Chromodomain-helicase-DNA-binding protein 2 OS=Homo sapiens GN=CHD2 PE=2 SV=2 - [CHD2_HUMAN]	O14647	S1807	Chromodomain-helicase-DNA-binding protein 2 (CHD-2) (EC 3.6.4.12) (ATP-dependent helicase CHD2)	CHD2	KSPLDHRSPLERSLE			SPLDHRpSPLER	1	S(1): 0.0; S(7): 100.0	190	Forward	Class I
O14686	1	Histone-lysine N-methyltransferase MLL2 OS=Homo sapiens GN=MLL2 PE=1 SV=1 - [MLL2_HUMAN]	O14686	S1396	Histone-lysine N-methyltransferase MLL2 (EC 2.1.1.43) (ALL1-related protein) (Lysine N-methyltransferase 2B) (KMT2B) (Myeloid/lymphoid or mixed-lineage leukemia protein 2)	MLL2 ALR KMT2B	IKLEGPVSPDVEPGK			LEGPVpSPDVEPGKEETEESK	1	S(6): 100.0; T(16): 0.0; S(19): 0.0	212	Forward	Class I
O14686	1	Histone-lysine N-methyltransferase MLL2 OS=Homo sapiens GN=MLL2 PE=1 SV=1 - [MLL2_HUMAN]	O14686	T1965	Histone-lysine N-methyltransferase MLL2 (EC 2.1.1.43) (ALL1-related protein) (Lysine N-methyltransferase 2B) (KMT2B) (Myeloid/lymphoid or mixed-lineage leukemia protein 2)	MLL2 ALR KMT2B	TPRHQPSTPDPFLKP			HQPSpTPDPFLKPR	1	S(4): 0.0; T(5): 100.0	172	Forward	Class I
O14686	1	Histone-lysine N-methyltransferase MLL2 OS=Homo sapiens GN=MLL2 PE=1 SV=1 - [MLL2_HUMAN]	O14686	S1999	Histone-lysine N-methyltransferase MLL2 (EC 2.1.1.43) (ALL1-related protein) (Lysine N-methyltransferase 2B) (KMT2B) (Myeloid/lymphoid or mixed-lineage leukemia protein 2)	MLL2 ALR KMT2B	KASEPLLSPPPFGES			ASEPLLpSPPPFGESRK	1	S(2): 0.0; S(7): 100.0; S(14): 0.0	181	Forward	Class I
O14686	1	Histone-lysine N-methyltransferase MLL2 OS=Homo sapiens GN=MLL2 PE=1 SV=1 - [MLL2_HUMAN]	O14686	S2365	Histone-lysine N-methyltransferase MLL2 (EC 2.1.1.43) (ALL1-related protein) (Lysine N-methyltransferase 2B) (KMT2B) (Myeloid/lymphoid or mixed-lineage leukemia protein 2)	MLL2 ALR KMT2B	SQRSGITSPVEKRED			SGITpSPVEK	1	S(1): 0.0; T(4): 0.0; S(5): 100.0	131	Forward	Class I
O14686	1	Histone-lysine N-methyltransferase MLL2 OS=Homo sapiens GN=MLL2 PE=1 SV=1 - [MLL2_HUMAN]	O14686	S2855	Histone-lysine N-methyltransferase MLL2 (EC 2.1.1.43) (ALL1-related protein) (Lysine N-methyltransferase 2B) (KMT2B) (Myeloid/lymphoid or mixed-lineage leukemia protein 2)	MLL2 ALR KMT2B	EEGGRHPSPCQFTIA			VEEGGRHPpSPCQFTIATPK	1	S(9): 100.0; T(14): 0.0; T(17): 0.0	184	Forward	Class I
O14686	1	Histone-lysine N-methyltransferase MLL2 OS=Homo sapiens GN=MLL2 PE=1 SV=1 - [MLL2_HUMAN]	O14686	S4463	Histone-lysine N-methyltransferase MLL2 (EC 2.1.1.43) (ALL1-related protein) (Lysine N-methyltransferase 2B) (KMT2B) (Myeloid/lymphoid or mixed-lineage leukemia protein 2)	MLL2 ALR KMT2B	EQEDRALSPVIPLIP			ALpSPVIPLIPR	1	S(3): 100.0	217	Forward	Class I
O14686	1	Histone-lysine N-methyltransferase MLL2 OS=Homo sapiens GN=MLL2 PE=1 SV=1 - [MLL2_HUMAN]	O14686	S4547	Histone-lysine N-methyltransferase MLL2 (EC 2.1.1.43) (ALL1-related protein) (Lysine N-methyltransferase 2B) (KMT2B) (Myeloid/lymphoid or mixed-lineage leukemia protein 2)	MLL2 ALR KMT2B	YEVLFPESPARGGTE			IPNSYEVLFPEpSPAR	1	S(4): 0.0; Y(5): 0.0; S(12): 100.0	81	Forward	Class I
O14713	1	Integrin beta-1-binding protein 1 OS=Homo sapiens GN=ITGB1BP1 PE=1 SV=1 - [ITBP1_HUMAN]	O14713	S41	Integrin beta-1-binding protein 1 (Integrin cytoplasmic domain-associated protein 1) (ICAP-1)	ITGB1BP1 ICAP1	SRSSTVASLDTDSTK			SSTVApSLDTDSTK	1	S(1): 0.0; S(2): 0.0; T(3): 0.0; S(6): 100.0; T(9): 0.0; S(11): 0.0; T(12): 0.0	166	Forward	Class I
O14727	1	Apoptotic protease-activating factor 1 OS=Homo sapiens GN=APAF1 PE=1 SV=2 - [APAF_HUMAN]	O14727	S762	Apoptotic protease-activating factor 1 (APAF-1)	APAF1 KIAA0413	DKLLASCSADGTLKL			LLASCpSADGTLK	1	S(4): 0.0; S(6): 100.0; T(10): 0.0	145	Forward	Class I
O14730	1	Serine/threonine-protein kinase RIO3 OS=Homo sapiens GN=RIOK3 PE=1 SV=2 - [RIOK3_HUMAN]	O14730	T348	Serine/threonine-protein kinase RIO3 (EC 2.7.11.1) (RIO kinase 3) (sudD homolog)	RIOK3 SUDD	RAGIPCPTVVLLKKH			AGIPCPpTVVLLK	1	T(7): 100.0	72	Forward	Class I
O14745	1	Ezrin-radixin-moesin-binding phosphoprotein 50 OS=Homo sapiens GN=SLC9A3R1 PE=1 SV=4 - [NHERF_HUMAN]	O14745	S280	Na(+)/H(+) exchange regulatory cofactor NHE-RF1 (NHERF-1) (Ezrin-radixin-moesin-binding phosphoprotein 50) (EBP50) (Regulatory cofactor of Na(+)/H(+) exchanger) (Sodium-hydrogen exchanger regulatory factor 1) (Solute carrier family 9 isoform A3 regulatory factor 1)	SLC9A3R1 NHERF NHERF1	LAEAALESPRPALVR	Atypical/PIKK/FRAP	FRAP	EALAEAALEpSPRPALVR	1	S(10): 100.0	266	Forward	Class I
O14745	1	Ezrin-radixin-moesin-binding phosphoprotein 50 OS=Homo sapiens GN=SLC9A3R1 PE=1 SV=4 - [NHERF_HUMAN]	O14745	S290	Na(+)/H(+) exchange regulatory cofactor NHE-RF1 (NHERF-1) (Ezrin-radixin-moesin-binding phosphoprotein 50) (EBP50) (Regulatory cofactor of Na(+)/H(+) exchanger) (Sodium-hydrogen exchanger regulatory factor 1) (Solute carrier family 9 isoform A3 regulatory factor 1)	SLC9A3R1 NHERF NHERF1	PALVRSASSDTSEEL	CAMK/PKD	PKD1, PKD2, PKD3	SApSSDTSEELNSQDSPPK	1	S(1): 0.3; S(3): 99.7; S(4): 0.0; T(6): 0.0; S(7): 0.0; S(12): 0.0; S(15): 0.0	377	Forward	Class I
O14757	1	Serine/threonine-protein kinase Chk1 OS=Homo sapiens GN=CHEK1 PE=1 SV=1 - [CHK1_HUMAN]	O14757	S280	Serine/threonine-protein kinase Chk1 (EC 2.7.11.1) (CHK1 checkpoint homolog) (Cell cycle checkpoint kinase) (Checkpoint kinase-1)	CHEK1 CHK1	AKRPRVTSGGVSESP	AGC/AKT	AKT1	VTpSGGVSESPSGFSK	1	T(2): 0.5; S(3): 98.6; S(7): 0.5; S(9): 0.5; S(11): 0.0; S(14): 0.0	100	Forward	Class I
O14795	1	Protein unc-13 homolog B OS=Homo sapiens GN=UNC13B PE=1 SV=2 - [UN13B_HUMAN]	O14795	S367	Protein unc-13 homolog B (Munc13-2) (munc13)	UNC13B UNC13	FPEENASSPFTQARA			DHFLGPQESFPEENASpSPFTQAR	1	S(9): 0.0; S(16): 0.6; S(17): 99.4; T(20): 0.0	364	Forward	Class I
O14874	1	[3-methyl-2-oxobutanoate dehydrogenase [lipoamide]] kinase, mitochondrial OS=Homo sapiens GN=BCKDK PE=1 SV=2 - [BCKD_HUMAN]	O14874	S31	[3-methyl-2-oxobutanoate dehydrogenase [lipoamide]] kinase, mitochondrial (EC 2.7.11.4) (Branched-chain alpha-ketoacid dehydrogenase kinase) (BCKD-kinase) (BCKDHKIN)	BCKDK	ALALRARSTSATDTH			pSTSATDTHHVEMAR	1	S(1): 99.9; T(2): 0.1; S(3): 0.0; T(5): 0.0; T(7): 0.0	304	Forward	Class I
O14908	1	PDZ domain-containing protein GIPC1 OS=Homo sapiens GN=GIPC1 PE=1 SV=2 - [GIPC1_HUMAN]	O14908	S232	PDZ domain-containing protein GIPC1 (GAIP C-terminus-interacting protein) (RGS-GAIP-interacting protein) (RGS19-interacting protein 1) (Tax interaction protein 2) (TIP-2)	GIPC1 C19orf3 GIPC RGS19IP1	SAGGRPGSGPQLGTG			SAGGRPGpSGPQLGTGR	1	S(1): 0.0; S(8): 100.0; T(14): 0.0	213	Forward	Class I
O14908	1	PDZ domain-containing protein GIPC1 OS=Homo sapiens GN=GIPC1 PE=1 SV=2 - [GIPC1_HUMAN]	O14908	T242	PDZ domain-containing protein GIPC1 (GAIP C-terminus-interacting protein) (RGS-GAIP-interacting protein) (RGS19-interacting protein 1) (Tax interaction protein 2) (TIP-2)	GIPC1 C19orf3 GIPC RGS19IP1	QLGTGRGTLRLRSRG			SAGGRPGSGPQLGTGRGpTLR	1	S(1): 0.0; S(8): 0.0; T(14): 0.0; T(18): 100.0	240	Forward	Class I
O14920	1	Inhibitor of nuclear factor kappa-B kinase subunit beta OS=Homo sapiens GN=IKBKB PE=1 SV=1 - [IKKB_HUMAN]	O14920	S672	Inhibitor of nuclear factor kappa-B kinase subunit beta (I-kappa-B-kinase beta) (IKK-B) (IKK-beta) (IkBKB) (EC 2.7.11.10) (I-kappa-B kinase 2) (IKK2) (Nuclear factor NF-kappa-B inhibitor kinase beta) (NFKBIKB)	IKBKB IKKB	VRGPVSGSPDSMNAS	Atypical/PIKK/FRAP	FRAP	VRGPVSGpSPDSMNASR	1	S(6): 0.0; S(8): 99.2; S(11): 0.8; S(15): 0.0	182	Forward	Class I
O14924	1	Regulator of G-protein signaling 12 OS=Homo sapiens GN=RGS12 PE=1 SV=1 - [RGS12_HUMAN]	O14924	S671	Regulator of G-protein signaling 12 (RGS12)	RGS12	DLESATVSDGELTGA			SLDDLESATVpSDGELTGADLK	1	S(1): 0.0; S(7): 0.5; T(9): 0.5; S(11): 98.9; T(16): 0.0	186	Forward	Class I
O14924	1	Regulator of G-protein signaling 12 OS=Homo sapiens GN=RGS12 PE=1 SV=1 - [RGS12_HUMAN]	O14924	S850	Regulator of G-protein signaling 12 (RGS12)	RGS12	DSQQVPSSPASKHSL	STE/STE7	MAP2K2	ALPDSQQVPSpSPASK	1	S(5): 0.0; S(10): 0.0; S(11): 100.0; S(14): 0.0	216	Forward	Class I
O14974	1	Protein phosphatase 1 regulatory subunit 12A OS=Homo sapiens GN=PPP1R12A PE=1 SV=1 - [MYPT1_HUMAN]	O14974	T443	Protein phosphatase 1 regulatory subunit 12A (Myosin phosphatase-targeting subunit 1) (Myosin phosphatase target subunit 1) (Protein phosphatase myosin-binding subunit)	PPP1R12A MBS MYPT1	WRLGLRKTGSYGALA			pTGSYGALAEITASK	1	T(1): 99.8; S(3): 0.2; Y(4): 0.0; T(11): 0.0; S(13): 0.0	315	Forward	Class I
O14974	1	Protein phosphatase 1 regulatory subunit 12A OS=Homo sapiens GN=PPP1R12A PE=1 SV=1 - [MYPT1_HUMAN]	O14974	S445	Protein phosphatase 1 regulatory subunit 12A (Myosin phosphatase-targeting subunit 1) (Myosin phosphatase target subunit 1) (Protein phosphatase myosin-binding subunit)	PPP1R12A MBS MYPT1	LGLRKTGSYGALAEI	CAMK/CAMK2	CaMK2d, CaMK2g	TGpSYGALAEITASK	1	T(1): 0.0; S(3): 100.0; Y(4): 0.0; T(11): 0.0; S(13): 0.0	404	Forward	Class I
O14974	1	Protein phosphatase 1 regulatory subunit 12A OS=Homo sapiens GN=PPP1R12A PE=1 SV=1 - [MYPT1_HUMAN]	O14974	Y446	Protein phosphatase 1 regulatory subunit 12A (Myosin phosphatase-targeting subunit 1) (Myosin phosphatase target subunit 1) (Protein phosphatase myosin-binding subunit)	PPP1R12A MBS MYPT1	GLRKTGSYGALAEIT	TK/Axl	MER	TGSpYGALAEITASK	1	T(1): 4.3; S(3): 4.3; Y(4): 91.5; T(11): 0.0; S(13): 0.0	117	Forward	Class I
O14974	1	Protein phosphatase 1 regulatory subunit 12A OS=Homo sapiens GN=PPP1R12A PE=1 SV=1 - [MYPT1_HUMAN]	O14974	S472	Protein phosphatase 1 regulatory subunit 12A (Myosin phosphatase-targeting subunit 1) (Myosin phosphatase target subunit 1) (Protein phosphatase myosin-binding subunit)	PPP1R12A MBS MYPT1	AGVTRSASSPRLSSS			SApSpSPRLSSSLDNK	2	S(1): 0.0; S(3): 100.0; S(4): 100.0; S(8): 0.0; S(9): 0.0; S(10): 0.0	197	Forward	Class I
O14974	1	Protein phosphatase 1 regulatory subunit 12A OS=Homo sapiens GN=PPP1R12A PE=1 SV=1 - [MYPT1_HUMAN]	O14974	S473	Protein phosphatase 1 regulatory subunit 12A (Myosin phosphatase-targeting subunit 1) (Myosin phosphatase target subunit 1) (Protein phosphatase myosin-binding subunit)	PPP1R12A MBS MYPT1	GVTRSASSPRLSSSL	CAMK/MLCK	caMLCK, smMLCK	SApSpSPRLSSSLDNK	2	S(1): 0.0; S(3): 100.0; S(4): 100.0; S(8): 0.0; S(9): 0.0; S(10): 0.0	197	Forward	Class I
O14974	1	Protein phosphatase 1 regulatory subunit 12A OS=Homo sapiens GN=PPP1R12A PE=1 SV=1 - [MYPT1_HUMAN]	O14974	S507	Protein phosphatase 1 regulatory subunit 12A (Myosin phosphatase-targeting subunit 1) (Myosin phosphatase target subunit 1) (Protein phosphatase myosin-binding subunit)	PPP1R12A MBS MYPT1	TIPRRLASTSDIEEK	CAMK/CAMK2	CaMK2d, CaMK2g	RLApSTSDIEEK	1	S(4): 100.0; T(5): 0.0; S(6): 0.0	281	Forward	Class I
O14974	1	Protein phosphatase 1 regulatory subunit 12A OS=Homo sapiens GN=PPP1R12A PE=1 SV=1 - [MYPT1_HUMAN]	O14974	S618	Protein phosphatase 1 regulatory subunit 12A (Myosin phosphatase-targeting subunit 1) (Myosin phosphatase target subunit 1) (Protein phosphatase myosin-binding subunit)	PPP1R12A MBS MYPT1	NRLWAEDSTEKEKDS			LWAEDpSpTEKEK	2	S(6): 100.0; T(7): 100.0	184	Forward	Class I
O14974	1	Protein phosphatase 1 regulatory subunit 12A OS=Homo sapiens GN=PPP1R12A PE=1 SV=1 - [MYPT1_HUMAN]	O14974	T619	Protein phosphatase 1 regulatory subunit 12A (Myosin phosphatase-targeting subunit 1) (Myosin phosphatase target subunit 1) (Protein phosphatase myosin-binding subunit)	PPP1R12A MBS MYPT1	RLWAEDSTEKEKDSV			LWAEDpSpTEKEK	2	S(6): 100.0; T(7): 100.0	184	Forward	Class I
O14974	1	Protein phosphatase 1 regulatory subunit 12A OS=Homo sapiens GN=PPP1R12A PE=1 SV=1 - [MYPT1_HUMAN]	O14974	T696	Protein phosphatase 1 regulatory subunit 12A (Myosin phosphatase-targeting subunit 1) (Myosin phosphatase target subunit 1) (Protein phosphatase myosin-binding subunit)	PPP1R12A MBS MYPT1	ARQSRRSTQGVTLTD	CAMK/DAPK	DAPK3	RSpTQGVTLTDLQEAEK	1	S(2): 0.3; T(3): 99.7; T(7): 0.0; T(9): 0.0	386	Forward	Class I
O14974	1	Protein phosphatase 1 regulatory subunit 12A OS=Homo sapiens GN=PPP1R12A PE=1 SV=1 - [MYPT1_HUMAN]	O14974	S862	Protein phosphatase 1 regulatory subunit 12A (Myosin phosphatase-targeting subunit 1) (Myosin phosphatase target subunit 1) (Protein phosphatase myosin-binding subunit)	PPP1R12A MBS MYPT1	VSFWTQDSDENEQEQ	TKL/RAF	RAF1	STGVSFWTQDpSDENEQEQQpSDTEEGSNKK	2	S(1): 0.0; T(2): 0.0; S(5): 0.0; T(8): 2.0; S(11): 98.0; S(20): 98.0; T(22): 2.0; S(26): 0.0	146	Forward	Class I
O14974	1	Protein phosphatase 1 regulatory subunit 12A OS=Homo sapiens GN=PPP1R12A PE=1 SV=1 - [MYPT1_HUMAN]	O14974	S871	Protein phosphatase 1 regulatory subunit 12A (Myosin phosphatase-targeting subunit 1) (Myosin phosphatase target subunit 1) (Protein phosphatase myosin-binding subunit)	PPP1R12A MBS MYPT1	ENEQEQQSDTEEGSN	AGC/GRK	BARK1	STGVSFWTQDSDENEQEQQpSDTEEGSNKK	1	S(1): 0.0; T(2): 0.0; S(5): 0.0; T(8): 0.0; S(11): 0.0; S(20): 100.0; T(22): 0.0; S(26): 0.0	236	Forward	Class I
O14974	1	Protein phosphatase 1 regulatory subunit 12A OS=Homo sapiens GN=PPP1R12A PE=1 SV=1 - [MYPT1_HUMAN]	O14974	S877	Protein phosphatase 1 regulatory subunit 12A (Myosin phosphatase-targeting subunit 1) (Myosin phosphatase target subunit 1) (Protein phosphatase myosin-binding subunit)	PPP1R12A MBS MYPT1	QSDTEEGSNKKETQT			STGVSFWTQDSDENEQEQQSDTEEGpSNKK	1	S(1): 0.0; T(2): 0.0; S(5): 0.0; T(8): 0.0; S(11): 3.6; S(20): 3.6; T(22): 3.6; S(26): 89.3	66	Forward	Class I
O14974	1	Protein phosphatase 1 regulatory subunit 12A OS=Homo sapiens GN=PPP1R12A PE=1 SV=1 - [MYPT1_HUMAN]	O14974	S908	Protein phosphatase 1 regulatory subunit 12A (Myosin phosphatase-targeting subunit 1) (Myosin phosphatase target subunit 1) (Protein phosphatase myosin-binding subunit)	PPP1R12A MBS MYPT1	YDSLLGRSGSYSYLE			pSGSYSYLEER	1	S(1): 100.0; S(3): 0.0; Y(4): 0.0; S(5): 0.0; Y(6): 0.0	133	Forward	Class I
O14974	1	Protein phosphatase 1 regulatory subunit 12A OS=Homo sapiens GN=PPP1R12A PE=1 SV=1 - [MYPT1_HUMAN]	O14974	S910	Protein phosphatase 1 regulatory subunit 12A (Myosin phosphatase-targeting subunit 1) (Myosin phosphatase target subunit 1) (Protein phosphatase myosin-binding subunit)	PPP1R12A MBS MYPT1	SLLGRSGSYSYLEER	CAMK/MLCK	caMLCK, smMLCK	SGpSYSYLEER	1	S(1): 0.1; S(3): 99.8; Y(4): 0.1; S(5): 0.0; Y(6): 0.0	117	Forward	Class I
O14979	1	Heterogeneous nuclear ribonucleoprotein D-like OS=Homo sapiens GN=HNRPDL PE=1 SV=3 - [HNRDL_HUMAN]	O14979	S241	Heterogeneous nuclear ribonucleoprotein D-like (hnRNP D-like) (hnRNP DL) (AU-rich element RNA-binding factor) (JKT41-binding protein) (Protein laAUF1)	HNRPDL JKTBP	KVFVGGLSPDTSEEQ			VFVGGLpSPDTSEEQIK	1	S(7): 100.0; T(10): 0.0; S(11): 0.0	368	Forward	Class I
O15013	1	Rho guanine nucleotide exchange factor 10 OS=Homo sapiens GN=ARHGEF10 PE=1 SV=4 - [ARHGA_HUMAN]	O15013	S379	Rho guanine nucleotide exchange factor 10	ARHGEF10 KIAA0294	RSFIRTKSLIAQDHR			pSLIAQDHR	1	S(1): 100.0	150	Forward	Class I
O15013	1	Rho guanine nucleotide exchange factor 10 OS=Homo sapiens GN=ARHGEF10 PE=1 SV=4 - [ARHGA_HUMAN]	O15013	S1232	Rho guanine nucleotide exchange factor 10	ARHGEF10 KIAA0294	DKDKSRDSLAPGPEP			SRDpSLAPGPEPQDEDQK	1	S(1): 0.0; S(4): 100.0	213	Forward	Class I
O15013	1	Rho guanine nucleotide exchange factor 10 OS=Homo sapiens GN=ARHGEF10 PE=1 SV=4 - [ARHGA_HUMAN]	O15013	S1284	Rho guanine nucleotide exchange factor 10	ARHGEF10 KIAA0294	QKSDLSSSSGSLSLS			SDLSSpSSGSLSLSHGSSSLEHR	1	S(1): 0.0; S(4): 1.3; S(5): 1.3; S(6): 92.1; S(7): 1.3; S(9): 1.3; S(11): 1.3; S(13): 1.3; S(16): 0.0; S(17): 0.0; S(18): 0.0	162	Forward	Class I
O15014	1	Zinc finger protein 609 OS=Homo sapiens GN=ZNF609 PE=1 SV=2 - [ZN609_HUMAN]	O15014	S358	Zinc finger protein 609	ZNF609 KIAA0295	APPRFCDSPTSDLEM			FCDpSPTSDLEMR	1	S(4): 100.0; T(6): 0.0; S(7): 0.0	171	Forward	Class I
O15014	1	Zinc finger protein 609 OS=Homo sapiens GN=ZNF609 PE=1 SV=2 - [ZN609_HUMAN]	O15014	S433	Zinc finger protein 609	ZNF609 KIAA0295	TSEDVKASPSSANKR			GSQNSSEHRPPASSTSEDVKApSPSSANK	1	S(2): 0.0; S(5): 0.0; S(6): 0.0; S(13): 0.0; S(14): 0.0; T(15): 1.2; S(16): 1.2; S(22): 96.5; S(24): 1.2; S(25): 0.0	112	Forward	Class I
O15014	1	Zinc finger protein 609 OS=Homo sapiens GN=ZNF609 PE=1 SV=2 - [ZN609_HUMAN]	O15014	T465	Zinc finger protein 609	ZNF609 KIAA0295	KGSKRVRTNSMGSAT			pTNSMGSATGPLPGTK	1	T(1): 99.6; S(3): 0.4; S(6): 0.0; T(8): 0.0; T(14): 0.0	189	Forward	Class I
O15014	1	Zinc finger protein 609 OS=Homo sapiens GN=ZNF609 PE=1 SV=2 - [ZN609_HUMAN]	O15014	S467	Zinc finger protein 609	ZNF609 KIAA0295	SKRVRTNSMGSATGP			TNpSMGSATGPLPGTK	1	T(1): 0.5; S(3): 99.5; S(6): 0.0; T(8): 0.0; T(14): 0.0	239	Forward	Class I
O15014	1	Zinc finger protein 609 OS=Homo sapiens GN=ZNF609 PE=1 SV=2 - [ZN609_HUMAN]	O15014	S491	Zinc finger protein 609	ZNF609 KIAA0295	VLDRNCPSPVLIDCP			NCPpSPVLIDCPHPNCNK	1	S(4): 100.0	172	Forward	Class I
O15014	1	Zinc finger protein 609 OS=Homo sapiens GN=ZNF609 PE=1 SV=2 - [ZN609_HUMAN]	O15014	S576	Zinc finger protein 609	ZNF609 KIAA0295	VRLVEPHSPSPSSKF			LVEPHpSPSPSSK	1	S(6): 100.0; S(8): 0.0; S(10): 0.0; S(11): 0.0	225	Forward	Class I
O15014	1	Zinc finger protein 609 OS=Homo sapiens GN=ZNF609 PE=1 SV=2 - [ZN609_HUMAN]	O15014	T746	Zinc finger protein 609	ZNF609 KIAA0295	KELESPLTPGKVCRA			ELESPLpTPGK	1	S(4): 0.0; T(7): 100.0	138	Forward	Class I
O15014	1	Zinc finger protein 609 OS=Homo sapiens GN=ZNF609 PE=1 SV=2 - [ZN609_HUMAN]	O15014	S758	Zinc finger protein 609	ZNF609 KIAA0295	CRAEEGKSPFRESSG			AEEGKpSPFRESSGDGMK	1	S(6): 100.0; S(11): 0.0; S(12): 0.0	361	Forward	Class I
O15014	1	Zinc finger protein 609 OS=Homo sapiens GN=ZNF609 PE=1 SV=2 - [ZN609_HUMAN]	O15014	S804	Zinc finger protein 609	ZNF609 KIAA0295	SFTDNAPSPSIGGSS			IYSFTDNAPpSPSIGGSSR	1	Y(2): 0.0; S(3): 0.0; T(5): 0.0; S(10): 100.0; S(12): 0.0; S(16): 0.0; S(17): 0.0	395	Forward	Class I
O15014	1	Zinc finger protein 609 OS=Homo sapiens GN=ZNF609 PE=1 SV=2 - [ZN609_HUMAN]	O15014	S1055	Zinc finger protein 609	ZNF609 KIAA0295	PTLTKAPSLTDLVKS			APpSLTDLVK	1	S(3): 100.0; T(5): 0.0	156	Forward	Class I
O15014	1	Zinc finger protein 609 OS=Homo sapiens GN=ZNF609 PE=1 SV=2 - [ZN609_HUMAN]	O15014	S1285	Zinc finger protein 609	ZNF609 KIAA0295	DADKARASPSVTCKS			ARApSPSVTCK	1	S(4): 100.0; S(6): 0.0; T(8): 0.0	117	Forward	Class I
O15014	1	Zinc finger protein 609 OS=Homo sapiens GN=ZNF609 PE=1 SV=2 - [ZN609_HUMAN]	O15014	S1311	Zinc finger protein 609	ZNF609 KIAA0295	QHASHYKSKSPTISD			pSKSPTISDKTSQER	1	S(1): 100.0; S(3): 0.0; T(5): 0.0; S(7): 0.0; T(10): 0.0; S(11): 0.0	98	Forward	Class I
O15014	1	Zinc finger protein 609 OS=Homo sapiens GN=ZNF609 PE=1 SV=2 - [ZN609_HUMAN]	O15014	S1313	Zinc finger protein 609	ZNF609 KIAA0295	ASHYKSKSPTISDKT			SKpSPTISDKTSQER	1	S(1): 0.0; S(3): 100.0; T(5): 0.0; S(7): 0.0; T(10): 0.0; S(11): 0.0	290	Forward	Class I
O15016	1	Tripartite motif-containing protein 66 OS=Homo sapiens GN=TRIM66 PE=2 SV=3 - [TRI66_HUMAN]	O15016	S1086	Tripartite motif-containing protein 66	TRIM66 C11orf29 KIAA0298	IKRPMDLSIIRRKLQ			RPMDLpSIIRR	1	S(6): 100.0	111	Forward	Class I
O15018	1	PDZ domain-containing protein 2 OS=Homo sapiens GN=PDZD2 PE=1 SV=4 - [PDZD2_HUMAN]	O15018	S536	PDZ domain-containing protein 2 (Activated in prostate cancer protein) (PDZ domain-containing protein 3) [Cleaved into: Processed PDZ domain-containing protein 2]	PDZD2 AIPC KIAA0300 PDZK3	RIRMLEVSRDGRKHS			IRMLEVpSR	1	S(7): 100.0	69	Forward	Class I
O15021	1	Microtubule-associated serine/threonine-protein kinase 4 OS=Homo sapiens GN=MAST4 PE=1 SV=2 - [MAST4_HUMAN]	O15021	S1191	Microtubule-associated serine/threonine-protein kinase 4 (EC 2.7.11.1)	MAST4 KIAA0303	YRSGRRKSAGNIPLS			pSAGNIPLSPLAR	1	S(1): 100.0; S(8): 0.0	154	Forward	Class I
O15021	1	Microtubule-associated serine/threonine-protein kinase 4 OS=Homo sapiens GN=MAST4 PE=1 SV=2 - [MAST4_HUMAN]	O15021	S1198	Microtubule-associated serine/threonine-protein kinase 4 (EC 2.7.11.1)	MAST4 KIAA0303	SAGNIPLSPLARTPS			pSAGNIPLpSPLAR	2	S(1): 100.0; S(8): 100.0	93	Forward	Class I
O15021	1	Microtubule-associated serine/threonine-protein kinase 4 OS=Homo sapiens GN=MAST4 PE=1 SV=2 - [MAST4_HUMAN]	O15021	T1207	Microtubule-associated serine/threonine-protein kinase 4 (EC 2.7.11.1)	MAST4 KIAA0303	LARTPSPTPQPTSPQ			TPSPpTPQPTSPQR	1	T(1): 0.0; S(3): 0.6; T(5): 99.4; T(9): 0.0; S(10): 0.0	143	Forward	Class I
O15021	1	Microtubule-associated serine/threonine-protein kinase 4 OS=Homo sapiens GN=MAST4 PE=1 SV=2 - [MAST4_HUMAN]	O15021	S1240	Microtubule-associated serine/threonine-protein kinase 4 (EC 2.7.11.1)	MAST4 KIAA0303	AFPSKMHSPPTIVRH			MHpSPPTIVR	1	S(3): 100.0; T(6): 0.0	131	Forward	Class I
O15021	1	Microtubule-associated serine/threonine-protein kinase 4 OS=Homo sapiens GN=MAST4 PE=1 SV=2 - [MAST4_HUMAN]	O15021	S1288	Microtubule-associated serine/threonine-protein kinase 4 (EC 2.7.11.1)	MAST4 KIAA0303	HLCSRKHSLEVTQEE			KHpSLEVTQEEVQR	1	S(3): 100.0; T(7): 0.0	463	Forward	Class I
O15021	1	Microtubule-associated serine/threonine-protein kinase 4 OS=Homo sapiens GN=MAST4 PE=1 SV=2 - [MAST4_HUMAN]	O15021	S1344	Microtubule-associated serine/threonine-protein kinase 4 (EC 2.7.11.1)	MAST4 KIAA0303	RKVGRQESVDDLDRD			VGRQEpSVDDLDRDK	1	S(6): 100.0	373	Forward	Class I
O15021	1	Microtubule-associated serine/threonine-protein kinase 4 OS=Homo sapiens GN=MAST4 PE=1 SV=2 - [MAST4_HUMAN]	O15021	S1600	Microtubule-associated serine/threonine-protein kinase 4 (EC 2.7.11.1)	MAST4 KIAA0303	PGLVAPESPVRKSPS			VDSGTEKPGLVAPEpSPVRK	1	S(3): 0.0; T(5): 0.0; S(15): 100.0	167	Forward	Class I
O15021	1	Microtubule-associated serine/threonine-protein kinase 4 OS=Homo sapiens GN=MAST4 PE=1 SV=2 - [MAST4_HUMAN]	O15021	S1681	Microtubule-associated serine/threonine-protein kinase 4 (EC 2.7.11.1)	MAST4 KIAA0303	TTSARELSPSSLKMN			ELpSPSSLK	1	S(3): 100.0; S(5): 0.0; S(6): 0.0	112	Forward	Class I
O15021	1	Microtubule-associated serine/threonine-protein kinase 4 OS=Homo sapiens GN=MAST4 PE=1 SV=2 - [MAST4_HUMAN]	O15021	S1768	Microtubule-associated serine/threonine-protein kinase 4 (EC 2.7.11.1)	MAST4 KIAA0303	CLGQNLHSPDLARPR			LLTCLGQNLHpSPDLARPR	1	T(3): 0.0; S(11): 100.0	140	Forward	Class I
O15021	1	Microtubule-associated serine/threonine-protein kinase 4 OS=Homo sapiens GN=MAST4 PE=1 SV=2 - [MAST4_HUMAN]	O15021	S2151	Microtubule-associated serine/threonine-protein kinase 4 (EC 2.7.11.1)	MAST4 KIAA0303	VGEKQTLSPKHPKPS			QTLpSPKHPKPSTVK	1	T(2): 0.0; S(4): 100.0; S(11): 0.0; T(12): 0.0	128	Forward	Class I
O15021	1	Microtubule-associated serine/threonine-protein kinase 4 OS=Homo sapiens GN=MAST4 PE=1 SV=2 - [MAST4_HUMAN]	O15021	S2263	Microtubule-associated serine/threonine-protein kinase 4 (EC 2.7.11.1)	MAST4 KIAA0303	NGMKRSPSATGQSSF			RSPpSATGQSSFR	1	S(2): 0.0; S(4): 100.0; T(6): 0.0; S(9): 0.0; S(10): 0.0	132	Forward	Class I
O15021	1	Microtubule-associated serine/threonine-protein kinase 4 OS=Homo sapiens GN=MAST4 PE=1 SV=2 - [MAST4_HUMAN]	O15021	S2283	Microtubule-associated serine/threonine-protein kinase 4 (EC 2.7.11.1)	MAST4 KIAA0303	PEKSLSCSSSFPETR			SLSCpSSSFPETR	1	S(1): 0.0; S(3): 0.5; S(5): 99.1; S(6): 0.5; S(7): 0.0; T(11): 0.0	170	Forward	Class I
O15021	1	Microtubule-associated serine/threonine-protein kinase 4 OS=Homo sapiens GN=MAST4 PE=1 SV=2 - [MAST4_HUMAN]	O15021	S2339	Microtubule-associated serine/threonine-protein kinase 4 (EC 2.7.11.1)	MAST4 KIAA0303	GRTHMTKSDSLPSFR			pSDSLPSFR	1	S(1): 99.5; S(3): 0.5; S(6): 0.0	95	Forward	Class I
O15021	1	Microtubule-associated serine/threonine-protein kinase 4 OS=Homo sapiens GN=MAST4 PE=1 SV=2 - [MAST4_HUMAN]	O15021	S2341	Microtubule-associated serine/threonine-protein kinase 4 (EC 2.7.11.1)	MAST4 KIAA0303	THMTKSDSLPSFRVS			SDpSLPSFR	1	S(1): 0.0; S(3): 99.9; S(6): 0.1	82	Forward	Class I
O15027	1	Protein transport protein Sec16A OS=Homo sapiens GN=SEC16A PE=1 SV=3 - [SC16A_HUMAN]	O15027	S136	Protein transport protein Sec16A (SEC16 homolog A)	SEC16A KIAA0310 SEC16 SEC16L	RIVNHWASPELRQNP			IVNHWApSPELR	1	S(7): 100.0	181	Forward	Class I
O15027	1	Protein transport protein Sec16A OS=Homo sapiens GN=SEC16A PE=1 SV=3 - [SC16A_HUMAN]	O15027	S153	Protein transport protein Sec16A (SEC16 homolog A)	SEC16A KIAA0310 SEC16 SEC16L	KNEHRPASALVNPLA			NEHRPApSALVNPLAR	1	S(7): 100.0	225	Forward	Class I
O15027	1	Protein transport protein Sec16A OS=Homo sapiens GN=SEC16A PE=1 SV=3 - [SC16A_HUMAN]	O15027	S391	Protein transport protein Sec16A (SEC16 homolog A)	SEC16A KIAA0310 SEC16 SEC16L	FFKQIDSSPVGGETD	STE/STE11	MAP3K3	QIDSpSPVGGETDETTVSQNYR	1	S(4): 0.6; S(5): 99.4; T(11): 0.0; T(14): 0.0; T(15): 0.0; S(17): 0.0; Y(20): 0.0	384	Forward	Class I
O15027	1	Protein transport protein Sec16A OS=Homo sapiens GN=SEC16A PE=1 SV=3 - [SC16A_HUMAN]	O15027	S417	Protein transport protein Sec16A (SEC16 homolog A)	SEC16A KIAA0310 SEC16 SEC16L	VSQPSTPSPPKPTGI			GSVSQPSTPpSPPKPTGIFQTSANSSFEPVK	1	S(2): 0.0; S(4): 0.0; S(7): 1.0; T(8): 1.0; S(10): 94.1; T(15): 1.0; T(20): 1.0; S(21): 1.0; S(24): 1.0; S(25): 0.0	145	Forward	Class I
O15027	1	Protein transport protein Sec16A OS=Homo sapiens GN=SEC16A PE=1 SV=3 - [SC16A_HUMAN]	O15027	S431	Protein transport protein Sec16A (SEC16 homolog A)	SEC16A KIAA0310 SEC16 SEC16L	IFQTSANSSFEPVKS			GSVSQPSTPSPPKPTGIFQTSANpSSFEPVK	1	S(2): 0.0; S(4): 0.0; S(7): 0.0; T(8): 0.0; S(10): 1.7; T(15): 1.7; T(20): 1.7; S(21): 1.7; S(24): 91.6; S(25): 1.7	108	Forward	Class I
O15027	1	Protein transport protein Sec16A OS=Homo sapiens GN=SEC16A PE=1 SV=3 - [SC16A_HUMAN]	O15027	S891	Protein transport protein Sec16A (SEC16 homolog A)	SEC16A KIAA0310 SEC16 SEC16L	VPPQQQASPPQLPKA			AQQELVPPQQQApSPPQLPK	1	S(13): 100.0	195	Forward	Class I
O15027	1	Protein transport protein Sec16A OS=Homo sapiens GN=SEC16A PE=1 SV=3 - [SC16A_HUMAN]	O15027	S1786	Protein transport protein Sec16A (SEC16 homolog A)	SEC16A KIAA0310 SEC16 SEC16L	LPDGPLASPARVPMF			LLPSAPQTLPDGPLApSPAR	1	S(4): 0.0; T(8): 0.0; S(16): 100.0	99	Forward	Class I
O15027	1	Protein transport protein Sec16A OS=Homo sapiens GN=SEC16A PE=1 SV=3 - [SC16A_HUMAN]	O15027	T1876	Protein transport protein Sec16A (SEC16 homolog A)	SEC16A KIAA0310 SEC16 SEC16L	DGKFANLTPSRTVPD			FANLpTPSR	1	T(5): 99.0; S(7): 1.0	67	Forward	Class I
O15027	1	Protein transport protein Sec16A OS=Homo sapiens GN=SEC16A PE=1 SV=3 - [SC16A_HUMAN]	O15027	S1905	Protein transport protein Sec16A (SEC16 homolog A)	SEC16A KIAA0310 SEC16 SEC16L	TQPPLSLSPAPETKR			ADSGPTQPPLSLpSPAPETK	1	S(3): 0.0; T(6): 0.0; S(11): 0.0; S(13): 100.0; T(18): 0.0	250	Forward	Class I
O15027	1	Protein transport protein Sec16A OS=Homo sapiens GN=SEC16A PE=1 SV=3 - [SC16A_HUMAN]	O15027	T1910	Protein transport protein Sec16A (SEC16 homolog A)	SEC16A KIAA0310 SEC16 SEC16L	SLSPAPETKRPGQAA			ADSGPTQPPLSLSPAPEpTKRPGQAAK	1	S(3): 0.0; T(6): 0.0; S(11): 0.0; S(13): 0.1; T(18): 99.9	103	Forward	Class I
O15042	1	U2-associated protein SR140 OS=Homo sapiens GN=SR140 PE=1 SV=2 - [SR140_HUMAN]	O15042	S67	U2 snRNP-associated SURP motif-containing protein (140 kDa Ser/Arg-rich domain protein) (U2-associated protein SR140)	U2SURP KIAA0332 SR140	ARESLCDSPHQNLSR			ESLCDpSPHQNLSRPLLENK	1	S(2): 0.0; S(6): 98.3; S(12): 1.7	204	Forward	Class I
O15042	1	U2-associated protein SR140 OS=Homo sapiens GN=SR140 PE=1 SV=2 - [SR140_HUMAN]	O15042	S485	U2 snRNP-associated SURP motif-containing protein (140 kDa Ser/Arg-rich domain protein) (U2-associated protein SR140)	U2SURP KIAA0332 SR140	YSILQGDSPTKWRTE			LYSILQGDpSPTK	1	Y(2): 0.0; S(3): 0.0; S(9): 100.0; T(11): 0.0	173	Forward	Class I
O15050	1	Lupus brain antigen 1 homolog OS=Homo sapiens GN=LBA1 PE=2 SV=4 - [LBA1_HUMAN]	O15050	T877	TPR and ankyrin repeat-containing protein 1 (Lupus brain antigen 1 homolog)	TRANK1 KIAA0342 LBA1	NPEKIIATEQNTCAM			IIApTEQNTCAMEKSGR	1	T(4): 100.0; T(8): 0.0; S(14): 0.0	79	Forward	Class I
O15050	1	Lupus brain antigen 1 homolog OS=Homo sapiens GN=LBA1 PE=2 SV=4 - [LBA1_HUMAN]	O15050	S1439	TPR and ankyrin repeat-containing protein 1 (Lupus brain antigen 1 homolog)	TRANK1 KIAA0342 LBA1	FRFSDLRSLFHYASR			pSLFHpYASR	2	S(1): 100.0; Y(5): 100.0; S(7): 0.0	95	Forward	Class I
O15050	1	Lupus brain antigen 1 homolog OS=Homo sapiens GN=LBA1 PE=2 SV=4 - [LBA1_HUMAN]	O15050	Y1443	TPR and ankyrin repeat-containing protein 1 (Lupus brain antigen 1 homolog)	TRANK1 KIAA0342 LBA1	DLRSLFHYASRNTID			pSLFHpYASR	2	S(1): 100.0; Y(5): 100.0; S(7): 0.0	95	Forward	Class I
O15054	1	Histone demethylase JMJD3 OS=Homo sapiens GN=JMJD3 PE=1 SV=3 - [JMJD3_HUMAN]	O15054	S1118	Lysine-specific demethylase 6B (EC 1.14.11.-) (JmjC domain-containing protein 3) (Jumonji domain-containing protein 3) (Lysine demethylase 6B)	KDM6B JMJD3 KIAA0346	DKETFIASEVEERRL			ETFIApSEVEER	1	T(2): 0.0; S(6): 100.0	64	Forward	Class I
O15056	1	Synaptojanin-2 OS=Homo sapiens GN=SYNJ2 PE=1 SV=3 - [SYNJ2_HUMAN]	O15056	S1124	Synaptojanin-2 (EC 3.1.3.36) (Synaptic inositol 1,4,5-trisphosphate 5-phosphatase 2)	SYNJ2 KIAA0348	LMVKKSASDASISSG			SApSDASISSGTHGQYSILQTAR	1	S(1): 0.8; S(3): 99.2; S(6): 0.0; S(8): 0.0; S(9): 0.0; T(11): 0.0; Y(15): 0.0; S(16): 0.0; T(20): 0.0	248	Forward	Class I
O15061	1	Desmuslin OS=Homo sapiens GN=DMN PE=1 SV=2 - [DMN_HUMAN]	O15061	S1044	Synemin (Desmuslin)	SYNM DMN KIAA0353 SYN	ESLSRQRSPAPGSPD	CAMK/PKD	PKD1	QRpSPAPGpSPDEEGGAEAPAAGIR	2	S(3): 100.0; S(8): 100.0	79	Forward	Class I
O15061	1	Desmuslin OS=Homo sapiens GN=DMN PE=1 SV=2 - [DMN_HUMAN]	O15061	S1049	Synemin (Desmuslin)	SYNM DMN KIAA0353 SYN	QRSPAPGSPDEEGGA	CMGC/MAPK	Erk1	QRpSPAPGpSPDEEGGAEAPAAGIR	2	S(3): 100.0; S(8): 100.0	79	Forward	Class I
O15063	1	Uncharacterized protein KIAA0355 OS=Homo sapiens GN=KIAA0355 PE=2 SV=2 - [K0355_HUMAN]	O15063	Y110	Uncharacterized protein KIAA0355	KIAA0355	TVFRNSHYSKAATQL			NSHpYSKAApTQLK	2	S(2): 1.5; Y(4): 97.1; S(5): 1.7; T(9): 99.8	99	Forward	Class I
O15063	1	Uncharacterized protein KIAA0355 OS=Homo sapiens GN=KIAA0355 PE=2 SV=2 - [K0355_HUMAN]	O15063	T115	Uncharacterized protein KIAA0355	KIAA0355	SHYSKAATQLKDVQE			NSHpYSKAApTQLK	2	S(2): 1.5; Y(4): 97.1; S(5): 1.7; T(9): 99.8	99	Forward	Class I
O15063	1	Uncharacterized protein KIAA0355 OS=Homo sapiens GN=KIAA0355 PE=2 SV=2 - [K0355_HUMAN]	O15063	S723	Uncharacterized protein KIAA0355	KIAA0355	GLAPQQQSPKQQQPQ			APQAGAHTPLTPQPGLAPQQQpSPK	1	T(8): 0.0; T(11): 0.0; S(22): 100.0	108	Forward	Class I
O15075	1	Serine/threonine-protein kinase DCLK1 OS=Homo sapiens GN=DCLK1 PE=1 SV=2 - [DCLK1_HUMAN]	O15075	S32	Serine/threonine-protein kinase DCLK1 (EC 2.7.11.1) (Doublecortin domain-containing protein 3A) (Doublecortin-like and CAM kinase-like 1) (Doublecortin-like kinase 1)	DCLK1 DCAMKL1 DCDC3A KIAA0369	SRVNGLPSPTHSAHC			VNGLPpSPTHSAHCSFYR	1	S(6): 100.0; T(8): 0.0; S(10): 0.0; S(14): 0.0; Y(16): 0.0	146	Forward	Class I
O15075	1	Serine/threonine-protein kinase DCLK1 OS=Homo sapiens GN=DCLK1 PE=1 SV=2 - [DCLK1_HUMAN]	O15075	S36	Serine/threonine-protein kinase DCLK1 (EC 2.7.11.1) (Doublecortin domain-containing protein 3A) (Doublecortin-like and CAM kinase-like 1) (Doublecortin-like kinase 1)	DCLK1 DCAMKL1 DCDC3A KIAA0369	GLPSPTHSAHCSFYR			VNGLPpSPTHpSAHCSFYR	2	S(6): 94.3; T(8): 5.7; S(10): 100.0; S(14): 0.0; Y(16): 0.0	145	Forward	Class I
O15085	1	Rho guanine nucleotide exchange factor 11 OS=Homo sapiens GN=ARHGEF11 PE=1 SV=1 - [ARHGB_HUMAN]	O15085	S556	Rho guanine nucleotide exchange factor 11 (PDZ-RhoGEF)	ARHGEF11 KIAA0380	STFHIPLSPVEVKPG			SSSQSTFHIPLpSPVEVKPGNVR	1	S(1): 0.0; S(2): 0.0; S(3): 0.0; S(5): 0.0; T(6): 0.0; S(12): 100.0	198	Forward	Class I
O15085	1	Rho guanine nucleotide exchange factor 11 OS=Homo sapiens GN=ARHGEF11 PE=1 SV=1 - [ARHGB_HUMAN]	O15085	S614	Rho guanine nucleotide exchange factor 11 (PDZ-RhoGEF)	ARHGEF11 KIAA0380	IRLGRSESLKGREEM			SEpSLKGREEMK	1	S(1): 0.0; S(3): 100.0	222	Forward	Class I
O15085	1	Rho guanine nucleotide exchange factor 11 OS=Homo sapiens GN=ARHGEF11 PE=1 SV=1 - [ARHGB_HUMAN]	O15085	T668	Rho guanine nucleotide exchange factor 11 (PDZ-RhoGEF)	ARHGEF11 KIAA0380	TRSLENPTPPFTPKM			SLENPpTPPFpTPK	2	S(1): 0.0; T(6): 100.0; T(10): 100.0	137	Forward	Class I
O15085	1	Rho guanine nucleotide exchange factor 11 OS=Homo sapiens GN=ARHGEF11 PE=1 SV=1 - [ARHGB_HUMAN]	O15085	T672	Rho guanine nucleotide exchange factor 11 (PDZ-RhoGEF)	ARHGEF11 KIAA0380	ENPTPPFTPKMGRRS			SLENPpTPPFpTPK	2	S(1): 0.0; T(6): 100.0; T(10): 100.0	137	Forward	Class I
O15085	1	Rho guanine nucleotide exchange factor 11 OS=Homo sapiens GN=ARHGEF11 PE=1 SV=1 - [ARHGB_HUMAN]	O15085	T1292	Rho guanine nucleotide exchange factor 11 (PDZ-RhoGEF)	ARHGEF11 KIAA0380	LEHLPPRTRNSGIWE			pTRNSGIWESPELDR	1	T(1): 100.0; S(4): 0.0; S(9): 0.0	99	Forward	Class I
O15085	1	Rho guanine nucleotide exchange factor 11 OS=Homo sapiens GN=ARHGEF11 PE=1 SV=1 - [ARHGB_HUMAN]	O15085	S1295	Rho guanine nucleotide exchange factor 11 (PDZ-RhoGEF)	ARHGEF11 KIAA0380	LPPRTRNSGIWESPE			TRNpSGIWESPELDR	1	T(1): 0.0; S(4): 100.0; S(9): 0.0	318	Forward	Class I
O15085	1	Rho guanine nucleotide exchange factor 11 OS=Homo sapiens GN=ARHGEF11 PE=1 SV=1 - [ARHGB_HUMAN]	O15085	S1458	Rho guanine nucleotide exchange factor 11 (PDZ-RhoGEF)	ARHGEF11 KIAA0380	KSLGGESSGGTTPVG			SLGGESpSGGTTPVGSFHTEAAR	1	S(1): 0.0; S(6): 0.0; S(7): 100.0; T(10): 0.0; T(11): 0.0; S(15): 0.0; T(18): 0.0	268	Forward	Class I
O15085	1	Rho guanine nucleotide exchange factor 11 OS=Homo sapiens GN=ARHGEF11 PE=1 SV=1 - [ARHGB_HUMAN]	O15085	S1480	Rho guanine nucleotide exchange factor 11 (PDZ-RhoGEF)	ARHGEF11 KIAA0380	RWTDGSLSPPAKEPL			WTDGSLpSPPAKEPLASDSR	1	T(2): 0.0; S(5): 0.0; S(7): 100.0; S(16): 0.0; S(18): 0.0	338	Forward	Class I
O15116	1	U6 snRNA-associated Sm-like protein LSm1 OS=Homo sapiens GN=LSM1 PE=1 SV=1 - [LSM1_HUMAN]	O15116	S123	U6 snRNA-associated Sm-like protein LSm1 (Cancer-associated Sm-like) (Small nuclear ribonuclear CaSm)	LSM1 CASM	ALKDRGLSIPRADTL			GLpSIPR	1	S(3): 100.0	97	Forward	Class I
O15127	1	Secretory carrier-associated membrane protein 2 OS=Homo sapiens GN=SCAMP2 PE=1 SV=2 - [SCAM2_HUMAN]	O15127	T109	Secretory carrier-associated membrane protein 2 (Secretory carrier membrane protein 2)	SCAMP2	KERELQNTVANLHVR			ERELQNpTVANLHVR	1	T(7): 100.0	136	Forward	Class I
O15127	1	Secretory carrier-associated membrane protein 2 OS=Homo sapiens GN=SCAMP2 PE=1 SV=2 - [SCAM2_HUMAN]	O15127	S319	Secretory carrier-associated membrane protein 2 (Secretory carrier membrane protein 2)	SCAMP2	RTFHRAASSAAQGAF			AApSSAAQGAFQGN	1	S(3): 99.2; S(4): 0.8	178	Forward	Class I
O15143	1	Actin-related protein 2/3 complex subunit 1B OS=Homo sapiens GN=ARPC1B PE=1 SV=3 - [ARC1B_HUMAN]	O15143	S310	Actin-related protein 2/3 complex subunit 1B (Arp2/3 complex 41 kDa subunit) (p41-ARC)	ARPC1B ARC41	QNLDKKASSEGGTAA	STE/STE20	HGK, PAK1	KApSSEGGTAAGAGLDSLHK	1	S(3): 100.0; S(4): 0.0; T(8): 0.0; S(16): 0.0	269	Forward	Class I
O15155	1	BET1 homolog OS=Homo sapiens GN=BET1 PE=1 SV=1 - [BET1_HUMAN]	O15155	S50	BET1 homolog (hBET1) (Golgi vesicular membrane-trafficking protein p18)	BET1	VTAIKSLSIEIGHEV			SLpSIEIGHEVK	1	S(1): 0.0; S(3): 100.0	257	Forward	Class I
O15164	1	Transcription intermediary factor 1-alpha OS=Homo sapiens GN=TRIM24 PE=1 SV=3 - [TIF1A_HUMAN]	O15164	S654	Transcription intermediary factor 1-alpha (TIF1-alpha) (EC 6.3.2.-) (E3 ubiquitin-protein ligase TRIM24) (RING finger protein 82) (Tripartite motif-containing protein 24)	TRIM24 RNF82 TIF1 TIF1A	HGQPRPPSNRTVQSP			DTNIDHGQPRPPpSNR	1	T(2): 0.0; S(13): 100.0	213	Forward	Class I
O15164	1	Transcription intermediary factor 1-alpha OS=Homo sapiens GN=TRIM24 PE=1 SV=3 - [TIF1A_HUMAN]	O15164	S811	Transcription intermediary factor 1-alpha (TIF1-alpha) (EC 6.3.2.-) (E3 ubiquitin-protein ligase TRIM24) (RING finger protein 82) (Tripartite motif-containing protein 24)	TRIM24 RNF82 TIF1 TIF1A	WLDPSQKSPLHVGET	Atypical/PIKK/FRAP	FRAP	SEWLDPSQKpSPLHVGETR	1	S(1): 0.0; S(7): 0.0; S(10): 100.0; T(17): 0.0	237	Forward	Class I
O15164	1	Transcription intermediary factor 1-alpha OS=Homo sapiens GN=TRIM24 PE=1 SV=3 - [TIF1A_HUMAN]	O15164	S1025	Transcription intermediary factor 1-alpha (TIF1-alpha) (EC 6.3.2.-) (E3 ubiquitin-protein ligase TRIM24) (RING finger protein 82) (Tripartite motif-containing protein 24)	TRIM24 RNF82 TIF1 TIF1A	ESEDNKFSDDSDDDF			NESEDNKFpSDDpSDDDFVQPR	2	S(3): 0.0; S(9): 100.0; S(12): 100.0	90	Forward	Class I
O15164	1	Transcription intermediary factor 1-alpha OS=Homo sapiens GN=TRIM24 PE=1 SV=3 - [TIF1A_HUMAN]	O15164	S1028	Transcription intermediary factor 1-alpha (TIF1-alpha) (EC 6.3.2.-) (E3 ubiquitin-protein ligase TRIM24) (RING finger protein 82) (Tripartite motif-containing protein 24)	TRIM24 RNF82 TIF1 TIF1A	DNKFSDDSDDDFVQP			NESEDNKFpSDDpSDDDFVQPR	2	S(3): 0.0; S(9): 100.0; S(12): 100.0	90	Forward	Class I
O15169	1	Axin-1 OS=Homo sapiens GN=AXIN1 PE=1 SV=2 - [AXN1_HUMAN]	O15169	S77	Axin-1 (Axis inhibition protein 1) (hAxin)	AXIN1 AXIN	YEPEGSASPTPPYLK	CMGC/DYRK	HIPK2	RSDLDLGYEPEGSApSPTPPYLK	1	S(2): 0.0; Y(8): 0.0; S(13): 0.0; S(15): 100.0; T(17): 0.0; Y(20): 0.0	272	Forward	Class I
O15169	1	Axin-1 OS=Homo sapiens GN=AXIN1 PE=1 SV=2 - [AXN1_HUMAN]	O15169	S217	Axin-1 (Axis inhibition protein 1) (hAxin)	AXIN1 AXIN	YTRTGSESPKVCSDQ	CMGC/DYRK	HIPK2	TGSEpSPKVCSDQSSGSGTGK	1	T(1): 0.0; S(3): 0.0; S(5): 100.0; S(10): 0.0; S(13): 0.0; S(14): 0.0; S(16): 0.0; T(18): 0.0	286	Forward	Class I
O15173	1	Membrane-associated progesterone receptor component 2 OS=Homo sapiens GN=PGRMC2 PE=1 SV=1 - [PGRC2_HUMAN]	O15173	S104	Membrane-associated progesterone receptor component 2 (Progesterone membrane-binding protein) (Steroid receptor protein DG6)	PGRMC2 DG6 PMBP	RMKKRDFSLEQLRQY			KRDFpSLEQLR	1	S(5): 100.0	212	Forward	Class I
O15173	1	Membrane-associated progesterone receptor component 2 OS=Homo sapiens GN=PGRMC2 PE=1 SV=1 - [PGRC2_HUMAN]	O15173	S208	Membrane-associated progesterone receptor component 2 (Progesterone membrane-binding protein) (Steroid receptor protein DG6)	PGRMC2 DG6 PMBP	LKPGEEPSEYTDEED			LLKPGEEPpSEYpTDEEDTK	2	S(9): 100.0; Y(11): 1.3; T(12): 98.8; T(17): 0.0	162	Forward	Class I
O15173	1	Membrane-associated progesterone receptor component 2 OS=Homo sapiens GN=PGRMC2 PE=1 SV=1 - [PGRC2_HUMAN]	O15173	Y210	Membrane-associated progesterone receptor component 2 (Progesterone membrane-binding protein) (Steroid receptor protein DG6)	PGRMC2 DG6 PMBP	PGEEPSEYTDEEDTK			LLKPGEEPSEpYTDEEDTK	1	S(9): 0.0; Y(11): 94.4; T(12): 5.6; T(17): 0.0	199	Forward	Class I
O15173	1	Membrane-associated progesterone receptor component 2 OS=Homo sapiens GN=PGRMC2 PE=1 SV=1 - [PGRC2_HUMAN]	O15173	T211	Membrane-associated progesterone receptor component 2 (Progesterone membrane-binding protein) (Steroid receptor protein DG6)	PGRMC2 DG6 PMBP	GEEPSEYTDEEDTKD			LLKPGEEPSEYpTDEEDTK	1	S(9): 0.0; Y(11): 0.0; T(12): 100.0; T(17): 0.0	302	Forward	Class I
O15173	1	Membrane-associated progesterone receptor component 2 OS=Homo sapiens GN=PGRMC2 PE=1 SV=1 - [PGRC2_HUMAN]	O15173	T216	Membrane-associated progesterone receptor component 2 (Progesterone membrane-binding protein) (Steroid receptor protein DG6)	PGRMC2 DG6 PMBP	EYTDEEDTKDHNKQD			LLKPGEEPSEYTDEEDpTKDHNK	1	S(9): 0.1; Y(11): 2.6; T(12): 2.6; T(17): 94.6	126	Forward	Class I
O15226	1	NF-kappa-B-repressing factor OS=Homo sapiens GN=NKRF PE=1 SV=2 - [NKRF_HUMAN]	O15226	T191	NF-kappa-B-repressing factor (NFkB-repressing factor) (Protein ITBA4) (Transcription factor NRF)	NKRF ITBA4 NRF	NLSNPEMTSGSDKIN			NLSNPEMpTSGSDK	1	S(3): 0.0; T(8): 93.5; S(9): 6.1; S(11): 0.4	103	Forward	Class I
O15230	1	Laminin subunit alpha-5 OS=Homo sapiens GN=LAMA5 PE=2 SV=5 - [LAMA5_HUMAN]	O15230	T1176	Laminin subunit alpha-5 (Laminin-10 subunit alpha) (Laminin-11 subunit alpha) (Laminin-15 subunit alpha)	LAMA5 KIAA0533 KIAA1907	SEASVRLTAEQARFF			LpTAEQAR	1	T(2): 100.0	87	Forward	Class I
O15231	1	Zinc finger protein 185 OS=Homo sapiens GN=ZNF185 PE=1 SV=2 - [ZN185_HUMAN]	O15231	S17	Zinc finger protein 185 (LIM domain protein ZNF185) (P1-A)	ZNF185	APYNIRRSSTSGDTE			RpSSTSGDpTEEEEEEEVVPFSSDEQK	2	S(2): 98.5; S(3): 0.8; T(4): 0.8; S(5): 0.8; T(8): 99.2; S(20): 0.0; S(21): 0.0	336	Forward	Class I
O15231	1	Zinc finger protein 185 OS=Homo sapiens GN=ZNF185 PE=1 SV=2 - [ZN185_HUMAN]	O15231	T23	Zinc finger protein 185 (LIM domain protein ZNF185) (P1-A)	ZNF185	RSSTSGDTEEEEEEE			SSTSGDpTEEEEEEEVVPFSSDEQK	1	S(1): 0.0; S(2): 0.0; T(3): 0.0; S(4): 0.0; T(7): 100.0; S(19): 0.0; S(20): 0.0	409	Forward	Class I
O15231	1	Zinc finger protein 185 OS=Homo sapiens GN=ZNF185 PE=1 SV=2 - [ZN185_HUMAN]	O15231	T69	Zinc finger protein 185 (LIM domain protein ZNF185) (P1-A)	ZNF185	LSAAKKSTGSPTQET			SpTGSPTQETQAPFIAK	1	S(1): 5.0; T(2): 89.6; S(4): 5.0; T(6): 0.3; T(9): 0.0	121	Forward	Class I
O15231	1	Zinc finger protein 185 OS=Homo sapiens GN=ZNF185 PE=1 SV=2 - [ZN185_HUMAN]	O15231	S71	Zinc finger protein 185 (LIM domain protein ZNF185) (P1-A)	ZNF185	AAKKSTGSPTQETQA			KSTGpSPTQETQAPFIAK	1	S(2): 0.0; T(3): 0.0; S(5): 100.0; T(7): 0.0; T(10): 0.0	397	Forward	Class I
O15231	1	Zinc finger protein 185 OS=Homo sapiens GN=ZNF185 PE=1 SV=2 - [ZN185_HUMAN]	O15231	S156	Zinc finger protein 185 (LIM domain protein ZNF185) (P1-A)	ZNF185	AVPADRKSNSTAAQE			pSNSTAAQEDAKADPK	1	S(1): 98.4; S(3): 1.4; T(4): 0.2	106	Forward	Class I
O15231	1	Zinc finger protein 185 OS=Homo sapiens GN=ZNF185 PE=1 SV=2 - [ZN185_HUMAN]	O15231	T215	Zinc finger protein 185 (LIM domain protein ZNF185) (P1-A)	ZNF185	QQPADPSTPERQSSP			GGQGDPAVPAQQPADPSpTPER	1	S(17): 0.0; T(18): 100.0	216	Forward	Class I
O15231	1	Zinc finger protein 185 OS=Homo sapiens GN=ZNF185 PE=1 SV=2 - [ZN185_HUMAN]	O15231	S221	Zinc finger protein 185 (LIM domain protein ZNF185) (P1-A)	ZNF185	STPERQSSPSGSEQL			QSpSPSGSEQLVR	1	S(2): 0.5; S(3): 99.5; S(5): 0.0; S(7): 0.0	170	Forward	Class I
O15231	1	Zinc finger protein 185 OS=Homo sapiens GN=ZNF185 PE=1 SV=2 - [ZN185_HUMAN]	O15231	S233	Zinc finger protein 185 (LIM domain protein ZNF185) (P1-A)	ZNF185	EQLVRRESCGSSVLT			REpSCGSSVLTDFEGK	1	S(3): 100.0; S(6): 0.0; S(7): 0.0; T(10): 0.0	348	Forward	Class I
O15234	1	Protein CASC3 OS=Homo sapiens GN=CASC3 PE=1 SV=2 - [CASC3_HUMAN]	O15234	S45	Protein CASC3 (Cancer susceptibility candidate gene 3 protein) (Metastatic lymph node gene 51 protein) (MLN 51) (Protein barentsz) (Btz)	CASC3 MLN51	GSAGGGGSGSLPSQR			GGGSCSGSAGGGGpSGSLPSQR	1	S(4): 0.0; S(6): 0.0; S(8): 0.0; S(14): 100.0; S(16): 0.0; S(19): 0.0	236	Forward	Class I
O15234	1	Protein CASC3 OS=Homo sapiens GN=CASC3 PE=1 SV=2 - [CASC3_HUMAN]	O15234	S148	Protein CASC3 (Cancer susceptibility candidate gene 3 protein) (Metastatic lymph node gene 51 protein) (MLN 51) (Protein barentsz) (Btz)	CASC3 MLN51	TVTGERQSGDGQEST			STVTGERQpSGDGQESTEPVENK	1	S(1): 0.0; T(2): 0.0; T(4): 0.0; S(9): 100.0; S(15): 0.0; T(16): 0.0	327	Forward	Class I
O15234	1	Protein CASC3 OS=Homo sapiens GN=CASC3 PE=1 SV=2 - [CASC3_HUMAN]	O15234	Y263	Protein CASC3 (Cancer susceptibility candidate gene 3 protein) (Metastatic lymph node gene 51 protein) (MLN 51) (Protein barentsz) (Btz)	CASC3 MLN51	RRIRKPRYGSPPQRD			pYGSPPQRDPNWNGER	1	Y(1): 100.0; S(3): 0.0	236	Forward	Class I
O15234	1	Protein CASC3 OS=Homo sapiens GN=CASC3 PE=1 SV=2 - [CASC3_HUMAN]	O15234	S265	Protein CASC3 (Cancer susceptibility candidate gene 3 protein) (Metastatic lymph node gene 51 protein) (MLN 51) (Protein barentsz) (Btz)	CASC3 MLN51	IRKPRYGSPPQRDPN			YGpSPPQRDPNWNGER	1	Y(1): 0.0; S(3): 100.0	217	Forward	Class I
O15234	1	Protein CASC3 OS=Homo sapiens GN=CASC3 PE=1 SV=2 - [CASC3_HUMAN]	O15234	S363	Protein CASC3 (Cancer susceptibility candidate gene 3 protein) (Metastatic lymph node gene 51 protein) (MLN 51) (Protein barentsz) (Btz)	CASC3 MLN51	QTSVRDPSPEADAPV			RLEQTSVRDPpSPEADAPVLGSPEK	1	T(5): 0.0; S(6): 0.0; S(11): 100.0; S(21): 0.0	178	Forward	Class I
O15258	1	Protein RER1 OS=Homo sapiens GN=RER1 PE=2 SV=1 - [RER1_HUMAN]	O15258	S95	Protein RER1	RER1	DPSLMEDSDDGPSLP			VDPSLMEDpSDDGPSLPTK	1	S(4): 0.0; S(9): 100.0; S(14): 0.0; T(17): 0.0	254	Forward	Class I
O15320	1	Cutaneous T-cell lymphoma-associated antigen 5 OS=Homo sapiens GN=CTAGE5 PE=1 SV=2 - [CTGE5_HUMAN]	O15320	S522	Cutaneous T-cell lymphoma-associated antigen 5 (Protein cTAGE-5) (Meningioma-expressed antigen 6/11) (cTAGE family member 5)	CTAGE5 MEA11 MEA6 MGEA11 MGEA6	EHSPYGPSPLGWPSS	CMGC	MOK	EHSPYGPpSPLGWPSSETR	1	S(3): 0.0; Y(5): 0.0; S(8): 100.0; S(14): 0.0; S(15): 0.0; T(17): 0.0	240	Forward	Class I
O15320	1	Cutaneous T-cell lymphoma-associated antigen 5 OS=Homo sapiens GN=CTAGE5 PE=1 SV=2 - [CTGE5_HUMAN]	O15320	S536	Cutaneous T-cell lymphoma-associated antigen 5 (Protein cTAGE-5) (Meningioma-expressed antigen 6/11) (cTAGE family member 5)	CTAGE5 MEA11 MEA6 MGEA11 MGEA6	SETRAFLSPPTLLEG	CMGC	MOK	AFLpSPPTLLEGPLR	1	S(4): 100.0; T(7): 0.0	152	Forward	Class I
O15320	1	Cutaneous T-cell lymphoma-associated antigen 5 OS=Homo sapiens GN=CTAGE5 PE=1 SV=2 - [CTGE5_HUMAN]	O15320	S635	Cutaneous T-cell lymphoma-associated antigen 5 (Protein cTAGE-5) (Meningioma-expressed antigen 6/11) (cTAGE family member 5)	CTAGE5 MEA11 MEA6 MGEA11 MGEA6	CSNSGRLSGPAELRS			FCSNSGRLpSGPAELR	1	S(3): 0.0; S(5): 0.0; S(9): 100.0	307	Forward	Class I
O15320;Q96RT6	2	Cutaneous T-cell lymphoma-associated antigen 5 OS=Homo sapiens GN=CTAGE5 PE=1 SV=2 - [CTGE5_HUMAN]|Protein cTAGE-2 OS=Homo sapiens GN=CTAGE1 PE=2 SV=1 - [CTGE2_HUMAN]	O15320	S647	Cutaneous T-cell lymphoma-associated antigen 5 (Protein cTAGE-5) (Meningioma-expressed antigen 6/11) (cTAGE family member 5)	CTAGE5 MEA11 MEA6 MGEA11 MGEA6	LRSFNMPSLDKMDGS			SFNMPpSLDK	1	S(1): 0.0; S(6): 100.0	106	Forward	Class I	Q96RT6	S616	Protein cTAGE-2 (Cancer/testis antigen 21.2) (CT21.2)	CTAGE1 CTAGE2
O15344	1	Midline-1 OS=Homo sapiens GN=MID1 PE=1 SV=1 - [TRI18_HUMAN]	O15344	S96	Midline-1 (EC 6.3.2.-) (Midin) (Midline 1 RING finger protein) (Putative transcription factor XPRF) (RING finger protein 59) (Tripartite motif-containing protein 18)	MID1 FXY RNF59 TRIM18 XPRF	ASVSGPNSPSETRRE	STE/STE-Unique/NIK	NIK	ASVSGPNpSPSETRR	1	S(2): 0.0; S(4): 0.0; S(8): 99.1; S(10): 0.9; T(12): 0.0	161	Forward	Class I
O15357	1	Phosphatidylinositol-3,4,5-trisphosphate 5-phosphatase 2 OS=Homo sapiens GN=INPPL1 PE=1 SV=1 - [SHIP2_HUMAN]	O15357	S240	Phosphatidylinositol 3,4,5-trisphosphate 5-phosphatase 2 (EC 3.1.3.86) (Inositol polyphosphate phosphatase-like protein 1) (INPPL-1) (Protein 51C) (SH2 domain-containing inositol 5'-phosphatase 2) (SH2 domain-containing inositol phosphatase 2) (SHIP-2)	INPPL1 SHIP2	SKVFDQQSSPMVTRL			VFDQQpSSPMVTR	1	S(6): 95.6; S(7): 4.4; T(11): 0.0	107	Forward	Class I
O15357	1	Phosphatidylinositol-3,4,5-trisphosphate 5-phosphatase 2 OS=Homo sapiens GN=INPPL1 PE=1 SV=1 - [SHIP2_HUMAN]	O15357	S241	Phosphatidylinositol 3,4,5-trisphosphate 5-phosphatase 2 (EC 3.1.3.86) (Inositol polyphosphate phosphatase-like protein 1) (INPPL-1) (Protein 51C) (SH2 domain-containing inositol 5'-phosphatase 2) (SH2 domain-containing inositol phosphatase 2) (SHIP-2)	INPPL1 SHIP2	KVFDQQSSPMVTRLL	CMGC/GSK	GSK3A	VFDQQSpSPMVTR	1	S(6): 0.2; S(7): 99.8; T(11): 0.0	146	Forward	Class I
O15357	1	Phosphatidylinositol-3,4,5-trisphosphate 5-phosphatase 2 OS=Homo sapiens GN=INPPL1 PE=1 SV=1 - [SHIP2_HUMAN]	O15357	T319	Phosphatidylinositol 3,4,5-trisphosphate 5-phosphatase 2 (EC 3.1.3.86) (Inositol polyphosphate phosphatase-like protein 1) (INPPL-1) (Protein 51C) (SH2 domain-containing inositol 5'-phosphatase 2) (SH2 domain-containing inositol phosphatase 2) (SHIP-2)	INPPL1 SHIP2	FEVKLDVTLGDLTKI			LDVpTLGDLpTKIGKpSQK	3	T(4): 100.0; T(9): 100.0; S(14): 100.0	89	Forward	Class I
O15357	1	Phosphatidylinositol-3,4,5-trisphosphate 5-phosphatase 2 OS=Homo sapiens GN=INPPL1 PE=1 SV=1 - [SHIP2_HUMAN]	O15357	T324	Phosphatidylinositol 3,4,5-trisphosphate 5-phosphatase 2 (EC 3.1.3.86) (Inositol polyphosphate phosphatase-like protein 1) (INPPL-1) (Protein 51C) (SH2 domain-containing inositol 5'-phosphatase 2) (SH2 domain-containing inositol phosphatase 2) (SHIP-2)	INPPL1 SHIP2	DVTLGDLTKIGKSQK			LDVpTLGDLpTKIGKpSQK	3	T(4): 100.0; T(9): 100.0; S(14): 100.0	89	Forward	Class I
O15357	1	Phosphatidylinositol-3,4,5-trisphosphate 5-phosphatase 2 OS=Homo sapiens GN=INPPL1 PE=1 SV=1 - [SHIP2_HUMAN]	O15357	S329	Phosphatidylinositol 3,4,5-trisphosphate 5-phosphatase 2 (EC 3.1.3.86) (Inositol polyphosphate phosphatase-like protein 1) (INPPL-1) (Protein 51C) (SH2 domain-containing inositol 5'-phosphatase 2) (SH2 domain-containing inositol phosphatase 2) (SHIP-2)	INPPL1 SHIP2	DLTKIGKSQKFTLSV			LDVpTLGDLpTKIGKpSQK	3	T(4): 100.0; T(9): 100.0; S(14): 100.0	89	Forward	Class I
O15372	1	Eukaryotic translation initiation factor 3 subunit H OS=Homo sapiens GN=EIF3H PE=1 SV=1 - [EIF3H_HUMAN]	O15372	S183	Eukaryotic translation initiation factor 3 subunit H (eIF3h) (Eukaryotic translation initiation factor 3 subunit 3) (eIF-3-gamma) (eIF3 p40 subunit)	EIF3H EIF3S3	VCKEKDFSPEALKKA			DFpSPEALK	1	S(3): 100.0	114	Forward	Class I
O15400	1	Syntaxin-7 OS=Homo sapiens GN=STX7 PE=1 SV=4 - [STX7_HUMAN]	O15400	S45	Syntaxin-7	STX7	QLGTPQDSPELRQQL			TLNQLGTPQDpSPELR	1	T(1): 0.0; T(7): 0.0; S(11): 100.0	102	Forward	Class I
O15400	1	Syntaxin-7 OS=Homo sapiens GN=STX7 PE=1 SV=4 - [STX7_HUMAN]	O15400	S126	Syntaxin-7	STX7	VARVRASSRVSGSFP	AGC/AKT	AKT1	ASpSRVpSGSFPEDSSK	2	S(2): 0.0; S(3): 100.0; S(6): 100.0; S(8): 0.0; S(13): 0.0; S(14): 0.0	218	Forward	Class I
O15400	1	Syntaxin-7 OS=Homo sapiens GN=STX7 PE=1 SV=4 - [STX7_HUMAN]	O15400	S129	Syntaxin-7	STX7	VRASSRVSGSFPEDS			ASSRVpSGSFPEDSSK	1	S(2): 0.0; S(3): 0.0; S(6): 100.0; S(8): 0.0; S(13): 0.0; S(14): 0.0	341	Forward	Class I
O15400	1	Syntaxin-7 OS=Homo sapiens GN=STX7 PE=1 SV=4 - [STX7_HUMAN]	O15400	S131	Syntaxin-7	STX7	ASSRVSGSFPEDSSK			VSGpSFPEDSSK	1	S(2): 0.6; S(4): 99.4; S(9): 0.0; S(10): 0.0	128	Forward	Class I
O15417	1	Trinucleotide repeat-containing gene 18 protein OS=Homo sapiens GN=TNRC18 PE=1 SV=3 - [TNC18_HUMAN]	O15417	S263	Trinucleotide repeat-containing gene 18 protein (Long CAG trinucleotide repeat-containing gene 79 protein)	TNRC18 CAGL79 KIAA1856	PRLAERLSPFLAESK			LAERLpSPFLAESK	1	S(6): 100.0; S(12): 0.0	238	Forward	Class I
O15417	1	Trinucleotide repeat-containing gene 18 protein OS=Homo sapiens GN=TNRC18 PE=1 SV=3 - [TNC18_HUMAN]	O15417	S991	Trinucleotide repeat-containing gene 18 protein (Long CAG trinucleotide repeat-containing gene 79 protein)	TNRC18 CAGL79 KIAA1856	GTYGKAVSPPPSPRA			AVpSPPPpSPR	2	S(3): 100.0; S(7): 100.0	65	Forward	Class I
O15417	1	Trinucleotide repeat-containing gene 18 protein OS=Homo sapiens GN=TNRC18 PE=1 SV=3 - [TNC18_HUMAN]	O15417	S995	Trinucleotide repeat-containing gene 18 protein (Long CAG trinucleotide repeat-containing gene 79 protein)	TNRC18 CAGL79 KIAA1856	KAVSPPPSPRASPVA			AVpSPPPpSPR	2	S(3): 100.0; S(7): 100.0	65	Forward	Class I
O15417	1	Trinucleotide repeat-containing gene 18 protein OS=Homo sapiens GN=TNRC18 PE=1 SV=3 - [TNC18_HUMAN]	O15417	S1127	Trinucleotide repeat-containing gene 18 protein (Long CAG trinucleotide repeat-containing gene 79 protein)	TNRC18 CAGL79 KIAA1856	GPERLALSPEDKPIR			LALpSPEDKPIRLpSPSK	2	S(4): 100.0; S(13): 100.0; S(15): 0.0	214	Forward	Class I
O15417	1	Trinucleotide repeat-containing gene 18 protein OS=Homo sapiens GN=TNRC18 PE=1 SV=3 - [TNC18_HUMAN]	O15417	S1136	Trinucleotide repeat-containing gene 18 protein (Long CAG trinucleotide repeat-containing gene 79 protein)	TNRC18 CAGL79 KIAA1856	EDKPIRLSPSKITEP			LALpSPEDKPIRLpSPSK	2	S(4): 100.0; S(13): 100.0; S(15): 0.0	214	Forward	Class I
O15427	1	Monocarboxylate transporter 4 OS=Homo sapiens GN=SLC16A3 PE=1 SV=1 - [MOT4_HUMAN]	O15427	S436	Monocarboxylate transporter 4 (MCT 4) (Solute carrier family 16 member 3)	SLC16A3 MCT4	LHKPPADSGVDLREV	TKL/RAF	RAF1	LHKPPADpSGVDLR	1	S(8): 100.0	104	Forward	Class I
O15427	1	Monocarboxylate transporter 4 OS=Homo sapiens GN=SLC16A3 PE=1 SV=1 - [MOT4_HUMAN]	O15427	S464	Monocarboxylate transporter 4 (MCT 4) (Solute carrier family 16 member 3)	SLC16A3 MCT4	VVHTPETSV******	TKL/RAF	RAF1	NGEVVHTPETpSV	1	T(7): 0.0; T(10): 0.1; S(11): 99.9	121	Forward	Class I
O15439	1	Multidrug resistance-associated protein 4 OS=Homo sapiens GN=ABCC4 PE=1 SV=3 - [MRP4_HUMAN]	O15439	S404	Multidrug resistance-associated protein 4 (ATP-binding cassette sub-family C member 4) (MRP/cMOAT-related ABC transporter) (Multi-specific organic anion transporter B) (MOAT-B)	ABCC4 MRP4	QRNRQLPSDGKKMVH			QLPpSDGKK	1	S(4): 100.0	98	Forward	Class I
O15439	1	Multidrug resistance-associated protein 4 OS=Homo sapiens GN=ABCC4 PE=1 SV=3 - [MRP4_HUMAN]	O15439	T646	Multidrug resistance-associated protein 4 (ATP-binding cassette sub-family C member 4) (MRP/cMOAT-related ABC transporter) (Multi-specific organic anion transporter B) (MOAT-B)	ABCC4 MRP4	EQPPVPGTPTLRNRT	CAMK/MAPKAPK	MAPKAPK3	KDNEESEQPPVPGpTPTLR	1	S(6): 0.0; T(14): 100.0; T(16): 0.0	318	Forward	Class I
O15523	1	ATP-dependent RNA helicase DDX3Y OS=Homo sapiens GN=DDX3Y PE=1 SV=2 - [DDX3Y_HUMAN]	O15523	S592	ATP-dependent RNA helicase DDX3Y (EC 3.6.4.13) (DEAD box protein 3, Y-chromosomal)	DDX3Y DBY	RSKSNRFSGGFGARD	AGC/PKA	PRKY	SNRFpSGGFGAR	1	S(1): 0.0; S(5): 100.0	346	Forward	Class I
O15534	1	Period circadian protein homolog 1 OS=Homo sapiens GN=PER1 PE=1 SV=1 - [PER1_HUMAN]	O15534	S815	Period circadian protein homolog 1 (hPER1) (Circadian clock protein PERIOD 1) (Circadian pacemaker protein Rigui)	PER1 KIAA0482 PER RIGUI	DSSSTAPSALGERGC	CAMK/CAMK1	CaMK4	LRGLDSSSTAPpSALGER	1	S(6): 0.0; S(7): 0.0; S(8): 0.0; T(9): 0.0; S(12): 100.0	402	Forward	Class I
O15541	1	RING finger protein 113A OS=Homo sapiens GN=RNF113A PE=1 SV=1 - [R113A_HUMAN]	O15541	S84	RING finger protein 113A (Zinc finger protein 183)	RNF113A RNF113 ZNF183	KAAYGDLSSEEEEEN			AAYGDLpSpSEEEEENEPESLGVVYK	2	Y(3): 0.0; S(7): 100.0; S(8): 100.0; S(18): 0.0; Y(23): 0.0	315	Forward	Class I
O15541	1	RING finger protein 113A OS=Homo sapiens GN=RNF113A PE=1 SV=1 - [R113A_HUMAN]	O15541	S85	RING finger protein 113A (Zinc finger protein 183)	RNF113A RNF113 ZNF183	AAYGDLSSEEEEENE			AAYGDLpSpSEEEEENEPESLGVVYK	2	Y(3): 0.0; S(7): 100.0; S(8): 100.0; S(18): 0.0; Y(23): 0.0	315	Forward	Class I
O15550	1	Histone demethylase UTX OS=Homo sapiens GN=UTX PE=1 SV=2 - [UTX_HUMAN]	O15550	S818	Lysine-specific demethylase 6A (EC 1.14.11.-) (Histone demethylase UTX) (Ubiquitously-transcribed TPR protein on the X chromosome) (Ubiquitously-transcribed X chromosome tetratricopeptide repeat protein)	KDM6A UTX	TDNSVASSPSSAIST	Other/IKK	IKKa	TDNSVASpSPSSAISTATPpSPK	2	T(1): 0.0; S(4): 0.0; S(7): 0.0; S(8): 100.0; S(10): 0.0; S(11): 0.0; S(14): 0.0; T(15): 0.0; T(17): 0.0; S(19): 100.0	104	Forward	Class I
O15550	1	Histone demethylase UTX OS=Homo sapiens GN=UTX PE=1 SV=2 - [UTX_HUMAN]	O15550	S829	Lysine-specific demethylase 6A (EC 1.14.11.-) (Histone demethylase UTX) (Ubiquitously-transcribed TPR protein on the X chromosome) (Ubiquitously-transcribed X chromosome tetratricopeptide repeat protein)	KDM6A UTX	AISTATPSPKSTEQT	Other/IKK	IKKa	TDNSVASpSPSSAISTATPpSPK	2	T(1): 0.0; S(4): 0.0; S(7): 0.0; S(8): 100.0; S(10): 0.0; S(11): 0.0; S(14): 0.0; T(15): 0.0; T(17): 0.0; S(19): 100.0	104	Forward	Class I
O43149	1	Zinc finger ZZ-type and EF-hand domain-containing protein 1 OS=Homo sapiens GN=ZZEF1 PE=1 SV=5 - [ZZEF1_HUMAN]	O43149	S240	Zinc finger ZZ-type and EF-hand domain-containing protein 1	ZZEF1 KIAA0399	SPGDLTRSPEMDKLK			ESPGDLTRpSPEMDK	1	S(2): 0.0; T(7): 0.0; S(9): 100.0	243	Forward	Class I
O43149	1	Zinc finger ZZ-type and EF-hand domain-containing protein 1 OS=Homo sapiens GN=ZZEF1 PE=1 SV=5 - [ZZEF1_HUMAN]	O43149	S2560	Zinc finger ZZ-type and EF-hand domain-containing protein 1	ZZEF1 KIAA0399	CDQATAESNPVTQKL			CDQATAEpSNPVTQK	1	T(5): 0.0; S(8): 99.9; T(12): 0.0	143	Forward	Class I
O43150	1	Development and differentiation-enhancing factor 2 OS=Homo sapiens GN=DDEF2 PE=1 SV=3 - [DDEF2_HUMAN]	O43150	S701	Arf-GAP with SH3 domain, ANK repeat and PH domain-containing protein 2 (Development and differentiation-enhancing factor 2) (Paxillin-associated protein with ARF GAP activity 3) (PAG3) (Pyk2 C-terminus-associated protein) (PAP)	ASAP2 DDEF2 KIAA0400	LHEDLDESDDDMDEK			LLHEDLDEpSDDDMDEK	1	S(9): 100.0	538	Forward	Class I
O43150	1	Development and differentiation-enhancing factor 2 OS=Homo sapiens GN=DDEF2 PE=1 SV=3 - [DDEF2_HUMAN]	O43150	S822	Arf-GAP with SH3 domain, ANK repeat and PH domain-containing protein 2 (Development and differentiation-enhancing factor 2) (Paxillin-associated protein with ARF GAP activity 3) (PAG3) (Pyk2 C-terminus-associated protein) (PAP)	ASAP2 DDEF2 KIAA0400	GSRQRSSSDPPAVHP			SSpSDPPAVHPPLPPLR	1	S(1): 1.5; S(2): 1.5; S(3): 97.0	132	Forward	Class I
O43159	1	Cerebral protein 1 OS=Homo sapiens GN=KIAA0409 PE=1 SV=2 - [HUCE1_HUMAN]	O43159	S104	Ribosomal RNA-processing protein 8 (EC 2.1.1.-) (Cerebral protein 1) (Nucleomethylin)	RRP8 KIAA0409 NML hucep-1	QKQGPPCSDSEEEVE			QGPPCpSDpSEEEVERK	2	S(6): 100.0; S(8): 100.0	247	Forward	Class I
O43159	1	Cerebral protein 1 OS=Homo sapiens GN=KIAA0409 PE=1 SV=2 - [HUCE1_HUMAN]	O43159	S106	Ribosomal RNA-processing protein 8 (EC 2.1.1.-) (Cerebral protein 1) (Nucleomethylin)	RRP8 KIAA0409 NML hucep-1	QGPPCSDSEEEVERK			QGPPCpSDpSEEEVERK	2	S(6): 100.0; S(8): 100.0	247	Forward	Class I
O43159	1	Cerebral protein 1 OS=Homo sapiens GN=KIAA0409 PE=1 SV=2 - [HUCE1_HUMAN]	O43159	S126	Ribosomal RNA-processing protein 8 (EC 2.1.1.-) (Cerebral protein 1) (Nucleomethylin)	RRP8 KIAA0409 NML hucep-1	QALVGSDSAEDEKRK			QALVGSDpSAEDEK	1	S(6): 4.2; S(8): 95.8	122	Forward	Class I
O43159	1	Cerebral protein 1 OS=Homo sapiens GN=KIAA0409 PE=1 SV=2 - [HUCE1_HUMAN]	O43159	S176	Ribosomal RNA-processing protein 8 (EC 2.1.1.-) (Cerebral protein 1) (Nucleomethylin)	RRP8 KIAA0409 NML hucep-1	KQSPGSTSPKPPHTL			QSPGSTpSPKPPHTLSR	1	S(2): 0.0; S(5): 0.0; T(6): 0.3; S(7): 99.7; T(13): 0.0; S(15): 0.0	252	Forward	Class I
O43159	1	Cerebral protein 1 OS=Homo sapiens GN=KIAA0409 PE=1 SV=2 - [HUCE1_HUMAN]	O43159	S223	Ribosomal RNA-processing protein 8 (EC 2.1.1.-) (Cerebral protein 1) (Nucleomethylin)	RRP8 KIAA0409 NML hucep-1	PTEKTEVSPVPRTDS			TEVpSPVPR	1	T(1): 0.6; S(4): 99.4	40	Forward	Class I
O43164	1	E3 ubiquitin-protein ligase Praja2 OS=Homo sapiens GN=PJA2 PE=1 SV=3 - [PJA2_HUMAN]	O43164	S308	E3 ubiquitin-protein ligase Praja-2 (Praja2) (EC 6.3.2.-) (RING finger protein 131)	PJA2 KIAA0438 RNF131	DREKNHGSSPEQVVR			NHGpSSPEQVVRPK	1	S(4): 99.2; S(5): 0.8	176	Forward	Class I
O43164	1	E3 ubiquitin-protein ligase Praja2 OS=Homo sapiens GN=PJA2 PE=1 SV=3 - [PJA2_HUMAN]	O43164	S309	E3 ubiquitin-protein ligase Praja-2 (Praja2) (EC 6.3.2.-) (RING finger protein 131)	PJA2 KIAA0438 RNF131	REKNHGSSPEQVVRP			NHGSpSPEQVVRPK	1	S(4): 0.0; S(5): 100.0	246	Forward	Class I
O43166	1	Signal-induced proliferation-associated 1-like protein 1 OS=Homo sapiens GN=SIPA1L1 PE=1 SV=4 - [SI1L1_HUMAN]	O43166	S162	Signal-induced proliferation-associated 1-like protein 1 (SIPA1-like protein 1) (High-risk human papilloma viruses E6 oncoproteins targeted protein 1) (E6-targeted protein 1)	SIPA1L1 E6TP1 KIAA0440	MPEAYPSSPRKALRR	CMGC/GSK	GSK3A	FLMPEAYPSpSPRK	1	Y(7): 0.0; S(9): 0.0; S(10): 100.0	166	Forward	Class I
O43166	1	Signal-induced proliferation-associated 1-like protein 1 OS=Homo sapiens GN=SIPA1L1 PE=1 SV=4 - [SI1L1_HUMAN]	O43166	S208	Signal-induced proliferation-associated 1-like protein 1 (SIPA1-like protein 1) (High-risk human papilloma viruses E6 oncoproteins targeted protein 1) (E6-targeted protein 1)	SIPA1L1 E6TP1 KIAA0440	SLHREYGSTSSIDKQ	CK1	CK1d, CK1e	TGPSLHREYGpSTSSIDK	1	T(1): 0.0; S(4): 0.0; Y(9): 0.0; S(11): 100.0; T(12): 0.0; S(13): 0.0; S(14): 0.0	275	Forward	Class I
O43166	1	Signal-induced proliferation-associated 1-like protein 1 OS=Homo sapiens GN=SIPA1L1 PE=1 SV=4 - [SI1L1_HUMAN]	O43166	S288	Signal-induced proliferation-associated 1-like protein 1 (SIPA1-like protein 1) (High-risk human papilloma viruses E6 oncoproteins targeted protein 1) (E6-targeted protein 1)	SIPA1L1 E6TP1 KIAA0440	PLKRRSKSETGDSSI			SKpSETGDSSIFRK	1	S(1): 0.0; S(3): 100.0; T(5): 0.0; S(8): 0.0; S(9): 0.0	276	Forward	Class I
O43166	1	Signal-induced proliferation-associated 1-like protein 1 OS=Homo sapiens GN=SIPA1L1 PE=1 SV=4 - [SI1L1_HUMAN]	O43166	S1181	Signal-induced proliferation-associated 1-like protein 1 (SIPA1-like protein 1) (High-risk human papilloma viruses E6 oncoproteins targeted protein 1) (E6-targeted protein 1)	SIPA1L1 E6TP1 KIAA0440	GFGVSRRSPASIDRQ			SMPEGFGVSRRpSPASIDR	1	S(1): 0.0; S(9): 0.0; S(12): 100.0; S(15): 0.0	270	Forward	Class I
O43166	1	Signal-induced proliferation-associated 1-like protein 1 OS=Homo sapiens GN=SIPA1L1 PE=1 SV=4 - [SI1L1_HUMAN]	O43166	S1255	Signal-induced proliferation-associated 1-like protein 1 (SIPA1-like protein 1) (High-risk human papilloma viruses E6 oncoproteins targeted protein 1) (E6-targeted protein 1)	SIPA1L1 E6TP1 KIAA0440	VLPAFRESPSGRLMR			VLPAFREpSPSGR	1	S(8): 100.0; S(10): 0.0	132	Forward	Class I
O43166	1	Signal-induced proliferation-associated 1-like protein 1 OS=Homo sapiens GN=SIPA1L1 PE=1 SV=4 - [SI1L1_HUMAN]	O43166	S1433	Signal-induced proliferation-associated 1-like protein 1 (SIPA1-like protein 1) (High-risk human papilloma viruses E6 oncoproteins targeted protein 1) (E6-targeted protein 1)	SIPA1L1 E6TP1 KIAA0440	MSSRHSASPVVFTSA	CMGC/GSK	GSK3A	HSApSPVVFTSAR	1	S(2): 0.0; S(4): 100.0; T(9): 0.0; S(10): 0.0	142	Forward	Class I
O43166	1	Signal-induced proliferation-associated 1-like protein 1 OS=Homo sapiens GN=SIPA1L1 PE=1 SV=4 - [SI1L1_HUMAN]	O43166	S1528	Signal-induced proliferation-associated 1-like protein 1 (SIPA1-like protein 1) (High-risk human papilloma viruses E6 oncoproteins targeted protein 1) (E6-targeted protein 1)	SIPA1L1 E6TP1 KIAA0440	STRDLRASPKPTSKS	CMGC/GSK	GSK3A	DLRApSPKPTSK	1	S(5): 100.0; T(9): 0.0; S(10): 0.0	195	Forward	Class I
O43166	1	Signal-induced proliferation-associated 1-like protein 1 OS=Homo sapiens GN=SIPA1L1 PE=1 SV=4 - [SI1L1_HUMAN]	O43166	S1549	Signal-induced proliferation-associated 1-like protein 1 (SIPA1-like protein 1) (High-risk human papilloma viruses E6 oncoproteins targeted protein 1) (E6-targeted protein 1)	SIPA1L1 E6TP1 KIAA0440	KKLIDLESPTPESQK	CMGC/GSK	GSK3A	KLIDLEpSPTPESQK	1	S(7): 100.0; T(9): 0.0; S(12): 0.0	407	Forward	Class I
O43166	1	Signal-induced proliferation-associated 1-like protein 1 OS=Homo sapiens GN=SIPA1L1 PE=1 SV=4 - [SI1L1_HUMAN]	O43166	S1565	Signal-induced proliferation-associated 1-like protein 1 (SIPA1-like protein 1) (High-risk human papilloma viruses E6 oncoproteins targeted protein 1) (E6-targeted protein 1)	SIPA1L1 E6TP1 KIAA0440	FKFHALSSPQSPFPS	CMGC/GSK	GSK3A	FHALSpSPQSPFPSTPTSR	1	S(5): 7.0; S(6): 86.1; S(9): 7.0; S(13): 0.0; T(14): 0.0; T(16): 0.0; S(17): 0.0	102	Forward	Class I
O43166	1	Signal-induced proliferation-associated 1-like protein 1 OS=Homo sapiens GN=SIPA1L1 PE=1 SV=4 - [SI1L1_HUMAN]	O43166	S1568	Signal-induced proliferation-associated 1-like protein 1 (SIPA1-like protein 1) (High-risk human papilloma viruses E6 oncoproteins targeted protein 1) (E6-targeted protein 1)	SIPA1L1 E6TP1 KIAA0440	HALSSPQSPFPSTPT	CMGC/GSK	GSK3A	FHALSSPQpSPFPSTPTSR	1	S(5): 0.0; S(6): 0.0; S(9): 100.0; S(13): 0.0; T(14): 0.0; T(16): 0.0; S(17): 0.0	224	Forward	Class I
O43166	1	Signal-induced proliferation-associated 1-like protein 1 OS=Homo sapiens GN=SIPA1L1 PE=1 SV=4 - [SI1L1_HUMAN]	O43166	S1585	Signal-induced proliferation-associated 1-like protein 1 (SIPA1-like protein 1) (High-risk human papilloma viruses E6 oncoproteins targeted protein 1) (E6-targeted protein 1)	SIPA1L1 E6TP1 KIAA0440	RALHRTLSDESIYNS	CK1	CK1d, CK1e	TLpSDESIYNSQR	1	T(1): 0.0; S(3): 100.0; S(6): 0.0; Y(8): 0.0; S(10): 0.0	328	Forward	Class I
O43166	1	Signal-induced proliferation-associated 1-like protein 1 OS=Homo sapiens GN=SIPA1L1 PE=1 SV=4 - [SI1L1_HUMAN]	O43166	S1588	Signal-induced proliferation-associated 1-like protein 1 (SIPA1-like protein 1) (High-risk human papilloma viruses E6 oncoproteins targeted protein 1) (E6-targeted protein 1)	SIPA1L1 E6TP1 KIAA0440	HRTLSDESIYNSQRE	CK1	CK1d, CK1e	TLpSDEpSIYNSQR	2	T(1): 0.9; S(3): 99.5; S(6): 99.5; Y(8): 0.0; S(10): 0.0	113	Forward	Class I
O43166	1	Signal-induced proliferation-associated 1-like protein 1 OS=Homo sapiens GN=SIPA1L1 PE=1 SV=4 - [SI1L1_HUMAN]	O43166	S1632	Signal-induced proliferation-associated 1-like protein 1 (SIPA1-like protein 1) (High-risk human papilloma viruses E6 oncoproteins targeted protein 1) (E6-targeted protein 1)	SIPA1L1 E6TP1 KIAA0440	SLPLRRPSYTLGMKS			SLPLRRPpSYTLGMK	1	S(1): 0.0; S(8): 100.0; Y(9): 0.0; T(10): 0.0	201	Forward	Class I
O43173	1	Sia-alpha-2,3-Gal-beta-1,4-GlcNAc-R:alpha 2,8-sialyltransferase OS=Homo sapiens GN=ST8SIA3 PE=2 SV=3 - [SIA8C_HUMAN]	O43173	T40	Sia-alpha-2,3-Gal-beta-1,4-GlcNAc-R:alpha 2,8-sialyltransferase (EC 2.4.99.-) (Alpha-2,8-sialyltransferase 8C) (Alpha-2,8-sialyltransferase III) (ST8 alpha-N-acetyl-neuraminide alpha-2,8-sialyltransferase 3) (Sialyltransferase 8C) (SIAT8-C) (Sialytransferase St8Sia III) (ST8SiaIII)	ST8SIA3 SIAT8C	LKKENIFTTPKYASP			ENIFpTTPK	1	T(5): 100.0; T(6): 0.0	119	Forward	Class I
O43189	1	PHD finger protein 1 OS=Homo sapiens GN=PHF1 PE=1 SV=2 - [PHF1_HUMAN]	O43189	S20	PHD finger protein 1 (Protein PHF1) (Polycomb-like protein 1) (hPCl1)	PHF1 PCL1	SSLWDPASPAPTSGP			SGASSLWDPApSPAPTSGPRPR	1	S(1): 0.0; S(4): 0.0; S(5): 0.0; S(11): 100.0; T(15): 0.0; S(16): 0.0	128	Forward	Class I
O43237	1	Cytoplasmic dynein 1 light intermediate chain 2 OS=Homo sapiens GN=DYNC1LI2 PE=1 SV=1 - [DC1L2_HUMAN]	O43237	S194	Cytoplasmic dynein 1 light intermediate chain 2 (Dynein light intermediate chain 2, cytosolic) (LIC-2) (LIC53/55)	DYNC1LI2 DNCLI2 LIC2	PEEGCQGSPQRRGPL			DFQDYMEPEEGCQGpSPQR	1	Y(5): 0.0; S(15): 100.0	260	Forward	Class I
O43237	1	Cytoplasmic dynein 1 light intermediate chain 2 OS=Homo sapiens GN=DYNC1LI2 PE=1 SV=1 - [DC1L2_HUMAN]	O43237	S383	Cytoplasmic dynein 1 light intermediate chain 2 (Dynein light intermediate chain 2, cytosolic) (LIC-2) (LIC53/55)	DYNC1LI2 DNCLI2 LIC2	TPTRASESPARGPSG			ASEpSPARGPSGSPR	1	S(2): 0.0; S(4): 100.0; S(10): 0.0; S(12): 0.0	222	Forward	Class I
O43237	1	Cytoplasmic dynein 1 light intermediate chain 2 OS=Homo sapiens GN=DYNC1LI2 PE=1 SV=1 - [DC1L2_HUMAN]	O43237	S391	Cytoplasmic dynein 1 light intermediate chain 2 (Dynein light intermediate chain 2, cytosolic) (LIC-2) (LIC53/55)	DYNC1LI2 DNCLI2 LIC2	PARGPSGSPRTQGRG			ASESPARGPSGpSPR	1	S(2): 0.0; S(4): 0.0; S(10): 0.0; S(12): 100.0	224	Forward	Class I
O43237	1	Cytoplasmic dynein 1 light intermediate chain 2 OS=Homo sapiens GN=DYNC1LI2 PE=1 SV=1 - [DC1L2_HUMAN]	O43237	T410	Cytoplasmic dynein 1 light intermediate chain 2 (Dynein light intermediate chain 2, cytosolic) (LIC-2) (LIC53/55)	DYNC1LI2 DNCLI2 LIC2	VPSSSPGTSVKKPDP			GGPASVPSSSPGpTSVK	1	S(5): 0.0; S(8): 0.3; S(9): 4.7; S(10): 4.7; T(13): 85.5; S(14): 4.7	117	Forward	Class I
O43237	1	Cytoplasmic dynein 1 light intermediate chain 2 OS=Homo sapiens GN=DYNC1LI2 PE=1 SV=1 - [DC1L2_HUMAN]	O43237	S446	Cytoplasmic dynein 1 light intermediate chain 2 (Dynein light intermediate chain 2, cytosolic) (LIC-2) (LIC53/55)	DYNC1LI2 DNCLI2 LIC2	KKTGSPGSPGAGGVQ			KTGSPGpSPGAGGVQSTAK	1	T(2): 0.0; S(4): 0.0; S(7): 100.0; S(15): 0.0; T(16): 0.0	356	Forward	Class I
O43237	1	Cytoplasmic dynein 1 light intermediate chain 2 OS=Homo sapiens GN=DYNC1LI2 PE=1 SV=1 - [DC1L2_HUMAN]	O43237	S486	Cytoplasmic dynein 1 light intermediate chain 2 (Dynein light intermediate chain 2, cytosolic) (LIC-2) (LIC53/55)	DYNC1LI2 DNCLI2 LIC2	PDSMVTNSSTENEA*			KPDSMVTNpSSTENEA	1	S(4): 0.0; T(7): 0.0; S(9): 98.6; S(10): 1.3; T(11): 0.2	114	Forward	Class I
O43242	1	26S proteasome non-ATPase regulatory subunit 3 OS=Homo sapiens GN=PSMD3 PE=1 SV=2 - [PSMD3_HUMAN]	O43242	T308	26S proteasome non-ATPase regulatory subunit 3 (26S proteasome regulatory subunit RPN3) (26S proteasome regulatory subunit S3) (Proteasome subunit p58)	PSMD3	EYSEARRTMTNALRK			RpTMTNALR	1	T(2): 97.3; T(4): 2.7	79	Forward	Class I
O43242	1	26S proteasome non-ATPase regulatory subunit 3 OS=Homo sapiens GN=PSMD3 PE=1 SV=2 - [PSMD3_HUMAN]	O43242	T320	26S proteasome non-ATPase regulatory subunit 3 (26S proteasome regulatory subunit RPN3) (26S proteasome regulatory subunit S3) (Proteasome subunit p58)	PSMD3	LRKAPQHTAVGFKQT			APQHpTAVGFK	1	T(5): 100.0	61	Forward	Class I
O43290	1	U4/U6.U5 tri-snRNP-associated protein 1 OS=Homo sapiens GN=SART1 PE=1 SV=1 - [SNUT1_HUMAN]	O43290	S448	U4/U6.U5 tri-snRNP-associated protein 1 (SNU66 homolog) (hSnu66) (Squamous cell carcinoma antigen recognized by T-cells 1) (SART-1) (hSART-1) (U4/U6.U5 tri-snRNP-associated 110 kDa protein) (allergen Hom s 1)	SART1	GRGRRRVSEVEEEKE	AGC/DMPK	ROCK1	RVpSEVEEEKEPVPQPLPSDDTR	1	S(3): 100.0; S(18): 0.0; T(21): 0.0	171	Forward	Class I
O43290	1	U4/U6.U5 tri-snRNP-associated protein 1 OS=Homo sapiens GN=SART1 PE=1 SV=1 - [SNUT1_HUMAN]	O43290	S598	U4/U6.U5 tri-snRNP-associated protein 1 (SNU66 homolog) (hSnu66) (Squamous cell carcinoma antigen recognized by T-cells 1) (SART-1) (hSART-1) (U4/U6.U5 tri-snRNP-associated 110 kDa protein) (allergen Hom s 1)	SART1	SANGGSESDGEENIG			SANGGSEpSDGEENIGWSTVNLDEEK	1	S(1): 0.0; S(6): 0.0; S(8): 100.0; S(17): 0.0; T(18): 0.0	385	Forward	Class I
O43293	1	Death-associated protein kinase 3 OS=Homo sapiens GN=DAPK3 PE=1 SV=1 - [DAPK3_HUMAN]	O43293	S312	Death-associated protein kinase 3 (DAP kinase 3) (EC 2.7.11.1) (DAP-like kinase) (Dlk) (MYPT1 kinase) (Zipper-interacting protein kinase) (ZIP-kinase)	DAPK3 ZIPK	YTIKSHSSLPPNNSY			SHSpSLPPNNSYADFER	1	S(1): 0.0; S(3): 3.7; S(4): 96.3; S(10): 0.0; Y(11): 0.0	309	Forward	Class I
O43294	1	Transforming growth factor beta-1-induced transcript 1 protein OS=Homo sapiens GN=TGFB1I1 PE=1 SV=2 - [TGFI1_HUMAN]	O43294	S137	Transforming growth factor beta-1-induced transcript 1 protein (Androgen receptor coactivator 55 kDa protein) (Androgen receptor-associated protein of 55 kDa) (Hydrogen peroxide-inducible clone 5 protein) (Hic-5)	TGFB1I1 ARA55	SEDKKRPSLPSSPSP	CMGC/MAPK	Erk2, Erk7	KRPpSLPSSPSPGLPK	1	S(4): 100.0; S(7): 0.0; S(8): 0.0; S(10): 0.0	221	Forward	Class I
O43294	1	Transforming growth factor beta-1-induced transcript 1 protein OS=Homo sapiens GN=TGFB1I1 PE=1 SV=2 - [TGFI1_HUMAN]	O43294	S141	Transforming growth factor beta-1-induced transcript 1 protein (Androgen receptor coactivator 55 kDa protein) (Androgen receptor-associated protein of 55 kDa) (Hydrogen peroxide-inducible clone 5 protein) (Hic-5)	TGFB1I1 ARA55	KRPSLPSSPSPGLPK	CMGC/DYRK	HIPK3	KRPpSLPSpSPSPGLPK	2	S(4): 100.0; S(7): 5.7; S(8): 94.3; S(10): 0.0	212	Forward	Class I
O43294	1	Transforming growth factor beta-1-induced transcript 1 protein OS=Homo sapiens GN=TGFB1I1 PE=1 SV=2 - [TGFI1_HUMAN]	O43294	S143	Transforming growth factor beta-1-induced transcript 1 protein (Androgen receptor coactivator 55 kDa protein) (Androgen receptor-associated protein of 55 kDa) (Hydrogen peroxide-inducible clone 5 protein) (Hic-5)	TGFB1I1 ARA55	PSLPSSPSPGLPKAS	CMGC/DYRK	HIPK3	KRPSLPSSPpSPGLPK	1	S(4): 0.0; S(7): 0.0; S(8): 0.0; S(10): 100.0	191	Forward	Class I
O43294	1	Transforming growth factor beta-1-induced transcript 1 protein OS=Homo sapiens GN=TGFB1I1 PE=1 SV=2 - [TGFI1_HUMAN]	O43294	S164	Transforming growth factor beta-1-induced transcript 1 protein (Androgen receptor coactivator 55 kDa protein) (Androgen receptor-associated protein of 55 kDa) (Hydrogen peroxide-inducible clone 5 protein) (Hic-5)	TGFB1I1 ARA55	ELDRLMASLSDFRVQ			LMApSLSDFR	1	S(4): 100.0; S(6): 0.0	99	Forward	Class I
O43303	1	Centrosomal protein of 110 kDa OS=Homo sapiens GN=CEP110 PE=1 SV=3 - [CE110_HUMAN]	O43303	S372	Centriolar coiled-coil protein of 110 kDa (Centrosomal protein of 110 kDa) (CP110) (Cep110)	CCP110 CEP110 CP110 KIAA0419	PSPEPSMSPKMHRRR	CMGC/CDK/CDC2	CDC2, CDK2	LPSPEPSMpSPK	1	S(3): 0.0; S(7): 1.2; S(9): 98.8	80	Forward	Class I
O43306	1	Adenylate cyclase type 6 OS=Homo sapiens GN=ADCY6 PE=1 SV=2 - [ADCY6_HUMAN]	O43306	S54	Adenylate cyclase type 6 (EC 4.6.1.1) (ATP pyrophosphate-lyase 6) (Adenylate cyclase type VI) (Adenylyl cyclase 6) (Ca(2+)-inhibitable adenylyl cyclase)	ADCY6 KIAA0422	LRDAEPPSPTPAGPP			DAEPPpSPTPAGPPR	1	S(6): 99.4; T(8): 0.6	78	Forward	Class I
O43310	1	Uncharacterized protein KIAA0427 OS=Homo sapiens GN=KIAA0427 PE=1 SV=1 - [K0427_HUMAN]	O43310	S328	CBP80/20-dependent translation initiation factor	CTIF KIAA0427	VETKRKDSILPERIG			RKDpSILPER	1	S(4): 100.0	123	Forward	Class I
O43312	1	Metastasis suppressor protein 1 OS=Homo sapiens GN=MTSS1 PE=1 SV=2 - [MTSS1_HUMAN]	O43312	S594	Metastasis suppressor protein 1 (Metastasis suppressor YGL-1) (Missing in metastasis protein)	MTSS1 KIAA0429 MIM	ATIRRTPSTKPSVRR			RTPpSTKPSVR	1	T(2): 0.0; S(4): 99.7; T(5): 0.3; S(8): 0.0	155	Forward	Class I
O43314	1	Inositol hexakisphosphate and diphosphoinositol-pentakisphosphate kinase 2 OS=Homo sapiens GN=HISPPD1 PE=1 SV=3 - [VIP2_HUMAN]	O43314	S1006	Inositol hexakisphosphate and diphosphoinositol-pentakisphosphate kinase 2 (EC 2.7.4.21) (EC 2.7.4.24) (Diphosphoinositol pentakisphosphate kinase 2) (Histidine acid phosphatase domain-containing protein 1) (InsP6 and PP-IP5 kinase 2) (VIP1 homolog 2) (hsVIP2)	PPIP5K2 HISPPD1 KIAA0433 VIP2	TGRRRRRSGEQITSS			pSGEQITSSPVSPK	1	S(1): 100.0; T(6): 0.0; S(7): 0.0; S(8): 0.0; S(11): 0.0	170	Forward	Class I
O43314	1	Inositol hexakisphosphate and diphosphoinositol-pentakisphosphate kinase 2 OS=Homo sapiens GN=HISPPD1 PE=1 SV=3 - [VIP2_HUMAN]	O43314	S1108	Inositol hexakisphosphate and diphosphoinositol-pentakisphosphate kinase 2 (EC 2.7.4.21) (EC 2.7.4.24) (Diphosphoinositol pentakisphosphate kinase 2) (Histidine acid phosphatase domain-containing protein 1) (InsP6 and PP-IP5 kinase 2) (VIP1 homolog 2) (hsVIP2)	PPIP5K2 HISPPD1 KIAA0433 VIP2	GSAVKRFSISFARHP			RFpSISFAR	1	S(3): 99.0; S(5): 1.0	20	Forward	Class I
O43314	1	Inositol hexakisphosphate and diphosphoinositol-pentakisphosphate kinase 2 OS=Homo sapiens GN=HISPPD1 PE=1 SV=3 - [VIP2_HUMAN]	O43314	S1172	Inositol hexakisphosphate and diphosphoinositol-pentakisphosphate kinase 2 (EC 2.7.4.21) (EC 2.7.4.24) (Diphosphoinositol pentakisphosphate kinase 2) (Histidine acid phosphatase domain-containing protein 1) (InsP6 and PP-IP5 kinase 2) (VIP1 homolog 2) (hsVIP2)	PPIP5K2 HISPPD1 KIAA0433 VIP2	SSTALRSSPIMRKKV			TAEISSTALRSpSPIMR	1	T(1): 0.0; S(5): 0.0; S(6): 0.0; T(7): 0.0; S(11): 0.0; S(12): 100.0	354	Forward	Class I
O43318	1	Mitogen-activated protein kinase kinase kinase 7 OS=Homo sapiens GN=MAP3K7 PE=1 SV=1 - [M3K7_HUMAN]	O43318	S389	Mitogen-activated protein kinase kinase kinase 7 (EC 2.7.11.25) (Transforming growth factor-beta-activated kinase 1) (TGF-beta-activated kinase 1)	MAP3K7 TAK1	TSEGKRMSADMSEIE	STE/STE-Unique/NIK	NIK	RMpSADMSEIEAR	1	S(3): 100.0; S(7): 0.0	258	Forward	Class I
O43318	1	Mitogen-activated protein kinase kinase kinase 7 OS=Homo sapiens GN=MAP3K7 PE=1 SV=1 - [M3K7_HUMAN]	O43318	S439	Mitogen-activated protein kinase kinase kinase 7 (EC 2.7.11.25) (Transforming growth factor-beta-activated kinase 1) (TGF-beta-activated kinase 1)	MAP3K7 TAK1	NGQPRRRSIQDLTVT	TKL/IRAK	IRAK1, IRAK2	pSIQDLTVTGTEPGQVSSR	1	S(1): 100.0; T(6): 0.0; T(8): 0.0; T(10): 0.0; S(16): 0.0; S(17): 0.0	313	Forward	Class I
O43318	1	Mitogen-activated protein kinase kinase kinase 7 OS=Homo sapiens GN=MAP3K7 PE=1 SV=1 - [M3K7_HUMAN]	O43318	S455	Mitogen-activated protein kinase kinase kinase 7 (EC 2.7.11.25) (Transforming growth factor-beta-activated kinase 1) (TGF-beta-activated kinase 1)	MAP3K7 TAK1	TEPGQVSSRSSSPSV	STE/STE-Unique/NIK	NIK	pSIQDLTVTGTEPGQVSpSR	2	S(1): 100.0; T(6): 0.0; T(8): 0.0; T(10): 0.0; S(16): 1.1; S(17): 98.9	177	Forward	Class I
O43353	1	Receptor-interacting serine/threonine-protein kinase 2 OS=Homo sapiens GN=RIPK2 PE=1 SV=2 - [RIPK2_HUMAN]	O43353	S531	Receptor-interacting serine/threonine-protein kinase 2 (EC 2.7.11.1) (CARD-containing interleukin-1 beta-converting enzyme-associated kinase) (CARD-containing IL-1 beta ICE-kinase) (RIP-like-interacting CLARP kinase) (Receptor-interacting protein 2) (RIP-2) (Tyrosine-protein kinase RIPK2) (EC 2.7.10.2)	RIPK2 CARDIAK RICK RIP2 UNQ277/PRO314/PRO34092	LVVSRSPSLNLLQNK			SPpSLNLLQNK	1	S(1): 0.2; S(3): 99.8	102	Forward	Class I
O43379	1	WD repeat-containing protein 62 OS=Homo sapiens GN=WDR62 PE=1 SV=2 - [WDR62_HUMAN]	O43379	S33	WD repeat-containing protein 62	WDR62 C19orf14	PARRGQSSPPPAPPI	CMGC/MAPK	JNK2	RGQSpSPPPAPPICLR	1	S(4): 0.0; S(5): 100.0	176	Forward	Class I
O43379	1	WD repeat-containing protein 62 OS=Homo sapiens GN=WDR62 PE=1 SV=2 - [WDR62_HUMAN]	O43379	S1144	WD repeat-containing protein 62	WDR62 C19orf14	RAGTGYASPDRTHVL	CMGC/MAPK	JNK2	AGTGYApSPDRTHVLAAGK	1	T(3): 0.0; Y(5): 0.0; S(7): 100.0; T(11): 0.0	160	Forward	Class I
O43379	1	WD repeat-containing protein 62 OS=Homo sapiens GN=WDR62 PE=1 SV=2 - [WDR62_HUMAN]	O43379	S1228	WD repeat-containing protein 62	WDR62 C19orf14	ARISRSISLGDSEGP	CAMK/DAPK	DAPK3	SIpSLGDSEGPIVATLAQPLR	1	S(1): 0.0; S(3): 100.0; S(7): 0.0; T(14): 0.0	201	Forward	Class I
O43390;O60506	2	Heterogeneous nuclear ribonucleoprotein R OS=Homo sapiens GN=HNRNPR PE=1 SV=1 - [HNRPR_HUMAN]|Heterogeneous nuclear ribonucleoprotein Q OS=Homo sapiens GN=SYNCRIP PE=1 SV=2 - [HNRPQ_HUMAN]	O43390	S252	Heterogeneous nuclear ribonucleoprotein R (hnRNP R)	HNRNPR HNRPR	NNRLFVGSIPKNKTK			LFVGpSIPK	1	S(5): 100.0	79	Forward	Class I	O60506	S249	Heterogeneous nuclear ribonucleoprotein Q (hnRNP Q) (Glycine- and tyrosine-rich RNA-binding protein) (GRY-RBP) (NS1-associated protein 1) (Synaptotagmin-binding, cytoplasmic RNA-interacting protein)	SYNCRIP HNRPQ NSAP1
O43395	1	U4/U6 small nuclear ribonucleoprotein Prp3 OS=Homo sapiens GN=PRPF3 PE=1 SV=2 - [PRPF3_HUMAN]	O43395	T251	U4/U6 small nuclear ribonucleoprotein Prp3 (Pre-mRNA-splicing factor 3) (hPrp3) (U4/U6 snRNP 90 kDa protein)	PRPF3 HPRP3 PRP3	KVELKDQTKPTPLIL			DQpTKPpTPLILDEQGR	2	T(3): 100.0; T(6): 100.0	128	Forward	Class I
O43395	1	U4/U6 small nuclear ribonucleoprotein Prp3 OS=Homo sapiens GN=PRPF3 PE=1 SV=2 - [PRPF3_HUMAN]	O43395	T254	U4/U6 small nuclear ribonucleoprotein Prp3 (Pre-mRNA-splicing factor 3) (hPrp3) (U4/U6 snRNP 90 kDa protein)	PRPF3 HPRP3 PRP3	LKDQTKPTPLILDEQ			DQpTKPpTPLILDEQGR	2	T(3): 100.0; T(6): 100.0	128	Forward	Class I
O43395	1	U4/U6 small nuclear ribonucleoprotein Prp3 OS=Homo sapiens GN=PRPF3 PE=1 SV=2 - [PRPF3_HUMAN]	O43395	S619	U4/U6 small nuclear ribonucleoprotein Prp3 (Pre-mRNA-splicing factor 3) (hPrp3) (U4/U6 snRNP 90 kDa protein)	PRPF3 HPRP3 PRP3	KGDDDEESDEEAVKK	Other/CK2	CK2a2	WDEQTSNTKGDDDEEpSDEEAVKK	1	T(5): 0.0; S(6): 0.0; T(8): 0.0; S(16): 100.0	256	Forward	Class I
O43396	1	Thioredoxin-like protein 1 OS=Homo sapiens GN=TXNL1 PE=1 SV=3 - [TXNL1_HUMAN]	O43396	S113	Thioredoxin-like protein 1 (32 kDa thioredoxin-related protein)	TXNL1 TRP32 TXL TXNL	HLENDPGSNEDTDIP			QHLENDPGpSNEDTDIPK	1	S(9): 100.0; T(13): 0.0	328	Forward	Class I
O43399	1	Tumor protein D54 OS=Homo sapiens GN=TPD52L2 PE=1 SV=2 - [TPD54_HUMAN]	O43399	S21	Tumor protein D54 (hD54) (Tumor protein D52-like 2)	TPD52L2	NKGLLSDSMTDVPVD			GLLSDpSMTDVPVDTGVAAR	1	S(4): 0.0; S(6): 100.0; T(8): 0.0; T(14): 0.0	357	Forward	Class I
O43399	1	Tumor protein D54 OS=Homo sapiens GN=TPD52L2 PE=1 SV=2 - [TPD54_HUMAN]	O43399	S166	Tumor protein D54 (hD54) (Tumor protein D52-like 2)	TPD52L2	RNSATFKSFEDRVGT			NSATFKpSFEDR	1	S(2): 0.0; T(4): 0.0; S(7): 100.0	354	Forward	Class I
O43426	1	Synaptojanin-1 OS=Homo sapiens GN=SYNJ1 PE=1 SV=1 - [SYNJ1_HUMAN]	O43426	T1220	Synaptojanin-1 (EC 3.1.3.36) (Synaptic inositol 1,4,5-trisphosphate 5-phosphatase 1)	SYNJ1 KIAA0910	RASAGRLTPESQSKT	CMGC/DYRK	DYRK1A	ASAGRLpTPESQSK	1	S(2): 0.0; T(7): 100.0; S(10): 0.0; S(12): 0.0	341	Forward	Class I
O43426	1	Synaptojanin-1 OS=Homo sapiens GN=SYNJ1 PE=1 SV=1 - [SYNJ1_HUMAN]	O43426	S1345	Synaptojanin-1 (EC 3.1.3.36) (Synaptic inositol 1,4,5-trisphosphate 5-phosphatase 1)	SYNJ1 KIAA0910	AQLSVQTSPVPTPDP	CMGC/DYRK	DYRK1A	AQLSVQTpSPVPTPDPK	1	S(4): 0.0; T(7): 0.1; S(8): 99.9; T(12): 0.0	203	Forward	Class I
O43426	1	Synaptojanin-1 OS=Homo sapiens GN=SYNJ1 PE=1 SV=1 - [SYNJ1_HUMAN]	O43426	S1393	Synaptojanin-1 (EC 3.1.3.36) (Synaptic inositol 1,4,5-trisphosphate 5-phosphatase 1)	SYNJ1 KIAA0910	QSQENMRSSPNPFIT			pSSPNPFITGLTR	1	S(1): 99.4; S(2): 0.6; T(8): 0.0; T(11): 0.0	176	Forward	Class I
O43426	1	Synaptojanin-1 OS=Homo sapiens GN=SYNJ1 PE=1 SV=1 - [SYNJ1_HUMAN]	O43426	S1394	Synaptojanin-1 (EC 3.1.3.36) (Synaptic inositol 1,4,5-trisphosphate 5-phosphatase 1)	SYNJ1 KIAA0910	SQENMRSSPNPFITG			SpSPNPFITGLTR	1	S(1): 0.2; S(2): 99.8; T(8): 0.0; T(11): 0.0	213	Forward	Class I
O43426	1	Synaptojanin-1 OS=Homo sapiens GN=SYNJ1 PE=1 SV=1 - [SYNJ1_HUMAN]	O43426	S1567	Synaptojanin-1 (EC 3.1.3.36) (Synaptic inositol 1,4,5-trisphosphate 5-phosphatase 1)	SYNJ1 KIAA0910	TTLASKASPTLDFTE	CMGC/DYRK	DYRK1A	ApSPTLDFTER	1	S(2): 100.0; T(4): 0.0; T(8): 0.0	144	Forward	Class I
O43432	1	Eukaryotic translation initiation factor 4 gamma 3 OS=Homo sapiens GN=EIF4G3 PE=1 SV=2 - [IF4G3_HUMAN]	O43432	S232	Eukaryotic translation initiation factor 4 gamma 3 (eIF-4-gamma 3) (eIF-4G 3) (eIF4G 3) (eIF-4-gamma II) (eIF4GII)	EIF4G3	DPVLKSPSPVLRLVL			SPpSPVLR	1	S(1): 0.2; S(3): 99.8	77	Forward	Class I
O43432	1	Eukaryotic translation initiation factor 4 gamma 3 OS=Homo sapiens GN=EIF4G3 PE=1 SV=2 - [IF4G3_HUMAN]	O43432	S495	Eukaryotic translation initiation factor 4 gamma 3 (eIF-4-gamma 3) (eIF-4G 3) (eIF4G 3) (eIF-4-gamma II) (eIF4GII)	EIF4G3	QNLNSRRSPVPAQIA	Atypical/PIKK/FRAP	FRAP	pSPVPAQIAITVPK	1	S(1): 100.0; T(10): 0.0	262	Forward	Class I
O43432	1	Eukaryotic translation initiation factor 4 gamma 3 OS=Homo sapiens GN=EIF4G3 PE=1 SV=2 - [IF4G3_HUMAN]	O43432	S1156	Eukaryotic translation initiation factor 4 gamma 3 (eIF-4-gamma 3) (eIF-4G 3) (eIF4G 3) (eIF-4-gamma II) (eIF4GII)	EIF4G3	NTFMRGGSSKDLLDN	CAMK/CAMK1	CaMK1a	GGpSSKDLLDNQSQEEQRR	1	S(3): 92.2; S(4): 7.8; S(12): 0.0	138	Forward	Class I
O43432	1	Eukaryotic translation initiation factor 4 gamma 3 OS=Homo sapiens GN=EIF4G3 PE=1 SV=2 - [IF4G3_HUMAN]	O43432	S1157	Eukaryotic translation initiation factor 4 gamma 3 (eIF-4-gamma 3) (eIF-4G 3) (eIF4G 3) (eIF-4-gamma II) (eIF4GII)	EIF4G3	TFMRGGSSKDLLDNQ			GGSpSKDLLDNQSQEEQRR	1	S(3): 10.4; S(4): 89.6; S(12): 0.0	115	Forward	Class I
O43432	1	Eukaryotic translation initiation factor 4 gamma 3 OS=Homo sapiens GN=EIF4G3 PE=1 SV=2 - [IF4G3_HUMAN]	O43432	S1165	Eukaryotic translation initiation factor 4 gamma 3 (eIF-4-gamma 3) (eIF-4G 3) (eIF4G 3) (eIF-4-gamma II) (eIF4GII)	EIF4G3	KDLLDNQSQEEQRRE			GGSSKDLLDNQpSQEEQRR	1	S(3): 0.0; S(4): 0.0; S(12): 100.0	176	Forward	Class I
O43432	1	Eukaryotic translation initiation factor 4 gamma 3 OS=Homo sapiens GN=EIF4G3 PE=1 SV=2 - [IF4G3_HUMAN]	O43432	S1409	Eukaryotic translation initiation factor 4 gamma 3 (eIF-4-gamma 3) (eIF-4G 3) (eIF4G 3) (eIF-4-gamma II) (eIF4GII)	EIF4G3	LDFIESDSPCSSEAL			LDFIESDpSPCSSEALSK	1	S(6): 0.0; S(8): 100.0; S(11): 0.0; S(12): 0.0; S(16): 0.0	294	Forward	Class I
O43432	1	Eukaryotic translation initiation factor 4 gamma 3 OS=Homo sapiens GN=EIF4G3 PE=1 SV=2 - [IF4G3_HUMAN]	O43432	S1412	Eukaryotic translation initiation factor 4 gamma 3 (eIF-4-gamma 3) (eIF-4G 3) (eIF4G 3) (eIF-4-gamma II) (eIF4GII)	EIF4G3	IESDSPCSSEALSKK			LDFIESDSPCpSSEALSK	1	S(6): 0.0; S(8): 0.4; S(11): 94.0; S(12): 5.6; S(16): 0.0	167	Forward	Class I
O43491	1	Band 4.1-like protein 2 OS=Homo sapiens GN=EPB41L2 PE=1 SV=1 - [E41L2_HUMAN]	O43491	S39	Band 4.1-like protein 2 (Generally expressed protein 4.1) (4.1G)	EPB41L2	ENQQNQSSDPEEEKG			EVAENQQNQSpSDPEEEK	1	S(10): 0.2; S(11): 99.8	321	Forward	Class I
O43491	1	Band 4.1-like protein 2 OS=Homo sapiens GN=EPB41L2 PE=1 SV=1 - [E41L2_HUMAN]	O43491	S58	Band 4.1-like protein 2 (Generally expressed protein 4.1) (4.1G)	EPB41L2	PAAESQSSLRRQKRE			GSQPPPAAESQSpSLRR	1	S(2): 0.0; S(10): 0.0; S(12): 0.3; S(13): 99.7	277	Forward	Class I
O43491	1	Band 4.1-like protein 2 OS=Homo sapiens GN=EPB41L2 PE=1 SV=1 - [E41L2_HUMAN]	O43491	S87	Band 4.1-like protein 2 (Generally expressed protein 4.1) (4.1G)	EPB41L2	PWLKKQKSYTLVVAK			pSYTLVVAK	1	S(1): 99.5; Y(2): 0.5; T(3): 0.0	95	Forward	Class I
O43491	1	Band 4.1-like protein 2 OS=Homo sapiens GN=EPB41L2 PE=1 SV=1 - [E41L2_HUMAN]	O43491	Y88	Band 4.1-like protein 2 (Generally expressed protein 4.1) (4.1G)	EPB41L2	WLKKQKSYTLVVAKD			SpYTLVVAK	1	S(1): 2.0; Y(2): 96.1; T(3): 2.0	94	Forward	Class I
O43491	1	Band 4.1-like protein 2 OS=Homo sapiens GN=EPB41L2 PE=1 SV=1 - [E41L2_HUMAN]	O43491	S499	Band 4.1-like protein 2 (Generally expressed protein 4.1) (4.1G)	EPB41L2	HTFYRLVSPEQPPKA			LVpSPEQPPK	1	S(3): 100.0	152	Forward	Class I
O43491;Q9Y2J2	2	Band 4.1-like protein 2 OS=Homo sapiens GN=EPB41L2 PE=1 SV=1 - [E41L2_HUMAN]|Band 4.1-like protein 3 OS=Homo sapiens GN=EPB41L3 PE=1 SV=2 - [E41L3_HUMAN]	O43491	T510	Band 4.1-like protein 2 (Generally expressed protein 4.1) (4.1G)	EPB41L2	PPKAKFLTLGSKFRY			FLpTLGSK	1	T(3): 100.0; S(6): 0.0	106	Forward	Class I	Q9Y2J2	T401	Band 4.1-like protein 3 (4.1B) (Differentially expressed in adenocarcinoma of the lung protein 1) (DAL-1)	EPB41L3 DAL1 KIAA0987
O43491	1	Band 4.1-like protein 2 OS=Homo sapiens GN=EPB41L2 PE=1 SV=1 - [E41L2_HUMAN]	O43491	S550	Band 4.1-like protein 2 (Generally expressed protein 4.1) (4.1G)	EPB41L2	SSKRVSRSLDGAPIG			pSLDGAPIGVMDQSLMK	1	S(1): 97.7; S(13): 2.3	34	Forward	Class I
O43491	1	Band 4.1-like protein 2 OS=Homo sapiens GN=EPB41L2 PE=1 SV=1 - [E41L2_HUMAN]	O43491	S614	Band 4.1-like protein 2 (Generally expressed protein 4.1) (4.1G)	EPB41L2	LIEGKKNSLRVEGDN			KNpSLRVEGDNIYVR	1	S(3): 100.0; Y(12): 0.0	285	Forward	Class I
O43491	1	Band 4.1-like protein 2 OS=Homo sapiens GN=EPB41L2 PE=1 SV=1 - [E41L2_HUMAN]	O43491	S683	Band 4.1-like protein 2 (Generally expressed protein 4.1) (4.1G)	EPB41L2	SLQTQGSSHETLNIV			ITPLSLQTQGSpSHETLNIVEEK	1	T(2): 0.0; S(5): 0.0; T(8): 0.0; S(11): 1.9; S(12): 96.2; T(15): 1.9	184	Forward	Class I
O43491	1	Band 4.1-like protein 2 OS=Homo sapiens GN=EPB41L2 PE=1 SV=1 - [E41L2_HUMAN]	O43491	T686	Band 4.1-like protein 2 (Generally expressed protein 4.1) (4.1G)	EPB41L2	TQGSSHETLNIVEEK			ITPLSLQTQGSSHEpTLNIVEEK	1	T(2): 0.0; S(5): 0.0; T(8): 0.0; S(11): 0.0; S(12): 1.5; T(15): 98.5	163	Forward	Class I
O43491	1	Band 4.1-like protein 2 OS=Homo sapiens GN=EPB41L2 PE=1 SV=1 - [E41L2_HUMAN]	O43491	S715	Band 4.1-like protein 2 (Generally expressed protein 4.1) (4.1G)	EPB41L2	EMNGKEISPGSGPGE			EIpSPGSGPGEIR	1	S(3): 100.0; S(6): 0.0	131	Forward	Class I
O43491	1	Band 4.1-like protein 2 OS=Homo sapiens GN=EPB41L2 PE=1 SV=1 - [E41L2_HUMAN]	O43491	S718	Band 4.1-like protein 2 (Generally expressed protein 4.1) (4.1G)	EPB41L2	GKEISPGSGPGEIRK			EISPGpSGPGEIR	1	S(3): 0.0; S(6): 100.0	126	Forward	Class I
O43493	1	Trans-Golgi network integral membrane protein 2 OS=Homo sapiens GN=TGOLN2 PE=1 SV=2 - [TGON2_HUMAN]	O43493	S71	Trans-Golgi network integral membrane protein 2 (TGN38 homolog) (TGN46) (TGN48) (Trans-Golgi network protein TGN51)	TGOLN2 TGN46 TGN51	KDSPSKSSAEAQTPE	Other/CK2	CK2a2	DSPSKSpSAEAQTPEDTPNK	1	S(2): 0.0; S(4): 0.0; S(6): 0.3; S(7): 99.7; T(12): 0.0; T(16): 0.0	361	Forward	Class I
O43493	1	Trans-Golgi network integral membrane protein 2 OS=Homo sapiens GN=TGOLN2 PE=1 SV=2 - [TGON2_HUMAN]	O43493	S224	Trans-Golgi network integral membrane protein 2 (TGN38 homolog) (TGN46) (TGN48) (Trans-Golgi network protein TGN51)	TGOLN2 TGN46 TGN51	PKDGSNKSGAEEQGP			DGSNKpSGAEEQGPIDGPSK	1	S(3): 0.0; S(6): 100.0; S(18): 0.0	421	Forward	Class I
O43493	1	Trans-Golgi network integral membrane protein 2 OS=Homo sapiens GN=TGOLN2 PE=1 SV=2 - [TGON2_HUMAN]	O43493	T296	Trans-Golgi network integral membrane protein 2 (TGN38 homolog) (TGN46) (TGN48) (Trans-Golgi network protein TGN51)	TGOLN2 TGN46 TGN51	LSPHAFKTESGEETD	Other/CK2	CK2a2	LSPHAFKpTESGEETDLISPPQEEVK	1	S(2): 0.0; T(8): 98.8; S(10): 1.2; T(14): 0.0; S(18): 0.0	285	Forward	Class I
O43493	1	Trans-Golgi network integral membrane protein 2 OS=Homo sapiens GN=TGOLN2 PE=1 SV=2 - [TGON2_HUMAN]	O43493	S298	Trans-Golgi network integral membrane protein 2 (TGN38 homolog) (TGN46) (TGN48) (Trans-Golgi network protein TGN51)	TGOLN2 TGN46 TGN51	PHAFKTESGEETDLI	Other/CK2	CK2a2	TEpSGEETDLISPPQEEVK	1	T(1): 0.2; S(3): 99.8; T(7): 0.0; S(11): 0.0	399	Forward	Class I
O43493	1	Trans-Golgi network integral membrane protein 2 OS=Homo sapiens GN=TGOLN2 PE=1 SV=2 - [TGON2_HUMAN]	O43493	S306	Trans-Golgi network integral membrane protein 2 (TGN38 homolog) (TGN46) (TGN48) (Trans-Golgi network protein TGN51)	TGOLN2 TGN46 TGN51	GEETDLISPPQEEVK	Other/CK2	CK2a2	LSPHAFKTESGEETDLIpSPPQEEVK	1	S(2): 0.0; T(8): 2.6; S(10): 2.6; T(14): 2.6; S(18): 92.3	71	Forward	Class I
O43516	1	WAS/WASL-interacting protein family member 1 OS=Homo sapiens GN=WIPF1 PE=1 SV=2 - [WIPF1_HUMAN]	O43516	T398	WAS/WASL-interacting protein family member 1 (Protein PRPL-2) (Wiskott-Aldrich syndrome protein-interacting protein) (WASP-interacting protein)	WIPF1 WASPIP WIP	TSRALPATPQLPSRS			ALPApTPQLPSR	1	T(5): 100.0; S(10): 0.0	79	Forward	Class I
O43524	1	Forkhead box protein O3 OS=Homo sapiens GN=FOXO3 PE=1 SV=1 - [FOXO3_HUMAN]	O43524	S284	Forkhead box protein O3 (AF6q21 protein) (Forkhead in rhabdomyosarcoma-like 1)	FOXO3 FKHRL1 FOXO3A	APESADDSPSQLSKW	Atypical/PDHK	PDHK4	AALQTAPESADDpSPSQLSK	1	T(5): 0.0; S(9): 0.0; S(13): 99.9; S(15): 0.1; S(18): 0.0	206	Forward	Class I
O43567	1	RING finger protein 13 OS=Homo sapiens GN=RNF13 PE=2 SV=1 - [RNF13_HUMAN]	O43567	T380	E3 ubiquitin-protein ligase RNF13 (EC 6.3.2.-) (RING finger protein 13)	RNF13 RZF	RDYNIANTV******			DYNIANpTV	1	Y(2): 0.0; T(7): 100.0	90	Forward	Class I
O43572	1	A kinase anchor protein 10, mitochondrial OS=Homo sapiens GN=AKAP10 PE=2 SV=2 - [AKA10_HUMAN]	O43572	S187	A-kinase anchor protein 10, mitochondrial (AKAP-10) (Dual specificity A kinase-anchoring protein 2) (D-AKAP-2) (Protein kinase A-anchoring protein 10) (PRKA10)	AKAP10	SSLAEPVSPSKKHET			QSSLAEPVpSPSK	1	S(2): 0.0; S(3): 0.0; S(9): 99.2; S(11): 0.8	187	Forward	Class I
O43572	1	A kinase anchor protein 10, mitochondrial OS=Homo sapiens GN=AKAP10 PE=2 SV=2 - [AKA10_HUMAN]	O43572	S189	A-kinase anchor protein 10, mitochondrial (AKAP-10) (Dual specificity A kinase-anchoring protein 2) (D-AKAP-2) (Protein kinase A-anchoring protein 10) (PRKA10)	AKAP10	LAEPVSPSKKHETTA			QSSLAEPVSPpSK	1	S(2): 0.0; S(3): 0.0; S(9): 6.4; S(11): 93.6	38	Forward	Class I
O43583	1	Density-regulated protein OS=Homo sapiens GN=DENR PE=1 SV=2 - [DENR_HUMAN]	O43583	S73	Density-regulated protein (DRP) (Protein DRP1) (Smooth muscle cell-associated protein 3) (SMAP-3)	DENR DRP1 H14	AKLTVENSPKQEAGI	CMGC/CDK/CDC2	CDC2	LTVENpSPKQEAGISEGQGTAGEEEEK	1	T(2): 0.0; S(6): 100.0; S(14): 0.0; T(19): 0.0	373	Forward	Class I
O43583	1	Density-regulated protein OS=Homo sapiens GN=DENR PE=1 SV=2 - [DENR_HUMAN]	O43583	T86	Density-regulated protein (DRP) (Protein DRP1) (Smooth muscle cell-associated protein 3) (SMAP-3)	DENR DRP1 H14	GISEGQGTAGEEEEK			QEAGISEGQGpTAGEEEEK	1	S(6): 0.0; T(11): 100.0	189	Forward	Class I
O43598	1	c-Myc-responsive protein Rcl OS=Homo sapiens GN=RCL PE=1 SV=1 - [RCL_HUMAN]	O43598	S169	Deoxyribonucleoside 5'-monophosphate N-glycosidase (EC 3.2.2.-) (c-Myc-responsive protein Rcl)	RCL C6orf108	PPGQVAASPDPTT**			YFEADPPGQVAApSPDPTT	1	Y(1): 0.0; S(13): 100.0; T(17): 0.0; T(18): 0.0	279	Forward	Class I
O43639	1	Cytoplasmic protein NCK2 OS=Homo sapiens GN=NCK2 PE=1 SV=2 - [NCK2_HUMAN]	O43639	S90	Cytoplasmic protein NCK2 (Growth factor receptor-bound protein 4) (NCK adaptor protein 2) (Nck-2) (SH2/SH3 adaptor protein NCK-beta)	NCK2 GRB4	KTSARDASPTPSTDA	CMGC/GSK	GSK3A	DApSPTPSTDAEYPANGSGADR	1	S(3): 100.0; T(5): 0.0; S(7): 0.0; T(8): 0.0; Y(12): 0.0; S(17): 0.0	324	Forward	Class I
O43684	1	Mitotic checkpoint protein BUB3 OS=Homo sapiens GN=BUB3 PE=1 SV=1 - [BUB3_HUMAN]	O43684	S211	Mitotic checkpoint protein BUB3	BUB3	AVEYLDPSPEVQKKK	CMGC/CDK/CDC2	CDC2	VAVEYLDPpSPEVQK	1	Y(5): 0.0; S(9): 100.0	242	Forward	Class I
O43684	1	Mitotic checkpoint protein BUB3 OS=Homo sapiens GN=BUB3 PE=1 SV=1 - [BUB3_HUMAN]	O43684	T328	Mitotic checkpoint protein BUB3	BUB3	TKPKSPCT*******			QVTDAETKPKSPCpT	1	T(3): 0.0; T(7): 0.0; S(11): 4.2; T(14): 95.8	261	Forward	Class I
O43707;P12814;P35609	3	Alpha-actinin-4 OS=Homo sapiens GN=ACTN4 PE=1 SV=2 - [ACTN4_HUMAN]|Alpha-actinin-1 OS=Homo sapiens GN=ACTN1 PE=1 SV=2 - [ACTN1_HUMAN]|Alpha-actinin-2 OS=Homo sapiens GN=ACTN2 PE=1 SV=1 - [ACTN2_HUMAN]	O43707	S159	Alpha-actinin-4 (F-actin cross-linking protein) (Non-muscle alpha-actinin 4)	ACTN4	RFAIQDISVEETSAK	CAMK/PKD	PKD1	FAIQDIpSVEETSAK	1	S(7): 100.0; T(11): 0.0; S(12): 0.0	230	Forward	Class I	P12814	S140	Alpha-actinin-1 (Alpha-actinin cytoskeletal isoform) (F-actin cross-linking protein) (Non-muscle alpha-actinin-1)	ACTN1	P35609	S147	Alpha-actinin-2 (Alpha-actinin skeletal muscle isoform 2) (F-actin cross-linking protein)	ACTN2
O43719	1	HIV Tat-specific factor 1 OS=Homo sapiens GN=HTATSF1 PE=1 SV=1 - [HTSF1_HUMAN]	O43719	S453	HIV Tat-specific factor 1 (Tat-SF1)	HTATSF1	ENNAKESSPEKEAEE	CMGC/CDK/CDC2	CDK2, CDK3	TEDGGEFEEGASENNAKESpSPEK	1	T(1): 0.0; S(12): 0.0; S(19): 1.2; S(20): 98.8	221	Forward	Class I
O43719	1	HIV Tat-specific factor 1 OS=Homo sapiens GN=HTATSF1 PE=1 SV=1 - [HTSF1_HUMAN]	O43719	S498	HIV Tat-specific factor 1 (Tat-SF1)	HTATSF1	VRGSEEDSPKKESKK	CMGC/CDK/CDC2	CDK2, CDK3	ESEEGNPVRGSEEDpSPKK	1	S(2): 0.0; S(11): 0.0; S(15): 100.0	269	Forward	Class I
O43719	1	HIV Tat-specific factor 1 OS=Homo sapiens GN=HTATSF1 PE=1 SV=1 - [HTSF1_HUMAN]	O43719	S529	HIV Tat-specific factor 1 (Tat-SF1)	HTATSF1	EDDLNKESEEEVGPT			ESEDDLNKEpSEEEVGPTK	1	S(2): 0.0; S(10): 100.0; T(17): 0.0	331	Forward	Class I
O43719	1	HIV Tat-specific factor 1 OS=Homo sapiens GN=HTATSF1 PE=1 SV=1 - [HTSF1_HUMAN]	O43719	S579	HIV Tat-specific factor 1 (Tat-SF1)	HTATSF1	KDLDEEGSEKELHEN			DLDEEGpSEKELHENVLDK	1	S(7): 100.0	240	Forward	Class I
O43719	1	HIV Tat-specific factor 1 OS=Homo sapiens GN=HTATSF1 PE=1 SV=1 - [HTSF1_HUMAN]	O43719	S616	HIV Tat-specific factor 1 (Tat-SF1)	HTATSF1	KVLDEEGSEREFDED			VLDEEGpSEREFDEDpSDEKEEEEDTYEK	2	S(7): 100.0; S(15): 100.0; T(24): 0.0; Y(25): 0.0	172	Forward	Class I
O43719	1	HIV Tat-specific factor 1 OS=Homo sapiens GN=HTATSF1 PE=1 SV=1 - [HTSF1_HUMAN]	O43719	S624	HIV Tat-specific factor 1 (Tat-SF1)	HTATSF1	EREFDEDSDEKEEEE			VLDEEGpSEREFDEDpSDEKEEEEDTYEK	2	S(7): 100.0; S(15): 100.0; T(24): 0.0; Y(25): 0.0	172	Forward	Class I
O43719	1	HIV Tat-specific factor 1 OS=Homo sapiens GN=HTATSF1 PE=1 SV=1 - [HTSF1_HUMAN]	O43719	S642	HIV Tat-specific factor 1 (Tat-SF1)	HTATSF1	EKVFDDESDEKEDEE			VFDDEpSDEKEDEEYADEK	1	S(6): 100.0; Y(14): 0.0	248	Forward	Class I
O43719	1	HIV Tat-specific factor 1 OS=Homo sapiens GN=HTATSF1 PE=1 SV=1 - [HTSF1_HUMAN]	O43719	S676	HIV Tat-specific factor 1 (Tat-SF1)	HTATSF1	DEKLFEESDDKEDED			LFEEpSDDKEDEDADGK	1	S(5): 100.0	411	Forward	Class I
O43719	1	HIV Tat-specific factor 1 OS=Homo sapiens GN=HTATSF1 PE=1 SV=1 - [HTSF1_HUMAN]	O43719	S702	HIV Tat-specific factor 1 (Tat-SF1)	HTATSF1	KLFEDDDSNEKLFDE			LFEDDDpSNEKLFDEEEDSSEK	1	S(7): 100.0; S(18): 0.0; S(19): 0.0	309	Forward	Class I
O43719	1	HIV Tat-specific factor 1 OS=Homo sapiens GN=HTATSF1 PE=1 SV=1 - [HTSF1_HUMAN]	O43719	S713	HIV Tat-specific factor 1 (Tat-SF1)	HTATSF1	LFDEEEDSSEKLFDD			LFDEEEDpSSEK	1	S(8): 98.8; S(9): 1.2	108	Forward	Class I
O43741	1	5'-AMP-activated protein kinase subunit beta-2 OS=Homo sapiens GN=PRKAB2 PE=1 SV=1 - [AAKB2_HUMAN]	O43741	S39	5'-AMP-activated protein kinase subunit beta-2 (AMPK subunit beta-2)	PRKAB2	EHKIMVGSTDDPSVF	Atypical/PIKK/FRAP	FRAP	IMVGpSTDDPSVFSLPDSK	1	S(5): 99.4; T(6): 0.6; S(10): 0.0; S(13): 0.0; S(17): 0.0	217	Forward	Class I
O43741	1	5'-AMP-activated protein kinase subunit beta-2 OS=Homo sapiens GN=PRKAB2 PE=1 SV=1 - [AAKB2_HUMAN]	O43741	S183	5'-AMP-activated protein kinase subunit beta-2 (AMPK subunit beta-2)	PRKAB2	TSCRDLSSSPPGPYG			DLSpSSPPGPYGQEMYAFR	1	S(3): 0.7; S(4): 98.7; S(5): 0.7; Y(10): 0.0; Y(15): 0.0	232	Forward	Class I
O43741	1	5'-AMP-activated protein kinase subunit beta-2 OS=Homo sapiens GN=PRKAB2 PE=1 SV=1 - [AAKB2_HUMAN]	O43741	S184	5'-AMP-activated protein kinase subunit beta-2 (AMPK subunit beta-2)	PRKAB2	SCRDLSSSPPGPYGQ	Atypical/PIKK/FRAP	FRAP	DLSSpSPPGPYGQEMYAFR	1	S(3): 0.0; S(4): 0.0; S(5): 100.0; Y(10): 0.0; Y(15): 0.0	307	Forward	Class I
O43741	1	5'-AMP-activated protein kinase subunit beta-2 OS=Homo sapiens GN=PRKAB2 PE=1 SV=1 - [AAKB2_HUMAN]	O43741	Y263	5'-AMP-activated protein kinase subunit beta-2 (AMPK subunit beta-2)	PRKAB2	THRYKKKYVTTLLYK			pYVTTLLYKPI	1	Y(1): 100.0; T(3): 0.0; T(4): 0.0; Y(7): 0.0	73	Forward	Class I
O43752	1	Syntaxin-6 OS=Homo sapiens GN=STX6 PE=1 SV=1 - [STX6_HUMAN]	O43752	S129	Syntaxin-6	STX6	ALLGDSGSQNWSTGT			QALLGDSGpSQNWSTGTTDK	1	S(7): 0.4; S(9): 99.6; S(13): 0.0; T(14): 0.0; T(16): 0.0; T(17): 0.0	144	Forward	Class I
O43765	1	Small glutamine-rich tetratricopeptide repeat-containing protein alpha OS=Homo sapiens GN=SGTA PE=1 SV=1 - [SGTA_HUMAN]	O43765	S77	Small glutamine-rich tetratricopeptide repeat-containing protein alpha (Alpha-SGT) (Vpu-binding protein) (UBP)	SGTA SGT SGT1	EMPQDLRSPARTPPS	Atypical/PIKK/FRAP	FRAP	EMPQDLRpSPARpTPPSEEDSAEAER	2	S(8): 100.0; T(12): 100.0; S(15): 0.0; S(19): 0.0	267	Forward	Class I
O43765	1	Small glutamine-rich tetratricopeptide repeat-containing protein alpha OS=Homo sapiens GN=SGTA PE=1 SV=1 - [SGTA_HUMAN]	O43765	T81	Small glutamine-rich tetratricopeptide repeat-containing protein alpha (Alpha-SGT) (Vpu-binding protein) (UBP)	SGTA SGT SGT1	DLRSPARTPPSEEDS	Atypical/PIKK/FRAP	FRAP	SPARpTPPSEEDSAEAER	1	S(1): 0.0; T(5): 99.8; S(8): 0.2; S(12): 0.0	300	Forward	Class I
O43765	1	Small glutamine-rich tetratricopeptide repeat-containing protein alpha OS=Homo sapiens GN=SGTA PE=1 SV=1 - [SGTA_HUMAN]	O43765	S301	Small glutamine-rich tetratricopeptide repeat-containing protein alpha (Alpha-SGT) (Vpu-binding protein) (UBP)	SGTA SGT SGT1	QLRSQIRSRTPSASN	AGC/AKT	AKT1	SQIRpSRTPpSASNDDQQE	2	S(1): 0.0; S(5): 93.4; T(7): 13.3; S(9): 93.4; S(11): 0.0	181	Forward	Class I
O43765	1	Small glutamine-rich tetratricopeptide repeat-containing protein alpha OS=Homo sapiens GN=SGTA PE=1 SV=1 - [SGTA_HUMAN]	O43765	S305	Small glutamine-rich tetratricopeptide repeat-containing protein alpha (Alpha-SGT) (Vpu-binding protein) (UBP)	SGTA SGT SGT1	QIRSRTPSASNDDQQ	AGC/AKT	AKT1	SQIRpSRTPpSASNDDQQE	2	S(1): 0.0; S(5): 93.4; T(7): 13.3; S(9): 93.4; S(11): 0.0	181	Forward	Class I
O43815	1	Striatin OS=Homo sapiens GN=STRN PE=1 SV=4 - [STRN_HUMAN]	O43815	S227	Striatin	STRN	AKSELTDSASVLDNF			SELTDpSASVLDNFK	1	S(1): 0.0; T(4): 0.0; S(6): 99.8; S(8): 0.2	130	Forward	Class I
O43815	1	Striatin OS=Homo sapiens GN=STRN PE=1 SV=4 - [STRN_HUMAN]	O43815	S245	Striatin	STRN	ESAAADFSDEDEDDD			FLESAAADFpSDEDEDDDVDGREK	1	S(4): 0.0; S(10): 100.0	347	Forward	Class I
O43815	1	Striatin OS=Homo sapiens GN=STRN PE=1 SV=4 - [STRN_HUMAN]	O43815	S373	Striatin	STRN	ELPSLQPSVGSPSRP			DVDELPSLQPpSVGSPSRPSSSR	1	S(7): 1.5; S(11): 95.5; S(14): 1.5; S(16): 1.5; S(19): 0.0; S(20): 0.0; S(21): 0.0	103	Forward	Class I
O43823	1	A-kinase anchor protein 8 OS=Homo sapiens GN=AKAP8 PE=1 SV=1 - [AKAP8_HUMAN]	O43823	S328	A-kinase anchor protein 8 (AKAP-8) (A-kinase anchor protein 95 kDa) (AKAP 95)	AKAP8 AKAP95	VDSEGDFSENDDAAG			VDSEGDFpSENDDAAGDFR	1	S(3): 0.0; S(8): 100.0	275	Forward	Class I
O43847	1	Nardilysin OS=Homo sapiens GN=NRD1 PE=2 SV=2 - [NRDC_HUMAN]	O43847	S86	Nardilysin (EC 3.4.24.61) (N-arginine dibasic convertase) (NRD convertase) (NRD-C)	NRD1	ARLGADESEEEGRRG			LGADEpSEEEGRRGSLSNAGDPEIVK	1	S(6): 94.2; S(14): 2.9; S(16): 2.9	94	Forward	Class I
O43847	1	Nardilysin OS=Homo sapiens GN=NRD1 PE=2 SV=2 - [NRDC_HUMAN]	O43847	S94	Nardilysin (EC 3.4.24.61) (N-arginine dibasic convertase) (NRD convertase) (NRD-C)	NRD1	EEEGRRGSLSNAGDP			RGpSLSNAGDPEIVK	1	S(3): 100.0; S(5): 0.0	267	Forward	Class I
O43847	1	Nardilysin OS=Homo sapiens GN=NRD1 PE=2 SV=2 - [NRDC_HUMAN]	O43847	S96	Nardilysin (EC 3.4.24.61) (N-arginine dibasic convertase) (NRD convertase) (NRD-C)	NRD1	EGRRGSLSNAGDPEI			LGADESEEEGRRGSLpSNAGDPEIVK	1	S(6): 0.0; S(14): 1.4; S(16): 98.6	150	Forward	Class I
O43852	1	Calumenin OS=Homo sapiens GN=CALU PE=1 SV=2 - [CALU_HUMAN]	O43852	S44	Calumenin (Crocalbin) (IEF SSP 9302)	CALU	KVHNDAQSFDYDHDA			VHNDAQpSFDYDHDAFLGAEEAK	1	S(7): 100.0; Y(10): 0.0	248	Forward	Class I
O43896	1	Kinesin-like protein KIF1C OS=Homo sapiens GN=KIF1C PE=1 SV=3 - [KIF1C_HUMAN]	O43896	S915	Kinesin-like protein KIF1C	KIF1C KIAA0706	MPSARPPSPPLSSWE			MPSARPPpSPPLSSWER	1	S(3): 0.0; S(8): 99.4; S(12): 0.6; S(13): 0.0	199	Forward	Class I
O43896	1	Kinesin-like protein KIF1C OS=Homo sapiens GN=KIF1C PE=1 SV=3 - [KIF1C_HUMAN]	O43896	Y1078	Kinesin-like protein KIF1C	KIF1C KIAA0706	QRPPGPRYPPYTTPP			pYPPYTTPPR	1	Y(1): 100.0; Y(4): 0.0; T(5): 0.0; T(6): 0.0	124	Forward	Class I
O43896	1	Kinesin-like protein KIF1C OS=Homo sapiens GN=KIF1C PE=1 SV=3 - [KIF1C_HUMAN]	O43896	S1092	Kinesin-like protein KIF1C	KIF1C KIAA0706	PRMRRQRSAPDLKES	Other/CK2	CK2a1, CK2a2	QRpSAPDLK	1	S(3): 100.0	177	Forward	Class I
O43933	1	Peroxisome biogenesis factor 1 OS=Homo sapiens GN=PEX1 PE=1 SV=1 - [PEX1_HUMAN]	O43933	S1211	Peroxisome biogenesis factor 1 (Peroxin-1) (Peroxisome biogenesis disorder protein 1)	PEX1	KGRYRSQSGEDESMN			SQpSGEDESMNQPGPIK	1	S(1): 0.3; S(3): 99.7; S(8): 0.0	329	Forward	Class I
O60220	1	Mitochondrial import inner membrane translocase subunit Tim8 A OS=Homo sapiens GN=TIMM8A PE=1 SV=1 - [TIM8A_HUMAN]	O60220	S94	Mitochondrial import inner membrane translocase subunit Tim8 A (Deafness dystonia protein 1) (X-linked deafness dystonia protein)	TIMM8A DDP DDP1 TIM8A	SKPVFSESLSD****	TKL/MLK	MLK3	SKPVFSEpSLSD	1	S(1): 0.0; S(6): 0.0; S(8): 99.2; S(10): 0.8	72	Forward	Class I
O60220	1	Mitochondrial import inner membrane translocase subunit Tim8 A OS=Homo sapiens GN=TIMM8A PE=1 SV=1 - [TIM8A_HUMAN]	O60220	S96	Mitochondrial import inner membrane translocase subunit Tim8 A (Deafness dystonia protein 1) (X-linked deafness dystonia protein)	TIMM8A DDP DDP1 TIM8A	PVFSESLSD******	TKL/MLK	MLK3	SKPVFSESLpSD	1	S(1): 0.0; S(6): 0.0; S(8): 0.0; S(10): 100.0	102	Forward	Class I
O60229;O75962	2	Kalirin OS=Homo sapiens GN=KALRN PE=1 SV=2 - [KALRN_HUMAN]|Triple functional domain protein OS=Homo sapiens GN=TRIO PE=1 SV=1 - [TRIO_HUMAN]	O60229	S1005	Kalirin (EC 2.7.11.1) (Huntingtin-associated protein-interacting protein) (Protein Duo) (Serine/threonine-protein kinase with Dbl- and pleckstrin homology domain)	KALRN DUET DUO HAPIP TRAD	RLKLVNASVAFYKTS			LVNApSVAFpYK	2	S(5): 100.0; Y(9): 100.0	108	Forward	Class I	O75962	S954	Triple functional domain protein (EC 2.7.11.1) (PTPRF-interacting protein)	TRIO
O60229;O75962	2	Kalirin OS=Homo sapiens GN=KALRN PE=1 SV=2 - [KALRN_HUMAN]|Triple functional domain protein OS=Homo sapiens GN=TRIO PE=1 SV=1 - [TRIO_HUMAN]	O60229	Y1009	Kalirin (EC 2.7.11.1) (Huntingtin-associated protein-interacting protein) (Protein Duo) (Serine/threonine-protein kinase with Dbl- and pleckstrin homology domain)	KALRN DUET DUO HAPIP TRAD	VNASVAFYKTSEQVC			LVNApSVAFpYK	2	S(5): 100.0; Y(9): 100.0	108	Forward	Class I	O75962	Y958	Triple functional domain protein (EC 2.7.11.1) (PTPRF-interacting protein)	TRIO
O60229;O75962	2	Kalirin OS=Homo sapiens GN=KALRN PE=1 SV=2 - [KALRN_HUMAN]|Triple functional domain protein OS=Homo sapiens GN=TRIO PE=1 SV=1 - [TRIO_HUMAN]	O60229	S1773	Kalirin (EC 2.7.11.1) (Huntingtin-associated protein-interacting protein) (Protein Duo) (Serine/threonine-protein kinase with Dbl- and pleckstrin homology domain)	KALRN DUET DUO HAPIP TRAD	TLKKWLTSPVRRLNS			WLTpSPVR	1	T(3): 1.0; S(4): 99.0	67	Forward	Class I	O75962	S1720	Triple functional domain protein (EC 2.7.11.1) (PTPRF-interacting protein)	TRIO
O60229	1	Kalirin OS=Homo sapiens GN=KALRN PE=1 SV=2 - [KALRN_HUMAN]	O60229	S2279	Kalirin (EC 2.7.11.1) (Huntingtin-associated protein-interacting protein) (Protein Duo) (Serine/threonine-protein kinase with Dbl- and pleckstrin homology domain)	KALRN DUET DUO HAPIP TRAD	SEKPPKGSSYNPPLP			GpSSYNPPLPPLK	1	S(2): 91.1; S(3): 8.8; Y(4): 0.0	61	Forward	Class I
O60231	1	Putative pre-mRNA-splicing factor ATP-dependent RNA helicase DHX16 OS=Homo sapiens GN=DHX16 PE=1 SV=2 - [DHX16_HUMAN]	O60231	S103	Putative pre-mRNA-splicing factor ATP-dependent RNA helicase DHX16 (EC 3.6.4.13) (ATP-dependent RNA helicase #3) (DEAH-box protein 16)	DHX16 DBP2 DDX16 KIAA0577	SYRLLEDSEESSEET			LLEDpSEEpSSEETVSR	2	S(5): 100.0; S(8): 97.9; S(9): 2.1; T(12): 0.0; S(14): 0.0	374	Forward	Class I
O60231	1	Putative pre-mRNA-splicing factor ATP-dependent RNA helicase DHX16 OS=Homo sapiens GN=DHX16 PE=1 SV=2 - [DHX16_HUMAN]	O60231	S106	Putative pre-mRNA-splicing factor ATP-dependent RNA helicase DHX16 (EC 3.6.4.13) (ATP-dependent RNA helicase #3) (DEAH-box protein 16)	DHX16 DBP2 DDX16 KIAA0577	LLEDSEESSEETVSR			LLEDpSEEpSSEETVSR	2	S(5): 100.0; S(8): 97.9; S(9): 2.1; T(12): 0.0; S(14): 0.0	374	Forward	Class I
O60231	1	Putative pre-mRNA-splicing factor ATP-dependent RNA helicase DHX16 OS=Homo sapiens GN=DHX16 PE=1 SV=2 - [DHX16_HUMAN]	O60231	S160	Putative pre-mRNA-splicing factor ATP-dependent RNA helicase DHX16 (EC 3.6.4.13) (ATP-dependent RNA helicase #3) (DEAH-box protein 16)	DHX16 DBP2 DDX16 KIAA0577	QQTEKPESEDEWERT			QQTEKPEpSEDEWER	1	T(3): 0.0; S(8): 100.0	413	Forward	Class I
O60237	1	Protein phosphatase 1 regulatory subunit 12B OS=Homo sapiens GN=PPP1R12B PE=1 SV=2 - [MYPT2_HUMAN]	O60237	S310	Protein phosphatase 1 regulatory subunit 12B (Myosin phosphatase-targeting subunit 2) (Myosin phosphatase target subunit 2)	PPP1R12B MYPT2	KKQNVLRSEKETRNK			QNVLRpSEKETR	1	S(6): 100.0; T(10): 0.0	81	Forward	Class I
O60237	1	Protein phosphatase 1 regulatory subunit 12B OS=Homo sapiens GN=PPP1R12B PE=1 SV=2 - [MYPT2_HUMAN]	O60237	Y493	Protein phosphatase 1 regulatory subunit 12B (Myosin phosphatase-targeting subunit 2) (Myosin phosphatase target subunit 2)	PPP1R12B MYPT2	KERENKSYISSLAPR			ENKSpYISpSLAPRK	2	S(4): 0.4; Y(5): 99.2; S(7): 0.8; S(8): 99.6	115	Forward	Class I
O60237	1	Protein phosphatase 1 regulatory subunit 12B OS=Homo sapiens GN=PPP1R12B PE=1 SV=2 - [MYPT2_HUMAN]	O60237	S496	Protein phosphatase 1 regulatory subunit 12B (Myosin phosphatase-targeting subunit 2) (Myosin phosphatase target subunit 2)	PPP1R12B MYPT2	ENKSYISSLAPRKLN			ENKSpYISpSLAPRK	2	S(4): 0.4; Y(5): 99.2; S(7): 0.8; S(8): 99.6	115	Forward	Class I
O60238	1	BCL2/adenovirus E1B 19 kDa protein-interacting protein 3-like OS=Homo sapiens GN=BNIP3L PE=1 SV=1 - [BNI3L_HUMAN]	O60238	S62	BCL2/adenovirus E1B 19 kDa protein-interacting protein 3-like (Adenovirus E1B19K-binding protein B5) (BCL2/adenovirus E1B 19 kDa protein-interacting protein 3A) (NIP3-like protein X) (NIP3L)	BNIP3L BNIP3A BNIP3H NIX	GGLEHVPSSSSIHNG			NGGLEHVPpSSSSIHNGDMEK	1	S(9): 100.0; S(10): 0.0; S(11): 0.0; S(12): 0.0	264	Forward	Class I
O60238	1	BCL2/adenovirus E1B 19 kDa protein-interacting protein 3-like OS=Homo sapiens GN=BNIP3L PE=1 SV=1 - [BNI3L_HUMAN]	O60238	S65	BCL2/adenovirus E1B 19 kDa protein-interacting protein 3-like (Adenovirus E1B19K-binding protein B5) (BCL2/adenovirus E1B 19 kDa protein-interacting protein 3A) (NIP3-like protein X) (NIP3L)	BNIP3L BNIP3A BNIP3H NIX	EHVPSSSSIHNGDME			NGGLEHVPSSSpSIHNGDMEK	1	S(9): 0.0; S(10): 0.0; S(11): 3.7; S(12): 96.3	389	Forward	Class I
O60238	1	BCL2/adenovirus E1B 19 kDa protein-interacting protein 3-like OS=Homo sapiens GN=BNIP3L PE=1 SV=1 - [BNI3L_HUMAN]	O60238	S118	BCL2/adenovirus E1B 19 kDa protein-interacting protein 3-like (Adenovirus E1B19K-binding protein B5) (BCL2/adenovirus E1B 19 kDa protein-interacting protein 3A) (NIP3-like protein X) (NIP3L)	BNIP3L BNIP3A BNIP3H NIX	HTSRDHSSQSEEEVV			DHSpSQSEEEVVEGEK	1	S(3): 0.3; S(4): 99.4; S(6): 0.3	124	Forward	Class I
O60238	1	BCL2/adenovirus E1B 19 kDa protein-interacting protein 3-like OS=Homo sapiens GN=BNIP3L PE=1 SV=1 - [BNI3L_HUMAN]	O60238	S120	BCL2/adenovirus E1B 19 kDa protein-interacting protein 3-like (Adenovirus E1B19K-binding protein B5) (BCL2/adenovirus E1B 19 kDa protein-interacting protein 3A) (NIP3-like protein X) (NIP3L)	BNIP3L BNIP3A BNIP3H NIX	SRDHSSQSEEEVVEG			DHSSQpSEEEVVEGEK	1	S(3): 0.0; S(4): 0.0; S(6): 100.0	373	Forward	Class I
O60238	1	BCL2/adenovirus E1B 19 kDa protein-interacting protein 3-like OS=Homo sapiens GN=BNIP3L PE=1 SV=1 - [BNI3L_HUMAN]	O60238	S166	BCL2/adenovirus E1B 19 kDa protein-interacting protein 3-like (Adenovirus E1B19K-binding protein B5) (BCL2/adenovirus E1B 19 kDa protein-interacting protein 3A) (NIP3-like protein X) (NIP3L)	BNIP3L BNIP3A BNIP3H NIX	RHPKRSVSLSMRKSG			RSVpSLSMR	1	S(2): 0.0; S(4): 99.1; S(6): 0.9	84	Forward	Class I
O60244	1	Mediator of RNA polymerase II transcription subunit 14 OS=Homo sapiens GN=MED14 PE=1 SV=2 - [MED14_HUMAN]	O60244	S1112	Mediator of RNA polymerase II transcription subunit 14 (Activator-recruited cofactor 150 kDa component) (ARC150) (Cofactor required for Sp1 transcriptional activation subunit 2) (CRSP complex subunit 2) (Mediator complex subunit 14) (RGR1 homolog) (hRGR1) (Thyroid hormone receptor-associated protein complex 170 kDa component) (Trap170) (Transcriptional coactivator CRSP150) (Vitamin D3 receptor-in…	MED14 ARC150 CRSP2 CXorf4 DRIP150 EXLM1 RGR1 TRAP170	RAGNWPGSPQVSGPS	CMGC/CDK	CDK11, CDK7, CDK8	AGNWPGpSPQVSGPpSPAAR	2	S(7): 100.0; S(11): 0.0; S(14): 100.0	207	Forward	Class I
O60244	1	Mediator of RNA polymerase II transcription subunit 14 OS=Homo sapiens GN=MED14 PE=1 SV=2 - [MED14_HUMAN]	O60244	S1119	Mediator of RNA polymerase II transcription subunit 14 (Activator-recruited cofactor 150 kDa component) (ARC150) (Cofactor required for Sp1 transcriptional activation subunit 2) (CRSP complex subunit 2) (Mediator complex subunit 14) (RGR1 homolog) (hRGR1) (Thyroid hormone receptor-associated protein complex 170 kDa component) (Trap170) (Transcriptional coactivator CRSP150) (Vitamin D3 receptor-in…	MED14 ARC150 CRSP2 CXorf4 DRIP150 EXLM1 RGR1 TRAP170	SPQVSGPSPAARMPG	CMGC/CDK	CDK11, CDK7, CDK8	AGNWPGpSPQVSGPpSPAAR	2	S(7): 100.0; S(11): 0.0; S(14): 100.0	207	Forward	Class I
O60245	1	Protocadherin-7 OS=Homo sapiens GN=PCDH7 PE=1 SV=1 - [PCDH7_HUMAN]	O60245	S989	Protocadherin-7 (Brain-heart protocadherin) (BH-Pcdh)	PCDH7 BHPCDH	SVNGGPGSPDLARHY			SVNGGPGpSPDLAR	1	S(1): 0.0; S(8): 100.0	250	Forward	Class I
O60245	1	Protocadherin-7 OS=Homo sapiens GN=PCDH7 PE=1 SV=1 - [PCDH7_HUMAN]	O60245	S1011	Protocadherin-7 (Brain-heart protocadherin) (BH-Pcdh)	PCDH7 BHPCDH	TVQLHPQSPTAGKKH	Other/IKK	IKKa, IKKb	SSSPLPTVQLHPQpSPTAGK	1	S(1): 0.0; S(2): 0.0; S(3): 0.0; T(7): 0.0; S(14): 100.0; T(16): 0.0	274	Forward	Class I
O60264	1	SWI/SNF-related matrix-associated actin-dependent regulator of chromatin subfamily A member 5 OS=Homo sapiens GN=SMARCA5 PE=1 SV=1 - [SMCA5_HUMAN]	O60264	S66	SWI/SNF-related matrix-associated actin-dependent regulator of chromatin subfamily A member 5 (SWI/SNF-related matrix-associated actin-dependent regulator of chromatin A5) (EC 3.6.4.-) (Sucrose nonfermenting protein 2 homolog) (hSNF2H)	SMARCA5 SNF2H WCRF135	EEIFDDASPGKQKEI	CMGC/CDK/CDC2	CDK2	GGPEGVAAQAVASAASAGPADAEMEEIFDDApSPGK	1	S(13): 0.0; S(16): 0.0; S(32): 100.0	105	Forward	Class I
O60271	1	C-jun-amino-terminal kinase-interacting protein 4 OS=Homo sapiens GN=SPAG9 PE=1 SV=4 - [JIP4_HUMAN]	O60271	S183	C-Jun-amino-terminal kinase-interacting protein 4 (JIP-4) (JNK-interacting protein 4) (Cancer/testis antigen 89) (CT89) (Human lung cancer oncogene 6 protein) (HLC-6) (JNK-associated leucine-zipper protein) (JLP) (Mitogen-activated protein kinase 8-interacting protein 4) (Proliferation-inducing protein 6) (Protein highly expressed in testis) (PHET) (Sperm surface protein) (Sperm-associated antige…	SPAG9 HSS KIAA0516 MAPK8IP4 SYD1 HLC6	RTKLHQLSGSDQLES	Other/CK2	CK2a2	LHQLpSGSDQLESTAHSR	1	S(5): 100.0; S(7): 0.0; S(12): 0.0; T(13): 0.0; S(16): 0.0	318	Forward	Class I
O60271	1	C-jun-amino-terminal kinase-interacting protein 4 OS=Homo sapiens GN=SPAG9 PE=1 SV=4 - [JIP4_HUMAN]	O60271	S203	C-Jun-amino-terminal kinase-interacting protein 4 (JIP-4) (JNK-interacting protein 4) (Cancer/testis antigen 89) (CT89) (Human lung cancer oncogene 6 protein) (HLC-6) (JNK-associated leucine-zipper protein) (JLP) (Mitogen-activated protein kinase 8-interacting protein 4) (Proliferation-inducing protein 6) (Protein highly expressed in testis) (PHET) (Sperm surface protein) (Sperm-associated antige…	SPAG9 HSS KIAA0516 MAPK8IP4 SYD1 HLC6	IRKERPISLGIFPLP			ERPIpSLGIFPLPAGDGLLpTPDAQK	2	S(5): 100.0; T(19): 100.0	116	Forward	Class I
O60271	1	C-jun-amino-terminal kinase-interacting protein 4 OS=Homo sapiens GN=SPAG9 PE=1 SV=4 - [JIP4_HUMAN]	O60271	T217	C-Jun-amino-terminal kinase-interacting protein 4 (JIP-4) (JNK-interacting protein 4) (Cancer/testis antigen 89) (CT89) (Human lung cancer oncogene 6 protein) (HLC-6) (JNK-associated leucine-zipper protein) (JLP) (Mitogen-activated protein kinase 8-interacting protein 4) (Proliferation-inducing protein 6) (Protein highly expressed in testis) (PHET) (Sperm surface protein) (Sperm-associated antige…	SPAG9 HSS KIAA0516 MAPK8IP4 SYD1 HLC6	PAGDGLLTPDAQKGG	CMGC/MAPK	p38a	ERPISLGIFPLPAGDGLLpTPDAQK	1	S(5): 0.0; T(19): 100.0	246	Forward	Class I
O60271	1	C-jun-amino-terminal kinase-interacting protein 4 OS=Homo sapiens GN=SPAG9 PE=1 SV=4 - [JIP4_HUMAN]	O60271	S332	C-Jun-amino-terminal kinase-interacting protein 4 (JIP-4) (JNK-interacting protein 4) (Cancer/testis antigen 89) (CT89) (Human lung cancer oncogene 6 protein) (HLC-6) (JNK-associated leucine-zipper protein) (JLP) (Mitogen-activated protein kinase 8-interacting protein 4) (Proliferation-inducing protein 6) (Protein highly expressed in testis) (PHET) (Sperm surface protein) (Sperm-associated antige…	SPAG9 HSS KIAA0516 MAPK8IP4 SYD1 HLC6	TRNVSTGSAENEEKS	Other/CK2	CK2a2	NVSTGpSAENEEK	1	S(3): 0.0; T(4): 0.0; S(6): 100.0	148	Forward	Class I
O60271	1	C-jun-amino-terminal kinase-interacting protein 4 OS=Homo sapiens GN=SPAG9 PE=1 SV=4 - [JIP4_HUMAN]	O60271	T365	C-Jun-amino-terminal kinase-interacting protein 4 (JIP-4) (JNK-interacting protein 4) (Cancer/testis antigen 89) (CT89) (Human lung cancer oncogene 6 protein) (HLC-6) (JNK-associated leucine-zipper protein) (JLP) (Mitogen-activated protein kinase 8-interacting protein 4) (Proliferation-inducing protein 6) (Protein highly expressed in testis) (PHET) (Sperm surface protein) (Sperm-associated antige…	SPAG9 HSS KIAA0516 MAPK8IP4 SYD1 HLC6	SGYKGSSTPTKGIEN			DLSGYKGSSpTPTK	1	S(3): 0.0; Y(5): 0.0; S(8): 0.0; S(9): 0.0; T(10): 100.0; T(12): 0.0	309	Forward	Class I
O60271	1	C-jun-amino-terminal kinase-interacting protein 4 OS=Homo sapiens GN=SPAG9 PE=1 SV=4 - [JIP4_HUMAN]	O60271	S593	C-Jun-amino-terminal kinase-interacting protein 4 (JIP-4) (JNK-interacting protein 4) (Cancer/testis antigen 89) (CT89) (Human lung cancer oncogene 6 protein) (HLC-6) (JNK-associated leucine-zipper protein) (JLP) (Mitogen-activated protein kinase 8-interacting protein 4) (Proliferation-inducing protein 6) (Protein highly expressed in testis) (PHET) (Sperm surface protein) (Sperm-associated antige…	SPAG9 HSS KIAA0516 MAPK8IP4 SYD1 HLC6	TPSVKKRSSTLSQLP			KRpSSTLSQLPGDK	1	S(3): 99.6; S(4): 0.4; T(5): 0.0; S(7): 0.0	91	Forward	Class I
O60271	1	C-jun-amino-terminal kinase-interacting protein 4 OS=Homo sapiens GN=SPAG9 PE=1 SV=4 - [JIP4_HUMAN]	O60271	T595	C-Jun-amino-terminal kinase-interacting protein 4 (JIP-4) (JNK-interacting protein 4) (Cancer/testis antigen 89) (CT89) (Human lung cancer oncogene 6 protein) (HLC-6) (JNK-associated leucine-zipper protein) (JLP) (Mitogen-activated protein kinase 8-interacting protein 4) (Proliferation-inducing protein 6) (Protein highly expressed in testis) (PHET) (Sperm surface protein) (Sperm-associated antige…	SPAG9 HSS KIAA0516 MAPK8IP4 SYD1 HLC6	SVKKRSSTLSQLPGD			RSSpTLSQLPGDK	1	S(2): 0.0; S(3): 0.3; T(4): 99.7; S(6): 0.0	281	Forward	Class I
O60271	1	C-jun-amino-terminal kinase-interacting protein 4 OS=Homo sapiens GN=SPAG9 PE=1 SV=4 - [JIP4_HUMAN]	O60271	S730	C-Jun-amino-terminal kinase-interacting protein 4 (JIP-4) (JNK-interacting protein 4) (Cancer/testis antigen 89) (CT89) (Human lung cancer oncogene 6 protein) (HLC-6) (JNK-associated leucine-zipper protein) (JLP) (Mitogen-activated protein kinase 8-interacting protein 4) (Proliferation-inducing protein 6) (Protein highly expressed in testis) (PHET) (Sperm surface protein) (Sperm-associated antige…	SPAG9 HSS KIAA0516 MAPK8IP4 SYD1 HLC6	GSKQRSASQSSLDKL	Other/CK2	CK2a2	SApSQSpSLDKLDQELK	2	S(1): 0.0; S(3): 100.0; S(5): 0.0; S(6): 100.0	395	Forward	Class I
O60271	1	C-jun-amino-terminal kinase-interacting protein 4 OS=Homo sapiens GN=SPAG9 PE=1 SV=4 - [JIP4_HUMAN]	O60271	S732	C-Jun-amino-terminal kinase-interacting protein 4 (JIP-4) (JNK-interacting protein 4) (Cancer/testis antigen 89) (CT89) (Human lung cancer oncogene 6 protein) (HLC-6) (JNK-associated leucine-zipper protein) (JLP) (Mitogen-activated protein kinase 8-interacting protein 4) (Proliferation-inducing protein 6) (Protein highly expressed in testis) (PHET) (Sperm surface protein) (Sperm-associated antige…	SPAG9 HSS KIAA0516 MAPK8IP4 SYD1 HLC6	KQRSASQSSLDKLDQ	Other/CK2	CK2a2	SASQpSpSLDKLDQELK	2	S(1): 0.0; S(3): 0.0; S(5): 100.0; S(6): 100.0	154	Forward	Class I
O60271	1	C-jun-amino-terminal kinase-interacting protein 4 OS=Homo sapiens GN=SPAG9 PE=1 SV=4 - [JIP4_HUMAN]	O60271	S733	C-Jun-amino-terminal kinase-interacting protein 4 (JIP-4) (JNK-interacting protein 4) (Cancer/testis antigen 89) (CT89) (Human lung cancer oncogene 6 protein) (HLC-6) (JNK-associated leucine-zipper protein) (JLP) (Mitogen-activated protein kinase 8-interacting protein 4) (Proliferation-inducing protein 6) (Protein highly expressed in testis) (PHET) (Sperm surface protein) (Sperm-associated antige…	SPAG9 HSS KIAA0516 MAPK8IP4 SYD1 HLC6	QRSASQSSLDKLDQE	Other/CK2	CK2a2	SApSQSpSLDKLDQELK	2	S(1): 0.0; S(3): 100.0; S(5): 0.0; S(6): 100.0	395	Forward	Class I
O60291	1	Probable E3 ubiquitin-protein ligase MGRN1 OS=Homo sapiens GN=MGRN1 PE=2 SV=2 - [MGRN1_HUMAN]	O60291	S515	E3 ubiquitin-protein ligase MGRN1 (EC 6.3.2.-) (Mahogunin RING finger protein 1) (RING finger protein 156)	MGRN1 KIAA0544 RNF156	QQGTRAASIENVLQD			AApSIENVLQDSSPEHCGR	1	S(3): 100.0; S(11): 0.0; S(12): 0.0	167	Forward	Class I
O60292	1	Signal-induced proliferation-associated 1-like protein 3 OS=Homo sapiens GN=SIPA1L3 PE=1 SV=3 - [SI1L3_HUMAN]	O60292	S100	Signal-induced proliferation-associated 1-like protein 3 (SIPA1-like protein 3) (SPA-1-like protein 3)	SIPA1L3 KIAA0545 SPAL3	LREHSNPSPSQDTDG			EALREHSNPpSPSQDTDGTK	1	S(7): 0.0; S(10): 100.0; S(12): 0.0; T(15): 0.0; T(18): 0.0	292	Forward	Class I
O60292	1	Signal-induced proliferation-associated 1-like protein 3 OS=Homo sapiens GN=SIPA1L3 PE=1 SV=3 - [SI1L3_HUMAN]	O60292	S158	Signal-induced proliferation-associated 1-like protein 3 (SIPA1-like protein 3) (SPA-1-like protein 3)	SIPA1L3 KIAA0545 SPAL3	FQDGWPRSPGRAFLP			DVEFQDGWPRpSPGR	1	S(11): 100.0	279	Forward	Class I
O60292	1	Signal-induced proliferation-associated 1-like protein 3 OS=Homo sapiens GN=SIPA1L3 PE=1 SV=3 - [SI1L3_HUMAN]	O60292	S172	Signal-induced proliferation-associated 1-like protein 3 (SIPA1-like protein 3) (SPA-1-like protein 3)	SIPA1L3 KIAA0545 SPAL3	PLRHRSSSEITLSEC			SSpSEITLSECDAEDAGEPR	1	S(1): 0.0; S(2): 0.0; S(3): 100.0; T(6): 0.0; S(8): 0.0	244	Forward	Class I
O60292	1	Signal-induced proliferation-associated 1-like protein 3 OS=Homo sapiens GN=SIPA1L3 PE=1 SV=3 - [SI1L3_HUMAN]	O60292	S401	Signal-induced proliferation-associated 1-like protein 3 (SIPA1-like protein 3) (SPA-1-like protein 3)	SIPA1L3 KIAA0545 SPAL3	GLDPAFTSTEDLNCK			AHSLGGLDPAFTpSTEDLNCK	1	S(3): 0.0; T(12): 0.4; S(13): 99.3; T(14): 0.4	378	Forward	Class I
O60292	1	Signal-induced proliferation-associated 1-like protein 3 OS=Homo sapiens GN=SIPA1L3 PE=1 SV=3 - [SI1L3_HUMAN]	O60292	Y669	Signal-induced proliferation-associated 1-like protein 3 (SIPA1-like protein 3) (SPA-1-like protein 3)	SIPA1L3 KIAA0545 SPAL3	CLKGFTKYAAQLDVK			pYAAQLDVK	1	Y(1): 100.0	98	Forward	Class I
O60292	1	Signal-induced proliferation-associated 1-like protein 3 OS=Homo sapiens GN=SIPA1L3 PE=1 SV=3 - [SI1L3_HUMAN]	O60292	S1364	Signal-induced proliferation-associated 1-like protein 3 (SIPA1-like protein 3) (SPA-1-like protein 3)	SIPA1L3 KIAA0545 SPAL3	ADRRREVSPAPAVAG			RREVpSPAPAVAGQSK	1	S(5): 100.0; S(14): 0.0	279	Forward	Class I
O60292	1	Signal-induced proliferation-associated 1-like protein 3 OS=Homo sapiens GN=SIPA1L3 PE=1 SV=3 - [SI1L3_HUMAN]	O60292	T1542	Signal-induced proliferation-associated 1-like protein 3 (SIPA1-like protein 3) (SPA-1-like protein 3)	SIPA1L3 KIAA0545 SPAL3	PQKGLQRTLSDESLC			pTLSDESLCSGR	1	T(1): 100.0; S(3): 0.0; S(6): 0.0; S(9): 0.0	96	Forward	Class I
O60292	1	Signal-induced proliferation-associated 1-like protein 3 OS=Homo sapiens GN=SIPA1L3 PE=1 SV=3 - [SI1L3_HUMAN]	O60292	S1544	Signal-induced proliferation-associated 1-like protein 3 (SIPA1-like protein 3) (SPA-1-like protein 3)	SIPA1L3 KIAA0545 SPAL3	KGLQRTLSDESLCSG			TLpSDESLCSGRR	1	T(1): 0.0; S(3): 100.0; S(6): 0.0; S(9): 0.0	216	Forward	Class I
O60292	1	Signal-induced proliferation-associated 1-like protein 3 OS=Homo sapiens GN=SIPA1L3 PE=1 SV=3 - [SI1L3_HUMAN]	O60292	T1703	Signal-induced proliferation-associated 1-like protein 3 (SIPA1-like protein 3) (SPA-1-like protein 3)	SIPA1L3 KIAA0545 SPAL3	GPPTPRTTPTMSEEP			TpTPTMSEEPPLDLTGK	1	T(1): 5.1; T(2): 89.9; T(4): 5.1; S(6): 0.0; T(14): 0.0	121	Forward	Class I
O60293	1	Coiled-coil domain-containing protein 131 OS=Homo sapiens GN=CCDC131 PE=1 SV=3 - [CC131_HUMAN]	O60293	S206	Zinc finger C3H1 domain-containing protein (Coiled-coil domain-containing protein 131) (Proline/serine-rich coiled-coil protein 2)	ZFC3H1 CCDC131 KIAA0546 PSRC2	SSKSFGRSPSRKQNY			SFGRpSPSRK	1	S(1): 0.0; S(5): 100.0; S(7): 0.0	182	Forward	Class I
O60293	1	Coiled-coil domain-containing protein 131 OS=Homo sapiens GN=CCDC131 PE=1 SV=3 - [CC131_HUMAN]	O60293	S352	Zinc finger C3H1 domain-containing protein (Coiled-coil domain-containing protein 131) (Proline/serine-rich coiled-coil protein 2)	ZFC3H1 CCDC131 KIAA0546 PSRC2	QNLTRRISTSDILSE			RIpSTSDILSEK	1	S(3): 98.8; T(4): 0.6; S(5): 0.6; S(9): 0.0	59	Forward	Class I
O60293	1	Coiled-coil domain-containing protein 131 OS=Homo sapiens GN=CCDC131 PE=1 SV=3 - [CC131_HUMAN]	O60293	T766	Zinc finger C3H1 domain-containing protein (Coiled-coil domain-containing protein 131) (Proline/serine-rich coiled-coil protein 2)	ZFC3H1 CCDC131 KIAA0546 PSRC2	KENDPLRTPEALPEE			ENDPLRpTPEALPEEK	1	T(7): 100.0	195	Forward	Class I
O60293	1	Coiled-coil domain-containing protein 131 OS=Homo sapiens GN=CCDC131 PE=1 SV=3 - [CC131_HUMAN]	O60293	S805	Zinc finger C3H1 domain-containing protein (Coiled-coil domain-containing protein 131) (Proline/serine-rich coiled-coil protein 2)	ZFC3H1 CCDC131 KIAA0546 PSRC2	QLKTSSSSPANSDVE			TSSSpSPANSDVEIDGIGR	1	T(1): 0.0; S(2): 0.0; S(3): 0.0; S(4): 0.3; S(5): 99.7; S(9): 0.0	155	Forward	Class I
O60293	1	Coiled-coil domain-containing protein 131 OS=Homo sapiens GN=CCDC131 PE=1 SV=3 - [CC131_HUMAN]	O60293	S949	Zinc finger C3H1 domain-containing protein (Coiled-coil domain-containing protein 131) (Proline/serine-rich coiled-coil protein 2)	ZFC3H1 CCDC131 KIAA0546 PSRC2	KMMRLDSSPVSSPRK			LDSpSPVSSPR	1	S(3): 0.8; S(4): 99.2; S(7): 0.0; S(8): 0.0	134	Forward	Class I
O60293	1	Coiled-coil domain-containing protein 131 OS=Homo sapiens GN=CCDC131 PE=1 SV=3 - [CC131_HUMAN]	O60293	S1303	Zinc finger C3H1 domain-containing protein (Coiled-coil domain-containing protein 131) (Proline/serine-rich coiled-coil protein 2)	ZFC3H1 CCDC131 KIAA0546 PSRC2	PISDNSFSSDEEQST			KPISDNSFpSpSDEEQSTGPIK	2	S(4): 0.0; S(7): 0.0; S(9): 100.0; S(10): 100.0; S(15): 0.0; T(16): 0.0	141	Forward	Class I
O60293	1	Coiled-coil domain-containing protein 131 OS=Homo sapiens GN=CCDC131 PE=1 SV=3 - [CC131_HUMAN]	O60293	S1304	Zinc finger C3H1 domain-containing protein (Coiled-coil domain-containing protein 131) (Proline/serine-rich coiled-coil protein 2)	ZFC3H1 CCDC131 KIAA0546 PSRC2	ISDNSFSSDEEQSTG			KPISDNSFpSpSDEEQSTGPIK	2	S(4): 0.0; S(7): 0.0; S(9): 100.0; S(10): 100.0; S(15): 0.0; T(16): 0.0	141	Forward	Class I
O60303	1	Uncharacterized protein KIAA0556 OS=Homo sapiens GN=KIAA0556 PE=2 SV=3 - [K0556_HUMAN]	O60303	S660	Uncharacterized protein KIAA0556	KIAA0556	KELGLGCSPPAETLA			ELGLGCpSPPAETLADAK	1	S(7): 100.0; T(12): 0.0	260	Forward	Class I
O60312	1	Probable phospholipid-transporting ATPase VA OS=Homo sapiens GN=ATP10A PE=2 SV=2 - [AT10A_HUMAN]	O60312	S501	Probable phospholipid-transporting ATPase VA (EC 3.6.3.1) (ATPase class V type 10A) (Aminophospholipid translocase VA)	ATP10A ATP10C ATPVA ATPVC KIAA0566	HRTQSTKSHRRTGSR			pSHRRpTGSR	2	S(1): 100.0; T(5): 100.0; S(7): 0.0	71	Forward	Class I
O60312	1	Probable phospholipid-transporting ATPase VA OS=Homo sapiens GN=ATP10A PE=2 SV=2 - [AT10A_HUMAN]	O60312	T505	Probable phospholipid-transporting ATPase VA (EC 3.6.3.1) (ATPase class V type 10A) (Aminophospholipid translocase VA)	ATP10A ATP10C ATPVA ATPVC KIAA0566	STKSHRRTGSRAEAK			pSHRRpTGSR	2	S(1): 100.0; T(5): 100.0; S(7): 0.0	71	Forward	Class I
O60315	1	Zinc finger E-box-binding homeobox 2 OS=Homo sapiens GN=ZEB2 PE=1 SV=1 - [ZEB2_HUMAN]	O60315	S353	Zinc finger E-box-binding homeobox 2 (Smad-interacting protein 1) (SMADIP1) (Zinc finger homeobox protein 1b)	ZEB2 KIAA0569 SIP1 ZFHX1B ZFX1B HRIHFB2411	NNIKTGSSPNSVSSS			TGSpSPNSVSSSPTNSAITQLR	1	T(1): 0.0; S(3): 0.1; S(4): 99.8; S(7): 0.1; S(9): 0.1; S(10): 0.0; S(11): 0.0; T(13): 0.0; S(15): 0.0; T(18): 0.0	229	Forward	Class I
O60315	1	Zinc finger E-box-binding homeobox 2 OS=Homo sapiens GN=ZEB2 PE=1 SV=1 - [ZEB2_HUMAN]	O60315	S705	Zinc finger E-box-binding homeobox 2 (Smad-interacting protein 1) (SMADIP1) (Zinc finger homeobox protein 1b)	ZEB2 KIAA0569 SIP1 ZFHX1B ZFX1B HRIHFB2411	YQYSNSRSPSLERSS			VYQYSNSRpSPSLER	1	Y(2): 0.0; Y(4): 0.0; S(5): 0.0; S(7): 0.0; S(9): 100.0; S(11): 0.0	228	Forward	Class I
O60315	1	Zinc finger E-box-binding homeobox 2 OS=Homo sapiens GN=ZEB2 PE=1 SV=1 - [ZEB2_HUMAN]	O60315	T782	Zinc finger E-box-binding homeobox 2 (Smad-interacting protein 1) (SMADIP1) (Zinc finger homeobox protein 1b)	ZEB2 KIAA0569 SIP1 ZFHX1B ZFX1B HRIHFB2411	LDHSRSNTPSPLNLS	CMGC/GSK	GSK3A	SNpTPpSPLNLSSTSSK	2	S(1): 0.4; T(3): 99.6; S(5): 100.0; S(10): 0.0; S(11): 0.0; T(12): 0.0; S(13): 0.0; S(14): 0.0	102	Forward	Class I
O60315	1	Zinc finger E-box-binding homeobox 2 OS=Homo sapiens GN=ZEB2 PE=1 SV=1 - [ZEB2_HUMAN]	O60315	S784	Zinc finger E-box-binding homeobox 2 (Smad-interacting protein 1) (SMADIP1) (Zinc finger homeobox protein 1b)	ZEB2 KIAA0569 SIP1 ZFHX1B ZFX1B HRIHFB2411	HSRSNTPSPLNLSST	CMGC/GSK	GSK3A	SNpTPpSPLNLSSTSSK	2	S(1): 0.4; T(3): 99.6; S(5): 100.0; S(10): 0.0; S(11): 0.0; T(12): 0.0; S(13): 0.0; S(14): 0.0	102	Forward	Class I
O60318	1	80 kDa MCM3-associated protein OS=Homo sapiens GN=MCM3AP PE=1 SV=2 - [MCM3A_HUMAN]	O60318	S527	80 kDa MCM3-associated protein (Protein GANP)	MCM3AP GANP KIAA0572 MAP80	KPGDGEVSPSTEDAP			KPGDGEVpSPSTEDAPFQHSPLGK	1	S(8): 100.0; S(10): 0.0; T(11): 0.0; S(19): 0.0	290	Forward	Class I
O60333	1	Kinesin-like protein KIF1B OS=Homo sapiens GN=KIF1B PE=1 SV=5 - [KIF1B_HUMAN]	O60333	S1054	Kinesin-like protein KIF1B (Klp)	KIF1B KIAA0591 KIAA1448	SSVAMTRSGLSLEEL			pSGLSLEELR	1	S(1): 99.5; S(4): 0.5	73	Forward	Class I
O60333	1	Kinesin-like protein KIF1B OS=Homo sapiens GN=KIF1B PE=1 SV=5 - [KIF1B_HUMAN]	O60333	S1057	Kinesin-like protein KIF1B (Klp)	KIF1B KIAA0591 KIAA1448	AMTRSGLSLEELRIV			SGLpSLEELR	1	S(1): 0.0; S(4): 100.0	152	Forward	Class I
O60333	1	Kinesin-like protein KIF1B OS=Homo sapiens GN=KIF1B PE=1 SV=5 - [KIF1B_HUMAN]	O60333	S1454	Kinesin-like protein KIF1B (Klp)	KIF1B KIAA0591 KIAA1448	CKMSDTGSPGMQRRR			MSDTGpSPGMQR	1	S(2): 0.0; T(4): 0.6; S(6): 99.4	158	Forward	Class I
O60333	1	Kinesin-like protein KIF1B OS=Homo sapiens GN=KIF1B PE=1 SV=5 - [KIF1B_HUMAN]	O60333	S1487	Kinesin-like protein KIF1B (Klp)	KIF1B KIAA0591 KIAA1448	GWRPRGDSLILEHQW			GDpSLILEHQWELEK	1	S(3): 100.0	277	Forward	Class I
O60336	1	Mitogen-activated protein kinase-binding protein 1 OS=Homo sapiens GN=MAPKBP1 PE=2 SV=3 - [MABP1_HUMAN]	O60336	S18	Mitogen-activated protein kinase-binding protein 1 (JNK-binding protein 1) (JNKBP-1)	MAPKBP1 JNKBP1 KIAA0596	RIKNLLRSPSIKLRR			NLLRpSPSIK	1	S(5): 100.0; S(7): 0.0	159	Forward	Class I
O60341	1	Lysine-specific histone demethylase 1 OS=Homo sapiens GN=AOF2 PE=1 SV=2 - [LSD1_HUMAN]	O60341	S131	Lysine-specific histone demethylase 1A (EC 1.-.-.-) (BRAF35-HDAC complex protein BHC110) (Flavin-containing amine oxidase domain-containing protein 2)	KDM1A AOF2 KDM1 KIAA0601 LSD1	DESLANLSEDEYYSE			EMDESLANLpSEDEYYpSEEERNAK	2	S(5): 13.2; S(10): 84.8; Y(14): 11.9; Y(15): 13.2; S(16): 76.9	30	Forward	Class I
O60341	1	Lysine-specific histone demethylase 1 OS=Homo sapiens GN=AOF2 PE=1 SV=2 - [LSD1_HUMAN]	O60341	S137	Lysine-specific histone demethylase 1A (EC 1.-.-.-) (BRAF35-HDAC complex protein BHC110) (Flavin-containing amine oxidase domain-containing protein 2)	KDM1A AOF2 KDM1 KIAA0601 LSD1	LSEDEYYSEEERNAK			EMDESLANLpSEDEYYpSEEERNAK	2	S(5): 13.2; S(10): 84.8; Y(14): 11.9; Y(15): 13.2; S(16): 76.9	30	Forward	Class I
O60341	1	Lysine-specific histone demethylase 1 OS=Homo sapiens GN=AOF2 PE=1 SV=2 - [LSD1_HUMAN]	O60341	T841	Lysine-specific histone demethylase 1A (EC 1.-.-.-) (BRAF35-HDAC complex protein BHC110) (Flavin-containing amine oxidase domain-containing protein 2)	KDM1A AOF2 KDM1 KIAA0601 LSD1	YTLPRQATPGVPAQQ			QApTPGVPAQQSPSM	1	T(3): 100.0; S(11): 0.0; S(13): 0.0	188	Forward	Class I
O60341	1	Lysine-specific histone demethylase 1 OS=Homo sapiens GN=AOF2 PE=1 SV=2 - [LSD1_HUMAN]	O60341	S849	Lysine-specific histone demethylase 1A (EC 1.-.-.-) (BRAF35-HDAC complex protein BHC110) (Flavin-containing amine oxidase domain-containing protein 2)	KDM1A AOF2 KDM1 KIAA0601 LSD1	PGVPAQQSPSM****	CMGC/MAPK	Erk1, Erk2	QATPGVPAQQpSPSM	1	T(3): 0.0; S(11): 100.0; S(13): 0.0	207	Forward	Class I
O60341	1	Lysine-specific histone demethylase 1 OS=Homo sapiens GN=AOF2 PE=1 SV=2 - [LSD1_HUMAN]	O60341	S851	Lysine-specific histone demethylase 1A (EC 1.-.-.-) (BRAF35-HDAC complex protein BHC110) (Flavin-containing amine oxidase domain-containing protein 2)	KDM1A AOF2 KDM1 KIAA0601 LSD1	VPAQQSPSM******	TKL/RAF	BRAF	QATPGVPAQQSPpSM	1	T(3): 0.0; S(11): 4.2; S(13): 95.8	151	Forward	Class I
O60343	1	TBC1 domain family member 4 OS=Homo sapiens GN=TBC1D4 PE=1 SV=2 - [TBCD4_HUMAN]	O60343	S44	TBC1 domain family member 4 (Akt substrate of 160 kDa) (AS160)	TBC1D4 AS160 KIAA0603	RLWYVGGSCLDHRTT			LWYVGGpSCLDHR	1	Y(3): 0.0; S(7): 100.0	137	Forward	Class I
O60343	1	TBC1 domain family member 4 OS=Homo sapiens GN=TBC1D4 PE=1 SV=2 - [TBCD4_HUMAN]	O60343	S314	TBC1 domain family member 4 (Akt substrate of 160 kDa) (AS160)	TBC1D4 AS160 KIAA0603	DEQQEFRSRCSSVTG			ILEDSGFDEQQEFRpSR	1	S(5): 0.0; S(15): 100.0	303	Forward	Class I
O60343	1	TBC1 domain family member 4 OS=Homo sapiens GN=TBC1D4 PE=1 SV=2 - [TBCD4_HUMAN]	O60343	S318	TBC1 domain family member 4 (Akt substrate of 160 kDa) (AS160)	TBC1D4 AS160 KIAA0603	EFRSRCSSVTGVQRR	AGC/SGK	SGK1	CSpSVTGVQRR	1	S(2): 0.0; S(3): 100.0; T(5): 0.0	121	Forward	Class I
O60343	1	TBC1 domain family member 4 OS=Homo sapiens GN=TBC1D4 PE=1 SV=2 - [TBCD4_HUMAN]	O60343	S341	TBC1 domain family member 4 (Akt substrate of 160 kDa) (AS160)	TBC1D4 AS160 KIAA0603	QPRRRHASAPSHVQP	AGC/SGK	SGK1	HApSAPSHVQPSDSEK	1	S(3): 100.0; S(6): 0.0; S(11): 0.0; S(13): 0.0	349	Forward	Class I
O60343	1	TBC1 domain family member 4 OS=Homo sapiens GN=TBC1D4 PE=1 SV=2 - [TBCD4_HUMAN]	O60343	S570	TBC1 domain family member 4 (Akt substrate of 160 kDa) (AS160)	TBC1D4 AS160 KIAA0603	AKRSLTSSLENIFSR	AGC/SGK	SGK1	RSLTSpSLENIFSR	1	S(2): 0.0; T(4): 0.0; S(5): 0.0; S(6): 100.0; S(12): 0.0	324	Forward	Class I
O60343	1	TBC1 domain family member 4 OS=Homo sapiens GN=TBC1D4 PE=1 SV=2 - [TBCD4_HUMAN]	O60343	S588	TBC1 domain family member 4 (Akt substrate of 160 kDa) (AS160)	TBC1D4 AS160 KIAA0603	RMRGRLGSVDSFERS	AGC/SGK	SGK1	GRLGpSVDSFER	1	S(5): 100.0; S(8): 0.0	266	Forward	Class I
O60343	1	TBC1 domain family member 4 OS=Homo sapiens GN=TBC1D4 PE=1 SV=2 - [TBCD4_HUMAN]	O60343	S591	TBC1 domain family member 4 (Akt substrate of 160 kDa) (AS160)	TBC1D4 AS160 KIAA0603	GRLGSVDSFERSNSL			GRLGSVDpSFER	1	S(5): 0.0; S(8): 100.0	269	Forward	Class I
O60343	1	TBC1 domain family member 4 OS=Homo sapiens GN=TBC1D4 PE=1 SV=2 - [TBCD4_HUMAN]	O60343	T642	TBC1 domain family member 4 (Akt substrate of 160 kDa) (AS160)	TBC1D4 AS160 KIAA0603	QFRRRAHTFSHPPSS	AGC/AKT	AKT1, AKT2	AHpTFSHPPSSTK	1	T(3): 100.0; S(5): 0.0; S(9): 0.0; S(10): 0.0; T(11): 0.0	211	Forward	Class I
O60343	1	TBC1 domain family member 4 OS=Homo sapiens GN=TBC1D4 PE=1 SV=2 - [TBCD4_HUMAN]	O60343	S666	TBC1 domain family member 4 (Akt substrate of 160 kDa) (AS160)	TBC1D4 AS160 KIAA0603	GRAQGVRSPLLRQSS	Atypical/PIKK/FRAP	FRAP	AQGVRpSPLLR	1	S(6): 100.0	216	Forward	Class I
O60343	1	TBC1 domain family member 4 OS=Homo sapiens GN=TBC1D4 PE=1 SV=2 - [TBCD4_HUMAN]	O60343	S751	TBC1 domain family member 4 (Akt substrate of 160 kDa) (AS160)	TBC1D4 AS160 KIAA0603	EGRKRTSSTCSNESL	AGC/SGK	SGK1	TSpSTCpSNESLSVGGTSVTPR	2	T(1): 0.3; S(2): 0.3; S(3): 99.0; T(4): 0.3; S(6): 100.0; S(9): 0.0; S(11): 0.0; T(15): 0.0; S(16): 0.0; T(18): 0.0	330	Forward	Class I
O60343	1	TBC1 domain family member 4 OS=Homo sapiens GN=TBC1D4 PE=1 SV=2 - [TBCD4_HUMAN]	O60343	S754	TBC1 domain family member 4 (Akt substrate of 160 kDa) (AS160)	TBC1D4 AS160 KIAA0603	KRTSSTCSNESLSVG	AGC/SGK	SGK1	TSpSTCpSNESLSVGGTSVTPR	2	T(1): 0.3; S(2): 0.3; S(3): 99.0; T(4): 0.3; S(6): 100.0; S(9): 0.0; S(11): 0.0; T(15): 0.0; S(16): 0.0; T(18): 0.0	330	Forward	Class I
O60343	1	TBC1 domain family member 4 OS=Homo sapiens GN=TBC1D4 PE=1 SV=2 - [TBCD4_HUMAN]	O60343	S757	TBC1 domain family member 4 (Akt substrate of 160 kDa) (AS160)	TBC1D4 AS160 KIAA0603	SSTCSNESLSVGGTS	AGC/PKB	PDK1	TSSTCpSNEpSLSVGGTSVTPR	2	T(1): 0.0; S(2): 0.0; S(3): 0.0; T(4): 0.7; S(6): 99.6; S(9): 99.6; S(11): 0.0; T(15): 0.0; S(16): 0.0; T(18): 0.0	221	Forward	Class I
O60381	1	HMG box-containing protein 1 OS=Homo sapiens GN=HBP1 PE=1 SV=2 - [HBP1_HUMAN]	O60381	S380	HMG box-containing protein 1 (HMG box transcription factor 1) (High mobility group box transcription factor 1)	HBP1	MARQRRASLSCGGPG			RApSLSCGGPGGQDFAR	1	S(3): 100.0; S(5): 0.0	369	Forward	Class I
O60487	1	Myelin protein zero-like protein 2 OS=Homo sapiens GN=MPZL2 PE=2 SV=1 - [MPZL2_HUMAN]	O60487	T214	Myelin protein zero-like protein 2 (Epithelial V-like antigen 1)	MPZL2 EVA EVA1 UNQ606/PRO1192	VSVYLEDTD******			KVSVYLEDpTD	1	S(3): 0.0; Y(5): 0.0; T(9): 100.0	117	Forward	Class I
O60502	1	Bifunctional protein NCOAT OS=Homo sapiens GN=MGEA5 PE=1 SV=2 - [NCOAT_HUMAN]	O60502	S364	Bifunctional protein NCOAT (Meningioma-expressed antigen 5) (Nuclear cytoplasmic O-GlcNAcase and acetyltransferase) [Includes: Protein O-GlcNAcase (EC 3.2.1.169) (Glycoside hydrolase O-GlcNAcase) (Hexosaminidase C) (N-acetyl-beta-D-glucosaminidase) (N-acetyl-beta-glucosaminidase) (O-GlcNAcase) (OGA); Histone acetyltransferase (HAT) (EC 2.3.1.48)]	MGEA5 HEXC KIAA0679 MEA5	IKLENEGSDEDIETD			LENEGpSDEDIETDVLYSPQMALK	1	S(6): 100.0; T(12): 0.0; Y(16): 0.0; S(17): 0.0	292	Forward	Class I
O60504	1	Vinexin OS=Homo sapiens GN=SORBS3 PE=1 SV=1 - [VINEX_HUMAN]	O60504	S373	Vinexin (SH3-containing adapter molecule 1) (SCAM-1) (Sorbin and SH3 domain-containing protein 3)	SORBS3 SCAM1	SASNGGGSPARREEK			DPSASNGGGpSPARREEK	1	S(3): 0.0; S(5): 0.0; S(10): 100.0	217	Forward	Class I
O60504	1	Vinexin OS=Homo sapiens GN=SORBS3 PE=1 SV=1 - [VINEX_HUMAN]	O60504	S395	Vinexin (SH3-containing adapter molecule 1) (SCAM-1) (Sorbin and SH3 domain-containing protein 3)	SORBS3 SCAM1	KFDFQAQSPKELTLQ	CMGC/MAPK	Erk1, Erk2	FDFQAQpSPK	1	S(7): 100.0	104	Forward	Class I
O60504	1	Vinexin OS=Homo sapiens GN=SORBS3 PE=1 SV=1 - [VINEX_HUMAN]	O60504	S530	Vinexin (SH3-containing adapter molecule 1) (SCAM-1) (Sorbin and SH3 domain-containing protein 3)	SORBS3 SCAM1	DGPQLPTSPRLTAAA	CMGC/MAPK	Erk1, Erk2	LRLCDDGPQLPTpSPR	1	T(12): 0.0; S(13): 100.0	266	Forward	Class I
O60504	1	Vinexin OS=Homo sapiens GN=SORBS3 PE=1 SV=1 - [VINEX_HUMAN]	O60504	S539	Vinexin (SH3-containing adapter molecule 1) (SCAM-1) (Sorbin and SH3 domain-containing protein 3)	SORBS3 SCAM1	RLTAAARSARHPSSP			pSARHPSSPSALR	1	S(1): 98.1; S(6): 0.9; S(7): 0.9; S(9): 0.0	49	Forward	Class I
O60504	1	Vinexin OS=Homo sapiens GN=SORBS3 PE=1 SV=1 - [VINEX_HUMAN]	O60504	S544	Vinexin (SH3-containing adapter molecule 1) (SCAM-1) (Sorbin and SH3 domain-containing protein 3)	SORBS3 SCAM1	ARSARHPSSPSALRS	CAMK/CAMK2	CaMK2d, CaMK2g	HPpSSPSALR	1	S(3): 98.9; S(4): 1.1; S(6): 0.0	74	Forward	Class I
O60504	1	Vinexin OS=Homo sapiens GN=SORBS3 PE=1 SV=1 - [VINEX_HUMAN]	O60504	T556	Vinexin (SH3-containing adapter molecule 1) (SCAM-1) (Sorbin and SH3 domain-containing protein 3)	SORBS3 SCAM1	LRSPADPTDLGGQTS			SPADPpTDLGGQTSPR	1	S(1): 0.0; T(6): 99.0; T(12): 0.5; S(13): 0.5	77	Forward	Class I
O60504	1	Vinexin OS=Homo sapiens GN=SORBS3 PE=1 SV=1 - [VINEX_HUMAN]	O60504	S563	Vinexin (SH3-containing adapter molecule 1) (SCAM-1) (Sorbin and SH3 domain-containing protein 3)	SORBS3 SCAM1	TDLGGQTSPRRTGFS	CMGC/MAPK	Erk1, Erk2	SPADPTDLGGQTpSPR	1	S(1): 0.0; T(6): 0.0; T(12): 0.0; S(13): 100.0	242	Forward	Class I
O60506	1	Heterogeneous nuclear ribonucleoprotein Q OS=Homo sapiens GN=SYNCRIP PE=1 SV=2 - [HNRPQ_HUMAN]	O60506	T348	Heterogeneous nuclear ribonucleoprotein Q (hnRNP Q) (Glycine- and tyrosine-rich RNA-binding protein) (GRY-RBP) (NS1-associated protein 1) (Synaptotagmin-binding, cytoplasmic RNA-interacting protein)	SYNCRIP HNRPQ NSAP1	FVRNLANTVTEEILE			NLANpTVpTEEILEK	2	T(5): 100.0; T(7): 100.0	137	Forward	Class I
O60506	1	Heterogeneous nuclear ribonucleoprotein Q OS=Homo sapiens GN=SYNCRIP PE=1 SV=2 - [HNRPQ_HUMAN]	O60506	T350	Heterogeneous nuclear ribonucleoprotein Q (hnRNP Q) (Glycine- and tyrosine-rich RNA-binding protein) (GRY-RBP) (NS1-associated protein 1) (Synaptotagmin-binding, cytoplasmic RNA-interacting protein)	SYNCRIP HNRPQ NSAP1	RNLANTVTEEILEKA			NLANpTVpTEEILEK	2	T(5): 100.0; T(7): 100.0	137	Forward	Class I
O60522	1	Tudor domain-containing protein 6 OS=Homo sapiens GN=TDRD6 PE=2 SV=2 - [TDRD6_HUMAN]	O60522	S1262	Tudor domain-containing protein 6 (Antigen NY-CO-45) (Cancer/testis antigen 41.2) (CT41.2)	TDRD6	TEKKEEISAETPLKT			EEIpSAEpTPLKTAR	2	S(4): 100.0; T(7): 100.0; T(11): 0.0	144	Forward	Class I
O60522	1	Tudor domain-containing protein 6 OS=Homo sapiens GN=TDRD6 PE=2 SV=2 - [TDRD6_HUMAN]	O60522	T1265	Tudor domain-containing protein 6 (Antigen NY-CO-45) (Cancer/testis antigen 41.2) (CT41.2)	TDRD6	KEEISAETPLKTARV			EEIpSAEpTPLKTAR	2	S(4): 100.0; T(7): 100.0; T(11): 0.0	144	Forward	Class I
O60524	1	Serologically defined colon cancer antigen 1 OS=Homo sapiens GN=SDCCAG1 PE=1 SV=3 - [SDCG1_HUMAN]	O60524	S417	Nuclear export mediator factor NEMF (Antigen NY-CO-1) (Serologically defined colon cancer antigen 1)	NEMF SDCCAG1	LRNPYLLSEEEDDDV			NPYLLpSEEEDDDVDGDVNVEK	1	Y(3): 0.0; S(6): 100.0	331	Forward	Class I
O60524	1	Serologically defined colon cancer antigen 1 OS=Homo sapiens GN=SDCCAG1 PE=1 SV=3 - [SDCG1_HUMAN]	O60524	S831	Nuclear export mediator factor NEMF (Antigen NY-CO-1) (Serologically defined colon cancer antigen 1)	NEMF SDCCAG1	MKKKKLPSDSGDLEA			KLPpSDSGDLEALEGK	1	S(4): 100.0; S(6): 0.0	307	Forward	Class I
O60551	1	Glycylpeptide N-tetradecanoyltransferase 2 OS=Homo sapiens GN=NMT2 PE=2 SV=1 - [NMT2_HUMAN]	O60551	S38	Glycylpeptide N-tetradecanoyltransferase 2 (EC 2.3.1.97) (Myristoyl-CoA:protein N-myristoyltransferase 2) (NMT 2) (Peptide N-myristoyltransferase 2) (Type II N-myristoyltransferase)	NMT2	ETEHAKGSPGGYLGA			GpSPGGYLGAK	1	S(2): 100.0; Y(6): 0.0	172	Forward	Class I
O60551	1	Glycylpeptide N-tetradecanoyltransferase 2 OS=Homo sapiens GN=NMT2 PE=2 SV=1 - [NMT2_HUMAN]	O60551	S66	Glycylpeptide N-tetradecanoyltransferase 2 (EC 2.3.1.97) (Myristoyl-CoA:protein N-myristoyltransferase 2) (NMT 2) (Peptide N-myristoyltransferase 2) (Type II N-myristoyltransferase)	NMT2	PNSGGTKSDSASDSQ			EKPNSGGTKpSDSASDSQEIK	1	S(5): 1.2; T(8): 1.2; S(10): 97.7; S(12): 0.0; S(14): 0.0; S(16): 0.0	110	Forward	Class I
O60573	1	Eukaryotic translation initiation factor 4E type 2 OS=Homo sapiens GN=EIF4E2 PE=1 SV=1 - [IF4E2_HUMAN]	O60573	S13	Eukaryotic translation initiation factor 4E type 2 (eIF-4E type 2) (eIF4E type 2) (Eukaryotic translation initiation factor 4E homologous protein) (Eukaryotic translation initiation factor 4E-like 3) (eIF4E-like protein 4E-LP) (mRNA cap-binding protein 4EHP) (mRNA cap-binding protein type 3)	EIF4E2 EIF4EL3	DALKDDDSGDHDQNE			FDALKDDDpSGDHDQNEENSTQK	1	S(9): 100.0; S(19): 0.0; T(20): 0.0	214	Forward	Class I
O60583	1	Cyclin-T2 OS=Homo sapiens GN=CCNT2 PE=1 SV=2 - [CCNT2_HUMAN]	O60583	T425	Cyclin-T2 (CycT2)	CCNT2	KHHGPISTTPGIIPQ			HHGPISpTTPGIIPQK	1	S(6): 0.7; T(7): 91.4; T(8): 7.8	133	Forward	Class I
O60583	1	Cyclin-T2 OS=Homo sapiens GN=CCNT2 PE=1 SV=2 - [CCNT2_HUMAN]	O60583	T426	Cyclin-T2 (CycT2)	CCNT2	HHGPISTTPGIIPQK			HHGPISTpTPGIIPQK	1	S(6): 0.0; T(7): 0.1; T(8): 99.9	296	Forward	Class I
O60583	1	Cyclin-T2 OS=Homo sapiens GN=CCNT2 PE=1 SV=2 - [CCNT2_HUMAN]	O60583	S480	Cyclin-T2 (CycT2)	CCNT2	ASSSSVTSPIKMKIP	CMGC/CDK/CDC2	CDC2, CDK2, CDK3	QGQSQAASSSSVTpSPIK	1	S(4): 0.0; S(8): 0.0; S(9): 0.0; S(10): 0.0; S(11): 0.0; T(13): 0.0; S(14): 100.0	377	Forward	Class I
O60645	1	Exocyst complex component 3 OS=Homo sapiens GN=EXOC3 PE=1 SV=2 - [EXOC3_HUMAN]	O60645	S627	Exocyst complex component 3 (Exocyst complex component Sec6)	EXOC3 SEC6 SEC6L1	AVMQKRISFRSPEER			IpSFRSPEERK	1	S(2): 90.9; S(5): 9.1	74	Forward	Class I
O60673	1	DNA polymerase zeta catalytic subunit OS=Homo sapiens GN=REV3L PE=1 SV=2 - [DPOLZ_HUMAN]	O60673	S1075	DNA polymerase zeta catalytic subunit (EC 2.7.7.7) (Protein reversionless 3-like) (REV3-like) (hREV3)	REV3L POLZ REV3	ENIKRTLSFRKKRSH	CAMK/RAD53	CHK2	RTLpSFRK	1	T(2): 0.0; S(4): 100.0	159	Forward	Class I
O60673	1	DNA polymerase zeta catalytic subunit OS=Homo sapiens GN=REV3L PE=1 SV=2 - [DPOLZ_HUMAN]	O60673	S1114	DNA polymerase zeta catalytic subunit (EC 2.7.7.7) (Protein reversionless 3-like) (REV3-like) (hREV3)	REV3L POLZ REV3	MSKLGFLSERSTSPI			LGFLpSER	1	S(5): 100.0	52	Forward	Class I
O60673	1	DNA polymerase zeta catalytic subunit OS=Homo sapiens GN=REV3L PE=1 SV=2 - [DPOLZ_HUMAN]	O60673	T1224	DNA polymerase zeta catalytic subunit (EC 2.7.7.7) (Protein reversionless 3-like) (REV3-like) (hREV3)	REV3L POLZ REV3	KGTSRKHTTLKDEKI			KHpTpTLK	2	T(3): 100.0; T(4): 100.0	76	Forward	Class I
O60673	1	DNA polymerase zeta catalytic subunit OS=Homo sapiens GN=REV3L PE=1 SV=2 - [DPOLZ_HUMAN]	O60673	T1225	DNA polymerase zeta catalytic subunit (EC 2.7.7.7) (Protein reversionless 3-like) (REV3-like) (hREV3)	REV3L POLZ REV3	GTSRKHTTLKDEKIK			KHpTpTLK	2	T(3): 100.0; T(4): 100.0	76	Forward	Class I
O60673	1	DNA polymerase zeta catalytic subunit OS=Homo sapiens GN=REV3L PE=1 SV=2 - [DPOLZ_HUMAN]	O60673	S1724	DNA polymerase zeta catalytic subunit (EC 2.7.7.7) (Protein reversionless 3-like) (REV3-like) (hREV3)	REV3L POLZ REV3	WIRSGTLSPEIFEKS			SGTLpSPEIFEK	1	S(1): 0.0; T(3): 0.0; S(5): 100.0	156	Forward	Class I
O60673	1	DNA polymerase zeta catalytic subunit OS=Homo sapiens GN=REV3L PE=1 SV=2 - [DPOLZ_HUMAN]	O60673	S1855	DNA polymerase zeta catalytic subunit (EC 2.7.7.7) (Protein reversionless 3-like) (REV3-like) (hREV3)	REV3L POLZ REV3	LTPTPDSSPRSTSSP			NNDMLTPTPDSpSPR	1	T(6): 0.0; T(8): 0.1; S(11): 1.9; S(12): 97.9	40	Forward	Class I
O60701	1	UDP-glucose 6-dehydrogenase OS=Homo sapiens GN=UGDH PE=1 SV=1 - [UGDH_HUMAN]	O60701	S130	UDP-glucose 6-dehydrogenase (UDP-Glc dehydrogenase) (UDP-GlcDH) (UDPGDH) (EC 1.1.1.22)	UGDH	YKIVTEKSTVPVRAA			IVTEKpSpTVPVR	2	T(3): 0.0; S(6): 100.0; T(7): 100.0	158	Forward	Class I
O60701	1	UDP-glucose 6-dehydrogenase OS=Homo sapiens GN=UGDH PE=1 SV=1 - [UGDH_HUMAN]	O60701	T131	UDP-glucose 6-dehydrogenase (UDP-Glc dehydrogenase) (UDP-GlcDH) (UDPGDH) (EC 1.1.1.22)	UGDH	KIVTEKSTVPVRAAE			IVTEKpSpTVPVR	2	T(3): 0.0; S(6): 100.0; T(7): 100.0	158	Forward	Class I
O60701	1	UDP-glucose 6-dehydrogenase OS=Homo sapiens GN=UGDH PE=1 SV=1 - [UGDH_HUMAN]	O60701	S476	UDP-glucose 6-dehydrogenase (UDP-Glc dehydrogenase) (UDP-GlcDH) (UDPGDH) (EC 1.1.1.22)	UGDH	KRIPYAPSGEIPKFS			RIPYAPpSGEIPK	1	Y(4): 0.0; S(7): 100.0	145	Forward	Class I
O60716	1	Catenin delta-1 OS=Homo sapiens GN=CTNND1 PE=1 SV=1 - [CTND1_HUMAN]	O60716	S47	Catenin delta-1 (Cadherin-associated Src substrate) (CAS) (p120 catenin) (p120(ctn)) (p120(cas))	CTNND1 KIAA0384	QLERVRVSPQDANPL	CMGC/CDK/CDC2	CDK2	VRVpSPQDANPLMANGTLTR	1	S(4): 100.0; T(16): 0.0; T(18): 0.0	259	Forward	Class I
O60716	1	Catenin delta-1 OS=Homo sapiens GN=CTNND1 PE=1 SV=1 - [CTND1_HUMAN]	O60716	T59	Catenin delta-1 (Cadherin-associated Src substrate) (CAS) (p120 catenin) (p120(ctn)) (p120(cas))	CTNND1 KIAA0384	NPLMANGTLTRRHQN			VSPQDANPLMANGpTLTRR	1	S(2): 0.0; T(14): 100.0; T(16): 0.0	359	Forward	Class I
O60716	1	Catenin delta-1 OS=Homo sapiens GN=CTNND1 PE=1 SV=1 - [CTND1_HUMAN]	O60716	Y96	Catenin delta-1 (Cadherin-associated Src substrate) (CAS) (p120 catenin) (p120(ctn)) (p120(cas))	CTNND1 KIAA0384	QDHSHLLYSTIPRMQ	TK/Fak	FAK, PYK2	LNGPQDHSHLLpYSTIPR	1	S(8): 0.0; Y(12): 98.2; S(13): 0.9; T(14): 0.9	266	Forward	Class I
O60716	1	Catenin delta-1 OS=Homo sapiens GN=CTNND1 PE=1 SV=1 - [CTND1_HUMAN]	O60716	S97	Catenin delta-1 (Cadherin-associated Src substrate) (CAS) (p120 catenin) (p120(ctn)) (p120(cas))	CTNND1 KIAA0384	DHSHLLYSTIPRMQE			LNGPQDHSHLLYpSTIPR	1	S(8): 0.0; Y(12): 0.8; S(13): 98.5; T(14): 0.8	234	Forward	Class I
O60716	1	Catenin delta-1 OS=Homo sapiens GN=CTNND1 PE=1 SV=1 - [CTND1_HUMAN]	O60716	T98	Catenin delta-1 (Cadherin-associated Src substrate) (CAS) (p120 catenin) (p120(ctn)) (p120(cas))	CTNND1 KIAA0384	HSHLLYSTIPRMQEP			LNGPQDHSHLLYSpTIPR	1	S(8): 0.0; Y(12): 0.0; S(13): 0.0; T(14): 100.0	311	Forward	Class I
O60716	1	Catenin delta-1 OS=Homo sapiens GN=CTNND1 PE=1 SV=1 - [CTND1_HUMAN]	O60716	T199	Catenin delta-1 (Cadherin-associated Src substrate) (CAS) (p120 catenin) (p120(ctn)) (p120(cas))	CTNND1 KIAA0384	PYVGQAGTATLPRNF			NGNGGPGPYVGQAGpTATLPR	1	Y(9): 1.1; T(15): 97.9; T(17): 1.1	185	Forward	Class I
O60716	1	Catenin delta-1 OS=Homo sapiens GN=CTNND1 PE=1 SV=1 - [CTND1_HUMAN]	O60716	T201	Catenin delta-1 (Cadherin-associated Src substrate) (CAS) (p120 catenin) (p120(ctn)) (p120(cas))	CTNND1 KIAA0384	VGQAGTATLPRNFHY			NGNGGPGPYVGQAGTApTLPR	1	Y(9): 0.0; T(15): 0.0; T(17): 100.0	308	Forward	Class I
O60716	1	Catenin delta-1 OS=Homo sapiens GN=CTNND1 PE=1 SV=1 - [CTND1_HUMAN]	O60716	S225	Catenin delta-1 (Cadherin-associated Src substrate) (CAS) (p120 catenin) (p120(ctn)) (p120(cas))	CTNND1 KIAA0384	EDGYPGGSDNYGSLS			HYEDGYPGGpSDNYGSLSR	1	Y(2): 0.0; Y(6): 0.0; S(10): 100.0; Y(13): 0.0; S(15): 0.0; S(17): 0.0	235	Forward	Class I
O60716	1	Catenin delta-1 OS=Homo sapiens GN=CTNND1 PE=1 SV=1 - [CTND1_HUMAN]	O60716	Y228	Catenin delta-1 (Cadherin-associated Src substrate) (CAS) (p120 catenin) (p120(ctn)) (p120(cas))	CTNND1 KIAA0384	YPGGSDNYGSLSRVT	TK/EGFR	EGFR, ErbB2	HYEDGYPGGSDNpYGSLSR	1	Y(2): 0.0; Y(6): 0.0; S(10): 0.0; Y(13): 99.6; S(15): 0.4; S(17): 0.0	263	Forward	Class I
O60716	1	Catenin delta-1 OS=Homo sapiens GN=CTNND1 PE=1 SV=1 - [CTND1_HUMAN]	O60716	S230	Catenin delta-1 (Cadherin-associated Src substrate) (CAS) (p120 catenin) (p120(ctn)) (p120(cas))	CTNND1 KIAA0384	GGSDNYGSLSRVTRI	AGC/DMPK/ROCK	ROCK1, ROCK2	HYEDGYPGGSDNYGpSLSR	1	Y(2): 0.0; Y(6): 0.0; S(10): 0.0; Y(13): 0.0; S(15): 100.0; S(17): 0.0	395	Forward	Class I
O60716	1	Catenin delta-1 OS=Homo sapiens GN=CTNND1 PE=1 SV=1 - [CTND1_HUMAN]	O60716	S252	Catenin delta-1 (Cadherin-associated Src substrate) (CAS) (p120 catenin) (p120(ctn)) (p120(cas))	CTNND1 KIAA0384	MEGYRAPSRQDVYGP			APpSRQDVYGPQPQVR	1	S(3): 100.0; Y(8): 0.0	277	Forward	Class I
O60716	1	Catenin delta-1 OS=Homo sapiens GN=CTNND1 PE=1 SV=1 - [CTND1_HUMAN]	O60716	S268	Catenin delta-1 (Cadherin-associated Src substrate) (CAS) (p120 catenin) (p120(ctn)) (p120(cas))	CTNND1 KIAA0384	PQVRVGGSSVDLHRF			VGGpSSVDLHR	1	S(4): 100.0; S(5): 0.0	281	Forward	Class I
O60716	1	Catenin delta-1 OS=Homo sapiens GN=CTNND1 PE=1 SV=1 - [CTND1_HUMAN]	O60716	S269	Catenin delta-1 (Cadherin-associated Src substrate) (CAS) (p120 catenin) (p120(ctn)) (p120(cas))	CTNND1 KIAA0384	QVRVGGSSVDLHRFH	TKL/STKR	TGFbR2	VGGpSpSVDLHR	2	S(4): 100.0; S(5): 100.0	273	Forward	Class I
O60716	1	Catenin delta-1 OS=Homo sapiens GN=CTNND1 PE=1 SV=1 - [CTND1_HUMAN]	O60716	S288	Catenin delta-1 (Cadherin-associated Src substrate) (CAS) (p120 catenin) (p120(ctn)) (p120(cas))	CTNND1 KIAA0384	GLEDDQRSMGYDDLD			pSMGYDDLDYGMMSDYGTAR	1	S(1): 99.5; Y(4): 0.5; Y(9): 0.0; S(13): 0.0; Y(15): 0.0; T(17): 0.0	238	Forward	Class I
O60716	1	Catenin delta-1 OS=Homo sapiens GN=CTNND1 PE=1 SV=1 - [CTND1_HUMAN]	O60716	Y291	Catenin delta-1 (Cadherin-associated Src substrate) (CAS) (p120 catenin) (p120(ctn)) (p120(cas))	CTNND1 KIAA0384	DDQRSMGYDDLDYGM	TK/InsR	IGF1R	SMGpYDDLDYGMMSDYGTAR	1	S(1): 0.6; Y(4): 99.4; Y(9): 0.0; S(13): 0.0; Y(15): 0.0; T(17): 0.0	174	Forward	Class I
O60716	1	Catenin delta-1 OS=Homo sapiens GN=CTNND1 PE=1 SV=1 - [CTND1_HUMAN]	O60716	Y296	Catenin delta-1 (Cadherin-associated Src substrate) (CAS) (p120 catenin) (p120(ctn)) (p120(cas))	CTNND1 KIAA0384	MGYDDLDYGMMSDYG	TK/Fak	FAK, PYK2	SMGYDDLDpYGMMSDYGTAR	1	S(1): 1.3; Y(4): 1.3; Y(9): 96.1; S(13): 1.3; Y(15): 0.0; T(17): 0.0	74	Forward	Class I
O60716	1	Catenin delta-1 OS=Homo sapiens GN=CTNND1 PE=1 SV=1 - [CTND1_HUMAN]	O60716	S346	Catenin delta-1 (Cadherin-associated Src substrate) (CAS) (p120 catenin) (p120(ctn)) (p120(cas))	CTNND1 KIAA0384	LAQHERGSLASLDSL	AGC	PKN1, PKN2	GpSLApSLDSLRK	2	S(2): 98.3; S(5): 100.0; S(8): 1.7	54	Forward	Class I
O60716	1	Catenin delta-1 OS=Homo sapiens GN=CTNND1 PE=1 SV=1 - [CTND1_HUMAN]	O60716	S349	Catenin delta-1 (Cadherin-associated Src substrate) (CAS) (p120 catenin) (p120(ctn)) (p120(cas))	CTNND1 KIAA0384	HERGSLASLDSLRKG	TKL/STKR	TGFbR2	GSLApSLDpSLRK	2	S(2): 0.0; S(5): 100.0; S(8): 100.0	333	Forward	Class I
O60716	1	Catenin delta-1 OS=Homo sapiens GN=CTNND1 PE=1 SV=1 - [CTND1_HUMAN]	O60716	S352	Catenin delta-1 (Cadherin-associated Src substrate) (CAS) (p120 catenin) (p120(ctn)) (p120(cas))	CTNND1 KIAA0384	GSLASLDSLRKGGPP			GSLApSLDpSLRK	2	S(2): 0.0; S(5): 100.0; S(8): 100.0	333	Forward	Class I
O60716	1	Catenin delta-1 OS=Homo sapiens GN=CTNND1 PE=1 SV=1 - [CTND1_HUMAN]	O60716	T611	Catenin delta-1 (Cadherin-associated Src substrate) (CAS) (p120 catenin) (p120(ctn)) (p120(cas))	CTNND1 KIAA0384	APNVANNTGPHAASC			YQEAAPNVANNpTGPHAASCFGAK	1	Y(1): 0.0; T(12): 100.0; S(18): 0.0	229	Forward	Class I
O60716	1	Catenin delta-1 OS=Homo sapiens GN=CTNND1 PE=1 SV=1 - [CTND1_HUMAN]	O60716	T643	Catenin delta-1 (Cadherin-associated Src substrate) (CAS) (p120 catenin) (p120(ctn)) (p120(cas))	CTNND1 KIAA0384	IEDPANDTVDFPKRT			GKKPIEDPANDpTVDFPK	1	T(12): 100.0	273	Forward	Class I
O60716	1	Catenin delta-1 OS=Homo sapiens GN=CTNND1 PE=1 SV=1 - [CTND1_HUMAN]	O60716	S713	Catenin delta-1 (Cadherin-associated Src substrate) (CAS) (p120 catenin) (p120(ctn)) (p120(cas))	CTNND1 KIAA0384	LRQEKALSAIADLLT			ALpSAIADLLTNEHER	1	S(3): 100.0; T(10): 0.0	131	Forward	Class I
O60716	1	Catenin delta-1 OS=Homo sapiens GN=CTNND1 PE=1 SV=1 - [CTND1_HUMAN]	O60716	S847	Catenin delta-1 (Cadherin-associated Src substrate) (CAS) (p120 catenin) (p120(ctn)) (p120(cas))	CTNND1 KIAA0384	EKEGWKKSDFQVNLN			EGWKKpSDFQVNLNNASR	1	S(6): 100.0; S(16): 0.0	367	Forward	Class I
O60716	1	Catenin delta-1 OS=Homo sapiens GN=CTNND1 PE=1 SV=1 - [CTND1_HUMAN]	O60716	S857	Catenin delta-1 (Cadherin-associated Src substrate) (CAS) (p120 catenin) (p120(ctn)) (p120(cas))	CTNND1 KIAA0384	QVNLNNASRSQSSHS	CMGC/GSK	GSK3A	SDFQVNLNNApSR	1	S(1): 0.0; S(11): 100.0	106	Forward	Class I
O60716	1	Catenin delta-1 OS=Homo sapiens GN=CTNND1 PE=1 SV=1 - [CTND1_HUMAN]	O60716	S861	Catenin delta-1 (Cadherin-associated Src substrate) (CAS) (p120 catenin) (p120(ctn)) (p120(cas))	CTNND1 KIAA0384	NNASRSQSSHSYDDS	TKL/STKR	TGFbR2	SQpSSHpSYDDSTLPLIDR	2	S(1): 0.0; S(3): 100.0; S(4): 0.0; S(6): 100.0; Y(7): 0.0; S(10): 0.0; T(11): 0.0	347	Forward	Class I
O60716	1	Catenin delta-1 OS=Homo sapiens GN=CTNND1 PE=1 SV=1 - [CTND1_HUMAN]	O60716	S862	Catenin delta-1 (Cadherin-associated Src substrate) (CAS) (p120 catenin) (p120(ctn)) (p120(cas))	CTNND1 KIAA0384	NASRSQSSHSYDDST	CK1	CK1d, CK1e	SQSpSHSYDDSTLPLIDR	1	S(1): 0.0; S(3): 0.3; S(4): 99.7; S(6): 0.0; Y(7): 0.0; S(10): 0.0; T(11): 0.0	267	Forward	Class I
O60716	1	Catenin delta-1 OS=Homo sapiens GN=CTNND1 PE=1 SV=1 - [CTND1_HUMAN]	O60716	S864	Catenin delta-1 (Cadherin-associated Src substrate) (CAS) (p120 catenin) (p120(ctn)) (p120(cas))	CTNND1 KIAA0384	SRSQSSHSYDDSTLP	TKL/STKR	TGFbR2	SQSSHpSYDDSTLPLIDR	1	S(1): 0.0; S(3): 0.0; S(4): 0.0; S(6): 100.0; Y(7): 0.0; S(10): 0.0; T(11): 0.0	419	Forward	Class I
O60716	1	Catenin delta-1 OS=Homo sapiens GN=CTNND1 PE=1 SV=1 - [CTND1_HUMAN]	O60716	S868	Catenin delta-1 (Cadherin-associated Src substrate) (CAS) (p120 catenin) (p120(ctn)) (p120(cas))	CTNND1 KIAA0384	SSHSYDDSTLPLIDR			SQSSHSYDDpSTLPLIDR	1	S(1): 0.0; S(3): 0.1; S(4): 0.1; S(6): 0.0; Y(7): 0.0; S(10): 92.9; T(11): 6.9	86	Forward	Class I
O60716	1	Catenin delta-1 OS=Homo sapiens GN=CTNND1 PE=1 SV=1 - [CTND1_HUMAN]	O60716	T869	Catenin delta-1 (Cadherin-associated Src substrate) (CAS) (p120 catenin) (p120(ctn)) (p120(cas))	CTNND1 KIAA0384	SHSYDDSTLPLIDRN			SQSSHSYDDSpTLPLIDR	1	S(1): 0.0; S(3): 0.0; S(4): 0.0; S(6): 0.0; Y(7): 0.0; S(10): 0.0; T(11): 100.0	393	Forward	Class I
O60716	1	Catenin delta-1 OS=Homo sapiens GN=CTNND1 PE=1 SV=1 - [CTND1_HUMAN]	O60716	S899	Catenin delta-1 (Cadherin-associated Src substrate) (CAS) (p120 catenin) (p120(ctn)) (p120(cas))	CTNND1 KIAA0384	NMGSNTKSLDNNYST			pSLDNNYSTPNER	1	S(1): 100.0; Y(6): 0.0; S(7): 0.0; T(8): 0.0	170	Forward	Class I
O60716	1	Catenin delta-1 OS=Homo sapiens GN=CTNND1 PE=1 SV=1 - [CTND1_HUMAN]	O60716	T906	Catenin delta-1 (Cadherin-associated Src substrate) (CAS) (p120 catenin) (p120(ctn)) (p120(cas))	CTNND1 KIAA0384	SLDNNYSTPNERGDH	CMGC/CDK/CDC2	CDK2	SLDNNYSpTPNERGDHNR	1	S(1): 0.0; Y(6): 0.0; S(7): 0.0; T(8): 100.0	272	Forward	Class I
O60716	1	Catenin delta-1 OS=Homo sapiens GN=CTNND1 PE=1 SV=1 - [CTND1_HUMAN]	O60716	T916	Catenin delta-1 (Cadherin-associated Src substrate) (CAS) (p120 catenin) (p120(ctn)) (p120(cas))	CTNND1 KIAA0384	ERGDHNRTLDRSGDL			pTLDRSGDLGDMEPLK	1	T(1): 100.0; S(5): 0.0	284	Forward	Class I
O60716	1	Catenin delta-1 OS=Homo sapiens GN=CTNND1 PE=1 SV=1 - [CTND1_HUMAN]	O60716	S920	Catenin delta-1 (Cadherin-associated Src substrate) (CAS) (p120 catenin) (p120(ctn)) (p120(cas))	CTNND1 KIAA0384	HNRTLDRSGDLGDME	TKL/STKR	TGFbR2	TLDRpSGDLGDMEPLK	1	T(1): 0.0; S(5): 100.0	426	Forward	Class I
O60749	1	Sorting nexin-2 OS=Homo sapiens GN=SNX2 PE=1 SV=2 - [SNX2_HUMAN]	O60749	S117	Sorting nexin-2 (Transformation-related gene 9 protein) (TRG-9)	SNX2 TRG9	APRIESKSMSAPVIF	TKL/STKR	ACTR2B, ALK4, TGFbR1, TGFbR2	pSMSAPVIFDR	1	S(1): 99.5; S(3): 0.5	38	Forward	Class I
O60749	1	Sorting nexin-2 OS=Homo sapiens GN=SNX2 PE=1 SV=2 - [SNX2_HUMAN]	O60749	S119	Sorting nexin-2 (Transformation-related gene 9 protein) (TRG-9)	SNX2 TRG9	RIESKSMSAPVIFDR	TKL/STKR	ACTR2B, ALK4, TGFbR1, TGFbR2	SMpSAPVIFDR	1	S(1): 0.0; S(3): 100.0	96	Forward	Class I
O60749	1	Sorting nexin-2 OS=Homo sapiens GN=SNX2 PE=1 SV=2 - [SNX2_HUMAN]	O60749	S277	Sorting nexin-2 (Transformation-related gene 9 protein) (TRG-9)	SNX2 TRG9	AVNTQALSGAGILRM			AVNTQALpSGAGILR	1	T(4): 0.5; S(8): 99.5	94	Forward	Class I
O60759	1	Pleckstrin homology Sec7 and coiled-coil domains-binding protein OS=Homo sapiens GN=PSCDBP PE=1 SV=2 - [PSCBP_HUMAN]	O60759	T172	Cytohesin-interacting protein (Cytohesin binder and regulator) (CYBR) (Cytohesin-associated scaffolding protein) (CASP) (Cytohesin-binding protein HE) (Cbp HE) (Pleckstrin homology Sec7 and coiled-coil domains-binding protein)	CYTIP PSCDBP	GTMILKRTELEAKLQ			pTELEAK	1	T(1): 100.0	89	Forward	Class I
O60763	1	General vesicular transport factor p115 OS=Homo sapiens GN=USO1 PE=1 SV=2 - [USO1_HUMAN]	O60763	S851	General vesicular transport factor p115 (Protein USO1 homolog) (Transcytosis-associated protein) (TAP) (Vesicle-docking protein)	USO1 VDP	TDVEGRLSALLQETK			LpSALLQETK	1	S(2): 100.0; T(8): 0.0	77	Forward	Class I
O60763	1	General vesicular transport factor p115 OS=Homo sapiens GN=USO1 PE=1 SV=2 - [USO1_HUMAN]	O60763	S942	General vesicular transport factor p115 (Protein USO1 homolog) (Transcytosis-associated protein) (TAP) (Vesicle-docking protein)	USO1 VDP	EEEDELESGDQEDED			DLGHPVEEEDELEpSGDQEDEDDESEDPGK	1	S(14): 100.0; S(24): 0.0	397	Forward	Class I
O60763	1	General vesicular transport factor p115 OS=Homo sapiens GN=USO1 PE=1 SV=2 - [USO1_HUMAN]	O60763	S952	General vesicular transport factor p115 (Protein USO1 homolog) (Transcytosis-associated protein) (TAP) (Vesicle-docking protein)	USO1 VDP	QEDEDDESEDPGKDL			DLGHPVEEEDELESGDQEDEDDEpSEDPGK	1	S(14): 0.0; S(24): 100.0	330	Forward	Class I
O60825	1	6-phosphofructo-2-kinase/fructose-2,6-biphosphatase 2 OS=Homo sapiens GN=PFKFB2 PE=1 SV=2 - [F262_HUMAN]	O60825	S466	6-phosphofructo-2-kinase/fructose-2,6-bisphosphatase 2 (6PF-2-K/Fru-2,6-P2ase 2) (PFK/FBPase 2) (6PF-2-K/Fru-2,6-P2ase heart-type isozyme) [Includes: 6-phosphofructo-2-kinase (EC 2.7.1.105); Fructose-2,6-bisphosphatase (EC 3.1.3.46)]	PFKFB2	PVRMRRNSFTPLSSS	AGC/AKT	AKT1	RNpSFTPLSSSNTIR	1	S(3): 100.0; T(5): 0.0; S(8): 0.0; S(9): 0.0; S(10): 0.0; T(12): 0.0	314	Forward	Class I
O60832	1	H/ACA ribonucleoprotein complex subunit 4 OS=Homo sapiens GN=DKC1 PE=1 SV=3 - [DKC1_HUMAN]	O60832	S453	H/ACA ribonucleoprotein complex subunit 4 (EC 5.4.99.-) (CBF5 homolog) (Dyskerin) (Nopp140-associated protein of 57 kDa) (Nucleolar protein NAP57) (Nucleolar protein family A member 4) (snoRNP protein DKC1)	DKC1 NOLA4	KRKRESESESDETPP	Other/CK2	CK2a2	ESEpSESDETPPAAPQLIKK	1	S(2): 0.0; S(4): 100.0; S(6): 0.0; T(9): 0.0	208	Forward	Class I
O60832	1	H/ACA ribonucleoprotein complex subunit 4 OS=Homo sapiens GN=DKC1 PE=1 SV=3 - [DKC1_HUMAN]	O60832	S455	H/ACA ribonucleoprotein complex subunit 4 (EC 5.4.99.-) (CBF5 homolog) (Dyskerin) (Nopp140-associated protein of 57 kDa) (Nucleolar protein NAP57) (Nucleolar protein family A member 4) (snoRNP protein DKC1)	DKC1 NOLA4	KRESESESDETPPAA	Other/CK2	CK2a2	ESESEpSDETPPAAPQLIKK	1	S(2): 0.0; S(4): 0.0; S(6): 100.0; T(9): 0.0	239	Forward	Class I
O60832	1	H/ACA ribonucleoprotein complex subunit 4 OS=Homo sapiens GN=DKC1 PE=1 SV=3 - [DKC1_HUMAN]	O60832	S485	H/ACA ribonucleoprotein complex subunit 4 (EC 5.4.99.-) (CBF5 homolog) (Dyskerin) (Nopp140-associated protein of 57 kDa) (Nucleolar protein NAP57) (Nucleolar protein family A member 4) (snoRNP protein DKC1)	DKC1 NOLA4	KAKAGLESGAEPGDG	Other/CK2	CK2a2	AGLEpSGAEPGDGDSDTTKK	1	S(5): 100.0; S(14): 0.0; T(16): 0.0; T(17): 0.0	330	Forward	Class I
O60832	1	H/ACA ribonucleoprotein complex subunit 4 OS=Homo sapiens GN=DKC1 PE=1 SV=3 - [DKC1_HUMAN]	O60832	S494	H/ACA ribonucleoprotein complex subunit 4 (EC 5.4.99.-) (CBF5 homolog) (Dyskerin) (Nopp140-associated protein of 57 kDa) (Nucleolar protein NAP57) (Nucleolar protein family A member 4) (snoRNP protein DKC1)	DKC1 NOLA4	AEPGDGDSDTTKKKK	Other/CK2	CK2a2	AGLESGAEPGDGDpSDTTK	1	S(5): 0.0; S(14): 100.0; T(16): 0.0; T(17): 0.0	455	Forward	Class I
O60832	1	H/ACA ribonucleoprotein complex subunit 4 OS=Homo sapiens GN=DKC1 PE=1 SV=3 - [DKC1_HUMAN]	O60832	T496	H/ACA ribonucleoprotein complex subunit 4 (EC 5.4.99.-) (CBF5 homolog) (Dyskerin) (Nopp140-associated protein of 57 kDa) (Nucleolar protein NAP57) (Nucleolar protein family A member 4) (snoRNP protein DKC1)	DKC1 NOLA4	PGDGDSDTTKKKKKK	Other/CK2	CK2a2	AGLESGAEPGDGDSDpTTK	1	S(5): 0.0; S(14): 9.0; T(16): 82.0; T(17): 9.0	59	Forward	Class I
O60832	1	H/ACA ribonucleoprotein complex subunit 4 OS=Homo sapiens GN=DKC1 PE=1 SV=3 - [DKC1_HUMAN]	O60832	S513	H/ACA ribonucleoprotein complex subunit 4 (EC 5.4.99.-) (CBF5 homolog) (Dyskerin) (Nopp140-associated protein of 57 kDa) (Nucleolar protein NAP57) (Nucleolar protein family A member 4) (snoRNP protein DKC1)	DKC1 NOLA4	AKEVELVSE******	Other/CK2	CK2a2	AKEVELVpSE	1	S(8): 100.0	116	Forward	Class I
O60841	1	Eukaryotic translation initiation factor 5B OS=Homo sapiens GN=EIF5B PE=1 SV=3 - [IF2P_HUMAN]	O60841	S107	Eukaryotic translation initiation factor 5B (eIF-5B) (Translation initiation factor IF-2)	EIF5B IF2 KIAA0741	GQKGKKQSFDDNDSE	AGC	LATS1	KQpSFDDNDSEELEDKDSK	1	S(3): 98.9; S(9): 1.1; S(17): 0.0	93	Forward	Class I
O60841	1	Eukaryotic translation initiation factor 5B OS=Homo sapiens GN=EIF5B PE=1 SV=3 - [IF2P_HUMAN]	O60841	S113	Eukaryotic translation initiation factor 5B (eIF-5B) (Translation initiation factor IF-2)	EIF5B IF2 KIAA0741	QSFDDNDSEELEDKD			KQSFDDNDpSEELEDK	1	S(3): 0.0; S(9): 100.0	438	Forward	Class I
O60841	1	Eukaryotic translation initiation factor 5B OS=Homo sapiens GN=EIF5B PE=1 SV=3 - [IF2P_HUMAN]	O60841	Y134	Eukaryotic translation initiation factor 5B (eIF-5B) (Translation initiation factor IF-2)	EIF5B IF2 KIAA0741	AKPKVEMYSGSDDDD			VEMpYpSGSDDDDDFNKLPK	2	Y(4): 98.7; S(5): 98.7; S(7): 2.6	102	Forward	Class I
O60841	1	Eukaryotic translation initiation factor 5B OS=Homo sapiens GN=EIF5B PE=1 SV=3 - [IF2P_HUMAN]	O60841	S135	Eukaryotic translation initiation factor 5B (eIF-5B) (Translation initiation factor IF-2)	EIF5B IF2 KIAA0741	KPKVEMYSGSDDDDD			VEMYpSGpSDDDDDFNK	2	Y(4): 0.0; S(5): 100.0; S(7): 100.0	287	Forward	Class I
O60841	1	Eukaryotic translation initiation factor 5B OS=Homo sapiens GN=EIF5B PE=1 SV=3 - [IF2P_HUMAN]	O60841	S137	Eukaryotic translation initiation factor 5B (eIF-5B) (Translation initiation factor IF-2)	EIF5B IF2 KIAA0741	KVEMYSGSDDDDDFN			VEMYSGpSDDDDDFNKLPK	1	Y(4): 0.0; S(5): 0.0; S(7): 100.0	335	Forward	Class I
O60841	1	Eukaryotic translation initiation factor 5B OS=Homo sapiens GN=EIF5B PE=1 SV=3 - [IF2P_HUMAN]	O60841	S164	Eukaryotic translation initiation factor 5B (eIF-5B) (Translation initiation factor IF-2)	EIF5B IF2 KIAA0741	SNKKWDGSEEDEDNS			KWDGpSEEDEDNSKK	1	S(5): 100.0; S(12): 0.0	387	Forward	Class I
O60841	1	Eukaryotic translation initiation factor 5B OS=Homo sapiens GN=EIF5B PE=1 SV=3 - [IF2P_HUMAN]	O60841	S214	Eukaryotic translation initiation factor 5B (eIF-5B) (Translation initiation factor IF-2)	EIF5B IF2 KIAA0741	KPGPNIESGNEDDDA			NKPGPNIEpSGNEDDDASFK	1	S(9): 100.0; S(17): 0.0	381	Forward	Class I
O60841	1	Eukaryotic translation initiation factor 5B OS=Homo sapiens GN=EIF5B PE=1 SV=3 - [IF2P_HUMAN]	O60841	T286	Eukaryotic translation initiation factor 5B (eIF-5B) (Translation initiation factor IF-2)	EIF5B IF2 KIAA0741	ETVKSKVTVDTGVIP			VpTVDTGVIPApSEEK	2	T(2): 100.0; T(5): 0.0; S(11): 100.0	168	Forward	Class I
O60841	1	Eukaryotic translation initiation factor 5B OS=Homo sapiens GN=EIF5B PE=1 SV=3 - [IF2P_HUMAN]	O60841	S295	Eukaryotic translation initiation factor 5B (eIF-5B) (Translation initiation factor IF-2)	EIF5B IF2 KIAA0741	DTGVIPASEEKAETP			VpTVDTGVIPApSEEK	2	T(2): 100.0; T(5): 0.0; S(11): 100.0	168	Forward	Class I
O60841	1	Eukaryotic translation initiation factor 5B OS=Homo sapiens GN=EIF5B PE=1 SV=3 - [IF2P_HUMAN]	O60841	S1168	Eukaryotic translation initiation factor 5B (eIF-5B) (Translation initiation factor IF-2)	EIF5B IF2 KIAA0741	IEPIPGESPKMFGRH			IEPIPGEpSPK	1	S(8): 100.0	117	Forward	Class I
O60885	1	Bromodomain-containing protein 4 OS=Homo sapiens GN=BRD4 PE=1 SV=2 - [BRD4_HUMAN]	O60885	S470	Bromodomain-containing protein 4 (Protein HUNK1)	BRD4 HUNK1	EPVVAVSSPAVPPPT	Atypical/PIKK/FRAP	FRAP	MPDEPEEPVVAVSpSPAVPPPTK	1	S(13): 0.3; S(14): 99.7; T(21): 0.0	188	Forward	Class I
O60885	1	Bromodomain-containing protein 4 OS=Homo sapiens GN=BRD4 PE=1 SV=2 - [BRD4_HUMAN]	O60885	S593	Bromodomain-containing protein 4 (Protein HUNK1)	BRD4 HUNK1	KEPAPMKSKPPPTYE			pSKPPPTYESEEEDK	1	S(1): 98.2; T(6): 0.0; Y(7): 0.0; S(9): 1.7	104	Forward	Class I
O60885	1	Bromodomain-containing protein 4 OS=Homo sapiens GN=BRD4 PE=1 SV=2 - [BRD4_HUMAN]	O60885	Y599	Bromodomain-containing protein 4 (Protein HUNK1)	BRD4 HUNK1	KSKPPPTYESEEEDK	TK/Trk	TRKA, TRKC	SKPPPTpYESEEEDK	1	S(1): 0.0; T(6): 0.3; Y(7): 99.4; S(9): 0.3	92	Forward	Class I
O60885	1	Bromodomain-containing protein 4 OS=Homo sapiens GN=BRD4 PE=1 SV=2 - [BRD4_HUMAN]	O60885	S601	Bromodomain-containing protein 4 (Protein HUNK1)	BRD4 HUNK1	KPPPTYESEEEDKCK	CMGC/CDK/CDC2	CDC2, CDK2, CDK3	SKPPPTYEpSEEEDK	1	S(1): 0.0; T(6): 0.0; Y(7): 0.0; S(9): 100.0	250	Forward	Class I
O60885	1	Bromodomain-containing protein 4 OS=Homo sapiens GN=BRD4 PE=1 SV=2 - [BRD4_HUMAN]	O60885	S1117	Bromodomain-containing protein 4 (Protein HUNK1)	BRD4 HUNK1	VKEEKIHSPIIRSEP	Atypical/PIKK/FRAP	FRAP	IHpSPIIR	1	S(3): 100.0	67	Forward	Class I
O60885	1	Bromodomain-containing protein 4 OS=Homo sapiens GN=BRD4 PE=1 SV=2 - [BRD4_HUMAN]	O60885	S1262	Bromodomain-containing protein 4 (Protein HUNK1)	BRD4 HUNK1	LRQERMRSREDEDAL			pSREDEDALEQAR	1	S(1): 100.0	128	Forward	Class I
O60930	1	Ribonuclease H1 OS=Homo sapiens GN=RNASEH1 PE=1 SV=2 - [RNH1_HUMAN]	O60930	S76	Ribonuclease H1 (RNase H1) (EC 3.1.26.4) (Ribonuclease H type II)	RNASEH1 RNH1	AFVRKSASPEVSEGH			SApSPEVSEGHENQHGQESEAK	1	S(1): 0.3; S(3): 99.7; S(7): 0.0; S(18): 0.0	211	Forward	Class I
O60941	1	Dystrobrevin beta OS=Homo sapiens GN=DTNB PE=1 SV=1 - [DTNB_HUMAN]	O60941	T468	Dystrobrevin beta (DTN-B) (Beta-dystrobrevin)	DTNB	HEQASQPTPEKAQQN			LRLEHEQASQPpTPEK	1	S(9): 0.0; T(12): 100.0	123	Forward	Class I
O75037	1	Kinesin-like protein KIF21B OS=Homo sapiens GN=KIF21B PE=2 SV=2 - [KI21B_HUMAN]	O75037	T681	Kinesin-like protein KIF21B	KIF21B KIAA0449	LQNKIRDTQLERDRV			IRDpTQLERDR	1	T(4): 100.0	119	Forward	Class I
O75037	1	Kinesin-like protein KIF21B OS=Homo sapiens GN=KIF21B PE=2 SV=2 - [KI21B_HUMAN]	O75037	T1237	Kinesin-like protein KIF21B	KIF21B KIAA0449	RSTDVGFTPPSSPPT			STDVGFpTPPSpSPPTRPR	2	S(1): 0.0; T(2): 0.0; T(7): 98.6; S(10): 2.7; S(11): 97.3; T(14): 1.4	151	Forward	Class I
O75037	1	Kinesin-like protein KIF21B OS=Homo sapiens GN=KIF21B PE=2 SV=2 - [KI21B_HUMAN]	O75037	S1241	Kinesin-like protein KIF21B	KIF21B KIAA0449	VGFTPPSSPPTRPRN			STDVGFpTPPSpSPPTRPR	2	S(1): 0.0; T(2): 0.0; T(7): 98.6; S(10): 2.7; S(11): 97.3; T(14): 1.4	151	Forward	Class I
O75037	1	Kinesin-like protein KIF21B OS=Homo sapiens GN=KIF21B PE=2 SV=2 - [KI21B_HUMAN]	O75037	T1244	Kinesin-like protein KIF21B	KIF21B KIAA0449	TPPSSPPTRPRNDRN			STDVGFpTPPSSPPpTRPR	2	S(1): 0.0; T(2): 0.0; T(7): 98.9; S(10): 1.0; S(11): 1.1; T(14): 99.0	147	Forward	Class I
O75044	1	SLIT-ROBO Rho GTPase-activating protein 2 OS=Homo sapiens GN=SRGAP2 PE=1 SV=2 - [FNBP2_HUMAN]	O75044	S206	SLIT-ROBO Rho GTPase-activating protein 2 (srGAP2) (Formin-binding protein 2) (Rho GTPase-activating protein 34)	SRGAP2 ARHGAP34 FNBP2 KIAA0456	EDRQTPRSPDSTANV			QTPRpSPDSTANVR	1	T(2): 0.0; S(5): 100.0; S(8): 0.0; T(9): 0.0	234	Forward	Class I
O75044	1	SLIT-ROBO Rho GTPase-activating protein 2 OS=Homo sapiens GN=SRGAP2 PE=1 SV=2 - [FNBP2_HUMAN]	O75044	S916	SLIT-ROBO Rho GTPase-activating protein 2 (srGAP2) (Formin-binding protein 2) (Rho GTPase-activating protein 34)	SRGAP2 ARHGAP34 FNBP2 KIAA0456	SLKNRLDSPQIRKTA			NRLDpSPQIRK	1	S(5): 100.0	257	Forward	Class I
O75052	1	Carboxyl-terminal PDZ ligand of neuronal nitric oxide synthase protein OS=Homo sapiens GN=NOS1AP PE=1 SV=3 - [CAPON_HUMAN]	O75052	S266	Carboxyl-terminal PDZ ligand of neuronal nitric oxide synthase protein (C-terminal PDZ ligand of neuronal nitric oxide synthase protein) (Nitric oxide synthase 1 adaptor protein)	NOS1AP CAPON KIAA0464	QEPMLTASPRMLLPS	Atypical/PIKK/FRAP	FRAP	VSHPQEPMLTApSPR	1	S(2): 0.0; T(10): 0.0; S(12): 100.0	238	Forward	Class I
O75113	1	NEDD4-binding protein 1 OS=Homo sapiens GN=N4BP1 PE=1 SV=3 - [N4BP1_HUMAN]	O75113	T242	NEDD4-binding protein 1 (N4BP1)	N4BP1 KIAA0615	EARNKAGTPVSELTK			NKAGpTPVSELTK	1	T(5): 100.0; S(8): 0.0; T(11): 0.0	125	Forward	Class I
O75113	1	NEDD4-binding protein 1 OS=Homo sapiens GN=N4BP1 PE=1 SV=3 - [N4BP1_HUMAN]	O75113	S300	NEDD4-binding protein 1 (N4BP1)	N4BP1 KIAA0615	RHTKKQFSLENVQEG			QFpSLENVQEGEILHDAK	1	S(3): 100.0	286	Forward	Class I
O75116	1	Rho-associated protein kinase 2 OS=Homo sapiens GN=ROCK2 PE=1 SV=3 - [ROCK2_HUMAN]	O75116	T16	Rho-associated protein kinase 2 (EC 2.7.11.1) (Rho kinase 2) (Rho-associated, coiled-coil-containing protein kinase 2) (Rho-associated, coiled-coil-containing protein kinase II) (ROCK-II) (p164 ROCK-2)	ROCK2 KIAA0619	KMPGAPETAPGDGAG			MPGAPEpTAPGDGAGASR	1	T(7): 89.5; S(16): 10.5	22	Forward	Class I
O75116	1	Rho-associated protein kinase 2 OS=Homo sapiens GN=ROCK2 PE=1 SV=3 - [ROCK2_HUMAN]	O75116	Y722	Rho-associated protein kinase 2 (EC 2.7.11.1) (Rho kinase 2) (Rho-associated, coiled-coil-containing protein kinase 2) (Rho-associated, coiled-coil-containing protein kinase II) (ROCK-II) (p164 ROCK-2)	ROCK2 KIAA0619	LADKNKIYESIEEAK	TK/Fak	FAK, PYK2	IpYESIEEAKSEAMK	1	Y(2): 100.0; S(4): 0.0; S(10): 0.0	121	Forward	Class I
O75116	1	Rho-associated protein kinase 2 OS=Homo sapiens GN=ROCK2 PE=1 SV=3 - [ROCK2_HUMAN]	O75116	S1362	Rho-associated protein kinase 2 (EC 2.7.11.1) (Rho kinase 2) (Rho-associated, coiled-coil-containing protein kinase 2) (Rho-associated, coiled-coil-containing protein kinase II) (ROCK-II) (p164 ROCK-2)	ROCK2 KIAA0619	PDPFARSSPRTSMKI	Atypical/PIKK/FRAP	FRAP	KPPAPDPFARSpSPR	1	S(11): 0.0; S(12): 100.0	225	Forward	Class I
O75116	1	Rho-associated protein kinase 2 OS=Homo sapiens GN=ROCK2 PE=1 SV=3 - [ROCK2_HUMAN]	O75116	S1374	Rho-associated protein kinase 2 (EC 2.7.11.1) (Rho kinase 2) (Rho-associated, coiled-coil-containing protein kinase 2) (Rho-associated, coiled-coil-containing protein kinase II) (ROCK-II) (p164 ROCK-2)	ROCK2 KIAA0619	MKIQQNQSIRRPSRQ	AGC/PKC	PKCa	IQQNQpSIRRPSR	1	S(6): 100.0; S(11): 0.0	245	Forward	Class I
O75116	1	Rho-associated protein kinase 2 OS=Homo sapiens GN=ROCK2 PE=1 SV=3 - [ROCK2_HUMAN]	O75116	S1379	Rho-associated protein kinase 2 (EC 2.7.11.1) (Rho kinase 2) (Rho-associated, coiled-coil-containing protein kinase 2) (Rho-associated, coiled-coil-containing protein kinase II) (ROCK-II) (p164 ROCK-2)	ROCK2 KIAA0619	NQSIRRPSRQLAPNK			RPpSRQLAPNKPS	1	S(3): 100.0; S(12): 0.0	174	Forward	Class I
O75122	1	CLIP-associating protein 2 OS=Homo sapiens GN=CLASP2 PE=1 SV=2 - [CLAP2_HUMAN]	O75122	S327	CLIP-associating protein 2 (Cytoplasmic linker-associated protein 2) (Protein Orbit homolog 2) (hOrbit2)	CLASP2 KIAA0627	SDRSSSSSQESLNRP	CK1	CK1d, CK1e	SSSSpSQESLNRPFSSK	1	S(1): 0.0; S(2): 0.0; S(3): 0.0; S(4): 0.0; S(5): 100.0; S(8): 0.0; S(14): 0.0; S(15): 0.0	318	Forward	Class I
O75122	1	CLIP-associating protein 2 OS=Homo sapiens GN=CLASP2 PE=1 SV=2 - [CLAP2_HUMAN]	O75122	S359	CLIP-associating protein 2 (Cytoplasmic linker-associated protein 2) (Protein Orbit homolog 2) (hOrbit2)	CLASP2 KIAA0627	SAGSSKASSLPGSLQ			ApSSLPGSLQR	1	S(2): 99.0; S(3): 1.0; S(7): 0.0	92	Forward	Class I
O75122	1	CLIP-associating protein 2 OS=Homo sapiens GN=CLASP2 PE=1 SV=2 - [CLAP2_HUMAN]	O75122	S360	CLIP-associating protein 2 (Cytoplasmic linker-associated protein 2) (Protein Orbit homolog 2) (hOrbit2)	CLASP2 KIAA0627	AGSSKASSLPGSLQR			ASpSLPGSLQR	1	S(2): 0.8; S(3): 99.2; S(7): 0.0	103	Forward	Class I
O75122	1	CLIP-associating protein 2 OS=Homo sapiens GN=CLASP2 PE=1 SV=2 - [CLAP2_HUMAN]	O75122	S364	CLIP-associating protein 2 (Cytoplasmic linker-associated protein 2) (Protein Orbit homolog 2) (hOrbit2)	CLASP2 KIAA0627	KASSLPGSLQRSRSD			ASpSLPGpSLQR	2	S(2): 50.4; S(3): 50.4; S(7): 99.1	17	Forward	Class I
O75122	1	CLIP-associating protein 2 OS=Homo sapiens GN=CLASP2 PE=1 SV=2 - [CLAP2_HUMAN]	O75122	S370	CLIP-associating protein 2 (Cytoplasmic linker-associated protein 2) (Protein Orbit homolog 2) (hOrbit2)	CLASP2 KIAA0627	GSLQRSRSDIDVNAA			SRpSDIDVNAAAGAK	1	S(1): 0.0; S(3): 100.0	306	Forward	Class I
O75122	1	CLIP-associating protein 2 OS=Homo sapiens GN=CLASP2 PE=1 SV=2 - [CLAP2_HUMAN]	O75122	S455	CLIP-associating protein 2 (Cytoplasmic linker-associated protein 2) (Protein Orbit homolog 2) (hOrbit2)	CLASP2 KIAA0627	RTKMVSQSQPGSRSG			MVSQpSQPGpSRSGpSPGR	3	S(3): 0.0; S(5): 100.0; S(9): 100.0; S(11): 0.0; S(13): 100.0	262	Forward	Class I
O75122	1	CLIP-associating protein 2 OS=Homo sapiens GN=CLASP2 PE=1 SV=2 - [CLAP2_HUMAN]	O75122	S459	CLIP-associating protein 2 (Cytoplasmic linker-associated protein 2) (Protein Orbit homolog 2) (hOrbit2)	CLASP2 KIAA0627	VSQSQPGSRSGSPGR			MVSQpSQPGpSRSGpSPGR	3	S(3): 0.0; S(5): 100.0; S(9): 100.0; S(11): 0.0; S(13): 100.0	262	Forward	Class I
O75122	1	CLIP-associating protein 2 OS=Homo sapiens GN=CLASP2 PE=1 SV=2 - [CLAP2_HUMAN]	O75122	S463	CLIP-associating protein 2 (Cytoplasmic linker-associated protein 2) (Protein Orbit homolog 2) (hOrbit2)	CLASP2 KIAA0627	QPGSRSGSPGRVLTT			MVSQpSQPGpSRSGpSPGR	3	S(3): 0.0; S(5): 100.0; S(9): 100.0; S(11): 0.0; S(13): 100.0	262	Forward	Class I
O75122	1	CLIP-associating protein 2 OS=Homo sapiens GN=CLASP2 PE=1 SV=2 - [CLAP2_HUMAN]	O75122	S525	CLIP-associating protein 2 (Cytoplasmic linker-associated protein 2) (Protein Orbit homolog 2) (hOrbit2)	CLASP2 KIAA0627	RIPRPSVSQGCSREA			IPRPSVpSQGCpSR	2	S(5): 0.0; S(7): 100.0; S(11): 100.0	237	Forward	Class I
O75122	1	CLIP-associating protein 2 OS=Homo sapiens GN=CLASP2 PE=1 SV=2 - [CLAP2_HUMAN]	O75122	S529	CLIP-associating protein 2 (Cytoplasmic linker-associated protein 2) (Protein Orbit homolog 2) (hOrbit2)	CLASP2 KIAA0627	PSVSQGCSREASRES			IPRPSVpSQGCpSR	2	S(5): 0.0; S(7): 100.0; S(11): 100.0	237	Forward	Class I
O75122	1	CLIP-associating protein 2 OS=Homo sapiens GN=CLASP2 PE=1 SV=2 - [CLAP2_HUMAN]	O75122	S585	CLIP-associating protein 2 (Cytoplasmic linker-associated protein 2) (Protein Orbit homolog 2) (hOrbit2)	CLASP2 KIAA0627	QSSRLSSSVSAMRVL			LSSpSVSAMR	1	S(2): 0.1; S(3): 5.9; S(4): 88.1; S(6): 5.9	60	Forward	Class I
O75122	1	CLIP-associating protein 2 OS=Homo sapiens GN=CLASP2 PE=1 SV=2 - [CLAP2_HUMAN]	O75122	T594	CLIP-associating protein 2 (Cytoplasmic linker-associated protein 2) (Protein Orbit homolog 2) (hOrbit2)	CLASP2 KIAA0627	SAMRVLNTGSDVEEA			VLNpTGSDVEEAVADALK	1	T(4): 93.0; S(6): 7.0	94	Forward	Class I
O75122	1	CLIP-associating protein 2 OS=Homo sapiens GN=CLASP2 PE=1 SV=2 - [CLAP2_HUMAN]	O75122	S596	CLIP-associating protein 2 (Cytoplasmic linker-associated protein 2) (Protein Orbit homolog 2) (hOrbit2)	CLASP2 KIAA0627	MRVLNTGSDVEEAVA			VLNTGpSDVEEAVADALK	1	T(4): 0.0; S(6): 100.0	414	Forward	Class I
O75122	1	CLIP-associating protein 2 OS=Homo sapiens GN=CLASP2 PE=1 SV=2 - [CLAP2_HUMAN]	O75122	S1013	CLIP-associating protein 2 (Cytoplasmic linker-associated protein 2) (Protein Orbit homolog 2) (hOrbit2)	CLASP2 KIAA0627	HSMPTHSSPRSRDYN			ASLLHSMPTHSpSPR	1	S(2): 0.0; S(6): 0.0; T(9): 0.0; S(11): 0.0; S(12): 100.0	258	Forward	Class I
O75131	1	Copine-3 OS=Homo sapiens GN=CPNE3 PE=1 SV=1 - [CPNE3_HUMAN]	O75131	S243	Copine-3 (Copine III)	CPNE3 CPN3 KIAA0636	LKEASRSSPVEFECI			EASRSpSPVEFECINEK	1	S(3): 0.0; S(5): 0.0; S(6): 100.0	331	Forward	Class I
O75132	1	Zinc finger BED domain-containing protein 4 OS=Homo sapiens GN=ZBED4 PE=2 SV=1 - [ZBED4_HUMAN]	O75132	S624	Zinc finger BED domain-containing protein 4	ZBED4 KIAA0637	SETARPSSPDTRVPR			TEVSETARPSpSPDTR	1	T(1): 0.0; S(4): 0.0; T(6): 0.0; S(10): 0.0; S(11): 100.0; T(14): 0.0	208	Forward	Class I
O75145	1	Liprin-alpha-3 OS=Homo sapiens GN=PPFIA3 PE=1 SV=3 - [LIPA3_HUMAN]	O75145	S343	Liprin-alpha-3 (Protein tyrosine phosphatase receptor type f polypeptide-interacting protein alpha-3) (PTPRF-interacting protein alpha-3)	PPFIA3 KIAA0654	KESLYRQSEEKSRQL			ESLYRQpSEEK	1	S(2): 0.0; Y(4): 0.1; S(7): 99.9	109	Forward	Class I
O75146	1	Huntingtin-interacting protein 1-related protein OS=Homo sapiens GN=HIP1R PE=1 SV=2 - [HIP1R_HUMAN]	O75146	S1045	Huntingtin-interacting protein 1-related protein (HIP1-related protein) (Huntingtin-interacting protein 12) (HIP-12)	HIP1R HIP12 KIAA0655	PPLAQKPSVAPRQDH			KPPLAQKPpSVAPR	1	S(9): 100.0	187	Forward	Class I
O75151	1	PHD finger protein 2 OS=Homo sapiens GN=PHF2 PE=1 SV=3 - [PHF2_HUMAN]	O75151	S882	Lysine-specific demethylase PHF2 (EC 1.14.11.-) (GRC5) (PHD finger protein 2)	PHF2 KIAA0662	YVYPSLESDEDNPIF			DSDYVYPSLEpSDEDNPIFK	1	S(2): 0.0; Y(4): 0.0; Y(6): 0.0; S(8): 0.0; S(11): 100.0	241	Forward	Class I
O75151	1	PHD finger protein 2 OS=Homo sapiens GN=PHF2 PE=1 SV=3 - [PHF2_HUMAN]	O75151	S1061	Lysine-specific demethylase PHF2 (EC 1.14.11.-) (GRC5) (PHD finger protein 2)	PHF2 KIAA0662	FLTQRRPSASSPNNN			RPpSASSPNNNTAAK	1	S(3): 97.9; S(5): 2.1; S(6): 0.0; T(11): 0.0	84	Forward	Class I
O75152	1	Zinc finger CCCH domain-containing protein 11A OS=Homo sapiens GN=ZC3H11A PE=1 SV=3 - [ZC11A_HUMAN]	O75152	S108	Zinc finger CCCH domain-containing protein 11A	ZC3H11A KIAA0663 ZC3HDC11A	VLPTVPESPEEEVKA			TVLPTVPEpSPEEEVK	1	T(1): 0.0; T(5): 0.0; S(9): 100.0	225	Forward	Class I
O75152	1	Zinc finger CCCH domain-containing protein 11A OS=Homo sapiens GN=ZC3H11A PE=1 SV=3 - [ZC11A_HUMAN]	O75152	S290	Zinc finger CCCH domain-containing protein 11A	ZC3H11A KIAA0663 ZC3HDC11A	RLGKRKFSAGGDSDP			RKFpSAGGDSDPPLK	1	S(4): 100.0; S(9): 0.0	136	Forward	Class I
O75152	1	Zinc finger CCCH domain-containing protein 11A OS=Homo sapiens GN=ZC3H11A PE=1 SV=3 - [ZC11A_HUMAN]	O75152	S758	Zinc finger CCCH domain-containing protein 11A	ZC3H11A KIAA0663 ZC3HDC11A	SMKTRRLSSASTGKP			RLpSSASTGKPPLSVEDDFEK	1	S(3): 98.4; S(4): 0.5; S(6): 0.5; T(7): 0.5; S(13): 0.0	187	Forward	Class I
O75153	1	Putative eukaryotic translation initiation factor 3 subunit OS=Homo sapiens GN=KIAA0664 PE=1 SV=2 - [EIF3X_HUMAN]	O75153	S664	Protein KIAA0664	KIAA0664	PPGQEAGSEEEGSSA			SEDPPGQEAGpSEEEGSSASGLAK	1	S(1): 0.0; S(11): 100.0; S(16): 0.0; S(17): 0.0; S(19): 0.0	333	Forward	Class I
O75164	1	JmjC domain-containing histone demethylation protein 3A OS=Homo sapiens GN=JMJD2A PE=1 SV=1 - [JHD3A_HUMAN]	O75164	S523	Lysine-specific demethylase 4A (EC 1.14.11.-) (JmjC domain-containing histone demethylation protein 3A) (Jumonji domain-containing protein 2A)	KDM4A JHDM3A JMJD2 JMJD2A KIAA0677	SSRDSISSDSETSEP			DSISpSDSETSEPLSCR	1	S(2): 0.0; S(4): 0.3; S(5): 99.4; S(7): 0.3; T(9): 0.0; S(10): 0.0; S(14): 0.0	251	Forward	Class I
O75167	1	Phosphatase and actin regulator 2 OS=Homo sapiens GN=PHACTR2 PE=1 SV=2 - [PHAR2_HUMAN]	O75167	S16	Phosphatase and actin regulator 2	PHACTR2 C6orf56 KIAA0680	DKASIANSDGPTAGS			ASIANpSDGPTAGSQpTPPFK	2	S(2): 0.0; S(6): 100.0; T(10): 0.0; S(13): 0.0; T(15): 100.0	317	Forward	Class I
O75167	1	Phosphatase and actin regulator 2 OS=Homo sapiens GN=PHACTR2 PE=1 SV=2 - [PHAR2_HUMAN]	O75167	T20	Phosphatase and actin regulator 2	PHACTR2 C6orf56 KIAA0680	IANSDGPTAGSQTPP			ASIANSDGPpTAGSQpTPPFK	2	S(2): 0.0; S(6): 3.0; T(10): 94.1; S(13): 3.6; T(15): 99.4	72	Forward	Class I
O75167	1	Phosphatase and actin regulator 2 OS=Homo sapiens GN=PHACTR2 PE=1 SV=2 - [PHAR2_HUMAN]	O75167	S23	Phosphatase and actin regulator 2	PHACTR2 C6orf56 KIAA0680	SDGPTAGSQTPPFKR			ASIANSDGPTAGpSQTPPFK	1	S(2): 0.0; S(6): 0.0; T(10): 0.0; S(13): 99.3; T(15): 0.7	300	Forward	Class I
O75167	1	Phosphatase and actin regulator 2 OS=Homo sapiens GN=PHACTR2 PE=1 SV=2 - [PHAR2_HUMAN]	O75167	T25	Phosphatase and actin regulator 2	PHACTR2 C6orf56 KIAA0680	GPTAGSQTPPFKRKG			ASIANSDGPTAGSQpTPPFK	1	S(2): 0.0; S(6): 0.0; T(10): 0.0; S(13): 0.0; T(15): 100.0	324	Forward	Class I
O75167	1	Phosphatase and actin regulator 2 OS=Homo sapiens GN=PHACTR2 PE=1 SV=2 - [PHAR2_HUMAN]	O75167	S237	Phosphatase and actin regulator 2	PHACTR2 C6orf56 KIAA0680	TGSKASASPSTSSTS			ASApSPSTSSTSSRPK	1	S(2): 0.0; S(4): 100.0; S(6): 0.0; T(7): 0.0; S(8): 0.0; S(9): 0.0; T(10): 0.0; S(11): 0.0; S(12): 0.0	329	Forward	Class I
O75167	1	Phosphatase and actin regulator 2 OS=Homo sapiens GN=PHACTR2 PE=1 SV=2 - [PHAR2_HUMAN]	O75167	T263	Phosphatase and actin regulator 2	PHACTR2 C6orf56 KIAA0680	SKAGTVGTTKGKRKT			AGTVGpTTK	1	T(3): 0.0; T(6): 98.9; T(7): 1.1	65	Forward	Class I
O75167	1	Phosphatase and actin regulator 2 OS=Homo sapiens GN=PHACTR2 PE=1 SV=2 - [PHAR2_HUMAN]	O75167	S522	Phosphatase and actin regulator 2	PHACTR2 C6orf56 KIAA0680	TKLVRRLSQRPTTEE			RLpSQRPTTEELEQR	1	S(3): 100.0; T(7): 0.0; T(8): 0.0	270	Forward	Class I
O75170	1	SAPS domain family member 2 OS=Homo sapiens GN=SAPS2 PE=1 SV=2 - [SAPS2_HUMAN]	O75170	T136	Serine/threonine-protein phosphatase 6 regulatory subunit 2 (SAPS domain family member 2)	PPP6R2 KIAA0685 PP6R2 SAPS2	GNLIARKTEQVITFL			KpTEQVIpTFLKK	2	T(2): 100.0; T(7): 100.0	70	Forward	Class I
O75170	1	SAPS domain family member 2 OS=Homo sapiens GN=SAPS2 PE=1 SV=2 - [SAPS2_HUMAN]	O75170	T141	Serine/threonine-protein phosphatase 6 regulatory subunit 2 (SAPS domain family member 2)	PPP6R2 KIAA0685 PP6R2 SAPS2	RKTEQVITFLKKKDK			KpTEQVIpTFLKK	2	T(2): 100.0; T(7): 100.0	70	Forward	Class I
O75170	1	SAPS domain family member 2 OS=Homo sapiens GN=SAPS2 PE=1 SV=2 - [SAPS2_HUMAN]	O75170	S289	Serine/threonine-protein phosphatase 6 regulatory subunit 2 (SAPS domain family member 2)	PPP6R2 KIAA0685 PP6R2 SAPS2	GTEGLVDSFSQGLER			RVGTEGLVDpSFSQGLER	1	T(4): 0.0; S(10): 100.0; S(12): 0.0	397	Forward	Class I
O75170	1	SAPS domain family member 2 OS=Homo sapiens GN=SAPS2 PE=1 SV=2 - [SAPS2_HUMAN]	O75170	S771	Serine/threonine-protein phosphatase 6 regulatory subunit 2 (SAPS domain family member 2)	PPP6R2 KIAA0685 PP6R2 SAPS2	ESGPRCSSPVDTECS			CSpSPVDTECSHAEGSR	1	S(2): 0.3; S(3): 99.7; T(7): 0.0; S(10): 0.0; S(15): 0.0	328	Forward	Class I
O75179	1	Ankyrin repeat domain-containing protein 17 OS=Homo sapiens GN=ANKRD17 PE=1 SV=3 - [ANR17_HUMAN]	O75179	S1696	Ankyrin repeat domain-containing protein 17 (Gene trap ankyrin repeat protein) (Serologically defined breast cancer antigen NY-BR-16)	ANKRD17 GTAR KIAA0697	TCTKSGPSPLSSPNG	CMGC/CDK/CDC2	CDK2	SGPpSPLSpSPNGK	2	S(1): 0.5; S(4): 99.3; S(7): 50.1; S(8): 50.1	81	Forward	Class I
O75179	1	Ankyrin repeat domain-containing protein 17 OS=Homo sapiens GN=ANKRD17 PE=1 SV=3 - [ANR17_HUMAN]	O75179	S1709	Ankyrin repeat domain-containing protein 17 (Gene trap ankyrin repeat protein) (Serologically defined breast cancer antigen NY-BR-16)	ANKRD17 GTAR KIAA0697	NGKLTVASPKRGQKR	CMGC/CDK/CDC2	CDK2	LTVApSPK	1	T(2): 0.0; S(5): 100.0	97	Forward	Class I
O75179	1	Ankyrin repeat domain-containing protein 17 OS=Homo sapiens GN=ANKRD17 PE=1 SV=3 - [ANR17_HUMAN]	O75179	S2065	Ankyrin repeat domain-containing protein 17 (Gene trap ankyrin repeat protein) (Serologically defined breast cancer antigen NY-BR-16)	ANKRD17 GTAR KIAA0697	NSPLDCGSASPNKVA			NSPLDCGpSASPNK	1	S(2): 0.0; S(8): 99.8; S(10): 0.2	116	Forward	Class I
O75179	1	Ankyrin repeat domain-containing protein 17 OS=Homo sapiens GN=ANKRD17 PE=1 SV=3 - [ANR17_HUMAN]	O75179	S2067	Ankyrin repeat domain-containing protein 17 (Gene trap ankyrin repeat protein) (Serologically defined breast cancer antigen NY-BR-16)	ANKRD17 GTAR KIAA0697	PLDCGSASPNKVASS	CMGC/CDK/CDC2	CDK2	NSPLDCGSApSPNK	1	S(2): 0.0; S(8): 6.1; S(10): 93.9	92	Forward	Class I
O75179	1	Ankyrin repeat domain-containing protein 17 OS=Homo sapiens GN=ANKRD17 PE=1 SV=3 - [ANR17_HUMAN]	O75179	S2401	Ankyrin repeat domain-containing protein 17 (Gene trap ankyrin repeat protein) (Serologically defined breast cancer antigen NY-BR-16)	ANKRD17 GTAR KIAA0697	SSGVRAPSPAPSSVP	CMGC/CDK/CDC2	CDK2	APpSPAPSSVPLGSEKPSNVSQDR	1	S(3): 100.0; S(7): 0.0; S(8): 0.0; S(13): 0.0; S(17): 0.0; S(20): 0.0	180	Forward	Class I
O75182	1	Paired amphipathic helix protein Sin3b OS=Homo sapiens GN=SIN3B PE=1 SV=2 - [SIN3B_HUMAN]	O75182	S739	Paired amphipathic helix protein Sin3b (Histone deacetylase complex subunit Sin3b) (Transcriptional corepressor Sin3b)	SIN3B KIAA0700	KPAPGPHSSPPEEKG			KKPAPGPHpSSPPEEK	1	S(9): 99.2; S(10): 0.8	89	Forward	Class I
O75182	1	Paired amphipathic helix protein Sin3b OS=Homo sapiens GN=SIN3B PE=1 SV=2 - [SIN3B_HUMAN]	O75182	S740	Paired amphipathic helix protein Sin3b (Histone deacetylase complex subunit Sin3b) (Transcriptional corepressor Sin3b)	SIN3B KIAA0700	PAPGPHSSPPEEKGA			KKPAPGPHSpSPPEEK	1	S(9): 0.0; S(10): 100.0	199	Forward	Class I
O75190	1	DnaJ homolog subfamily B member 6 OS=Homo sapiens GN=DNAJB6 PE=1 SV=2 - [DNJB6_HUMAN]	O75190	S277	DnaJ homolog subfamily B member 6 (HHDJ1) (Heat shock protein J2) (HSJ-2) (MRJ) (MSJ-1)	DNAJB6 HSJ2 MRJ MSJ1	RHAPHCLSEEEGEQD	STE/STE-Unique/NIK	NIK	HAPHCLpSEEEGEQDRPR	1	S(7): 100.0	241	Forward	Class I
O75334	1	Liprin-alpha-2 OS=Homo sapiens GN=PPFIA2 PE=1 SV=1 - [LIPA2_HUMAN]	O75334	T773	Liprin-alpha-2 (Protein tyrosine phosphatase receptor type f polypeptide-interacting protein alpha-2) (PTPRF-interacting protein alpha-2)	PPFIA2	KATIKCETSPPPTPR			CEpTpSPPPTPR	2	T(3): 100.0; S(4): 100.0; T(8): 0.0	103	Forward	Class I
O75334	1	Liprin-alpha-2 OS=Homo sapiens GN=PPFIA2 PE=1 SV=1 - [LIPA2_HUMAN]	O75334	S774	Liprin-alpha-2 (Protein tyrosine phosphatase receptor type f polypeptide-interacting protein alpha-2) (PTPRF-interacting protein alpha-2)	PPFIA2	ATIKCETSPPPTPRA			CEpTpSPPPTPR	2	T(3): 100.0; S(4): 100.0; T(8): 0.0	103	Forward	Class I
O75339	1	Cartilage intermediate layer protein 1 OS=Homo sapiens GN=CILP PE=1 SV=2 - [CILP1_HUMAN]	O75339	T24	Cartilage intermediate layer protein 1 (CILP-1) (Cartilage intermediate-layer protein) [Cleaved into: Cartilage intermediate layer protein 1 C1; Cartilage intermediate layer protein 1 C2]	CILP UNQ602/PRO1188	TSVLGRQTMLTQSVR			QpTMLTQSVRR	1	T(2): 100.0; T(5): 0.0; S(7): 0.0	135	Forward	Class I
O75351	1	Vacuolar protein sorting-associating protein 4B OS=Homo sapiens GN=VPS4B PE=1 SV=2 - [VPS4B_HUMAN]	O75351	S102	Vacuolar protein sorting-associated protein 4B (Cell migration-inducing gene 1 protein) (Suppressor of K(+) transport growth defect 1) (Protein SKD1)	VPS4B SKD1 VPS42 MIG1	ADEKGNDSDGEGESD	CMGC/DYRK	HIPK2	EGQPSPADEKGNDpSDGEGESDDPEKK	1	S(5): 0.0; S(14): 100.0; S(20): 0.0	216	Forward	Class I
O75351	1	Vacuolar protein sorting-associating protein 4B OS=Homo sapiens GN=VPS4B PE=1 SV=2 - [VPS4B_HUMAN]	O75351	S108	Vacuolar protein sorting-associated protein 4B (Cell migration-inducing gene 1 protein) (Suppressor of K(+) transport growth defect 1) (Protein SKD1)	VPS4B SKD1 VPS42 MIG1	DSDGEGESDDPEKKK	CMGC/CDK	CDK4	EGQPSPADEKGNDSDGEGEpSDDPEKK	1	S(5): 0.3; S(14): 4.5; S(20): 95.2	58	Forward	Class I
O75367	1	Core histone macro-H2A.1 OS=Homo sapiens GN=H2AFY PE=1 SV=4 - [H2AY_HUMAN]	O75367	S170	Core histone macro-H2A.1 (Histone macroH2A1) (mH2A1) (Histone H2A.y) (H2A/y) (Medulloblastoma antigen MU-MB-50.205)	H2AFY MACROH2A1	GEVSKAASADSTTEG	CAMK/CAMKL/CHK1	CHK1	AApSADSTpTEGTPADGFTVLSTK	2	S(3): 99.2; S(6): 25.2; T(7): 25.2; T(8): 25.2; T(11): 25.2; T(17): 0.0; S(20): 0.0; T(21): 0.0	77	Forward	Class I
O75367	1	Core histone macro-H2A.1 OS=Homo sapiens GN=H2AFY PE=1 SV=4 - [H2AY_HUMAN]	O75367	S173	Core histone macro-H2A.1 (Histone macroH2A1) (mH2A1) (Histone H2A.y) (H2A/y) (Medulloblastoma antigen MU-MB-50.205)	H2AFY MACROH2A1	SKAASADSTTEGTPA	CK1	VRK1	AASADpSTTEGTPADGFTVLSTK	1	S(3): 0.0; S(6): 99.3; T(7): 0.7; T(8): 0.0; T(11): 0.0; T(17): 0.0; S(20): 0.0; T(21): 0.0	314	Forward	Class I
O75369	1	Filamin-B OS=Homo sapiens GN=FLNB PE=1 SV=1 - [FLNB_HUMAN]	O75369	T519	Filamin-B (FLN-B) (ABP-278) (ABP-280 homolog) (Actin-binding-like protein) (Beta-filamin) (Filamin homolog 1) (Fh1) (Filamin-3) (Thyroid autoantigen) (Truncated actin-binding protein) (Truncated ABP)	FLNB FLN1L FLN3 TABP TAP	AFEYYPSTPGRYSIA			DFLDGVYAFEYYPSpTPGR	1	Y(7): 0.0; Y(11): 0.0; Y(12): 0.0; S(14): 0.5; T(15): 99.5	252	Forward	Class I
O75369	1	Filamin-B OS=Homo sapiens GN=FLNB PE=1 SV=1 - [FLNB_HUMAN]	O75369	Y904	Filamin-B (FLN-B) (ABP-278) (ABP-280 homolog) (Actin-binding-like protein) (Beta-filamin) (Filamin homolog 1) (Fh1) (Filamin-3) (Thyroid autoantigen) (Truncated actin-binding protein) (Truncated ABP)	FLNB FLN1L FLN3 TABP TAP	DIIDNYDYSHTVKYT			DLDIIDNYDpYSHTVK	1	Y(8): 0.0; Y(10): 100.0; S(11): 0.0; T(13): 0.0	250	Forward	Class I
O75369	1	Filamin-B OS=Homo sapiens GN=FLNB PE=1 SV=1 - [FLNB_HUMAN]	O75369	S1505	Filamin-B (FLN-B) (ABP-278) (ABP-280 homolog) (Actin-binding-like protein) (Beta-filamin) (Filamin homolog 1) (Fh1) (Filamin-3) (Thyroid autoantigen) (Truncated actin-binding protein) (Truncated ABP)	FLNB FLN1L FLN3 TABP TAP	ADEEIPRSPFKVKVL			YADEEIPRpSPFK	1	Y(1): 0.0; S(9): 100.0	282	Forward	Class I
O75369	1	Filamin-B OS=Homo sapiens GN=FLNB PE=1 SV=1 - [FLNB_HUMAN]	O75369	S1916	Filamin-B (FLN-B) (ABP-278) (ABP-280 homolog) (Actin-binding-like protein) (Beta-filamin) (Filamin homolog 1) (Fh1) (Filamin-3) (Thyroid autoantigen) (Truncated actin-binding protein) (Truncated ABP)	FLNB FLN1L FLN3 TABP TAP	TDDSRRCSQVKLGSA			ITDDSRRCpSQVK	1	T(2): 0.0; S(5): 0.0; S(9): 100.0	199	Forward	Class I
O75369	1	Filamin-B OS=Homo sapiens GN=FLNB PE=1 SV=1 - [FLNB_HUMAN]	O75369	S2107	Filamin-B (FLN-B) (ABP-278) (ABP-280 homolog) (Actin-binding-like protein) (Beta-filamin) (Filamin homolog 1) (Fh1) (Filamin-3) (Thyroid autoantigen) (Truncated actin-binding protein) (Truncated ABP)	FLNB FLN1L FLN3 TABP TAP	TRTSRAPSVATVGSI			TSRAPpSVATVGSICDLNLK	1	T(1): 0.0; S(2): 0.0; S(6): 100.0; T(9): 0.0; S(12): 0.0	360	Forward	Class I
O75369	1	Filamin-B OS=Homo sapiens GN=FLNB PE=1 SV=1 - [FLNB_HUMAN]	O75369	T2110	Filamin-B (FLN-B) (ABP-278) (ABP-280 homolog) (Actin-binding-like protein) (Beta-filamin) (Filamin homolog 1) (Fh1) (Filamin-3) (Thyroid autoantigen) (Truncated actin-binding protein) (Truncated ABP)	FLNB FLN1L FLN3 TABP TAP	SRAPSVATVGSICDL			APSVApTVGSICDLNLK	1	S(3): 0.3; T(6): 99.7; S(9): 0.0	103	Forward	Class I
O75369	1	Filamin-B OS=Homo sapiens GN=FLNB PE=1 SV=1 - [FLNB_HUMAN]	O75369	S2135	Filamin-B (FLN-B) (ABP-278) (ABP-280 homolog) (Actin-binding-like protein) (Beta-filamin) (Filamin homolog 1) (Fh1) (Filamin-3) (Thyroid autoantigen) (Truncated actin-binding protein) (Truncated ABP)	FLNB FLN1L FLN3 TABP TAP	DMSAHVTSPSGRVTE			IPEINSSDMSAHVTpSPSGR	1	S(6): 0.0; S(7): 0.0; S(10): 0.0; T(14): 0.0; S(15): 100.0; S(17): 0.0	362	Forward	Class I
O75369;Q14315	2	Filamin-B OS=Homo sapiens GN=FLNB PE=1 SV=1 - [FLNB_HUMAN]|Filamin-C OS=Homo sapiens GN=FLNC PE=1 SV=2 - [FLNC_HUMAN]	O75369	S2227	Filamin-B (FLN-B) (ABP-278) (ABP-280 homolog) (Actin-binding-like protein) (Beta-filamin) (Filamin homolog 1) (Fh1) (Filamin-3) (Thyroid autoantigen) (Truncated actin-binding protein) (Truncated ABP)	FLNB FLN1L FLN3 TABP TAP	EAGAGGLSIAVEGPS			EAGAGGLpSIAVEGPSK	1	S(8): 100.0; S(15): 0.0	92	Forward	Class I	Q14315	S2348	Filamin-C (FLN-C) (FLNc) (ABP-280-like protein) (ABP-L) (Actin-binding-like protein) (Filamin-2) (Gamma-filamin)	FLNC ABPL FLN2
O75369	1	Filamin-B OS=Homo sapiens GN=FLNB PE=1 SV=1 - [FLNB_HUMAN]	O75369	S2465	Filamin-B (FLN-B) (ABP-278) (ABP-280 homolog) (Actin-binding-like protein) (Beta-filamin) (Filamin homolog 1) (Fh1) (Filamin-3) (Thyroid autoantigen) (Truncated actin-binding protein) (Truncated ABP)	FLNB FLN1L FLN3 TABP TAP	GPNHIVGSPFKAKVT			YGGPNHIVGpSPFK	1	Y(1): 0.0; S(10): 100.0	281	Forward	Class I
O75369	1	Filamin-B OS=Homo sapiens GN=FLNB PE=1 SV=1 - [FLNB_HUMAN]	O75369	S2478	Filamin-B (FLN-B) (ABP-278) (ABP-280 homolog) (Actin-binding-like protein) (Beta-filamin) (Filamin homolog 1) (Fh1) (Filamin-3) (Thyroid autoantigen) (Truncated actin-binding protein) (Truncated ABP)	FLNB FLN1L FLN3 TABP TAP	VTGQRLVSPGSANET	STE/STE11	MAP3K1	LVpSPGSANETSSILVESVTR	1	S(3): 99.7; S(6): 0.3; T(10): 0.0; S(11): 0.0; S(12): 0.0; S(17): 0.0; T(19): 0.0	275	Forward	Class I
O75369	1	Filamin-B OS=Homo sapiens GN=FLNB PE=1 SV=1 - [FLNB_HUMAN]	O75369	S2481	Filamin-B (FLN-B) (ABP-278) (ABP-280 homolog) (Actin-binding-like protein) (Beta-filamin) (Filamin homolog 1) (Fh1) (Filamin-3) (Thyroid autoantigen) (Truncated actin-binding protein) (Truncated ABP)	FLNB FLN1L FLN3 TABP TAP	QRLVSPGSANETSSI			LVSPGpSANETSSILVESVTR	1	S(3): 8.4; S(6): 82.2; T(10): 8.4; S(11): 1.0; S(12): 0.0; S(17): 0.0; T(19): 0.0	86	Forward	Class I
O75376	1	Nuclear receptor corepressor 1 OS=Homo sapiens GN=NCOR1 PE=1 SV=2 - [NCOR1_HUMAN]	O75376	S158	Nuclear receptor corepressor 1 (N-CoR) (N-CoR1)	NCOR1 KIAA1047	GKHEAPSSPISGQPC	Atypical/PIKK/FRAP	FRAP	HEAPSpSPISGQPCGDDQNASPSK	1	S(5): 0.7; S(6): 99.3; S(9): 0.0; S(20): 0.0; S(22): 0.0	310	Forward	Class I
O75376	1	Nuclear receptor corepressor 1 OS=Homo sapiens GN=NCOR1 PE=1 SV=2 - [NCOR1_HUMAN]	O75376	S224	Nuclear receptor corepressor 1 (N-CoR) (N-CoR1)	NCOR1 KIAA1047	PEPEKPVSPPPVEQK	CMGC/GSK	GSK3A	QQQLEEEAAKPPEPEKPVpSPPPVEQK	1	S(19): 100.0	265	Forward	Class I
O75376	1	Nuclear receptor corepressor 1 OS=Homo sapiens GN=NCOR1 PE=1 SV=2 - [NCOR1_HUMAN]	O75376	T557	Nuclear receptor corepressor 1 (N-CoR) (N-CoR1)	NCOR1 KIAA1047	EKDKIDGTAEETEER			IDGpTAEETEEREQATPR	1	T(4): 99.8; T(8): 0.2; T(15): 0.0	65	Forward	Class I
O75376	1	Nuclear receptor corepressor 1 OS=Homo sapiens GN=NCOR1 PE=1 SV=2 - [NCOR1_HUMAN]	O75376	S1111	Nuclear receptor corepressor 1 (N-CoR) (N-CoR1)	NCOR1 KIAA1047	YIKQEEFSPRSQNSQ	CMGC/CDK/CDC2	CDK2	SATLPYIKQEEFpSPR	1	S(1): 0.0; T(3): 0.0; Y(6): 0.0; S(13): 100.0	331	Forward	Class I
O75376	1	Nuclear receptor corepressor 1 OS=Homo sapiens GN=NCOR1 PE=1 SV=2 - [NCOR1_HUMAN]	O75376	S1281	Nuclear receptor corepressor 1 (N-CoR) (N-CoR1)	NCOR1 KIAA1047	CRALPRGSPHSDLKE			ALPRGpSPHSDLK	1	S(6): 100.0; S(9): 0.0	257	Forward	Class I
O75376	1	Nuclear receptor corepressor 1 OS=Homo sapiens GN=NCOR1 PE=1 SV=2 - [NCOR1_HUMAN]	O75376	S1322	Nuclear receptor corepressor 1 (N-CoR) (N-CoR1)	NCOR1 KIAA1047	PKQIKRESPPIRAFE			QIKREpSPPIR	1	S(6): 100.0	176	Forward	Class I
O75376	1	Nuclear receptor corepressor 1 OS=Homo sapiens GN=NCOR1 PE=1 SV=2 - [NCOR1_HUMAN]	O75376	S1472	Nuclear receptor corepressor 1 (N-CoR) (N-CoR1)	NCOR1 KIAA1047	EAPKAQLSPGIYDDT	CMGC/DYRK	HIPK2, PRP4	AQLpSPGIYDDTSAR	1	S(4): 100.0; Y(8): 0.0; T(11): 0.0; S(12): 0.0	209	Forward	Class I
O75376	1	Nuclear receptor corepressor 1 OS=Homo sapiens GN=NCOR1 PE=1 SV=2 - [NCOR1_HUMAN]	O75376	S1758	Nuclear receptor corepressor 1 (N-CoR) (N-CoR1)	NCOR1 KIAA1047	HGYVRSPSPSVRTQE			SPpSPSVR	1	S(1): 0.7; S(3): 99.3; S(5): 0.0	36	Forward	Class I
O75376	1	Nuclear receptor corepressor 1 OS=Homo sapiens GN=NCOR1 PE=1 SV=2 - [NCOR1_HUMAN]	O75376	S2120	Nuclear receptor corepressor 1 (N-CoR) (N-CoR1)	NCOR1 KIAA1047	QRPGSRVSPENLVDK	Atypical/PIKK/FRAP	FRAP	VpSPENLVDK	1	S(2): 100.0	116	Forward	Class I
O75376	1	Nuclear receptor corepressor 1 OS=Homo sapiens GN=NCOR1 PE=1 SV=2 - [NCOR1_HUMAN]	O75376	S2151	Nuclear receptor corepressor 1 (N-CoR) (N-CoR1)	NCOR1 KIAA1047	SEPYEPISPPQVPVV	CMGC/GSK	GSK3A	SHVSSEPYEPIpSPPQVPVVHEK	1	S(1): 0.0; S(4): 0.0; S(5): 0.0; Y(8): 0.0; S(12): 100.0	291	Forward	Class I
O75376	1	Nuclear receptor corepressor 1 OS=Homo sapiens GN=NCOR1 PE=1 SV=2 - [NCOR1_HUMAN]	O75376	S2184	Nuclear receptor corepressor 1 (N-CoR) (N-CoR1)	NCOR1 KIAA1047	EQRNDARSPGSISYL	Atypical/PIKK/FRAP	FRAP	NDARpSPGSISYLPSFFTK	1	S(5): 100.0; S(8): 0.0; S(10): 0.0; Y(11): 0.0; S(14): 0.0; T(17): 0.0	362	Forward	Class I
O75376	1	Nuclear receptor corepressor 1 OS=Homo sapiens GN=NCOR1 PE=1 SV=2 - [NCOR1_HUMAN]	O75376	S2315	Nuclear receptor corepressor 1 (N-CoR) (N-CoR1)	NCOR1 KIAA1047	RREEGDPSPHSGGVC			REEGDPpSPHSGGVCKPK	1	S(7): 100.0; S(10): 0.0	233	Forward	Class I
O75379	1	Vesicle-associated membrane protein 4 OS=Homo sapiens GN=VAMP4 PE=1 SV=2 - [VAMP4_HUMAN]	O75379	S30	Vesicle-associated membrane protein 4 (VAMP-4)	VAMP4	RNLLEDDSDEEEDFF	Other/CK2	CK2a1, CK2a2	NLLEDDpSDEEEDFFLR	1	S(7): 100.0	361	Forward	Class I
O75382	1	Tripartite motif-containing protein 3 OS=Homo sapiens GN=TRIM3 PE=1 SV=1 - [TRIM3_HUMAN]	O75382	S7	Tripartite motif-containing protein 3 (Brain-expressed RING finger protein) (RING finger protein 22) (RING finger protein 97)	TRIM3 BERP RNF22 RNF97	*MAKREDSPGPEVQP	CAMK/CAMK2	CaMK2g	REDpSPGPEVQPMDK	1	S(4): 100.0	297	Forward	Class I
O75382	1	Tripartite motif-containing protein 3 OS=Homo sapiens GN=TRIM3 PE=1 SV=1 - [TRIM3_HUMAN]	O75382	S437	Tripartite motif-containing protein 3 (Brain-expressed RING finger protein) (RING finger protein 22) (RING finger protein 97)	TRIM3 BERP RNF22 RNF97	DVKRRVKSPGGPGSH	CAMK/CAMK2	CaMK2g	VKpSPGGPGSHVR	1	S(3): 100.0; S(9): 0.0	252	Forward	Class I
O75385	1	Serine/threonine-protein kinase ULK1 OS=Homo sapiens GN=ULK1 PE=1 SV=1 - [ULK1_HUMAN]	O75385	S450	Serine/threonine-protein kinase ULK1 (EC 2.7.11.1) (Autophagy-related protein 1 homolog) (ATG1) (hATG1) (Unc-51-like kinase 1)	ULK1 KIAA0722	RIERNLQSPTQFQTP	Atypical/PIKK/FRAP	FRAP	NLQpSPTQFQTPR	1	S(4): 100.0; T(6): 0.0; T(10): 0.0	185	Forward	Class I
O75385	1	Serine/threonine-protein kinase ULK1 OS=Homo sapiens GN=ULK1 PE=1 SV=1 - [ULK1_HUMAN]	O75385	S469	Serine/threonine-protein kinase ULK1 (EC 2.7.11.1) (Autophagy-related protein 1 homolog) (ATG1) (hATG1) (Unc-51-like kinase 1)	ULK1 KIAA0722	IRRSGSTSPLGFARA	Atypical/PIKK/FRAP	FRAP	SGSTpSPLGFAR	1	S(1): 0.0; S(3): 0.0; T(4): 0.8; S(5): 99.2	133	Forward	Class I
O75385	1	Serine/threonine-protein kinase ULK1 OS=Homo sapiens GN=ULK1 PE=1 SV=1 - [ULK1_HUMAN]	O75385	S539	Serine/threonine-protein kinase ULK1 (EC 2.7.11.1) (Autophagy-related protein 1 homolog) (ATG1) (hATG1) (Unc-51-like kinase 1)	ULK1 KIAA0722	RSPRPGSSAPEHSPR			SPRPGSpSAPEHSPR	1	S(1): 0.0; S(6): 0.0; S(7): 100.0; S(12): 0.0	178	Forward	Class I
O75385	1	Serine/threonine-protein kinase ULK1 OS=Homo sapiens GN=ULK1 PE=1 SV=1 - [ULK1_HUMAN]	O75385	S556	Serine/threonine-protein kinase ULK1 (EC 2.7.11.1) (Autophagy-related protein 1 homolog) (ATG1) (hATG1) (Unc-51-like kinase 1)	ULK1 KIAA0722	GLGCRLHSAPNLSDL	CAMK/CAMK2	CaMK2g	LHpSAPNLSDLHVVRPK	1	S(3): 100.0; S(8): 0.0	227	Forward	Class I
O75385	1	Serine/threonine-protein kinase ULK1 OS=Homo sapiens GN=ULK1 PE=1 SV=1 - [ULK1_HUMAN]	O75385	S623	Serine/threonine-protein kinase ULK1 (EC 2.7.11.1) (Autophagy-related protein 1 homolog) (ATG1) (hATG1) (Unc-51-like kinase 1)	ULK1 KIAA0722	PLPPILGSPTKAVPS	Atypical/PIKK/FRAP	FRAP	NPLPPILGpSPTK	1	S(9): 99.3; T(11): 0.7	58	Forward	Class I
O75385	1	Serine/threonine-protein kinase ULK1 OS=Homo sapiens GN=ULK1 PE=1 SV=1 - [ULK1_HUMAN]	O75385	S638	Serine/threonine-protein kinase ULK1 (EC 2.7.11.1) (Autophagy-related protein 1 homolog) (ATG1) (hATG1) (Unc-51-like kinase 1)	ULK1 KIAA0722	FDFPKTPSSQNLLAL			TPpSSQNLLALLAR	1	T(1): 0.2; S(3): 99.6; S(4): 0.2	181	Forward	Class I
O75396	1	Vesicle-trafficking protein SEC22b OS=Homo sapiens GN=SEC22B PE=1 SV=3 - [SC22B_HUMAN]	O75396	S137	Vesicle-trafficking protein SEC22b (ER-Golgi SNARE of 24 kDa) (ERS-24) (ERS24) (SEC22 vesicle-trafficking protein homolog B) (SEC22 vesicle-trafficking protein-like 1)	SEC22B SEC22L1	RARRNLGSINTELQD			NLGpSINTELQDVQR	1	S(4): 100.0; T(7): 0.0	357	Forward	Class I
O75396	1	Vesicle-trafficking protein SEC22b OS=Homo sapiens GN=SEC22B PE=1 SV=3 - [SC22B_HUMAN]	O75396	T140	Vesicle-trafficking protein SEC22b (ER-Golgi SNARE of 24 kDa) (ERS-24) (ERS24) (SEC22 vesicle-trafficking protein homolog B) (SEC22 vesicle-trafficking protein-like 1)	SEC22B SEC22L1	RNLGSINTELQDVQR			NLGSINpTELQDVQR	1	S(4): 2.8; T(7): 97.2	93	Forward	Class I
O75400	1	Pre-mRNA-processing factor 40 homolog A OS=Homo sapiens GN=PRPF40A PE=1 SV=2 - [PR40A_HUMAN]	O75400	S888	Pre-mRNA-processing factor 40 homolog A (Fas ligand-associated factor 1) (Formin-binding protein 11) (Formin-binding protein 3) (Huntingtin yeast partner A) (Huntingtin-interacting protein 10) (HIP-10) (Huntingtin-interacting protein A) (Renal carcinoma antigen NY-REN-6)	PRPF40A FBP11 FLAF1 FNBP3 HIP10 HYPA HSPC225	HKSDSPESDAEREKD	Other/PEK	HRI, PEK, PKR	HKSDSPEpSDAEREK	1	S(3): 0.0; S(5): 0.0; S(8): 100.0	333	Forward	Class I
O75400	1	Pre-mRNA-processing factor 40 homolog A OS=Homo sapiens GN=PRPF40A PE=1 SV=2 - [PR40A_HUMAN]	O75400	S938	Pre-mRNA-processing factor 40 homolog A (Fas ligand-associated factor 1) (Formin-binding protein 11) (Formin-binding protein 3) (Huntingtin yeast partner A) (Huntingtin-interacting protein 10) (HIP-10) (Huntingtin-interacting protein A) (Renal carcinoma antigen NY-REN-6)	PRPF40A FBP11 FLAF1 FNBP3 HIP10 HYPA HSPC225	DTSGSELSEGELEKR	CMGC/DYRK	HIPK1	DSGNWDTSGSELpSEGELEK	1	S(2): 0.0; T(7): 0.0; S(8): 0.0; S(10): 0.0; S(13): 100.0	355	Forward	Class I
O75410	1	Transforming acidic coiled-coil-containing protein 1 OS=Homo sapiens GN=TACC1 PE=1 SV=2 - [TACC1_HUMAN]	O75410	S131	Transforming acidic coiled-coil-containing protein 1 (Gastric cancer antigen Ga55) (Taxin-1)	TACC1 KIAA1103	QQAIDSHSVKNFREE			TCSKPSENEVPQQAIDSHpSVK	1	T(1): 0.0; S(3): 0.0; S(6): 0.0; S(17): 0.8; S(19): 99.2	214	Forward	Class I
O75410	1	Transforming acidic coiled-coil-containing protein 1 OS=Homo sapiens GN=TACC1 PE=1 SV=2 - [TACC1_HUMAN]	O75410	S276	Transforming acidic coiled-coil-containing protein 1 (Gastric cancer antigen Ga55) (Taxin-1)	TACC1 KIAA1103	EELDENTSPLLGDAR	CMGC/CDK	PCTAIRE2	ASYHFSPEELDENTpSPLLGDAR	1	S(2): 0.0; Y(3): 0.0; S(6): 0.0; T(14): 0.4; S(15): 99.6	345	Forward	Class I
O75410	1	Transforming acidic coiled-coil-containing protein 1 OS=Homo sapiens GN=TACC1 PE=1 SV=2 - [TACC1_HUMAN]	O75410	S300	Transforming acidic coiled-coil-containing protein 1 (Gastric cancer antigen Ga55) (Taxin-1)	TACC1 KIAA1103	ETPGTLSSDTNDSGV			ETPGTLSpSDTNDSGVELGEESR	1	T(2): 0.0; T(5): 0.0; S(7): 9.2; S(8): 89.7; T(10): 1.0; S(13): 0.0; S(21): 0.0	96	Forward	Class I
O75420	1	PERQ amino acid-rich with GYF domain-containing protein 1 OS=Homo sapiens GN=GIGYF1 PE=1 SV=2 - [PERQ1_HUMAN]	O75420	S24	PERQ amino acid-rich with GYF domain-containing protein 1 (GRB10-interacting GYF protein 1)	GIGYF1 CDS2 PERQ1 PP3360	SGGGSVASPPPSPAM			ALSGGGSVApSPPPpSPAMPK	2	S(3): 0.0; S(7): 0.0; S(10): 100.0; S(14): 100.0	210	Forward	Class I
O75420	1	PERQ amino acid-rich with GYF domain-containing protein 1 OS=Homo sapiens GN=GIGYF1 PE=1 SV=2 - [PERQ1_HUMAN]	O75420	S28	PERQ amino acid-rich with GYF domain-containing protein 1 (GRB10-interacting GYF protein 1)	GIGYF1 CDS2 PERQ1 PP3360	SVASPPPSPAMPKYK			ALSGGGSVApSPPPpSPAMPK	2	S(3): 0.0; S(7): 0.0; S(10): 100.0; S(14): 100.0	210	Forward	Class I
O75420	1	PERQ amino acid-rich with GYF domain-containing protein 1 OS=Homo sapiens GN=GIGYF1 PE=1 SV=2 - [PERQ1_HUMAN]	O75420	S230	PERQ amino acid-rich with GYF domain-containing protein 1 (GRB10-interacting GYF protein 1)	GIGYF1 CDS2 PERQ1 PP3360	GDRWRSASPDGGPRS			SApSPDGGPRpSAGWR	2	S(1): 0.2; S(3): 99.8; S(10): 100.0	120	Forward	Class I
O75420	1	PERQ amino acid-rich with GYF domain-containing protein 1 OS=Homo sapiens GN=GIGYF1 PE=1 SV=2 - [PERQ1_HUMAN]	O75420	S237	PERQ amino acid-rich with GYF domain-containing protein 1 (GRB10-interacting GYF protein 1)	GIGYF1 CDS2 PERQ1 PP3360	SPDGGPRSAGWREHG			SApSPDGGPRpSAGWR	2	S(1): 0.2; S(3): 99.8; S(10): 100.0	120	Forward	Class I
O75420	1	PERQ amino acid-rich with GYF domain-containing protein 1 OS=Homo sapiens GN=GIGYF1 PE=1 SV=2 - [PERQ1_HUMAN]	O75420	S406	PERQ amino acid-rich with GYF domain-containing protein 1 (GRB10-interacting GYF protein 1)	GIGYF1 CDS2 PERQ1 PP3360	DIRGIQLSPGVGSSA			GIQLpSPGVGSSAGPPGDLEDDEGLK	1	S(5): 100.0; S(10): 0.0; S(11): 0.0	144	Forward	Class I
O75420	1	PERQ amino acid-rich with GYF domain-containing protein 1 OS=Homo sapiens GN=GIGYF1 PE=1 SV=2 - [PERQ1_HUMAN]	O75420	S638	PERQ amino acid-rich with GYF domain-containing protein 1 (GRB10-interacting GYF protein 1)	GIGYF1 CDS2 PERQ1 PP3360	PTMSRSLSVPDSGRL	AGC/AKT	AKT1	SLpSVPDSGR	1	S(1): 0.0; S(3): 100.0; S(7): 0.0	89	Forward	Class I
O75436	1	Vacuolar protein sorting-associated protein 26A OS=Homo sapiens GN=VPS26A PE=1 SV=2 - [VP26A_HUMAN]	O75436	S47	Vacuolar protein sorting-associated protein 26A (Vesicle protein sorting 26A) (hVPS26)	VPS26A VPS26	YLFYDGESVSGKVNL			HYLFYDGEpSVSGK	1	Y(2): 0.0; Y(5): 0.0; S(9): 100.0; S(11): 0.0	138	Forward	Class I
O75445	1	Usherin OS=Homo sapiens GN=USH2A PE=1 SV=3 - [USH2A_HUMAN]	O75445	S3503	Usherin (Usher syndrome type IIa protein) (Usher syndrome type-2A protein)	USH2A	EDVPQGVSPPTWTKI			EDVPQGVpSPPTWTK	1	S(8): 99.7; T(11): 0.3; T(13): 0.0	92	Forward	Class I
O75448	1	Mediator of RNA polymerase II transcription subunit 24 OS=Homo sapiens GN=MED24 PE=1 SV=1 - [MED24_HUMAN]	O75448	S862	Mediator of RNA polymerase II transcription subunit 24 (Activator-recruited cofactor 100 kDa component) (ARC100) (Cofactor required for Sp1 transcriptional activation subunit 4) (CRSP complex subunit 4) (Mediator complex subunit 24) (Thyroid hormone receptor-associated protein 4) (Thyroid hormone receptor-associated protein complex 100 kDa component) (Trap100) (hTRAP100) (Vitamin D3 receptor-inte…	MED24 ARC100 CRSP4 DRIP100 KIAA0130 THRAP4 TRAP100	SKLMRLLSSNEDDAN			LLpSSNEDDANILSSPTDR	1	S(3): 100.0; S(4): 0.0; S(13): 0.0; S(14): 0.0; T(16): 0.0	314	Forward	Class I
O75448	1	Mediator of RNA polymerase II transcription subunit 24 OS=Homo sapiens GN=MED24 PE=1 SV=1 - [MED24_HUMAN]	O75448	S873	Mediator of RNA polymerase II transcription subunit 24 (Activator-recruited cofactor 100 kDa component) (ARC100) (Cofactor required for Sp1 transcriptional activation subunit 4) (CRSP complex subunit 4) (Mediator complex subunit 24) (Thyroid hormone receptor-associated protein 4) (Thyroid hormone receptor-associated protein complex 100 kDa component) (Trap100) (hTRAP100) (Vitamin D3 receptor-inte…	MED24 ARC100 CRSP4 DRIP100 KIAA0130 THRAP4 TRAP100	DDANILSSPTDRSMS	CMGC/CDK	CDK11, CDK8	LLSSNEDDANILSpSPTDR	1	S(3): 0.0; S(4): 0.0; S(13): 0.0; S(14): 100.0; T(16): 0.0	426	Forward	Class I
O75449	1	Katanin p60 ATPase-containing subunit A1 OS=Homo sapiens GN=KATNA1 PE=1 SV=1 - [KTNA1_HUMAN]	O75449	S170	Katanin p60 ATPase-containing subunit A1 (Katanin p60 subunit A1) (EC 3.6.4.3) (p60 katanin)	KATNA1	GREEKNKSPAAVTEP			NKpSPAAVTEPETNKFDSTGYDK	1	S(3): 97.8; T(8): 2.2; T(12): 0.1; S(17): 0.0; T(18): 0.0; Y(20): 0.0	188	Forward	Class I
O75475	1	PC4 and SFRS1-interacting protein OS=Homo sapiens GN=PSIP1 PE=1 SV=1 - [PSIP1_HUMAN]	O75475	S105	PC4 and SFRS1-interacting protein (CLL-associated antigen KW-7) (Dense fine speckles 70 kDa protein) (DFS 70) (Lens epithelium-derived growth factor) (Transcriptional coactivator p75/p52)	PSIP1 DFS70 LEDGF PSIP2	ATKQSNASSDVEVEE	STE/STE20	NRK	QSNApSSDVEVEEK	1	S(2): 0.0; S(5): 99.4; S(6): 0.6	179	Forward	Class I
O75475	1	PC4 and SFRS1-interacting protein OS=Homo sapiens GN=PSIP1 PE=1 SV=1 - [PSIP1_HUMAN]	O75475	S106	PC4 and SFRS1-interacting protein (CLL-associated antigen KW-7) (Dense fine speckles 70 kDa protein) (DFS 70) (Lens epithelium-derived growth factor) (Transcriptional coactivator p75/p52)	PSIP1 DFS70 LEDGF PSIP2	TKQSNASSDVEVEEK	STE/STE20	NRK	QSNASpSDVEVEEKETSVSK	1	S(2): 0.0; S(5): 0.0; S(6): 100.0; T(15): 0.0; S(16): 0.0; S(18): 0.0	390	Forward	Class I
O75475	1	PC4 and SFRS1-interacting protein OS=Homo sapiens GN=PSIP1 PE=1 SV=1 - [PSIP1_HUMAN]	O75475	T122	PC4 and SFRS1-interacting protein (CLL-associated antigen KW-7) (Dense fine speckles 70 kDa protein) (DFS 70) (Lens epithelium-derived growth factor) (Transcriptional coactivator p75/p52)	PSIP1 DFS70 LEDGF PSIP2	TSVSKEDTDHEEKAS			ETSVSKEDpTDHEEK	1	T(2): 0.0; S(3): 0.0; S(5): 0.0; T(9): 100.0	340	Forward	Class I
O75475	1	PC4 and SFRS1-interacting protein OS=Homo sapiens GN=PSIP1 PE=1 SV=1 - [PSIP1_HUMAN]	O75475	S129	PC4 and SFRS1-interacting protein (CLL-associated antigen KW-7) (Dense fine speckles 70 kDa protein) (DFS 70) (Lens epithelium-derived growth factor) (Transcriptional coactivator p75/p52)	PSIP1 DFS70 LEDGF PSIP2	TDHEEKASNEDVTKA			ETSVSKEDTDHEEKApSNEDVTK	1	T(2): 0.0; S(3): 0.0; S(5): 0.0; T(9): 0.0; S(16): 100.0; T(21): 0.0	241	Forward	Class I
O75475	1	PC4 and SFRS1-interacting protein OS=Homo sapiens GN=PSIP1 PE=1 SV=1 - [PSIP1_HUMAN]	O75475	T141	PC4 and SFRS1-interacting protein (CLL-associated antigen KW-7) (Dense fine speckles 70 kDa protein) (DFS 70) (Lens epithelium-derived growth factor) (Transcriptional coactivator p75/p52)	PSIP1 DFS70 LEDGF PSIP2	TKAVDITTPKAARRG	CMGC/MAPK	Erk1, Erk2	AVDITpTPK	1	T(5): 1.6; T(6): 98.4	126	Forward	Class I
O75475	1	PC4 and SFRS1-interacting protein OS=Homo sapiens GN=PSIP1 PE=1 SV=1 - [PSIP1_HUMAN]	O75475	S206	PC4 and SFRS1-interacting protein (CLL-associated antigen KW-7) (Dense fine speckles 70 kDa protein) (DFS 70) (Lens epithelium-derived growth factor) (Transcriptional coactivator p75/p52)	PSIP1 DFS70 LEDGF PSIP2	MVKQPCPSESDIITE			QPCPpSESDIITEEDK	1	S(5): 100.0; S(7): 0.0; T(11): 0.0	196	Forward	Class I
O75475	1	PC4 and SFRS1-interacting protein OS=Homo sapiens GN=PSIP1 PE=1 SV=1 - [PSIP1_HUMAN]	O75475	S514	PC4 and SFRS1-interacting protein (CLL-associated antigen KW-7) (Dense fine speckles 70 kDa protein) (DFS 70) (Lens epithelium-derived growth factor) (Transcriptional coactivator p75/p52)	PSIP1 DFS70 LEDGF PSIP2	STKKKPSSEERETEI	AGC/PKC	PKCg	KKPSpSEERETEISLK	1	S(4): 0.0; S(5): 100.0; T(10): 0.0; S(13): 0.0	325	Forward	Class I
O75494	1	FUS-interacting serine-arginine-rich protein 1 OS=Homo sapiens GN=FUSIP1 PE=1 SV=1 - [FUSIP_HUMAN]	O75494	S23	Serine/arginine-rich splicing factor 10 (40 kDa SR-repressor protein) (SRrp40) (FUS-interacting serine-arginine-rich protein 1) (Splicing factor SRp38) (Splicing factor, arginine/serine-rich 13A) (TLS-associated protein with Ser-Arg repeats) (TASR) (TLS-associated protein with SR repeats) (TLS-associated serine-arginine protein) (TLS-associated SR protein)	SRSF10 FUSIP1 FUSIP2 SFRS13A TASR	NVADDTRSEDLRREF			NVADDTRpSEDLRR	1	T(6): 0.0; S(8): 100.0	357	Forward	Class I
O75494	1	FUS-interacting serine-arginine-rich protein 1 OS=Homo sapiens GN=FUSIP1 PE=1 SV=1 - [FUSIP_HUMAN]	O75494	S106	Serine/arginine-rich splicing factor 10 (40 kDa SR-repressor protein) (SRrp40) (FUS-interacting serine-arginine-rich protein 1) (Splicing factor SRp38) (Splicing factor, arginine/serine-rich 13A) (TLS-associated protein with Ser-Arg repeats) (TASR) (TLS-associated protein with SR repeats) (TLS-associated serine-arginine protein) (TLS-associated SR protein)	SRSF10 FUSIP1 FUSIP2 SFRS13A TASR	KEGRNVYSSSRYDDY			NVYpSSSRYDDYDR	1	Y(3): 0.0; S(4): 100.0; S(5): 0.0; S(6): 0.0; Y(8): 0.0; Y(11): 0.0	344	Forward	Class I
O75494	1	FUS-interacting serine-arginine-rich protein 1 OS=Homo sapiens GN=FUSIP1 PE=1 SV=1 - [FUSIP_HUMAN]	O75494	S131	Serine/arginine-rich splicing factor 10 (40 kDa SR-repressor protein) (SRrp40) (FUS-interacting serine-arginine-rich protein 1) (Splicing factor SRp38) (Splicing factor, arginine/serine-rich 13A) (TLS-associated protein with Ser-Arg repeats) (TASR) (TLS-associated protein with SR repeats) (TLS-associated serine-arginine protein) (TLS-associated SR protein)	SRSF10 FUSIP1 FUSIP2 SFRS13A TASR	YERRRSRSRSFDYNY	AGC/PKC	PKCb	pSRpSFDYNYRR	2	S(1): 100.0; S(3): 100.0; Y(6): 0.0; Y(8): 0.0	183	Forward	Class I
O75494	1	FUS-interacting serine-arginine-rich protein 1 OS=Homo sapiens GN=FUSIP1 PE=1 SV=1 - [FUSIP_HUMAN]	O75494	S133	Serine/arginine-rich splicing factor 10 (40 kDa SR-repressor protein) (SRrp40) (FUS-interacting serine-arginine-rich protein 1) (Splicing factor SRp38) (Splicing factor, arginine/serine-rich 13A) (TLS-associated protein with Ser-Arg repeats) (TASR) (TLS-associated protein with SR repeats) (TLS-associated serine-arginine protein) (TLS-associated SR protein)	SRSF10 FUSIP1 FUSIP2 SFRS13A TASR	RRRSRSRSFDYNYRR	AGC/PKC	PKCb	SRpSFDYNYRR	1	S(1): 0.0; S(3): 100.0; Y(6): 0.0; Y(8): 0.0	221	Forward	Class I
O75494	1	FUS-interacting serine-arginine-rich protein 1 OS=Homo sapiens GN=FUSIP1 PE=1 SV=1 - [FUSIP_HUMAN]	O75494	S256	Serine/arginine-rich splicing factor 10 (40 kDa SR-repressor protein) (SRrp40) (FUS-interacting serine-arginine-rich protein 1) (Splicing factor SRp38) (Splicing factor, arginine/serine-rich 13A) (TLS-associated protein with Ser-Arg repeats) (TASR) (TLS-associated protein with SR repeats) (TLS-associated serine-arginine protein) (TLS-associated SR protein)	SRSF10 FUSIP1 FUSIP2 SFRS13A TASR	SRSRSWTSPKSSGH*	AGC/PKC	PKCb	SWTpSPK	1	S(1): 0.0; T(3): 3.1; S(4): 96.9	69	Forward	Class I
O75508	1	Claudin-11 OS=Homo sapiens GN=CLDN11 PE=1 SV=2 - [CLD11_HUMAN]	O75508	S196	Claudin-11 (Oligodendrocyte-specific protein)	CLDN11 OSP OTM	RFYYTAGSSSPTHAK			FYYTAGpSSSPTHAK	1	Y(2): 0.0; Y(3): 0.0; T(4): 0.0; S(7): 98.8; S(8): 0.6; S(9): 0.6; T(11): 0.0	200	Forward	Class I
O75508	1	Claudin-11 OS=Homo sapiens GN=CLDN11 PE=1 SV=2 - [CLD11_HUMAN]	O75508	S198	Claudin-11 (Oligodendrocyte-specific protein)	CLDN11 OSP OTM	YYTAGSSSPTHAKSA	STE/STE11	MAP3K2	FYYTAGSSpSPTHAK	1	Y(2): 0.0; Y(3): 0.0; T(4): 0.0; S(7): 0.0; S(8): 0.0; S(9): 99.9; T(11): 0.1	335	Forward	Class I
O75533	1	Splicing factor 3B subunit 1 OS=Homo sapiens GN=SF3B1 PE=1 SV=2 - [SF3B1_HUMAN]	O75533	S129	Splicing factor 3B subunit 1 (Pre-mRNA-splicing factor SF3b 155 kDa subunit) (SF3b155) (Spliceosome-associated protein 155) (SAP 155)	SF3B1 SAP155	HRRTMIISPERLDPF	CMGC/DYRK	DYRK1A, DYRK1B	TMIIpSPERLDPFADGGKpTPDPK	2	T(1): 0.0; S(5): 100.0; T(18): 100.0	224	Forward	Class I
O75533	1	Splicing factor 3B subunit 1 OS=Homo sapiens GN=SF3B1 PE=1 SV=2 - [SF3B1_HUMAN]	O75533	T142	Splicing factor 3B subunit 1 (Pre-mRNA-splicing factor SF3b 155 kDa subunit) (SF3b155) (Spliceosome-associated protein 155) (SAP 155)	SF3B1 SAP155	PFADGGKTPDPKMNV			LDPFADGGKpTPDPK	1	T(10): 100.0	320	Forward	Class I
O75533	1	Splicing factor 3B subunit 1 OS=Homo sapiens GN=SF3B1 PE=1 SV=2 - [SF3B1_HUMAN]	O75533	S190	Splicing factor 3B subunit 1 (Pre-mRNA-splicing factor SF3b 155 kDa subunit) (SF3b155) (Spliceosome-associated protein 155) (SAP 155)	SF3B1 SAP155	VVNGAAASQPPSKRK			VVNGAAApSQPPpSK	2	S(8): 100.0; S(12): 100.0	235	Forward	Class I
O75533	1	Splicing factor 3B subunit 1 OS=Homo sapiens GN=SF3B1 PE=1 SV=2 - [SF3B1_HUMAN]	O75533	S194	Splicing factor 3B subunit 1 (Pre-mRNA-splicing factor SF3b 155 kDa subunit) (SF3b155) (Spliceosome-associated protein 155) (SAP 155)	SF3B1 SAP155	AAASQPPSKRKRRWD	CMGC/DYRK	DYRK1A, DYRK1B	VVNGAAASQPPpSK	1	S(8): 0.0; S(12): 100.0	245	Forward	Class I
O75533	1	Splicing factor 3B subunit 1 OS=Homo sapiens GN=SF3B1 PE=1 SV=2 - [SF3B1_HUMAN]	O75533	T207	Splicing factor 3B subunit 1 (Pre-mRNA-splicing factor SF3b 155 kDa subunit) (SF3b155) (Spliceosome-associated protein 155) (SAP 155)	SF3B1 SAP155	WDQTADQTPGATPKK	CMGC/CDK/CDC2	CDK2	WDQTADQpTPGApTPK	2	T(4): 0.0; T(8): 100.0; T(12): 100.0	244	Forward	Class I
O75533	1	Splicing factor 3B subunit 1 OS=Homo sapiens GN=SF3B1 PE=1 SV=2 - [SF3B1_HUMAN]	O75533	T211	Splicing factor 3B subunit 1 (Pre-mRNA-splicing factor SF3b 155 kDa subunit) (SF3b155) (Spliceosome-associated protein 155) (SAP 155)	SF3B1 SAP155	ADQTPGATPKKLSSW	CMGC/CDK/CDC2	CDK2	RRWDQTADQTPGApTPK	1	T(6): 0.0; T(10): 0.0; T(14): 100.0	331	Forward	Class I
O75533	1	Splicing factor 3B subunit 1 OS=Homo sapiens GN=SF3B1 PE=1 SV=2 - [SF3B1_HUMAN]	O75533	T223	Splicing factor 3B subunit 1 (Pre-mRNA-splicing factor SF3b 155 kDa subunit) (SF3b155) (Spliceosome-associated protein 155) (SAP 155)	SF3B1 SAP155	SSWDQAETPGHTPSL	CMGC/CDK/CDC2	CDK2	KLSSWDQAEpTPGHpTPSLR	2	S(3): 0.0; S(4): 0.0; T(10): 100.0; T(14): 100.0; S(16): 0.0	325	Forward	Class I
O75533	1	Splicing factor 3B subunit 1 OS=Homo sapiens GN=SF3B1 PE=1 SV=2 - [SF3B1_HUMAN]	O75533	T227	Splicing factor 3B subunit 1 (Pre-mRNA-splicing factor SF3b 155 kDa subunit) (SF3b155) (Spliceosome-associated protein 155) (SAP 155)	SF3B1 SAP155	QAETPGHTPSLRWDE	CMGC/CDK/CDC2	CDK2	KLSSWDQAEpTPGHpTPSLR	2	S(3): 0.0; S(4): 0.0; T(10): 100.0; T(14): 100.0; S(16): 0.0	325	Forward	Class I
O75533	1	Splicing factor 3B subunit 1 OS=Homo sapiens GN=SF3B1 PE=1 SV=2 - [SF3B1_HUMAN]	O75533	T235	Splicing factor 3B subunit 1 (Pre-mRNA-splicing factor SF3b 155 kDa subunit) (SF3b155) (Spliceosome-associated protein 155) (SAP 155)	SF3B1 SAP155	PSLRWDETPGRAKGS	CMGC/CDK/CDC2	CDK2	WDEpTPGR	1	T(4): 100.0	62	Forward	Class I
O75533	1	Splicing factor 3B subunit 1 OS=Homo sapiens GN=SF3B1 PE=1 SV=2 - [SF3B1_HUMAN]	O75533	T296	Splicing factor 3B subunit 1 (Pre-mRNA-splicing factor SF3b 155 kDa subunit) (SF3b155) (Spliceosome-associated protein 155) (SAP 155)	SF3B1 SAP155	RKNRWDETPKTERDT	CMGC/CDK/CDC2	CDK2	NRWDEpTPKTER	1	T(6): 100.0; T(9): 0.0	254	Forward	Class I
O75533	1	Splicing factor 3B subunit 1 OS=Homo sapiens GN=SF3B1 PE=1 SV=2 - [SF3B1_HUMAN]	O75533	T313	Splicing factor 3B subunit 1 (Pre-mRNA-splicing factor SF3b 155 kDa subunit) (SF3b155) (Spliceosome-associated protein 155) (SAP 155)	SF3B1 SAP155	HGSGWAETPRTDRGG	CMGC/CDK/CDC2	CDK2	DTPGHGSGWAEpTPRTDR	1	T(2): 0.0; S(7): 0.0; T(12): 100.0; T(15): 0.0	187	Forward	Class I
O75533	1	Splicing factor 3B subunit 1 OS=Homo sapiens GN=SF3B1 PE=1 SV=2 - [SF3B1_HUMAN]	O75533	T326	Splicing factor 3B subunit 1 (Pre-mRNA-splicing factor SF3b 155 kDa subunit) (SF3b155) (Spliceosome-associated protein 155) (SAP 155)	SF3B1 SAP155	GGDSIGETPTPGASK	CMGC/CDK/CDC2	CDK2	GGDSIGEpTPTPGASK	1	S(4): 0.0; T(8): 100.0; T(10): 0.0; S(14): 0.0	140	Forward	Class I
O75533	1	Splicing factor 3B subunit 1 OS=Homo sapiens GN=SF3B1 PE=1 SV=2 - [SF3B1_HUMAN]	O75533	T341	Splicing factor 3B subunit 1 (Pre-mRNA-splicing factor SF3b 155 kDa subunit) (SF3b155) (Spliceosome-associated protein 155) (SAP 155)	SF3B1 SAP155	RKSRWDETPASQMGG	CMGC/CDK/CDC2	CDK2	SRWDEpTPASQMGGpSTPVLTPGK	2	S(1): 0.4; T(6): 99.2; S(9): 33.5; S(14): 33.5; T(15): 33.5; T(19): 0.0	100	Forward	Class I
O75533	1	Splicing factor 3B subunit 1 OS=Homo sapiens GN=SF3B1 PE=1 SV=2 - [SF3B1_HUMAN]	O75533	T350	Splicing factor 3B subunit 1 (Pre-mRNA-splicing factor SF3b 155 kDa subunit) (SF3b155) (Spliceosome-associated protein 155) (SAP 155)	SF3B1 SAP155	ASQMGGSTPVLTPGK	CMGC/DYRK	DYRK1A, DYRK1B	SRWDETPASQMGGSpTPVLTPGK	1	S(1): 0.0; T(6): 0.0; S(9): 0.0; S(14): 0.6; T(15): 99.4; T(19): 0.0	342	Forward	Class I
O75533	1	Splicing factor 3B subunit 1 OS=Homo sapiens GN=SF3B1 PE=1 SV=2 - [SF3B1_HUMAN]	O75533	T426	Splicing factor 3B subunit 1 (Pre-mRNA-splicing factor SF3b 155 kDa subunit) (SF3b155) (Spliceosome-associated protein 155) (SAP 155)	SF3B1 SAP155	AGYVPIRTPARKLTA			VLPPPAGYVPIRpTPAR	1	Y(8): 0.0; T(13): 100.0	134	Forward	Class I
O75569	1	Interferon-inducible double stranded RNA-dependent protein kinase activator A OS=Homo sapiens GN=PRKRA PE=1 SV=1 - [PRKRA_HUMAN]	O75569	S18	Interferon-inducible double stranded RNA-dependent protein kinase activator A (PKR-associated protein X) (PKR-associating protein X) (Protein activator of the interferon-induced protein kinase) (Protein kinase, interferon-inducible double stranded RNA-dependent activator)	PRKRA PACT RAX HSD-14 HSD14	PPLEREDSGTFSLGK	Other/NEK	NEK1	AEAPPLEREDpSGTFSLGK	1	S(11): 100.0; T(13): 0.0; S(15): 0.0	352	Forward	Class I
O75592	1	Probable E3 ubiquitin-protein ligase MYCBP2 OS=Homo sapiens GN=MYCBP2 PE=1 SV=3 - [MYCB2_HUMAN]	O75592	T2645	Probable E3 ubiquitin-protein ligase MYCBP2 (EC 6.3.2.-) (Myc-binding protein 2) (Pam/highwire/rpm-1 protein) (Protein associated with Myc)	MYCBP2 KIAA0916 PAM	LLDQNSQTPPPSPFS	Atypical/PIKK/FRAP	FRAP	HEDEQALLDQNSQpTPPPSPFSVQAFNK	1	S(12): 0.0; T(14): 100.0; S(18): 0.0; S(21): 0.0	366	Forward	Class I
O75592	1	Probable E3 ubiquitin-protein ligase MYCBP2 OS=Homo sapiens GN=MYCBP2 PE=1 SV=3 - [MYCB2_HUMAN]	O75592	S2751	Probable E3 ubiquitin-protein ligase MYCBP2 (EC 6.3.2.-) (Myc-binding protein 2) (Pam/highwire/rpm-1 protein) (Protein associated with Myc)	MYCBP2 KIAA0916 PAM	DSHSRSLSPNHNTLQ	Atypical/PIKK/FRAP	FRAP	SLpSPNHNTLQTLK	1	S(1): 0.0; S(3): 100.0; T(8): 0.0; T(11): 0.0	319	Forward	Class I
O75592	1	Probable E3 ubiquitin-protein ligase MYCBP2 OS=Homo sapiens GN=MYCBP2 PE=1 SV=3 - [MYCB2_HUMAN]	O75592	S2774	Probable E3 ubiquitin-protein ligase MYCBP2 (EC 6.3.2.-) (Myc-binding protein 2) (Pam/highwire/rpm-1 protein) (Protein associated with Myc)	MYCBP2 KIAA0916 PAM	PSSSRAESPGPGSRL	Atypical/PIKK/FRAP	FRAP	MPSSSRAEpSPGPGSR	1	S(3): 0.0; S(4): 0.0; S(5): 0.0; S(9): 100.0; S(14): 0.0	313	Forward	Class I
O75592	1	Probable E3 ubiquitin-protein ligase MYCBP2 OS=Homo sapiens GN=MYCBP2 PE=1 SV=3 - [MYCB2_HUMAN]	O75592	S2795	Probable E3 ubiquitin-protein ligase MYCBP2 (EC 6.3.2.-) (Myc-binding protein 2) (Pam/highwire/rpm-1 protein) (Protein associated with Myc)	MYCBP2 KIAA0916 PAM	TLPANRSSPSGASSP			TLPANRSpSPSGASpSPR	2	T(1): 0.0; S(7): 8.5; S(8): 83.0; S(10): 8.5; S(13): 9.4; S(14): 90.6	97	Forward	Class I
O75592	1	Probable E3 ubiquitin-protein ligase MYCBP2 OS=Homo sapiens GN=MYCBP2 PE=1 SV=3 - [MYCB2_HUMAN]	O75592	S2801	Probable E3 ubiquitin-protein ligase MYCBP2 (EC 6.3.2.-) (Myc-binding protein 2) (Pam/highwire/rpm-1 protein) (Protein associated with Myc)	MYCBP2 KIAA0916 PAM	SSPSGASSPRSSSPH			TLPANRSpSPSGASpSPR	2	T(1): 0.0; S(7): 8.5; S(8): 83.0; S(10): 8.5; S(13): 9.4; S(14): 90.6	97	Forward	Class I
O75592	1	Probable E3 ubiquitin-protein ligase MYCBP2 OS=Homo sapiens GN=MYCBP2 PE=1 SV=3 - [MYCB2_HUMAN]	O75592	S2831	Probable E3 ubiquitin-protein ligase MYCBP2 (EC 6.3.2.-) (Myc-binding protein 2) (Pam/highwire/rpm-1 protein) (Protein associated with Myc)	MYCBP2 KIAA0916 PAM	LDPPRERSKSDSYTL	AGC/AKT	AKT1	pSKSDSYTLDPDTLRK	1	S(1): 99.5; S(3): 0.5; S(5): 0.0; Y(6): 0.0; T(7): 0.0; T(12): 0.0	256	Forward	Class I
O75592	1	Probable E3 ubiquitin-protein ligase MYCBP2 OS=Homo sapiens GN=MYCBP2 PE=1 SV=3 - [MYCB2_HUMAN]	O75592	S2833	Probable E3 ubiquitin-protein ligase MYCBP2 (EC 6.3.2.-) (Myc-binding protein 2) (Pam/highwire/rpm-1 protein) (Protein associated with Myc)	MYCBP2 KIAA0916 PAM	PPRERSKSDSYTLDP	AGC/AKT	AKT1	SKpSDSYTLDPDTLRK	1	S(1): 0.2; S(3): 99.8; S(5): 0.0; Y(6): 0.0; T(7): 0.0; T(12): 0.0	291	Forward	Class I
O75592	1	Probable E3 ubiquitin-protein ligase MYCBP2 OS=Homo sapiens GN=MYCBP2 PE=1 SV=3 - [MYCB2_HUMAN]	O75592	S2947	Probable E3 ubiquitin-protein ligase MYCBP2 (EC 6.3.2.-) (Myc-binding protein 2) (Pam/highwire/rpm-1 protein) (Protein associated with Myc)	MYCBP2 KIAA0916 PAM	DEQEMRASPKISRKC			APLKDEQEMRApSPK	1	S(12): 100.0	343	Forward	Class I
O75592	1	Probable E3 ubiquitin-protein ligase MYCBP2 OS=Homo sapiens GN=MYCBP2 PE=1 SV=3 - [MYCB2_HUMAN]	O75592	S3438	Probable E3 ubiquitin-protein ligase MYCBP2 (EC 6.3.2.-) (Myc-binding protein 2) (Pam/highwire/rpm-1 protein) (Protein associated with Myc)	MYCBP2 KIAA0916 PAM	KRTVFQRSYSVVASE			pSYSVVASEYDK	1	S(1): 99.3; Y(2): 0.3; S(3): 0.3; S(7): 0.0; Y(9): 0.0	198	Forward	Class I
O75592	1	Probable E3 ubiquitin-protein ligase MYCBP2 OS=Homo sapiens GN=MYCBP2 PE=1 SV=3 - [MYCB2_HUMAN]	O75592	S3440	Probable E3 ubiquitin-protein ligase MYCBP2 (EC 6.3.2.-) (Myc-binding protein 2) (Pam/highwire/rpm-1 protein) (Protein associated with Myc)	MYCBP2 KIAA0916 PAM	TVFQRSYSVVASEYD	AGC/AKT	AKT1	SYpSVVASEYDK	1	S(1): 0.5; Y(2): 0.5; S(3): 99.1; S(7): 0.0; Y(9): 0.0	153	Forward	Class I
O75592	1	Probable E3 ubiquitin-protein ligase MYCBP2 OS=Homo sapiens GN=MYCBP2 PE=1 SV=3 - [MYCB2_HUMAN]	O75592	S3467	Probable E3 ubiquitin-protein ligase MYCBP2 (EC 6.3.2.-) (Myc-binding protein 2) (Pam/highwire/rpm-1 protein) (Protein associated with Myc)	MYCBP2 KIAA0916 PAM	IPRRRVNSGDTEVGS	AGC/AKT	AKT1	RRVNpSGDTEVGSSLLR	1	S(5): 100.0; T(8): 0.0; S(12): 0.0; S(13): 0.0	361	Forward	Class I
O75607	1	Nucleoplasmin-3 OS=Homo sapiens GN=NPM3 PE=1 SV=3 - [NPM3_HUMAN]	O75607	S126	Nucleoplasmin-3	NPM3	PVTFRLKSGSGPVRI			pSGSGPVRITGR	1	S(1): 100.0; S(3): 0.0; T(9): 0.0	52	Forward	Class I
O75676	1	Ribosomal protein S6 kinase alpha-4 OS=Homo sapiens GN=RPS6KA4 PE=1 SV=1 - [KS6A4_HUMAN]	O75676	S347	Ribosomal protein S6 kinase alpha-4 (S6K-alpha-4) (EC 2.7.11.1) (90 kDa ribosomal protein S6 kinase 4) (Nuclear mitogen- and stress-activated protein kinase 2) (Ribosomal protein kinase B) (RSKB)	RPS6KA4 MSK2	PVYSPPGSPPPGDPR	Atypical/PIKK/FRAP	FRAP	LEPVYSPPGpSPPPGDPR	1	Y(5): 0.0; S(6): 0.0; S(10): 100.0	160	Forward	Class I
O75676	1	Ribosomal protein S6 kinase alpha-4 OS=Homo sapiens GN=RPS6KA4 PE=1 SV=1 - [KS6A4_HUMAN]	O75676	S681	Ribosomal protein S6 kinase alpha-4 (S6K-alpha-4) (EC 2.7.11.1) (90 kDa ribosomal protein S6 kinase 4) (Nuclear mitogen- and stress-activated protein kinase 2) (Ribosomal protein kinase B) (RSKB)	RPS6KA4 MSK2	LQDGSARSSPPLRTP	TKL/RAF	RAF1	pSSPPLRTPDVLESSGPAVR	1	S(1): 92.4; S(2): 7.6; T(7): 0.0; S(13): 0.0; S(14): 0.0	214	Forward	Class I
O75676	1	Ribosomal protein S6 kinase alpha-4 OS=Homo sapiens GN=RPS6KA4 PE=1 SV=1 - [KS6A4_HUMAN]	O75676	S682	Ribosomal protein S6 kinase alpha-4 (S6K-alpha-4) (EC 2.7.11.1) (90 kDa ribosomal protein S6 kinase 4) (Nuclear mitogen- and stress-activated protein kinase 2) (Ribosomal protein kinase B) (RSKB)	RPS6KA4 MSK2	QDGSARSSPPLRTPD	Atypical/PIKK/FRAP	FRAP	SpSPPLRTPDVLESSGPAVR	1	S(1): 8.2; S(2): 91.8; T(7): 0.0; S(13): 0.0; S(14): 0.0	210	Forward	Class I
O75683	1	Surfeit locus protein 6 OS=Homo sapiens GN=SURF6 PE=1 SV=3 - [SURF6_HUMAN]	O75683	S138	Surfeit locus protein 6	SURF6 SURF-6	QGSAKELSPAALEKR			ELpSPAALEK	1	S(3): 100.0	165	Forward	Class I
O75691	1	Small subunit processome component 20 homolog OS=Homo sapiens GN=UTP20 PE=1 SV=1 - [UTP20_HUMAN]	O75691	T1741	Small subunit processome component 20 homolog (Down-regulated in metastasis protein) (Novel nucleolar protein 73) (NNP73) (Protein Key-1A6)	UTP20 DRIM	SDNGQPGTPDPADSG			SLSDNGQPGpTPDPADSGGTSAK	1	S(1): 0.0; S(3): 0.0; T(10): 100.0; S(16): 0.0; T(19): 0.0; S(20): 0.0	363	Forward	Class I
O75694	1	Nuclear pore complex protein Nup155 OS=Homo sapiens GN=NUP155 PE=1 SV=1 - [NU155_HUMAN]	O75694	S992	Nuclear pore complex protein Nup155 (155 kDa nucleoporin) (Nucleoporin Nup155)	NUP155 KIAA0791	QSKAAPQSPSVPKKP	CMGC/CDK	CDK4	AAPQpSPSVPK	1	S(5): 100.0; S(7): 0.0	101	Forward	Class I
O75717	1	WD repeat and HMG-box DNA-binding protein 1 OS=Homo sapiens GN=WDHD1 PE=1 SV=1 - [WDHD1_HUMAN]	O75717	S383	WD repeat and HMG-box DNA-binding protein 1 (Acidic nucleoplasmic DNA-binding protein 1) (And-1)	WDHD1 AND1	ILEDDENSVDISMLK			SHILEDDENpSVDISMLK	1	S(1): 0.0; S(10): 100.0; S(14): 0.0	413	Forward	Class I
O75717	1	WD repeat and HMG-box DNA-binding protein 1 OS=Homo sapiens GN=WDHD1 PE=1 SV=1 - [WDHD1_HUMAN]	O75717	S868	WD repeat and HMG-box DNA-binding protein 1 (Acidic nucleoplasmic DNA-binding protein 1) (And-1)	WDHD1 AND1	VEEDAEDSGEADDEE	CMGC/MAPK	Erk2	NQVEEDAEDpSGEADDEEKPEIHKPGQNSFSK	1	S(10): 99.5; S(28): 0.4; S(30): 0.1	34	Forward	Class I
O75781	1	Paralemmin OS=Homo sapiens GN=PALM PE=1 SV=2 - [PALM_HUMAN]	O75781	S116	Paralemmin-1 (Paralemmin)	PALM KIAA0270	KENAAAPSPVRAPAP			ENAAAPpSPVRAPAPSPAK	1	S(7): 100.0; S(15): 0.0	274	Forward	Class I
O75781	1	Paralemmin OS=Homo sapiens GN=PALM PE=1 SV=2 - [PALM_HUMAN]	O75781	S124	Paralemmin-1 (Paralemmin)	PALM KIAA0270	PVRAPAPSPAKEERK			APAPpSPAKEER	1	S(5): 100.0	141	Forward	Class I
O75781	1	Paralemmin OS=Homo sapiens GN=PALM PE=1 SV=2 - [PALM_HUMAN]	O75781	T141	Paralemmin-1 (Paralemmin)	PALM KIAA0270	VVMNSQQTPVGTPKD			KTEVVMNSQQpTPVGTPK	1	T(2): 0.0; S(8): 0.0; T(11): 100.0; T(15): 0.0	394	Forward	Class I
O75781	1	Paralemmin OS=Homo sapiens GN=PALM PE=1 SV=2 - [PALM_HUMAN]	O75781	T145	Paralemmin-1 (Paralemmin)	PALM KIAA0270	SQQTPVGTPKDKRVS			KTEVVMNSQQTPVGpTPK	1	T(2): 0.0; S(8): 0.0; T(11): 0.0; T(15): 100.0	402	Forward	Class I
O75808	1	Calpain-15 OS=Homo sapiens GN=SOLH PE=2 SV=1 - [CAN15_HUMAN]	O75808	S296	Calpain-15 (EC 3.4.22.-) (Small optic lobes homolog)	SOLH CAPN15	LLSGKRLSVLEEEAT			RLpSVLEEEATEGGTSR	1	S(3): 100.0; T(10): 0.0; T(14): 0.0; S(15): 0.0	318	Forward	Class I
O75815	1	Breast cancer anti-estrogen resistance protein 3 OS=Homo sapiens GN=BCAR3 PE=1 SV=1 - [BCAR3_HUMAN]	O75815	S8	Breast cancer anti-estrogen resistance protein 3 (Novel SH2-containing protein 2) (SH2 domain-containing protein 3B)	BCAR3 NSP2 SH2D3B UNQ271/PRO308	MAAGKFASLPRNMPV			FApSLPR	1	S(3): 100.0	83	Forward	Class I
O75815	1	Breast cancer anti-estrogen resistance protein 3 OS=Homo sapiens GN=BCAR3 PE=1 SV=1 - [BCAR3_HUMAN]	O75815	S83	Breast cancer anti-estrogen resistance protein 3 (Novel SH2-containing protein 2) (SH2 domain-containing protein 3B)	BCAR3 NSP2 SH2D3B UNQ271/PRO308	SKSPRQNSPVTQDGI	CAMK/MAPKAPK	MAPKAPK3	QNpSPVTQDGIQESPWQDR	1	S(3): 100.0; T(6): 0.0; S(13): 0.0	290	Forward	Class I
O75815	1	Breast cancer anti-estrogen resistance protein 3 OS=Homo sapiens GN=BCAR3 PE=1 SV=1 - [BCAR3_HUMAN]	O75815	T86	Breast cancer anti-estrogen resistance protein 3 (Novel SH2-containing protein 2) (SH2 domain-containing protein 3B)	BCAR3 NSP2 SH2D3B UNQ271/PRO308	PRQNSPVTQDGIQES			QNSPVpTQDGIQESPWQDR	1	S(3): 7.3; T(6): 92.7; S(13): 0.0	94	Forward	Class I
O75815	1	Breast cancer anti-estrogen resistance protein 3 OS=Homo sapiens GN=BCAR3 PE=1 SV=1 - [BCAR3_HUMAN]	O75815	S290	Breast cancer anti-estrogen resistance protein 3 (Novel SH2-containing protein 2) (SH2 domain-containing protein 3B)	BCAR3 NSP2 SH2D3B UNQ271/PRO308	PDVAKRLSLTMGGVQ	CAMK/MAPKAPK	MAPKAPK3	RLpSLTMGGVQAR	1	S(3): 100.0; T(5): 0.0	270	Forward	Class I
O75815	1	Breast cancer anti-estrogen resistance protein 3 OS=Homo sapiens GN=BCAR3 PE=1 SV=1 - [BCAR3_HUMAN]	O75815	S370	Breast cancer anti-estrogen resistance protein 3 (Novel SH2-containing protein 2) (SH2 domain-containing protein 3B)	BCAR3 NSP2 SH2D3B UNQ271/PRO308	SPVFRTGSEPALSPA			TGpSEPALpSPAVVR	2	T(1): 0.7; S(3): 99.3; S(8): 100.0	91	Forward	Class I
O75815	1	Breast cancer anti-estrogen resistance protein 3 OS=Homo sapiens GN=BCAR3 PE=1 SV=1 - [BCAR3_HUMAN]	O75815	S375	Breast cancer anti-estrogen resistance protein 3 (Novel SH2-containing protein 2) (SH2 domain-containing protein 3B)	BCAR3 NSP2 SH2D3B UNQ271/PRO308	TGSEPALSPAVVRRV	CAMK/MAPKAPK	MAPKAPK3	TGSEPALpSPAVVR	1	T(1): 0.0; S(3): 0.0; S(8): 100.0	168	Forward	Class I
O75821	1	Eukaryotic translation initiation factor 3 subunit G OS=Homo sapiens GN=EIF3G PE=1 SV=2 - [EIF3G_HUMAN]	O75821	T38	Eukaryotic translation initiation factor 3 subunit G (eIF3g) (Eukaryotic translation initiation factor 3 RNA-binding subunit) (eIF-3 RNA-binding subunit) (Eukaryotic translation initiation factor 3 subunit 4) (eIF-3-delta) (eIF3 p42) (eIF3 p44)	EIF3G EIF3S4	LKGIPLATGDTSPEP			GIPLApTGDTSPEPELLPGAPLPPPK	1	T(6): 93.1; T(9): 3.5; S(10): 3.5	34	Forward	Class I
O75821	1	Eukaryotic translation initiation factor 3 subunit G OS=Homo sapiens GN=EIF3G PE=1 SV=2 - [EIF3G_HUMAN]	O75821	S42	Eukaryotic translation initiation factor 3 subunit G (eIF3g) (Eukaryotic translation initiation factor 3 RNA-binding subunit) (eIF-3 RNA-binding subunit) (Eukaryotic translation initiation factor 3 subunit 4) (eIF-3-delta) (eIF3 p42) (eIF3 p44)	EIF3G EIF3S4	PLATGDTSPEPELLP			GIPLATGDTpSPEPELLPGAPLPPPK	1	T(6): 0.0; T(9): 0.9; S(10): 99.1	350	Forward	Class I
O75822	1	Eukaryotic translation initiation factor 3 subunit J OS=Homo sapiens GN=EIF3J PE=1 SV=2 - [EIF3J_HUMAN]	O75822	T109	Eukaryotic translation initiation factor 3 subunit J (eIF3j) (Eukaryotic translation initiation factor 3 subunit 1) (eIF-3-alpha) (eIF3 p35)	EIF3J EIF3S1 PRO0391	PEEPKVLTPEEQLAD	Atypical/PIKK/FRAP	FRAP	RLEEPEEPKVLpTPEEQLADK	1	T(12): 100.0	163	Forward	Class I
O75822	1	Eukaryotic translation initiation factor 3 subunit J OS=Homo sapiens GN=EIF3J PE=1 SV=2 - [EIF3J_HUMAN]	O75822	S127	Eukaryotic translation initiation factor 3 subunit J (eIF3j) (Eukaryotic translation initiation factor 3 subunit 1) (eIF-3-alpha) (eIF3 p35)	EIF3J EIF3S1 PRO0391	LKKLQEESDLELAKE			KLQEEpSDLELAK	1	S(6): 100.0	197	Forward	Class I
O75864	1	Leucine-rich repeat-containing protein 68 OS=Homo sapiens GN=LRRC68 PE=2 SV=2 - [LRC68_HUMAN]	O75864	S556	Protein phosphatase 1 regulatory subunit 37 (Leucine-rich repeat-containing protein 68)	PPP1R37 KIAA1986 LRRC68	TEQRISVSSPGRGHK			ISVpSSPGR	1	S(2): 0.4; S(4): 99.2; S(5): 0.4	102	Forward	Class I
O75864	1	Leucine-rich repeat-containing protein 68 OS=Homo sapiens GN=LRRC68 PE=2 SV=2 - [LRC68_HUMAN]	O75864	S557	Protein phosphatase 1 regulatory subunit 37 (Leucine-rich repeat-containing protein 68)	PPP1R37 KIAA1986 LRRC68	EQRISVSSPGRGHKV			ISVSpSPGRGHK	1	S(2): 0.0; S(4): 0.0; S(5): 100.0	277	Forward	Class I
O75897	1	Sulfotransferase 1C4 OS=Homo sapiens GN=SULT1C4 PE=1 SV=2 - [ST1C4_HUMAN]	O75897	S98	Sulfotransferase 1C4 (ST1C4) (EC 2.8.2.-) (Sulfotransferase 1C2) (SULT1C#2)	SULT1C4 SULT1C2	MKIPSLGSGLEQAHA			IPSLGpSGLEQAHAMPSPR	1	S(3): 0.0; S(6): 100.0; S(16): 0.0	103	Forward	Class I
O75899	1	Gamma-aminobutyric acid type B receptor subunit 2 OS=Homo sapiens GN=GABBR2 PE=1 SV=1 - [GABR2_HUMAN]	O75899	Y104	Gamma-aminobutyric acid type B receptor subunit 2 (GABA-B receptor 2) (GABA-B-R2) (GABA-BR2) (GABABR2) (Gb2) (G-protein coupled receptor 51) (HG20)	GABBR2 GPR51 GPRC3B	YFLDLRLYDTECDNA			LpYDpTECDNAKGLK	2	Y(2): 100.0; T(4): 100.0	162	Forward	Class I
O75899	1	Gamma-aminobutyric acid type B receptor subunit 2 OS=Homo sapiens GN=GABBR2 PE=1 SV=1 - [GABR2_HUMAN]	O75899	T106	Gamma-aminobutyric acid type B receptor subunit 2 (GABA-B receptor 2) (GABA-B-R2) (GABA-BR2) (GABABR2) (Gb2) (G-protein coupled receptor 51) (HG20)	GABBR2 GPR51 GPRC3B	LDLRLYDTECDNAKG			LpYDpTECDNAKGLK	2	Y(2): 100.0; T(4): 100.0	162	Forward	Class I
O75909	1	Cyclin-K OS=Homo sapiens GN=CCNK PE=1 SV=1 - [CCNK_HUMAN]	O75909	S9	Cyclin-K	CCNK CPR4	KENKENSSPSVTSAN	CMGC/CDK/CDC2	CDK2	ENSpSPSVTSANLDHTKPCWYWDK	1	S(3): 1.1; S(4): 95.7; S(6): 1.1; T(8): 1.1; S(9): 1.1; T(15): 0.0; Y(20): 0.0	142	Forward	Class I
O75909	1	Cyclin-K OS=Homo sapiens GN=CCNK PE=1 SV=1 - [CCNK_HUMAN]	O75909	S324	Cyclin-K	CCNK CPR4	AQQPKKPSPQPSSPR	CMGC/CDK/CDC2	CDK2	KPpSPQPSSPR	1	S(3): 100.0; S(7): 0.0; S(8): 0.0	164	Forward	Class I
O75909	1	Cyclin-K OS=Homo sapiens GN=CCNK PE=1 SV=1 - [CCNK_HUMAN]	O75909	S340	Cyclin-K	CCNK CPR4	VKRAVVVSPKEENKA	CMGC/CDK/CDC2	CDK2	RAVVVpSPKEENK	1	S(6): 100.0	308	Forward	Class I
O75925	1	E3 SUMO-protein ligase PIAS1 OS=Homo sapiens GN=PIAS1 PE=1 SV=2 - [PIAS1_HUMAN]	O75925	S503	E3 SUMO-protein ligase PIAS1 (EC 6.3.2.-) (DEAD/H box-binding protein 1) (Gu-binding protein) (GBP) (Protein inhibitor of activated STAT protein 1) (RNA helicase II-binding protein)	PIAS1 DDXBP1	LSLPHQASPVSRTPS			GILSLPHQApSPVSR	1	S(4): 0.0; S(10): 100.0; S(13): 0.0	277	Forward	Class I
O75928	1	E3 SUMO-protein ligase PIAS2 OS=Homo sapiens GN=PIAS2 PE=1 SV=1 - [PIAS2_HUMAN]	O75928	S499	E3 SUMO-protein ligase PIAS2 (EC 6.3.2.-) (Androgen receptor-interacting protein 3) (ARIP3) (DAB2-interacting protein) (DIP) (Msx-interacting zinc finger protein) (Miz1) (PIAS-NY protein) (Protein inhibitor of activated STAT x) (Protein inhibitor of activated STAT2)	PIAS2 PIASX	FMSETQSSPTKGVLM			CIFMSETQSpSPTK	1	S(5): 0.0; T(7): 0.0; S(9): 3.6; S(10): 92.7; T(12): 3.6	112	Forward	Class I
O75962	1	Triple functional domain protein OS=Homo sapiens GN=TRIO PE=1 SV=1 - [TRIO_HUMAN]	O75962	S1664	Triple functional domain protein (EC 2.7.11.1) (PTPRF-interacting protein)	TRIO	LCIAHSRSSMEMEGI			pSSMEMEGIFNHK	1	S(1): 95.6; S(2): 4.4	205	Forward	Class I
O75962	1	Triple functional domain protein OS=Homo sapiens GN=TRIO PE=1 SV=1 - [TRIO_HUMAN]	O75962	S1665	Triple functional domain protein (EC 2.7.11.1) (PTPRF-interacting protein)	TRIO	CIAHSRSSMEMEGIF			SpSMEMEGIFNHK	1	S(1): 0.0; S(2): 100.0	328	Forward	Class I
O75962	1	Triple functional domain protein OS=Homo sapiens GN=TRIO PE=1 SV=1 - [TRIO_HUMAN]	O75962	S1726	Triple functional domain protein (EC 2.7.11.1) (PTPRF-interacting protein)	TRIO	TSPVRRLSSGKADGH			RLpSSGKADGHVK	1	S(3): 100.0; S(4): 0.0	306	Forward	Class I
O75962	1	Triple functional domain protein OS=Homo sapiens GN=TRIO PE=1 SV=1 - [TRIO_HUMAN]	O75962	S1759	Triple functional domain protein (EC 2.7.11.1) (PTPRF-interacting protein)	TRIO	DAGSQKDSDDSAATP			SADAGSQKDpSDDSAATPQDETVEER	1	S(1): 0.0; S(6): 0.0; S(10): 100.0; S(13): 0.0; T(16): 0.0; T(21): 0.0	282	Forward	Class I
O75962	1	Triple functional domain protein OS=Homo sapiens GN=TRIO PE=1 SV=1 - [TRIO_HUMAN]	O75962	S2367	Triple functional domain protein (EC 2.7.11.1) (PTPRF-interacting protein)	TRIO	RKGAANASGSSPDAP			GAANApSGSSPDAPAK	1	S(6): 91.8; S(8): 4.1; S(9): 4.1	94	Forward	Class I
O75962	1	Triple functional domain protein OS=Homo sapiens GN=TRIO PE=1 SV=1 - [TRIO_HUMAN]	O75962	S2370	Triple functional domain protein (EC 2.7.11.1) (PTPRF-interacting protein)	TRIO	AANASGSSPDAPAKD			KGAANASGSpSPDAPAK	1	S(7): 0.0; S(9): 0.2; S(10): 99.8	253	Forward	Class I
O75969	1	A-kinase anchor protein 3 OS=Homo sapiens GN=AKAP3 PE=1 SV=1 - [AKAP3_HUMAN]	O75969	T371	A-kinase anchor protein 3 (AKAP-3) (A-kinase anchor protein 110 kDa) (AKAP 110) (Cancer/testis antigen 82) (CT82) (Fibrous sheath protein of 95 kDa) (FSP95) (Fibrousheathin I) (Fibrousheathin-1) (Protein kinase A-anchoring protein 3) (PRKA3) (Sperm oocyte-binding protein)	AKAP3 AKAP110 SOB1	SHGSQKATDIMDAML			ApTDIMDAMLR	1	T(2): 100.0	73	Forward	Class I
O75970	1	Multiple PDZ domain protein OS=Homo sapiens GN=MPDZ PE=1 SV=1 - [MPDZ_HUMAN]	O75970	S230	Multiple PDZ domain protein (Multi-PDZ domain protein 1)	MPDZ MUPP1	GSLPQLVSPIVSRSP			GSLPQLVpSPIVSR	1	S(2): 0.0; S(8): 100.0; S(12): 0.0	67	Forward	Class I
O75970	1	Multiple PDZ domain protein OS=Homo sapiens GN=MPDZ PE=1 SV=1 - [MPDZ_HUMAN]	O75970	S354	Multiple PDZ domain protein (Multi-PDZ domain protein 1)	MPDZ MUPP1	LGITLSSSPTSTPEL			TAPTALGITLSSpSPTSTPELR	1	T(1): 0.0; T(4): 0.0; T(9): 0.0; S(11): 0.0; S(12): 0.9; S(13): 98.2; T(15): 0.9; S(16): 0.0; T(17): 0.0	291	Forward	Class I
O75970	1	Multiple PDZ domain protein OS=Homo sapiens GN=MPDZ PE=1 SV=1 - [MPDZ_HUMAN]	O75970	S483	Multiple PDZ domain protein (Multi-PDZ domain protein 1)	MPDZ MUPP1	VTKDADLSPVNASII			DADLpSPVNASIIK	1	S(5): 100.0; S(10): 0.0	182	Forward	Class I
O75970	1	Multiple PDZ domain protein OS=Homo sapiens GN=MPDZ PE=1 SV=1 - [MPDZ_HUMAN]	O75970	S1595	Multiple PDZ domain protein (Multi-PDZ domain protein 1)	MPDZ MUPP1	LMVPQSGSPEPESIR			KNSSQSLMVPQSGpSPEPESIR	1	S(3): 0.0; S(4): 0.0; S(6): 0.0; S(12): 0.0; S(14): 100.0; S(19): 0.0	242	Forward	Class I
O75976	1	Carboxypeptidase D OS=Homo sapiens GN=CPD PE=1 SV=2 - [CBPD_HUMAN]	O75976	S940	Carboxypeptidase D (EC 3.4.17.22) (Metallocarboxypeptidase D) (gp180)	CPD	YHSYKDLSEFLRGLV			DLpSEFLR	1	S(3): 100.0	55	Forward	Class I
O75976	1	Carboxypeptidase D OS=Homo sapiens GN=CPD PE=1 SV=2 - [CBPD_HUMAN]	O75976	T1368	Carboxypeptidase D (EC 3.4.17.22) (Metallocarboxypeptidase D) (gp180)	CPD	SHEFQDETDTEEETL	Other/CK2	CK2a2	SLLSHEFQDEpTDTEEETLYSSKH	1	S(1): 0.0; S(4): 0.0; T(11): 100.0; T(13): 0.0; T(17): 0.0; Y(19): 0.0; S(20): 0.0; S(21): 0.0	390	Forward	Class I
O75976	1	Carboxypeptidase D OS=Homo sapiens GN=CPD PE=1 SV=2 - [CBPD_HUMAN]	O75976	T1370	Carboxypeptidase D (EC 3.4.17.22) (Metallocarboxypeptidase D) (gp180)	CPD	EFQDETDTEEETLYS	Other/CK2	CK2a2	SLLSHEFQDEpTDpTEEETLYSSKH	2	S(1): 0.0; S(4): 0.0; T(11): 100.0; T(13): 100.0; T(17): 0.0; Y(19): 0.0; S(20): 0.0; S(21): 0.0	315	Forward	Class I
O75976	1	Carboxypeptidase D OS=Homo sapiens GN=CPD PE=1 SV=2 - [CBPD_HUMAN]	O75976	Y1376	Carboxypeptidase D (EC 3.4.17.22) (Metallocarboxypeptidase D) (gp180)	CPD	DTEEETLYSSKH***	TK/Src	LCK	SLLSHEFQDETDTEEETLpYSSKH	1	S(1): 0.0; S(4): 0.0; T(11): 1.8; T(13): 1.8; T(17): 1.8; Y(19): 91.2; S(20): 1.8; S(21): 1.8	80	Forward	Class I
O75995	1	SAM and SH3 domain-containing protein 3 OS=Homo sapiens GN=SASH3 PE=2 SV=2 - [SASH3_HUMAN]	O75995	S10	SAM and SH3 domain-containing protein 3 (SH3 protein expressed in lymphocytes homolog)	SASH3 CXorf9 SLY	RRKPSNASEKEPTQK			KPSNApSEKEPTQK	1	S(3): 5.1; S(6): 94.9; T(11): 0.0	128	Forward	Class I
O76021	1	Ribosomal L1 domain-containing protein 1 OS=Homo sapiens GN=RSL1D1 PE=1 SV=3 - [RL1D1_HUMAN]	O76021	S361	Ribosomal L1 domain-containing protein 1 (CATX-11) (Cellular senescence-inhibited gene protein) (Protein PBK1)	RSL1D1 CATX11 CSIG PBK1 L12	QVKATNESEDEIPQL			ATNEpSEDEIPQLVPIGK	1	T(2): 0.0; S(5): 100.0	393	Forward	Class I
O76021	1	Ribosomal L1 domain-containing protein 1 OS=Homo sapiens GN=RSL1D1 PE=1 SV=3 - [RL1D1_HUMAN]	O76021	S427	Ribosomal L1 domain-containing protein 1 (CATX-11) (Cellular senescence-inhibited gene protein) (Protein PBK1)	RSL1D1 CATX11 CSIG PBK1 L12	ESETPGKSPEKKPKI			AAESETPGKpSPEKKPK	1	S(4): 0.0; T(6): 0.0; S(10): 100.0	159	Forward	Class I
O76021	1	Ribosomal L1 domain-containing protein 1 OS=Homo sapiens GN=RSL1D1 PE=1 SV=3 - [RL1D1_HUMAN]	O76021	T454	Ribosomal L1 domain-containing protein 1 (CATX-11) (Cellular senescence-inhibited gene protein) (Protein PBK1)	RSL1D1 CATX11 CSIG PBK1 L12	GKKDARQTPKKPEAK			DARQpTPKKPEAK	1	T(5): 100.0	110	Forward	Class I
O76024	1	Wolframin OS=Homo sapiens GN=WFS1 PE=1 SV=1 - [WFS1_HUMAN]	O76024	S32	Wolframin	WFS1	SRLNATASLEQERSE	AGC/PKC	PKCe	SRLNATApSLEQER	1	S(1): 0.0; T(6): 0.0; S(8): 100.0	390	Forward	Class I
O76064	1	E3 ubiquitin-protein ligase RNF8 OS=Homo sapiens GN=RNF8 PE=1 SV=1 - [RNF8_HUMAN]	O76064	S157	E3 ubiquitin-protein ligase RNF8 (EC 6.3.2.-) (RING finger protein 8)	RNF8 KIAA0646	LRTKRKFSLDELAGP	AGC	LATS1	RKFpSLDELAGPGAEGPSNLK	1	S(4): 100.0; S(17): 0.0	276	Forward	Class I
O94759	1	Transient receptor potential cation channel subfamily M member 2 OS=Homo sapiens GN=TRPM2 PE=1 SV=2 - [TRPM2_HUMAN]	O94759	S82	Transient receptor potential cation channel subfamily M member 2 (EC 3.6.1.13) (Estrogen-responsive element-associated gene 1 protein) (Long transient receptor potential channel 2) (LTrpC-2) (LTrpC2) (Transient receptor potential channel 7) (TrpC7)	TRPM2 EREG1 KNP3 LTRPC2 TRPC7	FVESSKLSDAGKVVC			LpSDAGK	1	S(2): 100.0	69	Forward	Class I
O94763	1	Unconventional prefoldin RPB5 interactor OS=Homo sapiens GN=RMP PE=1 SV=2 - [RMP_HUMAN]	O94763	S371	Unconventional prefoldin RPB5 interactor 1 (Protein NNX3) (Protein phosphatase 1 regulatory subunit 19) (RNA polymerase II subunit 5-mediating protein) (RPB5-mediating protein)	URI1 C19orf2 NNX3 PPP1R19 RMP URI	AKRKRKNSTGSGHSA	AGC	LATS2	RKNpSTGSGHSAQELPTIR	1	S(4): 100.0; T(5): 0.0; S(7): 0.0; S(10): 0.0; T(16): 0.0	295	Forward	Class I
O94776	1	Metastasis-associated protein MTA2 OS=Homo sapiens GN=MTA2 PE=1 SV=1 - [MTA2_HUMAN]	O94776	S435	Metastasis-associated protein MTA2 (Metastasis-associated 1-like 1) (MTA1-L1 protein) (p53 target protein in deacetylase complex)	MTA2 MTA1L1 PID	RPEAQSLSPYTTSAN	CMGC/GSK	GSK3A	GHLSRPEAQSLpSPYTTSANR	1	S(4): 0.0; S(10): 0.5; S(12): 99.0; Y(14): 0.5; T(15): 0.0; T(16): 0.0; S(17): 0.0	224	Forward	Class I
O94804	1	Serine/threonine-protein kinase 10 OS=Homo sapiens GN=STK10 PE=1 SV=1 - [STK10_HUMAN]	O94804	S438	Serine/threonine-protein kinase 10 (EC 2.7.11.1) (Lymphocyte-oriented kinase)	STK10 LOK	AEQGGDLSPAANRSQ	STE/STE11	MAP3K1	QVAEQGGDLpSPAANR	1	S(10): 100.0	477	Forward	Class I
O94804	1	Serine/threonine-protein kinase 10 OS=Homo sapiens GN=STK10 PE=1 SV=1 - [STK10_HUMAN]	O94804	S448	Serine/threonine-protein kinase 10 (EC 2.7.11.1) (Lymphocyte-oriented kinase)	STK10 LOK	ANRSQKASQSRPNSS	Atypical/PIKK/ATM	ATM	ApSQSRPNpSSALETLGGEK	2	S(2): 92.6; S(4): 13.9; S(8): 86.0; S(9): 7.4; T(13): 0.0	81	Forward	Class I
O94804	1	Serine/threonine-protein kinase 10 OS=Homo sapiens GN=STK10 PE=1 SV=1 - [STK10_HUMAN]	O94804	S450	Serine/threonine-protein kinase 10 (EC 2.7.11.1) (Lymphocyte-oriented kinase)	STK10 LOK	RSQKASQSRPNSSAL	Other/PLK	PLK1	ASQpSRPNSSALETLGGEK	1	S(2): 0.0; S(4): 100.0; S(8): 0.0; S(9): 0.0; T(13): 0.0	395	Forward	Class I
O94804	1	Serine/threonine-protein kinase 10 OS=Homo sapiens GN=STK10 PE=1 SV=1 - [STK10_HUMAN]	O94804	S454	Serine/threonine-protein kinase 10 (EC 2.7.11.1) (Lymphocyte-oriented kinase)	STK10 LOK	ASQSRPNSSALETLG	STE/STE20	LOK	ASQSRPNpSSALETLGGEK	1	S(2): 0.0; S(4): 0.0; S(8): 100.0; S(9): 0.0; T(13): 0.0	433	Forward	Class I
O94804	1	Serine/threonine-protein kinase 10 OS=Homo sapiens GN=STK10 PE=1 SV=1 - [STK10_HUMAN]	O94804	S455	Serine/threonine-protein kinase 10 (EC 2.7.11.1) (Lymphocyte-oriented kinase)	STK10 LOK	SQSRPNSSALETLGG	Other/PLK	PLK1	ASQpSRPNSpSALETLGGEK	2	S(2): 6.0; S(4): 94.0; S(8): 6.0; S(9): 94.0; T(13): 0.0	119	Forward	Class I
O94804	1	Serine/threonine-protein kinase 10 OS=Homo sapiens GN=STK10 PE=1 SV=1 - [STK10_HUMAN]	O94804	S514	Serine/threonine-protein kinase 10 (EC 2.7.11.1) (Lymphocyte-oriented kinase)	STK10 LOK	SLNKEMGSLSIKDPK			EMGpSLSIKDPK	1	S(4): 100.0; S(6): 0.0	203	Forward	Class I
O94804	1	Serine/threonine-protein kinase 10 OS=Homo sapiens GN=STK10 PE=1 SV=1 - [STK10_HUMAN]	O94804	T952	Serine/threonine-protein kinase 10 (EC 2.7.11.1) (Lymphocyte-oriented kinase)	STK10 LOK	AECPNPSTPSKAAKF	Other/PLK	PLK1	LSEEAECPNPSpTPSK	1	S(2): 0.0; S(11): 0.0; T(12): 100.0; S(14): 0.0	247	Forward	Class I
O94805	1	Actin-like protein 6B OS=Homo sapiens GN=ACTL6B PE=1 SV=1 - [ACL6B_HUMAN]	O94805	T383	Actin-like protein 6B (53 kDa BRG1-associated factor B) (Actin-related protein Baf53b) (ArpNalpha) (BRG1-associated factor 53B) (BAF53B)	ACTL6B ACTL6 BAF53B	KLIASNSTMERKFSP			LIASNSpTMERK	1	S(4): 0.0; S(6): 8.0; T(7): 92.0	124	Forward	Class I
O94806	1	Serine/threonine-protein kinase D3 OS=Homo sapiens GN=PRKD3 PE=1 SV=1 - [KPCD3_HUMAN]	O94806	S27	Serine/threonine-protein kinase D3 (EC 2.7.11.13) (Protein kinase C nu type) (Protein kinase EPK2) (nPKC-nu)	PRKD3 EPK2 PRKCN	PAVLPAASPCSSPKT	Atypical/PIKK/FRAP	FRAP	SVLPTAIPAVLPAApSPCSpSPK	2	S(1): 0.0; T(5): 0.0; S(15): 99.8; S(18): 50.1; S(19): 50.1	123	Forward	Class I
O94806	1	Serine/threonine-protein kinase D3 OS=Homo sapiens GN=PRKD3 PE=1 SV=1 - [KPCD3_HUMAN]	O94806	S41	Serine/threonine-protein kinase D3 (EC 2.7.11.13) (Protein kinase C nu type) (Protein kinase EPK2) (nPKC-nu)	PRKD3 EPK2 PRKCN	TGLSARLSNGSFSAP			LpSNGSFSAPSLTNSR	1	S(2): 100.0; S(5): 0.0; S(7): 0.0; S(10): 0.0; T(12): 0.0; S(14): 0.0	132	Forward	Class I
O94806	1	Serine/threonine-protein kinase D3 OS=Homo sapiens GN=PRKD3 PE=1 SV=1 - [KPCD3_HUMAN]	O94806	S252	Serine/threonine-protein kinase D3 (EC 2.7.11.13) (Protein kinase C nu type) (Protein kinase EPK2) (nPKC-nu)	PRKD3 EPK2 PRKCN	EPSKRIPSWSGRPIW			RIPpSWSGRPIWMEK	1	S(4): 100.0; S(6): 0.0	206	Forward	Class I
O94806	1	Serine/threonine-protein kinase D3 OS=Homo sapiens GN=PRKD3 PE=1 SV=1 - [KPCD3_HUMAN]	O94806	T535	Serine/threonine-protein kinase D3 (EC 2.7.11.13) (Protein kinase C nu type) (Protein kinase EPK2) (nPKC-nu)	PRKD3 EPK2 PRKCN	RQALMPVTPQASVCT	Atypical/PIKK/FRAP	FRAP	QALMPVpTPQASVCTSPGQGK	1	T(7): 100.0; S(11): 0.0; T(14): 0.0; S(15): 0.0	86	Forward	Class I
O94808	1	Glucosamine--fructose-6-phosphate aminotransferase [isomerizing] 2 OS=Homo sapiens GN=GFPT2 PE=1 SV=3 - [GFPT2_HUMAN]	O94808	S244	Glucosamine--fructose-6-phosphate aminotransferase [isomerizing] 2 (EC 2.6.1.16) (D-fructose-6-phosphate amidotransferase 2) (Glutamine:fructose 6 phosphate amidotransferase 2) (GFAT 2) (GFAT2) (Hexosephosphate aminotransferase 2)	GFPT2	TRMKRLDSSACLHAV			RLDpSSACLHAVGDK	1	S(4): 99.9; S(5): 0.1	340	Forward	Class I
O94813	1	Slit homolog 2 protein OS=Homo sapiens GN=SLIT2 PE=1 SV=1 - [SLIT2_HUMAN]	O94813	T899	Slit homolog 2 protein (Slit-2) [Cleaved into: Slit homolog 2 protein N-product; Slit homolog 2 protein C-product]	SLIT2 SLIL3	MADKLLLTTPSKKFT			LLLpTpTPSKK	2	T(4): 100.0; T(5): 100.0; S(7): 0.0	126	Forward	Class I
O94813	1	Slit homolog 2 protein OS=Homo sapiens GN=SLIT2 PE=1 SV=1 - [SLIT2_HUMAN]	O94813	T900	Slit homolog 2 protein (Slit-2) [Cleaved into: Slit homolog 2 protein N-product; Slit homolog 2 protein C-product]	SLIT2 SLIL3	ADKLLLTTPSKKFTC			LLLpTpTPSKK	2	T(4): 100.0; T(5): 100.0; S(7): 0.0	126	Forward	Class I
O94826	1	Mitochondrial import receptor subunit TOM70 OS=Homo sapiens GN=TOMM70A PE=1 SV=1 - [TOM70_HUMAN]	O94826	S91	Mitochondrial import receptor subunit TOM70 (Mitochondrial precursor proteins import receptor) (Translocase of outer membrane 70 kDa subunit)	TOMM70A KIAA0719 TOM70	KTPEGRASPAPGSGH			ApSPAPGSGHPEGPGAHLDMNSLDR	1	S(2): 99.2; S(7): 0.8; S(21): 0.0	199	Forward	Class I
O94826	1	Mitochondrial import receptor subunit TOM70 OS=Homo sapiens GN=TOMM70A PE=1 SV=1 - [TOM70_HUMAN]	O94826	S96	Mitochondrial import receptor subunit TOM70 (Mitochondrial precursor proteins import receptor) (Translocase of outer membrane 70 kDa subunit)	TOMM70A KIAA0719 TOM70	RASPAPGSGHPEGPG			KTPEGRASPAPGpSGHPEGPGAHLDMNSLDR	1	T(2): 0.2; S(8): 16.9; S(13): 82.8; S(27): 0.0	56	Forward	Class I
O94827	1	Pleckstrin homology domain-containing family G member 5 OS=Homo sapiens GN=PLEKHG5 PE=2 SV=3 - [PKHG5_HUMAN]	O94827	S222	Pleckstrin homology domain-containing family G member 5 (PH domain-containing family G member 5) (Guanine nucleotide exchange factor 720) (GEF720)	PLEKHG5 KIAA0720	QGMKDSKSLSLPILR			pSLSLPILRPAGTGPPALER	1	S(1): 88.7; S(3): 11.3; T(12): 0.0	144	Forward	Class I
O94827	1	Pleckstrin homology domain-containing family G member 5 OS=Homo sapiens GN=PLEKHG5 PE=2 SV=3 - [PKHG5_HUMAN]	O94827	S224	Pleckstrin homology domain-containing family G member 5 (PH domain-containing family G member 5) (Guanine nucleotide exchange factor 720) (GEF720)	PLEKHG5 KIAA0720	MKDSKSLSLPILRPA			SLpSLPILRPAGTGPPALER	1	S(1): 10.5; S(3): 89.5; T(12): 0.0	113	Forward	Class I
O94827	1	Pleckstrin homology domain-containing family G member 5 OS=Homo sapiens GN=PLEKHG5 PE=2 SV=3 - [PKHG5_HUMAN]	O94827	S249	Pleckstrin homology domain-containing family G member 5 (PH domain-containing family G member 5) (Guanine nucleotide exchange factor 720) (GEF720)	PLEKHG5 KIAA0720	DAQSRRESLDILAPG	Other/AUR/AUR-B	AurB	REpSLDILAPGRR	1	S(3): 100.0	229	Forward	Class I
O94827	1	Pleckstrin homology domain-containing family G member 5 OS=Homo sapiens GN=PLEKHG5 PE=2 SV=3 - [PKHG5_HUMAN]	O94827	S907	Pleckstrin homology domain-containing family G member 5 (PH domain-containing family G member 5) (Guanine nucleotide exchange factor 720) (GEF720)	PLEKHG5 KIAA0720	PESPRVPSPPPSPRL			APESPRVPpSPPPpSPR	2	S(4): 0.0; S(9): 100.0; S(13): 100.0	170	Forward	Class I
O94827	1	Pleckstrin homology domain-containing family G member 5 OS=Homo sapiens GN=PLEKHG5 PE=2 SV=3 - [PKHG5_HUMAN]	O94827	S911	Pleckstrin homology domain-containing family G member 5 (PH domain-containing family G member 5) (Guanine nucleotide exchange factor 720) (GEF720)	PLEKHG5 KIAA0720	RVPSPPPSPRLRRRT			APESPRVPpSPPPpSPR	2	S(4): 0.0; S(9): 100.0; S(13): 100.0	170	Forward	Class I
O94827	1	Pleckstrin homology domain-containing family G member 5 OS=Homo sapiens GN=PLEKHG5 PE=2 SV=3 - [PKHG5_HUMAN]	O94827	S957	Pleckstrin homology domain-containing family G member 5 (PH domain-containing family G member 5) (Guanine nucleotide exchange factor 720) (GEF720)	PLEKHG5 KIAA0720	TPSAPSRSLSELCLA			pSLSELCLAVPAPGIR	1	S(1): 99.6; S(3): 0.4	305	Forward	Class I
O94827	1	Pleckstrin homology domain-containing family G member 5 OS=Homo sapiens GN=PLEKHG5 PE=2 SV=3 - [PKHG5_HUMAN]	O94827	S959	Pleckstrin homology domain-containing family G member 5 (PH domain-containing family G member 5) (Guanine nucleotide exchange factor 720) (GEF720)	PLEKHG5 KIAA0720	SAPSRSLSELCLAVP			SLpSELCLAVPAPGIR	1	S(1): 0.3; S(3): 99.7	260	Forward	Class I
O94833	1	Bullous pemphigoid antigen 1, isoforms 6/9/10 OS=Homo sapiens GN=DST PE=1 SV=3 - [BPAEA_HUMAN]	O94833	S1556	Replaced by: Q03001 = Dystonin (230 kDa bullous pemphigoid antigen) (230/240 kDa bullous pemphigoid antigen) (Bullous pemphigoid antigen 1) (BPA) (Bullous pemphigoid antigen) (Dystonia musculorum protein) (Hemidesmosomal plaque protein)	DST BP230 BP240 BPAG1 DMH DT KIAA0728	TKLKRQKSFSEDVIS			pSFSEDVISHKGDLR	1	S(1): 100.0; S(3): 0.0; S(8): 0.0	255	Forward	Class I
O94833	1	Bullous pemphigoid antigen 1, isoforms 6/9/10 OS=Homo sapiens GN=DST PE=1 SV=3 - [BPAEA_HUMAN]	O94833	S2946	Replaced by: Q03001 = Dystonin (230 kDa bullous pemphigoid antigen) (230/240 kDa bullous pemphigoid antigen) (Bullous pemphigoid antigen 1) (BPA) (Bullous pemphigoid antigen) (Dystonia musculorum protein) (Hemidesmosomal plaque protein)	DST BP230 BP240 BPAG1 DMH DT KIAA0728	QSAAKSTSTQGLEHD			STpSTQGLEHDLDDVNAR	1	S(1): 0.0; T(2): 0.0; S(3): 100.0; T(4): 0.0	262	Forward	Class I
O94833	1	Bullous pemphigoid antigen 1, isoforms 6/9/10 OS=Homo sapiens GN=DST PE=1 SV=3 - [BPAEA_HUMAN]	O94833	S4984	Replaced by: Q03001 = Dystonin (230 kDa bullous pemphigoid antigen) (230/240 kDa bullous pemphigoid antigen) (Bullous pemphigoid antigen 1) (BPA) (Bullous pemphigoid antigen) (Dystonia musculorum protein) (Hemidesmosomal plaque protein)	DST BP230 BP240 BPAG1 DMH DT KIAA0728	RGASPNRSTSVSSQA			pSTSVSSQAAQAASPQVPATTTPK	1	S(1): 98.0; T(2): 0.5; S(3): 0.5; S(5): 0.5; S(6): 0.5; S(13): 0.0; T(19): 0.0; T(20): 0.0; T(21): 0.0	292	Forward	Class I
O94833	1	Bullous pemphigoid antigen 1, isoforms 6/9/10 OS=Homo sapiens GN=DST PE=1 SV=3 - [BPAEA_HUMAN]	O94833	S4986	Replaced by: Q03001 = Dystonin (230 kDa bullous pemphigoid antigen) (230/240 kDa bullous pemphigoid antigen) (Bullous pemphigoid antigen 1) (BPA) (Bullous pemphigoid antigen) (Dystonia musculorum protein) (Hemidesmosomal plaque protein)	DST BP230 BP240 BPAG1 DMH DT KIAA0728	ASPNRSTSVSSQAAQ			STpSVSSQAAQAASPQVPATTTPK	1	S(1): 0.6; T(2): 0.6; S(3): 97.5; S(5): 0.6; S(6): 0.6; S(13): 0.0; T(19): 0.0; T(20): 0.0; T(21): 0.0	350	Forward	Class I
O94854	1	Uncharacterized protein KIAA0754 OS=Homo sapiens GN=KIAA0754 PE=1 SV=3 - [K0754_HUMAN]	O94854	T122	Uncharacterized protein KIAA0754	KIAA0754	ESRFSSATWPRATKS			FSSApTWPR	1	S(2): 0.0; S(3): 1.0; T(5): 99.0	82	Forward	Class I
O94854	1	Uncharacterized protein KIAA0754 OS=Homo sapiens GN=KIAA0754 PE=1 SV=3 - [K0754_HUMAN]	O94854	S666	Uncharacterized protein KIAA0754	KIAA0754	GEMERRDSDSFLNIF			RDpSDSFLNIFPEK	1	S(3): 99.7; S(5): 0.3	284	Forward	Class I
O94855	1	Protein transport protein Sec24D OS=Homo sapiens GN=SEC24D PE=2 SV=1 - [SC24D_HUMAN]	O94855	S266	Protein transport protein Sec24D (SEC24-related protein D)	SEC24D KIAA0755	LDPDSIPSPIQVIEN			KLDPDSIPpSPIQVIENDR	1	S(6): 0.0; S(9): 100.0	243	Forward	Class I
O94868	1	FCH and double SH3 domains protein 2 OS=Homo sapiens GN=FCHSD2 PE=1 SV=3 - [FCSD2_HUMAN]	O94868	S681	FCH and double SH3 domains protein 2 (Carom) (SH3 multiple domains protein 3)	FCHSD2 KIAA0769 SH3MD3	SSLYFPRSPSANEKS			RSSLYFPRpSPSANEK	1	S(2): 0.0; S(3): 0.0; Y(5): 0.0; S(9): 100.0; S(11): 0.0	325	Forward	Class I
O94875	1	Sorbin and SH3 domain-containing protein 2 OS=Homo sapiens GN=SORBS2 PE=1 SV=3 - [SRBS2_HUMAN]	O94875	S230	Sorbin and SH3 domain-containing protein 2 (Arg/Abl-interacting protein 2) (ArgBP2) (Sorbin)	SORBS2 ARGBP2 KIAA0777	LQHERPASLYQSSID	AGC/AKT	AKT1	SSILQHERPApSLYQSSIDR	1	S(1): 0.0; S(2): 0.0; S(11): 100.0; Y(13): 0.0; S(15): 0.0; S(16): 0.0	186	Forward	Class I
O94875	1	Sorbin and SH3 domain-containing protein 2 OS=Homo sapiens GN=SORBS2 PE=1 SV=3 - [SRBS2_HUMAN]	O94875	S259	Sorbin and SH3 domain-containing protein 2 (Arg/Abl-interacting protein 2) (ArgBP2) (Sorbin)	SORBS2 ARGBP2 KIAA0777	DFRKRRKSEPAVGPP	AGC/AKT	AKT1	RKpSEPAVGPPR	1	S(3): 100.0	218	Forward	Class I
O94875	1	Sorbin and SH3 domain-containing protein 2 OS=Homo sapiens GN=SORBS2 PE=1 SV=3 - [SRBS2_HUMAN]	O94875	S278	Sorbin and SH3 domain-containing protein 2 (Arg/Abl-interacting protein 2) (ArgBP2) (Sorbin)	SORBS2 ARGBP2 KIAA0777	DQSASRTSPGRVDLP	CMGC/MAPK	Erk2	TpSPGRVDLPGSSTTLTK	1	T(1): 0.1; S(2): 99.9; S(11): 0.0; S(12): 0.0; T(13): 0.0; T(14): 0.0; T(16): 0.0	379	Forward	Class I
O94875	1	Sorbin and SH3 domain-containing protein 2 OS=Homo sapiens GN=SORBS2 PE=1 SV=3 - [SRBS2_HUMAN]	O94875	S287	Sorbin and SH3 domain-containing protein 2 (Arg/Abl-interacting protein 2) (ArgBP2) (Sorbin)	SORBS2 ARGBP2 KIAA0777	GRVDLPGSSTTLTKS			GLGDQSASRTSPGRVDLPGpSSTTLTK	1	S(6): 0.0; S(8): 0.0; T(10): 1.8; S(11): 1.8; S(20): 94.7; S(21): 1.8; T(22): 0.0; T(23): 0.0; T(25): 0.0	196	Forward	Class I
O94875	1	Sorbin and SH3 domain-containing protein 2 OS=Homo sapiens GN=SORBS2 PE=1 SV=3 - [SRBS2_HUMAN]	O94875	S298	Sorbin and SH3 domain-containing protein 2 (Arg/Abl-interacting protein 2) (ArgBP2) (Sorbin)	SORBS2 ARGBP2 KIAA0777	LTKSFTSSSPSSPSR	CMGC/GSK	GSK3A	SFTSpSSPSpSPSR	2	S(1): 0.0; T(3): 0.0; S(4): 0.3; S(5): 99.7; S(6): 0.0; S(8): 0.3; S(9): 99.7; S(11): 0.0	146	Forward	Class I
O94875	1	Sorbin and SH3 domain-containing protein 2 OS=Homo sapiens GN=SORBS2 PE=1 SV=3 - [SRBS2_HUMAN]	O94875	S301	Sorbin and SH3 domain-containing protein 2 (Arg/Abl-interacting protein 2) (ArgBP2) (Sorbin)	SORBS2 ARGBP2 KIAA0777	SFTSSSPSSPSRAKG	CMGC/GSK	GSK3A	SFTSSSPpSSPSR	1	S(1): 0.0; T(3): 0.0; S(4): 0.0; S(5): 0.0; S(6): 0.9; S(8): 98.3; S(9): 0.9; S(11): 0.0	173	Forward	Class I
O94875	1	Sorbin and SH3 domain-containing protein 2 OS=Homo sapiens GN=SORBS2 PE=1 SV=3 - [SRBS2_HUMAN]	O94875	S302	Sorbin and SH3 domain-containing protein 2 (Arg/Abl-interacting protein 2) (ArgBP2) (Sorbin)	SORBS2 ARGBP2 KIAA0777	FTSSSPSSPSRAKGG	CMGC/GSK	GSK3A	SFTSpSSPSpSPSR	2	S(1): 0.0; T(3): 0.0; S(4): 0.3; S(5): 99.7; S(6): 0.0; S(8): 0.3; S(9): 99.7; S(11): 0.0	146	Forward	Class I
O94876	1	Transmembrane and coiled-coil domains protein 1 OS=Homo sapiens GN=TMCC1 PE=1 SV=2 - [TMCC1_HUMAN]	O94876	S134	Transmembrane and coiled-coil domains protein 1	TMCC1 KIAA0779	KPEAPKGSPQINRKS			GKPEAPKGpSPQINRK	1	S(9): 100.0	231	Forward	Class I
O94876	1	Transmembrane and coiled-coil domains protein 1 OS=Homo sapiens GN=TMCC1 PE=1 SV=2 - [TMCC1_HUMAN]	O94876	S382	Transmembrane and coiled-coil domains protein 1	TMCC1 KIAA0779	LIRNKFGSADNIPNL			NKFGpSADNIPNLK	1	S(5): 100.0	297	Forward	Class I
O94880	1	PHD finger protein 14 OS=Homo sapiens GN=PHF14 PE=1 SV=1 - [PHF14_HUMAN]	O94880	T287	PHD finger protein 14	PHF14 KIAA0783	SADDEELTNDSLTLS			NSADDEELpTNDpSLTLSQSK	2	S(2): 0.0; T(9): 100.0; S(12): 100.0; T(14): 0.0; S(16): 0.0; S(18): 0.0	259	Forward	Class I
O94880	1	PHD finger protein 14 OS=Homo sapiens GN=PHF14 PE=1 SV=1 - [PHF14_HUMAN]	O94880	S290	PHD finger protein 14	PHF14 KIAA0783	DEELTNDSLTLSQSK			NSADDEELpTNDpSLTLSQSK	2	S(2): 0.0; T(9): 100.0; S(12): 100.0; T(14): 0.0; S(16): 0.0; S(18): 0.0	259	Forward	Class I
O94880	1	PHD finger protein 14 OS=Homo sapiens GN=PHF14 PE=1 SV=1 - [PHF14_HUMAN]	O94880	S302	PHD finger protein 14	PHF14 KIAA0783	QSKSNEDSLILEKSQ			SNEDpSLILEK	1	S(1): 0.0; S(5): 100.0	133	Forward	Class I
O94885	1	SAM and SH3 domain-containing protein 1 OS=Homo sapiens GN=SASH1 PE=1 SV=3 - [SASH1_HUMAN]	O94885	S90	SAM and SH3 domain-containing protein 1 (Proline-glutamate repeat-containing protein)	SASH1 KIAA0790 PEPE1	ELRKRRVSQDLEVEK	AGC/PKC	PKCz	RVpSQDLEVEKPDASPTSLQLR	1	S(3): 100.0; S(14): 0.0; T(16): 0.0; S(17): 0.0	175	Forward	Class I
O94885	1	SAM and SH3 domain-containing protein 1 OS=Homo sapiens GN=SASH1 PE=1 SV=3 - [SASH1_HUMAN]	O94885	S119	SAM and SH3 domain-containing protein 1 (Proline-glutamate repeat-containing protein)	SASH1 KIAA0790 PEPE1	EESLGFCSAVSTPEV			SQIEESLGFCpSAVSpTPEVER	2	S(1): 0.0; S(6): 0.0; S(11): 99.8; S(14): 50.1; T(15): 50.1	103	Forward	Class I
O94885	1	SAM and SH3 domain-containing protein 1 OS=Homo sapiens GN=SASH1 PE=1 SV=3 - [SASH1_HUMAN]	O94885	S135	SAM and SH3 domain-containing protein 1 (Proline-glutamate repeat-containing protein)	SASH1 KIAA0790 PEPE1	RKNPLHKSNSEDSSV			pSNSEDSSVGKGDWKK	1	S(1): 99.9; S(3): 0.1; S(6): 0.0; S(7): 0.0	122	Forward	Class I
O94885	1	SAM and SH3 domain-containing protein 1 OS=Homo sapiens GN=SASH1 PE=1 SV=3 - [SASH1_HUMAN]	O94885	S137	SAM and SH3 domain-containing protein 1 (Proline-glutamate repeat-containing protein)	SASH1 KIAA0790 PEPE1	NPLHKSNSEDSSVGK			SNpSEDSSVGKGDWK	1	S(1): 0.0; S(3): 100.0; S(6): 0.0; S(7): 0.0	262	Forward	Class I
O94885	1	SAM and SH3 domain-containing protein 1 OS=Homo sapiens GN=SASH1 PE=1 SV=3 - [SASH1_HUMAN]	O94885	S297	SAM and SH3 domain-containing protein 1 (Proline-glutamate repeat-containing protein)	SASH1 KIAA0790 PEPE1	EEHVFENSPVLDERS			KPSTEGGEEHVFENpSPVLDER	1	S(3): 0.0; T(4): 0.0; S(15): 100.0	147	Forward	Class I
O94885	1	SAM and SH3 domain-containing protein 1 OS=Homo sapiens GN=SASH1 PE=1 SV=3 - [SASH1_HUMAN]	O94885	S385	SAM and SH3 domain-containing protein 1 (Proline-glutamate repeat-containing protein)	SASH1 KIAA0790 PEPE1	EEKAQKVSRSLTEGE			VpSRSLTEGEMKK	1	S(2): 96.9; S(4): 3.1; T(6): 0.0	252	Forward	Class I
O94885	1	SAM and SH3 domain-containing protein 1 OS=Homo sapiens GN=SASH1 PE=1 SV=3 - [SASH1_HUMAN]	O94885	S387	SAM and SH3 domain-containing protein 1 (Proline-glutamate repeat-containing protein)	SASH1 KIAA0790 PEPE1	KAQKVSRSLTEGEMK			VSRpSLTEGEMKK	1	S(2): 0.0; S(4): 100.0; T(6): 0.0	279	Forward	Class I
O94885	1	SAM and SH3 domain-containing protein 1 OS=Homo sapiens GN=SASH1 PE=1 SV=3 - [SASH1_HUMAN]	O94885	T405	SAM and SH3 domain-containing protein 1 (Proline-glutamate repeat-containing protein)	SASH1 KIAA0790 PEPE1	GSLSHGRTCSFGGFD			pTCSFGGFDLTNR	1	T(1): 99.7; S(3): 0.3; T(10): 0.0	196	Forward	Class I
O94885	1	SAM and SH3 domain-containing protein 1 OS=Homo sapiens GN=SASH1 PE=1 SV=3 - [SASH1_HUMAN]	O94885	S407	SAM and SH3 domain-containing protein 1 (Proline-glutamate repeat-containing protein)	SASH1 KIAA0790 PEPE1	LSHGRTCSFGGFDLT			TCpSFGGFDLTNR	1	T(1): 0.1; S(3): 99.9; T(10): 0.0	319	Forward	Class I
O94885	1	SAM and SH3 domain-containing protein 1 OS=Homo sapiens GN=SASH1 PE=1 SV=3 - [SASH1_HUMAN]	O94885	S442	SAM and SH3 domain-containing protein 1 (Proline-glutamate repeat-containing protein)	SASH1 KIAA0790 PEPE1	VYKEVIKSPTASRIS			EVIKpSPTASR	1	S(5): 100.0; T(7): 0.0; S(9): 0.0	289	Forward	Class I
O94885	1	SAM and SH3 domain-containing protein 1 OS=Homo sapiens GN=SASH1 PE=1 SV=3 - [SASH1_HUMAN]	O94885	S490	SAM and SH3 domain-containing protein 1 (Proline-glutamate repeat-containing protein)	SASH1 KIAA0790 PEPE1	MPGSPPPSQPDPEHL			KYSSSVSEQDSGLDGMPGSPPPpSQPDPEHLDKPK	1	Y(2): 0.0; S(3): 0.0; S(4): 0.0; S(5): 0.0; S(7): 0.0; S(11): 0.3; S(19): 4.9; S(23): 94.8	64	Forward	Class I
O94885	1	SAM and SH3 domain-containing protein 1 OS=Homo sapiens GN=SASH1 PE=1 SV=3 - [SASH1_HUMAN]	O94885	S507	SAM and SH3 domain-containing protein 1 (Proline-glutamate repeat-containing protein)	SASH1 KIAA0790 PEPE1	PKLKAGGSVESLRSS			AGGpSVESLR	1	S(4): 100.0; S(7): 0.0	123	Forward	Class I
O94885;Q9NSI8	2	SAM and SH3 domain-containing protein 1 OS=Homo sapiens GN=SASH1 PE=1 SV=3 - [SASH1_HUMAN]|SAM domain-containing protein SAMSN-1 OS=Homo sapiens GN=SAMSN1 PE=2 SV=1 - [SAMN1_HUMAN]	O94885	Y570	SAM and SH3 domain-containing protein 1 (Proline-glutamate repeat-containing protein)	SASH1 KIAA0790 PEPE1	TDFTPSPYDTDSLKL			VHTDFTPSPpYDTDSLK	1	T(3): 0.0; T(6): 0.0; S(8): 0.9; Y(10): 99.1; T(12): 0.0; S(14): 0.0	172	Forward	Class I	Q9NSI8	Y179	SAM domain-containing protein SAMSN-1 (Hematopoietic adaptor containing SH3 and SAM domains 1) (Nash1) (SAM domain, SH3 domain and nuclear localization signals protein 1) (SH3-SAM adaptor protein)	SAMSN1 HACS1
O94885	1	SAM and SH3 domain-containing protein 1 OS=Homo sapiens GN=SASH1 PE=1 SV=3 - [SASH1_HUMAN]	O94885	S614	SAM and SH3 domain-containing protein 1 (Proline-glutamate repeat-containing protein)	SASH1 KIAA0790 PEPE1	FIYVDVLSEDEEKPK			FIYVDVLpSEDEEKPK	1	Y(3): 0.0; S(8): 100.0	342	Forward	Class I
O94885	1	SAM and SH3 domain-containing protein 1 OS=Homo sapiens GN=SASH1 PE=1 SV=3 - [SASH1_HUMAN]	O94885	S721	SAM and SH3 domain-containing protein 1 (Proline-glutamate repeat-containing protein)	SASH1 KIAA0790 PEPE1	SQGLSGCSPRDSGCY			LLVDSQGLSGCpSPR	1	S(5): 0.0; S(9): 0.0; S(12): 100.0	322	Forward	Class I
O94885	1	SAM and SH3 domain-containing protein 1 OS=Homo sapiens GN=SASH1 PE=1 SV=3 - [SASH1_HUMAN]	O94885	S730	SAM and SH3 domain-containing protein 1 (Proline-glutamate repeat-containing protein)	SASH1 KIAA0790 PEPE1	RDSGCYESSENLENG			DSGCYEpSSENLENGK	1	S(2): 0.0; Y(5): 0.0; S(7): 99.9; S(8): 0.1	359	Forward	Class I
O94885	1	SAM and SH3 domain-containing protein 1 OS=Homo sapiens GN=SASH1 PE=1 SV=3 - [SASH1_HUMAN]	O94885	S743	SAM and SH3 domain-containing protein 1 (Proline-glutamate repeat-containing protein)	SASH1 KIAA0790 PEPE1	NGKTRKASLLSAKSS			KApSLLSAK	1	S(3): 100.0; S(6): 0.0	68	Forward	Class I
O94885	1	SAM and SH3 domain-containing protein 1 OS=Homo sapiens GN=SASH1 PE=1 SV=3 - [SASH1_HUMAN]	O94885	S813	SAM and SH3 domain-containing protein 1 (Proline-glutamate repeat-containing protein)	SASH1 KIAA0790 PEPE1	GLNKNRRSLPVSICR	AGC/PKC	PKCz	pSLPVSICR	1	S(1): 100.0; S(5): 0.0	104	Forward	Class I
O94885	1	SAM and SH3 domain-containing protein 1 OS=Homo sapiens GN=SASH1 PE=1 SV=3 - [SASH1_HUMAN]	O94885	S821	SAM and SH3 domain-containing protein 1 (Proline-glutamate repeat-containing protein)	SASH1 KIAA0790 PEPE1	LPVSICRSCETLEGP			pSCETLEGPQTVDTWPR	1	S(1): 100.0; T(4): 0.0; T(10): 0.0; T(13): 0.0	231	Forward	Class I
O94885	1	SAM and SH3 domain-containing protein 1 OS=Homo sapiens GN=SASH1 PE=1 SV=3 - [SASH1_HUMAN]	O94885	S923	SAM and SH3 domain-containing protein 1 (Proline-glutamate repeat-containing protein)	SASH1 KIAA0790 PEPE1	AASGRGLSPPQCLPR			GLpSPPQCLPR	1	S(3): 100.0	165	Forward	Class I
O94887;Q6ZUT3	2	FERM, RhoGEF and pleckstrin domain-containing protein 2 OS=Homo sapiens GN=FARP2 PE=2 SV=3 - [FARP2_HUMAN]|FERM domain-containing protein 7 OS=Homo sapiens GN=FRMD7 PE=1 SV=1 - [FRMD7_HUMAN]	O94887	S344	FERM, RhoGEF and pleckstrin domain-containing protein 2 (FERM domain including RhoGEF) (FIR) (Pleckstrin homology domain-containing family C member 3) (PH domain-containing family C member 3)	FARP2 KIAA0793 PLEKHC3	RGSSFRYSGRTQKQL			GSSFRYpSGR	1	S(2): 0.0; S(3): 0.0; Y(6): 0.0; S(7): 100.0	108	Forward	Class I	Q6ZUT3	S302	FERM domain-containing protein 7	FRMD7
O94888	1	UBX domain-containing protein 7 OS=Homo sapiens GN=UBXD7 PE=1 SV=2 - [UBXD7_HUMAN]	O94888	S288	UBX domain-containing protein 7	UBXN7 KIAA0794 UBXD7	LIDASEDSQLEAAIR			SESLIDASEDpSQLEAAIR	1	S(1): 0.0; S(3): 0.0; S(8): 0.0; S(11): 100.0	481	Forward	Class I
O94903	1	Proline synthetase co-transcribed bacterial homolog protein OS=Homo sapiens GN=PROSC PE=1 SV=1 - [PROSC_HUMAN]	O94903	S244	Proline synthase co-transcribed bacterial homolog protein	PROSC	STNVRIGSTIFGERD			IGpSTIFGER	1	S(3): 99.9; T(4): 0.1	100	Forward	Class I
O94906	1	Pre-mRNA-processing factor 6 OS=Homo sapiens GN=PRPF6 PE=1 SV=1 - [PRP6_HUMAN]	O94906	T266	Pre-mRNA-processing factor 6 (Androgen receptor N-terminal domain-transactivating protein 1) (ANT-1) (PRP6 homolog) (U5 snRNP-associated 102 kDa protein) (U5-102 kDa protein)	PRPF6 C20orf14	SDSVSGQTVVDPKGY			LSQVSDSVSGQpTVVDPK	1	S(2): 0.0; S(5): 0.0; S(7): 0.0; S(9): 0.0; T(12): 100.0	225	Forward	Class I
O94909	1	Uncharacterized protein KIAA0819 OS=Homo sapiens GN=KIAA0819 PE=1 SV=2 - [K0819_HUMAN]	O94909	S789	Replaced by: Q7RTP6 = Protein-methionine sulfoxide oxidase MICAL3 (EC 1.14.13.-) (Molecule interacting with CasL protein 3) (MICAL-3)	MICAL3 KIAA0819 KIAA1364	GKERRPDSPTRPTLR			ERRPDpSPTRPTLR	1	S(6): 99.7; T(8): 0.3; T(11): 0.0	210	Forward	Class I
O94909	1	Uncharacterized protein KIAA0819 OS=Homo sapiens GN=KIAA0819 PE=1 SV=2 - [K0819_HUMAN]	O94909	T791	Replaced by: Q7RTP6 = Protein-methionine sulfoxide oxidase MICAL3 (EC 1.14.13.-) (Molecule interacting with CasL protein 3) (MICAL-3)	MICAL3 KIAA0819 KIAA1364	ERRPDSPTRPTLRGS			RPDSPpTRPTLR	1	S(4): 4.4; T(6): 95.6; T(9): 0.0	173	Forward	Class I
O94913	1	Pre-mRNA cleavage complex 2 protein Pcf11 OS=Homo sapiens GN=PCF11 PE=1 SV=3 - [PCF11_HUMAN]	O94913	S368	Pre-mRNA cleavage complex 2 protein Pcf11 (Pre-mRNA cleavage complex II protein Pcf11)	PCF11 KIAA0824	DSKSKSKSKSPSPLK			pSKSPpSPLK	2	S(1): 100.0; S(3): 3.9; S(5): 96.2	106	Forward	Class I
O94913	1	Pre-mRNA cleavage complex 2 protein Pcf11 OS=Homo sapiens GN=PCF11 PE=1 SV=3 - [PCF11_HUMAN]	O94913	S372	Pre-mRNA cleavage complex 2 protein Pcf11 (Pre-mRNA cleavage complex II protein Pcf11)	PCF11 KIAA0824	KSKSKSPSPLKNKLS	CMGC/CDK	CDK9	pSKSPpSPLK	2	S(1): 100.0; S(3): 3.9; S(5): 96.2	106	Forward	Class I
O94913	1	Pre-mRNA cleavage complex 2 protein Pcf11 OS=Homo sapiens GN=PCF11 PE=1 SV=3 - [PCF11_HUMAN]	O94913	S489	Pre-mRNA cleavage complex 2 protein Pcf11 (Pre-mRNA cleavage complex II protein Pcf11)	PCF11 KIAA0824	SRSPKSRSPIIHSPK	CMGC/CDK	CDK9	SRpSPIIHpSPK	2	S(1): 0.0; S(3): 100.0; S(8): 100.0	236	Forward	Class I
O94913	1	Pre-mRNA cleavage complex 2 protein Pcf11 OS=Homo sapiens GN=PCF11 PE=1 SV=3 - [PCF11_HUMAN]	O94913	S494	Pre-mRNA cleavage complex 2 protein Pcf11 (Pre-mRNA cleavage complex II protein Pcf11)	PCF11 KIAA0824	SRSPIIHSPKRRDRR	CMGC/CDK	CDK9	SRpSPIIHpSPK	2	S(1): 0.0; S(3): 100.0; S(8): 100.0	236	Forward	Class I
Q96G01;O94913	2	Protein bicaudal D homolog 1 OS=Homo sapiens GN=BICD1 PE=1 SV=2 - [BICD1_HUMAN]|Pre-mRNA cleavage complex 2 protein Pcf11 OS=Homo sapiens GN=PCF11 PE=1 SV=3 - [PCF11_HUMAN]	O94913	S633	Pre-mRNA cleavage complex 2 protein Pcf11 (Pre-mRNA cleavage complex II protein Pcf11)	PCF11 KIAA0824	SSTKGILSPRAPKQQ			GILpSPR	1	S(4): 100.0	93	Forward	Class I
O94913	1	Pre-mRNA cleavage complex 2 protein Pcf11 OS=Homo sapiens GN=PCF11 PE=1 SV=3 - [PCF11_HUMAN]	O94913	S705	Pre-mRNA cleavage complex 2 protein Pcf11 (Pre-mRNA cleavage complex II protein Pcf11)	PCF11 KIAA0824	GVREEQRSPFNDRFP	CMGC/CDK	CDK9	EEQRpSPFNDRFPLK	1	S(5): 100.0	215	Forward	Class I
O94913	1	Pre-mRNA cleavage complex 2 protein Pcf11 OS=Homo sapiens GN=PCF11 PE=1 SV=3 - [PCF11_HUMAN]	O94913	S777	Pre-mRNA cleavage complex 2 protein Pcf11 (Pre-mRNA cleavage complex II protein Pcf11)	PCF11 KIAA0824	FEGPNKLSPRIDGPP	CMGC/CDK	CDK9	MIFEGPNKLpSPR	1	S(10): 100.0	185	Forward	Class I
O94913	1	Pre-mRNA cleavage complex 2 protein Pcf11 OS=Homo sapiens GN=PCF11 PE=1 SV=3 - [PCF11_HUMAN]	O94913	S1520	Pre-mRNA cleavage complex 2 protein Pcf11 (Pre-mRNA cleavage complex II protein Pcf11)	PCF11 KIAA0824	ELQEPCDSPKVKEER	CMGC/CDK	CDK9	NELQEPCDpSPKVKEER	1	S(9): 100.0	258	Forward	Class I
O94914	1	Uncharacterized protein KIAA0825 OS=Homo sapiens GN=KIAA0825 PE=2 SV=2 - [K0825_HUMAN]	O94914	T695	Replaced by: Q8IV33 = Uncharacterized protein KIAA0825	KIAA0825 C5orf36	RIFEDRNTVELLTGA			NpTVELLpTGApSLDR	3	T(2): 100.0; T(7): 100.0; S(10): 100.0	52	Forward	Class I
O94914	1	Uncharacterized protein KIAA0825 OS=Homo sapiens GN=KIAA0825 PE=2 SV=2 - [K0825_HUMAN]	O94914	T700	Replaced by: Q8IV33 = Uncharacterized protein KIAA0825	KIAA0825 C5orf36	RNTVELLTGASLDRW			NpTVELLpTGApSLDR	3	T(2): 100.0; T(7): 100.0; S(10): 100.0	52	Forward	Class I
O94914	1	Uncharacterized protein KIAA0825 OS=Homo sapiens GN=KIAA0825 PE=2 SV=2 - [K0825_HUMAN]	O94914	S703	Replaced by: Q8IV33 = Uncharacterized protein KIAA0825	KIAA0825 C5orf36	VELLTGASLDRWSKE			NpTVELLpTGApSLDR	3	T(2): 100.0; T(7): 100.0; S(10): 100.0	52	Forward	Class I
O94915	1	Protein furry homolog-like OS=Homo sapiens GN=FRYL PE=1 SV=2 - [FRYL_HUMAN]	O94915	S1941	Protein furry homolog-like (ALL1-fused gene from chromosome 4p12 protein)	FRYL AF4P12 KIAA0826	NSNARSNSLRLSLIG			SNpSLRLSLIGDR	1	S(1): 0.0; S(3): 100.0; S(7): 0.0	333	Forward	Class I
O94915	1	Protein furry homolog-like OS=Homo sapiens GN=FRYL PE=1 SV=2 - [FRYL_HUMAN]	O94915	S1957	Protein furry homolog-like (ALL1-fused gene from chromosome 4p12 protein)	FRYL AF4P12 KIAA0826	RRGDRRRSNTLDIMD			RRpSNTLDIMDGR	1	S(3): 100.0; T(5): 0.0	273	Forward	Class I
O94915	1	Protein furry homolog-like OS=Homo sapiens GN=FRYL PE=1 SV=2 - [FRYL_HUMAN]	O94915	T1959	Protein furry homolog-like (ALL1-fused gene from chromosome 4p12 protein)	FRYL AF4P12 KIAA0826	GDRRRSNTLDIMDGR			RSNpTLDIMDGR	1	S(2): 0.0; T(4): 100.0	313	Forward	Class I
O94915	1	Protein furry homolog-like OS=Homo sapiens GN=FRYL PE=1 SV=2 - [FRYL_HUMAN]	O94915	S1972	Protein furry homolog-like (ALL1-fused gene from chromosome 4p12 protein)	FRYL AF4P12 KIAA0826	GRINHSSSLARTRSL			INHSSpSLAR	1	S(4): 0.0; S(5): 2.1; S(6): 97.9	227	Forward	Class I
O94915	1	Protein furry homolog-like OS=Homo sapiens GN=FRYL PE=1 SV=2 - [FRYL_HUMAN]	O94915	S1978	Protein furry homolog-like (ALL1-fused gene from chromosome 4p12 protein)	FRYL AF4P12 KIAA0826	SSLARTRSLSSLREK			TRpSLSpSLREK	2	T(1): 0.0; S(3): 100.0; S(5): 0.0; S(6): 100.0	236	Forward	Class I
O94915	1	Protein furry homolog-like OS=Homo sapiens GN=FRYL PE=1 SV=2 - [FRYL_HUMAN]	O94915	S1981	Protein furry homolog-like (ALL1-fused gene from chromosome 4p12 protein)	FRYL AF4P12 KIAA0826	ARTRSLSSLREKGMY			TRpSLSpSLREK	2	T(1): 0.0; S(3): 100.0; S(5): 0.0; S(6): 100.0	236	Forward	Class I
O94915	1	Protein furry homolog-like OS=Homo sapiens GN=FRYL PE=1 SV=2 - [FRYL_HUMAN]	O94915	S2272	Protein furry homolog-like (ALL1-fused gene from chromosome 4p12 protein)	FRYL AF4P12 KIAA0826	TYGGDTGSPEISFTK			TYGGDTGpSPEISFTK	1	T(1): 0.0; Y(2): 0.0; T(6): 0.0; S(8): 100.0; S(12): 0.0; T(14): 0.0	222	Forward	Class I
O94915	1	Protein furry homolog-like OS=Homo sapiens GN=FRYL PE=1 SV=2 - [FRYL_HUMAN]	O94915	S2332	Protein furry homolog-like (ALL1-fused gene from chromosome 4p12 protein)	FRYL AF4P12 KIAA0826	IAVTRSTSSTSSGSN			STpSSTSSGSNSNALVPVSWK	1	S(1): 0.5; T(2): 0.5; S(3): 98.6; S(4): 0.5; T(5): 0.0; S(6): 0.0; S(7): 0.0; S(9): 0.0; S(11): 0.0; S(18): 0.0	309	Forward	Class I
Q5TBA9;O94915	2	Protein furry homolog OS=Homo sapiens GN=FRY PE=1 SV=1 - [FRY_HUMAN]|Protein furry homolog-like OS=Homo sapiens GN=FRYL PE=1 SV=2 - [FRYL_HUMAN]	O94915	S2454	Protein furry homolog-like (ALL1-fused gene from chromosome 4p12 protein)	FRYL AF4P12 KIAA0826	NWGVRRRSLDSIDKG			RRpSLDSIDK	1	S(3): 100.0; S(6): 0.0	225	Forward	Class I
O94916	1	Nuclear factor of activated T-cells 5 OS=Homo sapiens GN=NFAT5 PE=1 SV=1 - [NFAT5_HUMAN]	O94916	S561	Nuclear factor of activated T-cells 5 (NF-AT5) (T-cell transcription factor NFAT5) (Tonicity-responsive enhancer-binding protein) (TonE-binding protein) (TonEBP)	NFAT5 KIAA0827 TONEBP	NVKKEISSPARPCSF			EISpSPARPCSFEEAMK	1	S(3): 0.0; S(4): 100.0; S(10): 0.0	287	Forward	Class I
O94921	1	Serine/threonine-protein kinase PFTAIRE-1 OS=Homo sapiens GN=PFTK1 PE=1 SV=3 - [PFTK1_HUMAN]	O94921	S24	Cyclin-dependent kinase 14 (EC 2.7.11.22) (Cell division protein kinase 14) (Serine/threonine-protein kinase PFTAIRE-1) (hPFTAIRE1)	CDK14 KIAA0834 PFTK1	KKLRRTLSESFSRIA	CAMK/MLCK	SgK085, skMLCK	TLpSESFSR	1	T(1): 0.5; S(3): 98.9; S(5): 0.5; S(7): 0.0	60	Forward	Class I
O94921	1	Serine/threonine-protein kinase PFTAIRE-1 OS=Homo sapiens GN=PFTK1 PE=1 SV=3 - [PFTK1_HUMAN]	O94921	S78	Cyclin-dependent kinase 14 (EC 2.7.11.22) (Cell division protein kinase 14) (Serine/threonine-protein kinase PFTAIRE-1) (hPFTAIRE1)	CDK14 KIAA0834 PFTK1	VRVQRTQSTFDPFEK			TQpSTFDPFEKPANQVK	1	T(1): 0.0; S(3): 100.0; T(4): 0.0	260	Forward	Class I
O94923	1	D-glucuronyl C5-epimerase OS=Homo sapiens GN=GLCE PE=1 SV=2 - [GLCE_HUMAN]	O94923	S73	D-glucuronyl C5-epimerase (EC 5.1.3.-) (Heparin/heparan sulfate:glucuronic acid C5-epimerase)	GLCE KIAA0836	NHVAKQQSEEAFPQE			QQpSEEAFPQEQQK	1	S(3): 100.0	373	Forward	Class I
O94929	1	Actin-binding LIM protein 3 OS=Homo sapiens GN=ABLIM3 PE=1 SV=3 - [ABLM3_HUMAN]	O94929	S280	Actin-binding LIM protein 3 (abLIM-3) (Actin-binding LIM protein family member 3)	ABLIM3 KIAA0843 HMFN1661	HRRTSETSISPPGSS			TSETpSISPPGSSIGSPNR	1	T(1): 0.0; S(2): 0.0; T(4): 0.4; S(5): 99.2; S(7): 0.4; S(11): 0.0; S(12): 0.0; S(15): 0.0	190	Forward	Class I
O94929	1	Actin-binding LIM protein 3 OS=Homo sapiens GN=ABLIM3 PE=1 SV=3 - [ABLM3_HUMAN]	O94929	S282	Actin-binding LIM protein 3 (abLIM-3) (Actin-binding LIM protein family member 3)	ABLIM3 KIAA0843 HMFN1661	RTSETSISPPGSSIG			TSETSIpSPPGSSIGSPNR	1	T(1): 0.0; S(2): 0.0; T(4): 0.0; S(5): 0.5; S(7): 99.5; S(11): 0.0; S(12): 0.0; S(15): 0.0	240	Forward	Class I
O94929	1	Actin-binding LIM protein 3 OS=Homo sapiens GN=ABLIM3 PE=1 SV=3 - [ABLM3_HUMAN]	O94929	S373	Actin-binding LIM protein 3 (abLIM-3) (Actin-binding LIM protein family member 3)	ABLIM3 KIAA0843 HMFN1661	LRQRRASSPGYIDSP			RASpSPGYIDSPTYSR	1	S(3): 0.0; S(4): 100.0; Y(7): 0.0; S(10): 0.0; T(12): 0.0; Y(13): 0.0; S(14): 0.0	359	Forward	Class I
O94929	1	Actin-binding LIM protein 3 OS=Homo sapiens GN=ABLIM3 PE=1 SV=3 - [ABLM3_HUMAN]	O94929	S379	Actin-binding LIM protein 3 (abLIM-3) (Actin-binding LIM protein family member 3)	ABLIM3 KIAA0843 HMFN1661	SSPGYIDSPTYSRQG			ASpSPGYIDpSPTYSR	2	S(2): 0.3; S(3): 99.7; Y(6): 0.0; S(9): 100.0; T(11): 0.0; Y(12): 0.0; S(13): 0.0	235	Forward	Class I
O94929	1	Actin-binding LIM protein 3 OS=Homo sapiens GN=ABLIM3 PE=1 SV=3 - [ABLM3_HUMAN]	O94929	S388	Actin-binding LIM protein 3 (abLIM-3) (Actin-binding LIM protein family member 3)	ABLIM3 KIAA0843 HMFN1661	TYSRQGMSPTFSRSP			QGMpSPTFSRpSPHHYYR	2	S(4): 100.0; T(6): 0.0; S(8): 5.4; S(10): 94.6; Y(14): 0.0; Y(15): 0.0	186	Forward	Class I
O94929	1	Actin-binding LIM protein 3 OS=Homo sapiens GN=ABLIM3 PE=1 SV=3 - [ABLM3_HUMAN]	O94929	S394	Actin-binding LIM protein 3 (abLIM-3) (Actin-binding LIM protein family member 3)	ABLIM3 KIAA0843 HMFN1661	MSPTFSRSPHHYYRS			QGMpSPTFSRpSPHHYYR	2	S(4): 100.0; T(6): 0.0; S(8): 5.4; S(10): 94.6; Y(14): 0.0; Y(15): 0.0	186	Forward	Class I
O94929	1	Actin-binding LIM protein 3 OS=Homo sapiens GN=ABLIM3 PE=1 SV=3 - [ABLM3_HUMAN]	O94929	S493	Actin-binding LIM protein 3 (abLIM-3) (Actin-binding LIM protein family member 3)	ABLIM3 KIAA0843 HMFN1661	EYWTYHGSPKVPRAR			YSPIYSPDPYYASESEYWTYHGpSPK	1	Y(1): 0.0; S(2): 0.0; Y(5): 0.0; S(6): 0.0; Y(10): 0.0; Y(11): 0.0; S(13): 0.0; S(15): 0.0; Y(17): 0.0; T(19): 0.0; Y(20): 0.0; S(23): 100.0	253	Forward	Class I
O94929	1	Actin-binding LIM protein 3 OS=Homo sapiens GN=ABLIM3 PE=1 SV=3 - [ABLM3_HUMAN]	O94929	S503	Actin-binding LIM protein 3 (abLIM-3) (Actin-binding LIM protein family member 3)	ABLIM3 KIAA0843 HMFN1661	VPRARRFSSGGEEDD			RFpSSGGEEDDFDR	1	S(3): 100.0; S(4): 0.0	330	Forward	Class I
O94929	1	Actin-binding LIM protein 3 OS=Homo sapiens GN=ABLIM3 PE=1 SV=3 - [ABLM3_HUMAN]	O94929	S504	Actin-binding LIM protein 3 (abLIM-3) (Actin-binding LIM protein family member 3)	ABLIM3 KIAA0843 HMFN1661	PRARRFSSGGEEDDF			RFSpSGGEEDDFDR	1	S(3): 0.0; S(4): 100.0	326	Forward	Class I
O94929	1	Actin-binding LIM protein 3 OS=Homo sapiens GN=ABLIM3 PE=1 SV=3 - [ABLM3_HUMAN]	O94929	S567	Actin-binding LIM protein 3 (abLIM-3) (Actin-binding LIM protein family member 3)	ABLIM3 KIAA0843 HMFN1661	YEMSLNGSPRSHYLA			EALHTAGYEMSLNGpSPR	1	T(5): 0.0; Y(8): 0.0; S(11): 0.0; S(15): 100.0	444	Forward	Class I
O94929	1	Actin-binding LIM protein 3 OS=Homo sapiens GN=ABLIM3 PE=1 SV=3 - [ABLM3_HUMAN]	O94929	S576	Actin-binding LIM protein 3 (abLIM-3) (Actin-binding LIM protein family member 3)	ABLIM3 KIAA0843 HMFN1661	RSHYLADSDPLISKS			SHYLADpSDPLISK	1	S(1): 0.0; Y(3): 0.0; S(7): 100.0; S(12): 0.0	261	Forward	Class I
O94929	1	Actin-binding LIM protein 3 OS=Homo sapiens GN=ABLIM3 PE=1 SV=3 - [ABLM3_HUMAN]	O94929	S585	Actin-binding LIM protein 3 (abLIM-3) (Actin-binding LIM protein family member 3)	ABLIM3 KIAA0843 HMFN1661	PLISKSASLPAYRRN			SApSLPAYR	1	S(1): 0.0; S(3): 100.0; Y(7): 0.0	91	Forward	Class I
O94964	1	Uncharacterized protein C20orf117 OS=Homo sapiens GN=C20orf117 PE=1 SV=1 - [CT117_HUMAN]	O94964	S432	Uncharacterized protein KIAA0889	KIAA0889 C20orf117	NVCGRAPSPTSSAGE			APpSPTSSAGEEGTK	1	S(3): 99.1; T(5): 0.8; S(6): 0.1; S(7): 0.0; T(13): 0.0	69	Forward	Class I
O94966	1	Ubiquitin carboxyl-terminal hydrolase 19 OS=Homo sapiens GN=USP19 PE=1 SV=2 - [UBP19_HUMAN]	O94966	S244	Ubiquitin carboxyl-terminal hydrolase 19 (EC 3.4.19.12) (Deubiquitinating enzyme 19) (Ubiquitin thioesterase 19) (Ubiquitin-specific-processing protease 19) (Zinc finger MYND domain-containing protein 9)	USP19 KIAA0891 ZMYND9	PPGNDPVSPAMVRSR	CMGC/CDK/CDC2	CDC2	AVPPGNDPVpSPAMVR	1	S(10): 100.0	96	Forward	Class I
O94967	1	WD repeat-containing protein 47 OS=Homo sapiens GN=WDR47 PE=1 SV=1 - [WDR47_HUMAN]	O94967	S312	WD repeat-containing protein 47	WDR47 KIAA0893	ADAYMTRSLNPALDG			pSLNPALDGLTCGLTSHDK	1	S(1): 100.0; T(10): 0.0; T(14): 0.0; S(15): 0.0	270	Forward	Class I
O94967	1	WD repeat-containing protein 47 OS=Homo sapiens GN=WDR47 PE=1 SV=1 - [WDR47_HUMAN]	O94967	S422	WD repeat-containing protein 47	WDR47 KIAA0893	EKNELRDSTEQFQEY			NELRDpSTEQFQEYYR	1	S(6): 100.0; T(7): 0.0; Y(13): 0.0; Y(14): 0.0	364	Forward	Class I
O94979	1	Protein transport protein Sec31A OS=Homo sapiens GN=SEC31A PE=1 SV=3 - [SC31A_HUMAN]	O94979	S527	Protein transport protein Sec31A (ABP125) (ABP130) (SEC31-like protein 1) (SEC31-related protein A) (Web1-like protein)	SEC31A KIAA0905 SEC31L1 HSPC275 HSPC334	DSDQVAQSDGEESPA			DSDQVAQpSDGEESPAAEEQLLGEHIK	1	S(2): 0.0; S(8): 100.0; S(13): 0.0	312	Forward	Class I
O94979	1	Protein transport protein Sec31A OS=Homo sapiens GN=SEC31A PE=1 SV=3 - [SC31A_HUMAN]	O94979	S799	Protein transport protein Sec31A (ABP125) (ABP130) (SEC31-like protein 1) (SEC31-related protein A) (Web1-like protein)	SEC31A KIAA0905 SEC31L1 HSPC275 HSPC334	EPVAGHESPKIPYEK			AQGEPVAGHEpSPKIPYEK	1	S(11): 100.0; Y(16): 0.0	303	Forward	Class I
O94979	1	Protein transport protein Sec31A OS=Homo sapiens GN=SEC31A PE=1 SV=3 - [SC31A_HUMAN]	O94979	S1163	Protein transport protein Sec31A (ABP125) (ABP130) (SEC31-like protein 1) (SEC31-related protein A) (Web1-like protein)	SEC31A KIAA0905 SEC31L1 HSPC275 HSPC334	KLREQTLSPTITSGL			LREQTLpSPTITSGLHNIAR	1	T(5): 0.0; S(7): 100.0; T(9): 0.0; T(11): 0.0; S(12): 0.0	347	Forward	Class I
O94989	1	Rho guanine nucleotide exchange factor 15 OS=Homo sapiens GN=ARHGEF15 PE=1 SV=3 - [ARHGF_HUMAN]	O94989	S26	Rho guanine nucleotide exchange factor 15 (Ephexin-5) (E5) (Vsm-RhoGEF)	ARHGEF15 KIAA0915	IIRPRPPSRSRAAQS			IIRPRPPpSR	1	S(8): 100.0	132	Forward	Class I
O94989	1	Rho guanine nucleotide exchange factor 15 OS=Homo sapiens GN=ARHGEF15 PE=1 SV=3 - [ARHGF_HUMAN]	O94989	S33	Rho guanine nucleotide exchange factor 15 (Ephexin-5) (E5) (Vsm-RhoGEF)	ARHGEF15 KIAA0915	SRSRAAQSPGPPHNG			AAQpSPGPPHNGSpSPQELPR	2	S(4): 100.0; S(12): 0.0; S(13): 100.0	217	Forward	Class I
O94989	1	Rho guanine nucleotide exchange factor 15 OS=Homo sapiens GN=ARHGEF15 PE=1 SV=3 - [ARHGF_HUMAN]	O94989	S41	Rho guanine nucleotide exchange factor 15 (Ephexin-5) (E5) (Vsm-RhoGEF)	ARHGEF15 KIAA0915	PGPPHNGSSPQELPR			AAQSPGPPHNGpSSPQELPR	1	S(4): 0.0; S(12): 99.7; S(13): 0.3	127	Forward	Class I
O94989	1	Rho guanine nucleotide exchange factor 15 OS=Homo sapiens GN=ARHGEF15 PE=1 SV=3 - [ARHGF_HUMAN]	O94989	S42	Rho guanine nucleotide exchange factor 15 (Ephexin-5) (E5) (Vsm-RhoGEF)	ARHGEF15 KIAA0915	GPPHNGSSPQELPRN			AAQSPGPPHNGSpSPQELPR	1	S(4): 0.0; S(12): 0.3; S(13): 99.7	238	Forward	Class I
O95072	1	Meiotic recombination protein REC8 homolog OS=Homo sapiens GN=REC8 PE=2 SV=1 - [REC8_HUMAN]	O95072	S398	Meiotic recombination protein REC8 homolog (Cohesin Rec8p)	REC8 REC8L1	RRKIEVPSEIEVPRE			IEVPpSEIEVPR	1	S(5): 100.0	95	Forward	Class I
O95104	1	Splicing factor, arginine/serine-rich 15 OS=Homo sapiens GN=SFRS15 PE=1 SV=3 - [SFR15_HUMAN]	O95104	T236	Splicing factor, arginine/serine-rich 15 (CTD-binding SR-like protein RA4) (SR-related and CTD-associated factor 4)	SCAF4 KIAA1172 SFRS15	AITAQLKTTPTQPSE			pTTPTQPSEQK	1	T(1): 99.5; T(2): 0.5; T(4): 0.0; S(7): 0.0	140	Forward	Class I
O95104	1	Splicing factor, arginine/serine-rich 15 OS=Homo sapiens GN=SFRS15 PE=1 SV=3 - [SFR15_HUMAN]	O95104	T237	Splicing factor, arginine/serine-rich 15 (CTD-binding SR-like protein RA4) (SR-related and CTD-associated factor 4)	SCAF4 KIAA1172 SFRS15	ITAQLKTTPTQPSEQ			TpTPTQPSEQK	1	T(1): 4.8; T(2): 94.9; T(4): 0.3; S(7): 0.0	77	Forward	Class I
O95104	1	Splicing factor, arginine/serine-rich 15 OS=Homo sapiens GN=SFRS15 PE=1 SV=3 - [SFR15_HUMAN]	O95104	S1004	Splicing factor, arginine/serine-rich 15 (CTD-binding SR-like protein RA4) (SR-related and CTD-associated factor 4)	SCAF4 KIAA1172 SFRS15	QERFGRRSFGNRVEN			pSFGNRVENDRER	1	S(1): 100.0	178	Forward	Class I
O95149	1	Snurportin-1 OS=Homo sapiens GN=SNUPN PE=1 SV=1 - [SPN1_HUMAN]	O95149	S350	Snurportin-1 (RNA U transporter 1)	SNUPN RNUT1 SPN1	KLKGSSHSPDHPGCL			GSSHpSPDHPGCLMEN	1	S(2): 0.0; S(3): 0.0; S(5): 100.0	92	Forward	Class I
O95155	1	Ubiquitin conjugation factor E4 B OS=Homo sapiens GN=UBE4B PE=1 SV=1 - [UBE4B_HUMAN]	O95155	S105	Ubiquitin conjugation factor E4 B (Homozygously deleted in neuroblastoma 1) (Ubiquitin fusion degradation protein 2)	UBE4B HDNB1 KIAA0684 UFD2	QSLSRSQSMDIDGVS			SQpSMDIDGVSCEK	1	S(1): 0.3; S(3): 99.7; S(10): 0.0	212	Forward	Class I
O95208	1	Epsin-2 OS=Homo sapiens GN=EPN2 PE=1 SV=2 - [EPN2_HUMAN]	O95208	Y17	Epsin-2 (EPS-15-interacting protein 2)	EPN2 KIAA1065	MKNIVNNYSEAEIKV			NIVNNpYpSEAEIK	2	Y(6): 100.0; S(7): 100.0	121	Forward	Class I
O95208	1	Epsin-2 OS=Homo sapiens GN=EPN2 PE=1 SV=2 - [EPN2_HUMAN]	O95208	S18	Epsin-2 (EPS-15-interacting protein 2)	EPN2 KIAA1065	KNIVNNYSEAEIKVR			NIVNNpYpSEAEIK	2	Y(6): 100.0; S(7): 100.0	121	Forward	Class I
O95208	1	Epsin-2 OS=Homo sapiens GN=EPN2 PE=1 SV=2 - [EPN2_HUMAN]	O95208	S172	Epsin-2 (EPS-15-interacting protein 2)	EPN2 KIAA1065	QITFGRGSSQPNLST			GpSSQPNLSTSHSEQEYGK	1	S(2): 95.8; S(3): 4.2; S(8): 0.0; T(9): 0.0; S(10): 0.0; S(12): 0.0; Y(16): 0.0	303	Forward	Class I
O95208	1	Epsin-2 OS=Homo sapiens GN=EPN2 PE=1 SV=2 - [EPN2_HUMAN]	O95208	S173	Epsin-2 (EPS-15-interacting protein 2)	EPN2 KIAA1065	ITFGRGSSQPNLSTS			GSpSQPNLSTSHSEQEYGK	1	S(2): 0.5; S(3): 99.5; S(8): 0.0; T(9): 0.0; S(10): 0.0; S(12): 0.0; Y(16): 0.0	323	Forward	Class I
O95208	1	Epsin-2 OS=Homo sapiens GN=EPN2 PE=1 SV=2 - [EPN2_HUMAN]	O95208	S178	Epsin-2 (EPS-15-interacting protein 2)	EPN2 KIAA1065	GSSQPNLSTSHSEQE			GSSQPNLpSTSHSEQEYGK	1	S(2): 4.7; S(3): 4.7; S(8): 81.1; T(9): 4.7; S(10): 4.7; S(12): 0.3; Y(16): 0.0	92	Forward	Class I
O95218	1	Zinc finger Ran-binding domain-containing protein 2 OS=Homo sapiens GN=ZRANB2 PE=1 SV=2 - [ZRAB2_HUMAN]	O95218	Y114	Zinc finger Ran-binding domain-containing protein 2 (Zinc finger protein 265) (Zinc finger, splicing)	ZRANB2 ZIS ZNF265	NERENVEYIEREESD			ENVEpYIEREESDGEYDEFGRK	1	Y(5): 99.0; S(11): 0.5; Y(15): 0.5	95	Forward	Class I
O95218	1	Zinc finger Ran-binding domain-containing protein 2 OS=Homo sapiens GN=ZRANB2 PE=1 SV=2 - [ZRAB2_HUMAN]	O95218	S120	Zinc finger Ran-binding domain-containing protein 2 (Zinc finger protein 265) (Zinc finger, splicing)	ZRANB2 ZIS ZNF265	EYIEREESDGEYDEF			ENVEYIEREEpSDGEYDEFGRK	1	Y(5): 0.0; S(11): 99.2; Y(15): 0.8	214	Forward	Class I
O95218	1	Zinc finger Ran-binding domain-containing protein 2 OS=Homo sapiens GN=ZRANB2 PE=1 SV=2 - [ZRAB2_HUMAN]	O95218	S153	Zinc finger Ran-binding domain-containing protein 2 (Zinc finger protein 265) (Zinc finger, splicing)	ZRANB2 ZIS ZNF265	KEVEDKESEGEEEDE			EVEDKEpSEGEEEDEDEDLSK	1	S(7): 100.0; S(19): 0.0	338	Forward	Class I
O95218	1	Zinc finger Ran-binding domain-containing protein 2 OS=Homo sapiens GN=ZRANB2 PE=1 SV=2 - [ZRAB2_HUMAN]	O95218	S188	Zinc finger Ran-binding domain-containing protein 2 (Zinc finger protein 265) (Zinc finger, splicing)	ZRANB2 ZIS ZNF265	SKYNLDASEEEDSNK			YNLDApSEEEDSNK	1	Y(1): 0.0; S(6): 100.0; S(11): 0.0	354	Forward	Class I
O95232	1	Cisplatin resistance-associated overexpressed protein OS=Homo sapiens GN=CROP PE=1 SV=2 - [CROP_HUMAN]	O95232	S425	Luc7-like protein 3 (Cisplatin resistance-associated-overexpressed protein) (Luc7A) (Okadaic acid-inducible phosphoprotein OA48-18) (cAMP regulatory element-associated protein 1) (CRE-associated protein 1) (CREAP-1)	LUC7L3 CREAP1 CROP O48	GTSEDIKSEGDTQSN	CMGC	CLK1, SRPK1, SRPK2	ESDTKNEVNGTSEDIKpSEGDTQSN	1	S(2): 0.0; T(4): 0.0; T(11): 0.0; S(12): 0.0; S(17): 100.0; T(21): 0.0; S(23): 0.0	206	Forward	Class I
O95232	1	Cisplatin resistance-associated overexpressed protein OS=Homo sapiens GN=CROP PE=1 SV=2 - [CROP_HUMAN]	O95232	S431	Luc7-like protein 3 (Cisplatin resistance-associated-overexpressed protein) (Luc7A) (Okadaic acid-inducible phosphoprotein OA48-18) (cAMP regulatory element-associated protein 1) (CRE-associated protein 1) (CREAP-1)	LUC7L3 CREAP1 CROP O48	KSEGDTQSN******	CMGC	CLK1, SRPK1, SRPK2	ESDTKNEVNGTSEDIKSEGDTQpSN	1	S(2): 0.0; T(4): 0.0; T(11): 0.0; S(12): 0.0; S(17): 0.0; T(21): 0.0; S(23): 100.0	166	Forward	Class I
O95235	1	Kinesin-like protein KIF20A OS=Homo sapiens GN=KIF20A PE=1 SV=1 - [KI20A_HUMAN]	O95235	S532	Kinesin-like protein KIF20A (GG10_2) (Mitotic kinesin-like protein 2) (MKlp2) (Rab6-interacting kinesin-like protein) (Rabkinesin-6)	KIF20A MKLP2 RAB6KIFL	KEHSLQVSPSLEKGA	Other/PLK	PLK1	EHSLQVpSPSLEK	1	S(3): 0.0; S(7): 100.0; S(9): 0.0	172	Forward	Class I
O95239;Q2VIQ3	2	Chromosome-associated kinesin KIF4A OS=Homo sapiens GN=KIF4A PE=1 SV=3 - [KIF4A_HUMAN]|Chromosome-associated kinesin KIF4B OS=Homo sapiens GN=KIF4B PE=1 SV=2 - [KIF4B_HUMAN]	O95239	T250	Chromosome-associated kinesin KIF4A (Chromokinesin-A)	KIF4A KIF4	GSERQKKTKAEGDRL			pTKAEGDRLK	1	T(1): 100.0	100	Forward	Class I	Q2VIQ3	T250	Chromosome-associated kinesin KIF4B (Chromokinesin-B)	KIF4B
O95239	1	Chromosome-associated kinesin KIF4A OS=Homo sapiens GN=KIF4A PE=1 SV=3 - [KIF4A_HUMAN]	O95239	T799	Chromosome-associated kinesin KIF4A (Chromokinesin-A)	KIF4A KIF4	PPKLRRRTFSLTEVR	CAMK/DAPK	DAPK3	pTFSLTEVR	1	T(1): 100.0; S(3): 0.0; T(5): 0.0	117	Forward	Class I
O95239	1	Chromosome-associated kinesin KIF4A OS=Homo sapiens GN=KIF4A PE=1 SV=3 - [KIF4A_HUMAN]	O95239	S801	Chromosome-associated kinesin KIF4A (Chromokinesin-A)	KIF4A KIF4	KLRRRTFSLTEVRGQ	AGC/AKT	AKT1	TFpSLTEVR	1	T(1): 0.0; S(3): 99.6; T(5): 0.4	69	Forward	Class I
O95239;Q2VIQ3	2	Chromosome-associated kinesin KIF4A OS=Homo sapiens GN=KIF4A PE=1 SV=3 - [KIF4A_HUMAN]|Chromosome-associated kinesin KIF4B OS=Homo sapiens GN=KIF4B PE=1 SV=2 - [KIF4B_HUMAN]	O95239	S1225	Chromosome-associated kinesin KIF4A (Chromokinesin-A)	KIF4A KIF4	TSFFSGCSPIEEEAH			RALASNTSFFSGCpSPIEEEAH	1	S(5): 0.0; T(7): 0.0; S(8): 0.0; S(11): 0.0; S(14): 100.0	330	Forward	Class I	Q2VIQ3	S1227	Chromosome-associated kinesin KIF4B (Chromokinesin-B)	KIF4B
O95248	1	Myotubularin-related protein 5 OS=Homo sapiens GN=SBF1 PE=1 SV=3 - [MTMR5_HUMAN]	O95248	T1137	Myotubularin-related protein 5 (SET-binding factor 1) (Sbf1)	SBF1 MTMR5	YQRLGLGTLSSSLSR			LGLGpTLSSSLSR	1	T(5): 100.0; S(7): 0.0; S(8): 0.0; S(9): 0.0; S(11): 0.0	209	Forward	Class I
O95251	1	Histone acetyltransferase MYST2 OS=Homo sapiens GN=MYST2 PE=1 SV=1 - [MYST2_HUMAN]	O95251	S50	Histone acetyltransferase KAT7 (EC 2.3.1.48) (Histone acetyltransferase binding to ORC1) (Lysine acetyltransferase 7) (MOZ, YBF2/SAS3, SAS2 and TIP60 protein 2) (MYST-2)	KAT7 HBO1 HBOa MYST2	TRSSARLSQSSQDSS	Atypical/PIKK/ATM	ATM	SSARLpSQSSQDSpSPVR	2	S(1): 0.0; S(2): 0.0; S(6): 100.0; S(8): 0.0; S(9): 0.0; S(12): 0.0; S(13): 100.0	118	Forward	Class I
O95251	1	Histone acetyltransferase MYST2 OS=Homo sapiens GN=MYST2 PE=1 SV=1 - [MYST2_HUMAN]	O95251	S57	Histone acetyltransferase KAT7 (EC 2.3.1.48) (Histone acetyltransferase binding to ORC1) (Lysine acetyltransferase 7) (MOZ, YBF2/SAS3, SAS2 and TIP60 protein 2) (MYST-2)	KAT7 HBO1 HBOa MYST2	SQSSQDSSPVRNLQS	CMGC/CDK/CDC2	CDC2	LSQSSQDSpSPVR	1	S(2): 0.0; S(4): 0.0; S(5): 0.0; S(8): 0.6; S(9): 99.4	216	Forward	Class I
O95251	1	Histone acetyltransferase MYST2 OS=Homo sapiens GN=MYST2 PE=1 SV=1 - [MYST2_HUMAN]	O95251	T88	Histone acetyltransferase KAT7 (EC 2.3.1.48) (Histone acetyltransferase binding to ORC1) (Lysine acetyltransferase 7) (MOZ, YBF2/SAS3, SAS2 and TIP60 protein 2) (MYST-2)	KAT7 HBO1 HBOa MYST2	QQQPTPVTPKKYPLR	CMGC/CDK/CDC2	CDC2	SQQQPTPVpTPK	1	S(1): 0.0; T(6): 0.7; T(9): 99.3	106	Forward	Class I
O95251	1	Histone acetyltransferase MYST2 OS=Homo sapiens GN=MYST2 PE=1 SV=1 - [MYST2_HUMAN]	O95251	S162	Histone acetyltransferase KAT7 (EC 2.3.1.48) (Histone acetyltransferase binding to ORC1) (Lysine acetyltransferase 7) (MOZ, YBF2/SAS3, SAS2 and TIP60 protein 2) (MYST-2)	KAT7 HBO1 HBOa MYST2	KDMSLKDSGSDLSHR			DMSLKDpSGSDLSHRPK	1	S(3): 0.0; S(7): 94.4; S(9): 5.6; S(12): 0.0	177	Forward	Class I
O95251	1	Histone acetyltransferase MYST2 OS=Homo sapiens GN=MYST2 PE=1 SV=1 - [MYST2_HUMAN]	O95251	S164	Histone acetyltransferase KAT7 (EC 2.3.1.48) (Histone acetyltransferase binding to ORC1) (Lysine acetyltransferase 7) (MOZ, YBF2/SAS3, SAS2 and TIP60 protein 2) (MYST-2)	KAT7 HBO1 HBOa MYST2	MSLKDSGSDLSHRPK			DMSLKDSGpSDLSHRPK	1	S(3): 0.0; S(7): 0.1; S(9): 99.9; S(12): 0.0	154	Forward	Class I
O95292	1	Vesicle-associated membrane protein-associated protein B/C OS=Homo sapiens GN=VAPB PE=1 SV=3 - [VAPB_HUMAN]	O95292	S156	Vesicle-associated membrane protein-associated protein B/C (VAMP-B/VAMP-C) (VAMP-associated protein B/C) (VAP-B/VAP-C)	VAPB UNQ484/PRO983	ETPIVSKSLSSSLDD			pSLSSSLDDTEVK	1	S(1): 99.5; S(3): 0.5; S(4): 0.0; S(5): 0.0; T(9): 0.0	131	Forward	Class I
O95292	1	Vesicle-associated membrane protein-associated protein B/C OS=Homo sapiens GN=VAPB PE=1 SV=3 - [VAPB_HUMAN]	O95292	S158	Vesicle-associated membrane protein-associated protein B/C (VAMP-B/VAMP-C) (VAMP-associated protein B/C) (VAP-B/VAP-C)	VAPB UNQ484/PRO983	PIVSKSLSSSLDDTE			SLpSSSLDDTEVK	1	S(1): 0.0; S(3): 100.0; S(4): 0.0; S(5): 0.0; T(9): 0.0	222	Forward	Class I
O95292	1	Vesicle-associated membrane protein-associated protein B/C OS=Homo sapiens GN=VAPB PE=1 SV=3 - [VAPB_HUMAN]	O95292	S160	Vesicle-associated membrane protein-associated protein B/C (VAMP-B/VAMP-C) (VAMP-associated protein B/C) (VAP-B/VAP-C)	VAPB UNQ484/PRO983	VSKSLSSSLDDTEVK	STE/STE11	MAP3K5	SLSSpSLDDTEVKK	1	S(1): 0.0; S(3): 0.0; S(4): 0.0; S(5): 100.0; T(9): 0.0	245	Forward	Class I
O95295	1	SNARE-associated protein Snapin OS=Homo sapiens GN=SNAPIN PE=1 SV=1 - [SNAPN_HUMAN]	O95295	S133	SNARE-associated protein Snapin (Synaptosomal-associated protein 25-binding protein) (SNAP-associated protein)	SNAPIN SNAP25BP SNAPAP	SGIYPPGSPGK****	CMGC/MAPK	p38a	AMLDSGIYPPGpSPGK	1	S(5): 0.0; Y(8): 0.0; S(12): 100.0	241	Forward	Class I
O95297	1	Myelin protein zero-like protein 1 OS=Homo sapiens GN=MPZL1 PE=1 SV=1 - [MPZL1_HUMAN]	O95297	S210	Myelin protein zero-like protein 1 (Protein zero-related)	MPZL1 PZR UNQ849/PRO1787	CSTSESLSPVKQAPR	CMGC/MAPK	Erk1	DYTGCSTSESLpSPVK	1	Y(2): 0.0; T(3): 0.0; S(6): 0.0; T(7): 0.0; S(8): 0.0; S(10): 1.1; S(12): 98.8	138	Forward	Class I
O95340	1	Bifunctional 3'-phosphoadenosine 5'-phosphosulfate synthetase 2 OS=Homo sapiens GN=PAPSS2 PE=1 SV=2 - [PAPS2_HUMAN]	O95340	S92	Bifunctional 3'-phosphoadenosine 5'-phosphosulfate synthase 2 (PAPS synthase 2) (PAPSS 2) (Sulfurylase kinase 2) (SK 2) (SK2) [Includes: Sulfate adenylyltransferase (EC 2.7.7.4) (ATP-sulfurylase) (Sulfate adenylate transferase) (SAT); Adenylyl-sulfate kinase (EC 2.7.1.25) (3'-phosphoadenosine-5'-phosphosulfate synthase) (APS kinase) (Adenosine-5'-phosphosulfate 3'-phosphotransferase) (Adenylylsul…	PAPSS2 ATPSK2	LNRNLGFSPGDREEN			NLGFpSPGDREENIRR	1	S(5): 100.0	260	Forward	Class I
O95359	1	Transforming acidic coiled-coil-containing protein 2 OS=Homo sapiens GN=TACC2 PE=1 SV=3 - [TACC2_HUMAN]	O95359	S2072	Transforming acidic coiled-coil-containing protein 2 (Anti-Zuai-1) (AZU-1)	TACC2	KVNTRRKSTDSVPIS	AGC	PKN1	RKpSTDSVPISK	1	S(3): 99.9; T(4): 0.1; S(6): 0.0; S(10): 0.0	111	Forward	Class I
O95359	1	Transforming acidic coiled-coil-containing protein 2 OS=Homo sapiens GN=TACC2 PE=1 SV=3 - [TACC2_HUMAN]	O95359	S2226	Transforming acidic coiled-coil-containing protein 2 (Anti-Zuai-1) (AZU-1)	TACC2	GGGRVQNSPPVGRKT	CMGC/CDK	PCTAIRE2	VQNpSPPVGRK	1	S(4): 100.0	173	Forward	Class I
O95359	1	Transforming acidic coiled-coil-containing protein 2 OS=Homo sapiens GN=TACC2 PE=1 SV=3 - [TACC2_HUMAN]	O95359	S2317	Transforming acidic coiled-coil-containing protein 2 (Anti-Zuai-1) (AZU-1)	TACC2	KLDNTPASPPRSPAE	CMGC/CDK	PCTAIRE2	LDNTPApSPPRSPAEPNDIPIAK	1	T(4): 0.0; S(7): 100.0; S(11): 0.0	173	Forward	Class I
O95359	1	Transforming acidic coiled-coil-containing protein 2 OS=Homo sapiens GN=TACC2 PE=1 SV=3 - [TACC2_HUMAN]	O95359	S2321	Transforming acidic coiled-coil-containing protein 2 (Anti-Zuai-1) (AZU-1)	TACC2	TPASPPRSPAEPNDI	CMGC/CDK	PCTAIRE2	LDNTPApSPPRpSPAEPNDIPIAK	2	T(4): 1.1; S(7): 98.9; S(11): 100.0	169	Forward	Class I
O95359	1	Transforming acidic coiled-coil-containing protein 2 OS=Homo sapiens GN=TACC2 PE=1 SV=3 - [TACC2_HUMAN]	O95359	S2359	Transforming acidic coiled-coil-containing protein 2 (Anti-Zuai-1) (AZU-1)	TACC2	STSKMQESPKLPQQS	CMGC/CDK	PCTAIRE2	MQEpSPKLPQQSYNFDPDTCDESVDPFK	1	S(4): 100.0; S(11): 0.0; Y(12): 0.0; T(18): 0.0; S(22): 0.0	308	Forward	Class I
O95359	1	Transforming acidic coiled-coil-containing protein 2 OS=Homo sapiens GN=TACC2 PE=1 SV=3 - [TACC2_HUMAN]	O95359	S2569	Transforming acidic coiled-coil-containing protein 2 (Anti-Zuai-1) (AZU-1)	TACC2	SPVRMSESPTPCSGS	CMGC/CDK	PCTAIRE2	MSEpSPTPCSGSSFEETEALVNTAAK	1	S(2): 0.6; S(4): 98.9; T(6): 0.6; S(9): 0.0; S(11): 0.0; S(12): 0.0; T(16): 0.0; T(22): 0.0	407	Forward	Class I
O95365	1	Zinc finger and BTB domain-containing protein 7A OS=Homo sapiens GN=ZBTB7A PE=1 SV=1 - [ZBT7A_HUMAN]	O95365	S337	Zinc finger and BTB domain-containing protein 7A (Factor binding IST protein 1) (FBI-1) (Factor that binds to inducer of short transcripts protein 1) (HIV-1 1st-binding protein 1) (Leukemia/lymphoma-related factor) (POZ and Krueppel erythroid myeloid ontogenic factor) (POK erythroid myeloid ontogenic factor) (Pokemon) (TTF-I-interacting peptide 21) (TIP21) (Zinc finger protein 857A)	ZBTB7A FBI1 LRF ZBTB7 ZNF857A	AGAAAGDSDEESRAD			AGAAAGDpSDEESRADDKGVMDYYLK	1	S(8): 100.0; S(12): 0.0; Y(22): 0.0; Y(23): 0.0	213	Forward	Class I
O95365	1	Zinc finger and BTB domain-containing protein 7A OS=Homo sapiens GN=ZBTB7A PE=1 SV=1 - [ZBT7A_HUMAN]	O95365	S549	Zinc finger and BTB domain-containing protein 7A (Factor binding IST protein 1) (FBI-1) (Factor that binds to inducer of short transcripts protein 1) (HIV-1 1st-binding protein 1) (Leukemia/lymphoma-related factor) (POZ and Krueppel erythroid myeloid ontogenic factor) (POK erythroid myeloid ontogenic factor) (Pokemon) (TTF-I-interacting peptide 21) (TIP21) (Zinc finger protein 857A)	ZBTB7A FBI1 LRF ZBTB7 ZNF857A	DEDEDVASPDGLGRL	CMGC/CDK/CDC2	CDK2	HFKDEDEDEDVApSPDGLGR	1	S(13): 100.0	355	Forward	Class I
O95390	1	Growth/differentiation factor 11 OS=Homo sapiens GN=GDF11 PE=2 SV=1 - [GDF11_HUMAN]	O95390	S378	Growth/differentiation factor 11 (GDF-11) (Bone morphogenetic protein 11) (BMP-11)	GDF11 BMP11	CCTPTKMSPINMLYF			MpSPINMLYFNDK	1	S(2): 100.0; Y(8): 0.0	108	Forward	Class I
O95391	1	Pre-mRNA-splicing factor SLU7 OS=Homo sapiens GN=SLU7 PE=1 SV=1 - [SLU7_HUMAN]	O95391	S215	Pre-mRNA-splicing factor SLU7 (hSlu7)	SLU7	KLVEQANSPKHQWGE			LVEQANpSPKHQWGEEEPNSQTEK	1	S(7): 100.0; S(19): 0.0; T(21): 0.0	244	Forward	Class I
O95394	1	Phosphoacetylglucosamine mutase OS=Homo sapiens GN=PGM3 PE=1 SV=1 - [AGM1_HUMAN]	O95394	T62	Phosphoacetylglucosamine mutase (PAGM) (EC 5.4.2.3) (Acetylglucosamine phosphomutase) (N-acetylglucosamine-phosphate mutase) (Phosphoglucomutase-3) (PGM 3)	PGM3 AGM1	STIGVMVTASHNPEE			STIGVMVpTASHNPEEDNGVK	1	S(1): 0.0; T(2): 0.0; T(8): 99.5; S(10): 0.5	281	Forward	Class I
O95394	1	Phosphoacetylglucosamine mutase OS=Homo sapiens GN=PGM3 PE=1 SV=1 - [AGM1_HUMAN]	O95394	S64	Phosphoacetylglucosamine mutase (PAGM) (EC 5.4.2.3) (Acetylglucosamine phosphomutase) (N-acetylglucosamine-phosphate mutase) (Phosphoglucomutase-3) (PGM 3)	PGM3 AGM1	IGVMVTASHNPEEDN			STIGVMVTApSHNPEEDNGVK	1	S(1): 0.0; T(2): 0.0; T(8): 0.0; S(10): 100.0	398	Forward	Class I
O95398	1	Rap guanine nucleotide exchange factor 3 OS=Homo sapiens GN=RAPGEF3 PE=1 SV=3 - [RPGF3_HUMAN]	O95398	S528	Rap guanine nucleotide exchange factor 3 (Exchange factor directly activated by cAMP 1) (Exchange protein directly activated by cAMP 1) (EPAC 1) (Rap1 guanine-nucleotide-exchange factor directly activated by cAMP) (cAMP-regulated guanine nucleotide exchange factor I) (cAMP-GEFI)	RAPGEF3 CGEF1 EPAC EPAC1	ENGCGNASPQMKARN			LENGCGNApSPQMK	1	S(9): 100.0	96	Forward	Class I
O95398	1	Rap guanine nucleotide exchange factor 3 OS=Homo sapiens GN=RAPGEF3 PE=1 SV=3 - [RPGF3_HUMAN]	O95398	S864	Rap guanine nucleotide exchange factor 3 (Exchange factor directly activated by cAMP 1) (Exchange protein directly activated by cAMP 1) (EPAC 1) (Rap1 guanine-nucleotide-exchange factor directly activated by cAMP) (cAMP-regulated guanine nucleotide exchange factor I) (cAMP-GEFI)	RAPGEF3 CGEF1 EPAC EPAC1	SHNPVPLSPLRSRVS			SHNPVPLpSPLR	1	S(1): 0.0; S(8): 100.0	153	Forward	Class I
O95400	1	CD2 antigen cytoplasmic tail-binding protein 2 OS=Homo sapiens GN=CD2BP2 PE=1 SV=1 - [CD2B2_HUMAN]	O95400	S195	CD2 antigen cytoplasmic tail-binding protein 2 (CD2 cytoplasmic domain-binding protein 2) (CD2 tail-binding protein 2)	CD2BP2 KIAA1178	KGPGQPSSPQRLDRL			KGPGQPSpSPQRLDR	1	S(7): 0.0; S(8): 100.0	310	Forward	Class I
O95402	1	Mediator of RNA polymerase II transcription subunit 26 OS=Homo sapiens GN=MED26 PE=1 SV=2 - [MED26_HUMAN]	O95402	S389	Mediator of RNA polymerase II transcription subunit 26 (Activator-recruited cofactor 70 kDa component) (ARC70) (Cofactor required for Sp1 transcriptional activation subunit 7) (CRSP complex subunit 7) (Mediator complex subunit 26) (Transcriptional coactivator CRSP70)	MED26 ARC70 CRSP7	DAASSGGSDSKKKKR			ADSDAASSGGpSDSKK	1	S(3): 0.0; S(7): 0.0; S(8): 0.4; S(11): 99.2; S(13): 0.4	59	Forward	Class I
O95402	1	Mediator of RNA polymerase II transcription subunit 26 OS=Homo sapiens GN=MED26 PE=1 SV=2 - [MED26_HUMAN]	O95402	S391	Mediator of RNA polymerase II transcription subunit 26 (Activator-recruited cofactor 70 kDa component) (ARC70) (Cofactor required for Sp1 transcriptional activation subunit 7) (CRSP complex subunit 7) (Mediator complex subunit 26) (Transcriptional coactivator CRSP70)	MED26 ARC70 CRSP7	ASSGGSDSKKKKRYR			ADSDAASSGGSDpSKKK	1	S(3): 0.0; S(7): 0.0; S(8): 0.0; S(11): 0.6; S(13): 99.4	68	Forward	Class I
O95402	1	Mediator of RNA polymerase II transcription subunit 26 OS=Homo sapiens GN=MED26 PE=1 SV=2 - [MED26_HUMAN]	O95402	S447	Mediator of RNA polymerase II transcription subunit 26 (Activator-recruited cofactor 70 kDa component) (ARC70) (Cofactor required for Sp1 transcriptional activation subunit 7) (CRSP complex subunit 7) (Mediator complex subunit 26) (Transcriptional coactivator CRSP70)	MED26 ARC70 CRSP7	KEPVRADSPVHMEQQ	CMGC/CDK	CDK11, CDK8	EPVRADpSPVHMEQQSR	1	S(7): 100.0; S(15): 0.0	315	Forward	Class I
O95425	1	Supervillin OS=Homo sapiens GN=SVIL PE=1 SV=1 - [SVIL_HUMAN]	O95425	S50	Supervillin (Archvillin) (p205/p250)	SVIL	MRASDPASPHIGRSN	CMGC/MAPK	Erk1	ASDPApSPHIGR	1	S(2): 0.0; S(6): 100.0	181	Forward	Class I
O95425	1	Supervillin OS=Homo sapiens GN=SVIL PE=1 SV=1 - [SVIL_HUMAN]	O95425	S221	Supervillin (Archvillin) (p205/p250)	SVIL	TRQAHDLSPAAESSS	CMGC/MAPK	Erk1	QAHDLpSPAAESSSTFSFSGR	1	S(6): 100.0; S(11): 0.0; S(12): 0.0; S(13): 0.0; T(14): 0.0; S(16): 0.0; S(18): 0.0	304	Forward	Class I
O95425	1	Supervillin OS=Homo sapiens GN=SVIL PE=1 SV=1 - [SVIL_HUMAN]	O95425	S245	Supervillin (Archvillin) (p205/p250)	SVIL	SFTEVPRSPKHAHSS	CMGC/MAPK	Erk1	DSSFTEVPRpSPK	1	S(2): 0.0; S(3): 0.0; T(5): 0.0; S(10): 100.0	248	Forward	Class I
O95425	1	Supervillin OS=Homo sapiens GN=SVIL PE=1 SV=1 - [SVIL_HUMAN]	O95425	S270	Supervillin (Archvillin) (p205/p250)	SVIL	SFGDPQLSPEARPST	CMGC/MAPK	Erk1	SPSFGDPQLpSPEARPSTGKPK	1	S(1): 1.5; S(3): 1.5; S(10): 95.4; S(16): 1.5; T(17): 0.0	62	Forward	Class I
O95425	1	Supervillin OS=Homo sapiens GN=SVIL PE=1 SV=1 - [SVIL_HUMAN]	O95425	S547	Supervillin (Archvillin) (p205/p250)	SVIL	KRKVRTRSLSDFTGP			pSLSDFTGPPQLQALK	1	S(1): 100.0; S(3): 0.0; T(6): 0.0	256	Forward	Class I
O95425	1	Supervillin OS=Homo sapiens GN=SVIL PE=1 SV=1 - [SVIL_HUMAN]	O95425	S549	Supervillin (Archvillin) (p205/p250)	SVIL	KVRTRSLSDFTGPPQ			SLpSDFTGPPQLQALK	1	S(1): 0.0; S(3): 100.0; T(6): 0.0	302	Forward	Class I
O95425	1	Supervillin OS=Homo sapiens GN=SVIL PE=1 SV=1 - [SVIL_HUMAN]	O95425	T657	Supervillin (Archvillin) (p205/p250)	SVIL	KTSERFRTQPITSAE	AGC/AKT	AKT1	FRpTQPITSAERK	1	T(3): 100.0; T(7): 0.0; S(8): 0.0	262	Forward	Class I
O95425	1	Supervillin OS=Homo sapiens GN=SVIL PE=1 SV=1 - [SVIL_HUMAN]	O95425	S673	Supervillin (Archvillin) (p205/p250)	SVIL	KESDRCTSHSETPTV	AGC/AKT	AKT1	CTpSHSETPTVDDEEK	1	T(2): 0.1; S(3): 99.9; S(5): 0.0; T(7): 0.0; T(9): 0.0	321	Forward	Class I
O95425	1	Supervillin OS=Homo sapiens GN=SVIL PE=1 SV=1 - [SVIL_HUMAN]	O95425	S707	Supervillin (Archvillin) (p205/p250)	SVIL	LFREMEKSFDEQNVP	AGC/AKT	AKT1	pSFDEQNVPK	1	S(1): 100.0	221	Forward	Class I
O95425	1	Supervillin OS=Homo sapiens GN=SVIL PE=1 SV=1 - [SVIL_HUMAN]	O95425	Y850	Supervillin (Archvillin) (p205/p250)	SVIL	QRRMNARYQTQPVTL			pYQTQPVTLGEVEQVQSGK	1	Y(1): 93.5; T(3): 3.3; T(7): 3.3; S(16): 0.0	118	Forward	Class I
O95425	1	Supervillin OS=Homo sapiens GN=SVIL PE=1 SV=1 - [SVIL_HUMAN]	O95425	T852	Supervillin (Archvillin) (p205/p250)	SVIL	RMNARYQTQPVTLGE	AGC/AKT	AKT1	YQpTQPVTLGEVEQVQSGK	1	Y(1): 0.0; T(3): 100.0; T(7): 0.0; S(16): 0.0	369	Forward	Class I
O95425	1	Supervillin OS=Homo sapiens GN=SVIL PE=1 SV=1 - [SVIL_HUMAN]	O95425	S920	Supervillin (Archvillin) (p205/p250)	SVIL	SSIENSDSPVRSILK	CMGC/MAPK	Erk1	FSSSIENSDpSPVR	1	S(2): 0.0; S(3): 0.0; S(4): 0.0; S(8): 0.0; S(10): 100.0	150	Forward	Class I
O95425	1	Supervillin OS=Homo sapiens GN=SVIL PE=1 SV=1 - [SVIL_HUMAN]	O95425	Y966	Supervillin (Archvillin) (p205/p250)	SVIL	RDSGMEKYGSFEEAE	TK/Src	SRC	pYGSFEEAEASYPILNR	1	Y(1): 99.6; S(3): 0.4; S(10): 0.0; Y(11): 0.0	104	Forward	Class I
O95425	1	Supervillin OS=Homo sapiens GN=SVIL PE=1 SV=1 - [SVIL_HUMAN]	O95425	S968	Supervillin (Archvillin) (p205/p250)	SVIL	SGMEKYGSFEEAEAS			YGpSFEEAEASYPILNR	1	Y(1): 0.0; S(3): 100.0; S(10): 0.0; Y(11): 0.0	376	Forward	Class I
O95453	1	Poly(A)-specific ribonuclease PARN OS=Homo sapiens GN=PARN PE=1 SV=1 - [PARN_HUMAN]	O95453	S557	Poly(A)-specific ribonuclease PARN (EC 3.1.13.4) (Deadenylating nuclease) (Deadenylation nuclease) (Polyadenylate-specific ribonuclease)	PARN DAN	NHYYRNNSFTAPSTV			NNpSFTAPSTVGK	1	S(3): 100.0; T(5): 0.0; S(8): 0.0; T(9): 0.0	85	Forward	Class I
O95453	1	Poly(A)-specific ribonuclease PARN OS=Homo sapiens GN=PARN PE=1 SV=1 - [PARN_HUMAN]	O95453	S619	Poly(A)-specific ribonuclease PARN (EC 3.1.13.4) (Deadenylating nuclease) (Deadenylation nuclease) (Polyadenylate-specific ribonuclease)	PARN DAN	KRMKKELSPAGSISK	CMGC/CDK/CDC2	CDC2	ELpSPAGSISK	1	S(3): 100.0; S(7): 0.0; S(9): 0.0	170	Forward	Class I
O95453	1	Poly(A)-specific ribonuclease PARN OS=Homo sapiens GN=PARN PE=1 SV=1 - [PARN_HUMAN]	O95453	S623	Poly(A)-specific ribonuclease PARN (EC 3.1.13.4) (Deadenylating nuclease) (Deadenylation nuclease) (Polyadenylate-specific ribonuclease)	PARN DAN	KELSPAGSISKNSPA			ELpSPAGpSISK	2	S(3): 100.0; S(7): 100.0; S(9): 0.0	86	Forward	Class I
O95490	1	Latrophilin-2 OS=Homo sapiens GN=LPHN2 PE=2 SV=2 - [LPHN2_HUMAN]	O95490	S1430	Latrophilin-2 (Calcium-independent alpha-latrotoxin receptor 2) (CIRL-2) (Latrophilin homolog 1) (Lectomedin-1)	LPHN2 KIAA0786 LEC1 LPHH1	YQISRGNSDGYIIPI			GNpSDGYIIPINK	1	S(3): 100.0; Y(6): 0.0	335	Forward	Class I
O95503	1	Chromobox protein homolog 6 OS=Homo sapiens GN=CBX6 PE=1 SV=1 - [CBX6_HUMAN]	O95503	S107	Chromobox protein homolog 6	CBX6	KPSASASSPKLHSSA			ISDVHFSVKPSASASpSPK	1	S(2): 0.0; S(7): 0.0; S(11): 0.0; S(13): 0.0; S(15): 0.0; S(16): 100.0	273	Forward	Class I
O95544	1	NAD kinase OS=Homo sapiens GN=NADK PE=1 SV=1 - [NADK_HUMAN]	O95544	S46	NAD kinase (EC 2.7.1.23) (Poly(P)/ATP NAD kinase)	NADK	RGRAKSRSLSASPAL			pSLSASPALGSTK	1	S(1): 99.6; S(3): 0.4; S(5): 0.0; S(10): 0.0; T(11): 0.0	224	Forward	Class I
O95544	1	NAD kinase OS=Homo sapiens GN=NADK PE=1 SV=1 - [NADK_HUMAN]	O95544	S48	NAD kinase (EC 2.7.1.23) (Poly(P)/ATP NAD kinase)	NADK	RAKSRSLSASPALGS			SLpSASPALGSTK	1	S(1): 0.5; S(3): 99.5; S(5): 0.0; S(10): 0.0; T(11): 0.0	246	Forward	Class I
O95544	1	NAD kinase OS=Homo sapiens GN=NADK PE=1 SV=1 - [NADK_HUMAN]	O95544	S50	NAD kinase (EC 2.7.1.23) (Poly(P)/ATP NAD kinase)	NADK	KSRSLSASPALGSTK			SRpSLSApSPALGSTK	2	S(1): 0.3; S(3): 99.7; S(5): 0.0; S(7): 100.0; S(12): 0.0; T(13): 0.0	217	Forward	Class I
O95544	1	NAD kinase OS=Homo sapiens GN=NADK PE=1 SV=1 - [NADK_HUMAN]	O95544	S64	NAD kinase (EC 2.7.1.23) (Poly(P)/ATP NAD kinase)	NADK	KEFRRTRSLHGPCPV			TRpSLHGPCPVTTFGPK	1	T(1): 0.4; S(3): 99.6; T(11): 0.0; T(12): 0.0	165	Forward	Class I
O95568	1	UPF0558 protein C1orf156 OS=Homo sapiens GN=C1orf156 PE=1 SV=1 - [CA156_HUMAN]	O95568	S96	Histidine protein methyltransferase 1 homolog (EC 2.1.1.-) (Arsenic-transactivated protein 2) (AsTP2) (Methyltransferase-like protein 18)	METTL18 ASTP2 C1orf156	EPHGKQPSLRAAKEH			NLEPHGKQPpSLR	1	S(10): 100.0	96	Forward	Class I
O95613	1	Pericentrin OS=Homo sapiens GN=PCNT PE=1 SV=3 - [PCNT_HUMAN]	O95613	S2963	Pericentrin (Kendrin) (Pericentrin-B)	PCNT KIAA0402 PCNT2	SARRAAGSDADHLRE			AAGpSDADHLR	1	S(4): 100.0	111	Forward	Class I
O95613	1	Pericentrin OS=Homo sapiens GN=PCNT PE=1 SV=3 - [PCNT_HUMAN]	O95613	S3242	Pericentrin (Kendrin) (Pericentrin-B)	PCNT KIAA0402 PCNT2	PRARQPQSPPRTRES			ARQPQpSPPRTR	1	S(6): 100.0; T(10): 0.0	202	Forward	Class I
O95613	1	Pericentrin OS=Homo sapiens GN=PCNT PE=1 SV=3 - [PCNT_HUMAN]	O95613	S3274	Pericentrin (Kendrin) (Pericentrin-B)	PCNT KIAA0402 PCNT2	RRLAAAASPHSGGRA			RLAAAApSPHSGGR	1	S(7): 99.9; S(10): 0.1	74	Forward	Class I
O95628	1	CCR4-NOT transcription complex subunit 4 OS=Homo sapiens GN=CNOT4 PE=1 SV=3 - [CNOT4_HUMAN]	O95628	S432	CCR4-NOT transcription complex subunit 4 (EC 6.3.2.-) (CCR4-associated factor 4) (E3 ubiquitin-protein ligase CNOT4) (Potential transcriptional repressor NOT4Hp)	CNOT4 NOT4	VQDQPSLSPTSLQNS			ELSVQDQPSLpSPTSLQNSSSHTTTAK	1	S(3): 0.0; S(9): 0.0; S(11): 100.0; T(13): 0.0; S(14): 0.0; S(18): 0.0; S(19): 0.0; S(20): 0.0; T(22): 0.0; T(23): 0.0; T(24): 0.0	283	Forward	Class I
O95630	1	STAM-binding protein OS=Homo sapiens GN=STAMBP PE=1 SV=1 - [STABP_HUMAN]	O95630	Y114	STAM-binding protein (EC 3.4.19.-) (Associated molecule with the SH3 domain of STAM) (Endosome-associated ubiquitin isopeptidase)	STAMBP AMSH	KAELLKRYTKEYTEY			pYTKEYTEYNEEK	1	Y(1): 100.0; T(2): 0.0; Y(5): 0.0; T(6): 0.0; Y(8): 0.0	198	Forward	Class I
O95639	1	Cleavage and polyadenylation specificity factor subunit 4 OS=Homo sapiens GN=CPSF4 PE=1 SV=1 - [CPSF4_HUMAN]	O95639	S202	Cleavage and polyadenylation specificity factor subunit 4 (Cleavage and polyadenylation specificity factor 30 kDa subunit) (CPSF 30 kDa subunit) (NS1 effector domain-binding protein 1) (Neb-1) (No arches homolog)	CPSF4 CPSF30 NAR NEB1	PPLQRSSSLIQLTSQ	CAMK/MAPKAPK	MAPKAPK2	SSpSLIQLTSQNSSPNQQR	1	S(1): 3.8; S(2): 3.8; S(3): 92.4; T(8): 0.0; S(9): 0.0; S(12): 0.0; S(13): 0.0	230	Forward	Class I
O95639	1	Cleavage and polyadenylation specificity factor subunit 4 OS=Homo sapiens GN=CPSF4 PE=1 SV=1 - [CPSF4_HUMAN]	O95639	S212	Cleavage and polyadenylation specificity factor subunit 4 (Cleavage and polyadenylation specificity factor 30 kDa subunit) (CPSF 30 kDa subunit) (NS1 effector domain-binding protein 1) (Neb-1) (No arches homolog)	CPSF4 CPSF30 NAR NEB1	QLTSQNSSPNQQRTP	CAMK/MAPKAPK	MAPKAPK2	SSSLIQLTSQNSpSPNQQR	1	S(1): 0.0; S(2): 0.0; S(3): 0.0; T(8): 0.0; S(9): 0.0; S(12): 0.0; S(13): 100.0	262	Forward	Class I
O95671	1	N-acetylserotonin O-methyltransferase-like protein OS=Homo sapiens GN=ASMTL PE=1 SV=3 - [ASML_HUMAN]	O95671	S21	N-acetylserotonin O-methyltransferase-like protein (ASMTL)	ASMTL	RVVLASASPRRQEIL			RVVLASApSPR	1	S(6): 0.0; S(8): 100.0	63	Forward	Class I
O95671	1	N-acetylserotonin O-methyltransferase-like protein OS=Homo sapiens GN=ASMTL PE=1 SV=3 - [ASML_HUMAN]	O95671	S239	N-acetylserotonin O-methyltransferase-like protein (ASMTL)	ASMTL	ADTFEDLSDVEGGGS			SVKHDSIPAADTFEDLpSDVEGGGSEPTQR	1	S(1): 0.0; S(6): 0.0; T(12): 0.0; S(17): 100.0; S(24): 0.0; T(27): 0.0	407	Forward	Class I
O95671	1	N-acetylserotonin O-methyltransferase-like protein OS=Homo sapiens GN=ASMTL PE=1 SV=3 - [ASML_HUMAN]	O95671	S421	N-acetylserotonin O-methyltransferase-like protein (ASMTL)	ASMTL	FQDAYYQSPETRLRF			KAEDLFQDAYYQpSPETR	1	Y(10): 0.0; Y(11): 0.0; S(13): 100.0; T(16): 0.0	262	Forward	Class I
O95674	1	Phosphatidate cytidylyltransferase 2 OS=Homo sapiens GN=CDS2 PE=1 SV=1 - [CDS2_HUMAN]	O95674	S21	Phosphatidate cytidylyltransferase 2 (EC 2.7.7.41) (CDP-DAG synthase 2) (CDP-DG synthase 2) (CDP-diacylglycerol synthase 2) (CDS 2) (CDP-diglyceride pyrophosphorylase 2) (CDP-diglyceride synthase 2) (CTP:phosphatidate cytidylyltransferase 2)	CDS2	APPEDKESESEAKVD			VAHEPVAPPEDKEpSESEAK	1	S(14): 98.4; S(16): 1.6	102	Forward	Class I
O95678	1	Keratin, type II cytoskeletal 75 OS=Homo sapiens GN=KRT75 PE=1 SV=1 - [K2C75_HUMAN]	O95678	S6	Keratin, type II cytoskeletal 75 (Cytokeratin-75) (CK-75) (Keratin-6 hair follicle) (hK6hf) (Keratin-75) (K75) (Type II keratin-K6hf) (Type-II keratin Kb18)	KRT75 K6HF KB18	**MSRQSSITFQSGS			QSpSITFQpSGpSRR	3	S(2): 0.6; S(3): 92.6; T(5): 7.4; S(8): 99.4; S(10): 100.0	107	Forward	Class I
O95678	1	Keratin, type II cytoskeletal 75 OS=Homo sapiens GN=KRT75 PE=1 SV=1 - [K2C75_HUMAN]	O95678	S11	Keratin, type II cytoskeletal 75 (Cytokeratin-75) (CK-75) (Keratin-6 hair follicle) (hK6hf) (Keratin-75) (K75) (Type II keratin-K6hf) (Type-II keratin Kb18)	KRT75 K6HF KB18	QSSITFQSGSRRGFS			QSpSITFQpSGpSRR	3	S(2): 0.6; S(3): 92.6; T(5): 7.4; S(8): 99.4; S(10): 100.0	107	Forward	Class I
O95678	1	Keratin, type II cytoskeletal 75 OS=Homo sapiens GN=KRT75 PE=1 SV=1 - [K2C75_HUMAN]	O95678	S13	Keratin, type II cytoskeletal 75 (Cytokeratin-75) (CK-75) (Keratin-6 hair follicle) (hK6hf) (Keratin-75) (K75) (Type II keratin-K6hf) (Type-II keratin Kb18)	KRT75 K6HF KB18	SITFQSGSRRGFSTT			QSpSITFQpSGpSRR	3	S(2): 0.6; S(3): 92.6; T(5): 7.4; S(8): 99.4; S(10): 100.0	107	Forward	Class I
O95684	1	FGFR1 oncogene partner OS=Homo sapiens GN=FGFR1OP PE=1 SV=1 - [FR1OP_HUMAN]	O95684	S152	FGFR1 oncogene partner	FGFR1OP FOP	GEGALDLSDVHSPPK	Other/NEK	NEK2	EKGPTTGEGALDLpSDVHSPPKpSPEGK	2	T(5): 0.0; T(6): 0.0; S(14): 96.3; S(18): 3.7; S(22): 100.0	102	Forward	Class I
O95684	1	FGFR1 oncogene partner OS=Homo sapiens GN=FGFR1OP PE=1 SV=1 - [FR1OP_HUMAN]	O95684	S156	FGFR1 oncogene partner	FGFR1OP FOP	LDLSDVHSPPKSPEG	CMGC/CDK/CDC2	CDC2	GPTTGEGALDLSDVHpSPPKpSPEGK	2	T(3): 0.0; T(4): 0.0; S(12): 0.0; S(16): 100.0; S(20): 100.0	178	Forward	Class I
O95684	1	FGFR1 oncogene partner OS=Homo sapiens GN=FGFR1OP PE=1 SV=1 - [FR1OP_HUMAN]	O95684	S160	FGFR1 oncogene partner	FGFR1OP FOP	DVHSPPKSPEGKTSA	CMGC/CDK/CDC2	CDC2	GPTTGEGALDLSDVHpSPPKpSPEGK	2	T(3): 0.0; T(4): 0.0; S(12): 0.0; S(16): 100.0; S(20): 100.0	178	Forward	Class I
O95685	1	Protein phosphatase 1 regulatory subunit 3D OS=Homo sapiens GN=PPP1R3D PE=1 SV=1 - [PPR3D_HUMAN]	O95685	S25	Protein phosphatase 1 regulatory subunit 3D (Protein phosphatase 1 regulatory subunit 6) (PP1 subunit R6) (Protein phosphatase 1-binding subunit R6)	PPP1R3D PPP1R6	KLGPRSLSCLSDLDG	CAMK/CAMK2	CaMK2g	SLpSCLSDLDGGVALEPR	1	S(1): 0.3; S(3): 99.7; S(6): 0.0	247	Forward	Class I
O95685	1	Protein phosphatase 1 regulatory subunit 3D OS=Homo sapiens GN=PPP1R3D PE=1 SV=1 - [PPR3D_HUMAN]	O95685	S74	Protein phosphatase 1 regulatory subunit 3D (Protein phosphatase 1 regulatory subunit 6) (PP1 subunit R6) (Protein phosphatase 1-binding subunit R6)	PPP1R3D PPP1R6	IILRRARSLPSSPER	CAMK/CAMK2	CaMK2g	ARpSLPSpSPERR	2	S(3): 100.0; S(6): 50.0; S(7): 50.0	134	Forward	Class I
O95685	1	Protein phosphatase 1 regulatory subunit 3D OS=Homo sapiens GN=PPP1R3D PE=1 SV=1 - [PPR3D_HUMAN]	O95685	S78	Protein phosphatase 1 regulatory subunit 3D (Protein phosphatase 1 regulatory subunit 6) (PP1 subunit R6) (Protein phosphatase 1-binding subunit R6)	PPP1R3D PPP1R6	RARSLPSSPERRQKA	CMGC/CDK	CDK5	ARpSLPSpSPERR	2	S(3): 100.0; S(6): 0.0; S(7): 100.0	109	Forward	Class I
O95696	1	Bromodomain-containing protein 1 OS=Homo sapiens GN=BRD1 PE=1 SV=1 - [BRD1_HUMAN]	O95696	S803	Bromodomain-containing protein 1 (BR140-like protein) (Bromodomain and PHD finger-containing protein 2)	BRD1 BRL BRPF2	QPRKRSRSTCGDSEV			SRpSTCGDSEVEEESPGK	1	S(1): 0.0; S(3): 100.0; T(4): 0.0; S(8): 0.0; S(14): 0.0	294	Forward	Class I
O95696	1	Bromodomain-containing protein 1 OS=Homo sapiens GN=BRD1 PE=1 SV=1 - [BRD1_HUMAN]	O95696	S852	Bromodomain-containing protein 1 (BR140-like protein) (Bromodomain and PHD finger-containing protein 2)	BRD1 BRL BRPF2	TPRRRCASESSISSS			CApSESSISSSNSPLCDSSFNAPK	1	S(3): 99.1; S(5): 0.9; S(6): 0.0; S(8): 0.0; S(9): 0.0; S(10): 0.0; S(12): 0.0; S(17): 0.0; S(18): 0.0	284	Forward	Class I
O95714	1	Probable E3 ubiquitin-protein ligase HERC2 OS=Homo sapiens GN=HERC2 PE=1 SV=1 - [HERC2_HUMAN]	O95714	T333	E3 ubiquitin-protein ligase HERC2 (EC 6.3.2.-) (HECT domain and RCC1-like domain-containing protein 2)	HERC2	NERSAQGTSAPLLPL			SAQGpTSAPLLPLLQR	1	S(1): 0.0; T(5): 99.2; S(6): 0.7	76	Forward	Class I
O95714	1	Probable E3 ubiquitin-protein ligase HERC2 OS=Homo sapiens GN=HERC2 PE=1 SV=1 - [HERC2_HUMAN]	O95714	S2928	E3 ubiquitin-protein ligase HERC2 (EC 6.3.2.-) (HECT domain and RCC1-like domain-containing protein 2)	HERC2	AAVPFLASDNEEEED			IRAEEEDLAAVPFLApSDNEEEEDEK	1	S(16): 100.0	280	Forward	Class I
O95747	1	Serine/threonine-protein kinase OSR1 OS=Homo sapiens GN=OXSR1 PE=1 SV=1 - [OXSR1_HUMAN]	O95747	S339	Serine/threonine-protein kinase OSR1 (EC 2.7.11.1) (Oxidative stress-responsive 1 protein)	OXSR1 KIAA1101 OSR1	EDGGWEWSDDEFDEE			TEDGGWEWpSDDEFDEESEEGK	1	T(1): 0.0; S(9): 100.0; S(17): 0.0	418	Forward	Class I
O95747	1	Serine/threonine-protein kinase OSR1 OS=Homo sapiens GN=OXSR1 PE=1 SV=1 - [OXSR1_HUMAN]	O95747	S359	Serine/threonine-protein kinase OSR1 (EC 2.7.11.1) (Oxidative stress-responsive 1 protein)	OXSR1 KIAA1101 OSR1	AAISQLRSPRVKESI			AAISQLRpSPR	1	S(4): 0.3; S(8): 99.7	73	Forward	Class I
O95757	1	Heat shock 70 kDa protein 4L OS=Homo sapiens GN=HSPA4L PE=1 SV=2 - [HS74L_HUMAN]	O95757	S599	Heat shock 70 kDa protein 4L (Heat shock 70-related protein APG-1) (Osmotic stress protein 94)	HSPA4L APG1 OSP94	LGQDLLNSYIENEGK			QLGQDLLNpSYIENEGK	1	S(9): 98.4; Y(10): 1.6	121	Forward	Class I
O95766	1	UPF0550 protein C7orf28 OS=Homo sapiens GN=C7orf28A PE=1 SV=1 - [CG028_HUMAN]	O95766	S266	Replaced by: P86790;P86791 = Vacuolar fusion protein CCZ1 homolog B (Vacuolar fusion protein CCZ1 homolog-like) | Vacuolar fusion protein CCZ1 homolog	CCZ1B C7orf28B | CCZ1 C7orf28A CGI-43	PELAGRDSPIRAEMP			HIEPELAGRDpSPIR	1	S(11): 100.0	242	Forward	Class I
O95772	1	MLN64 N-terminal domain homolog OS=Homo sapiens GN=STARD3NL PE=1 SV=1 - [MENTO_HUMAN]	O95772	S39	MLN64 N-terminal domain homolog (STARD3 N-terminal-like protein)	STARD3NL MENTHO UNQ855/PRO1864	QLMARIESYEGREKK			IEpSYEGREK	1	S(3): 100.0; Y(4): 0.0	241	Forward	Class I
O95772	1	MLN64 N-terminal domain homolog OS=Homo sapiens GN=STARD3NL PE=1 SV=1 - [MENTO_HUMAN]	O95772	S193	MLN64 N-terminal domain homolog (STARD3 N-terminal-like protein)	STARD3NL MENTHO UNQ855/PRO1864	LLIVQDASERAALIP			LLIVQDApSER	1	S(8): 100.0	133	Forward	Class I
O95785	1	Protein Wiz OS=Homo sapiens GN=WIZ PE=1 SV=2 - [WIZ_HUMAN]	O95785	S996	Protein Wiz (Widely-interspaced zinc finger-containing protein) (Zinc finger protein 803)	WIZ ZNF803	TPLALAGSPTPKNPE			KTPLALAGpSPTPK	1	T(2): 0.0; S(9): 100.0; T(11): 0.0	197	Forward	Class I
O95785	1	Protein Wiz OS=Homo sapiens GN=WIZ PE=1 SV=2 - [WIZ_HUMAN]	O95785	S1010	Protein Wiz (Widely-interspaced zinc finger-containing protein) (Zinc finger protein 803)	WIZ ZNF803	EDKSPQLSLSPRPAS			SPQLpSLSPRPApSPK	2	S(1): 6.6; S(5): 86.9; S(7): 6.6; S(12): 100.0	50	Forward	Class I
O95785	1	Protein Wiz OS=Homo sapiens GN=WIZ PE=1 SV=2 - [WIZ_HUMAN]	O95785	S1012	Protein Wiz (Widely-interspaced zinc finger-containing protein) (Zinc finger protein 803)	WIZ ZNF803	KSPQLSLSPRPASPK			SPQLSLpSPRPApSPK	2	S(1): 0.0; S(5): 0.0; S(7): 100.0; S(12): 100.0	217	Forward	Class I
O95785	1	Protein Wiz OS=Homo sapiens GN=WIZ PE=1 SV=2 - [WIZ_HUMAN]	O95785	S1017	Protein Wiz (Widely-interspaced zinc finger-containing protein) (Zinc finger protein 803)	WIZ ZNF803	SLSPRPASPKAQWPQ			NPEDKSPQLSLSPRPApSPK	1	S(6): 0.0; S(10): 0.0; S(12): 0.0; S(17): 100.0	277	Forward	Class I
O95793	1	Double-stranded RNA-binding protein Staufen homolog 1 OS=Homo sapiens GN=STAU1 PE=1 SV=2 - [STAU1_HUMAN]	O95793	S390	Double-stranded RNA-binding protein Staufen homolog 1	STAU1 STAU	VTFFEPGSGDENGTS			VTFFEPGpSGDENGTSNKEDEFR	1	T(2): 0.0; S(8): 100.0; T(14): 0.0; S(15): 0.0	211	Forward	Class I
O95810	1	Serum deprivation-response protein OS=Homo sapiens GN=SDPR PE=1 SV=3 - [SDPR_HUMAN]	O95810	S27	Serum deprivation-response protein (Cavin-2) (PS-p68) (Phosphatidylserine-binding protein)	SDPR	QEKPSSPSPMPSSTP			QEKPSSPpSPMPSSTPSPSLNLGNTEEAIR	1	S(5): 0.8; S(6): 0.8; S(8): 98.5; S(12): 0.0; S(13): 0.0; T(14): 0.0; S(16): 0.0; S(18): 0.0; T(24): 0.0	356	Forward	Class I
O95810	1	Serum deprivation-response protein OS=Homo sapiens GN=SDPR PE=1 SV=3 - [SDPR_HUMAN]	O95810	S247	Serum deprivation-response protein (Cavin-2) (PS-p68) (Phosphatidylserine-binding protein)	SDPR	DSLKKAFSRQNIEKK			AFpSRQNIEK	1	S(3): 100.0	271	Forward	Class I
O95810	1	Serum deprivation-response protein OS=Homo sapiens GN=SDPR PE=1 SV=3 - [SDPR_HUMAN]	O95810	S284	Serum deprivation-response protein (Cavin-2) (PS-p68) (Phosphatidylserine-binding protein)	SDPR	SNHQKISSGKSSPFK			ISpSGKSpSPFKVpSPLTFGR	3	S(2): 0.1; S(3): 99.9; S(6): 0.1; S(7): 99.9; S(12): 100.0; T(15): 0.0	138	Forward	Class I
O95810	1	Serum deprivation-response protein OS=Homo sapiens GN=SDPR PE=1 SV=3 - [SDPR_HUMAN]	O95810	S287	Serum deprivation-response protein (Cavin-2) (PS-p68) (Phosphatidylserine-binding protein)	SDPR	QKISSGKSSPFKVSP			pSSPFKVpSPLTFGR	2	S(1): 97.1; S(2): 2.9; S(7): 100.0; T(10): 0.0	282	Forward	Class I
O95810	1	Serum deprivation-response protein OS=Homo sapiens GN=SDPR PE=1 SV=3 - [SDPR_HUMAN]	O95810	S288	Serum deprivation-response protein (Cavin-2) (PS-p68) (Phosphatidylserine-binding protein)	SDPR	KISSGKSSPFKVSPL			ISSGKSpSPFKVpSPLTFGR	2	S(2): 0.0; S(3): 0.0; S(6): 0.0; S(7): 100.0; S(12): 100.0; T(15): 0.0	396	Forward	Class I
O95810	1	Serum deprivation-response protein OS=Homo sapiens GN=SDPR PE=1 SV=3 - [SDPR_HUMAN]	O95810	S293	Serum deprivation-response protein (Cavin-2) (PS-p68) (Phosphatidylserine-binding protein)	SDPR	KSSPFKVSPLTFGRK			ISSGKSpSPFKVpSPLTFGR	2	S(2): 0.0; S(3): 0.0; S(6): 0.0; S(7): 100.0; S(12): 100.0; T(15): 0.0	396	Forward	Class I
O95810	1	Serum deprivation-response protein OS=Homo sapiens GN=SDPR PE=1 SV=3 - [SDPR_HUMAN]	O95810	T296	Serum deprivation-response protein (Cavin-2) (PS-p68) (Phosphatidylserine-binding protein)	SDPR	PFKVSPLTFGRKKVR			SSPFKVSPLpTFGRK	1	S(1): 0.0; S(2): 0.0; S(7): 1.1; T(10): 98.9	93	Forward	Class I
O95810	1	Serum deprivation-response protein OS=Homo sapiens GN=SDPR PE=1 SV=3 - [SDPR_HUMAN]	O95810	S370	Serum deprivation-response protein (Cavin-2) (PS-p68) (Phosphatidylserine-binding protein)	SDPR	GSNSGMDSNIDLTIV			GSNSGMDpSNIDLTIVEDEEEESVALEQAQK	1	S(2): 0.0; S(4): 0.0; S(8): 100.0; T(13): 0.0; S(22): 0.0	407	Forward	Class I
O95816	1	BAG family molecular chaperone regulator 2 OS=Homo sapiens GN=BAG2 PE=1 SV=1 - [BAG2_HUMAN]	O95816	S20	BAG family molecular chaperone regulator 2 (BAG-2) (Bcl-2-associated athanogene 2)	BAG2	GRFCRSSSMADRSSR	CAMK/MAPKAPK	MAPKAPK2	FCRSSpSMADRSSR	1	S(4): 0.0; S(5): 0.1; S(6): 99.9; S(11): 0.0; S(12): 0.0	101	Forward	Class I
O95816	1	BAG family molecular chaperone regulator 2 OS=Homo sapiens GN=BAG2 PE=1 SV=1 - [BAG2_HUMAN]	O95816	S73	BAG family molecular chaperone regulator 2 (BAG-2) (Bcl-2-associated athanogene 2)	BAG2	SQDMRQISDGEREEL	CAMK/MAPKAPK	MAPKAPK2	QIpSDGEREELNLTANR	1	S(3): 100.0; T(13): 0.0	391	Forward	Class I
O95817	1	BAG family molecular chaperone regulator 3 OS=Homo sapiens GN=BAG3 PE=1 SV=3 - [BAG3_HUMAN]	O95817	S136	BAG family molecular chaperone regulator 3 (BAG-3) (Bcl-2-associated athanogene 3) (Bcl-2-binding protein Bis) (Docking protein CAIR-1)	BAG3 BIS	AAPQRSQSPLRGMPE	Atypical/PIKK/FRAP	FRAP	SQpSPLRGMPETTQPDK	1	S(1): 0.0; S(3): 100.0; T(11): 0.0; T(12): 0.0	196	Forward	Class I
O95817	1	BAG family molecular chaperone regulator 3 OS=Homo sapiens GN=BAG3 PE=1 SV=3 - [BAG3_HUMAN]	O95817	S173	BAG family molecular chaperone regulator 3 (BAG-3) (Bcl-2-associated athanogene 3) (Bcl-2-binding protein Bis) (Docking protein CAIR-1)	BAG3 BIS	HGPERSQSPAASDCS	Atypical/PIKK/FRAP	FRAP	SQpSPAASDCSSSSSSASLPSSGR	1	S(1): 0.4; S(3): 99.6; S(7): 0.0; S(10): 0.0; S(11): 0.0; S(12): 0.0; S(13): 0.0; S(14): 0.0; S(15): 0.0; S(17): 0.0; S(20): 0.0; S(21): 0.0	422	Forward	Class I
O95817	1	BAG family molecular chaperone regulator 3 OS=Homo sapiens GN=BAG3 PE=1 SV=3 - [BAG3_HUMAN]	O95817	S274	BAG family molecular chaperone regulator 3 (BAG-3) (Bcl-2-associated athanogene 3) (Bcl-2-binding protein Bis) (Docking protein CAIR-1)	BAG3 BIS	RSSVQGASSREGSPA			SSVQGApSpSREGSPAR	2	S(1): 0.0; S(2): 0.0; S(7): 100.0; S(8): 100.0; S(12): 0.0	109	Forward	Class I
O95817	1	BAG family molecular chaperone regulator 3 OS=Homo sapiens GN=BAG3 PE=1 SV=3 - [BAG3_HUMAN]	O95817	S275	BAG family molecular chaperone regulator 3 (BAG-3) (Bcl-2-associated athanogene 3) (Bcl-2-binding protein Bis) (Docking protein CAIR-1)	BAG3 BIS	SSVQGASSREGSPAR	CAMK/RAD53	CHK2	SSVQGASpSREGpSPAR	2	S(1): 0.0; S(2): 0.0; S(7): 0.0; S(8): 100.0; S(12): 100.0	313	Forward	Class I
O95817	1	BAG family molecular chaperone regulator 3 OS=Homo sapiens GN=BAG3 PE=1 SV=3 - [BAG3_HUMAN]	O95817	S279	BAG family molecular chaperone regulator 3 (BAG-3) (Bcl-2-associated athanogene 3) (Bcl-2-binding protein Bis) (Docking protein CAIR-1)	BAG3 BIS	GASSREGSPARSSTP	Atypical/PIKK/FRAP	FRAP	SSVQGASpSREGpSPAR	2	S(1): 0.0; S(2): 0.0; S(7): 0.0; S(8): 100.0; S(12): 100.0	313	Forward	Class I
O95817	1	BAG family molecular chaperone regulator 3 OS=Homo sapiens GN=BAG3 PE=1 SV=3 - [BAG3_HUMAN]	O95817	T285	BAG family molecular chaperone regulator 3 (BAG-3) (Bcl-2-associated athanogene 3) (Bcl-2-binding protein Bis) (Docking protein CAIR-1)	BAG3 BIS	GSPARSSTPLHSPSP	Atypical/PIKK/FRAP	FRAP	SSpTPLHpSPSPIR	2	S(1): 0.0; S(2): 0.4; T(3): 99.6; S(7): 100.0; S(9): 0.0	191	Forward	Class I
O95817	1	BAG family molecular chaperone regulator 3 OS=Homo sapiens GN=BAG3 PE=1 SV=3 - [BAG3_HUMAN]	O95817	S289	BAG family molecular chaperone regulator 3 (BAG-3) (Bcl-2-associated athanogene 3) (Bcl-2-binding protein Bis) (Docking protein CAIR-1)	BAG3 BIS	RSSTPLHSPSPIRVH	Atypical/PIKK/FRAP	FRAP	SSTPLHpSPSPIR	1	S(1): 0.0; S(2): 0.0; T(3): 0.0; S(7): 100.0; S(9): 0.0	219	Forward	Class I
O95817	1	BAG family molecular chaperone regulator 3 OS=Homo sapiens GN=BAG3 PE=1 SV=3 - [BAG3_HUMAN]	O95817	S377	BAG family molecular chaperone regulator 3 (BAG-3) (Bcl-2-associated athanogene 3) (Bcl-2-binding protein Bis) (Docking protein CAIR-1)	BAG3 BIS	PVPCPPPSPGPSAVP	Atypical/PIKK/FRAP	FRAP	VPPAPVPCPPPpSPGPSAVPSSPK	1	S(12): 100.0; S(16): 0.0; S(20): 0.0; S(21): 0.0	177	Forward	Class I
O95817	1	BAG family molecular chaperone regulator 3 OS=Homo sapiens GN=BAG3 PE=1 SV=3 - [BAG3_HUMAN]	O95817	S381	BAG family molecular chaperone regulator 3 (BAG-3) (Bcl-2-associated athanogene 3) (Bcl-2-binding protein Bis) (Docking protein CAIR-1)	BAG3 BIS	PPPSPGPSAVPSSPK	Atypical/PIKK/FRAP	FRAP	VPPAPVPCPPPSPGPpSAVPSSPK	1	S(12): 0.0; S(16): 100.0; S(20): 0.0; S(21): 0.0	99	Forward	Class I
O95819	1	Mitogen-activated protein kinase kinase kinase kinase 4 OS=Homo sapiens GN=MAP4K4 PE=1 SV=2 - [M4K4_HUMAN]	O95819	S629	Mitogen-activated protein kinase kinase kinase kinase 4 (EC 2.7.11.1) (HPK/GCK-like kinase HGK) (MAPK/ERK kinase kinase kinase 4) (MEK kinase kinase 4) (MEKKK 4) (Nck-interacting kinase)	MAP4K4 HGK KIAA0687 NIK	QVPVRTTSRSPVLSR			TTpSRpSPVLSRR	2	T(1): 0.0; T(2): 0.0; S(3): 100.0; S(5): 100.0; S(9): 0.0	276	Forward	Class I
O95819	1	Mitogen-activated protein kinase kinase kinase kinase 4 OS=Homo sapiens GN=MAP4K4 PE=1 SV=2 - [M4K4_HUMAN]	O95819	S631	Mitogen-activated protein kinase kinase kinase kinase 4 (EC 2.7.11.1) (HPK/GCK-like kinase HGK) (MAPK/ERK kinase kinase kinase 4) (MEK kinase kinase 4) (MEKKK 4) (Nck-interacting kinase)	MAP4K4 HGK KIAA0687 NIK	PVRTTSRSPVLSRRD	STE/STE11	MAP3K1	TTpSRpSPVLSRR	2	T(1): 0.0; T(2): 0.0; S(3): 100.0; S(5): 100.0; S(9): 0.0	276	Forward	Class I
O95819	1	Mitogen-activated protein kinase kinase kinase kinase 4 OS=Homo sapiens GN=MAP4K4 PE=1 SV=2 - [M4K4_HUMAN]	O95819	S639	Mitogen-activated protein kinase kinase kinase kinase 4 (EC 2.7.11.1) (HPK/GCK-like kinase HGK) (MAPK/ERK kinase kinase kinase 4) (MEK kinase kinase 4) (MEKKK 4) (Nck-interacting kinase)	MAP4K4 HGK KIAA0687 NIK	PVLSRRDSPLQGSGQ			RDpSPLQGSGQQNSQAGQR	1	S(3): 100.0; S(8): 0.0; S(13): 0.0	377	Forward	Class I
O95819	1	Mitogen-activated protein kinase kinase kinase kinase 4 OS=Homo sapiens GN=MAP4K4 PE=1 SV=2 - [M4K4_HUMAN]	O95819	S710	Mitogen-activated protein kinase kinase kinase kinase 4 (EC 2.7.11.1) (HPK/GCK-like kinase HGK) (MAPK/ERK kinase kinase kinase 4) (MEK kinase kinase 4) (MEKKK 4) (Nck-interacting kinase)	MAP4K4 HGK KIAA0687 NIK	RFRVRSSSKSEGSPS			SSpSKSEGSPSQRLENAVK	1	S(1): 1.0; S(2): 9.4; S(3): 89.4; S(5): 0.1; S(8): 0.0; S(10): 0.0	167	Forward	Class I
O95819	1	Mitogen-activated protein kinase kinase kinase kinase 4 OS=Homo sapiens GN=MAP4K4 PE=1 SV=2 - [M4K4_HUMAN]	O95819	S715	Mitogen-activated protein kinase kinase kinase kinase 4 (EC 2.7.11.1) (HPK/GCK-like kinase HGK) (MAPK/ERK kinase kinase kinase 4) (MEK kinase kinase 4) (MEKKK 4) (Nck-interacting kinase)	MAP4K4 HGK KIAA0687 NIK	SSSKSEGSPSQRLEN			SEGpSPSQRLENAVK	1	S(1): 0.0; S(4): 100.0; S(6): 0.0	260	Forward	Class I
O95819	1	Mitogen-activated protein kinase kinase kinase kinase 4 OS=Homo sapiens GN=MAP4K4 PE=1 SV=2 - [M4K4_HUMAN]	O95819	S800	Mitogen-activated protein kinase kinase kinase kinase 4 (EC 2.7.11.1) (HPK/GCK-like kinase HGK) (MAPK/ERK kinase kinase kinase 4) (MEK kinase kinase 4) (MEKKK 4) (Nck-interacting kinase)	MAP4K4 HGK KIAA0687 NIK	PEDTRAASSLNLSNG			AApSSLNLSNGETESVK	1	S(3): 100.0; S(4): 0.0; S(8): 0.0; T(12): 0.0; S(14): 0.0	245	Forward	Class I
O95819	1	Mitogen-activated protein kinase kinase kinase kinase 4 OS=Homo sapiens GN=MAP4K4 PE=1 SV=2 - [M4K4_HUMAN]	O95819	S805	Mitogen-activated protein kinase kinase kinase kinase 4 (EC 2.7.11.1) (HPK/GCK-like kinase HGK) (MAPK/ERK kinase kinase kinase 4) (MEK kinase kinase 4) (MEKKK 4) (Nck-interacting kinase)	MAP4K4 HGK KIAA0687 NIK	AASSLNLSNGETESV	TKL/MLK	TAK1	AASSLNLpSNGETESVK	1	S(3): 0.0; S(4): 0.0; S(8): 100.0; T(12): 0.0; S(14): 0.0	197	Forward	Class I
[truncated: 8,412 more rows]
[truncated: 16 more columns]

## Sheet: Class II Phosphosites Fwd
Protein Group Accessions	# of Protein Groups	Protein Descriptions	Acc. # 1	Sites Acc. # 1	Protein Names Acc. # 1	Gene Names Acc. # 1	Phosposite Sequence Context	Peptide Sequence	# of Phospho-sites	Changed Site 1	Changed Site 2	HighProb Site 1	Prob 1	HighProb Site 2	Prob 2	HighProb Site 3	Prob 3	HighProb Site 4	Prob 4	HighProb Site 5	Prob 5	pRS Site Probabilities	pRS Score	Experiment Identifed	Class Type	Sequence (MASCOT)	Search Engine Rank (MASCOT)	Modifications (MASCOT)	IonScore (MASCOT)	Activation Type	Fraction # Identified	# of Missed Cleavages	MH+ [Da]	Charge	m/z [Da]	ΔM [ppm]	RT [min]	Scan #	Spectrum File
[truncated: 3,316 more rows]
