# Supplementary material for: Quantitative global phosphoproteomics of human umbilical vein endothelial cells after activation of the Rap signaling pathway
Source: Royal Society of Chemistry journal article supplement (doi:10.1039/c3mb25524g), 2013-01-21
Supplement: c3mb25524g_5.xlsx [file c3mb25524g_5.xlsx]

## Sheet: Class I Phosphopeptides Rev
Peptide Sequence	# of Phospho-sites	pRS Site Probabilities	pRS Score	Protein Group Accessions	Protein Descriptions	# of Protein Groups	Acc. # 1	Sites Acc. # 1	Protein Names Acc. # 1	Gene Names Acc. # 1	Acc. # 2	Sites Acc. # 2	Protein Names Acc. # 2	Gene Names Acc. # 2	Acc. # 3	Sites Acc. # 3	Protein Names Acc. # 3	Gene Names Acc. # 3	Acc. # 4	Sites Acc. # 4	Protein Names Acc. # 4	Gene Names Acc. # 4	Acc. # 5	Sites Acc. # 5	Protein Names Acc. # 5	Gene Names Acc. # 5	Acc. # 6	Sites Acc. # 6	Protein Names Acc. # 6	Gene Names Acc. # 6	Acc. # 7	Sites Acc. # 7	Protein Names Acc. # 7	Gene Names Acc. # 7	Experiment Identified	Class Type	Sequence (MASCOT)	Search Engine Rank (MASCOT)	Modifications (MASCOT)	IonScore (MASCOT)	Activation Type	Fraction # Identified	# of Missed Cleavages	MH+ [Da]	Charge	m/z [Da]	ΔM [ppm]	RT [min]	Scan #
RAGGGGGLGAGpSPALSGGQGR	1	S(12): 100.0; S(16): 0.0	565	Q6IQ22	Putative Ras-related protein Rab-12 OS=Homo sapiens GN=RAB12 PE=5 SV=3 - [RAB12_HUMAN]	1	Q6IQ22	S21	Ras-related protein Rab-12	RAB12																									Reverse	Class I	rAGGGGGLGAGsPALSGGQGR	1	N-Term(Dimethyl:2H(4)); S12(Phospho)	144	ETD	30	1	1851.9	3	617.971	-8.13	53.56	3428
VDEGAGDSAAVASGGAQTLALAGpSPAPSGHPK	1	S(8): 0.0; S(13): 0.0; T(18): 0.0; S(24): 100.0; S(28): 0.0	555	Q9NZT2	Opioid growth factor receptor OS=Homo sapiens GN=OGFR PE=1 SV=3 - [OGFR_HUMAN]	1	Q9NZT2	S484	Opioid growth factor receptor (OGFr) (Protein 7-60) (Zeta-type opioid receptor)	OGFR																									Reverse	Class I	vDEGAGDSAAVASGGAQTLALAGsPAPSGHPk	1	N-Term(Dimethyl:2H(4)); S24(Phospho); K32(Dimethyl:2H(4))	96	HCD	27	0	2990.48	3	997.497	1.95	102.84	6990
RSYpSSPDITQAIQEEEK	1	S(2): 0.0; Y(3): 0.0; S(4): 100.0; S(5): 0.0; T(9): 0.0	542	P40818	Ubiquitin carboxyl-terminal hydrolase 8 OS=Homo sapiens GN=USP8 PE=1 SV=1 - [UBP8_HUMAN]	1	P40818	S718	Ubiquitin carboxyl-terminal hydrolase 8 (EC 3.4.19.12) (Deubiquitinating enzyme 8) (Ubiquitin isopeptidase Y) (hUBPy) (Ubiquitin thioesterase 8) (Ubiquitin-specific-processing protease 8)	USP8 KIAA0055 UBPY																									Reverse	Class I	rSYsSPDITQAIQEEEk	1	N-Term(Dimethyl); S4(Phospho); K17(Dimethyl)	97	ETD	28	1	2116.98	3	706.331	-0.78	115.43	7582
QLHLEGASLELpSDDDTESK	1	S(8): 0.0; S(12): 100.0; T(16): 0.0; S(18): 0.0	532	P35580	Myosin-10 OS=Homo sapiens GN=MYH10 PE=1 SV=2 - [MYH10_HUMAN]	1	P35580	S1956	Myosin-10 (Cellular myosin heavy chain, type B) (Myosin heavy chain 10) (Myosin heavy chain, non-muscle IIb) (Non-muscle myosin heavy chain B) (NMMHC-B) (Non-muscle myosin heavy chain IIb) (NMMHC II-b) (NMMHC-IIB)	MYH10																									Reverse	Class I	qLHLEGASLELsDDDTESk	1	N-Term(Dimethyl:2H(4)); S12(Phospho); K19(Dimethyl:2H(4))	119	ETD	28	0	2231.06	3	744.358	0.93	124.04	8021
RSVAVpSDEEEVEEEAER	1	S(2): 0.0; S(6): 100.0	523	Q9Y6X9	MORC family CW-type zinc finger protein 2 OS=Homo sapiens GN=MORC2 PE=1 SV=2 - [MORC2_HUMAN]	1	Q9Y6X9	S743	MORC family CW-type zinc finger protein 2 (Zinc finger CW-type coiled-coil domain protein 1)	MORC2 KIAA0852 ZCWCC1																									Reverse	Class I	rSVAVsDEEEVEEEAER	1	N-Term(Dimethyl); S6(Phospho)	116	ETD	29	1	2070.89	3	690.967	0.34	93.26	6340
KETEpSEAEDNLDDLEK	1	T(3): 0.0; S(5): 100.0	516	Q8IYB3	Serine/arginine repetitive matrix protein 1 OS=Homo sapiens GN=SRRM1 PE=1 SV=2 - [SRRM1_HUMAN]	1	Q8IYB3	S874	Serine/arginine repetitive matrix protein 1 (SR-related nuclear matrix protein of 160 kDa) (SRm160) (Ser/Arg-related nuclear matrix protein)	SRRM1 SRM160																									Reverse	Class I	kETEsEAEDNLDDLEk	1	N-Term(Dimethyl:2H(4)); K1(Dimethyl:2H(4)); S5(Phospho); K16(Dimethyl:2H(4))	108	ETD	28	1	2040.96	3	680.992	-1.6	100.37	6756
AAEAGGAEEQYGFLTpTPTK	1	Y(11): 0.0; T(15): 0.0; T(16): 100.0; T(18): 0.0	512	P46821	Microtubule-associated protein 1B OS=Homo sapiens GN=MAP1B PE=1 SV=1 - [MAP1B_HUMAN]	1	P46821	T1067	Microtubule-associated protein 1B (MAP-1B) [Cleaved into: MAP1 light chain LC1]	MAP1B																									Reverse	Class I	aAEAGGAEEQYGFLTtPTk	1	N-Term(Dimethyl:2H(4)); T16(Phospho); K19(Dimethyl:2H(4))	117	ETD	14	0	2085.01	3	695.673	1.34	123.16	9303
ASLGpSLEGEAEAEASpSPK	2	S(2): 0.0; S(5): 100.0; S(15): 0.0; S(16): 100.0	510	Q09666	Neuroblast differentiation-associated protein AHNAK OS=Homo sapiens GN=AHNAK PE=1 SV=2 - [AHNK_HUMAN]	1	Q09666	S5752, S5763	Neuroblast differentiation-associated protein AHNAK (Desmoyokin)	AHNAK PM227																									Reverse	Class I	aSLGsLEGEAEAEASsPk	1	N-Term(Dimethyl:2H(4)); S5(Phospho); S16(Phospho); K18(Dimethyl:2H(4))	108	ETD	7	0	1956.87	3	652.961	-0.07	86.77	6031
LLHEDLDEpSDDDMDEK	1	S(9): 100.0	508	O43150	Development and differentiation-enhancing factor 2 OS=Homo sapiens GN=DDEF2 PE=1 SV=3 - [DDEF2_HUMAN]	1	O43150	S701	Arf-GAP with SH3 domain, ANK repeat and PH domain-containing protein 2 (Development and differentiation-enhancing factor 2) (Paxillin-associated protein with ARF GAP activity 3) (PAG3) (Pyk2 C-terminus-associated protein) (PAP)	ASAP2 DDEF2 KIAA0400																									Reverse	Class I	lLHEDLDEsDDDmDEk	1	N-Term(Dimethyl); S9(Phospho); M13(Oxidation); K16(Dimethyl)	82	ETD	28	0	2070.8	3	690.94	-2.63	71.34	4970
DQSTpSMSHINLLFSR	1	S(3): 0.0; T(4): 0.0; S(5): 100.0; S(7): 0.0; S(14): 0.0	500	Q5VUB5	Protein FAM171A1 OS=Homo sapiens GN=FAM171A1 PE=1 SV=1 - [F1711_HUMAN]	1	Q5VUB5	S358	Protein FAM171A1 (Astroprincin)	FAM171A1 C10orf38																									Reverse	Class I	dQSTsMSHINLLFSR	1	N-Term(Dimethyl); S5(Phospho)	103	ETD	27	0	1843.83	3	615.283	-3.76	140.32	9129
ASLGSLEGEAEAEASpSPKGK	1	S(2): 0.0; S(5): 0.0; S(15): 0.3; S(16): 99.7	499	Q09666	Neuroblast differentiation-associated protein AHNAK OS=Homo sapiens GN=AHNAK PE=1 SV=2 - [AHNK_HUMAN]	1	Q09666	S5763	Neuroblast differentiation-associated protein AHNAK (Desmoyokin)	AHNAK PM227																									Reverse	Class I	aSLGSLEGEAEAEASsPkGk	1	N-Term(Dimethyl:2H(4)); S16(Phospho); K18(Dimethyl:2H(4)); K20(Dimethyl:2H(4))	102	HCD	27	1	2094.08	2	1047.54	0.39	131.2	10886
LSLEGDHSpTPPSAYGSVK	1	S(2): 0.0; S(8): 0.0; T(9): 100.0; S(12): 0.0; Y(14): 0.0; S(16): 0.0	496	P07355;A6NMY6	Annexin A2 OS=Homo sapiens GN=ANXA2 PE=1 SV=2 - [ANXA2_HUMAN]|Putative annexin A2-like protein OS=Homo sapiens GN=ANXA2P2 PE=5 SV=2 - [AXA2L_HUMAN]	2	P07355	T19	Annexin A2 (Annexin II) (Annexin-2) (Calpactin I heavy chain) (Calpactin-1 heavy chain) (Chromobindin-8) (Lipocortin II) (Placental anticoagulant protein IV) (PAP-IV) (Protein I) (p36)	ANXA2 ANX2 ANX2L4 CAL1H LPC2D	A6NMY6	T19	Putative annexin A2-like protein (Annexin A2 pseudogene 2) (Lipocortin II pseudogene)	ANXA2P2 ANX2L2 ANX2P2 LPC2B																					Reverse	Class I	lSLEGDHStPPSAYGSVk	1	N-Term(Dimethyl:2H(4)); T9(Phospho); K18(Dimethyl:2H(4))	107	ETD	27	0	1988.98	3	663.665	0.08	96.99	6347
KSSpSLVDIREEETEGGSR	1	S(2): 0.0; S(3): 0.0; S(4): 100.0; T(13): 0.0; S(17): 0.0	493	Q96Q42	Alsin OS=Homo sapiens GN=ALS2 PE=1 SV=1 - [ALS2_HUMAN]	1	Q96Q42	S466	Alsin (Amyotrophic lateral sclerosis 2 chromosomal region candidate gene 6 protein) (Amyotrophic lateral sclerosis 2 protein)	ALS2 ALS2CR6 KIAA1563																									Reverse	Class I	kSSsLVDIREEETEGGSR	1	N-Term(Dimethyl:2H(4)); K1(Dimethyl:2H(4)); S4(Phospho)	91	ETD	32	2	2123.05	3	708.354	0.55	70.95	4487
SQRYpSGAYGASVSDEELK	1	S(1): 0.0; Y(4): 0.0; S(5): 100.0; Y(8): 0.0; S(11): 0.0; S(13): 0.0	493	Q9NX63	Coiled-coil-helix-coiled-coil-helix domain-containing protein 3, mitochondrial OS=Homo sapiens GN=CHCHD3 PE=1 SV=1 - [CHCH3_HUMAN]	1	Q9NX63	S50	Coiled-coil-helix-coiled-coil-helix domain-containing protein 3, mitochondrial	CHCHD3 MINOS3																									Reverse	Class I	sQRYsGAYGASVSDEELk	1	N-Term(Dimethyl:2H(4)); S5(Phospho); K18(Dimethyl:2H(4))	98	ETD	28	1	2090.99	3	697.667	-0.78	85.41	5901
ASLGSLEGEAEAEApSSPKGK	1	S(2): 0.0; S(5): 0.0; S(15): 99.7; S(16): 0.3	493	Q09666	Neuroblast differentiation-associated protein AHNAK OS=Homo sapiens GN=AHNAK PE=1 SV=2 - [AHNK_HUMAN]	1	Q09666	S5762	Neuroblast differentiation-associated protein AHNAK (Desmoyokin)	AHNAK PM227																									Reverse	Class I	aSLGSLEGEAEAEASsPkGk	1	N-Term(Dimethyl:2H(4)); S16(Phospho); K18(Dimethyl:2H(4)); K20(Dimethyl:2H(4))	93	HCD	27	1	2094.08	2	1047.54	0.97	113.64	7716
LKpSEDGVEGDLGETQSR	1	S(3): 100.0; T(14): 0.0; S(16): 0.0	489	Q09666	Neuroblast differentiation-associated protein AHNAK OS=Homo sapiens GN=AHNAK PE=1 SV=2 - [AHNK_HUMAN]	1	Q09666	S135	Neuroblast differentiation-associated protein AHNAK (Desmoyokin)	AHNAK PM227																									Reverse	Class I	lksEDGVEGDLGETQSR	1	N-Term(Dimethyl:2H(4)); K2(Dimethyl:2H(4)); S3(Phospho)	109	ETD	28	1	1963.94	3	655.318	-3.38	74.39	5167
SNpSSSEAVLGQEELSAQAK	1	S(1): 0.0; S(3): 100.0; S(4): 0.0; S(5): 0.0; S(15): 0.0	489	Q9BXF6	Rab11 family-interacting protein 5 OS=Homo sapiens GN=RAB11FIP5 PE=1 SV=1 - [RFIP5_HUMAN]	1	Q9BXF6	S395	Rab11 family-interacting protein 5 (Rab11-FIP5) (Gamma-SNAP-associated factor 1) (Gaf-1) (Phosphoprotein pp75) (Rab11-interacting protein Rip11)	RAB11FIP5 GAF1 KIAA0857 RIP11																									Reverse	Class I	sNsSSEAVLGQEELSAQAk	1	N-Term(Dimethyl:2H(4)); S3(Phospho); K19(Dimethyl:2H(4))	115	HCD	13	0	2079.01	2	1040.01	0.91	111.67	8915
HIISATSLSTpSPTELGSR	1	S(4): 0.0; T(6): 0.0; S(7): 0.0; S(9): 0.0; T(10): 0.0; S(11): 100.0; T(13): 0.0; S(17): 0.0	488	Q5JSZ5	Uncharacterized protein KIAA0515 OS=Homo sapiens GN=KIAA0515 PE=1 SV=1 - [K0515_HUMAN]	1	Q5JSZ5	S226	Protein PRRC2B (HLA-B-associated transcript 2-like 1) (Proline-rich coiled-coil protein 2B)	PRRC2B BAT2L BAT2L1 KIAA0515																									Reverse	Class I	hIISATSLSTsPTELGSR	1	N-Term(Dimethyl); S11(Phospho)	93	ETD	29	0	1964.97	3	655.662	1.26	99.59	5895
AMADELpSEKQVYDAHTK	1	S(7): 100.0; Y(12): 0.0; T(16): 0.0	485	Q03135	Caveolin-1 OS=Homo sapiens GN=CAV1 PE=1 SV=4 - [CAV1_HUMAN]	1	Q03135	S37	Caveolin-1	CAV1 CAV																									Reverse	Class I	amADELsEkQVYDAHTk	1	N-Term(Dimethyl); M2(Oxidation); S7(Phospho); K9(Dimethyl); K17(Dimethyl)	86	ETD	31	1	2115.96	3	705.992	-2.14	67.85	4205
EIQNGNLHEpSDSESVPR	1	S(10): 100.0; S(12): 0.0; S(14): 0.0	485	Q86UP2	Kinectin OS=Homo sapiens GN=KTN1 PE=1 SV=1 - [KTN1_HUMAN]	1	Q86UP2	S75	Kinectin (CG-1 antigen) (Kinesin receptor)	KTN1 CG1 KIAA0004																									Reverse	Class I	eIQNGNLHEsDSESVPR	1	N-Term(Dimethyl); S10(Phospho)	117	ETD	28	0	2018.88	3	673.63	-2.67	63.75	4474
KLGAGEGGEASVpSPEK	1	S(11): 0.0; S(13): 100.0	484	Q13428	Treacle protein OS=Homo sapiens GN=TCOF1 PE=1 SV=2 - [TCOF_HUMAN]	1	Q13428	S1378	Treacle protein (Treacher Collins syndrome protein)	TCOF1																									Reverse	Class I	kLGAGEGGEASVsPEk	1	N-Term(Dimethyl); K1(Dimethyl); S13(Phospho); K16(Dimethyl)	86	ETD	28	1	1679.82	3	560.612	-2.05	47.73	3409
QSFDDNDpSEELEDKDSK	1	S(2): 0.0; S(8): 100.0; S(16): 0.0	483	O60841	Eukaryotic translation initiation factor 5B OS=Homo sapiens GN=EIF5B PE=1 SV=3 - [IF2P_HUMAN]	1	O60841	S113	Eukaryotic translation initiation factor 5B (eIF-5B) (Translation initiation factor IF-2)	EIF5B IF2 KIAA0741																									Reverse	Class I	qSFDDNDsEELEDkDSk	1	N-Term(Dimethyl:2H(4)); S8(Phospho); K14(Dimethyl:2H(4)); K17(Dimethyl:2H(4))	96	ETD	27	1	2176.95	3	726.323	-0.79	67.93	4651
LVSFHDDpSDEDLLHI	1	S(3): 0.0; S(8): 100.0	482	P11717	Cation-independent mannose-6-phosphate receptor OS=Homo sapiens GN=IGF2R PE=1 SV=2 - [MPRI_HUMAN]	1	P11717	S2484	Cation-independent mannose-6-phosphate receptor (CI Man-6-P receptor) (CI-MPR) (M6PR) (300 kDa mannose 6-phosphate receptor) (MPR 300) (Insulin-like growth factor 2 receptor) (Insulin-like growth factor II receptor) (IGF-II receptor) (M6P/IGF2 receptor) (M6P/IGF2R) (CD antigen CD222)	IGF2R MPRI																									Reverse	Class I	lVSFHDDsDEDLLHI	1	N-Term(Dimethyl:2H(4)); S8(Phospho)	76	ETD	27	0	1866.85	3	622.954	1.44	142.67	9785
RNpSSEASSGDFLDLK	1	S(3): 100.0; S(4): 0.0; S(7): 0.0; S(8): 0.0	478	Q9UK76	Hematological and neurological expressed 1 protein OS=Homo sapiens GN=HN1 PE=1 SV=3 - [HN1_HUMAN]	1	Q9UK76	S87	Hematological and neurological expressed 1 protein (Androgen-regulated protein 2)	HN1 ARM2																									Reverse	Class I	rNsSEASSGDFLDLk	1	N-Term(Dimethyl); S3(Phospho); K15(Dimethyl)	106	ETD	28	1	1761.79	3	587.935	-8.27	118.83	7759
ENNVSQPASSSSSSSSSNNGSApSPTK	1	S(5): 0.0; S(9): 0.0; S(10): 0.0; S(11): 0.0; S(12): 0.0; S(13): 0.0; S(14): 0.0; S(15): 0.0; S(16): 0.0; S(17): 0.0; S(21): 0.0; S(23): 100.0; T(25): 0.0	477	Q02446	Transcription factor Sp4 OS=Homo sapiens GN=SP4 PE=1 SV=1 - [SP4_HUMAN]	1	Q02446	S136	Transcription factor Sp4 (SPR-1)	SP4																									Reverse	Class I	eNNVSQPASSSSSSSSSNNGSAsPTk	1	N-Term(Dimethyl); S23(Phospho); K26(Dimethyl)	116	HCD	14	0	2634.11	3	878.709	-1.29	31.16	2328
MLGEDpSDEEEEMDTSER	1	S(6): 100.0; T(14): 0.0; S(15): 0.0	475	Q9BWU0	Kanadaptin OS=Homo sapiens GN=SLC4A1AP PE=1 SV=1 - [NADAP_HUMAN]	1	Q9BWU0	S312	Kanadaptin (Human lung cancer oncogene 3 protein) (HLC-3) (Kidney anion exchanger adapter protein) (Solute carrier family 4 anion exchanger member 1 adapter protein)	SLC4A1AP HLC3																									Reverse	Class I	mLGEDsDEEEEMDTSER	1	N-Term(Dimethyl:2H(4)); S6(Phospho)	90	ETD	13	0	2113.78	3	705.264	0.62	92.24	6829
LESLYpSDEEDESAVGADK	1	S(3): 0.0; Y(5): 0.1; S(6): 99.9; S(12): 0.0	475	Q9UP95	Solute carrier family 12 member 4 OS=Homo sapiens GN=SLC12A4 PE=1 SV=2 - [S12A4_HUMAN]	1	Q9UP95	S967	Solute carrier family 12 member 4 (Electroneutral potassium-chloride cotransporter 1) (Erythroid K-Cl cotransporter 1) (hKCC1)	SLC12A4 KCC1																									Reverse	Class I	lESLYsDEEDESAVGADk	1	N-Term(Dimethyl:2H(4)); S6(Phospho); K18(Dimethyl:2H(4))	102	ETD	13	0	2100.94	3	700.983	0.1	116.48	8537
SLGKDGpSLEDDEDEEDDLDEGVGGK	1	S(1): 0.0; S(7): 100.0	472	Q12789	General transcription factor 3C polypeptide 1 OS=Homo sapiens GN=GTF3C1 PE=1 SV=3 - [TF3C1_HUMAN]	1	Q12789	S1611	General transcription factor 3C polypeptide 1 (TF3C-alpha) (TFIIIC box B-binding subunit) (Transcription factor IIIC 220 kDa subunit) (TFIIIC 220 kDa subunit) (TFIIIC220) (Transcription factor IIIC subunit alpha)	GTF3C1																									Reverse	Class I	sLGkDGsLEDDEDEEDDLDEGVGGk	1	N-Term(Dimethyl); K4(Dimethyl); S7(Phospho); K25(Dimethyl)	112	HCD	26	1	2787.16	3	929.726	0.9	104.01	7227
SLpSTSGESLYHVLGLDK	1	S(1): 0.0; S(3): 100.0; T(4): 0.0; S(5): 0.0; S(8): 0.0; Y(10): 0.0	471	Q9H3Z4	DnaJ homolog subfamily C member 5 OS=Homo sapiens GN=DNAJC5 PE=1 SV=1 - [DNJC5_HUMAN]	1	Q9H3Z4	S10	DnaJ homolog subfamily C member 5 (Cysteine string protein) (CSP)	DNAJC5 CSP																									Reverse	Class I	sLsTSGESLYHVLGLDk	1	N-Term(Dimethyl); S3(Phospho); K17(Dimethyl)	96	ETD	28	0	1941.97	3	647.996	9.1	146.79	9328
ANpSGGVDLDSSGEFASIEK	1	S(3): 100.0; S(10): 0.0; S(11): 0.0; S(16): 0.0	469	Q92766	RAS-responsive element-binding protein 1 OS=Homo sapiens GN=RREB1 PE=1 SV=3 - [RREB1_HUMAN]	1	Q92766	S1167	Ras-responsive element-binding protein 1 (RREB-1) (Finger protein in nuclear bodies) (Raf-responsive zinc finger protein LZ321) (Zinc finger motif enhancer-binding protein 1) (Zep-1)	RREB1 FINB																									Reverse	Class I	aNsGGVDLDSSGEFASIEk	1	N-Term(Dimethyl); S3(Phospho); K19(Dimethyl)	129	HCD	13	0	2018.9	2	1009.95	1.29	133.17	9696
QKIDDRDpSDEEGASDR	1	S(8): 100.0; S(14): 0.0	468	Q8TDD1	ATP-dependent RNA helicase DDX54 OS=Homo sapiens GN=DDX54 PE=1 SV=2 - [DDX54_HUMAN]	1	Q8TDD1	S782	ATP-dependent RNA helicase DDX54 (EC 3.6.4.13) (ATP-dependent RNA helicase DP97) (DEAD box RNA helicase 97 kDa) (DEAD box protein 54)	DDX54																									Reverse	Class I	qkIDDRDsDEEGASDR	1	N-Term(Dimethyl); K2(Dimethyl); S8(Phospho)	83	ETD	32	2	1971.83	3	657.949	1.03	29.33	2150
GQKpSPGALETPSAAGSQGNTASQGK	1	S(4): 100.0; T(10): 0.0; S(12): 0.0; S(16): 0.0; T(20): 0.0; S(22): 0.0	468	Q9Y2D5	A-kinase anchor protein 2 OS=Homo sapiens GN=AKAP2 PE=1 SV=2 - [AKAP2_HUMAN]	1	Q9Y2D5	S393	A-kinase anchor protein 2 (AKAP-2) (AKAP-KL) (Protein kinase A-anchoring protein 2) (PRKA2)	AKAP2 KIAA0920 PRKA2																									Reverse	Class I	gQksPGALETPSAAGSQGNTASQGk	1	N-Term(Dimethyl); K3(Dimethyl); S4(Phospho); K25(Dimethyl)	108	HCD	27	1	2493.2	2	1247.1	-1.04	49.3	3391
LGAGGGSPEKpSPSAQELK	1	S(7): 0.0; S(11): 100.0; S(13): 0.0	468	Q9UNE7	STIP1 homology and U box-containing protein 1 OS=Homo sapiens GN=STUB1 PE=1 SV=2 - [STUB1_HUMAN]	1	Q9UNE7	S23	E3 ubiquitin-protein ligase CHIP (EC 6.3.2.-) (Antigen NY-CO-7) (CLL-associated antigen KW-8) (Carboxy terminus of Hsp70-interacting protein) (STIP1 homology and U box-containing protein 1)	STUB1 CHIP PP1131																									Reverse	Class I	lGAGGGSPEksPSAQELk	1	N-Term(Dimethyl); K10(Dimethyl); S11(Phospho); K18(Dimethyl)	111	ETD	27	1	1876.93	3	626.315	-5.4	56.87	3864
SSGpSPYGGGYGSGGGSGGYGSR	1	S(1): 0.0; S(2): 0.0; S(4): 100.0; Y(6): 0.0; Y(10): 0.0; S(12): 0.0; S(16): 0.0; Y(19): 0.0; S(21): 0.0	468	P51991	Heterogeneous nuclear ribonucleoprotein A3 OS=Homo sapiens GN=HNRNPA3 PE=1 SV=2 - [ROA3_HUMAN]	1	P51991	S358	Heterogeneous nuclear ribonucleoprotein A3 (hnRNP A3)	HNRNPA3 HNRPA3																									Reverse	Class I	sSGsPYGGGYGSGGGSGGYGSR	1	N-Term(Dimethyl:2H(4)); S4(Phospho)	120	HCD	14	0	2022.81	2	1011.91	-0.36	66.81	5399
VTQHEpSDNENEIQIQNK	1	T(2): 0.0; S(6): 100.0	465	Q5VZL5	Zinc finger MYM-type protein 4 OS=Homo sapiens GN=ZMYM4 PE=1 SV=1 - [ZMYM4_HUMAN]	1	Q5VZL5	S122	Zinc finger MYM-type protein 4 (Zinc finger protein 262)	ZMYM4 KIAA0425 ZNF262																									Reverse	Class I	vTQHEsDNENEIQIQNk	1	N-Term(Dimethyl:2H(4)); S6(Phospho); K17(Dimethyl:2H(4))	95	ETD	28	0	2170.03	3	724.013	-0.4	57.43	4077
RApSDTSLTQGIVAFR	1	S(3): 100.0; T(5): 0.0; S(6): 0.0; T(8): 0.0	465	Q9H0K1	Serine/threonine-protein kinase SNF1-like kinase 2 OS=Homo sapiens GN=SNF1LK2 PE=1 SV=1 - [SN1L2_HUMAN]	1	Q9H0K1	S587	Serine/threonine-protein kinase SIK2 (EC 2.7.11.1) (Qin-induced kinase) (Salt-inducible kinase 2) (SIK-2) (Serine/threonine-protein kinase SNF1-like kinase 2)	SIK2 KIAA0781 QIK SNF1LK2																									Reverse	Class I	rAsDTSLTQGIVAFR	1	N-Term(Dimethyl); S3(Phospho)	109	ETD	28	1	1729.88	3	577.297	8.2	130.69	8364
DWEDDpSDEDMSNFDR	1	S(6): 100.0; S(11): 0.0	465	Q15185	Prostaglandin E synthase 3 OS=Homo sapiens GN=PTGES3 PE=1 SV=1 - [TEBP_HUMAN]	1	Q15185	S113	Prostaglandin E synthase 3 (EC 5.3.99.3) (Cytosolic prostaglandin E2 synthase) (cPGES) (Hsp90 co-chaperone) (Progesterone receptor complex p23) (Telomerase-binding protein p23)	PTGES3 P23 TEBP																									Reverse	Class I	dWEDDsDEDMSNFDR	1	N-Term(Dimethyl:2H(4)); S6(Phospho)	101	ETD	13	0	1987.68	3	663.232	-1.39	128.82	9398
HQQQLLApSPGSSTVDNK	1	S(8): 100.0; S(11): 0.0; S(12): 0.0; T(13): 0.0	464	Q9C0E2	Exportin-4 OS=Homo sapiens GN=XPO4 PE=1 SV=2 - [XPO4_HUMAN]	1	Q9C0E2	S521	Exportin-4 (Exp4)	XPO4 KIAA1721																									Reverse	Class I	hQQQLLAsPGSSTVDNk	1	N-Term(Dimethyl:2H(4)); S8(Phospho); K17(Dimethyl:2H(4))	114	ETD	29	0	1953.99	3	652	-1.58	67.52	4749
AGLESGAEPGDGDpSDTTK	1	S(5): 0.0; S(14): 100.0; T(16): 0.0; T(17): 0.0	462	O60832	H/ACA ribonucleoprotein complex subunit 4 OS=Homo sapiens GN=DKC1 PE=1 SV=3 - [DKC1_HUMAN]	1	O60832	S494	H/ACA ribonucleoprotein complex subunit 4 (EC 5.4.99.-) (CBF5 homolog) (Dyskerin) (Nopp140-associated protein of 57 kDa) (Nucleolar protein NAP57) (Nucleolar protein family A member 4) (snoRNP protein DKC1)	DKC1 NOLA4																									Reverse	Class I	aGLESGAEPGDGDsDTTk	1	N-Term(Dimethyl:2H(4)); S14(Phospho); K18(Dimethyl:2H(4))	106	ETD	13	0	1850.81	3	617.61	0.25	51.92	3710
KGTENGVNGTLTSNVADpSPR	1	T(3): 0.0; T(10): 0.0; T(12): 0.0; S(13): 0.0; S(18): 100.0	461	Q15629	Translocation-associated membrane protein 1 OS=Homo sapiens GN=TRAM1 PE=1 SV=3 - [TRAM1_HUMAN]	1	Q15629	S365	Translocating chain-associated membrane protein 1	TRAM1 TRAM																									Reverse	Class I	kGTENGVNGTLTSNVADsPR	1	N-Term(Dimethyl); K1(Dimethyl); S18(Phospho)	106	ETD	29	1	2153.02	3	718.345	-1.12	61.56	4377
QLEYQQLEDDKLpSQK	1	Y(4): 0.0; S(13): 100.0	461	Q9Y2J2	Band 4.1-like protein 3 OS=Homo sapiens GN=EPB41L3 PE=1 SV=2 - [E41L3_HUMAN]	1	Q9Y2J2	S88	Band 4.1-like protein 3 (4.1B) (Differentially expressed in adenocarcinoma of the lung protein 1) (DAL-1)	EPB41L3 DAL1 KIAA0987																									Reverse	Class I	qLEYQQLEDDkLsQk	1	N-Term(Dimethyl); K11(Dimethyl); S13(Phospho); K15(Dimethyl)	93	ETD	27	1	2028.97	3	676.993	-11.49	104.12	6756
KQpSLGELIGTLNAAK	1	S(3): 100.0; T(10): 0.0	460	P60174	Triosephosphate isomerase OS=Homo sapiens GN=TPI1 PE=1 SV=2 - [TPIS_HUMAN]	1	P60174	S21	Triosephosphate isomerase (TIM) (EC 5.3.1.1) (Triose-phosphate isomerase)	TPI1 TPI																									Reverse	Class I	kQsLGELIGTLNAAk	1	N-Term(Dimethyl); K1(Dimethyl); S3(Phospho); K15(Dimethyl)	99	ETD	28	1	1706.94	3	569.652	-2.08	140.79	9138
GLLAQGLRPEpSPPPAGPLLNGAPAGESPQPK	1	S(11): 100.0; S(27): 0.0	460	Q96TA1	Niban-like protein 1 OS=Homo sapiens GN=FAM129B PE=1 SV=2 - [NIBL1_HUMAN]	1	Q96TA1	S652	Niban-like protein 1 (Meg-3) (Melanoma invasion by ERK) (MINERVA) (Protein FAM129B)	FAM129B C9orf88																									Reverse	Class I	gLLAQGLRPEsPPPAGPLLNGAPAGESPQPk	1	N-Term(Dimethyl:2H(4)); S11(Phospho); K31(Dimethyl:2H(4))	87	HCD	27	0	3160.7	3	1054.24	0.89	134.98	9182
EVDGLLTSEPMGpSPVSSK	1	T(7): 0.0; S(8): 0.0; S(13): 100.0; S(16): 0.0; S(17): 0.0	459	Q8WWM7	Ataxin-2-like protein OS=Homo sapiens GN=ATXN2L PE=1 SV=2 - [ATX2L_HUMAN]	1	Q8WWM7	S594	Ataxin-2-like protein (Ataxin-2 domain protein) (Ataxin-2-related protein)	ATXN2L A2D A2LG A2LP A2RP																									Reverse	Class I	eVDGLLTSEPMGsPVSSk	1	N-Term(Dimethyl:2H(4)); S13(Phospho); K18(Dimethyl:2H(4))	99	ETD	14	0	1976.98	3	659.664	1.35	132.67	9983
GDLpSDVEEEEEEEMDVDEATGAVK	1	S(4): 100.0; T(20): 0.0	457	Q96ST3	Paired amphipathic helix protein Sin3a OS=Homo sapiens GN=SIN3A PE=1 SV=2 - [SIN3A_HUMAN]	1	Q96ST3	S832	Paired amphipathic helix protein Sin3a (Histone deacetylase complex subunit Sin3a) (Transcriptional corepressor Sin3a)	SIN3A																									Reverse	Class I	gDLsDVEEEEEEEMDVDEATGAVk	1	N-Term(Dimethyl:2H(4)); S4(Phospho); K24(Dimethyl:2H(4))	81	HCD	11	0	2769.17	3	923.728	1.21	88.96	6744
LDLDLTADpSQPPVFK	1	T(6): 0.0; S(9): 100.0	456	Q13263	Transcription intermediary factor 1-beta OS=Homo sapiens GN=TRIM28 PE=1 SV=5 - [TIF1B_HUMAN]	1	Q13263	S501	Transcription intermediary factor 1-beta (TIF1-beta) (E3 SUMO-protein ligase TRIM28) (EC 6.3.2.-) (KRAB-associated protein 1) (KAP-1) (KRAB-interacting protein 1) (KRIP-1) (Nuclear corepressor KAP-1) (RING finger protein 96) (Tripartite motif-containing protein 28)	TRIM28 KAP1 RNF96 TIF1B																									Reverse	Class I	lDLDLTADsQPPVFk	1	N-Term(Dimethyl); S9(Phospho); K15(Dimethyl)	114	ETD	14	0	1794.9	3	598.97	1.85	145.41	11052
NLLEDDpSDEEEDFFLR	1	S(7): 100.0	455	O75379	Vesicle-associated membrane protein 4 OS=Homo sapiens GN=VAMP4 PE=1 SV=2 - [VAMP4_HUMAN]	1	O75379	S30	Vesicle-associated membrane protein 4 (VAMP-4)	VAMP4																									Reverse	Class I	nLLEDDsDEEEDFFLR	1	N-Term(Dimethyl:2H(4)); S7(Phospho)	81	ETD	13	0	2097.88	3	699.966	0.48	150.67	11021
EALHTAGYEMSLNGpSPR	1	T(5): 0.0; Y(8): 0.0; S(11): 0.0; S(15): 100.0	455	O94929	Actin-binding LIM protein 3 OS=Homo sapiens GN=ABLIM3 PE=1 SV=3 - [ABLM3_HUMAN]	1	O94929	S567	Actin-binding LIM protein 3 (abLIM-3) (Actin-binding LIM protein family member 3)	ABLIM3 KIAA0843 HMFN1661																									Reverse	Class I	eALHTAGYEMSLNGsPR	1	N-Term(Dimethyl); S15(Phospho)	107	ETD	29	0	1940.85	3	647.621	-4.12	95.7	5690
ETNLDpSLPLVDTHSK	1	T(2): 0.0; S(6): 100.0; T(12): 0.0; S(14): 0.0	455	P08670	Vimentin OS=Homo sapiens GN=VIM PE=1 SV=4 - [VIME_HUMAN]	1	P08670	S430	Vimentin	VIM																									Reverse	Class I	eTNLDsLPLVDTHSk	1	N-Term(Dimethyl); S6(Phospho); K15(Dimethyl)	99	ETD	28	0	1804.87	3	602.294	-2.2	130.72	8500
IKGSpSPGIQDTLEAEDGAFETDEAPEDR	1	S(4): 0.6; S(5): 99.4; T(11): 0.0; T(21): 0.0	454	Q9UNX4	WD repeat-containing protein 3 OS=Homo sapiens GN=WDR3 PE=1 SV=1 - [WDR3_HUMAN]	1	Q9UNX4	S241	WD repeat-containing protein 3	WDR3																									Reverse	Class I	ikGSsPGIQDTLEAEDGAFETDEAPEDR	1	N-Term(Dimethyl:2H(4)); K2(Dimethyl:2H(4)); S5(Phospho)	87	HCD	27	1	3121.43	3	1041.15	-0.63	138.03	11756
RQGpSFSEDVISHK	1	S(4): 100.0; S(6): 0.0; S(11): 0.0	454	Q9UPN3;Q96PK2	Microtubule-actin cross-linking factor 1, isoforms 1/2/3/5 OS=Homo sapiens GN=MACF1 PE=1 SV=3 - [MACF1_HUMAN]|Microtubule-actin cross-linking factor 1, isoform 4 OS=Homo sapiens GN=MACF1 PE=1 SV=1 - [MACF4_HUMAN]	2	Q9UPN3	S1860	Microtubule-actin cross-linking factor 1, isoforms 1/2/3/5 (620 kDa actin-binding protein) (ABP620) (Actin cross-linking family protein 7) (Macrophin-1) (Trabeculin-alpha)	MACF1 ABP620 ACF7 KIAA0465 KIAA1251	Q96PK2	S2362	Replaced by: Q9UPN3 = Microtubule-actin cross-linking factor 1, isoforms 1/2/3/5 (620 kDa actin-binding protein) (ABP620) (Actin cross-linking family protein 7) (Macrophin-1) (Trabeculin-alpha)	MACF1 ABP620 ACF7 KIAA0465 KIAA1251																					Reverse	Class I	rQGsFSEDVISHk	1	N-Term(Dimethyl); S4(Phospho); K13(Dimethyl)	91	ETD	32	1	1625.77	3	542.594	-0.02	74.35	4411
EMLApSDDEEDVSSKVEK	1	S(5): 100.0; S(12): 0.0; S(13): 0.0	454	Q0ZGT2	Nexilin OS=Homo sapiens GN=NEXN PE=1 SV=1 - [NEXN_HUMAN]	1	Q0ZGT2	S80	Nexilin (F-actin-binding protein) (Nelin)	NEXN																									Reverse	Class I	eMLAsDDEEDVSSkVEk	1	N-Term(Dimethyl:2H(4)); S5(Phospho); K14(Dimethyl:2H(4)); K17(Dimethyl:2H(4))	99	ETD	27	1	2086.97	3	696.328	-10.16	87.94	5800
LGDVpSPTQIDVSQFGSFK	1	S(5): 100.0; T(7): 0.0; S(12): 0.0; S(16): 0.0	453	P46821	Microtubule-associated protein 1B OS=Homo sapiens GN=MAP1B PE=1 SV=1 - [MAP1B_HUMAN]	1	P46821	S1501	Microtubule-associated protein 1B (MAP-1B) [Cleaved into: MAP1 light chain LC1]	MAP1B																									Reverse	Class I	lGDVsPTQIDVSQFGSFk	1	N-Term(Dimethyl:2H(4)); S5(Phospho); K18(Dimethyl:2H(4))	88	ETD	13	0	2069.04	3	690.353	0.19	143.92	10535
SSpSPAPADIAQTVQEDLR	1	S(1): 0.0; S(2): 0.0; S(3): 100.0; T(12): 0.0	453	Q13283	Ras GTPase-activating protein-binding protein 1 OS=Homo sapiens GN=G3BP1 PE=1 SV=1 - [G3BP1_HUMAN]	1	Q13283	S232	Ras GTPase-activating protein-binding protein 1 (G3BP-1) (EC 3.6.4.12) (EC 3.6.4.13) (ATP-dependent DNA helicase VIII) (hDH VIII) (GAP SH3 domain-binding protein 1)	G3BP1 G3BP																									Reverse	Class I	sSsPAPADIAQTVQEDLR	1	N-Term(Dimethyl:2H(4)); S3(Phospho)	127	HCD	14	0	1996.95	2	998.98	0.54	145.29	12354
KTpSLDVSNSAEPGFLAPGAR	1	T(2): 0.0; S(3): 100.0; S(7): 0.0; S(9): 0.0	453	Q8NEY1	Neuron navigator 1 OS=Homo sapiens GN=NAV1 PE=1 SV=2 - [NAV1_HUMAN]	1	Q8NEY1	S648	Neuron navigator 1 (Pore membrane and/or filament-interacting-like protein 3) (Steerin-1) (Unc-53 homolog 1) (unc53H1)	NAV1 KIAA1151 KIAA1213 POMFIL3 STEERIN1																									Reverse	Class I	kTsLDVSNSAEPGFLAPGAR	1	N-Term(Dimethyl); K1(Dimethyl); S3(Phospho)	128	ETD	28	1	2153.04	3	718.352	-10.71	116.97	7667
LTRYpSQGDDDGSSSSGGSSVAGSQSTLFK	1	T(2): 0.0; Y(4): 0.5; S(5): 99.5; S(12): 0.0; S(13): 0.0; S(14): 0.0; S(15): 0.0; S(18): 0.0; S(19): 0.0; S(23): 0.0; S(25): 0.0; T(26): 0.0	451	Q9UH99	Protein unc-84 homolog B OS=Homo sapiens GN=UNC84B PE=1 SV=3 - [UN84B_HUMAN]	1	Q9UH99	S12	SUN domain-containing protein 2 (Protein unc-84 homolog B) (Rab5-interacting protein) (Rab5IP) (Sad1/unc-84 protein-like 2)	SUN2 FRIGG KIAA0668 RAB5IP UNC84B																									Reverse	Class I	lTRYsQGDDDGSSSSGGSSVAGSQSTLFk	1	N-Term(Dimethyl); S5(Phospho); K29(Dimethyl)	115	HCD	27	1	3017.38	3	1006.47	15.25	121.87	10092
GDMpSDEDDENEFFDAPEIITMPENLGHK	1	S(4): 100.0; T(20): 0.0	451	P22059	Oxysterol-binding protein 1 OS=Homo sapiens GN=OSBP PE=1 SV=1 - [OSBP1_HUMAN]	1	P22059	S351	Oxysterol-binding protein 1	OSBP OSBP1																									Reverse	Class I	gDMsDEDDENEFFDAPEIITmPENLGHk	1	N-Term(Dimethyl); S4(Phospho); M21(Oxidation); K28(Dimethyl)	72	HCD	26	0	3347.37	3	1116.46	2.64	146.25	10208
RSLAALDALNpTDDENDEEEYEAWK	1	S(2): 0.0; T(11): 100.0; Y(20): 0.0	451	P55081	Microfibrillar-associated protein 1 OS=Homo sapiens GN=MFAP1 PE=1 SV=2 - [MFAP1_HUMAN]	1	P55081	T267	Microfibrillar-associated protein 1	MFAP1																									Reverse	Class I	rSLAALDALNtDDENDEEEYEAWk	1	N-Term(Dimethyl:2H(4)); T11(Phospho); K24(Dimethyl:2H(4))	89	HCD	29	1	2941.28	3	981.097	-15.77	137.48	7922
DGGRSpSPGGQDEGGFMAQGK	1	S(5): 0.0; S(6): 100.0	450	P49023	Paxillin OS=Homo sapiens GN=PXN PE=1 SV=2 - [PAXI_HUMAN]	1	P49023	S303	Paxillin	PXN																									Reverse	Class I	dGGRSsPGGQDEGGFmAQGk	1	N-Term(Dimethyl:2H(4)); S6(Phospho); M16(Oxidation); K20(Dimethyl:2H(4))	109	ETD	27	1	2097.91	3	699.976	-0.28	46.6	3193
LTFDSSFpSPNTGKK	1	T(2): 0.0; S(5): 0.0; S(6): 0.0; S(8): 100.0; T(11): 0.0	450	P21796	Voltage-dependent anion-selective channel protein 1 OS=Homo sapiens GN=VDAC1 PE=1 SV=2 - [VDAC1_HUMAN]	1	P21796	S104	Voltage-dependent anion-selective channel protein 1 (VDAC-1) (hVDAC1) (Outer mitochondrial membrane protein porin 1) (Plasmalemmal porin) (Porin 31HL) (Porin 31HM)	VDAC1 VDAC																									Reverse	Class I	lTFDSSFsPNTGkk	1	N-Term(Dimethyl); S8(Phospho); K13(Dimethyl); K14(Dimethyl)	83	ETD	28	1	1692.82	3	564.945	-3.03	112.98	7468
SVGGSGGGpSFGDNLVTR	1	S(1): 0.0; S(5): 0.0; S(9): 100.0; T(16): 0.0	450	P02545	Lamin-A/C OS=Homo sapiens GN=LMNA PE=1 SV=1 - [LMNA_HUMAN]	1	P02545	S636	Prelamin-A/C [Cleaved into: Lamin-A/C (70 kDa lamin) (Renal carcinoma antigen NY-REN-32)]	LMNA LMN1																									Reverse	Class I	sVGGSGGGsFGDNLVTR	1	N-Term(Dimethyl:2H(4)); S9(Phospho)	119	ETD	14	0	1678.77	3	560.263	-0.09	108.25	8258
VEQALSEVASpSLQSSAPK	1	S(6): 0.0; S(10): 0.0; S(11): 100.0; S(14): 0.0; S(15): 0.0	450	Q86TV6	Tetratricopeptide repeat protein 7B OS=Homo sapiens GN=TTC7B PE=1 SV=2 - [TTC7B_HUMAN]	1	Q86TV6	S576	Tetratricopeptide repeat protein 7B (TPR repeat protein 7B) (Tetratricopeptide repeat protein 7-like-1) (TPR repeat protein 7-like-1)	TTC7B TTC7L1																									Reverse	Class I	vEQALSEVASsLQSSAPk	1	N-Term(Dimethyl); S11(Phospho); K18(Dimethyl)	97	ETD	14	0	1966.97	3	656.329	-0.12	117.24	8881
RAADEDWDpSELEDDLLGEDLLSGK	1	S(9): 100.0; S(22): 0.0	450	Q96EV2	RNA-binding protein 33 OS=Homo sapiens GN=RBM33 PE=1 SV=2 - [RBM33_HUMAN]	1	Q96EV2	S41	RNA-binding protein 33 (Proline-rich protein 8) (RNA-binding motif protein 33)	RBM33 PRR8																									Reverse	Class I	rAADEDWDsELEDDLLGEDLLSGk	1	N-Term(Dimethyl); S9(Phospho); K24(Dimethyl)	83	HCD	28	1	2827.26	3	943.092	1.95	151.72	9634
NYQQNYQNpSESGEK	1	Y(2): 0.0; Y(6): 0.0; S(9): 100.0; S(11): 0.0	449	P67809	Nuclease-sensitive element-binding protein 1 OS=Homo sapiens GN=YBX1 PE=1 SV=3 - [YBOX1_HUMAN]	1	P67809	S165	Nuclease-sensitive element-binding protein 1 (CCAAT-binding transcription factor I subunit A) (CBF-A) (DNA-binding protein B) (DBPB) (Enhancer factor I subunit A) (EFI-A) (Y-box transcription factor) (Y-box-binding protein 1) (YB-1)	YBX1 NSEP1 YB1																									Reverse	Class I	nYQQNYQNsESGEk	1	N-Term(Dimethyl:2H(4)); S9(Phospho); K14(Dimethyl:2H(4))	100	ETD	14	0	1832.79	3	611.602	-0.63	42.5	3034
LPSGpSGAApSPTGSAVDIR	2	S(3): 0.0; S(5): 100.0; S(9): 100.0; T(11): 0.0; S(13): 0.0	449	Q09666	Neuroblast differentiation-associated protein AHNAK OS=Homo sapiens GN=AHNAK PE=1 SV=2 - [AHNK_HUMAN]	1	Q09666	S212, S216	Neuroblast differentiation-associated protein AHNAK (Desmoyokin)	AHNAK PM227																									Reverse	Class I	lPSGsGAAsPTGSAVDIR	1	N-Term(Dimethyl); S5(Phospho); S9(Phospho)	110	ETD	7	0	1830.8	3	610.939	-0.46	62.4	4325
LSLEGDHSTPPSApYGSVK	1	S(2): 0.0; S(8): 0.0; T(9): 0.0; S(12): 0.0; Y(14): 100.0; S(16): 0.0	449	P07355;A6NMY6	Annexin A2 OS=Homo sapiens GN=ANXA2 PE=1 SV=2 - [ANXA2_HUMAN]|Putative annexin A2-like protein OS=Homo sapiens GN=ANXA2P2 PE=5 SV=2 - [AXA2L_HUMAN]	2	P07355	Y24	Annexin A2 (Annexin II) (Annexin-2) (Calpactin I heavy chain) (Calpactin-1 heavy chain) (Chromobindin-8) (Lipocortin II) (Placental anticoagulant protein IV) (PAP-IV) (Protein I) (p36)	ANXA2 ANX2 ANX2L4 CAL1H LPC2D	A6NMY6	Y24	Putative annexin A2-like protein (Annexin A2 pseudogene 2) (Lipocortin II pseudogene)	ANXA2P2 ANX2L2 ANX2P2 LPC2B																					Reverse	Class I	lSLEGDHSTPPSAyGSVk	1	N-Term(Dimethyl); Y14(Phospho); K18(Dimethyl)	94	HCD	28	0	1980.96	2	990.983	13.85	105.16	9028
RLLEDGEDFNLGDALDSpSNSMQTIQK	1	S(17): 0.0; S(18): 100.0; S(20): 0.0; T(23): 0.0	449	P05783	Keratin, type I cytoskeletal 18 OS=Homo sapiens GN=KRT18 PE=1 SV=2 - [K1C18_HUMAN]	1	P05783	S399	Keratin, type I cytoskeletal 18 (Cell proliferation-inducing gene 46 protein) (Cytokeratin-18) (CK-18) (Keratin-18) (K18)	KRT18 CYK18 PIG46																									Reverse	Class I	rLLEDGEDFNLGDALDSsNSmQTIQk	1	N-Term(Dimethyl:2H(4)); S18(Phospho); M21(Oxidation); K26(Dimethyl:2H(4))	64	HCD	28	1	3056.43	3	1019.48	-2.7	139.43	9044
RILEPDDFLDDLDDEDYEEDpTPK	1	Y(17): 0.0; T(21): 100.0	449	Q92785	Zinc finger protein ubi-d4 OS=Homo sapiens GN=DPF2 PE=1 SV=2 - [REQU_HUMAN]	1	Q92785	T176	Zinc finger protein ubi-d4 (Apoptosis response zinc finger protein) (BRG1-associated factor 45D) (BAF45D) (D4, zinc and double PHD fingers family 2) (Protein requiem)	DPF2 BAF45D REQ UBID4																									Reverse	Class I	rILEPDDFLDDLDDEDYEEDtPk	1	N-Term(Dimethyl); T21(Phospho); K23(Dimethyl)	78	HCD	28	1	2933.25	3	978.422	0.64	149.91	9716
AApSGGAALASPGPGTGSGAPAGSGGK	1	S(3): 100.0; S(10): 0.0; T(15): 0.0; S(17): 0.0; S(23): 0.0	448	Q5U651	Ras-interacting protein 1 OS=Homo sapiens GN=RASIP1 PE=1 SV=1 - [RAIN_HUMAN]	1	Q5U651	S292	Ras-interacting protein 1 (Rain)	RASIP1																									Reverse	Class I	aAsGGAALASPGPGTGSGAPAGSGGk	1	N-Term(Dimethyl); S3(Phospho); K26(Dimethyl)	132	HCD	13	0	2147.01	2	1074.01	-0.23	60.39	4356
LGSLSARpSDSEATISR	1	S(3): 0.0; S(5): 0.0; S(8): 100.0; S(10): 0.0; T(13): 0.0; S(15): 0.0	448	Q5SW79	Centrosomal protein of 170 kDa OS=Homo sapiens GN=CEP170 PE=1 SV=1 - [CE170_HUMAN]	1	Q5SW79	S1165	Centrosomal protein of 170 kDa (Cep170) (KARP-1-binding protein) (KARP1-binding protein)	CEP170 FAM68A KAB KIAA0470																									Reverse	Class I	lGSLSARsDSEATISR	1	N-Term(Dimethyl:2H(4)); S8(Phospho)	108	ETD	28	1	1761.86	3	587.96	-2.21	76.67	5311
GTGQpSDDpSDIWDDTALIK	2	T(2): 0.0; S(5): 100.0; S(8): 100.0; T(14): 0.0	448	Q16637	Survival motor neuron protein OS=Homo sapiens GN=SMN1 PE=1 SV=1 - [SMN_HUMAN]	1	Q16637	S28, S31	Survival motor neuron protein (Component of gems 1) (Gemin-1)	SMN1 SMN SMNT; SMN2 SMNC																									Reverse	Class I	gTGQsDDsDIWDDTALIk	1	N-Term(Dimethyl:2H(4)); S5(Phospho); S8(Phospho); K18(Dimethyl:2H(4))	90	ETD	6	0	2160.92	3	720.98	0.85	93.91	6813
AADpSDDGAVSAPAASDGGVSK	1	S(4): 100.0; S(10): 0.0; S(15): 0.0; S(20): 0.0	447	Q96GM8	Target of EGR1 protein 1 OS=Homo sapiens GN=TOE1 PE=1 SV=1 - [TOE1_HUMAN]	1	Q96GM8	S5	Target of EGR1 protein 1	TOE1																									Reverse	Class I	aADsDDGAVSAPAASDGGVSk	1	N-Term(Dimethyl); S4(Phospho); K21(Dimethyl)	123	HCD	13	0	1983.86	2	992.432	0.75	56.23	4047
RApSDGGANIQLHAQQLLK	1	S(3): 100.0	447	Q9Y2K2	Serine/threonine-protein kinase QSK OS=Homo sapiens GN=QSK PE=1 SV=3 - [QSK_HUMAN]	1	Q9Y2K2	S493	Serine/threonine-protein kinase SIK3 (EC 2.7.11.1) (Salt-inducible kinase 3) (SIK-3) (Serine/threonine-protein kinase QSK)	SIK3 KIAA0999 QSK L19																									Reverse	Class I	rAsDGGANIQLHAQQLLk	1	N-Term(Dimethyl); S3(Phospho); K18(Dimethyl)	101	ETD	31	1	2056.07	3	686.028	-0.87	111.26	6445
DNQESpSDAELSSSEYIK	1	S(5): 0.0; S(6): 100.0; S(11): 0.0; S(12): 0.0; S(13): 0.0; Y(15): 0.0	447	Q96JM3	Zinc finger protein 828 OS=Homo sapiens GN=ZNF828 PE=1 SV=2 - [ZN828_HUMAN]	1	Q96JM3	S627	Chromosome alignment-maintaining phosphoprotein 1 (Zinc finger protein 828)	CHAMP1 C13orf8 CAMP KIAA1802 ZNF828																									Reverse	Class I	dNQESsDAELSSSEYIk	1	N-Term(Dimethyl:2H(4)); S6(Phospho); K17(Dimethyl:2H(4))	80	ETD	13	0	2045.9	3	682.64	0.42	100.2	7418
RAFQLEEGEEpTEPDCK	1	T(11): 100.0	446	P38432	Coilin OS=Homo sapiens GN=COIL PE=1 SV=1 - [P80C_HUMAN]	1	P38432	T122	Coilin (p80)	COIL CLN80																									Reverse	Class I	rAFQLEEGEEtEPDck	1	N-Term(Dimethyl:2H(4)); T11(Phospho); C15(Carbamidomethyl); K16(Dimethyl:2H(4))	98	ETD	29	1	2081.93	3	694.649	-0.49	82.2	5660
GYNHGQGSYSYSNSYNpSPGGGGGSDYNYESK	1	Y(2): 0.0; S(8): 0.0; Y(9): 0.0; S(10): 0.0; Y(11): 0.0; S(12): 0.0; S(14): 0.0; Y(15): 0.0; S(17): 100.0; S(24): 0.0; Y(26): 0.0; Y(28): 0.0; S(30): 0.0	446	Q12906	Interleukin enhancer-binding factor 3 OS=Homo sapiens GN=ILF3 PE=1 SV=3 - [ILF3_HUMAN]	1	Q12906	S792	Interleukin enhancer-binding factor 3 (Double-stranded RNA-binding protein 76) (DRBP76) (M-phase phosphoprotein 4) (MPP4) (Nuclear factor associated with dsRNA) (NFAR) (Nuclear factor of activated T-cells 90 kDa) (NF-AT-90) (Translational control protein 80) (TCP80)	ILF3 DRBF MPHOSPH4 NF90																									Reverse	Class I	gYNHGQGSYSYSNSYNsPGGGGGSDYNYESk	1	N-Term(Dimethyl:2H(4)); S17(Phospho); K31(Dimethyl:2H(4))	102	HCD	30	0	3397.38	3	1133.13	0.25	89.55	7330
SQSSHpSYDDSTLPLIDR	1	S(1): 0.0; S(3): 0.0; S(4): 0.0; S(6): 100.0; Y(7): 0.0; S(10): 0.0; T(11): 0.0	445	O60716	Catenin delta-1 OS=Homo sapiens GN=CTNND1 PE=1 SV=1 - [CTND1_HUMAN]	1	O60716	S864	Catenin delta-1 (Cadherin-associated Src substrate) (CAS) (p120 catenin) (p120(ctn)) (p120(cas))	CTNND1 KIAA0384																									Reverse	Class I	sQSSHsYDDSTLPLIDR	1	N-Term(Dimethyl); S6(Phospho)	73	ETD	28	0	2028.92	3	676.979	15.11	113.67	7496
EELMSpSDLEETAGSTSIPK	1	S(5): 0.0; S(6): 100.0; T(11): 0.0; S(14): 0.0; T(15): 0.0; S(16): 0.0	445	O00567	Nucleolar protein 5A OS=Homo sapiens GN=NOL5A PE=1 SV=4 - [NOL5A_HUMAN]	1	O00567	S520	Nucleolar protein 56 (Nucleolar protein 5A)	NOP56 NOL5A																									Reverse	Class I	eELMSsDLEETAGSTSIPk	1	N-Term(Dimethyl:2H(4)); S6(Phospho); K19(Dimethyl:2H(4))	94	ETD	13	0	2168.02	3	723.343	-0.5	133.62	9725
LNRSDpSDSSTLAKK	1	S(4): 0.0; S(6): 100.0; S(8): 0.0; S(9): 0.0; T(10): 0.0	444	Q6AWC2	Protein WWC2 OS=Homo sapiens GN=WWC2 PE=1 SV=2 - [WWC2_HUMAN]	1	Q6AWC2	S1022	Protein WWC2 (BH-3-only member B) (WW domain-containing protein 2)	WWC2 BOMB																									Reverse	Class I	lNRSDsDSSTLAkk	1	N-Term(Dimethyl); S6(Phospho); K13(Dimethyl); K14(Dimethyl)	110	ETD	32	2	1685.85	3	562.62	-0.94	30.75	2224
SQSSHSYDDSpTLPLIDR	1	S(1): 0.0; S(3): 0.0; S(4): 0.0; S(6): 0.0; Y(7): 0.0; S(10): 0.0; T(11): 100.0	444	O60716	Catenin delta-1 OS=Homo sapiens GN=CTNND1 PE=1 SV=1 - [CTND1_HUMAN]	1	O60716	T869	Catenin delta-1 (Cadherin-associated Src substrate) (CAS) (p120 catenin) (p120(ctn)) (p120(cas))	CTNND1 KIAA0384																									Reverse	Class I	sQSSHSYDDStLPLIDR	1	N-Term(Dimethyl); T11(Phospho)	72	ETD	29	0	2028.92	3	676.977	12.77	105.94	6238
ASLQSGQEGAGDpSPGSQFSK	1	S(2): 0.0; S(5): 0.0; S(13): 100.0; S(16): 0.0; S(19): 0.0	443	Q12778	Forkhead box protein O1 OS=Homo sapiens GN=FOXO1 PE=1 SV=2 - [FOXO1_HUMAN]	1	Q12778	S287	Forkhead box protein O1 (Forkhead box protein O1A) (Forkhead in rhabdomyosarcoma)	FOXO1 FKHR FOXO1A																									Reverse	Class I	aSLQSGQEGAGDsPGSQFSk	1	N-Term(Dimethyl); S13(Phospho); K20(Dimethyl)	91	ETD	14	0	2073.92	3	691.977	1.68	75.53	5746
LGAGGGpSPEKSPSAQELK	1	S(7): 100.0; S(11): 0.0; S(13): 0.0	442	Q9UNE7	STIP1 homology and U box-containing protein 1 OS=Homo sapiens GN=STUB1 PE=1 SV=2 - [STUB1_HUMAN]	1	Q9UNE7	S19	E3 ubiquitin-protein ligase CHIP (EC 6.3.2.-) (Antigen NY-CO-7) (CLL-associated antigen KW-8) (Carboxy terminus of Hsp70-interacting protein) (STIP1 homology and U box-containing protein 1)	STUB1 CHIP PP1131																									Reverse	Class I	lGAGGGsPEkSPSAQELk	1	N-Term(Dimethyl:2H(4)); S7(Phospho); K10(Dimethyl:2H(4)); K18(Dimethyl:2H(4))	108	ETD	27	1	1889.02	3	630.344	0.03	62.55	4271
EAPAEGEAAEPGpSPTAAEGEAASAASSTSSPK	1	S(13): 99.5; T(15): 0.5; S(23): 0.0; S(26): 0.0; S(27): 0.0; T(28): 0.0; S(29): 0.0; S(30): 0.0	442	P29966	Myristoylated alanine-rich C-kinase substrate OS=Homo sapiens GN=MARCKS PE=1 SV=4 - [MARCS_HUMAN]	1	P29966	S118	Myristoylated alanine-rich C-kinase substrate (MARCKS) (Protein kinase C substrate, 80 kDa protein, light chain) (80K-L protein) (PKCSL)	MARCKS MACS PRKCSL																									Reverse	Class I	eAPAEGEAAEPGsPTAAEGEAASAASSTSSPk	1	N-Term(Dimethyl:2H(4)); S13(Phospho); K32(Dimethyl:2H(4))	89	HCD	13	0	3059.38	3	1020.46	-0.47	94.8	7022
LGGLRPEpSPESLTSVSR	1	S(8): 100.0; S(11): 0.0; T(13): 0.0; S(14): 0.0; S(16): 0.0	442	Q9H6F5	Coiled-coil domain-containing protein 86 OS=Homo sapiens GN=CCDC86 PE=1 SV=1 - [CCD86_HUMAN]	1	Q9H6F5	S18	Coiled-coil domain-containing protein 86 (Cytokine-induced protein with coiled-coil domain)	CCDC86 CYCLON																									Reverse	Class I	lGGLRPEsPESLTSVSR	1	N-Term(Dimethyl); S8(Phospho)	84	ETD	28	0	1892.95	3	631.655	0.85	109.27	7250
RILpSDVTHSAVFGVPASK	1	S(4): 100.0; T(7): 0.0; S(9): 0.0; S(17): 0.0	441	Q2M2I8	AP2-associated protein kinase 1 OS=Homo sapiens GN=AAK1 PE=1 SV=2 - [AAK1_HUMAN]	1	Q2M2I8	S637	AP2-associated protein kinase 1 (EC 2.7.11.1) (Adaptor-associated kinase 1)	AAK1 KIAA1048																									Reverse	Class I	rILsDVTHSAVFGVPASk	1	N-Term(Dimethyl); S4(Phospho); K18(Dimethyl)	108	ETD	31	1	2020.06	3	674.026	0.69	137.15	11804
LESTESRSpSFSQHAR	1	S(3): 0.0; T(4): 0.0; S(6): 0.0; S(8): 0.0; S(9): 100.0; S(11): 0.0	441	P02545	Lamin-A/C OS=Homo sapiens GN=LMNA PE=1 SV=1 - [LMNA_HUMAN]	1	P02545	S429	Prelamin-A/C [Cleaved into: Lamin-A/C (70 kDa lamin) (Renal carcinoma antigen NY-REN-32)]	LMNA LMN1																									Reverse	Class I	lESTESRSsFSQHAR	1	N-Term(Dimethyl); S9(Phospho)	94	ETD	32	1	1829.82	3	610.61	-1.03	37.3	2604
TLLSESSSQSSKpSPSLSSK	1	T(1): 0.0; S(4): 0.0; S(6): 0.0; S(7): 0.0; S(8): 0.0; S(10): 0.0; S(11): 0.0; S(13): 100.0; S(15): 0.0; S(17): 0.0; S(18): 0.0	441	Q9UPU5	Ubiquitin carboxyl-terminal hydrolase 24 OS=Homo sapiens GN=USP24 PE=1 SV=2 - [UBP24_HUMAN]	1	Q9UPU5	S391	Ubiquitin carboxyl-terminal hydrolase 24 (EC 3.4.19.12) (Deubiquitinating enzyme 24) (Ubiquitin thioesterase 24) (Ubiquitin-specific-processing protease 24)	USP24 KIAA1057																									Reverse	Class I	tLLSESSSQSSksPSLSSk	1	N-Term(Dimethyl:2H(4)); K12(Dimethyl:2H(4)); S13(Phospho); K19(Dimethyl:2H(4))	104	ETD	27	1	2116.11	3	706.043	-2.08	68.46	4601
SESLIDASEDpSQLEAAIR	1	S(1): 0.0; S(3): 0.0; S(8): 0.0; S(11): 100.0	441	O94888	UBX domain-containing protein 7 OS=Homo sapiens GN=UBXD7 PE=1 SV=2 - [UBXD7_HUMAN]	1	O94888	S288	UBX domain-containing protein 7	UBXN7 KIAA0794 UBXD7																									Reverse	Class I	sESLIDASEDsQLEAAIR	1	N-Term(Dimethyl); S11(Phospho)	99	ETD	1-3	0	2041.93	3	681.316	0.28	87.32	6988
ASLGpSLEGEAEAEASSPK	1	S(2): 0.0; S(5): 100.0; S(15): 0.0; S(16): 0.0	440	Q09666	Neuroblast differentiation-associated protein AHNAK OS=Homo sapiens GN=AHNAK PE=1 SV=2 - [AHNK_HUMAN]	1	Q09666	S5752	Neuroblast differentiation-associated protein AHNAK (Desmoyokin)	AHNAK PM227																									Reverse	Class I	aSLGsLEGEAEAEASSPk	1	N-Term(Dimethyl); S5(Phospho); K18(Dimethyl)	101	ETD	13	0	1868.85	3	623.623	0.77	138.95	10150
RSLpSEEKEDHSDGLAGLK	1	S(2): 0.0; S(4): 100.0; S(11): 0.0	440	Q6P0Q8	Microtubule-associated serine/threonine-protein kinase 2 OS=Homo sapiens GN=MAST2 PE=1 SV=2 - [MAST2_HUMAN]	1	Q6P0Q8	S876	Microtubule-associated serine/threonine-protein kinase 2 (EC 2.7.11.1)	MAST2 KIAA0807 MAST205																									Reverse	Class I	rSLsEEkEDHSDGLAGLk	1	N-Term(Dimethyl); S4(Phospho); K7(Dimethyl); K18(Dimethyl)	112	ETD	37	2	2135.04	3	712.351	-0.42	53.3	3510
TWDDDpSDPESETDPDAQAK	1	T(1): 0.0; S(6): 100.0; S(10): 0.0; T(12): 0.0	440	Q5XUX1	F-box/WD repeat-containing protein 9 OS=Homo sapiens GN=FBXW9 PE=2 SV=2 - [FBXW9_HUMAN]	1	Q5XUX1	S18	F-box/WD repeat-containing protein 9 (F-box and WD-40 domain-containing protein 9)	FBXW9 FBW9																									Reverse	Class I	tWDDDsDPESETDPDAQAk	1	N-Term(Dimethyl:2H(4)); S6(Phospho); K19(Dimethyl:2H(4))	109	HCD	13	0	2265.92	2	1133.46	1.02	82.08	6060
VNLEESSGVENpSPAGARPK	1	S(6): 0.0; S(7): 0.0; S(12): 100.0	440	Q8WVM8	Sec1 family domain-containing protein 1 OS=Homo sapiens GN=SCFD1 PE=1 SV=4 - [SCFD1_HUMAN]	1	Q8WVM8	S303	Sec1 family domain-containing protein 1 (SLY1 homolog) (Sly1p) (Syntaxin-binding protein 1-like 2)	SCFD1 C14orf163 KIAA0917 STXBP1L2 FKSG23																									Reverse	Class I	vNLEESSGVENsPAGARPk	1	N-Term(Dimethyl:2H(4)); S12(Phospho); K19(Dimethyl:2H(4))	107	HCD	28	0	2085.05	2	1043.03	1.75	85.7	7236
ILLVDpSPGMGNADDEQQEEGTSSK	1	S(6): 100.0; T(21): 0.0; S(22): 0.0; S(23): 0.0	440	Q9UKN8	General transcription factor 3C polypeptide 4 OS=Homo sapiens GN=GTF3C4 PE=1 SV=1 - [TF3C4_HUMAN]	1	Q9UKN8	S611	General transcription factor 3C polypeptide 4 (EC 2.3.1.48) (TF3C-delta) (Transcription factor IIIC 90 kDa subunit) (TFIIIC 90 kDa subunit) (TFIIIC90) (Transcription factor IIIC subunit delta)	GTF3C4																									Reverse	Class I	iLLVDsPGMGNADDEQQEEGTSSk	1	N-Term(Dimethyl:2H(4)); S6(Phospho); K24(Dimethyl:2H(4))	95	HCD	13	0	2664.22	3	888.744	-0.83	121.3	8880
EGLGQGQpSLEQLEALVQTK	1	S(8): 100.0; T(18): 0.0	439	Q9NSC5	Homer protein homolog 3 OS=Homo sapiens GN=HOMER3 PE=1 SV=2 - [HOME3_HUMAN]	1	Q9NSC5	S256	Homer protein homolog 3 (Homer-3)	HOMER3																									Reverse	Class I	eGLGQGQsLEQLEALVQTk	1	N-Term(Dimethyl); S8(Phospho); K19(Dimethyl)	127	ETD	13	0	2164.09	3	722.034	-1.18	147.12	10777
YDGEpSDKEQFDDDQK	1	Y(1): 0.0; S(5): 100.0	439	Q08AD1	Calmodulin-regulated spectrin-associated protein 1-like protein 1 OS=Homo sapiens GN=CAMSAP1L1 PE=1 SV=2 - [CA1L1_HUMAN]	1	Q08AD1	S1148	Calmodulin-regulated spectrin-associated protein 2 (Calmodulin-regulated spectrin-associated protein 1-like protein 1)	CAMSAP2 CAMSAP1L1 KIAA1078																									Reverse	Class I	yDGEsDkEQFDDDQk	1	N-Term(Dimethyl); S5(Phospho); K7(Dimethyl); K15(Dimethyl)	91	ETD	27	1	1982.78	3	661.599	-3.62	56.1	3817
TIGGGDDpSFNTFFSETGAGK	1	T(1): 0.0; S(8): 100.0; T(11): 0.0; S(14): 0.0; T(16): 0.0	438	Q71U36;P68363;Q9BQE3	Tubulin alpha-1A chain OS=Homo sapiens GN=TUBA1A PE=1 SV=1 - [TBA1A_HUMAN]|Tubulin alpha-1B chain OS=Homo sapiens GN=TUBA1B PE=1 SV=1 - [TBA1B_HUMAN]|Tubulin alpha-1C chain OS=Homo sapiens GN=TUBA1C PE=1 SV=1 - [TBA1C_HUMAN]	3	Q71U36	S48	Tubulin alpha-1A chain (Alpha-tubulin 3) (Tubulin B-alpha-1) (Tubulin alpha-3 chain)	TUBA1A TUBA3	P68363	S48	Tubulin alpha-1B chain (Alpha-tubulin ubiquitous) (Tubulin K-alpha-1) (Tubulin alpha-ubiquitous chain)	TUBA1B	Q9BQE3	S48	Tubulin alpha-1C chain (Alpha-tubulin 6) (Tubulin alpha-6 chain)	TUBA1C TUBA6																	Reverse	Class I	tIGGGDDsFNTFFSETGAGk	1	N-Term(Dimethyl); S8(Phospho); K20(Dimethyl)	104	ETD	13	0	2143.93	3	715.314	2.03	144.26	10561
ERIQQFDDGGpSDEEDIWEEK	1	S(11): 100.0	438	Q5H9R7	SAPS domain family member 3 OS=Homo sapiens GN=SAPS3 PE=1 SV=2 - [SAPS3_HUMAN]	1	Q5H9R7	S617	Serine/threonine-protein phosphatase 6 regulatory subunit 3 (SAPS domain family member 3) (Sporulation-induced transcript 4-associated protein SAPL)	PPP6R3 C11orf23 KIAA1558 PP6R3 SAPL SAPS3																									Reverse	Class I	eRIQQFDDGGsDEEDIWEEk	1	N-Term(Dimethyl); S11(Phospho); K20(Dimethyl)	108	HCD	28	1	2561.07	3	854.362	0.48	135.57	11477
AASGGAALApSPGPGTGSGAPAGSGGK	1	S(3): 0.0; S(10): 100.0; T(15): 0.0; S(17): 0.0; S(23): 0.0	438	Q5U651	Ras-interacting protein 1 OS=Homo sapiens GN=RASIP1 PE=1 SV=1 - [RAIN_HUMAN]	1	Q5U651	S299	Ras-interacting protein 1 (Rain)	RASIP1																									Reverse	Class I	aASGGAALAsPGPGTGSGAPAGSGGk	1	N-Term(Dimethyl:2H(4)); S10(Phospho); K26(Dimethyl:2H(4))	151	ETD	14	0	2155.06	3	719.026	0.71	54.04	3936
DSGRGDpSVSDSGSDALR	1	S(2): 0.0; S(7): 100.0; S(9): 0.0; S(11): 0.0; S(13): 0.0	437	Q53EL6	Programmed cell death protein 4 OS=Homo sapiens GN=PDCD4 PE=1 SV=1 - [PDCD4_HUMAN]	1	Q53EL6	S76	Programmed cell death protein 4 (Neoplastic transformation inhibitor protein) (Nuclear antigen H731-like) (Protein 197/15a)	PDCD4 H731																									Reverse	Class I	dSGRGDsVSDSGSDALR	1	N-Term(Dimethyl); S7(Phospho)	100	ETD	27	1	1788.74	3	596.917	-2.03	45.38	3106
RDpSLGAYASQDANEQGQDLGK	1	S(3): 100.0; Y(7): 0.0; S(9): 0.0	437	Q9C0C2	182 kDa tankyrase 1-binding protein OS=Homo sapiens GN=TNKS1BP1 PE=1 SV=3 - [TB182_HUMAN]	1	Q9C0C2	S893	182 kDa tankyrase-1-binding protein	TNKS1BP1 KIAA1741 TAB182																									Reverse	Class I	rDsLGAYASQDANEQGQDLGk	1	N-Term(Dimethyl); S3(Phospho); K21(Dimethyl)	64	HCD	28	1	2359.08	3	787.03	8.01	100.99	8644
KVVEAVNpSDpSDSEFGIPK	2	S(8): 100.0; S(10): 100.0; S(12): 0.0	436	Q02880	DNA topoisomerase 2-beta OS=Homo sapiens GN=TOP2B PE=1 SV=3 - [TOP2B_HUMAN]	1	Q02880	S1522, S1524	DNA topoisomerase 2-beta (EC 5.99.1.3) (DNA topoisomerase II, beta isozyme)	TOP2B																									Reverse	Class I	kVVEAVNsDsDSEFGIPk	1	N-Term(Dimethyl); K1(Dimethyl); S8(Phospho); S10(Phospho); K18(Dimethyl)	95	ETD	18-20	1	2164.98	3	722.332	-0.44	79.62	5267
SSpSLVDIREEETEGGSR	1	S(1): 0.0; S(2): 0.0; S(3): 100.0; T(12): 0.0; S(16): 0.0	436	Q96Q42	Alsin OS=Homo sapiens GN=ALS2 PE=1 SV=1 - [ALS2_HUMAN]	1	Q96Q42	S466	Alsin (Amyotrophic lateral sclerosis 2 chromosomal region candidate gene 6 protein) (Amyotrophic lateral sclerosis 2 protein)	ALS2 ALS2CR6 KIAA1563																									Reverse	Class I	sSsLVDIREEETEGGSR	1	N-Term(Dimethyl); S3(Phospho)	88	ETD	28	1	1958.87	3	653.628	-0.2	84.16	5824
LPSGSGAApSPTGSAVDIR	1	S(3): 0.0; S(5): 0.0; S(9): 100.0; T(11): 0.0; S(13): 0.0	436	Q09666	Neuroblast differentiation-associated protein AHNAK OS=Homo sapiens GN=AHNAK PE=1 SV=2 - [AHNK_HUMAN]	1	Q09666	S216	Neuroblast differentiation-associated protein AHNAK (Desmoyokin)	AHNAK PM227																									Reverse	Class I	lPSGSGAAsPTGSAVDIR	1	N-Term(Dimethyl); S9(Phospho)	128	ETD	14	0	1750.84	3	584.284	0.76	84.06	6421
TTQSMQDFPVVDpSEEEAEEEFQK	1	T(1): 0.0; T(2): 0.0; S(4): 0.0; S(13): 100.0	435	Q9UBB9	Tuftelin-interacting protein 11 OS=Homo sapiens GN=TFIP11 PE=1 SV=1 - [TFP11_HUMAN]	1	Q9UBB9	S210	Tuftelin-interacting protein 11 (Septin and tuftelin-interacting protein 1) (STIP-1)	TFIP11 STIP HSPC006																									Reverse	Class I	tTQSmQDFPVVDsEEEAEEEFQk	1	N-Term(Dimethyl); M5(Oxidation); S13(Phospho); K23(Dimethyl)	65	HCD	14	0	2855.18	3	952.4	-0.4	136.22	11394
VDDDpSLGEFPVTNSR	1	S(5): 100.0; T(12): 0.0; S(14): 0.0	435	Q92785	Zinc finger protein ubi-d4 OS=Homo sapiens GN=DPF2 PE=1 SV=2 - [REQU_HUMAN]	1	Q92785	S142	Zinc finger protein ubi-d4 (Apoptosis response zinc finger protein) (BRG1-associated factor 45D) (BAF45D) (D4, zinc and double PHD fingers family 2) (Protein requiem)	DPF2 BAF45D REQ UBID4																									Reverse	Class I	vDDDsLGEFPVTNSR	1	N-Term(Dimethyl); S5(Phospho)	89	ETD	14	0	1758.76	3	586.925	0.59	119.29	9028
EQGGSGLGSGSpSGGGGSTSGLGSGYIGR	1	S(5): 0.0; S(9): 0.0; S(11): 0.5; S(12): 99.5; S(17): 0.0; T(18): 0.0; S(19): 0.0; S(23): 0.0; Y(25): 0.0	434	Q2M2I8	AP2-associated protein kinase 1 OS=Homo sapiens GN=AAK1 PE=1 SV=2 - [AAK1_HUMAN]	1	Q2M2I8	S21	AP2-associated protein kinase 1 (EC 2.7.11.1) (Adaptor-associated kinase 1)	AAK1 KIAA1048																									Reverse	Class I	eQGGSGLGSGSsGGGGSTSGLGSGYIGR	1	N-Term(Dimethyl:2H(4)); S12(Phospho)	117	HCD	14	0	2498.11	2	1249.56	1.76	108.23	8954
KDpSLPDADLASCGSLSQSSASFFTPR	1	S(3): 100.0; S(11): 0.0; S(14): 0.0; S(16): 0.0; S(18): 0.0; S(19): 0.0; S(21): 0.0; T(24): 0.0	433	Q86SQ0	Pleckstrin homology-like domain family B member 2 OS=Homo sapiens GN=PHLDB2 PE=1 SV=2 - [PHLB2_HUMAN]	1	Q86SQ0	S513	Pleckstrin homology-like domain family B member 2 (Protein LL5-beta)	PHLDB2 LL5B																									Reverse	Class I	kDsLPDADLAScGSLSQSSASFFTPR	1	K1(Dimethyl:2H(4)); N-Term(Dimethyl:2H(4)); S3(Phospho); C12(Carbamidomethyl)	87	HCD	27	1	2888.41	3	963.476	17.73	143.72	12342
SFLDSGpYRILGAVAK	1	S(1): 0.0; S(5): 0.0; Y(7): 100.0	433	P18206	Vinculin OS=Homo sapiens GN=VCL PE=1 SV=4 - [VINC_HUMAN]	1	P18206	Y822	Vinculin (Metavinculin)	VCL																									Reverse	Class I	sFLDSGyRILGAVAk	1	N-Term(Dimethyl); Y7(Phospho); K15(Dimethyl)	58	HCD	28	1	1732.9	2	866.956	0.81	150.84	12778
LRKNpSEAGGAGPGPGK	1	S(5): 100.0	433	Q5VZ18	SH2 domain-containing adapter protein E OS=Homo sapiens GN=SHE PE=2 SV=1 - [SHE_HUMAN]	1	Q5VZ18	S69	SH2 domain-containing adapter protein E	SHE																									Reverse	Class I	lRkNsEAGGAGPGPGk	1	N-Term(Dimethyl); K3(Dimethyl); S5(Phospho); K16(Dimethyl)	115	ETD	33	2	1659.86	3	553.957	-0.59	26.19	1951
HTGPNpSPDTANDGFVR	1	T(2): 0.0; S(6): 100.0; T(9): 0.0	433	P31943;P55795	Heterogeneous nuclear ribonucleoprotein H OS=Homo sapiens GN=HNRNPH1 PE=1 SV=4 - [HNRH1_HUMAN]|Heterogeneous nuclear ribonucleoprotein H2 OS=Homo sapiens GN=HNRNPH2 PE=1 SV=1 - [HNRH2_HUMAN]	2	P31943	S104	Heterogeneous nuclear ribonucleoprotein H (hnRNP H) [Cleaved into: Heterogeneous nuclear ribonucleoprotein H, N-terminally processed]	HNRNPH1 HNRPH HNRPH1	P55795	S104	Heterogeneous nuclear ribonucleoprotein H2 (hnRNP H2) (FTP-3) (Heterogeneous nuclear ribonucleoprotein H') (hnRNP H')	HNRNPH2 FTP3 HNRPH2																					Reverse	Class I	hTGPNsPDTANDGFVR	1	N-Term(Dimethyl); S6(Phospho)	88	ETD	29	0	1792.77	3	598.26	0.21	60.92	4337
EQTLpSPTITSGLHNIAR	1	T(3): 0.0; S(5): 100.0; T(7): 0.0; T(9): 0.0; S(10): 0.0	433	O94979	Protein transport protein Sec31A OS=Homo sapiens GN=SEC31A PE=1 SV=3 - [SC31A_HUMAN]	1	O94979	S1163	Protein transport protein Sec31A (ABP125) (ABP130) (SEC31-like protein 1) (SEC31-related protein A) (Web1-like protein)	SEC31A KIAA0905 SEC31L1 HSPC275 HSPC334																									Reverse	Class I	eQTLsPTITSGLHNIAR	1	N-Term(Dimethyl); S5(Phospho)	83	ETD	28	0	1945.98	3	649.331	1.44	125.45	8087
SLAALDALNpTDDENDEEEYEAWK	1	S(1): 0.0; T(10): 100.0; Y(19): 0.0	432	P55081	Microfibrillar-associated protein 1 OS=Homo sapiens GN=MFAP1 PE=1 SV=2 - [MFAP1_HUMAN]	1	P55081	T267	Microfibrillar-associated protein 1	MFAP1																									Reverse	Class I	sLAALDALNtDDENDEEEYEAWk	1	N-Term(Dimethyl:2H(4)); T10(Phospho); K23(Dimethyl:2H(4))	94	HCD	14	0	2785.23	3	929.08	1.58	145.62	11070
SNpSVGIQDAFNDGSDSTFQK	1	S(1): 0.2; S(3): 99.8; S(14): 0.0; S(16): 0.0; T(17): 0.0	431	O14497	AT-rich interactive domain-containing protein 1A OS=Homo sapiens GN=ARID1A PE=1 SV=3 - [ARI1A_HUMAN]	1	O14497	S1184	AT-rich interactive domain-containing protein 1A (ARID domain-containing protein 1A) (B120) (BRG1-associated factor 250) (BAF250) (BRG1-associated factor 250a) (BAF250A) (Osa homolog 1) (hOSA1) (SWI-like protein) (SWI/SNF complex protein p270) (SWI/SNF-related, matrix-associated, actin-dependent regulator of chromatin subfamily F member 1) (hELD)	ARID1A BAF250 BAF250A C1orf4 OSA1 SMARCF1																									Reverse	Class I	sNsVGIQDAFNDGSDSTFQk	1	N-Term(Dimethyl:2H(4)); S3(Phospho); K20(Dimethyl:2H(4))	109	HCD	13	0	2261.02	2	1131.02	1.63	137.2	11053
SLRpSLEEQDQETLR	1	S(1): 0.0; S(4): 100.0; T(12): 0.0	431	P48681	Nestin OS=Homo sapiens GN=NES PE=1 SV=2 - [NEST_HUMAN]	1	P48681	S746	Nestin	NES Nbla00170																									Reverse	Class I	sLRsLEEQDQETLR	1	N-Term(Dimethyl); S4(Phospho)	83	ETD	29	1	1811.85	3	604.623	0.76	106.91	7145
ESDQTLAALLpSPKESSGGEK	1	S(2): 0.0; T(5): 0.0; S(11): 100.0; S(15): 0.0; S(16): 0.0	431	P18583	SON protein OS=Homo sapiens GN=SON PE=1 SV=3 - [SON_HUMAN]	1	P18583	S1697	Protein SON (Bax antagonist selected in saccharomyces 1) (BASS1) (Negative regulatory element-binding protein) (NRE-binding protein) (Protein DBP-5) (SON3)	SON C21orf50 DBP5 KIAA1019 NREBP HSPC310 HSPC312																									Reverse	Class I	eSDQTLAALLsPkESSGGEk	1	N-Term(Dimethyl); S11(Phospho); K13(Dimethyl); K20(Dimethyl)	97	ETD	27	1	2211.06	3	737.691	-9.13	130.42	8341
REPGGWGAGASAPVEDDpSDAETYGEENDEQGNYSK	1	S(11): 0.0; S(18): 100.0; T(22): 0.0; Y(23): 0.0; Y(33): 0.0; S(34): 0.0	430	Q9NQS1	Cell death regulator Aven OS=Homo sapiens GN=AVEN PE=1 SV=1 - [AVEN_HUMAN]	1	Q9NQS1	S94	Cell death regulator Aven	AVEN																									Reverse	Class I	rEPGGWGAGASAPVEDDsDAETYGEENDEQGNYSk	1	N-Term(Dimethyl); S18(Phospho); K35(Dimethyl)	110	HCD	28	1	3823.61	3	1275.21	15.21	117.21	10126
QQFYHpSVQDLSGGSR	1	Y(4): 0.0; S(6): 100.0; S(11): 0.0; S(14): 0.0	430	P10398	A-Raf proto-oncogene serine/threonine-protein kinase OS=Homo sapiens GN=ARAF PE=1 SV=2 - [ARAF_HUMAN]	1	P10398	S157	Serine/threonine-protein kinase A-Raf (EC 2.7.11.1) (Proto-oncogene A-Raf) (Proto-oncogene A-Raf-1) (Proto-oncogene Pks)	ARAF ARAF1 PKS PKS2																									Reverse	Class I	qQFYHsVQDLSGGSR	1	N-Term(Dimethyl); S6(Phospho)	79	ETD	28	0	1816.83	3	606.283	17.69	95.29	7849
KTGSPGpSPGAGGVQSTAK	1	T(2): 0.0; S(4): 0.0; S(7): 100.0; S(15): 0.0; T(16): 0.0	429	O43237	Cytoplasmic dynein 1 light intermediate chain 2 OS=Homo sapiens GN=DYNC1LI2 PE=1 SV=1 - [DC1L2_HUMAN]	1	O43237	S446	Cytoplasmic dynein 1 light intermediate chain 2 (Dynein light intermediate chain 2, cytosolic) (LIC-2) (LIC53/55)	DYNC1LI2 DNCLI2 LIC2																									Reverse	Class I	kTGSPGsPGAGGVQSTAk	1	N-Term(Dimethyl); K1(Dimethyl); S7(Phospho); K18(Dimethyl)	85	ETD	28	1	1750.87	3	584.295	-1.62	30.11	2250
RAAVGQEpSPGGLEAGNAK	1	S(8): 100.0	429	Q29RF7	Sister chromatid cohesion protein PDS5 homolog A OS=Homo sapiens GN=PDS5A PE=1 SV=1 - [PDS5A_HUMAN]	1	Q29RF7	S1305	Sister chromatid cohesion protein PDS5 homolog A (Cell proliferation-inducing gene 54 protein) (Sister chromatid cohesion protein 112) (SCC-112)	PDS5A KIAA0648 PDS5 PIG54																									Reverse	Class I	rAAVGQEsPGGLEAGNAk	1	N-Term(Dimethyl:2H(4)); S8(Phospho); K18(Dimethyl:2H(4))	124	ETD	29	1	1855.94	3	619.32	-3.61	50.71	3272
ILEQQNSSRpTLEK	1	S(7): 0.0; S(8): 0.0; T(10): 100.0	429	Q16181	Septin-7 OS=Homo sapiens GN=SEPT7 PE=1 SV=2 - [SEPT7_HUMAN]	1	Q16181	T426	Septin-7 (CDC10 protein homolog)	SEPT7 CDC10																									Reverse	Class I	iLEQQNSSRtLEk	1	N-Term(Dimethyl); T10(Phospho); K13(Dimethyl)	85	ETD	28	1	1681.85	3	561.288	-1.75	45.83	3308
IYHLPDAEpSDEDEDFK	1	Y(2): 0.0; S(9): 100.0	429	Q15019	Septin-2 OS=Homo sapiens GN=SEPT2 PE=1 SV=1 - [SEPT2_HUMAN]	1	Q15019	S218	Septin-2 (Neural precursor cell expressed developmentally down-regulated protein 5) (NEDD-5)	SEPT2 DIFF6 KIAA0158 NEDD5																									Reverse	Class I	iYHLPDAEsDEDEDFk	1	N-Term(Dimethyl:2H(4)); S9(Phospho); K16(Dimethyl:2H(4))	80	ETD	28	0	2066.9	3	689.639	-2.76	119.28	7861
GSNSGMDpSNIDLTIVEDEEEESVALEQAQK	1	S(2): 0.0; S(4): 0.0; S(8): 100.0; T(13): 0.0; S(22): 0.0	428	O95810	Serum deprivation-response protein OS=Homo sapiens GN=SDPR PE=1 SV=3 - [SDPR_HUMAN]	1	O95810	S370	Serum deprivation-response protein (Cavin-2) (PS-p68) (Phosphatidylserine-binding protein)	SDPR																									Reverse	Class I	gSNSGMDsNIDLTIVEDEEEESVALEQAQk	1	N-Term(Dimethyl); S8(Phospho); K30(Dimethyl)	82	HCD	13	0	3373.49	3	1125.17	-0.52	147.64	10815
RKEpSSNTDSAGALGTLR	1	S(4): 100.0; S(5): 0.0; T(7): 0.0; S(9): 0.0; T(15): 0.0	427	P29474	Nitric oxide synthase, endothelial OS=Homo sapiens GN=NOS3 PE=1 SV=3 - [NOS3_HUMAN]	1	P29474	S633	Nitric oxide synthase, endothelial (EC 1.14.13.39) (Constitutive NOS) (cNOS) (EC-NOS) (Endothelial NOS) (eNOS) (NOS type III) (NOSIII)	NOS3																									Reverse	Class I	rkEsSNTDSAGALGTLR	1	N-Term(Dimethyl:2H(4)); K2(Dimethyl:2H(4)); S4(Phospho)	117	ETD	33	2	1906.99	3	636.334	1.4	67.61	4300
ASTIFLSKpSQTDVR	1	S(2): 0.0; T(3): 0.0; S(7): 0.0; S(9): 100.0; T(11): 0.0	427	Q8ND76;Q8N7R7	Cyclin-Y OS=Homo sapiens GN=CCNY PE=1 SV=2 - [CCNY_HUMAN]|Cyclin-Y-like protein 1 OS=Homo sapiens GN=CCNYL1 PE=1 SV=2 - [CCYL1_HUMAN]	2	Q8ND76	S73	Cyclin-Y (Cyc-Y) (Cyclin box protein 1) (Cyclin fold protein 1) (cyclin-X)	CCNY C10orf9 CBCP1 CFP1	Q8N7R7	S95	Cyclin-Y-like protein 1	CCNYL1																					Reverse	Class I	aSTIFLSksQTDVR	1	N-Term(Dimethyl:2H(4)); K8(Dimethyl:2H(4)); S9(Phospho)	102	ETD	28	1	1696.91	3	566.308	-2.49	102.95	6917
IHAESLLLDpSPAVAK	1	S(5): 0.0; S(10): 100.0	427	Q9H4L5	Oxysterol-binding protein-related protein 3 OS=Homo sapiens GN=OSBPL3 PE=1 SV=1 - [OSBL3_HUMAN]	1	Q9H4L5	S410	Oxysterol-binding protein-related protein 3 (ORP-3) (OSBP-related protein 3)	OSBPL3 KIAA0704 ORP3 OSBP3																									Reverse	Class I	iHAESLLLDsPAVAk	1	N-Term(Dimethyl); S10(Phospho); K15(Dimethyl)	121	ETD	29	0	1699.9	3	567.306	0.91	121.84	8020
VNFSEEGEpTEEDDQDSSHSSVTTVK	1	S(4): 0.0; T(9): 100.0; S(16): 0.0; S(17): 0.0; S(19): 0.0; S(20): 0.0; T(22): 0.0; T(23): 0.0	427	Q5JTV8	Torsin-1A-interacting protein 1 OS=Homo sapiens GN=TOR1AIP1 PE=1 SV=2 - [TOIP1_HUMAN]	1	Q5JTV8	T220	Torsin-1A-interacting protein 1 (Lamin-associated protein 1B) (LAP1B)	TOR1AIP1																									Reverse	Class I	vNFSEEGEtEEDDQDSSHSSVTTVk	1	N-Term(Dimethyl:2H(4)); T9(Phospho); K25(Dimethyl:2H(4))	121	HCD	27	0	2900.29	2	1450.65	15.19	100.24	8219
VQAMQISpSEKEEDDNEK	1	S(7): 0.0; S(8): 100.0	426	Q9UKY7	Protein CDV3 homolog OS=Homo sapiens GN=CDV3 PE=1 SV=1 - [CDV3_HUMAN]	1	Q9UKY7	S107	Protein CDV3 homolog	CDV3 H41																									Reverse	Class I	vQAmQISsEkEEDDNEk	1	N-Term(Dimethyl:2H(4)); M4(Oxidation); S8(Phospho); K10(Dimethyl:2H(4)); K17(Dimethyl:2H(4))	96	ETD	27	1	2172.02	3	724.677	-0.42	38.53	2661
AAGALGSASSGpSMPNLAAR	1	S(7): 0.0; S(9): 0.0; S(10): 0.0; S(12): 100.0	426	Q9P2Q2	FERM domain-containing protein 4A OS=Homo sapiens GN=FRMD4A PE=2 SV=3 - [FRM4A_HUMAN]	1	Q9P2Q2	S800	FERM domain-containing protein 4A	FRMD4A FRMD4 KIAA1294																									Reverse	Class I	aAGALGSASSGsMPNLAAR	1	N-Term(Dimethyl); S12(Phospho)	121	ETD	14	0	1796.84	3	599.617	0.87	106.25	8126
QGpSPDQVSPVSEMTSTSLYQDK	1	S(3): 100.0; S(8): 0.0; S(11): 0.0; T(14): 0.0; S(15): 0.0; T(16): 0.0; S(17): 0.0; Y(19): 0.0	426	P46821	Microtubule-associated protein 1B OS=Homo sapiens GN=MAP1B PE=1 SV=1 - [MAP1B_HUMAN]	1	P46821	S1438	Microtubule-associated protein 1B (MAP-1B) [Cleaved into: MAP1 light chain LC1]	MAP1B																									Reverse	Class I	qGsPDQVSPVSEMTSTSLYQDk	1	N-Term(Dimethyl:2H(4)); S3(Phospho); K22(Dimethyl:2H(4))	84	HCD	13	0	2528.17	3	843.395	-0.59	136.38	9943
QEDVGFRGNpSPEMR	1	S(10): 100.0	425	Q9P266	Uncharacterized protein KIAA1462 OS=Homo sapiens GN=KIAA1462 PE=2 SV=3 - [K1462_HUMAN]	1	Q9P266	S885	Junctional protein associated with coronary artery disease (JCAD)	KIAA1462 JCAD																									Reverse	Class I	qEDVGFRGNsPEmR	1	N-Term(Dimethyl); S10(Phospho); M13(Oxidation)	78	ETD	29	1	1745.73	3	582.582	-0.53	51.48	3679
DIKFDDpSDTEQIAEEGDDNLANSASPSK	1	S(7): 100.0; T(9): 0.0; S(23): 0.0; S(25): 0.0; S(27): 0.0	425	Q9Y2I7	FYVE finger-containing phosphoinositide kinase OS=Homo sapiens GN=PIP5K3 PE=1 SV=2 - [FYV1_HUMAN]	1	Q9Y2I7	S475	1-phosphatidylinositol 3-phosphate 5-kinase (Phosphatidylinositol 3-phosphate 5-kinase) (EC 2.7.1.150) (FYVE finger-containing phosphoinositide kinase) (PIKfyve) (Phosphatidylinositol 3-phosphate 5-kinase type III) (PIPkin-III) (Type III PIP kinase)	PIKFYVE KIAA0981 PIP5K3																									Reverse	Class I	dIkFDDsDTEQIAEEGDDNLANSASPSk	2	N-Term(Dimethyl); K3(Dimethyl); S7(Phospho); K28(Dimethyl)	87	HCD	21-24	1	3175.38	3	1059.13	-0.38	83.67	5652
GFGDGYNGYGGGPGGGNFGGpSPGYGGGR	1	Y(6): 0.0; Y(9): 0.0; S(21): 100.0; Y(24): 0.0	425	P22626	Heterogeneous nuclear ribonucleoproteins A2/B1 OS=Homo sapiens GN=HNRNPA2B1 PE=1 SV=2 - [ROA2_HUMAN]	1	P22626	S259	Heterogeneous nuclear ribonucleoproteins A2/B1 (hnRNP A2/B1)	HNRNPA2B1 HNRPA2B1																									Reverse	Class I	gFGDGYNGYGGGPGGGNFGGsPGYGGGR	1	N-Term(Dimethyl:2H(4)); S21(Phospho)	107	HCD	14	0	2607.06	3	869.693	0.71	123.56	9329
SSSNDpSVDEETAESDTSPVLEK	1	S(1): 0.0; S(2): 0.0; S(3): 0.0; S(6): 100.0; T(11): 0.0; S(14): 0.0; T(16): 0.0; S(17): 0.0	424	Q99590	SFRS2-interacting protein OS=Homo sapiens GN=SFRS2IP PE=1 SV=1 - [SFRIP_HUMAN]	1	Q99590	S90	Protein SCAF11 (CTD-associated SR protein 11) (Renal carcinoma antigen NY-REN-40) (SC35-interacting protein 1) (SR-related and CTD-associated factor 11) (SRSF2-interacting protein) (Serine/arginine-rich splicing factor 2-interacting protein) (Splicing factor, arginine/serine-rich 2-interacting protein) (Splicing regulatory protein 129) (SRrp129)	SCAF11 CASP11 SFRS2IP SIP1 SRSF2IP																									Reverse	Class I	sSSNDsVDEETAESDTSPVLEk	1	N-Term(Dimethyl:2H(4)); S6(Phospho); K22(Dimethyl:2H(4))	142	HCD	13	0	2470.09	2	1235.55	1.7	98.64	7836
DRApSPAAAEEVVPEWASCLK	1	S(4): 100.0; S(17): 0.0	423	Q8N3V7	Synaptopodin OS=Homo sapiens GN=SYNPO PE=1 SV=2 - [SYNPO_HUMAN]	1	Q8N3V7	S685	Synaptopodin	SYNPO KIAA1029																									Reverse	Class I	dRAsPAAAEEVVPEWAScLk	1	N-Term(Dimethyl:2H(4)); S4(Phospho); C18(Carbamidomethyl); K20(Dimethyl:2H(4))	72	HCD	27	1	2330.14	2	1165.57	1.44	144.9	12457
LFIIRGpSPQQIDHAK	1	S(7): 100.0	423	Q92945	Far upstream element-binding protein 2 OS=Homo sapiens GN=KHSRP PE=1 SV=3 - [FUBP2_HUMAN]	1	Q92945	S480	Far upstream element-binding protein 2 (FUSE-binding protein 2) (KH type-splicing regulatory protein) (KSRP) (p75)	KHSRP FUBP2																									Reverse	Class I	lFIIRGsPQQIDHAk	1	N-Term(Dimethyl:2H(4)); S7(Phospho); K15(Dimethyl:2H(4))	73	ETD	31	1	1867.04	3	623.019	-1.25	100.69	5675
ETEpSEAEDNLDDLEK	1	T(2): 0.0; S(4): 100.0	423	Q8IYB3	Serine/arginine repetitive matrix protein 1 OS=Homo sapiens GN=SRRM1 PE=1 SV=2 - [SRRM1_HUMAN]	1	Q8IYB3	S874	Serine/arginine repetitive matrix protein 1 (SR-related nuclear matrix protein of 160 kDa) (SRm160) (Ser/Arg-related nuclear matrix protein)	SRRM1 SRM160																									Reverse	Class I	eTEsEAEDNLDDLEk	1	N-Term(Dimethyl); S4(Phospho); K15(Dimethyl)	99	ETD	12	0	1872.76	3	624.926	0.21	80.16	6122
SRpSDNALNLVTER	1	S(1): 0.0; S(3): 100.0; T(11): 0.0	423	Q96MT3	Prickle-like protein 1 OS=Homo sapiens GN=PRICKLE1 PE=1 SV=2 - [PRIC1_HUMAN]	1	Q96MT3	S683	Prickle-like protein 1 (REST/NRSF-interacting LIM domain protein 1)	PRICKLE1 RILP																									Reverse	Class I	sRsDNALNLVTER	1	N-Term(Dimethyl); S3(Phospho)	87	ETD	29	1	1582.76	3	528.257	-0.71	103.2	6936
ASLGSLEGEAEAEASpSPK	1	S(2): 0.0; S(5): 0.0; S(15): 0.0; S(16): 100.0	423	Q09666	Neuroblast differentiation-associated protein AHNAK OS=Homo sapiens GN=AHNAK PE=1 SV=2 - [AHNK_HUMAN]	1	Q09666	S5763	Neuroblast differentiation-associated protein AHNAK (Desmoyokin)	AHNAK PM227																									Reverse	Class I	aSLGSLEGEAEAEASsPk	1	N-Term(Dimethyl); S16(Phospho); K18(Dimethyl)	99	ETD	14	0	1868.85	3	623.623	0.28	127.08	9576
KPATPAEDDEDDDIDLFGpSDNEEEDK	1	T(4): 0.0; S(19): 100.0	422	P29692	Elongation factor 1-delta OS=Homo sapiens GN=EEF1D PE=1 SV=5 - [EF1D_HUMAN]	1	P29692	S162	Elongation factor 1-delta (EF-1-delta) (Antigen NY-CO-4)	EEF1D EF1D																									Reverse	Class I	kPATPAEDDEDDDIDLFGsDNEEEDk	1	N-Term(Dimethyl); K1(Dimethyl); S19(Phospho); K26(Dimethyl)	72	HCD	27	0	3073.26	3	1025.09	0.63	134.87	11448
GRWEpSQQDVSQTTVSR	1	S(5): 100.0; S(10): 0.0; T(12): 0.0; T(13): 0.0; S(15): 0.0	422	Q9NQT8	Kinesin-like protein KIF13B OS=Homo sapiens GN=KIF13B PE=1 SV=1 - [KI13B_HUMAN]	1	Q9NQT8	S1410	Kinesin-like protein KIF13B (Kinesin-like protein GAKIN)	KIF13B GAKIN KIAA0639																									Reverse	Class I	gRWEsQQDVSQTTVSR	1	N-Term(Dimethyl:2H(4)); S5(Phospho)	93	ETD	29	1	1975.92	3	659.31	-0.7	61.88	3905
REESPMDVDQPpSPSAQDTQSIASDGTPQGEK	1	S(4): 0.0; S(12): 100.0; S(14): 0.0; T(18): 0.0; S(20): 0.0; S(23): 0.0; T(26): 0.0	422	Q7Z6Z7	E3 ubiquitin-protein ligase HUWE1 OS=Homo sapiens GN=HUWE1 PE=1 SV=3 - [HUWE1_HUMAN]	1	Q7Z6Z7	S3816	E3 ubiquitin-protein ligase HUWE1 (EC 6.3.2.-) (ARF-binding protein 1) (ARF-BP1) (HECT, UBA and WWE domain-containing protein 1) (Homologous to E6AP carboxyl terminus homologous protein 9) (HectH9) (Large structure of UREB1) (LASU1) (Mcl-1 ubiquitin ligase E3) (Mule) (Upstream regulatory element-binding protein 1) (URE-B1) (URE-binding protein 1)	HUWE1 KIAA0312 KIAA1578 UREB1 HSPC272																									Reverse	Class I	rEESPmDVDQPSPsAQDTQSIASDGTPQGEk	1	N-Term(Dimethyl); M6(Oxidation); S14(Phospho); K31(Dimethyl)	89	HCD	28	1	3439.48	3	1147.17	-1.13	72.93	5071
LKFpSDDEEEEEVVK	1	S(4): 100.0	422	Q5JSZ5	Uncharacterized protein KIAA0515 OS=Homo sapiens GN=KIAA0515 PE=1 SV=1 - [K0515_HUMAN]	1	Q5JSZ5	S388	Protein PRRC2B (HLA-B-associated transcript 2-like 1) (Proline-rich coiled-coil protein 2B)	PRRC2B BAT2L BAT2L1 KIAA0515																									Reverse	Class I	lkFsDDEEEEEVVk	1	N-Term(Dimethyl); K2(Dimethyl); S4(Phospho); K14(Dimethyl)	75	ETD	28	1	1859.85	3	620.623	-1.5	109.1	7274
HSVTAApTPPPSPTSGESGDLLSNLLQSPSSAK	1	S(2): 0.0; T(4): 0.0; T(7): 100.0; S(11): 0.0; T(13): 0.0; S(14): 0.0; S(17): 0.0; S(22): 0.0; S(27): 0.0; S(29): 0.0; S(30): 0.0	421	Q96QU8	Exportin-6 OS=Homo sapiens GN=XPO6 PE=1 SV=1 - [XPO6_HUMAN]	1	Q96QU8	T204	Exportin-6 (Exp6) (Ran-binding protein 20)	XPO6 KIAA0370 RANBP20																									Reverse	Class I	hSVTAAtPPPSPTSGESGDLLSNLLQSPSSAk	1	N-Term(Dimethyl); T7(Phospho); K32(Dimethyl)	68	HCD	27	0	3269.6	3	1090.54	1.12	146.63	12616
RKApSPEPPDSAEGALK	1	S(4): 100.0; S(10): 0.0	421	Q9H1B7	Enhanced at puberty protein 1 OS=Homo sapiens GN=EAP1 PE=1 SV=1 - [EAP1_HUMAN]	1	Q9H1B7	S547	Interferon regulatory factor 2-binding protein-like (Enhanced at puberty protein 1)	IRF2BPL C14orf4 EAP1 KIAA1865 My039																									Reverse	Class I	rkAsPEPPDSAEGALk	1	N-Term(Dimethyl:2H(4)); K2(Dimethyl:2H(4)); S4(Phospho); K16(Dimethyl:2H(4))	81	ETD	33	2	1829	3	610.337	0.67	53.21	3489
TTKpSPSDSGYSYETIGK	1	T(1): 0.0; T(2): 0.0; S(4): 100.0; S(6): 0.0; S(8): 0.0; Y(10): 0.0; S(11): 0.0; Y(12): 0.0; T(14): 0.0	421	P46821	Microtubule-associated protein 1B OS=Homo sapiens GN=MAP1B PE=1 SV=1 - [MAP1B_HUMAN]	1	P46821	S1915	Microtubule-associated protein 1B (MAP-1B) [Cleaved into: MAP1 light chain LC1]	MAP1B																									Reverse	Class I	tTksPSDSGYSYETIGk	1	N-Term(Dimethyl:2H(4)); K3(Dimethyl:2H(4)); S4(Phospho); K17(Dimethyl:2H(4))	101	ETD	27	1	1996.99	3	666.335	-0.34	80.58	5513
ANpSFVGTAQYVSPELLTEK	1	S(3): 100.0; T(7): 0.0; Y(10): 0.0; S(12): 0.0; T(17): 0.0	420	O15530	3-phosphoinositide-dependent protein kinase 1 OS=Homo sapiens GN=PDPK1 PE=1 SV=1 - [PDPK1_HUMAN]	1	O15530	S241	3-phosphoinositide-dependent protein kinase 1 (hPDK1) (EC 2.7.11.1)	PDPK1 PDK1																									Reverse	Class I	aNsFVGTAQYVSPELLTEk	1	N-Term(Dimethyl:2H(4)); S3(Phospho); K19(Dimethyl:2H(4))	86	HCD	13	0	2198.13	2	1099.57	1.36	144.87	11749
VEMYpSGpSDDDDDFNK	2	Y(4): 0.0; S(5): 100.0; S(7): 100.0	420	O60841	Eukaryotic translation initiation factor 5B OS=Homo sapiens GN=EIF5B PE=1 SV=3 - [IF2P_HUMAN]	1	O60841	S135, S137	Eukaryotic translation initiation factor 5B (eIF-5B) (Translation initiation factor IF-2)	EIF5B IF2 KIAA0741																									Reverse	Class I	vEmYsGsDDDDDFNk	1	N-Term(Dimethyl); M3(Oxidation); S5(Phospho); S7(Phospho); K15(Dimethyl)	74	ETD	7	0	1968.65	3	656.888	0.55	55.14	3848
DTSATSQSVNGpSPQAEQPSLESTSK	1	T(2): 0.0; S(3): 0.0; T(5): 0.0; S(6): 0.0; S(8): 0.0; S(12): 100.0; S(19): 0.0; S(22): 0.0; T(23): 0.0; S(24): 0.0	420	Q86WB0	Nuclear-interacting partner of ALK OS=Homo sapiens GN=ZC3HC1 PE=1 SV=1 - [NIPA_HUMAN]	1	Q86WB0	S62	Nuclear-interacting partner of ALK (Nuclear-interacting partner of anaplastic lymphoma kinase) (hNIPA) (Zinc finger C3HC-type protein 1)	ZC3HC1 NIPA HSPC216																									Reverse	Class I	dTSATSQSVNGsPQAEQPSLESTSk	1	N-Term(Dimethyl:2H(4)); S12(Phospho); K25(Dimethyl:2H(4))	91	HCD	13	0	2680.25	3	894.087	1.18	68.22	4967
SVKHDSIPAADTFEDLpSDVEGGGSEPTQR	1	S(1): 0.0; S(6): 0.0; T(12): 0.0; S(17): 100.0; S(24): 0.0; T(27): 0.0	419	O95671	N-acetylserotonin O-methyltransferase-like protein OS=Homo sapiens GN=ASMTL PE=1 SV=3 - [ASML_HUMAN]	1	O95671	S239	N-acetylserotonin O-methyltransferase-like protein (ASMTL)	ASMTL																									Reverse	Class I	sVkHDSIPAADTFEDLsDVEGGGSEPTQR	1	N-Term(Dimethyl); K3(Dimethyl); S17(Phospho)	88	HCD	32	1	3180.44	3	1060.82	0.41	120.94	7035
RSYpSLSELSVLQAK	1	S(2): 0.0; Y(3): 0.0; S(4): 100.0; S(6): 0.0; S(9): 0.0	419	Q9P0V3	SH3 domain-binding protein 4 OS=Homo sapiens GN=SH3BP4 PE=1 SV=1 - [SH3B4_HUMAN]	1	Q9P0V3	S246	SH3 domain-binding protein 4 (EH-binding protein 10) (Transferrin receptor-trafficking protein)	SH3BP4 BOG25 EHB10 TTP																									Reverse	Class I	rSYsLSELSVLQAk	1	N-Term(Dimethyl); S4(Phospho); K14(Dimethyl)	78	ETD	28	1	1716.89	3	572.969	-0.89	137.19	8889
SHSESASPSALSSpSPNNLSPTGWSQPK	1	S(1): 0.0; S(3): 0.0; S(5): 0.0; S(7): 0.0; S(9): 0.0; S(12): 0.0; S(13): 0.7; S(14): 99.3; S(19): 0.0; T(21): 0.0; S(24): 0.0	419	P04049	RAF proto-oncogene serine/threonine-protein kinase OS=Homo sapiens GN=RAF1 PE=1 SV=1 - [RAF1_HUMAN]	1	P04049	S296	RAF proto-oncogene serine/threonine-protein kinase (EC 2.7.11.1) (Proto-oncogene c-RAF) (cRaf) (Raf-1)	RAF1 RAF																									Reverse	Class I	sHSESASPSALSSsPNNLSPTGWSQPk	1	N-Term(Dimethyl); S14(Phospho); K27(Dimethyl)	78	HCD	30	0	2876.31	3	959.442	0.93	118.61	9780
EGHSLEMENENLVENGADpSDEDDNSFLK	1	S(4): 0.0; S(19): 100.0; S(25): 0.0	418	Q9UHB6	LIM domain and actin-binding protein 1 OS=Homo sapiens GN=LIMA1 PE=1 SV=1 - [LIMA1_HUMAN]	1	Q9UHB6	S686	LIM domain and actin-binding protein 1 (Epithelial protein lost in neoplasm)	LIMA1 EPLIN SREBP3 PP624																									Reverse	Class I	eGHSLEmENENLVENGADsDEDDNSFLk	1	N-Term(Dimethyl:2H(4)); M7(Oxidation); S19(Phospho); K28(Dimethyl:2H(4))	112	HCD	28	0	3297.39	3	1099.8	1.8	129.69	10963
KEESEEpSDDDMGFGLFD	1	S(4): 0.0; S(7): 100.0	418	P05386;P05387	60S acidic ribosomal protein P1 OS=Homo sapiens GN=RPLP1 PE=1 SV=1 - [RLA1_HUMAN]|60S acidic ribosomal protein P2 OS=Homo sapiens GN=RPLP2 PE=1 SV=1 - [RLA2_HUMAN]	2	P05386	S104	60S acidic ribosomal protein P1	RPLP1 RRP1	P05387	S105	60S acidic ribosomal protein P2 (Renal carcinoma antigen NY-REN-44)	RPLP2 D11S2243E RPP2																					Reverse	Class I	kEESEEsDDDMGFGLFD	1	N-Term(Dimethyl:2H(4)); K1(Dimethyl:2H(4)); S7(Phospho)	95	ETD	14	1	2093.84	3	698.619	1.7	149.43	11371
GLFpSDEEDSEDLFSSQSASK	1	S(4): 100.0; S(9): 0.0; S(14): 0.0; S(15): 0.0; S(17): 0.0; S(19): 0.0	418	Q641Q2;Q5SNT6	Protein FAM21A OS=Homo sapiens GN=FAM21A PE=1 SV=3 - [FA21A_HUMAN]|Protein FAM21B OS=Homo sapiens GN=FAM21B PE=1 SV=2 - [FA21B_HUMAN]	2	Q641Q2	S539	WASH complex subunit FAM21A	FAM21A	Q5SNT6	S451	WASH complex subunit FAM21B	FAM21B																					Reverse	Class I	gLFsDEEDSEDLFSSQSASk	1	N-Term(Dimethyl); S4(Phospho); K20(Dimethyl)	118	HCD	13	0	2313.97	2	1157.49	1.66	147.61	12000
QVAEQGGDLpSPAANR	1	S(10): 100.0	418	O94804	Serine/threonine-protein kinase 10 OS=Homo sapiens GN=STK10 PE=1 SV=1 - [STK10_HUMAN]	1	O94804	S438	Serine/threonine-protein kinase 10 (EC 2.7.11.1) (Lymphocyte-oriented kinase)	STK10 LOK																									Reverse	Class I	qVAEQGGDLsPAANR	1	N-Term(Dimethyl); S10(Phospho)	98	ETD	14	0	1620.74	3	540.918	0.83	51.77	3758
KLGDVpSPTQIDVSQFGSFK	1	S(6): 100.0; T(8): 0.0; S(13): 0.0; S(17): 0.0	418	P46821	Microtubule-associated protein 1B OS=Homo sapiens GN=MAP1B PE=1 SV=1 - [MAP1B_HUMAN]	1	P46821	S1501	Microtubule-associated protein 1B (MAP-1B) [Cleaved into: MAP1 light chain LC1]	MAP1B																									Reverse	Class I	kLGDVsPTQIDVSQFGSFk	1	N-Term(Dimethyl); K1(Dimethyl); S6(Phospho); K19(Dimethyl)	84	ETD	28	1	2217.11	3	739.709	-3.18	140.6	9127
GTGQpSDDSDIWDDTALIK	1	T(2): 0.0; S(5): 100.0; S(8): 0.0; T(14): 0.0	417	Q16637	Survival motor neuron protein OS=Homo sapiens GN=SMN1 PE=1 SV=1 - [SMN_HUMAN]	1	Q16637	S28	Survival motor neuron protein (Component of gems 1) (Gemin-1)	SMN1 SMN SMNT; SMN2 SMNC																									Reverse	Class I	gTGQsDDSDIWDDTALIk	1	N-Term(Dimethyl); S5(Phospho); K18(Dimethyl)	95	ETD	13	0	2072.91	3	691.641	0.86	144.94	10617
IEDVGpSDEEDDSGKDKK	1	S(6): 100.0; S(12): 0.0	417	Q58FF8;P08238	Putative heat shock protein HSP 90-beta 2 OS=Homo sapiens GN=HSP90AB2P PE=1 SV=2 - [H90B2_HUMAN]|Heat shock protein HSP 90-beta OS=Homo sapiens GN=HSP90AB1 PE=1 SV=4 - [HS90B_HUMAN]	2	Q58FF8	S177	Putative heat shock protein HSP 90-beta 2 (Heat shock protein 90-beta b) (Heat shock protein 90Bb)	HSP90AB2P HSP90BB	P08238	S255	Heat shock protein HSP 90-beta (HSP 90) (Heat shock 84 kDa) (HSP 84) (HSP84)	HSP90AB1 HSP90B HSPC2 HSPCB																					Reverse	Class I	iEDVGsDEEDDSGkDkk	1	N-Term(Dimethyl); S6(Phospho); K14(Dimethyl); K16(Dimethyl); K17(Dimethyl)	84	ETD	31	2	2057.91	3	686.642	-2.77	33.91	2214
AEEEHLSSpSGGLAK	1	S(7): 0.0; S(8): 0.0; S(9): 100.0	417	Q52LW3	Rho GTPase-activating protein 29 OS=Homo sapiens GN=ARHGAP29 PE=1 SV=2 - [RHG29_HUMAN]	1	Q52LW3	S357	Rho GTPase-activating protein 29 (PTPL1-associated RhoGAP protein 1) (Rho-type GTPase-activating protein 29)	ARHGAP29 PARG1																									Reverse	Class I	aEEEHLSSsGGLAk	1	N-Term(Dimethyl); S9(Phospho); K14(Dimethyl)	94	ETD	28	0	1550.71	3	517.575	-0.31	52.19	3743
EKTEpSELKFEEDER	1	T(3): 0.0; S(5): 100.0	417	O94854	Uncharacterized protein KIAA0754 OS=Homo sapiens GN=KIAA0754 PE=1 SV=3 - [K0754_HUMAN]	1	O94854	S181	Uncharacterized protein KIAA0754	KIAA0754																									Reverse	Class I	ekTEsELkFEEDER	1	N-Term(Dimethyl); K2(Dimethyl); S5(Phospho); K8(Dimethyl)	62	ETD	32	2	1932.88	3	644.966	0.44	64.59	4136
EVIDApSDKEGMpSPAK	2	S(6): 100.0; S(12): 100.0	417	Q13523	Serine/threonine-protein kinase PRP4 homolog OS=Homo sapiens GN=PRPF4B PE=1 SV=2 - [PRP4B_HUMAN]	1	Q13523	S87, S93	Serine/threonine-protein kinase PRP4 homolog (EC 2.7.11.1) (PRP4 kinase) (PRP4 pre-mRNA-processing factor 4 homolog)	PRPF4B KIAA0536 PRP4 PRP4H PRP4K																									Reverse	Class I	eVIDAsDkEGMsPAk	1	N-Term(Dimethyl); S6(Phospho); K8(Dimethyl); S12(Phospho); K15(Dimethyl)	70	ETD	14	1	1820.78	3	607.597	-2.12	67.51	5069
GLFpSDEEDSEDLFSSQSASNLK	1	S(4): 100.0; S(9): 0.0; S(14): 0.0; S(15): 0.0; S(17): 0.0; S(19): 0.0	417	Q9Y4E1	Protein FAM21C OS=Homo sapiens GN=FAM21C PE=1 SV=2 - [FA21C_HUMAN]	1	Q9Y4E1	S539	WASH complex subunit FAM21C (Vaccinia virus penetration factor) (VPEF)	FAM21C KIAA0592																									Reverse	Class I	gLFsDEEDSEDLFSSQSASNLk	1	N-Term(Dimethyl); S4(Phospho); K22(Dimethyl)	105	HCD	12	0	2541.09	2	1271.05	0.43	92.04	7152
RPMEEDGEEKpSPSK	1	S(11): 100.0; S(13): 0.0	416	Q12906	Interleukin enhancer-binding factor 3 OS=Homo sapiens GN=ILF3 PE=1 SV=3 - [ILF3_HUMAN]	1	Q12906	S382	Interleukin enhancer-binding factor 3 (Double-stranded RNA-binding protein 76) (DRBP76) (M-phase phosphoprotein 4) (MPP4) (Nuclear factor associated with dsRNA) (NFAR) (Nuclear factor of activated T-cells 90 kDa) (NF-AT-90) (Translational control protein 80) (TCP80)	ILF3 DRBF MPHOSPH4 NF90																									Reverse	Class I	rPmEEDGEEksPSk	1	N-Term(Dimethyl); M3(Oxidation); K10(Dimethyl); S11(Phospho); K14(Dimethyl)	69	ETD	33	1	1798.79	3	600.27	0.7	27.69	1929
HGSGPNIILTGDSpSPGFSK	1	S(3): 0.0; T(10): 0.0; S(13): 0.0; S(14): 100.0; S(18): 0.0	416	Q53ET0	CREB-regulated transcription coactivator 2 OS=Homo sapiens GN=CRTC2 PE=1 SV=2 - [CRTC2_HUMAN]	1	Q53ET0	S624	CREB-regulated transcription coactivator 2 (Transducer of regulated cAMP response element-binding protein 2) (TORC-2) (Transducer of CREB protein 2)	CRTC2 TORC2																									Reverse	Class I	hGSGPNIILTGDSsPGFSk	1	N-Term(Dimethyl); S14(Phospho); K19(Dimethyl)	104	ETD	29	0	2006.96	3	669.658	0.93	112.64	7482
NRPTpSISWDGLDSGK	1	T(4): 0.0; S(5): 100.0; S(7): 0.0; S(13): 0.0	416	P30086	Phosphatidylethanolamine-binding protein 1 OS=Homo sapiens GN=PEBP1 PE=1 SV=3 - [PEBP1_HUMAN]	1	P30086	S52	Phosphatidylethanolamine-binding protein 1 (PEBP-1) (HCNPpp) (Neuropolypeptide h3) (Prostatic-binding protein) (Raf kinase inhibitor protein) (RKIP) [Cleaved into: Hippocampal cholinergic neurostimulating peptide (HCNP)]	PEBP1 PBP PEBP																									Reverse	Class I	nRPTsISWDGLDSGk	1	N-Term(Dimethyl:2H(4)); S5(Phospho); K15(Dimethyl:2H(4))	106	ETD	28	0	1776.86	3	592.958	-9.78	119.87	7813
KLEGNSPQGpSNQGVK	1	S(6): 0.0; S(10): 100.0	415	P61006	Ras-related protein Rab-8A OS=Homo sapiens GN=RAB8A PE=1 SV=1 - [RAB8A_HUMAN]	1	P61006	S185	Ras-related protein Rab-8A (Oncogene c-mel)	RAB8A MEL RAB8																									Reverse	Class I	kLEGNSPQGsNQGVk	1	N-Term(Dimethyl); K1(Dimethyl); S10(Phospho); K15(Dimethyl)	77	ETD	29	1	1706.85	3	569.621	0.37	30.8	2294
SHWDDSTpSDSELEK	1	S(1): 0.0; S(6): 0.0; T(7): 0.0; S(8): 100.0; S(10): 0.0	415	P78559	Microtubule-associated protein 1A OS=Homo sapiens GN=MAP1A PE=1 SV=5 - [MAP1A_HUMAN]	1	P78559	S2106	Microtubule-associated protein 1A (MAP-1A) (Proliferation-related protein p80) [Cleaved into: MAP1 light chain LC2]	MAP1A MAP1L																									Reverse	Class I	sHWDDSTsDSELEk	1	N-Term(Dimethyl); S8(Phospho); K14(Dimethyl)	81	ETD	29	0	1771.7	3	591.24	-0.58	68.61	4266
GSAPHSESDLPEQEEEILGpSDDDEQEDPNDYCK	1	S(2): 0.0; S(6): 0.0; S(8): 0.0; S(20): 100.0; Y(31): 0.0	414	Q96SB4	Serine/threonine-protein kinase SRPK1 OS=Homo sapiens GN=SRPK1 PE=1 SV=1 - [SRPK1_HUMAN]	1	Q96SB4	S222	SRSF protein kinase 1 (EC 2.7.11.1) (SFRS protein kinase 1) (Serine/arginine-rich protein-specific kinase 1) (SR-protein-specific kinase 1)	SRPK1																									Reverse	Class I	gSAPHSESDLPEQEEEILGsDDDEQEDPNDYck	1	N-Term(Dimethyl:2H(4)); S20(Phospho); C32(Carbamidomethyl); K33(Dimethyl:2H(4))	79	HCD	27	0	3878.59	3	1293.54	2.09	125.7	10637
TpSDANETEDHLESLICK	1	T(1): 2.6; S(2): 97.4; T(7): 0.0; S(13): 0.0	414	Q09161	Nuclear cap-binding protein subunit 1 OS=Homo sapiens GN=NCBP1 PE=1 SV=1 - [NCBP1_HUMAN]	1	Q09161	S22	Nuclear cap-binding protein subunit 1 (80 kDa nuclear cap-binding protein) (CBP80) (NCBP 80 kDa subunit)	NCBP1 CBP80 NCBP																									Reverse	Class I	tsDANETEDHLESLIck	1	N-Term(Dimethyl:2H(4)); S2(Phospho); C16(Carbamidomethyl); K17(Dimethyl:2H(4))	89	ETD	27	0	2105.97	3	702.66	5.32	139.58	11921
SQSSDTEQQpSPTSGGGK	1	S(1): 0.0; S(3): 0.0; S(4): 0.0; T(6): 0.0; S(10): 100.0; T(12): 0.0; S(13): 0.0	414	P23588	Eukaryotic translation initiation factor 4B OS=Homo sapiens GN=EIF4B PE=1 SV=2 - [IF4B_HUMAN]	1	P23588	S504	Eukaryotic translation initiation factor 4B (eIF-4B)	EIF4B																									Reverse	Class I	sQSSDTEQQsPTSGGGk	1	N-Term(Dimethyl); S10(Phospho); K17(Dimethyl)	97	ETD	14	0	1816.76	3	606.259	0.75	25.48	1900
SSLGQSApSETEEDTVSVSK	1	S(1): 0.0; S(2): 0.0; S(6): 0.0; S(8): 100.0; T(10): 0.0; T(14): 0.0; S(16): 0.0; S(18): 0.0	414	Q13435	Splicing factor 3B subunit 2 OS=Homo sapiens GN=SF3B2 PE=1 SV=1 - [SF3B2_HUMAN]	1	Q13435	S286	Splicing factor 3B subunit 2 (Pre-mRNA-splicing factor SF3b 145 kDa subunit) (SF3b145) (SF3b150) (Spliceosome-associated protein 145) (SAP 145)	SF3B2 SAP145																									Reverse	Class I	sSLGQSAsETEEDTVSVSk	1	N-Term(Dimethyl); S8(Phospho); K19(Dimethyl)	110	ETD	13	0	2076.92	3	692.979	0.52	86.98	6428
NKpSNEDQSMGNWQIK	1	S(3): 100.0; S(8): 0.0	414	P02545	Lamin-A/C OS=Homo sapiens GN=LMNA PE=1 SV=1 - [LMNA_HUMAN]	1	P02545	S458	Prelamin-A/C [Cleaved into: Lamin-A/C (70 kDa lamin) (Renal carcinoma antigen NY-REN-32)]	LMNA LMN1																									Reverse	Class I	nksNEDQSmGNWQIk	1	N-Term(Dimethyl:2H(4)); K2(Dimethyl:2H(4)); S3(Phospho); M9(Oxidation); K15(Dimethyl:2H(4))	90	ETD	28	1	1970.94	3	657.653	0.39	80.61	6493
DMEpSPTKLDVTLAK	1	S(4): 100.0; T(6): 0.0; T(11): 0.0	414	P27816	Microtubule-associated protein 4 OS=Homo sapiens GN=MAP4 PE=1 SV=2 - [MAP4_HUMAN]	1	P27816	S280	Microtubule-associated protein 4 (MAP-4)	MAP4																									Reverse	Class I	dMEsPTkLDVTLAk	2	N-Term(Dimethyl); S4(Phospho); K7(Dimethyl); K14(Dimethyl)	77	ETD	26	1	1711.86	3	571.291	-0.32	121.63	8425
GAEAFGDpSEEDGEDVFEVEK	1	S(8): 100.0	413	Q99549	M-phase phosphoprotein 8 OS=Homo sapiens GN=MPHOSPH8 PE=1 SV=2 - [MPP8_HUMAN]	1	Q99549	S51	M-phase phosphoprotein 8 (Two hybrid-associated protein 3 with RanBPM) (Twa3)	MPHOSPH8 MPP8																									Reverse	Class I	gAEAFGDsEEDGEDVFEVEk	1	N-Term(Dimethyl:2H(4)); S8(Phospho); K20(Dimethyl:2H(4))	68	HCD	13	0	2302.97	3	768.329	0.23	138.09	10074
LTSIGpSDEDEETETYQEK	1	T(2): 0.0; S(3): 0.0; S(6): 100.0; T(12): 0.0; T(14): 0.0; Y(15): 0.0	413	Q9UHW9	Solute carrier family 12 member 6 OS=Homo sapiens GN=SLC12A6 PE=1 SV=2 - [S12A6_HUMAN]	1	Q9UHW9	S1032	Solute carrier family 12 member 6 (Electroneutral potassium-chloride cotransporter 3) (K-Cl cotransporter 3)	SLC12A6 KCC3																									Reverse	Class I	lTSIGsDEDEETETYQEk	1	N-Term(Dimethyl:2H(4)); S6(Phospho); K18(Dimethyl:2H(4))	95	ETD	13	0	2217.98	3	739.998	0.63	91.88	6805
VNSNpSLDLPSSSDTTHASK	1	S(3): 0.0; S(5): 100.0; S(10): 0.0; S(11): 0.0; S(12): 0.0; T(14): 0.0; T(15): 0.0; S(18): 0.0	413	Q8NEY1	Neuron navigator 1 OS=Homo sapiens GN=NAV1 PE=1 SV=2 - [NAV1_HUMAN]	1	Q8NEY1	S808	Neuron navigator 1 (Pore membrane and/or filament-interacting-like protein 3) (Steerin-1) (Unc-53 homolog 1) (unc53H1)	NAV1 KIAA1151 KIAA1213 POMFIL3 STEERIN1																									Reverse	Class I	vNSNsLDLPSSSDTTHASk	1	N-Term(Dimethyl); S5(Phospho); K19(Dimethyl)	116	HCD	27	0	2095.96	2	1048.48	2.67	87	7212
SVSSLSNRSpSPLSWR	1	S(1): 0.0; S(3): 0.0; S(4): 0.0; S(6): 0.0; S(9): 0.0; S(10): 100.0; S(13): 0.0	412	Q8NEY1	Neuron navigator 1 OS=Homo sapiens GN=NAV1 PE=1 SV=2 - [NAV1_HUMAN]	1	Q8NEY1	S312	Neuron navigator 1 (Pore membrane and/or filament-interacting-like protein 3) (Steerin-1) (Unc-53 homolog 1) (unc53H1)	NAV1 KIAA1151 KIAA1213 POMFIL3 STEERIN1																									Reverse	Class I	sVSSLSNRSsPLSWR	1	N-Term(Dimethyl); S10(Phospho)	73	ETD	29	1	1770.86	3	590.957	1.41	107.38	6315
KAEAGAGpSATEFQFR	1	S(8): 100.0; T(10): 0.0	412	P46783	40S ribosomal protein S10 OS=Homo sapiens GN=RPS10 PE=1 SV=1 - [RS10_HUMAN]	1	P46783	S146	40S ribosomal protein S10	RPS10																									Reverse	Class I	kAEAGAGsATEFQFR	1	N-Term(Dimethyl:2H(4)); K1(Dimethyl:2H(4)); S8(Phospho)	100	ETD	29	1	1713.84	3	571.953	-0.22	93.61	6364
RNpTFVGTPFWMAPEVIK	1	T(3): 100.0; T(7): 0.0	412	Q9Y6E0;O00506	Serine/threonine-protein kinase 24 OS=Homo sapiens GN=STK24 PE=1 SV=1 - [STK24_HUMAN]|Serine/threonine-protein kinase 25 OS=Homo sapiens GN=STK25 PE=1 SV=1 - [STK25_HUMAN]	2	Q9Y6E0	T190	Serine/threonine-protein kinase 24 (EC 2.7.11.1) (Mammalian STE20-like protein kinase 3) (MST-3) (STE20-like kinase MST3) [Cleaved into: Serine/threonine-protein kinase 24 36 kDa subunit (Mammalian STE20-like protein kinase 3 N-terminal) (MST3/N); Serine/threonine-protein kinase 24 12 kDa subunit (Mammalian STE20-like protein kinase 3 C-terminal) (MST3/C)]	STK24 MST3 STK3	O00506	T174	Serine/threonine-protein kinase 25 (EC 2.7.11.1) (Ste20-like kinase) (Sterile 20/oxidant stress-response kinase 1) (SOK-1) (Ste20/oxidant stress response kinase 1)	STK25 SOK1 YSK1																					Reverse	Class I	rNtFVGTPFWMAPEVIk	1	N-Term(Dimethyl:2H(4)); T3(Phospho); K17(Dimethyl:2H(4))	87	ETD	28	1	2137.12	3	713.044	0.16	146.99	9339
ATpSNVFAMFDQSQIQEFK	1	T(2): 2.8; S(3): 97.2; S(12): 0.0	411	P19105	Myosin regulatory light chain MRLC3 OS=Homo sapiens GN=MRLC3 PE=1 SV=2 - [MRLC3_HUMAN]	1	P19105	S19	Myosin regulatory light chain 12A (MLC-2B) (Myosin RLC) (Myosin regulatory light chain 2, nonsarcomeric) (Myosin regulatory light chain MRLC3)	MYL12A MLCB MRLC3 RLC																									Reverse	Class I	aTsNVFAMFDQSQIQEFk	1	N-Term(Dimethyl); S3(Phospho); K18(Dimethyl)	79	ETD	13	0	2227.02	3	743.01	0.58	151.1	11048
QITQEEDDpSDEEVAPENFFSLPEK	1	T(3): 0.0; S(9): 100.0; S(20): 0.0	411	Q92733	Proline-rich protein PRCC OS=Homo sapiens GN=PRCC PE=1 SV=1 - [PRCC_HUMAN]	1	Q92733	S267	Proline-rich protein PRCC (Papillary renal cell carcinoma translocation-associated gene protein)	PRCC TPRC																									Reverse	Class I	qITQEEDDsDEEVAPENFFSLPEk	1	N-Term(Dimethyl); S9(Phospho); K24(Dimethyl)	95	HCD	13	0	2932.27	2	1466.64	0.36	150.41	12246
ARLGEApSDSELADADK	1	S(7): 100.0; S(9): 0.0	411	Q5SW79	Centrosomal protein of 170 kDa OS=Homo sapiens GN=CEP170 PE=1 SV=1 - [CE170_HUMAN]	1	Q5SW79	S1112	Centrosomal protein of 170 kDa (Cep170) (KARP-1-binding protein) (KARP1-binding protein)	CEP170 FAM68A KAB KIAA0470																									Reverse	Class I	aRLGEAsDSELADADk	1	N-Term(Dimethyl:2H(4)); S7(Phospho); K16(Dimethyl:2H(4))	97	ETD	28	1	1791.86	3	597.957	-2.13	73.12	5119
WDKDDFEpSEEEDVK	1	S(8): 100.0	411	Q7Z6E9	Retinoblastoma-binding protein 6 OS=Homo sapiens GN=RBBP6 PE=1 SV=1 - [RBBP6_HUMAN]	1	Q7Z6E9	S1328	E3 ubiquitin-protein ligase RBBP6 (EC 6.3.2.-) (Proliferation potential-related protein) (Protein P2P-R) (Retinoblastoma-binding Q protein 1) (RBQ-1) (Retinoblastoma-binding protein 6) (p53-associated cellular protein of testis)	RBBP6 P2PR PACT RBQ1 My038																									Reverse	Class I	wDkDDFEsEEEDVk	1	N-Term(Dimethyl:2H(4)); K3(Dimethyl:2H(4)); S8(Phospho); K14(Dimethyl:2H(4))	96	ETD	28	1	1946.87	3	649.627	-2.04	107.26	7165
AFVEDpSEDEDGAGEGGSSLLQK	1	S(6): 100.0; S(17): 0.0; S(18): 0.0	411	Q8N9T8	Protein KRI1 homolog OS=Homo sapiens GN=KRI1 PE=1 SV=2 - [KRI1_HUMAN]	1	Q8N9T8	S177	Protein KRI1 homolog	KRI1																									Reverse	Class I	aFVEDsEDEDGAGEGGSSLLQk	1	N-Term(Dimethyl); S6(Phospho); K22(Dimethyl)	144	HCD	13	0	2376.01	2	1188.51	-0.42	121.34	8883
VEEESTGDPFGFDpSDDESLPVSSK	1	S(5): 0.0; T(6): 0.0; S(14): 100.0; S(18): 0.0; S(22): 0.0; S(23): 0.0	410	Q7Z5K2	Wings apart-like protein homolog OS=Homo sapiens GN=WAPAL PE=1 SV=1 - [WAPL_HUMAN]	1	Q7Z5K2	S77	Wings apart-like protein homolog (Friend of EBNA2 protein)	WAPAL FOE KIAA0261 WAPL																									Reverse	Class I	vEEESTGDPFGFDsDDESLPVSSk	1	N-Term(Dimethyl:2H(4)); S14(Phospho); K24(Dimethyl:2H(4))	78	HCD	13	0	2717.19	3	906.401	1.02	140.39	10259
RVALpSDDETKETENMR	1	S(5): 100.0; T(9): 0.0; T(12): 0.0	410	Q15054	DNA polymerase delta subunit 3 OS=Homo sapiens GN=POLD3 PE=1 SV=2 - [DPOD3_HUMAN]	1	Q15054	S307	DNA polymerase delta subunit 3 (DNA polymerase delta subunit p66)	POLD3 KIAA0039																									Reverse	Class I	rVALsDDETkETENmR	1	N-Term(Dimethyl); S5(Phospho); K10(Dimethyl); M15(Oxidation)	105	ETD	32	2	2045.92	3	682.645	0.37	52.73	3331
IGDEYAEDpSpSDEEDIR	2	Y(5): 0.0; S(9): 100.0; S(10): 100.0	410	Q14137	Ribosome biogenesis protein BOP1 OS=Homo sapiens GN=BOP1 PE=1 SV=2 - [BOP1_HUMAN]	1	Q14137	S126, S127	Ribosome biogenesis protein BOP1 (Block of proliferation 1 protein)	BOP1 KIAA0124																									Reverse	Class I	iGDEYAEDssDEEDIR	1	N-Term(Dimethyl); S9(Phospho); S10(Phospho)	87	ETD	7	0	2030.71	3	677.576	-1.17	62.29	4317
EGAKDIDISpSPEFK	1	S(9): 0.0; S(10): 100.0	410	Q09666	Neuroblast differentiation-associated protein AHNAK OS=Homo sapiens GN=AHNAK PE=1 SV=2 - [AHNK_HUMAN]	1	Q09666	S177	Neuroblast differentiation-associated protein AHNAK (Desmoyokin)	AHNAK PM227																									Reverse	Class I	eGAkDIDISsPEFk	1	N-Term(Dimethyl:2H(4)); K4(Dimethyl:2H(4)); S10(Phospho); K14(Dimethyl:2H(4))	83	ETD	28	1	1711.89	3	571.302	-2.59	102.22	6874
LLEDGEDFNLGDALDSpSNSMQTIQK	1	S(16): 0.6; S(17): 99.4; S(19): 0.0; T(22): 0.0	409	P05783	Keratin, type I cytoskeletal 18 OS=Homo sapiens GN=KRT18 PE=1 SV=2 - [K1C18_HUMAN]	1	P05783	S399	Keratin, type I cytoskeletal 18 (Cell proliferation-inducing gene 46 protein) (Cytokeratin-18) (CK-18) (Keratin-18) (K18)	KRT18 CYK18 PIG46																									Reverse	Class I	lLEDGEDFNLGDALDSsNSmQTIQk	1	N-Term(Dimethyl); S17(Phospho); M20(Oxidation); K25(Dimethyl)	76	HCD	13	0	2892.29	3	964.768	0.77	145.04	11765
RQDEDYDEQVEEpSLQDEDDNDVYILTK	1	Y(6): 0.0; S(13): 100.0; Y(23): 0.0; T(26): 0.0	409	O00410	Importin-5 OS=Homo sapiens GN=IPO5 PE=1 SV=4 - [IPO5_HUMAN]	1	O00410	S827	Importin-5 (Imp5) (Importin subunit beta-3) (Karyopherin beta-3) (Ran-binding protein 5) (RanBP5)	IPO5 KPNB3 RANBP5																									Reverse	Class I	rQDEDYDEQVEEsLQDEDDNDVYILTk	1	N-Term(Dimethyl); S13(Phospho); K27(Dimethyl)	72	HCD	28	1	3439.46	3	1147.16	0.11	144.85	12245
KVELSEpSEEDKGGK	1	S(5): 0.0; S(7): 100.0	409	Q8IYB3	Serine/arginine repetitive matrix protein 1 OS=Homo sapiens GN=SRRM1 PE=1 SV=2 - [SRRM1_HUMAN]	1	Q8IYB3	S465	Serine/arginine repetitive matrix protein 1 (SR-related nuclear matrix protein of 160 kDa) (SRm160) (Ser/Arg-related nuclear matrix protein)	SRRM1 SRM160																									Reverse	Class I	kVELSEsEEDkGGk	1	K1(Dimethyl); N-Term(Dimethyl); S7(Phospho); K11(Dimethyl); K14(Dimethyl)	76	ETD	31	2	1726.84	3	576.287	-3.58	39.6	2531
APEAAVSEDGKpSDDELLSSK	1	S(7): 0.0; S(12): 100.0; S(18): 0.0; S(19): 0.0	409	Q8NEY1	Neuron navigator 1 OS=Homo sapiens GN=NAV1 PE=1 SV=2 - [NAV1_HUMAN]	1	Q8NEY1	S199	Neuron navigator 1 (Pore membrane and/or filament-interacting-like protein 3) (Steerin-1) (Unc-53 homolog 1) (unc53H1)	NAV1 KIAA1151 KIAA1213 POMFIL3 STEERIN1																									Reverse	Class I	aPEAAVSEDGksDDELLSSk	1	N-Term(Dimethyl); K11(Dimethyl); S12(Phospho); K20(Dimethyl)	130	ETD	27	1	2212.03	3	738.014	0.28	86.45	5871
VGpSLDNVGHLPAGGAVK	1	S(3): 100.0	409	P27816	Microtubule-associated protein 4 OS=Homo sapiens GN=MAP4 PE=1 SV=2 - [MAP4_HUMAN]	1	P27816	S1073	Microtubule-associated protein 4 (MAP-4)	MAP4																									Reverse	Class I	vGsLDNVGHLPAGGAVk	1	N-Term(Dimethyl:2H(4)); S3(Phospho); K17(Dimethyl:2H(4))	76	HCD	28	0	1734.94	2	867.973	0.32	104.25	8684
GDLpSDVEEEEEEEMDVDEATGAVKK	1	S(4): 100.0; T(20): 0.0	409	Q96ST3	Paired amphipathic helix protein Sin3a OS=Homo sapiens GN=SIN3A PE=1 SV=2 - [SIN3A_HUMAN]	1	Q96ST3	S832	Paired amphipathic helix protein Sin3a (Histone deacetylase complex subunit Sin3a) (Transcriptional corepressor Sin3a)	SIN3A																									Reverse	Class I	gDLsDVEEEEEEEmDVDEATGAVkk	1	N-Term(Dimethyl); S4(Phospho); M14(Oxidation); K24(Dimethyl); K25(Dimethyl)	65	HCD	26	1	2933.24	3	978.419	1.75	132.26	9161
NLGpSINTELQDVQR	1	S(4): 100.0; T(7): 0.0	408	O75396	Vesicle-trafficking protein SEC22b OS=Homo sapiens GN=SEC22B PE=1 SV=3 - [SC22B_HUMAN]	1	O75396	S137	Vesicle-trafficking protein SEC22b (ER-Golgi SNARE of 24 kDa) (ERS-24) (ERS24) (SEC22 vesicle-trafficking protein homolog B) (SEC22 vesicle-trafficking protein-like 1)	SEC22B SEC22L1																									Reverse	Class I	nLGsINTELQDVQR	1	N-Term(Dimethyl); S4(Phospho)	83	ETD	14	0	1694.81	3	565.609	1.1	135.65	10229
KTEVVMNSQQpTPVGTPK	1	T(2): 0.0; S(8): 0.0; T(11): 100.0; T(15): 0.0	408	O75781	Paralemmin OS=Homo sapiens GN=PALM PE=1 SV=2 - [PALM_HUMAN]	1	O75781	T141	Paralemmin-1 (Paralemmin)	PALM KIAA0270																									Reverse	Class I	kTEVVmNSQQtPVGTPk	1	N-Term(Dimethyl); K1(Dimethyl); M6(Oxidation); T11(Phospho); K17(Dimethyl)	91	ETD	29	1	2024.01	3	675.342	-0.48	40.24	2913
SQEPIPDDQKVpSDDDK	1	S(1): 0.0; S(12): 100.0	408	Q86UE4	Protein LYRIC OS=Homo sapiens GN=MTDH PE=1 SV=2 - [LYRIC_HUMAN]	1	Q86UE4	S426	Protein LYRIC (3D3/LYRIC) (Astrocyte elevated gene-1 protein) (AEG-1) (Lysine-rich CEACAM1 co-isolated protein) (Metadherin) (Metastasis adhesion protein)	MTDH AEG1 LYRIC																									Reverse	Class I	sQEPIPDDQkVsDDDk	1	N-Term(Dimethyl:2H(4)); K10(Dimethyl:2H(4)); S12(Phospho); K16(Dimethyl:2H(4))	83	ETD	27	1	1991.96	3	664.659	1.62	52.64	3597
NKTEDLEApTSEHFK	1	T(3): 0.0; T(9): 100.0; S(10): 0.0	408	Q9BV40	Vesicle-associated membrane protein 8 OS=Homo sapiens GN=VAMP8 PE=1 SV=1 - [VAMP8_HUMAN]	1	Q9BV40	T54	Vesicle-associated membrane protein 8 (VAMP-8) (Endobrevin) (EDB)	VAMP8																									Reverse	Class I	nkTEDLEAtSEHFk	1	N-Term(Dimethyl); K2(Dimethyl); T9(Phospho); K14(Dimethyl)	84	ETD	32	1	1812.84	3	604.952	-0.55	61.7	3785
KLEYDSGpSLKMEPGTSK	1	Y(4): 0.0; S(6): 0.0; S(8): 100.0; T(15): 0.0; S(16): 0.0	408	Q8NEY1	Neuron navigator 1 OS=Homo sapiens GN=NAV1 PE=1 SV=2 - [NAV1_HUMAN]	1	Q8NEY1	S490	Neuron navigator 1 (Pore membrane and/or filament-interacting-like protein 3) (Steerin-1) (Unc-53 homolog 1) (unc53H1)	NAV1 KIAA1151 KIAA1213 POMFIL3 STEERIN1																									Reverse	Class I	kLEYDSGsLkmEPGTSk	1	N-Term(Dimethyl:2H(4)); K1(Dimethyl:2H(4)); S8(Phospho); K10(Dimethyl:2H(4)); M11(Oxidation); K17(Dimethyl:2H(4))	101	ETD	31	2	2094.11	3	698.707	-3.45	64.36	4011
NGQLSTINGVAEQDELpSLQEGDLNGQK	1	S(5): 0.0; T(6): 0.0; S(17): 100.0	407	Q02952	A-kinase anchor protein 12 OS=Homo sapiens GN=AKAP12 PE=1 SV=3 - [AKA12_HUMAN]	1	Q02952	S75	A-kinase anchor protein 12 (AKAP-12) (A-kinase anchor protein 250 kDa) (AKAP 250) (Gravin) (Myasthenia gravis autoantigen)	AKAP12 AKAP250																									Reverse	Class I	nGQLSTINGVAEQDELsLQEGDLNGQk	1	N-Term(Dimethyl:2H(4)); S17(Phospho); K27(Dimethyl:2H(4))	90	HCD	14	0	3001.46	3	1001.16	0.23	135.5	10213
KSpSPSTGSLDSGNESK	1	S(2): 0.0; S(3): 97.7; S(5): 2.3; T(6): 0.0; S(8): 0.0; S(11): 0.0; S(15): 0.0	407	Q15057	Centaurin-beta-2 OS=Homo sapiens GN=CENTB2 PE=1 SV=3 - [CENB2_HUMAN]	1	Q15057	S379	Arf-GAP with coiled-coil, ANK repeat and PH domain-containing protein 2 (Centaurin-beta-2) (Cnt-b2)	ACAP2 CENTB2 KIAA0041																									Reverse	Class I	kSsPSTGSLDSGNESk	1	N-Term(Dimethyl); K1(Dimethyl); S3(Phospho); K16(Dimethyl)	81	ETD	28	1	1744.8	3	582.271	-1.81	32.05	2370
AADTEEMDIEMDpSGDEA	1	T(4): 0.0; S(13): 100.0	407	Q9UBB5	Methyl-CpG-binding domain protein 2 OS=Homo sapiens GN=MBD2 PE=1 SV=1 - [MBD2_HUMAN]	1	Q9UBB5	S407	Methyl-CpG-binding domain protein 2 (Demethylase) (DMTase) (Methyl-CpG-binding protein MBD2)	MBD2																									Reverse	Class I	aADTEEMDIEmDsGDEA	1	N-Term(Dimethyl:2H(4)); M11(Oxidation); S13(Phospho)	78	ETD	6	0	1956.7	3	652.904	3.31	61.44	4504
ISSKpSPGHMVILDQTK	1	S(2): 0.0; S(3): 0.0; S(5): 100.0; T(15): 0.0	407	Q9NWH9	SAFB-like transcription modulator OS=Homo sapiens GN=SLTM PE=1 SV=2 - [SLTM_HUMAN]	1	Q9NWH9	S553	SAFB-like transcription modulator (Modulator of estrogen-induced transcription)	SLTM MET																									Reverse	Class I	iSSksPGHmVILDQTk	1	N-Term(Dimethyl); K4(Dimethyl); S5(Phospho); M9(Oxidation); K16(Dimethyl)	75	ETD	30	1	1920.98	3	640.998	-3.41	66.56	4532
HFPLDLRTpSMDGK	1	T(8): 0.0; S(9): 100.0	407	Q01433	AMP deaminase 2 OS=Homo sapiens GN=AMPD2 PE=1 SV=2 - [AMPD2_HUMAN]	1	Q01433	S118	AMP deaminase 2 (EC 3.5.4.6) (AMP deaminase isoform L)	AMPD2																									Reverse	Class I	hFPLDLRTsmDGk	1	N-Term(Dimethyl); S9(Phospho); M10(Oxidation); K13(Dimethyl)	87	ETD	33	1	1668.78	3	556.933	0.8	111.2	6602
RWpSLASLPSSGYGTNTPSSTVSSSCSSQER	1	S(3): 100.0; S(6): 0.0; S(9): 0.0; S(10): 0.0; Y(12): 0.0; T(14): 0.0; T(16): 0.0; S(18): 0.0; S(19): 0.0; T(20): 0.0; S(22): 0.0; S(23): 0.0; S(24): 0.0; S(26): 0.0; S(27): 0.0	407	Q9Y2H9	Microtubule-associated serine/threonine-protein kinase 1 OS=Homo sapiens GN=MAST1 PE=1 SV=2 - [MAST1_HUMAN]	1	Q9Y2H9	S90	Microtubule-associated serine/threonine-protein kinase 1 (EC 2.7.11.1) (Syntrophin-associated serine/threonine-protein kinase)	MAST1 KIAA0973																									Reverse	Class I	rWsLASLPSSGYGTNTPSSTVSSScSSQER	1	N-Term(Dimethyl); S3(Phospho); C25(Carbamidomethyl)	75	HCD	27	1	3284.45	3	1095.49	-1.83	130.98	8371
MVIQGPSpSPQGEAMVTDVLEDQK	1	S(7): 0.5; S(8): 99.5; T(16): 0.0	406	Q12888	Tumor suppressor p53-binding protein 1 OS=Homo sapiens GN=TP53BP1 PE=1 SV=2 - [TP53B_HUMAN]	1	Q12888	S1114	Tumor suppressor p53-binding protein 1 (53BP1) (p53-binding protein 1) (p53BP1)	TP53BP1																									Reverse	Class I	mVIQGPSsPQGEAMVTDVLEDQk	1	N-Term(Dimethyl); S8(Phospho); K23(Dimethyl)	60	HCD	14	0	2595.21	3	865.742	1.28	146.17	12444
RQLQEDQENNLQDNQTSNSpSPCR	1	T(16): 0.0; S(17): 0.0; S(19): 0.5; S(20): 99.5	406	Q92576	PHD finger protein 3 OS=Homo sapiens GN=PHF3 PE=1 SV=3 - [PHF3_HUMAN]	1	Q92576	S1614	PHD finger protein 3	PHF3 KIAA0244																									Reverse	Class I	rQLQEDQENNLQDNQTSNSsPcR	1	N-Term(Dimethyl:2H(4)); S20(Phospho); C22(Carbamidomethyl)	71	HCD	30	1	2873.21	3	958.407	-12.09	45.14	2889
LLESSLSpSSEGEEPVEYK	1	S(4): 0.0; S(5): 0.0; S(7): 0.0; S(8): 100.0; S(9): 0.0; Y(17): 0.0	406	P08648	Integrin alpha-5 OS=Homo sapiens GN=ITGA5 PE=1 SV=2 - [ITA5_HUMAN]	1	P08648	S127	Integrin alpha-5 (CD49 antigen-like family member E) (Fibronectin receptor subunit alpha) (Integrin alpha-F) (VLA-5) (CD antigen CD49e) [Cleaved into: Integrin alpha-5 heavy chain; Integrin alpha-5 light chain]	ITGA5 FNRA																									Reverse	Class I	lLESSLSsSEGEEPVEYk	1	N-Term(Dimethyl); S8(Phospho); K18(Dimethyl)	81	ETD	13	0	2118.97	3	706.996	0.82	113.08	8303
EGSVLDILKpSPGFASPK	1	S(3): 0.0; S(10): 100.0; S(15): 0.0	406	P49790	Nuclear pore complex protein Nup153 OS=Homo sapiens GN=NUP153 PE=1 SV=2 - [NU153_HUMAN]	1	P49790	S614	Nuclear pore complex protein Nup153 (153 kDa nucleoporin) (Nucleoporin Nup153)	NUP153																									Reverse	Class I	eGSVLDILksPGFASPk	1	N-Term(Dimethyl); K9(Dimethyl); S10(Phospho); K17(Dimethyl)	80	ETD	27	1	1909	3	637.004	-5.83	142.75	9320
ASLLpTDEEDVDMALDQR	1	S(2): 0.0; T(5): 100.0	405	P52948	Nuclear pore complex protein Nup98-Nup96 OS=Homo sapiens GN=NUP98 PE=1 SV=3 - [NUP98_HUMAN]	1	P52948	T1000	Nuclear pore complex protein Nup98-Nup96 [Cleaved into: Nuclear pore complex protein Nup98 (98 kDa nucleoporin) (Nucleoporin Nup98); Nuclear pore complex protein Nup96 (96 kDa nucleoporin) (Nucleoporin Nup96)]	NUP98 ADAR2																									Reverse	Class I	aSLLtDEEDVDMALDQR	1	N-Term(Dimethyl); T5(Phospho)	91	ETD	13	0	2028.88	3	676.966	0.28	150.37	10997
AASDGQYENQpSPEATSPR	1	S(3): 0.0; Y(7): 0.0; S(11): 100.0; T(15): 0.0; S(16): 0.0	405	Q9HBL0	Tensin-1 OS=Homo sapiens GN=TNS1 PE=1 SV=1 - [TENS1_HUMAN]	1	Q9HBL0	S907	Tensin-1	TNS1 TNS																									Reverse	Class I	aASDGQYENQsPEATSPR	1	N-Term(Dimethyl:2H(4)); S11(Phospho)	115	ETD	14	0	2019.86	3	673.958	-0.51	43.16	3092
EVLDEDpTDEEKETLK	1	T(7): 100.0; T(13): 0.0	405	Q9Y3P9	Rab GTPase-activating protein 1 OS=Homo sapiens GN=RABGAP1 PE=1 SV=3 - [RBGP1_HUMAN]	1	Q9Y3P9	T996	Rab GTPase-activating protein 1 (GAP and centrosome-associated protein) (Rab6 GTPase-activating protein GAPCenA)	RABGAP1 HSPC094																									Reverse	Class I	eVLDEDtDEEkETLk	1	N-Term(Dimethyl); T7(Phospho); K11(Dimethyl); K15(Dimethyl)	104	ETD	27	1	1956.88	3	652.966	-5.46	78.05	5217
IRTQpSFSLQER	1	T(3): 0.0; S(5): 100.0; S(7): 0.0	405	P29474	Nitric oxide synthase, endothelial OS=Homo sapiens GN=NOS3 PE=1 SV=3 - [NOS3_HUMAN]	1	P29474	S1177	Nitric oxide synthase, endothelial (EC 1.14.13.39) (Constitutive NOS) (cNOS) (EC-NOS) (Endothelial NOS) (eNOS) (NOS type III) (NOSIII)	NOS3																									Reverse	Class I	iRTQsFSLQER	1	N-Term(Dimethyl); S5(Phospho)	82	ETD	29	1	1472.73	3	491.58	0.62	88.51	5309
GLSDHVpSLDGQELGTR	1	S(3): 0.0; S(7): 100.0; T(15): 0.0	405	Q7L8J4	SH3 domain-binding protein 5-like OS=Homo sapiens GN=SH3BP5L PE=2 SV=1 - [3BP5L_HUMAN]	1	Q7L8J4	S362	SH3 domain-binding protein 5-like (SH3BP-5-like)	SH3BP5L KIAA1720 UNQ2766/PRO7133																									Reverse	Class I	gLSDHVsLDGQELGTR	1	N-Term(Dimethyl); S7(Phospho)	93	ETD	28	0	1791.83	3	597.947	-0.27	112.18	7443
IpSMSEVDLNVAAPK	1	S(2): 100.0; S(4): 0.0	405	Q09666	Neuroblast differentiation-associated protein AHNAK OS=Homo sapiens GN=AHNAK PE=1 SV=2 - [AHNK_HUMAN]	1	Q09666	S570	Neuroblast differentiation-associated protein AHNAK (Desmoyokin)	AHNAK PM227																									Reverse	Class I	ismSEVDLNVAAPk	1	N-Term(Dimethyl:2H(4)); S2(Phospho); M3(Oxidation); K14(Dimethyl:2H(4))	75	ETD	13	0	1633.84	3	545.284	0.16	112.86	8288
TEpSPATAAETASEELDNR	1	T(1): 0.0; S(3): 100.0; T(6): 0.0; T(10): 0.0; S(12): 0.0	405	Q9NTJ3	Structural maintenance of chromosomes protein 4 OS=Homo sapiens GN=SMC4 PE=1 SV=2 - [SMC4_HUMAN]	1	Q9NTJ3	S41	Structural maintenance of chromosomes protein 4 (SMC protein 4) (SMC-4) (Chromosome-associated polypeptide C) (hCAP-C) (XCAP-C homolog)	SMC4 CAPC SMC4L1																									Reverse	Class I	tEsPATAAETASEELDNR	1	N-Term(Dimethyl); S3(Phospho)	108	ETD	13	0	1999.85	3	667.288	0.11	127.28	9286
ELEAERpSLMSpSPEDLTK	2	S(7): 100.0; S(10): 0.0; S(11): 100.0; T(16): 0.0	405	P46821	Microtubule-associated protein 1B OS=Homo sapiens GN=MAP1B PE=1 SV=1 - [MAP1B_HUMAN]	1	P46821	S828, S832	Microtubule-associated protein 1B (MAP-1B) [Cleaved into: MAP1 light chain LC1]	MAP1B																									Reverse	Class I	eLEAERsLMSsPEDLTk	1	N-Term(Dimethyl:2H(4)); S7(Phospho); S11(Phospho); K17(Dimethyl:2H(4))	84	ETD	14	1	2158.99	3	720.334	1.81	129.25	9733
GApSPLGPGSAAGSGAAASGGLGLGLGGR	1	S(3): 100.0; S(9): 0.0; S(13): 0.0; S(18): 0.0	404	Q6P1R3	Uncharacterized protein C11orf61 OS=Homo sapiens GN=C11orf61 PE=1 SV=1 - [CK061_HUMAN]	1	Q6P1R3	S48	Myb/SANT-like DNA-binding domain-containing protein 2	MSANTD2 C11orf61																									Reverse	Class I	gAsPLGPGSAAGSGAAASGGLGLGLGGR	1	N-Term(Dimethyl:2H(4)); S3(Phospho)	86	HCD	14	0	2335.19	3	779.067	6.76	138.56	11638
NFIGNSNHGSQpSPR	1	S(6): 0.0; S(10): 0.0; S(12): 100.0	404	Q03112	Ecotropic virus integration site 1 protein homolog OS=Homo sapiens GN=EVI1 PE=1 SV=2 - [EVI1_HUMAN]	1	Q03112	S860	MDS1 and EVI1 complex locus protein EVI1 (Ecotropic virus integration site 1 protein homolog) (EVI-1)	MECOM EVI1																									Reverse	Class I	nFIGNSNHGSQsPR	1	N-Term(Dimethyl); S12(Phospho)	89	ETD	29	0	1622.7	3	541.572	-4.05	46.2	3010
KVIYSQPpSARpSEGEFK	2	Y(4): 0.0; S(5): 0.0; S(8): 100.0; S(11): 100.0	404	Q9Y624	Junctional adhesion molecule A OS=Homo sapiens GN=F11R PE=1 SV=1 - [JAM1_HUMAN]	1	Q9Y624	S284, S287	Junctional adhesion molecule A (JAM-A) (Junctional adhesion molecule 1) (JAM-1) (Platelet F11 receptor) (Platelet adhesion molecule 1) (PAM-1) (CD antigen CD321)	F11R JAM1 JCAM UNQ264/PRO301																									Reverse	Class I	kVIYSQPsARsEGEFk	1	N-Term(Dimethyl); K1(Dimethyl); S8(Phospho); S11(Phospho); K16(Dimethyl)	92	ETD	29	2	2069.97	3	690.662	-0.3	76.65	5318
QALDpSEEEEEDVAAK	1	S(5): 100.0	404	Q8NC44	Protein FAM134A OS=Homo sapiens GN=FAM134A PE=1 SV=2 - [F134A_HUMAN]	1	Q8NC44	S385	Protein FAM134A	FAM134A C2orf17																									Reverse	Class I	qALDsEEEEEDVAAk	1	N-Term(Dimethyl:2H(4)); S5(Phospho); K15(Dimethyl:2H(4))	77	ETD	13	0	1806.82	3	602.943	1.02	74.92	5509
SLpSVPTDSGTTDVDYDEEQK	1	S(1): 0.3; S(3): 99.7; T(6): 0.0; S(8): 0.0; T(10): 0.0; T(11): 0.0; Y(15): 0.0	403	Q5HYW2	NHS-like protein 2 OS=Homo sapiens GN=NHSL2 PE=2 SV=1 - [NHSL2_HUMAN]	1	Q5HYW2	S134	NHS-like protein 2	NHSL2																									Reverse	Class I	sLsVPTDSGTTDVDYDEEQk	3	N-Term(Dimethyl:2H(4)); S3(Phospho); K20(Dimethyl:2H(4))	79	HCD	13	0	2330.04	3	777.353	1.14	103.18	7633
GFNGCDpSPEPDGEDSLEQSPLLEDK	1	S(7): 100.0; S(15): 0.0; S(19): 0.0	402	Q14814	Myocyte-specific enhancer factor 2D OS=Homo sapiens GN=MEF2D PE=1 SV=1 - [MEF2D_HUMAN]	1	Q14814	S98	Myocyte-specific enhancer factor 2D	MEF2D																									Reverse	Class I	gFNGcDsPEPDGEDSLEQSPLLEDk	1	N-Term(Dimethyl); C5(Carbamidomethyl); S7(Phospho); K25(Dimethyl)	69	HCD	13	0	2871.19	3	957.735	-0.27	138.44	10110
GTLpSDSEIETNSATSTIFGK	1	T(2): 0.0; S(4): 100.0; S(6): 0.0; T(10): 0.0; S(12): 0.0; T(14): 0.0; S(15): 0.0; T(16): 0.0	402	Q8WXG6	MAP kinase-activating death domain protein OS=Homo sapiens GN=MADD PE=1 SV=2 - [MADD_HUMAN]	1	Q8WXG6	S1239	MAP kinase-activating death domain protein (Differentially expressed in normal and neoplastic cells) (Insulinoma glucagonoma clone 20) (Rab3 GDP/GTP exchange factor)	MADD DENN IG20 KIAA0358																									Reverse	Class I	gTLsDSEIETNSATSTIFGk	1	N-Term(Dimethyl); S4(Phospho); K20(Dimethyl)	106	ETD	13	0	2194.02	3	732.011	0.52	140.54	10271
ISNLpSPEEEQGLWK	1	S(2): 0.0; S(5): 100.0	402	Q5HYJ3	Protein FAM76B OS=Homo sapiens GN=FAM76B PE=1 SV=2 - [FA76B_HUMAN]	1	Q5HYJ3	S193	Protein FAM76B	FAM76B																									Reverse	Class I	iSNLsPEEEQGLWk	1	N-Term(Dimethyl:2H(4)); S5(Phospho); K14(Dimethyl:2H(4))	95	ETD	14	0	1773.89	3	591.969	0.65	136.23	10284
QREMLMEDVGpSEEEQEEEDEAPFQEK	1	S(11): 100.0	402	Q9H1E3	Nuclear ubiquitous casein and cyclin-dependent kinases substrate OS=Homo sapiens GN=NUCKS1 PE=1 SV=1 - [NUCKS_HUMAN]	1	Q9H1E3	S113	Nuclear ubiquitous casein and cyclin-dependent kinase substrate 1 (P1)	NUCKS1 NUCKS JC7																									Reverse	Class I	qREmLmEDVGsEEEQEEEDEAPFQEk	1	N-Term(Dimethyl); M4(Oxidation); M6(Oxidation); S11(Phospho); K26(Dimethyl)	71	HCD	28	1	3309.38	3	1103.8	14.26	121.46	10504
GPDEAMEDGEEGpSDDEAEWVVTK	1	S(13): 100.0; T(22): 0.0	402	Q9NZN4	EH domain-containing protein 2 OS=Homo sapiens GN=EHD2 PE=1 SV=2 - [EHD2_HUMAN]	1	Q9NZN4	S438	EH domain-containing protein 2 (PAST homolog 2)	EHD2 PAST2																									Reverse	Class I	gPDEAMEDGEEGsDDEAEWVVTk	1	N-Term(Dimethyl); S13(Phospho); K23(Dimethyl)	75	HCD	13	0	2631.04	3	877.684	1.32	136.25	10964
STSAPQMSPGSSDNQSSpSPQPAQQK	1	S(1): 0.0; T(2): 0.0; S(3): 0.0; S(8): 0.0; S(11): 0.0; S(12): 0.0; S(16): 0.0; S(17): 0.5; S(18): 99.5	402	Q14157	Ubiquitin-associated protein 2-like OS=Homo sapiens GN=UBAP2L PE=1 SV=2 - [UBP2L_HUMAN]	1	Q14157	S477	Ubiquitin-associated protein 2-like (Protein NICE-4)	UBAP2L KIAA0144 NICE4																									Reverse	Class I	sTSAPQmSPGSSDNQSSsPQPAQQk	1	N-Term(Dimethyl:2H(4)); M7(Oxidation); S18(Phospho); K25(Dimethyl:2H(4))	61	HCD	14	0	2692.2	3	898.072	-0.1	32.13	2410
QHAALAAQSKpSSEDIIK	1	S(9): 0.0; S(11): 100.0; S(12): 0.0	402	O14639	Actin-binding LIM protein 1 OS=Homo sapiens GN=ABLIM1 PE=1 SV=3 - [ABLM1_HUMAN]	1	O14639	S540	Actin-binding LIM protein 1 (abLIM-1) (Actin-binding LIM protein family member 1) (Actin-binding double zinc finger protein) (LIMAB1) (Limatin)	ABLIM1 ABLIM KIAA0059 LIMAB1																									Reverse	Class I	qHAALAAQSksSEDIIk	1	N-Term(Dimethyl); K10(Dimethyl); S11(Phospho); K17(Dimethyl)	121	ETD	32	1	1961.01	3	654.342	0.5	63.02	4047
SKpSYDEGLDDYREDAK	1	S(1): 0.0; S(3): 100.0; Y(4): 0.0; Y(11): 0.0	402	Q5T5U3	Rho GTPase-activating protein 21 OS=Homo sapiens GN=ARHGAP21 PE=1 SV=1 - [RHG21_HUMAN]	1	Q5T5U3	S880	Rho GTPase-activating protein 21 (Rho GTPase-activating protein 10) (Rho-type GTPase-activating protein 21)	ARHGAP21 ARHGAP10 KIAA1424																									Reverse	Class I	sksYDEGLDDYREDAk	1	N-Term(Dimethyl:2H(4)); K2(Dimethyl:2H(4)); S3(Phospho); K16(Dimethyl:2H(4))	76	ETD	31	2	2066.97	3	689.66	-2.1	74.88	4555
NIGRDpTPTSAGPNSFNK	1	T(6): 100.0; T(8): 0.0; S(9): 0.0; S(14): 0.0	402	Q8WW12	PEST proteolytic signal-containing nuclear protein OS=Homo sapiens GN=PCNP PE=1 SV=2 - [PCNP_HUMAN]	1	Q8WW12	T139	PEST proteolytic signal-containing nuclear protein (PCNP) (PEST-containing nuclear protein)	PCNP																									Reverse	Class I	nIGRDtPTSAGPNSFNk	1	N-Term(Dimethyl:2H(4)); T6(Phospho); K17(Dimethyl:2H(4))	78	ETD	28	1	1919.94	3	640.653	-1.34	64.91	4574
VNPVTSLSENYTCpSDSEESSEK	1	T(5): 0.0; S(6): 0.0; S(8): 0.0; Y(11): 0.0; T(12): 0.0; S(14): 100.0; S(16): 0.0; S(19): 0.0; S(20): 0.0	402	Q14432	cGMP-inhibited 3',5'-cyclic phosphodiesterase A OS=Homo sapiens GN=PDE3A PE=1 SV=3 - [PDE3A_HUMAN]	1	Q14432	S408	cGMP-inhibited 3',5'-cyclic phosphodiesterase A (EC 3.1.4.17) (Cyclic GMP-inhibited phosphodiesterase A) (CGI-PDE A)	PDE3A																									Reverse	Class I	vNPVTSLSENYTcsDSEESSEk	1	N-Term(Dimethyl); C13(Carbamidomethyl); S14(Phospho); K22(Dimethyl)	84	HCD	13	0	2598.08	3	866.699	0.5	113.38	8321
TEDGGWEWpSDDEFDEESEEGK	1	T(1): 0.0; S(9): 100.0; S(17): 0.0	401	O95747	Serine/threonine-protein kinase OSR1 OS=Homo sapiens GN=OXSR1 PE=1 SV=1 - [OXSR1_HUMAN]	1	O95747	S339	Serine/threonine-protein kinase OSR1 (EC 2.7.11.1) (Oxidative stress-responsive 1 protein)	OXSR1 KIAA1101 OSR1																									Reverse	Class I	tEDGGWEWsDDEFDEESEEGk	1	N-Term(Dimethyl:2H(4)); S9(Phospho); K21(Dimethyl:2H(4))	75	HCD	13	0	2620	3	874.006	1.2	141.21	10317
CSSSSGGGpSpSGDEDGLELDGAPGGGK	2	S(2): 0.0; S(3): 0.0; S(4): 0.0; S(5): 0.0; S(9): 100.0; S(10): 100.0	401	Q9P258	Protein RCC2 OS=Homo sapiens GN=RCC2 PE=1 SV=2 - [RCC2_HUMAN]	1	Q9P258	S50, S51	Protein RCC2 (RCC1-like protein TD-60) (Telophase disk protein of 60 kDa)	RCC2 KIAA1470 TD60																									Reverse	Class I	cSSSSGGGssGDEDGLELDGAPGGGk	1	N-Term(Dimethyl:2H(4)); C1(Carbamidomethyl); S9(Phospho); S10(Phospho); K26(Dimethyl:2H(4))	46	HCD	7	0	2564	3	855.337	-0.59	66.24	4604
SSpSVGSSSSYPISPAVSR	1	S(1): 0.0; S(2): 0.0; S(3): 100.0; S(6): 0.0; S(7): 0.0; S(8): 0.0; S(9): 0.0; Y(10): 0.0; S(13): 0.0; S(17): 0.0	401	Q15149	Plectin-1 OS=Homo sapiens GN=PLEC1 PE=1 SV=2 - [PLEC1_HUMAN]	1	Q15149	S4386	Plectin (PCN) (PLTN) (Hemidesmosomal protein 1) (HD1) (Plectin-1)	PLEC PLEC1																									Reverse	Class I	sSsVGSSSSYPISPAVSR	1	N-Term(Dimethyl); S3(Phospho)	90	ETD	4	0	1862.85	3	621.623	0.83	63.5	4921
FLQEHGSDpSFLAEHK	1	S(7): 0.1; S(9): 99.9	401	Q00688	FK506-binding protein 3 OS=Homo sapiens GN=FKBP3 PE=1 SV=1 - [FKBP3_HUMAN]	1	Q00688	S36	Peptidyl-prolyl cis-trans isomerase FKBP3 (PPIase FKBP3) (EC 5.2.1.8) (25 kDa FK506-binding protein) (25 kDa FKBP) (FKBP-25) (FK506-binding protein 3) (FKBP-3) (Immunophilin FKBP25) (Rapamycin-selective 25 kDa immunophilin) (Rotamase)	FKBP3 FKBP25																									Reverse	Class I	fLQEHGSDsFLAEHk	1	N-Term(Dimethyl); S9(Phospho); K15(Dimethyl)	75	ETD	31	0	1880.85	3	627.623	-1.87	97.2	5694
ASQSRPNpSSALETLGGEK	1	S(2): 0.0; S(4): 0.0; S(8): 99.9; S(9): 0.1; T(13): 0.0	401	O94804	Serine/threonine-protein kinase 10 OS=Homo sapiens GN=STK10 PE=1 SV=1 - [STK10_HUMAN]	1	O94804	S454	Serine/threonine-protein kinase 10 (EC 2.7.11.1) (Lymphocyte-oriented kinase)	STK10 LOK																									Reverse	Class I	aSQSRPNsSALETLGGEk	1	N-Term(Dimethyl:2H(4)); S8(Phospho); K18(Dimethyl:2H(4))	103	ETD	28	0	1975.99	3	659.336	0.16	83.17	5766
HGpSGADpSDYENTQSGDPLLGLEGK	2	S(3): 100.0; S(7): 99.6; Y(9): 0.4; T(12): 0.0; S(14): 0.0	400	Q9Y2X7	ARF GTPase-activating protein GIT1 OS=Homo sapiens GN=GIT1 PE=1 SV=2 - [GIT1_HUMAN]	1	Q9Y2X7	S592, S596	ARF GTPase-activating protein GIT1 (ARF GAP GIT1) (Cool-associated and tyrosine-phosphorylated protein 1) (CAT-1) (CAT1) (G protein-coupled receptor kinase-interactor 1) (GRK-interacting protein 1)	GIT1																									Reverse	Class I	hGsGADsDYENTQSGDPLLGLEGk	1	N-Term(Dimethyl:2H(4)); S3(Phospho); S7(Phospho); K24(Dimethyl:2H(4))	59	HCD	14	0	2671.16	3	891.058	6.43	141.47	11954
SRpSGEGEVSGLMR	1	S(1): 0.0; S(3): 100.0; S(9): 0.0	400	Q13263	Transcription intermediary factor 1-beta OS=Homo sapiens GN=TRIM28 PE=1 SV=5 - [TIF1B_HUMAN]	1	Q13263	S473	Transcription intermediary factor 1-beta (TIF1-beta) (E3 SUMO-protein ligase TRIM28) (EC 6.3.2.-) (KRAB-associated protein 1) (KAP-1) (KRAB-interacting protein 1) (KRIP-1) (Nuclear corepressor KAP-1) (RING finger protein 96) (Tripartite motif-containing protein 28)	TRIM28 KAP1 RNF96 TIF1B																									Reverse	Class I	sRsGEGEVSGLmR	1	N-Term(Dimethyl); S3(Phospho); M12(Oxidation)	93	ETD	29	1	1488.65	3	496.888	-1.32	48.36	3460
RAPpSVANVGSHCDLSLK	1	S(4): 100.0; S(10): 0.0; S(15): 0.0	400	P21333	Filamin-A OS=Homo sapiens GN=FLNA PE=1 SV=4 - [FLNA_HUMAN]	1	P21333	S2152	Filamin-A (FLN-A) (Actin-binding protein 280) (ABP-280) (Alpha-filamin) (Endothelial actin-binding protein) (Filamin-1) (Non-muscle filamin)	FLNA FLN FLN1																									Reverse	Class I	rAPsVANVGSHcDLSLk	1	N-Term(Dimethyl:2H(4)); S4(Phospho); C12(Carbamidomethyl); K17(Dimethyl:2H(4))	94	ETD	31	1	1955	3	652.339	-0.39	81.58	4745
WTKPSSFpSDSER	1	T(2): 0.0; S(5): 0.0; S(6): 0.0; S(8): 100.0; S(10): 0.0	400	Q8NC56	LEM domain-containing protein 2 OS=Homo sapiens GN=LEMD2 PE=1 SV=1 - [LEMD2_HUMAN]	1	Q8NC56	S499	LEM domain-containing protein 2 (hLEM2)	LEMD2																									Reverse	Class I	wTkPSSFsDSER	1	N-Term(Dimethyl); K3(Dimethyl); S8(Phospho)	84	ETD	29	0	1562.69	3	521.568	-0.25	73.74	5132
RTpSMGGTQQQFVEGVR	1	T(2): 0.0; S(3): 100.0; T(7): 0.0	400	P35222	Catenin beta-1 OS=Homo sapiens GN=CTNNB1 PE=1 SV=1 - [CTNB1_HUMAN]	1	P35222	S552	Catenin beta-1 (Beta-catenin)	CTNNB1 CTNNB OK/SW-cl.35 PRO2286																									Reverse	Class I	rTsmGGTQQQFVEGVR	1	N-Term(Dimethyl); S3(Phospho); M4(Oxidation)	98	ETD	28	1	1904.87	3	635.627	-1.65	74.96	5203
FNDpSEGDDTEETEDYR	1	S(4): 100.0; T(9): 0.0; T(12): 0.0; Y(15): 0.0	400	Q9NYF8	Bcl-2-associated transcription factor 1 OS=Homo sapiens GN=BCLAF1 PE=1 SV=2 - [BCLF1_HUMAN]	1	Q9NYF8	S397	Bcl-2-associated transcription factor 1 (Btf)	BCLAF1 BTF KIAA0164																									Reverse	Class I	fNDsEGDDTEETEDYR	1	N-Term(Dimethyl:2H(4)); S4(Phospho)	119	HCD	13	0	2033.74	2	1017.37	-0.47	73.58	5402
RVLLQApSQDENFGNTTPR	1	S(7): 100.0; T(15): 0.0; T(16): 0.0	400	P57740	Nuclear pore complex protein Nup107 OS=Homo sapiens GN=NUP107 PE=1 SV=1 - [NU107_HUMAN]	1	P57740	S37	Nuclear pore complex protein Nup107 (107 kDa nucleoporin) (Nucleoporin Nup107)	NUP107																									Reverse	Class I	rVLLQAsQDENFGNTTPR	1	N-Term(Dimethyl); S7(Phospho)	95	ETD	29	1	2154.02	3	718.679	-5.6	96.98	5758
RSFpSADNFIGIQR	1	S(2): 0.0; S(4): 100.0	400	Q8N7R7	Cyclin-Y-like protein 1 OS=Homo sapiens GN=CCNYL1 PE=1 SV=2 - [CCYL1_HUMAN]	1	Q8N7R7	S344	Cyclin-Y-like protein 1	CCNYL1																									Reverse	Class I	rSFsADNFIGIQR	1	N-Term(Dimethyl:2H(4)); S4(Phospho)	81	ETD	29	1	1622.8	3	541.604	-0.1	126.26	8290
ETNLDSLPLVDTHpSK	1	T(2): 0.0; S(6): 0.0; T(12): 0.0; S(14): 100.0	400	P08670	Vimentin OS=Homo sapiens GN=VIM PE=1 SV=4 - [VIME_HUMAN]	1	P08670	S438	Vimentin	VIM																									Reverse	Class I	eTNLDSLPLVDTHsk	1	N-Term(Dimethyl:2H(4)); S14(Phospho); K15(Dimethyl:2H(4))	132	ETD	27	0	1812.93	3	604.98	1.46	125.52	8521
KGGEFDEFVNDDpTDDDLPISK	1	T(13): 100.0; S(20): 0.0	400	Q6PD62	RNA polymerase-associated protein CTR9 homolog OS=Homo sapiens GN=CTR9 PE=1 SV=1 - [CTR9_HUMAN]	1	Q6PD62	T925	RNA polymerase-associated protein CTR9 homolog (SH2 domain-binding protein 1)	CTR9 KIAA0155 SH2BP1																									Reverse	Class I	kGGEFDEFVNDDtDDDLPISk	1	N-Term(Dimethyl); K1(Dimethyl); T13(Phospho); K21(Dimethyl)	57	HCD	28	1	2520.1	3	840.706	-1.28	137.38	8909
SYpSSPDITQAIQEEEK	1	S(1): 0.0; Y(2): 0.0; S(3): 100.0; S(4): 0.0; T(8): 0.0	400	P40818	Ubiquitin carboxyl-terminal hydrolase 8 OS=Homo sapiens GN=USP8 PE=1 SV=1 - [UBP8_HUMAN]	1	P40818	S718	Ubiquitin carboxyl-terminal hydrolase 8 (EC 3.4.19.12) (Deubiquitinating enzyme 8) (Ubiquitin isopeptidase Y) (hUBPy) (Ubiquitin thioesterase 8) (Ubiquitin-specific-processing protease 8)	USP8 KIAA0055 UBPY																									Reverse	Class I	sYsSPDITQAIQEEEk	1	N-Term(Dimethyl); S3(Phospho); K16(Dimethyl)	89	ETD	13	0	1960.88	3	654.299	1.33	134.57	9801
GFGFGQGAGALVHpSE	1	S(14): 100.0	399	P21291	Cysteine and glycine-rich protein 1 OS=Homo sapiens GN=CSRP1 PE=1 SV=3 - [CSRP1_HUMAN]	1	P21291	S192	Cysteine and glycine-rich protein 1 (Cysteine-rich protein 1) (CRP) (CRP1)	CSRP1 CSRP CYRP																									Reverse	Class I	gFGFGQGAGALVHsE	1	N-Term(Dimethyl); S14(Phospho)	57	HCD	14	0	1541.68	2	771.343	0.24	140.69	11866
STSAPQMpSPGSSDNQSSSPQPAQQK	1	S(1): 0.0; T(2): 0.0; S(3): 0.0; S(8): 100.0; S(11): 0.0; S(12): 0.0; S(16): 0.0; S(17): 0.0; S(18): 0.0	399	Q14157	Ubiquitin-associated protein 2-like OS=Homo sapiens GN=UBAP2L PE=1 SV=2 - [UBP2L_HUMAN]	1	Q14157	S467	Ubiquitin-associated protein 2-like (Protein NICE-4)	UBAP2L KIAA0144 NICE4																									Reverse	Class I	sTSAPQMsPGSSDNQSSSPQPAQQk	1	N-Term(Dimethyl:2H(4)); S8(Phospho); K25(Dimethyl:2H(4))	106	HCD	14	0	2676.21	2	1338.61	0.33	47.12	3396
IRpTQSFpSLQER	2	T(3): 100.0; S(5): 0.0; S(7): 100.0	399	P29474	Nitric oxide synthase, endothelial OS=Homo sapiens GN=NOS3 PE=1 SV=3 - [NOS3_HUMAN]	1	P29474	T1175, S1179	Nitric oxide synthase, endothelial (EC 1.14.13.39) (Constitutive NOS) (cNOS) (EC-NOS) (Endothelial NOS) (eNOS) (NOS type III) (NOSIII)	NOS3																									Reverse	Class I	iRtQSFsLQER	1	N-Term(Dimethyl); T3(Phospho); S7(Phospho)	68	ETD	17	1	1552.69	3	518.236	0.32	59.45	4271
IKpSFDSLGSQSLHTR	1	S(3): 100.0; S(6): 0.0; S(9): 0.0; S(11): 0.0; T(14): 0.0	399	Q14155	Rho guanine nucleotide exchange factor 7 OS=Homo sapiens GN=ARHGEF7 PE=1 SV=2 - [ARHG7_HUMAN]	1	Q14155	S153	Rho guanine nucleotide exchange factor 7 (Beta-Pix) (COOL-1) (PAK-interacting exchange factor beta) (p85)	ARHGEF7 COOL1 KIAA0142 P85SPR PAK3BP PIXB Nbla10314																									Reverse	Class I	iksFDSLGSQSLHTR	1	N-Term(Dimethyl); K2(Dimethyl); S3(Phospho)	97	ETD	32	1	1811.91	3	604.641	1.68	91.12	5551
ILpSDVTHSAVFGVPASK	1	S(3): 100.0; T(6): 0.0; S(8): 0.0; S(16): 0.0	399	Q2M2I8	AP2-associated protein kinase 1 OS=Homo sapiens GN=AAK1 PE=1 SV=2 - [AAK1_HUMAN]	1	Q2M2I8	S637	AP2-associated protein kinase 1 (EC 2.7.11.1) (Adaptor-associated kinase 1)	AAK1 KIAA1048																									Reverse	Class I	iLsDVTHSAVFGVPASk	1	N-Term(Dimethyl); S3(Phospho); K17(Dimethyl)	99	ETD	27	0	1863.97	3	621.994	3.72	133	8504
SEpSLDPDSSMDTTLILK	1	S(1): 0.0; S(3): 100.0; S(8): 0.0; S(9): 0.0; T(12): 0.0; T(13): 0.0	398	Q5SW79	Centrosomal protein of 170 kDa OS=Homo sapiens GN=CEP170 PE=1 SV=1 - [CE170_HUMAN]	1	Q5SW79	S881	Centrosomal protein of 170 kDa (Cep170) (KARP-1-binding protein) (KARP1-binding protein)	CEP170 FAM68A KAB KIAA0470																									Reverse	Class I	sEsLDPDSSMDTTLILk	1	N-Term(Dimethyl); S3(Phospho); K17(Dimethyl)	78	ETD	13	0	1987.92	3	663.311	0.26	141.68	10356
NEGSEpSAPEGQAQQR	1	S(4): 0.0; S(6): 100.0	398	P67809	Nuclease-sensitive element-binding protein 1 OS=Homo sapiens GN=YBX1 PE=1 SV=3 - [YBOX1_HUMAN]	1	P67809	S176	Nuclease-sensitive element-binding protein 1 (CCAAT-binding transcription factor I subunit A) (CBF-A) (DNA-binding protein B) (DBPB) (Enhancer factor I subunit A) (EFI-A) (Y-box transcription factor) (Y-box-binding protein 1) (YB-1)	YBX1 NSEP1 YB1																									Reverse	Class I	nEGSEsAPEGQAQQR	1	N-Term(Dimethyl); S6(Phospho)	90	ETD	14	0	1695.7	3	565.904	-0.33	28.57	2073
VENMSSNQDGNDpSDEFM	1	S(5): 0.0; S(6): 0.0; S(13): 100.0	398	Q86WR0	Coiled-coil domain-containing protein 25 OS=Homo sapiens GN=CCDC25 PE=1 SV=2 - [CCD25_HUMAN]	1	Q86WR0	S204	Coiled-coil domain-containing protein 25	CCDC25																									Reverse	Class I	vENMSSNQDGNDsDEFm	1	N-Term(Dimethyl:2H(4)); S13(Phospho); M17(Oxidation)	92	ETD	6	0	2046.73	3	682.914	1.35	54.36	4004
STPSHGSVSSLNSTGSLpSPK	1	S(1): 0.0; T(2): 0.0; S(4): 0.0; S(7): 0.0; S(9): 0.0; S(10): 0.0; S(13): 0.0; T(14): 0.0; S(16): 0.0; S(18): 100.0	398	Q9UBC2	Epidermal growth factor receptor substrate 15-like 1 OS=Homo sapiens GN=EPS15L1 PE=1 SV=1 - [EP15R_HUMAN]	1	Q9UBC2	S255	Epidermal growth factor receptor substrate 15-like 1 (Eps15-related protein) (Eps15R)	EPS15L1 EPS15R																									Reverse	Class I	sTPSHGSVSSLNSTGSLsPk	1	N-Term(Dimethyl); S18(Phospho); K20(Dimethyl)	92	ETD	28	0	2065.98	3	689.331	-0.78	64.36	4536
NHSDSSTSESEVSSVpSPLK	1	S(3): 0.0; S(5): 0.0; S(6): 0.0; T(7): 0.0; S(8): 0.0; S(10): 0.0; S(13): 0.0; S(14): 0.0; S(16): 100.0	398	Q9NY27	Serine/threonine-protein phosphatase 4 regulatory subunit 2 OS=Homo sapiens GN=PPP4R2 PE=1 SV=3 - [PP4R2_HUMAN]	1	Q9NY27	S226	Serine/threonine-protein phosphatase 4 regulatory subunit 2	PPP4R2 SBBI57																									Reverse	Class I	nHSDSSTSESEVSSVsPLk	1	N-Term(Dimethyl:2H(4)); S16(Phospho); K19(Dimethyl:2H(4))	101	ETD	29	0	2120.98	3	707.666	0.32	64.12	4538
KLpSLPTDLKPDLDVK	1	S(3): 100.0; T(6): 0.0	398	Q5T5C0	Syntaxin-binding protein 5 OS=Homo sapiens GN=STXBP5 PE=1 SV=1 - [STXB5_HUMAN]	1	Q5T5C0	S759	Syntaxin-binding protein 5 (Lethal(2) giant larvae protein homolog 3) (Tomosyn-1)	STXBP5 LLGL3																									Reverse	Class I	kLsLPTDLkPDLDVk	1	K1(Dimethyl:2H(4)); N-Term(Dimethyl:2H(4)); S3(Phospho); K9(Dimethyl:2H(4)); K15(Dimethyl:2H(4))	92	ETD	30	1	1890.16	3	630.724	-5.04	134.92	8306
TSRAPpSVATVGSICDLNLK	1	T(1): 0.0; S(2): 0.0; S(6): 100.0; T(9): 0.0; S(12): 0.0	398	O75369	Filamin-B OS=Homo sapiens GN=FLNB PE=1 SV=1 - [FLNB_HUMAN]	1	O75369	S2107	Filamin-B (FLN-B) (ABP-278) (ABP-280 homolog) (Actin-binding-like protein) (Beta-filamin) (Filamin homolog 1) (Fh1) (Filamin-3) (Thyroid autoantigen) (Truncated actin-binding protein) (Truncated ABP)	FLNB FLN1L FLN3 TABP TAP																									Reverse	Class I	tSRAPsVATVGSIcDLNLk	1	N-Term(Dimethyl); S6(Phospho); C14(Carbamidomethyl); K19(Dimethyl)	85	ETD	28	1	2125.07	3	709.029	-0.24	132.01	8571
NLTANDPSQEYVApSEGEEDPEVEFLK	1	T(3): 0.0; S(8): 0.0; Y(11): 0.0; S(14): 100.0	397	Q86X95	CBF1-interacting corepressor OS=Homo sapiens GN=CIR PE=1 SV=1 - [CIR_HUMAN]	1	Q86X95	S202	Corepressor interacting with RBPJ 1 (CBF1-interacting corepressor) (Recepin)	CIR1 CIR																									Reverse	Class I	nLTANDPSQEYVAsEGEEDPEVEFLk	1	N-Term(Dimethyl); S14(Phospho); K26(Dimethyl)	75	HCD	13	0	3046.35	3	1016.12	0.67	144.98	11759
IDASKNEEDEGHSNpSSPR	1	S(4): 0.0; S(13): 0.0; S(15): 99.7; S(16): 0.3	397	Q14103	Heterogeneous nuclear ribonucleoprotein D0 OS=Homo sapiens GN=HNRNPD PE=1 SV=1 - [HNRPD_HUMAN]	1	Q14103	S82	Heterogeneous nuclear ribonucleoprotein D0 (hnRNP D0) (AU-rich element RNA-binding protein 1)	HNRNPD AUF1 HNRPD																									Reverse	Class I	iDASkNEEDEGHSNSsPR	1	N-Term(Dimethyl:2H(4)); K5(Dimethyl:2H(4)); S16(Phospho)	67	HCD	32	1	2115.94	2	1058.47	-3.43	27.65	2068
AQLGGPEAAKpSDETAAK	1	S(11): 100.0; T(14): 0.0	397	P04792	Heat shock protein beta-1 OS=Homo sapiens GN=HSPB1 PE=1 SV=2 - [HSPB1_HUMAN]	1	P04792	S199	Heat shock protein beta-1 (HspB1) (28 kDa heat shock protein) (Estrogen-regulated 24 kDa protein) (Heat shock 27 kDa protein) (HSP 27) (Stress-responsive protein 27) (SRP27)	HSPB1 HSP27 HSP28																									Reverse	Class I	aQLGGPEAAksDETAAk	1	N-Term(Dimethyl:2H(4)); K10(Dimethyl:2H(4)); S11(Phospho); K17(Dimethyl:2H(4))	97	ETD	27	1	1819.96	3	607.324	-0.17	46.4	3179
GKGGVTGpSPEASISGSKGDLK	1	T(6): 0.0; S(8): 100.0; S(12): 0.0; S(14): 0.0; S(16): 0.0	397	Q09666	Neuroblast differentiation-associated protein AHNAK OS=Homo sapiens GN=AHNAK PE=1 SV=2 - [AHNK_HUMAN]	1	Q09666	S5731	Neuroblast differentiation-associated protein AHNAK (Desmoyokin)	AHNAK PM227																									Reverse	Class I	gkGGVTGsPEASISGSkGDLk	1	N-Term(Dimethyl:2H(4)); K2(Dimethyl:2H(4)); S8(Phospho); K17(Dimethyl:2H(4)); K21(Dimethyl:2H(4))	110	ETD	31	2	2140.19	3	714.068	-3.1	64.73	4031
HLGGSGSVVPGpSPCLDR	1	S(5): 0.0; S(7): 0.0; S(12): 100.0	397	Q9HBL0	Tensin-1 OS=Homo sapiens GN=TNS1 PE=1 SV=1 - [TENS1_HUMAN]	1	Q9HBL0	S1314	Tensin-1	TNS1 TNS																									Reverse	Class I	hLGGSGSVVPGsPcLDR	1	N-Term(Dimethyl:2H(4)); S12(Phospho); C14(Carbamidomethyl)	87	ETD	29	0	1806.84	3	602.953	-3.86	85.72	5170
IEpSDEEEDFENVGK	1	S(3): 100.0	397	Q96T23	Remodeling and spacing factor 1 OS=Homo sapiens GN=RSF1 PE=1 SV=1 - [RSF1_HUMAN]	1	Q96T23	S1335	Remodeling and spacing factor 1 (Rsf-1) (HBV pX-associated protein 8) (Hepatitis B virus X-associated protein) (p325 subunit of RSF chromatin-remodeling complex)	RSF1 HBXAP XAP8																									Reverse	Class I	iEsDEEEDFENVGk	1	N-Term(Dimethyl); S3(Phospho); K14(Dimethyl)	92	ETD	13	0	1775.73	3	592.58	0.14	107	7895
IEVLPVDTGAGGYSGNSGpSPK	1	T(8): 0.0; Y(13): 0.0; S(14): 0.0; S(17): 0.0; S(19): 100.0	397	Q92738	USP6 N-terminal-like protein OS=Homo sapiens GN=USP6NL PE=1 SV=3 - [US6NL_HUMAN]	1	Q92738	S716	USP6 N-terminal-like protein (Related to the N-terminus of tre) (RN-tre)	USP6NL KIAA0019																									Reverse	Class I	iEVLPVDTGAGGYSGNSGsPk	1	N-Term(Dimethyl:2H(4)); S19(Phospho); K21(Dimethyl:2H(4))	94	ETD	14	0	2149.07	3	717.029	2.07	128.25	9661
LPSGSGAApSPTGpSAVDIR	2	S(3): 0.0; S(5): 0.0; S(9): 96.9; T(11): 3.1; S(13): 100.0	396	Q09666	Neuroblast differentiation-associated protein AHNAK OS=Homo sapiens GN=AHNAK PE=1 SV=2 - [AHNK_HUMAN]	1	Q09666	S216, S220	Neuroblast differentiation-associated protein AHNAK (Desmoyokin)	AHNAK PM227																									Reverse	Class I	lPSGSGAAsPTGsAVDIR	1	N-Term(Dimethyl); S9(Phospho); S13(Phospho)	84	ETD	7	0	1830.8	3	610.94	0.64	57.28	3991
AETSEGSGSAPAVPEASApSPK	1	T(3): 0.0; S(4): 0.0; S(7): 0.0; S(9): 0.0; S(17): 0.0; S(19): 100.0	396	P51608	Methyl-CpG-binding protein 2 OS=Homo sapiens GN=MECP2 PE=1 SV=1 - [MECP2_HUMAN]	1	P51608	S80	Methyl-CpG-binding protein 2 (MeCp-2 protein) (MeCp2)	MECP2																									Reverse	Class I	aETSEGSGSAPAVPEASAsPk	1	N-Term(Dimethyl:2H(4)); S19(Phospho); K21(Dimethyl:2H(4))	104	ETD	14	0	2073.98	3	691.999	-0.87	59.58	4400
RADNCpSPVAEEETTGSAESTLPK	1	S(6): 100.0; T(13): 0.0; T(14): 0.0; S(16): 0.0; S(19): 0.0; T(20): 0.0	396	Q9C0D5	Protein TANC1 OS=Homo sapiens GN=TANC1 PE=1 SV=2 - [TANC1_HUMAN]	1	Q9C0D5	S270	Protein TANC1 (Tetratricopeptide repeat, ankyrin repeat and coiled-coil domain-containing protein 1)	TANC1 KIAA1728																									Reverse	Class I	rADNcsPVAEEETTGSAESTLPk	1	N-Term(Dimethyl); C5(Carbamidomethyl); S6(Phospho); K23(Dimethyl)	66	HCD	28	1	2585.14	3	862.385	-1.85	76.59	5351
YFQISQDEDEpSESED	1	Y(1): 0.0; S(5): 0.0; S(11): 100.0; S(13): 0.0	396	Q6P5R6	60S ribosomal protein L22-like 1 OS=Homo sapiens GN=RPL22L1 PE=1 SV=2 - [RL22L_HUMAN]	1	Q6P5R6	S118	60S ribosomal protein L22-like 1	RPL22L1																									Reverse	Class I	yFQISQDEDEsESED	1	N-Term(Dimethyl); S11(Phospho)	79	ETD	5	0	1928.7	3	643.57	0.22	70.96	5427
AGEEDEGEEDpSDSDYEISAK	1	S(11): 100.0; S(13): 0.0; Y(15): 0.0; S(18): 0.0	396	A2RRP1	Neuroblastoma-amplified gene protein OS=Homo sapiens GN=NAG PE=1 SV=1 - [NAG_HUMAN]	1	A2RRP1	S473	Neuroblastoma-amplified sequence (Neuroblastoma-amplified gene protein)	NBAS NAG																									Reverse	Class I	aGEEDEGEEDsDSDYEISAk	1	N-Term(Dimethyl); S11(Phospho); K20(Dimethyl)	87	HCD	13	0	2310.87	3	770.961	0.83	74.78	5497
RMpSDEFVDSFKK	1	S(3): 100.0; S(9): 0.0	396	Q92934	Bcl2 antagonist of cell death OS=Homo sapiens GN=BAD PE=1 SV=3 - [BAD_HUMAN]	1	Q92934	S118	Bcl2 antagonist of cell death (BAD) (Bcl-2-binding component 6) (Bcl-2-like protein 8) (Bcl2-L-8) (Bcl-XL/Bcl-2-associated death promoter)	BAD BBC6 BCL2L8																									Reverse	Class I	rmsDEFVDSFkk	1	N-Term(Dimethyl); M2(Oxidation); S3(Phospho); K11(Dimethyl); K12(Dimethyl)	66	ETD	32	2	1668.77	3	556.928	-1.03	98.09	5607
KEEpSEEpSDDDMGFGLFD	2	S(4): 100.0; S(7): 100.0	396	P05386;P05387	60S acidic ribosomal protein P1 OS=Homo sapiens GN=RPLP1 PE=1 SV=1 - [RLA1_HUMAN]|60S acidic ribosomal protein P2 OS=Homo sapiens GN=RPLP2 PE=1 SV=1 - [RLA2_HUMAN]	2	P05386	S101, S104	60S acidic ribosomal protein P1	RPLP1 RRP1	P05387	S102, S105	60S acidic ribosomal protein P2 (Renal carcinoma antigen NY-REN-44)	RPLP2 D11S2243E RPP2																					Reverse	Class I	kEEsEEsDDDMGFGLFD	1	K1(Dimethyl); N-Term(Dimethyl); S4(Phospho); S7(Phospho)	91	ETD	7	1	2165.76	3	722.591	1.24	99.76	6979
LTQYHGGpSLPNVSQLR	1	T(2): 0.0; Y(4): 0.0; S(8): 100.0; S(13): 0.0	396	Q6UUV7	CREB-regulated transcription coactivator 3 OS=Homo sapiens GN=CRTC3 PE=1 SV=2 - [CRTC3_HUMAN]	1	Q6UUV7	S62	CREB-regulated transcription coactivator 3 (Transducer of regulated cAMP response element-binding protein 3) (TORC-3) (Transducer of CREB protein 3)	CRTC3 TORC3																									Reverse	Class I	lTQYHGGsLPNVSQLR	1	N-Term(Dimethyl:2H(4)); S8(Phospho)	75	ETD	28	0	1881.95	3	627.987	-3.49	115.4	7645
SISSpSNPDLAVAPGSVDDEVSR	1	S(1): 0.0; S(3): 0.0; S(4): 0.3; S(5): 99.7; S(15): 0.0; S(21): 0.0	396	Q96HP0	Dedicator of cytokinesis protein 6 OS=Homo sapiens GN=DOCK6 PE=1 SV=2 - [DOCK6_HUMAN]	1	Q96HP0	S884	Dedicator of cytokinesis protein 6	DOCK6 KIAA1395																									Reverse	Class I	sISSsNPDLAVAPGSVDDEVSR	1	N-Term(Dimethyl:2H(4)); S5(Phospho)	109	HCD	13	0	2314.08	2	1157.54	1.2	113.86	8357
VELQELNDRFANpYIDK	1	Y(13): 100.0	396	P08670	Vimentin OS=Homo sapiens GN=VIM PE=1 SV=4 - [VIME_HUMAN]	1	P08670	Y117	Vimentin	VIM																									Reverse	Class I	vELQELNDRFANyIDk	1	N-Term(Dimethyl); Y13(Phospho); K16(Dimethyl)	91	ETD	28	1	2103.01	3	701.676	-1.56	140.31	9107
SSSISEEKGDpSDDEKPR	1	S(1): 0.0; S(2): 0.0; S(3): 0.0; S(5): 0.0; S(11): 100.0	395	Q9UKV3	Apoptotic chromatin condensation inducer in the nucleus OS=Homo sapiens GN=ACIN1 PE=1 SV=1 - [ACINU_HUMAN]	1	Q9UKV3	S216	Apoptotic chromatin condensation inducer in the nucleus (Acinus)	ACIN1 ACINUS KIAA0670																									Reverse	Class I	sSSISEEkGDsDDEkPR	1	N-Term(Dimethyl:2H(4)); K8(Dimethyl:2H(4)); S11(Phospho); K15(Dimethyl:2H(4))	84	ETD	31	1	2041.96	3	681.324	-6.5	27.9	1902
GHYEVTGpSDDETGK	1	Y(3): 0.0; T(6): 0.0; S(8): 100.0; T(12): 0.0	395	Q09666	Neuroblast differentiation-associated protein AHNAK OS=Homo sapiens GN=AHNAK PE=1 SV=2 - [AHNK_HUMAN]	1	Q09666	S5841	Neuroblast differentiation-associated protein AHNAK (Desmoyokin)	AHNAK PM227																									Reverse	Class I	gHYEVTGsDDETGk	1	N-Term(Dimethyl:2H(4)); S8(Phospho); K14(Dimethyl:2H(4))	88	ETD	29	0	1638.7	3	546.906	-6.91	38.85	2582
EREVDEDpSEPEREVR	1	S(8): 100.0	395	Q53GS9	U4/U6.U5 tri-snRNP-associated protein 2 OS=Homo sapiens GN=USP39 PE=1 SV=2 - [SNUT2_HUMAN]	1	Q53GS9	S82	U4/U6.U5 tri-snRNP-associated protein 2 (Inactive ubiquitin-specific peptidase 39) (SAD1 homolog) (U4/U6.U5 tri-snRNP-associated 65 kDa protein) (65K)	USP39 CGI-21 HSPC332 PRO2855																									Reverse	Class I	eREVDEDsEPEREVR	1	N-Term(Dimethyl); S8(Phospho)	71	ETD	33	2	1981.85	3	661.288	-0.97	44.16	2984
EKLQEEGGGpSDEEETGSPSEDGMQSAR	1	S(10): 100.0; T(15): 0.0; S(17): 0.0; S(19): 0.0; S(25): 0.0	395	Q13610	Periodic tryptophan protein 1 homolog OS=Homo sapiens GN=PWP1 PE=1 SV=1 - [PWP1_HUMAN]	1	Q13610	S50	Periodic tryptophan protein 1 homolog (Keratinocyte protein IEF SSP 9502)	PWP1																									Reverse	Class I	ekLQEEGGGsDEEETGSPSEDGmQSAR	1	N-Term(Dimethyl:2H(4)); K2(Dimethyl:2H(4)); S10(Phospho); M23(Oxidation)	71	HCD	28	1	2999.26	3	1000.43	2.09	50.24	3792
VISSIEQKTpSADGNEK	1	S(3): 0.0; S(4): 0.0; T(9): 0.0; S(10): 100.0	395	P61981	14-3-3 protein gamma OS=Homo sapiens GN=YWHAG PE=1 SV=2 - [1433G_HUMAN]	1	P61981	S71	14-3-3 protein gamma (Protein kinase C inhibitor protein 1) (KCIP-1) [Cleaved into: 14-3-3 protein gamma, N-terminally processed]	YWHAG																									Reverse	Class I	vISSIEQkTsADGNEk	1	N-Term(Dimethyl:2H(4)); K8(Dimethyl:2H(4)); S10(Phospho); K16(Dimethyl:2H(4))	87	ETD	28	1	1881.99	3	628.002	-2.84	53.89	3817
THpSTSSSLGSGESPFSR	1	T(1): 0.0; S(3): 100.0; T(4): 0.0; S(5): 0.0; S(6): 0.0; S(7): 0.0; S(10): 0.0; S(13): 0.0; S(16): 0.0	395	Q9UGV2	Protein NDRG3 OS=Homo sapiens GN=NDRG3 PE=2 SV=2 - [NDRG3_HUMAN]	1	Q9UGV2	S331	Protein NDRG3 (N-myc downstream-regulated gene 3 protein)	NDRG3																									Reverse	Class I	tHsTSSSLGSGESPFSR	1	N-Term(Dimethyl); S3(Phospho)	110	ETD	28	0	1831.78	3	611.265	-2.34	84.73	5831
STAQQELDGKPApSPTPVIVASHTANK	1	S(1): 0.0; T(2): 0.0; S(13): 99.5; T(15): 0.5; S(21): 0.0; T(23): 0.0	395	P35606	Coatomer subunit beta' OS=Homo sapiens GN=COPB2 PE=1 SV=2 - [COPB2_HUMAN]	1	P35606	S859	Coatomer subunit beta' (Beta'-coat protein) (Beta'-COP) (p102)	COPB2																									Reverse	Class I	sTAQQELDGkPAsPTPVIVASHTANk	1	N-Term(Dimethyl); K10(Dimethyl); S13(Phospho); K26(Dimethyl)	93	HCD	30	0	2811.42	2	1406.22	-2.06	89.18	5916
QGSRQDpSWEVVEGLR	1	S(3): 0.0; S(7): 100.0	395	Q9H4L5	Oxysterol-binding protein-related protein 3 OS=Homo sapiens GN=OSBPL3 PE=1 SV=1 - [OSBL3_HUMAN]	1	Q9H4L5	S34	Oxysterol-binding protein-related protein 3 (ORP-3) (OSBP-related protein 3)	OSBPL3 KIAA0704 ORP3 OSBP3																									Reverse	Class I	qGSRQDsWEVVEGLR	1	N-Term(Dimethyl); S7(Phospho)	76	ETD	29	1	1853.85	3	618.622	-2.29	119.16	6941
TPLGApSLDEQSSSTLK	1	T(1): 0.0; S(6): 100.0; S(11): 0.0; S(12): 0.0; S(13): 0.0; T(14): 0.0	395	P28290	Sperm-specific antigen 2 OS=Homo sapiens GN=SSFA2 PE=1 SV=3 - [SSFA2_HUMAN]	1	P28290	S92	Sperm-specific antigen 2 (Cleavage signal-1 protein) (CS-1) (Ki-ras-induced actin-interacting protein)	SSFA2 CS1 KIAA1927 KRAP																									Reverse	Class I	tPLGAsLDEQSSSTLk	1	N-Term(Dimethyl:2H(4)); S6(Phospho); K16(Dimethyl:2H(4))	77	ETD	14	0	1777.91	3	593.307	0.34	100.43	7697
AFQLEEGEEpTEPDCK	1	T(10): 100.0	395	P38432	Coilin OS=Homo sapiens GN=COIL PE=1 SV=1 - [P80C_HUMAN]	1	P38432	T122	Coilin (p80)	COIL CLN80																									Reverse	Class I	aFQLEEGEEtEPDck	1	N-Term(Dimethyl); T10(Phospho); C14(Carbamidomethyl); K15(Dimethyl)	98	ETD	14	0	1917.78	3	639.932	-0.52	102.53	7858
NRPDYVpSEEEEDDEDFETAVK	1	Y(5): 0.0; S(7): 100.0; T(18): 0.0	395	P49792	E3 SUMO-protein ligase RanBP2 OS=Homo sapiens GN=RANBP2 PE=1 SV=2 - [RBP2_HUMAN]	1	P49792	S2668	E3 SUMO-protein ligase RanBP2 (EC 6.3.2.-) (358 kDa nucleoporin) (Nuclear pore complex protein Nup358) (Nucleoporin Nup358) (Ran-binding protein 2) (RanBP2) (p270) [Includes: Putative peptidyl-prolyl cis-trans isomerase (PPIase) (EC 5.2.1.8) (Rotamase)]	RANBP2 NUP358																									Reverse	Class I	nRPDYVsEEEEDDEDFETAVk	1	N-Term(Dimethyl:2H(4)); S7(Phospho); K21(Dimethyl:2H(4))	90	HCD	28	0	2660.13	3	887.383	-1.39	119.98	7903
pSKSPPKVPIVIQDDSLPAGPPPQIR	1	S(1): 99.4; S(3): 0.6; S(15): 0.0	395	Q7Z422	UPF0485 protein C1orf144 OS=Homo sapiens GN=C1orf144 PE=1 SV=1 - [CA144_HUMAN]	1	Q7Z422	S37	UPF0485 protein C1orf144 (Putative MAPK-activating protein PM18/PM20/PM22)	C1orf144																									Reverse	Class I	skSPPkVPIVIQDDSLPAGPPPQIR	1	N-Term(Dimethyl); S1(Phospho); K2(Dimethyl); K6(Dimethyl)	77	HCD	30	2	2800.53	3	934.181	-3.68	131.63	8070
QASASYDpSEEEEEGLPMSYDEK	1	S(3): 0.0; S(5): 0.0; Y(6): 0.0; S(8): 100.0; S(18): 0.0; Y(19): 0.0	395	Q15059	Bromodomain-containing protein 3 OS=Homo sapiens GN=BRD3 PE=1 SV=1 - [BRD3_HUMAN]	1	Q15059	S563	Bromodomain-containing protein 3 (RING3-like protein)	BRD3 KIAA0043 RING3L																									Reverse	Class I	qASASYDsEEEEEGLPmSYDEk	1	N-Term(Dimethyl:2H(4)); S8(Phospho); M17(Oxidation); K22(Dimethyl:2H(4))	47	HCD	13	0	2654.08	3	885.365	-0.88	101.85	8093
SANGGSEpSDGEENIGWSTVNLDEEK	1	S(1): 0.0; S(6): 0.0; S(8): 100.0; S(17): 0.0; T(18): 0.0	394	O43290	U4/U6.U5 tri-snRNP-associated protein 1 OS=Homo sapiens GN=SART1 PE=1 SV=1 - [SNUT1_HUMAN]	1	O43290	S598	U4/U6.U5 tri-snRNP-associated protein 1 (SNU66 homolog) (hSnu66) (Squamous cell carcinoma antigen recognized by T-cells 1) (SART-1) (hSART-1) (U4/U6.U5 tri-snRNP-associated 110 kDa protein) (allergen Hom s 1)	SART1																									Reverse	Class I	sANGGSEsDGEENIGWSTVNLDEEk	1	N-Term(Dimethyl:2H(4)); S8(Phospho); K25(Dimethyl:2H(4))	81	HCD	13	0	2768.2	3	923.406	0.48	139.45	11256
AAQQAASSSGQGQQAQpTPTGK	1	S(7): 0.0; S(8): 0.0; S(9): 0.0; T(17): 100.0; T(19): 0.0	394	P48729	Casein kinase I isoform alpha OS=Homo sapiens GN=CSNK1A1 PE=1 SV=2 - [KC1A_HUMAN]	1	P48729	T321	Casein kinase I isoform alpha (CKI-alpha) (EC 2.7.11.1) (CK1)	CSNK1A1																									Reverse	Class I	aAQQAASSSGQGQQAQtPTGk	1	N-Term(Dimethyl:2H(4)); T17(Phospho); K21(Dimethyl:2H(4))	106	ETD	14	0	2146.04	3	716.017	-0.36	26.32	1953
KFDHESpSPGTDEDK	1	S(6): 0.0; S(7): 100.0; T(10): 0.0	394	Q13427	Peptidyl-prolyl cis-trans isomerase G OS=Homo sapiens GN=PPIG PE=1 SV=1 - [PPIG_HUMAN]	1	Q13427	S745	Peptidyl-prolyl cis-trans isomerase G (PPIase G) (Peptidyl-prolyl isomerase G) (EC 5.2.1.8) (CASP10) (Clk-associating RS-cyclophilin) (CARS-Cyp) (CARS-cyclophilin) (SR-cyclophilin) (SR-cyp) (SRcyp) (Cyclophilin G) (Rotamase G)	PPIG																									Reverse	Class I	kFDHESsPGTDEDk	1	N-Term(Dimethyl); K1(Dimethyl); S7(Phospho); K14(Dimethyl)	72	ETD	33	1	1755.75	3	585.921	-0.19	33.25	2380
KVELpSEpSEEDKGGK	2	S(5): 100.0; S(7): 100.0	394	Q8IYB3	Serine/arginine repetitive matrix protein 1 OS=Homo sapiens GN=SRRM1 PE=1 SV=2 - [SRRM1_HUMAN]	1	Q8IYB3	S463, S465	Serine/arginine repetitive matrix protein 1 (SR-related nuclear matrix protein of 160 kDa) (SRm160) (Ser/Arg-related nuclear matrix protein)	SRRM1 SRM160																									Reverse	Class I	kVELsEsEEDkGGk	1	N-Term(Dimethyl:2H(4)); K1(Dimethyl:2H(4)); S5(Phospho); S7(Phospho); K11(Dimethyl:2H(4)); K14(Dimethyl:2H(4))	74	ETD	29	2	1822.92	3	608.31	-0.84	44.36	3192
RGILHTDSQSQpSLR	1	T(6): 0.0; S(8): 0.0; S(10): 0.0; S(12): 100.0	394	Q15678	Tyrosine-protein phosphatase non-receptor type 14 OS=Homo sapiens GN=PTPN14 PE=1 SV=1 - [PTN14_HUMAN]	1	Q15678	S465	Tyrosine-protein phosphatase non-receptor type 14 (EC 3.1.3.48) (Protein-tyrosine phosphatase pez)	PTPN14 PEZ																									Reverse	Class I	rGILHTDSQSQsLR	1	N-Term(Dimethyl); S12(Phospho)	78	ETD	35	1	1705.84	3	569.284	0.1	53.1	3455
ILEGDNGMDpSDMEEEADDGSK	1	S(10): 100.0; S(20): 0.0	394	Q9H8G2	Uncharacterized protein C9orf82 OS=Homo sapiens GN=C9orf82 PE=1 SV=2 - [CI082_HUMAN]	1	Q9H8G2	S203	Caspase activity and apoptosis inhibitor 1 (Conserved anti-apoptotic protein) (CAAP)	CAAP1 C9orf82 CAAP																									Reverse	Class I	iLEGDNGmDsDmEEEADDGSk	1	N-Term(Dimethyl); M8(Oxidation); S10(Phospho); M12(Oxidation); K21(Dimethyl)	93	HCD	13	0	2424.9	2	1212.95	1.29	54.96	3953
EVIDASDKEGMpSPAK	1	S(6): 0.0; S(12): 100.0	394	Q13523	Serine/threonine-protein kinase PRP4 homolog OS=Homo sapiens GN=PRPF4B PE=1 SV=2 - [PRP4B_HUMAN]	1	Q13523	S93	Serine/threonine-protein kinase PRP4 homolog (EC 2.7.11.1) (PRP4 kinase) (PRP4 pre-mRNA-processing factor 4 homolog)	PRPF4B KIAA0536 PRP4 PRP4H PRP4K																									Reverse	Class I	eVIDASDkEGMsPAk	1	N-Term(Dimethyl); K8(Dimethyl); S12(Phospho); K15(Dimethyl)	108	ETD	27	1	1740.81	3	580.94	-4.23	58.3	3953
QApSEQNWANYpSAEQNR	2	S(3): 100.0; Y(10): 0.0; S(11): 100.0	394	P17302	Gap junction alpha-1 protein OS=Homo sapiens GN=GJA1 PE=1 SV=2 - [CXA1_HUMAN]	1	P17302	S306, S314	Gap junction alpha-1 protein (Connexin-43) (Cx43) (Gap junction 43 kDa heart protein)	GJA1 GJAL																									Reverse	Class I	qAsEQNWANYsAEQNR	1	N-Term(Dimethyl); S3(Phospho); S11(Phospho)	67	ETD	7	0	2083.79	3	695.268	-1.04	60.52	4205
SLASKDVEpSPSWR	1	S(1): 0.0; S(4): 0.0; S(9): 100.0; S(11): 0.0	394	O00159	Myosin-Ic OS=Homo sapiens GN=MYO1C PE=1 SV=2 - [MYO1C_HUMAN]	1	O00159	S373	Unconventional myosin-Ic (Myosin I beta) (MMI-beta) (MMIb)	MYO1C																									Reverse	Class I	sLASkDVEsPSWR	1	N-Term(Dimethyl); K5(Dimethyl); S9(Phospho)	67	ETD	29	1	1597.75	3	533.254	-10.12	80.84	4911
SIpSNEGLTLNNSHVSK	1	S(1): 0.1; S(3): 99.9; T(8): 0.0; S(12): 0.0; S(15): 0.0	394	Q08AD1	Calmodulin-regulated spectrin-associated protein 1-like protein 1 OS=Homo sapiens GN=CAMSAP1L1 PE=1 SV=2 - [CA1L1_HUMAN]	1	Q08AD1	S464	Calmodulin-regulated spectrin-associated protein 2 (Calmodulin-regulated spectrin-associated protein 1-like protein 1)	CAMSAP2 CAMSAP1L1 KIAA1078																									Reverse	Class I	sIsNEGLTLNNSHVSk	1	N-Term(Dimethyl:2H(4)); S3(Phospho); K16(Dimethyl:2H(4))	95	ETD	28	0	1843.94	3	615.317	-2.58	91.08	6211
RNpTIDSTSSFSQFR	1	T(3): 100.0; S(6): 0.0; T(7): 0.0; S(8): 0.0; S(9): 0.0; S(11): 0.0	394	Q8TDN4	CDK5 and ABL1 enzyme substrate 1 OS=Homo sapiens GN=CABLES1 PE=1 SV=2 - [CABL1_HUMAN]	1	Q8TDN4	T415	CDK5 and ABL1 enzyme substrate 1 (Interactor with CDK3 1) (Ik3-1)	CABLES1 CABLES																									Reverse	Class I	rNtIDSTSSFSQFR	1	N-Term(Dimethyl); T3(Phospho)	91	ETD	29	1	1753.79	3	585.269	0.83	100.43	6776
TApSISSSPSEGTPTVGSYGCTPQSLPK	1	T(1): 0.7; S(3): 99.3; S(5): 0.0; S(6): 0.0; S(7): 0.0; S(9): 0.0; T(12): 0.0; T(14): 0.0; S(17): 0.0; Y(18): 0.0; T(21): 0.0; S(24): 0.0	394	Q6PKG0	La-related protein 1 OS=Homo sapiens GN=LARP1 PE=1 SV=2 - [LARP1_HUMAN]	1	Q6PKG0	S847	La-related protein 1 (La ribonucleoprotein domain family member 1)	LARP1 KIAA0731 LARP																									Reverse	Class I	tAsISSSPSEGTPTVGSYGcTPQSLPk	1	N-Term(Dimethyl); S3(Phospho); C20(Carbamidomethyl); K27(Dimethyl)	73	HCD	13	0	2832.31	3	944.774	1.81	109.17	8039
FLEDDTpSDPTYTSALGGK	1	T(6): 0.0; S(7): 100.0; T(10): 0.0; Y(11): 0.0; T(12): 0.0; S(13): 0.0	394	P29323	Ephrin type-B receptor 2 OS=Homo sapiens GN=EPHB2 PE=1 SV=5 - [EPHB2_HUMAN]	1	P29323	S776	Ephrin type-B receptor 2 (EC 2.7.10.1) (Developmentally-regulated Eph-related tyrosine kinase) (ELK-related tyrosine kinase) (EPH tyrosine kinase 3) (EPH-like kinase 5) (EK5) (hEK5) (Renal carcinoma antigen NY-REN-47) (Tyrosine-protein kinase TYRO5) (Tyrosine-protein kinase receptor EPH-3)	EPHB2 DRT EPHT3 EPTH3 ERK HEK5 TYRO5																									Reverse	Class I	fLEDDTsDPTYTSALGGk	1	N-Term(Dimethyl:2H(4)); S7(Phospho); K18(Dimethyl:2H(4))	75	ETD	13	0	2060.96	3	687.657	0.3	129.1	9418
EGTQASEGYFSQpSQEEEFAQSEELCAK	1	T(3): 0.0; S(6): 0.0; Y(9): 0.0; S(11): 0.0; S(13): 100.0; S(21): 0.0	393	Q16643	Drebrin OS=Homo sapiens GN=DBN1 PE=1 SV=3 - [DREB_HUMAN]	1	Q16643	S601	Drebrin (Developmentally-regulated brain protein)	DBN1 D0S117E																									Reverse	Class I	eGTQASEGYFSQsQEEEFAQSEELcAk	1	N-Term(Dimethyl); S13(Phospho); C25(Carbamidomethyl); K27(Dimethyl)	100	HCD	13	0	3205.32	3	1069.11	0.97	137.47	10029
QSETVDQNpSDSDEMLAILK	1	S(2): 0.0; T(4): 0.0; S(9): 100.0; S(11): 0.0	393	P46100	Transcriptional regulator ATRX OS=Homo sapiens GN=ATRX PE=1 SV=3 - [ATRX_HUMAN]	1	P46100	S729	Transcriptional regulator ATRX (EC 3.6.4.12) (ATP-dependent helicase ATRX) (X-linked helicase II) (X-linked nuclear protein) (XNP) (Znf-HX)	ATRX RAD54L XH2																									Reverse	Class I	qSETVDQNsDSDEMLAILk	1	N-Term(Dimethyl); S9(Phospho); K19(Dimethyl)	64	HCD	13	0	2259.01	3	753.674	-0.59	144.79	10605
KGpSSGNASEVSVACLTER	1	S(3): 100.0; S(4): 0.0; S(8): 0.0; S(11): 0.0; T(16): 0.0	393	Q69YQ0	Cytospin-A OS=Homo sapiens GN=SPECC1L PE=1 SV=1 - [CYTSA_HUMAN]	1	Q69YQ0	S384	Cytospin-A (Renal carcinoma antigen NY-REN-22) (Sperm antigen with calponin homology and coiled-coil domains 1-like) (SPECC1-like protein)	SPECC1L CYTSA KIAA0376																									Reverse	Class I	kGsSGNASEVSVAcLTER	1	K1(Dimethyl); N-Term(Dimethyl); S3(Phospho); C14(Carbamidomethyl)	93	ETD	28	1	1987.92	3	663.31	-0.14	96.19	6535
RDpSFIGTPYWMAPEVVMCETSK	1	S(3): 100.0; T(7): 0.0; Y(9): 0.0; T(20): 0.0; S(21): 0.0	392	Q9H2G2	STE20-like serine/threonine-protein kinase OS=Homo sapiens GN=SLK PE=1 SV=1 - [SLK_HUMAN]	1	Q9H2G2	S189	STE20-like serine/threonine-protein kinase (STE20-like kinase) (hSLK) (EC 2.7.11.1) (CTCL tumor antigen se20-9) (STE20-related serine/threonine-protein kinase) (STE20-related kinase) (Serine/threonine-protein kinase 2)	SLK KIAA0204 STK2																									Reverse	Class I	rDsFIGTPYWmAPEVVMcETSk	1	N-Term(Dimethyl); S3(Phospho); M11(Oxidation); C18(Carbamidomethyl); K22(Dimethyl)	53	HCD	27	1	2756.23	3	919.413	2.96	147.62	12707
SKGHYEVTGpSDDETGK	1	S(1): 0.0; Y(5): 0.0; T(8): 2.5; S(10): 97.5; T(14): 0.0	392	Q09666	Neuroblast differentiation-associated protein AHNAK OS=Homo sapiens GN=AHNAK PE=1 SV=2 - [AHNK_HUMAN]	1	Q09666	S5841	Neuroblast differentiation-associated protein AHNAK (Desmoyokin)	AHNAK PM227																									Reverse	Class I	skGHYEVTGsDDETGk	1	N-Term(Dimethyl:2H(4)); K2(Dimethyl:2H(4)); S10(Phospho); K16(Dimethyl:2H(4))	88	ETD	33	1	1885.9	3	629.304	-0.47	37.89	2636
ERAMpSTTSISSPQPGK	1	S(5): 100.0; T(6): 0.0; T(7): 0.0; S(8): 0.0; S(10): 0.0; S(11): 0.0	392	Q9UJU6	Drebrin-like protein OS=Homo sapiens GN=DBNL PE=1 SV=1 - [DBNL_HUMAN]	1	Q9UJU6	S269	Drebrin-like protein (Cervical SH3P7) (Cervical mucin-associated protein) (Drebrin-F) (HPK1-interacting protein of 55 kDa) (HIP-55) (SH3 domain-containing protein 7)	DBNL CMAP SH3P7 PP5423																									Reverse	Class I	eRAmsTTSISSPQPGk	1	N-Term(Dimethyl:2H(4)); M4(Oxidation); S5(Phospho); K16(Dimethyl:2H(4))	98	ETD	28	1	1836.9	3	612.97	-2.86	42.39	3056
KKGDDpSDEEDLCISNK	1	S(6): 100.0; S(14): 0.0	392	Q9Y3M8	StAR-related lipid transfer protein 13 OS=Homo sapiens GN=STARD13 PE=1 SV=2 - [STA13_HUMAN]	1	Q9Y3M8	S133	StAR-related lipid transfer protein 13 (46H23.2) (Deleted in liver cancer 2 protein) (DLC-2) (Rho GTPase-activating protein) (START domain-containing protein 13) (StARD13)	STARD13 DLC2 GT650																									Reverse	Class I	kkGDDsDEEDLcISNk	1	N-Term(Dimethyl); K1(Dimethyl); K2(Dimethyl); S6(Phospho); C12(Carbamidomethyl); K16(Dimethyl)	81	ETD	32	2	2044.91	3	682.31	-0.19	61.5	3774
SSWLSTEGGRDSAQpSPK	1	S(1): 0.0; S(2): 0.0; S(5): 0.0; T(6): 0.0; S(12): 0.0; S(15): 100.0	392	Q9BXF6	Rab11 family-interacting protein 5 OS=Homo sapiens GN=RAB11FIP5 PE=1 SV=1 - [RFIP5_HUMAN]	1	Q9BXF6	S296	Rab11 family-interacting protein 5 (Rab11-FIP5) (Gamma-SNAP-associated factor 1) (Gaf-1) (Phosphoprotein pp75) (Rab11-interacting protein Rip11)	RAB11FIP5 GAF1 KIAA0857 RIP11																									Reverse	Class I	sSWLSTEGGRDSAQsPk	1	N-Term(Dimethyl:2H(4)); S15(Phospho); K17(Dimethyl:2H(4))	83	ETD	29	1	1936.91	3	646.309	-6.49	78.21	4776
DGEMDRNFDpTLDLPK	1	T(10): 100.0	392	O00192	Armadillo repeat protein deleted in velo-cardio-facial syndrome OS=Homo sapiens GN=ARVCF PE=1 SV=1 - [ARVC_HUMAN]	1	O00192	T642	Armadillo repeat protein deleted in velo-cardio-facial syndrome	ARVCF																									Reverse	Class I	dGEmDRNFDtLDLPk	1	N-Term(Dimethyl); M4(Oxidation); T10(Phospho); K15(Dimethyl)	83	ETD	27	1	1917.81	3	639.943	-8.64	118.42	7619
ASpTFCGTPDYIAPEILQGLK	1	S(2): 0.4; T(3): 99.6; T(7): 0.0; Y(10): 0.0	391	Q05655	Protein kinase C delta type OS=Homo sapiens GN=PRKCD PE=1 SV=2 - [KPCD_HUMAN]	1	Q05655	T507	Protein kinase C delta type (EC 2.7.11.13) (Tyrosine-protein kinase PRKCD) (EC 2.7.10.2) (nPKC-delta)	PRKCD																									Reverse	Class I	aStFcGTPDYIAPEILQGLk	1	N-Term(Dimethyl); T3(Phospho); C5(Carbamidomethyl); K20(Dimethyl)	54	HCD	13	0	2317.12	3	773.045	0.28	150.25	10987
EVDPSTGELQSLQMPESEGPSpSLDPSQEGPTGLK	1	S(5): 0.0; T(6): 0.0; S(11): 0.0; S(17): 0.0; S(21): 0.9; S(22): 99.1; S(26): 0.0; T(31): 0.0	391	Q13501	Sequestosome-1 OS=Homo sapiens GN=SQSTM1 PE=1 SV=1 - [SQSTM_HUMAN]	1	Q13501	S366	Sequestosome-1 (EBI3-associated protein of 60 kDa) (EBIAP) (p60) (Phosphotyrosine-independent ligand for the Lck SH2 domain of 62 kDa) (Ubiquitin-binding protein p62)	SQSTM1 ORCA OSIL																									Reverse	Class I	eVDPSTGELQSLQmPESEGPSsLDPSQEGPTGLk	1	N-Term(Dimethyl); M14(Oxidation); S22(Phospho); K34(Dimethyl)	76	HCD	13	0	3678.66	3	1226.89	-0.21	136.94	11028
RPLpSSSHEASEGQAK	1	S(4): 100.0; S(5): 0.0; S(6): 0.0; S(10): 0.0	391	Q8IZ21	Phosphatase and actin regulator 4 OS=Homo sapiens GN=PHACTR4 PE=1 SV=1 - [PHAR4_HUMAN]	1	Q8IZ21	S176	Phosphatase and actin regulator 4	PHACTR4 PRO2963																									Reverse	Class I	rPLsSSHEASEGQAk	1	N-Term(Dimethyl); S4(Phospho); K15(Dimethyl)	101	ETD	32	0	1719.81	3	573.94	-0.55	25.21	1933
IDASKNEEDEGHSNSpSPR	1	S(4): 0.0; S(13): 0.0; S(15): 0.0; S(16): 100.0	391	Q14103	Heterogeneous nuclear ribonucleoprotein D0 OS=Homo sapiens GN=HNRNPD PE=1 SV=1 - [HNRPD_HUMAN]	1	Q14103	S83	Heterogeneous nuclear ribonucleoprotein D0 (hnRNP D0) (AU-rich element RNA-binding protein 1)	HNRNPD AUF1 HNRPD																									Reverse	Class I	iDASkNEEDEGHSNSsPR	1	N-Term(Dimethyl); K5(Dimethyl); S16(Phospho)	82	ETD	32	1	2107.89	3	703.302	-0.24	26.06	1977
LKEGHETPMDIDpSDDSK	1	T(7): 0.0; S(13): 100.0; S(16): 0.0	391	Q8TDB6	Protein deltex-3-like OS=Homo sapiens GN=DTX3L PE=1 SV=1 - [DTX3L_HUMAN]	1	Q8TDB6	S532	E3 ubiquitin-protein ligase DTX3L (EC 6.3.2.-) (B-lymphoma- and BAL-associated protein) (Protein deltex-3-like) (Rhysin-2) (Rhysin2)	DTX3L BBAP																									Reverse	Class I	lkEGHETPmDIDsDDSk	1	N-Term(Dimethyl:2H(4)); K2(Dimethyl:2H(4)); M9(Oxidation); S13(Phospho); K17(Dimethyl:2H(4))	69	ETD	32	1	2108.98	3	703.666	-0.7	41.7	2860
HPASLTSSGSSGpSPSSSIK	1	S(4): 0.0; T(6): 0.0; S(7): 0.0; S(8): 0.0; S(10): 0.0; S(11): 0.0; S(13): 100.0; S(15): 0.0; S(16): 0.0; S(17): 0.0	391	Q9C0D5	Protein TANC1 OS=Homo sapiens GN=TANC1 PE=1 SV=2 - [TANC1_HUMAN]	1	Q9C0D5	S1668	Protein TANC1 (Tetratricopeptide repeat, ankyrin repeat and coiled-coil domain-containing protein 1)	TANC1 KIAA1728																									Reverse	Class I	hPASLTSSGSSGsPSSSIk	1	N-Term(Dimethyl:2H(4)); S13(Phospho); K19(Dimethyl:2H(4))	98	ETD	29	0	1917.94	3	639.984	-0.94	48.11	3444
IKIEHAPpSPSSGGTLK	1	S(8): 100.0; S(10): 0.0; S(11): 0.0; T(14): 0.0	391	Q14004	Cell division cycle 2-like protein kinase 5 OS=Homo sapiens GN=CDC2L5 PE=1 SV=2 - [CD2L5_HUMAN]	1	Q14004	S525	Cyclin-dependent kinase 13 (EC 2.7.11.22) (EC 2.7.11.23) (CDC2-related protein kinase 5) (Cell division cycle 2-like protein kinase 5) (Cell division protein kinase 13) (hCDK13) (Cholinesterase-related cell division controller)	CDK13 CDC2L CDC2L5 CHED KIAA1791																									Reverse	Class I	ikIEHAPsPSSGGTLk	1	N-Term(Dimethyl); K2(Dimethyl); S8(Phospho); K16(Dimethyl)	89	ETD	32	1	1785.95	3	595.989	1.39	65.38	4180
HVVLGAIENKVEpSK	1	S(13): 100.0	391	P41227	N-terminal acetyltransferase complex ARD1 subunit homolog A OS=Homo sapiens GN=ARD1A PE=1 SV=1 - [ARD1A_HUMAN]	1	P41227	S182	N-alpha-acetyltransferase 10 (EC 2.3.1.-) (EC 2.3.1.88) (N-terminal acetyltransferase complex ARD1 subunit homolog A) (NatA catalytic subunit)	NAA10 ARD1 ARD1A TE2																									Reverse	Class I	hVVLGAIENkVEsk	1	N-Term(Dimethyl); K10(Dimethyl); S13(Phospho); K14(Dimethyl)	84	ETD	32	1	1686.92	3	562.978	0.16	91.14	5260
HYEDGYPGGSDNYGpSLSR	1	Y(2): 0.0; Y(6): 0.0; S(10): 0.0; Y(13): 0.0; S(15): 100.0; S(17): 0.0	391	O60716	Catenin delta-1 OS=Homo sapiens GN=CTNND1 PE=1 SV=1 - [CTND1_HUMAN]	1	O60716	S230	Catenin delta-1 (Cadherin-associated Src substrate) (CAS) (p120 catenin) (p120(ctn)) (p120(cas))	CTNND1 KIAA0384																									Reverse	Class I	hYEDGYPGGSDNYGsLSR	1	N-Term(Dimethyl); S15(Phospho)	79	ETD	30	0	2081.82	3	694.612	-0.47	83.72	5570
KLIDLEpSPTPESQK	1	S(7): 100.0; T(9): 0.0; S(12): 0.0	391	O43166	Signal-induced proliferation-associated 1-like protein 1 OS=Homo sapiens GN=SIPA1L1 PE=1 SV=4 - [SI1L1_HUMAN]	1	O43166	S1549	Signal-induced proliferation-associated 1-like protein 1 (SIPA1-like protein 1) (High-risk human papilloma viruses E6 oncoproteins targeted protein 1) (E6-targeted protein 1)	SIPA1L1 E6TP1 KIAA0440																									Reverse	Class I	kLIDLEsPTPESQk	1	N-Term(Dimethyl:2H(4)); K1(Dimethyl:2H(4)); S7(Phospho); K14(Dimethyl:2H(4))	80	ETD	29	1	1760.98	3	587.666	-0.76	96.44	6527
RApSQEANLLTLAQK	1	S(3): 100.0; T(10): 0.0	391	Q6PJG2	Uncharacterized protein C14orf43 OS=Homo sapiens GN=C14orf43 PE=1 SV=2 - [CN043_HUMAN]	1	Q6PJG2	S461	Uncharacterized protein C14orf43	C14orf43 C14orf117																									Reverse	Class I	rAsQEANLLTLAQk	1	N-Term(Dimethyl:2H(4)); S3(Phospho); K14(Dimethyl:2H(4))	89	ETD	28	1	1686.94	3	562.983	-2.13	124.1	8137
EKPDpSDDDLDIASLVTAK	1	S(5): 100.0; S(13): 0.0; T(16): 0.0	391	Q86V48	Leucine zipper protein 1 OS=Homo sapiens GN=LUZP1 PE=1 SV=2 - [LUZP1_HUMAN]	1	Q86V48	S659	Leucine zipper protein 1	LUZP1																									Reverse	Class I	ekPDsDDDLDIASLVTAk	1	N-Term(Dimethyl:2H(4)); K2(Dimethyl:2H(4)); S5(Phospho); K18(Dimethyl:2H(4))	108	ETD	27	0	2108.06	3	703.357	-10.78	140.09	9097
DQSpTPIIEVEGPLLSDTHVTFK	1	S(3): 0.5; T(4): 99.5; S(15): 0.0; T(17): 0.0; T(20): 0.0	390	P49116	Nuclear receptor subfamily 2 group C member 2 OS=Homo sapiens GN=NR2C2 PE=1 SV=1 - [NR2C2_HUMAN]	1	P49116	T352	Nuclear receptor subfamily 2 group C member 2 (Orphan nuclear receptor TAK1) (Orphan nuclear receptor TR4) (Testicular receptor 4)	NR2C2 TAK1 TR4																									Reverse	Class I	dQStPIIEVEGPLLSDTHVTFk	1	N-Term(Dimethyl:2H(4)); T4(Phospho); K22(Dimethyl:2H(4))	49	HCD	27	0	2570.32	3	857.446	0.05	153.67	12946
AQLGINEDHpSEGDEKSEK	1	S(10): 100.0; S(16): 0.0	390	Q69YQ0	Cytospin-A OS=Homo sapiens GN=SPECC1L PE=1 SV=1 - [CYTSA_HUMAN]	1	Q69YQ0	S220	Cytospin-A (Renal carcinoma antigen NY-REN-22) (Sperm antigen with calponin homology and coiled-coil domains 1-like) (SPECC1-like protein)	SPECC1L CYTSA KIAA0376																									Reverse	Class I	aQLGINEDHsEGDEkSEk	1	N-Term(Dimethyl:2H(4)); S10(Phospho); K15(Dimethyl:2H(4)); K18(Dimethyl:2H(4))	89	ETD	31	1	2162.03	3	721.35	-2.79	46.53	2907
AVPMAPAPApSPGSSNDSSAR	1	S(10): 100.0; S(13): 0.0; S(14): 0.0; S(17): 0.0; S(18): 0.0	390	Q66K74	Microtubule-associated protein 1S OS=Homo sapiens GN=MAP1S PE=1 SV=2 - [MAP1S_HUMAN]	1	Q66K74	S759	Microtubule-associated protein 1S (MAP-1S) (BPY2-interacting protein 1) (Microtubule-associated protein 8) (Variable charge Y chromosome 2-interacting protein 1) (VCY2-interacting protein 1) (VCY2IP-1) [Cleaved into: MAP1S heavy chain; MAP1S light chain]	MAP1S BPY2IP1 C19orf5 MAP8 VCY2IP1																									Reverse	Class I	aVPmAPAPAsPGSSNDSSAR	1	N-Term(Dimethyl:2H(4)); M4(Oxidation); S10(Phospho)	85	ETD	14	0	1997.9	3	666.637	0.76	58.48	4308
ISVGRLpSPQQESSASSK	1	S(2): 0.0; S(7): 100.0; S(12): 0.0; S(13): 0.0; S(15): 0.0; S(16): 0.0	390	P15822	Zinc finger protein 40 OS=Homo sapiens GN=HIVEP1 PE=1 SV=1 - [ZEP1_HUMAN]	1	P15822	S1734	Zinc finger protein 40 (Cirhin interaction protein) (CIRIP) (Gate keeper of apoptosis-activating protein) (GAAP) (Human immunodeficiency virus type I enhancer-binding protein 1) (HIV-EP1) (Major histocompatibility complex-binding protein 1) (MBP-1) (Positive regulatory domain II-binding factor 1) (PRDII-BF1)	HIVEP1 ZNF40																									Reverse	Class I	iSVGRLsPQQESSASSk	1	N-Term(Dimethyl); S7(Phospho); K17(Dimethyl)	75	ETD	28	1	1896.94	3	632.985	-1.71	74.16	5189
RFpSEGVLQSPSQDQEK	1	S(3): 100.0; S(9): 0.0; S(11): 0.0	390	Q9C0C2	182 kDa tankyrase 1-binding protein OS=Homo sapiens GN=TNKS1BP1 PE=1 SV=3 - [TB182_HUMAN]	1	Q9C0C2	S429	182 kDa tankyrase-1-binding protein	TNKS1BP1 KIAA1741 TAB182																									Reverse	Class I	rFsEGVLQSPSQDQEk	1	N-Term(Dimethyl); S3(Phospho); K16(Dimethyl)	67	HCD	28	1	1970.92	2	985.963	-1.83	91.5	6235
SEpSLIDASEDpSQLEAAIR	2	S(1): 0.0; S(3): 100.0; S(8): 0.0; S(11): 100.0	390	O94888	UBX domain-containing protein 7 OS=Homo sapiens GN=UBXD7 PE=1 SV=2 - [UBXD7_HUMAN]	1	O94888	S280, S288	UBX domain-containing protein 7	UBXN7 KIAA0794 UBXD7																									Reverse	Class I	sEsLIDASEDsQLEAAIR	1	N-Term(Dimethyl); S3(Phospho); S11(Phospho)	101	ETD	6	0	2121.9	3	707.973	2.01	88	6346
GYYSPYSVSGSGpSTAGSR	1	Y(2): 0.0; Y(3): 0.0; S(4): 0.0; Y(6): 0.0; S(7): 0.0; S(9): 0.0; S(11): 0.4; S(13): 99.2; T(14): 0.4; S(17): 0.0	390	Q15149	Plectin-1 OS=Homo sapiens GN=PLEC1 PE=1 SV=2 - [PLEC1_HUMAN]	1	Q15149	S4622	Plectin (PCN) (PLTN) (Hemidesmosomal protein 1) (HD1) (Plectin-1)	PLEC PLEC1																									Reverse	Class I	gYYSPYSVSGSGsTAGSR	1	N-Term(Dimethyl:2H(4)); S13(Phospho)	92	HCD	14	0	1894.83	2	947.917	5.93	100.15	8258
LSpSTDDGYIDLQFK	1	S(2): 0.0; S(3): 100.0; T(4): 0.0; Y(8): 0.0	389	Q96A57	UPF0414 transmembrane protein C20orf30 OS=Homo sapiens GN=C20orf30 PE=2 SV=1 - [CT030_HUMAN]	1	Q96A57	S24	Transmembrane protein 230	TMEM230 C20orf30 HSPC274 UNQ2432/PRO4992																									Reverse	Class I	lSsTDDGYIDLQFk	1	N-Term(Dimethyl); S3(Phospho); K14(Dimethyl)	101	ETD	13	0	1737.8	3	579.938	0.3	141.66	10355
KWDGpSEEDEDNSKK	1	S(5): 100.0; S(12): 0.0	389	O60841	Eukaryotic translation initiation factor 5B OS=Homo sapiens GN=EIF5B PE=1 SV=3 - [IF2P_HUMAN]	1	O60841	S164	Eukaryotic translation initiation factor 5B (eIF-5B) (Translation initiation factor IF-2)	EIF5B IF2 KIAA0741																									Reverse	Class I	kWDGsEEDEDNSkk	1	K1(Dimethyl); N-Term(Dimethyl); S5(Phospho); K13(Dimethyl); K14(Dimethyl)	71	ETD	32	2	1858.81	3	620.274	-1.58	34.81	2461
HAIMRpSPQMVSAIVR	1	S(6): 100.0; S(11): 0.0	389	P35222	Catenin beta-1 OS=Homo sapiens GN=CTNNB1 PE=1 SV=1 - [CTNB1_HUMAN]	1	P35222	S191	Catenin beta-1 (Beta-catenin)	CTNNB1 CTNNB OK/SW-cl.35 PRO2286																									Reverse	Class I	hAImRsPQmVSAIVR	1	N-Term(Dimethyl:2H(4)); M4(Oxidation); S6(Phospho); M9(Oxidation)	80	ETD	33	1	1839.92	3	613.98	-1.68	64.42	4070
LRSADpSENALSVQER	1	S(3): 0.0; S(6): 100.0; S(11): 0.0	389	Q99759	Mitogen-activated protein kinase kinase kinase 3 OS=Homo sapiens GN=MAP3K3 PE=1 SV=2 - [M3K3_HUMAN]	1	Q99759	S340	Mitogen-activated protein kinase kinase kinase 3 (EC 2.7.11.25) (MAPK/ERK kinase kinase 3) (MEK kinase 3) (MEKK 3)	MAP3K3 MAPKKK3 MEKK3																									Reverse	Class I	lRSADsENALSVQER	1	N-Term(Dimethyl); S6(Phospho)	96	ETD	29	1	1782.84	3	594.951	-0.02	64.77	4581
QIpSDGEREELNLTANR	1	S(3): 100.0; T(13): 0.0	389	O95816	BAG family molecular chaperone regulator 2 OS=Homo sapiens GN=BAG2 PE=1 SV=1 - [BAG2_HUMAN]	1	O95816	S73	BAG family molecular chaperone regulator 2 (BAG-2) (Bcl-2-associated athanogene 2)	BAG2																									Reverse	Class I	qIsDGEREELNLTANR	1	N-Term(Dimethyl); S3(Phospho)	82	ETD	28	1	1952.9	3	651.639	-2.02	98.23	6641
FHpYDNTAGISQYLQNSK	1	Y(3): 100.0; T(6): 0.0; S(10): 0.0; Y(12): 0.0; S(16): 0.0	389	P35968	Vascular endothelial growth factor receptor 2 OS=Homo sapiens GN=KDR PE=1 SV=2 - [VGFR2_HUMAN]	1	P35968	Y1214	Vascular endothelial growth factor receptor 2 (VEGFR-2) (EC 2.7.10.1) (Fetal liver kinase 1) (FLK-1) (Kinase insert domain receptor) (KDR) (Protein-tyrosine kinase receptor flk-1) (CD antigen CD309)	KDR FLK1 VEGFR2																									Reverse	Class I	fHyDNTAGISQYLQNSk	1	N-Term(Dimethyl); Y3(Phospho); K17(Dimethyl)	102	ETD	29	0	2121.96	3	707.993	0.2	122.59	8068
STpSFRGGMGSGGLATGIAGGLAGMGGIQNEK	1	S(1): 1.1; T(2): 1.1; S(3): 96.8; S(10): 1.1; T(15): 0.0	389	P05783	Keratin, type I cytoskeletal 18 OS=Homo sapiens GN=KRT18 PE=1 SV=2 - [K1C18_HUMAN]	1	P05783	S53	Keratin, type I cytoskeletal 18 (Cell proliferation-inducing gene 46 protein) (Cytokeratin-18) (CK-18) (Keratin-18) (K18)	KRT18 CYK18 PIG46																									Reverse	Class I	sTsFRGGMGSGGLATGIAGGLAGmGGIQNEk	1	N-Term(Dimethyl:2H(4)); S3(Phospho); M24(Oxidation); K31(Dimethyl:2H(4))	60	HCD	27	1	2999.43	3	1000.48	-8.94	134.68	8622
KNpSLISSLEEEVSILNR	1	S(3): 100.0; S(6): 0.0; S(7): 0.0; S(13): 0.0	389	Q14980	Nuclear mitotic apparatus protein 1 OS=Homo sapiens GN=NUMA1 PE=1 SV=2 - [NUMA1_HUMAN]	1	Q14980	S1225	Nuclear mitotic apparatus protein 1 (NuMA protein) (SP-H antigen)	NUMA1 NUMA																									Reverse	Class I	kNsLISSLEEEVSILNR	1	N-Term(Dimethyl:2H(4)); K1(Dimethyl:2H(4)); S3(Phospho)	72	ETD	28	1	2075.12	3	692.38	0.53	153.28	9935
ITVKKETQpSPEQVK	1	T(2): 0.0; T(7): 0.0; S(9): 100.0	388	Q9NYF8	Bcl-2-associated transcription factor 1 OS=Homo sapiens GN=BCLAF1 PE=1 SV=2 - [BCLF1_HUMAN]	1	Q9NYF8	S496	Bcl-2-associated transcription factor 1 (Btf)	BCLAF1 BTF KIAA0164																									Reverse	Class I	iTVkkETQsPEQVk	1	N-Term(Dimethyl); K4(Dimethyl); K5(Dimethyl); S9(Phospho); K14(Dimethyl)	60	ETD	31	2	1806.99	3	603.002	-2.84	38.69	2480
VVEAVNpSDpSDSEFGIPK	2	S(7): 100.0; S(9): 100.0; S(11): 0.0	388	Q02880	DNA topoisomerase 2-beta OS=Homo sapiens GN=TOP2B PE=1 SV=3 - [TOP2B_HUMAN]	1	Q02880	S1522, S1524	DNA topoisomerase 2-beta (EC 5.99.1.3) (DNA topoisomerase II, beta isozyme)	TOP2B																									Reverse	Class I	vVEAVNsDsDSEFGIPk	1	N-Term(Dimethyl); S7(Phospho); S9(Phospho); K17(Dimethyl)	111	ETD	7	0	2008.86	3	670.291	2.04	85.36	5928
QKEDVEVVGGpSDGEGAIGLSSDPK	1	S(11): 100.0; S(20): 0.0; S(21): 0.0	388	Q8NHZ8	Anaphase-promoting complex subunit CDC26 OS=Homo sapiens GN=CDC26 PE=1 SV=1 - [CDC26_HUMAN]	1	Q8NHZ8	S42	Anaphase-promoting complex subunit CDC26 (Anaphase-promoting complex subunit 12) (APC12) (Cell division cycle protein 26 homolog)	CDC26 ANAPC12 C9orf17																									Reverse	Class I	qkEDVEVVGGsDGEGAIGLSSDPk	1	N-Term(Dimethyl:2H(4)); K2(Dimethyl:2H(4)); S11(Phospho); K24(Dimethyl:2H(4))	65	HCD	28	1	2549.27	3	850.429	-1.45	102.37	6893
TDGFAEAIHpSPQVAGVPR	1	T(1): 0.0; S(10): 100.0	388	P12270	Nucleoprotein TPR OS=Homo sapiens GN=TPR PE=1 SV=2 - [TPR_HUMAN]	1	P12270	S2141	Nucleoprotein TPR	TPR																									Reverse	Class I	tDGFAEAIHsPQVAGVPR	1	N-Term(Dimethyl); S10(Phospho)	93	ETD	27	0	1959.92	3	653.978	-6.44	114.78	7397
RVpSLHCLLDQFDK	1	S(3): 100.0	388	Q8IWF6	Protein FAM116A OS=Homo sapiens GN=FAM116A PE=2 SV=1 - [F116A_HUMAN]	1	Q8IWF6	S127	Protein FAM116A	FAM116A																									Reverse	Class I	rVsLHcLLDQFDk	1	N-Term(Dimethyl); S3(Phospho); C6(Carbamidomethyl); K13(Dimethyl)	81	ETD	32	1	1766.87	3	589.628	1.22	141.9	7759
KRIDpSVYLDPLVFR	1	S(5): 100.0; Y(7): 0.0	388	O60443	Non-syndromic hearing impairment protein 5 OS=Homo sapiens GN=DFNA5 PE=2 SV=2 - [DFNA5_HUMAN]	1	O60443	S252	Non-syndromic hearing impairment protein 5 (Inversely correlated with estrogen receptor expression 1) (ICERE-1)	DFNA5 ICERE1																									Reverse	Class I	kRIDsVYLDPLVFR	1	N-Term(Dimethyl); K1(Dimethyl); S5(Phospho)	80	ETD	33	2	1857	3	619.673	-0.21	141.04	8195
ANpSTSDSVFTETPSPVLK	1	S(3): 100.0; T(4): 0.0; S(5): 0.0; S(7): 0.0; T(10): 0.0; T(12): 0.0; S(14): 0.0	387	Q9UKI2	Cdc42 effector protein 3 OS=Homo sapiens GN=CDC42EP3 PE=1 SV=1 - [BORG2_HUMAN]	1	Q9UKI2	S89	Cdc42 effector protein 3 (Binder of Rho GTPases 2) (MSE55-related Cdc42-binding protein)	CDC42EP3 BORG2 CEP3																									Reverse	Class I	aNsTSDSVFTETPSPVLk	1	N-Term(Dimethyl:2H(4)); S3(Phospho); K18(Dimethyl:2H(4))	89	HCD	13	0	2024.01	2	1012.51	0.8	138.12	11133
NRDASTLQpSQKAEGTGDAK	1	S(5): 0.0; T(6): 0.0; S(9): 100.0; T(15): 0.0	387	O00479	High mobility group nucleosome-binding domain-containing protein 4 OS=Homo sapiens GN=HMGN4 PE=1 SV=3 - [HMGN4_HUMAN]	1	O00479	S80	High mobility group nucleosome-binding domain-containing protein 4 (Non-histone chromosomal protein HMG-17-like 3) (Non-histone chromosomal protein)	HMGN4 HMG17L3 NHC																									Reverse	Class I	nRDASTLQsQkAEGTGDAk	1	N-Term(Dimethyl); S9(Phospho); K11(Dimethyl); K19(Dimethyl)	92	ETD	32	2	2141.02	3	714.345	-1.73	29.03	2134
AGLESGAEPGDGDpSDTTKK	1	S(5): 0.0; S(14): 100.0; T(16): 0.0; T(17): 0.0	387	O60832	H/ACA ribonucleoprotein complex subunit 4 OS=Homo sapiens GN=DKC1 PE=1 SV=3 - [DKC1_HUMAN]	1	O60832	S494	H/ACA ribonucleoprotein complex subunit 4 (EC 5.4.99.-) (CBF5 homolog) (Dyskerin) (Nopp140-associated protein of 57 kDa) (Nucleolar protein NAP57) (Nucleolar protein family A member 4) (snoRNP protein DKC1)	DKC1 NOLA4																									Reverse	Class I	aGLESGAEPGDGDsDTTkk	1	N-Term(Dimethyl:2H(4)); S14(Phospho); K18(Dimethyl:2H(4)); K19(Dimethyl:2H(4))	114	ETD	27	1	2010.96	3	670.993	-0.68	44.3	3036
DYDEEEQGYDpSEK	1	Y(2): 0.0; Y(9): 0.0; S(11): 100.0	387	Q05519	Splicing factor arginine/serine-rich 11 OS=Homo sapiens GN=SFRS11 PE=1 SV=1 - [SFR11_HUMAN]	1	Q05519	S434	Serine/arginine-rich splicing factor 11 (Arginine-rich 54 kDa nuclear protein) (p54) (Splicing factor, arginine/serine-rich 11)	SRSF11 SFRS11																									Reverse	Class I	dYDEEEQGYDsEk	1	N-Term(Dimethyl:2H(4)); S11(Phospho); K13(Dimethyl:2H(4))	74	ETD	13	0	1750.68	3	584.233	1.18	59.42	4285
DSYpSSSRSDLYSSGR	1	S(2): 0.0; Y(3): 0.0; S(4): 100.0; S(5): 0.0; S(6): 0.0; S(8): 0.0; Y(11): 0.0; S(12): 0.0; S(13): 0.0	387	P38159	Heterogeneous nuclear ribonucleoprotein G OS=Homo sapiens GN=RBMX PE=1 SV=3 - [HNRPG_HUMAN]	1	P38159	S328	RNA-binding motif protein, X chromosome (Glycoprotein p43) (Heterogeneous nuclear ribonucleoprotein G) (hnRNP G) [Cleaved into: RNA-binding motif protein, X chromosome, N-terminally processed]	RBMX HNRPG RBMXP1																									Reverse	Class I	dSYsSSRSDLYSSGR	1	N-Term(Dimethyl); S4(Phospho)	91	ETD	27	1	1774.73	3	592.247	-0.55	63.42	4334
IRpTQSFSLQER	1	T(3): 100.0; S(5): 0.0; S(7): 0.0	387	P29474	Nitric oxide synthase, endothelial OS=Homo sapiens GN=NOS3 PE=1 SV=3 - [NOS3_HUMAN]	1	P29474	T1175	Nitric oxide synthase, endothelial (EC 1.14.13.39) (Constitutive NOS) (cNOS) (EC-NOS) (Endothelial NOS) (eNOS) (NOS type III) (NOSIII)	NOS3																									Reverse	Class I	iRtQSFSLQER	1	N-Term(Dimethyl); T3(Phospho)	57	ETD	29	1	1472.72	3	491.577	-5.97	78.18	4775
ELLHSVHPEpSPNLK	1	S(5): 0.0; S(10): 100.0	387	Q9Y217	Myotubularin-related protein 6 OS=Homo sapiens GN=MTMR6 PE=1 SV=2 - [MTMR6_HUMAN]	1	Q9Y217	S561	Myotubularin-related protein 6 (EC 3.1.3.-)	MTMR6																									Reverse	Class I	eLLHSVHPEsPNLk	1	N-Term(Dimethyl:2H(4)); S10(Phospho); K14(Dimethyl:2H(4))	70	ETD	32	0	1743.93	3	581.981	0.63	77.15	4808
STIGVMVTApSHNPEEDNGVK	1	S(1): 0.0; T(2): 0.0; T(8): 0.0; S(10): 100.0	387	O95394	Phosphoacetylglucosamine mutase OS=Homo sapiens GN=PGM3 PE=1 SV=1 - [AGM1_HUMAN]	1	O95394	S64	Phosphoacetylglucosamine mutase (PAGM) (EC 5.4.2.3) (Acetylglucosamine phosphomutase) (N-acetylglucosamine-phosphate mutase) (Phosphoglucomutase-3) (PGM 3)	PGM3 AGM1																									Reverse	Class I	sTIGVMVTAsHNPEEDNGVk	1	N-Term(Dimethyl); S10(Phospho); K20(Dimethyl)	95	ETD	27	0	2221	3	741.006	-7.32	94.65	6206
pSKSEASLLQLLAGAGTHGTPSAPSR	1	S(1): 98.8; S(3): 0.6; S(6): 0.6; T(16): 0.0; T(19): 0.0; S(21): 0.0; S(24): 0.0	387	O94827	Pleckstrin homology domain-containing family G member 5 OS=Homo sapiens GN=PLEKHG5 PE=2 SV=3 - [PKHG5_HUMAN]	1	O94827	S932	Pleckstrin homology domain-containing family G member 5 (PH domain-containing family G member 5) (Guanine nucleotide exchange factor 720) (GEF720)	PLEKHG5 KIAA0720																									Reverse	Class I	skSEASLLQLLAGAGTHGTPSAPSR	3	N-Term(Dimethyl:2H(4)); S1(Phospho); K2(Dimethyl:2H(4))	79	HCD	30	1	2580.36	3	860.792	-1.26	143.01	9271
RSSTSGDpTEEEEEEEVVPFSSDEQK	1	S(2): 0.0; S(3): 0.0; T(4): 0.0; S(5): 0.0; T(8): 100.0; S(20): 0.0; S(21): 0.0	386	O15231	Zinc finger protein 185 OS=Homo sapiens GN=ZNF185 PE=1 SV=2 - [ZN185_HUMAN]	1	O15231	T23	Zinc finger protein 185 (LIM domain protein ZNF185) (P1-A)	ZNF185																									Reverse	Class I	rSSTSGDtEEEEEEEVVPFSSDEQk	1	N-Term(Dimethyl); T8(Phospho); K25(Dimethyl)	52	HCD	28	1	2966.24	3	989.418	2.76	130.85	11330
EREEpSEDELEEANGNNPIDIEVDQNK	1	S(5): 100.0	386	Q9UKL0	REST corepressor 1 OS=Homo sapiens GN=RCOR1 PE=1 SV=1 - [RCOR1_HUMAN]	1	Q9UKL0	S257	REST corepressor 1 (Protein CoREST)	RCOR1 KIAA0071 RCOR																									Reverse	Class I	eREEsEDELEEANGNNPIDIEVDQNk	1	N-Term(Dimethyl); S5(Phospho); K26(Dimethyl)	74	HCD	27	1	3151.36	3	1051.13	0.74	137.68	11450
KGpSITEYTAAEEK	1	S(3): 100.0; T(5): 0.0; Y(7): 0.0; T(8): 0.0	386	Q12982	BCL2/adenovirus E1B 19 kDa protein-interacting protein 2 OS=Homo sapiens GN=BNIP2 PE=1 SV=1 - [BNIP2_HUMAN]	1	Q12982	S114	BCL2/adenovirus E1B 19 kDa protein-interacting protein 2	BNIP2 NIP2																									Reverse	Class I	kGsITEYTAAEEk	1	N-Term(Dimethyl:2H(4)); K1(Dimethyl:2H(4)); S3(Phospho); K13(Dimethyl:2H(4))	65	ETD	28	1	1602.84	3	534.951	-1.32	63.22	4463
SQpSFAGVLGSHER	1	S(1): 0.0; S(3): 100.0; S(10): 0.0	386	Q6ZS17	Protein FAM65A OS=Homo sapiens GN=FAM65A PE=1 SV=1 - [FA65A_HUMAN]	1	Q6ZS17	S22	Protein FAM65A	FAM65A KIAA1930																									Reverse	Class I	sQsFAGVLGSHER	1	N-Term(Dimethyl:2H(4)); S3(Phospho)	82	ETD	29	0	1486.68	3	496.233	-10.61	96.51	5730
QRSApSQSpSLDKLDQELK	2	S(3): 0.0; S(5): 100.0; S(7): 0.0; S(8): 100.0	386	O60271	C-jun-amino-terminal kinase-interacting protein 4 OS=Homo sapiens GN=SPAG9 PE=1 SV=4 - [JIP4_HUMAN]	1	O60271	S730, S733	C-Jun-amino-terminal kinase-interacting protein 4 (JIP-4) (JNK-interacting protein 4) (Cancer/testis antigen 89) (CT89) (Human lung cancer oncogene 6 protein) (HLC-6) (JNK-associated leucine-zipper protein) (JLP) (Mitogen-activated protein kinase 8-interacting protein 4) (Proliferation-inducing protein 6) (Protein highly expressed in testis) (PHET) (Sperm surface protein) (Sperm-associated antige…	SPAG9 HSS KIAA0516 MAPK8IP4 SYD1 HLC6																									Reverse	Class I	qRSAsQSsLDkLDQELk	1	N-Term(Dimethyl); S5(Phospho); S8(Phospho); K11(Dimethyl); K17(Dimethyl)	94	ETD	28	2	2177.02	3	726.344	-2.96	105.98	7094
ASVpSPMDEPVPDSESPIEK	1	S(2): 0.0; S(4): 100.0; S(13): 0.0; S(15): 0.0	386	P46821	Microtubule-associated protein 1B OS=Homo sapiens GN=MAP1B PE=1 SV=1 - [MAP1B_HUMAN]	1	P46821	S1378	Microtubule-associated protein 1B (MAP-1B) [Cleaved into: MAP1 light chain LC1]	MAP1B																									Reverse	Class I	aSVsPMDEPVPDSESPIEk	1	N-Term(Dimethyl:2H(4)); S4(Phospho); K19(Dimethyl:2H(4))	96	HCD	13	0	2158.01	2	1079.51	-0.05	109.12	8034
KPApTPAEDDEDDDIDLFGpSDNEEEDK	2	T(4): 100.0; S(19): 100.0	385	P29692	Elongation factor 1-delta OS=Homo sapiens GN=EEF1D PE=1 SV=5 - [EF1D_HUMAN]	1	P29692	T147, S162	Elongation factor 1-delta (EF-1-delta) (Antigen NY-CO-4)	EEF1D EF1D																									Reverse	Class I	kPAtPAEDDEDDDIDLFGsDNEEEDk	1	N-Term(Dimethyl); K1(Dimethyl); T4(Phospho); S19(Phospho); K26(Dimethyl)	74	HCD	15	0	3153.23	3	1051.75	0.69	137.63	11188
KLEAMTNSKQpSIAK	1	T(6): 0.0; S(8): 0.0; S(11): 100.0	385	P18206	Vinculin OS=Homo sapiens GN=VCL PE=1 SV=4 - [VINC_HUMAN]	1	P18206	S383	Vinculin (Metavinculin)	VCL																									Reverse	Class I	kLEAmTNSkQsIAk	1	N-Term(Dimethyl); K1(Dimethyl); M5(Oxidation); K9(Dimethyl); S11(Phospho); K14(Dimethyl)	76	ETD	32	2	1756.93	3	586.314	0.08	36.01	2470
ERSENLpSLRR	1	S(3): 0.0; S(7): 100.0	385	Q5U651	Ras-interacting protein 1 OS=Homo sapiens GN=RASIP1 PE=1 SV=1 - [RAIN_HUMAN]	1	Q5U651	S322	Ras-interacting protein 1 (Rain)	RASIP1																									Reverse	Class I	eRSENLsLRR	1	N-Term(Dimethyl); S7(Phospho)	58	ETD	35	2	1367.68	3	456.565	0.07	47.49	3138
NKFGpSADNIAHLK	1	S(5): 100.0	385	Q9ULS5	Transmembrane and coiled-coil domains protein 3 OS=Homo sapiens GN=TMCC3 PE=2 SV=2 - [TMCC3_HUMAN]	1	Q9ULS5	S216	Transmembrane and coiled-coil domains protein 3	TMCC3 KIAA1145																									Reverse	Class I	nkFGsADNIAHLk	1	N-Term(Dimethyl); K2(Dimethyl); S5(Phospho); K13(Dimethyl)	71	ETD	32	1	1578.81	3	526.94	1.83	82.84	5114
LHVGNIpSPTCTNK	1	S(7): 100.0; T(9): 0.0; T(11): 0.0	385	Q9BWF3	RNA-binding protein 4 OS=Homo sapiens GN=RBM4 PE=1 SV=1 - [RBM4_HUMAN]	1	Q9BWF3	S86	RNA-binding protein 4 (Lark homolog) (hLark) (RNA-binding motif protein 4) (RNA-binding motif protein 4a)	RBM4 RBM4A																									Reverse	Class I	lHVGNIsPTcTNk	1	N-Term(Dimethyl:2H(4)); S7(Phospho); C10(Carbamidomethyl); K13(Dimethyl:2H(4))	94	ETD	29	0	1584.8	3	528.939	-1.34	74.7	5198
RPLpSGPDVGTPQPAGLASGAK	1	S(4): 100.0; T(10): 0.0; S(18): 0.0	385	O96013	Serine/threonine-protein kinase PAK 4 OS=Homo sapiens GN=PAK4 PE=1 SV=1 - [PAK4_HUMAN]	1	O96013	S181	Serine/threonine-protein kinase PAK 4 (EC 2.7.11.1) (p21-activated kinase 4) (PAK-4)	PAK4 KIAA1142																									Reverse	Class I	rPLsGPDVGTPQPAGLASGAk	1	N-Term(Dimethyl); S4(Phospho); K21(Dimethyl)	91	ETD	28	0	2112.09	3	704.701	1	90.8	6229
SHVEDGDIAGAPASpSPEAPPAEQDPVQLK	1	S(1): 0.0; S(14): 0.9; S(15): 99.1	385	Q9P2E9	Ribosome-binding protein 1 OS=Homo sapiens GN=RRBP1 PE=1 SV=4 - [RRBP1_HUMAN]	1	Q9P2E9	S1277	Ribosome-binding protein 1 (180 kDa ribosome receptor homolog) (RRp) (ES/130-related protein) (Ribosome receptor protein)	RRBP1 KIAA1398																									Reverse	Class I	sHVEDGDIAGAPASsPEAPPAEQDPVQLk	1	N-Term(Dimethyl:2H(4)); S15(Phospho); K29(Dimethyl:2H(4))	56	HCD	28	0	3056.46	3	1019.49	-2.96	102.15	6879
SLLSHEFQDEpTDTEEETLYSSKH	1	S(1): 0.0; S(4): 0.0; T(11): 100.0; T(13): 0.0; T(17): 0.0; Y(19): 0.0; S(20): 0.0; S(21): 0.0	385	O75976	Carboxypeptidase D OS=Homo sapiens GN=CPD PE=1 SV=2 - [CBPD_HUMAN]	1	O75976	T1368	Carboxypeptidase D (EC 3.4.17.22) (Metallocarboxypeptidase D) (gp180)	CPD																									Reverse	Class I	sLLSHEFQDEtDTEEETLYSSkH	1	N-Term(Dimethyl:2H(4)); T11(Phospho); K22(Dimethyl:2H(4))	83	HCD	30	1	2869.28	3	957.097	-4.55	122.31	7489
QIpSQDVKLEPDILLR	1	S(3): 100.0	385	Q01433	AMP deaminase 2 OS=Homo sapiens GN=AMPD2 PE=1 SV=2 - [AMPD2_HUMAN]	1	Q01433	S168	AMP deaminase 2 (EC 3.5.4.6) (AMP deaminase isoform L)	AMPD2																									Reverse	Class I	qIsQDVkLEPDILLR	1	N-Term(Dimethyl:2H(4)); S3(Phospho); K7(Dimethyl:2H(4))	83	ETD	27	1	1911.06	3	637.693	-8.12	139.1	9007
RFpSMEGISNILQSGIR	1	S(3): 100.0; S(8): 0.0; S(13): 0.0	385	Q99689	Fasciculation and elongation protein zeta-1 OS=Homo sapiens GN=FEZ1 PE=1 SV=1 - [FEZ1_HUMAN]	1	Q99689	S316	Fasciculation and elongation protein zeta-1 (Zygin I) (Zygin-1)	FEZ1																									Reverse	Class I	rFsMEGISNILQSGIR	1	N-Term(Dimethyl); S3(Phospho)	77	ETD	28	1	1915.95	3	639.321	0.94	145.95	9274
ALSSLHGDDQDpSEDEVLTIPEVK	1	S(3): 0.0; S(4): 0.0; S(12): 100.0; T(18): 0.0	384	P11717	Cation-independent mannose-6-phosphate receptor OS=Homo sapiens GN=IGF2R PE=1 SV=2 - [MPRI_HUMAN]	1	P11717	S2409	Cation-independent mannose-6-phosphate receptor (CI Man-6-P receptor) (CI-MPR) (M6PR) (300 kDa mannose 6-phosphate receptor) (MPR 300) (Insulin-like growth factor 2 receptor) (Insulin-like growth factor II receptor) (IGF-II receptor) (M6P/IGF2 receptor) (M6P/IGF2R) (CD antigen CD222)	IGF2R MPRI																									Reverse	Class I	aLSSLHGDDQDsEDEVLTIPEVk	1	N-Term(Dimethyl:2H(4)); S12(Phospho); K23(Dimethyl:2H(4))	83	HCD	27	0	2641.27	2	1321.14	0.63	140.64	12033
AGAGMITQHSSNApSPINR	1	T(7): 0.0; S(10): 0.0; S(11): 0.0; S(14): 100.0	384	Q9NWH9	SAFB-like transcription modulator OS=Homo sapiens GN=SLTM PE=1 SV=2 - [SLTM_HUMAN]	1	Q9NWH9	S1002	SAFB-like transcription modulator (Modulator of estrogen-induced transcription)	SLTM MET																									Reverse	Class I	aGAGmITQHSSNAsPINR	1	N-Term(Dimethyl); M5(Oxidation); S14(Phospho)	121	ETD	28	0	1935.87	3	645.962	-2.19	44.19	3176
VEQALSEVApSpSLQSSAPK	2	S(6): 0.0; S(10): 100.0; S(11): 100.0; S(14): 0.0; S(15): 0.0	384	Q86TV6	Tetratricopeptide repeat protein 7B OS=Homo sapiens GN=TTC7B PE=1 SV=2 - [TTC7B_HUMAN]	1	Q86TV6	S575, S576	Tetratricopeptide repeat protein 7B (TPR repeat protein 7B) (Tetratricopeptide repeat protein 7-like-1) (TPR repeat protein 7-like-1)	TTC7B TTC7L1																									Reverse	Class I	vEQALSEVAssLQSSAPk	1	N-Term(Dimethyl); S10(Phospho); S11(Phospho); K18(Dimethyl)	106	ETD	8	0	2046.94	3	682.985	0.08	76.18	5324
RSALSSpSLRDLSEAGK	1	S(2): 0.0; S(5): 0.0; S(6): 0.0; S(7): 100.0; S(12): 0.0	384	Q6DN90	IQ motif and SEC7 domain-containing protein 1 OS=Homo sapiens GN=IQSEC1 PE=1 SV=1 - [IQEC1_HUMAN]	1	Q6DN90	S925	IQ motif and SEC7 domain-containing protein 1 (ADP-ribosylation factors guanine nucleotide-exchange protein 100) (ADP-ribosylation factors guanine nucleotide-exchange protein 2) (Brefeldin-resistant Arf-GEF 2 protein)	IQSEC1 ARFGEP100 BRAG2 KIAA0763																									Reverse	Class I	rSALSSsLRDLSEAGk	1	N-Term(Dimethyl:2H(4)); S7(Phospho); K16(Dimethyl:2H(4))	105	ETD	33	2	1820.97	3	607.662	-0.73	90.73	5493
YAYKAEPYVApSEYK	1	Y(1): 0.0; Y(3): 0.0; Y(8): 0.0; S(11): 100.0; Y(13): 0.0	384	Q9BZ29	Dedicator of cytokinesis protein 9 OS=Homo sapiens GN=DOCK9 PE=1 SV=2 - [DOCK9_HUMAN]	1	Q9BZ29	S927	Dedicator of cytokinesis protein 9 (Cdc42 guanine nucleotide exchange factor zizimin-1)	DOCK9 KIAA1058																									Reverse	Class I	yAYkAEPYVAsEYk	1	N-Term(Dimethyl:2H(4)); K4(Dimethyl:2H(4)); S11(Phospho); K14(Dimethyl:2H(4))	63	ETD	28	1	1857.94	3	619.985	-2.93	96.11	6511
ESFLYRSDpSDYDLSPK	1	S(2): 0.0; Y(5): 0.0; S(7): 0.0; S(9): 100.0; Y(11): 0.0; S(14): 0.0	384	Q07343;Q08499	cAMP-specific 3',5'-cyclic phosphodiesterase 4B OS=Homo sapiens GN=PDE4B PE=1 SV=1 - [PDE4B_HUMAN]|cAMP-specific 3',5'-cyclic phosphodiesterase 4D OS=Homo sapiens GN=PDE4D PE=1 SV=2 - [PDE4D_HUMAN]	2	Q07343	S140	cAMP-specific 3',5'-cyclic phosphodiesterase 4B (EC 3.1.4.17) (DPDE4) (PDE32)	PDE4B DPDE4	Q08499	S197	cAMP-specific 3',5'-cyclic phosphodiesterase 4D (EC 3.1.4.17) (DPDE3) (PDE43)	PDE4D DPDE3																					Reverse	Class I	eSFLYRSDsDYDLSPk	1	N-Term(Dimethyl); S9(Phospho); K16(Dimethyl)	78	ETD	28	1	2057.91	3	686.64	-2.21	128.98	8401
ELDEGRYGVYEDENYEVGpSDDEEIPFK	1	Y(7): 0.0; Y(10): 0.0; Y(15): 0.0; S(19): 100.0	383	O15541	RING finger protein 113A OS=Homo sapiens GN=RNF113A PE=1 SV=1 - [R113A_HUMAN]	1	O15541	S253	RING finger protein 113A (Zinc finger protein 183)	RNF113A RNF113 ZNF183																									Reverse	Class I	eLDEGRYGVYEDENYEVGsDDEEIPFk	1	N-Term(Dimethyl); S19(Phospho); K27(Dimethyl)	57	HCD	27	1	3332.45	3	1111.49	13.78	146.24	12274
GGpSPAPYVDTFLNAPDILPR	1	S(3): 100.0; Y(7): 0.0; T(10): 0.0	383	Q5U651	Ras-interacting protein 1 OS=Homo sapiens GN=RASIP1 PE=1 SV=1 - [RAIN_HUMAN]	1	Q5U651	S419	Ras-interacting protein 1 (Rain)	RASIP1																									Reverse	Class I	gGsPAPYVDTFLNAPDILPR	1	N-Term(Dimethyl:2H(4)); S3(Phospho)	86	HCD	14	0	2212.1	2	1106.55	0.02	155.82	13300
EGTAPpSENGETKAEEAQK	1	T(3): 0.0; S(6): 100.0; T(11): 0.0	383	Q15651	High mobility group nucleosome-binding domain-containing protein 3 OS=Homo sapiens GN=HMGN3 PE=1 SV=2 - [HMGN3_HUMAN]	1	Q15651	S78	High mobility group nucleosome-binding domain-containing protein 3 (Thyroid receptor-interacting protein 7) (TR-interacting protein 7) (TRIP-7)	HMGN3 TRIP7 PNAS-24																									Reverse	Class I	eGTAPsENGETkAEEAQk	1	N-Term(Dimethyl); S6(Phospho); K12(Dimethyl); K18(Dimethyl)	79	ETD	27	1	2039.91	3	680.642	-2.13	33.27	2336
QHAADTSEARPFRGpSVGR	1	T(6): 0.0; S(7): 0.0; S(15): 100.0	383	Q9NUQ6	SPATS2-like protein OS=Homo sapiens GN=SPATS2L PE=2 SV=2 - [SPS2L_HUMAN]	1	Q9NUQ6	S526	SPATS2-like protein (DNA polymerase-transactivated protein 6) (Stress granule and nucleolar protein) (SGNP)	SPATS2L DNAPTP6 SP1224																									Reverse	Class I	qHAADTSEARPFRGsVGR	1	N-Term(Dimethyl); S15(Phospho)	84	ETD	39	1	2049.96	3	683.991	-1.19	38.32	2632
RTSpSTLDSEGTFNSYRK	1	T(2): 0.0; S(3): 0.0; S(4): 100.0; T(5): 0.0; S(8): 0.0; T(11): 0.0; S(14): 0.0; Y(15): 0.0	383	Q92609	TBC1 domain family member 5 OS=Homo sapiens GN=TBC1D5 PE=1 SV=1 - [TBCD5_HUMAN]	1	Q92609	S44	TBC1 domain family member 5	TBC1D5 KIAA0210																									Reverse	Class I	rTSsTLDSEGTFNSYRk	1	N-Term(Dimethyl); S4(Phospho); K17(Dimethyl)	101	ETD	33	2	2084.97	3	695.66	0.66	75.38	4725
LTVENpSPKQEAGISEGQGTAGEEEEK	1	T(2): 0.0; S(6): 100.0; S(14): 0.0; T(19): 0.0	383	O43583	Density-regulated protein OS=Homo sapiens GN=DENR PE=1 SV=2 - [DENR_HUMAN]	1	O43583	S73	Density-regulated protein (DRP) (Protein DRP1) (Smooth muscle cell-associated protein 3) (SMAP-3)	DENR DRP1 H14																									Reverse	Class I	lTVENsPkQEAGISEGQGTAGEEEEk	1	N-Term(Dimethyl); S6(Phospho); K8(Dimethyl); K26(Dimethyl)	71	HCD	27	1	2881.32	3	961.11	-6.86	75.56	5050
GLAEVQQDGEAEEGATpSDGEK	1	T(16): 0.4; S(17): 99.6	383	Q02952	A-kinase anchor protein 12 OS=Homo sapiens GN=AKAP12 PE=1 SV=3 - [AKA12_HUMAN]	1	Q02952	S598	A-kinase anchor protein 12 (AKAP-12) (A-kinase anchor protein 250 kDa) (AKAP 250) (Gravin) (Myasthenia gravis autoantigen)	AKAP12 AKAP250																									Reverse	Class I	gLAEVQQDGEAEEGATsDGEk	1	N-Term(Dimethyl:2H(4)); S17(Phospho); K21(Dimethyl:2H(4))	72	HCD	13	0	2264	3	755.337	-3.53	72.85	5337
VSPpSIHGYHFDTASR	1	S(2): 0.0; S(4): 100.0; Y(8): 0.0; T(12): 0.0; S(14): 0.0	383	Q9NR00	Uncharacterized protein C8orf4 OS=Homo sapiens GN=C8orf4 PE=1 SV=1 - [CH004_HUMAN]	1	Q9NR00	S21	Uncharacterized protein C8orf4 (Thyroid cancer protein 1) (TC-1)	C8orf4 TC1																									Reverse	Class I	vSPsIHGYHFDTASR	1	N-Term(Dimethyl:2H(4)); S4(Phospho)	66	ETD	32	0	1785.83	3	595.947	-0.13	96.93	5553
RSLAESGLSWFpSESEEK	1	S(2): 0.0; S(6): 0.0; S(9): 0.0; S(12): 100.0; S(14): 0.0	383	Q8NEY1	Neuron navigator 1 OS=Homo sapiens GN=NAV1 PE=1 SV=2 - [NAV1_HUMAN]	1	Q8NEY1	S474	Neuron navigator 1 (Pore membrane and/or filament-interacting-like protein 3) (Steerin-1) (Unc-53 homolog 1) (unc53H1)	NAV1 KIAA1151 KIAA1213 POMFIL3 STEERIN1																									Reverse	Class I	rSLAESGLSWFsESEEk	1	N-Term(Dimethyl:2H(4)); S12(Phospho); K17(Dimethyl:2H(4))	77	ETD	29	1	2085.97	3	695.995	-13.96	138.39	7973
TTAGpSVDWTDQLGLR	1	T(1): 0.0; T(2): 0.0; S(5): 100.0; T(9): 0.0	382	Q9C0C2	182 kDa tankyrase 1-binding protein OS=Homo sapiens GN=TNKS1BP1 PE=1 SV=3 - [TB182_HUMAN]	1	Q9C0C2	S1158	182 kDa tankyrase-1-binding protein	TNKS1BP1 KIAA1741 TAB182																									Reverse	Class I	tTAGsVDWTDQLGLR	1	N-Term(Dimethyl:2H(4)); S5(Phospho)	111	ETD	14	0	1731.83	3	577.947	0.97	142.85	10845
TWpTLCGTPEYLAPEIILSK	1	T(1): 0.3; T(3): 99.7; T(7): 0.0; Y(10): 0.0; S(18): 0.0	382	P17612;P22694	cAMP-dependent protein kinase catalytic subunit alpha OS=Homo sapiens GN=PRKACA PE=1 SV=2 - [KAPCA_HUMAN]|cAMP-dependent protein kinase catalytic subunit beta OS=Homo sapiens GN=PRKACB PE=1 SV=2 - [KAPCB_HUMAN]	2	P17612	T198	cAMP-dependent protein kinase catalytic subunit alpha (PKA C-alpha) (EC 2.7.11.11)	PRKACA PKACA	P22694	T198	cAMP-dependent protein kinase catalytic subunit beta (PKA C-beta) (EC 2.7.11.11)	PRKACB																					Reverse	Class I	tWtLcGTPEYLAPEIILSk	1	N-Term(Dimethyl); T3(Phospho); C5(Carbamidomethyl); K19(Dimethyl)	52	HCD	14	0	2328.17	3	776.727	2.93	154.43	11718
KLGGLLPPGGEGGPEATVVpSDEDEAAEMEDEAVR	1	T(17): 0.0; S(20): 100.0	382	P51178	1-phosphatidylinositol-4,5-bisphosphate phosphodiesterase delta-1 OS=Homo sapiens GN=PLCD1 PE=1 SV=2 - [PLCD1_HUMAN]	1	P51178	S460	1-phosphatidylinositol 4,5-bisphosphate phosphodiesterase delta-1 (EC 3.1.4.11) (Phosphoinositide phospholipase C-delta-1) (Phospholipase C-III) (PLC-III) (Phospholipase C-delta-1) (PLC-delta-1)	PLCD1																									Reverse	Class I	kLGGLLPPGGEGGPEATVVsDEDEAAEmEDEAVR	1	K1(Dimethyl); N-Term(Dimethyl); S20(Phospho); M28(Oxidation)	84	HCD	28	1	3576.63	3	1192.88	-0.38	143.59	12129
LKSSpSpSSEDVASSNQK	2	S(3): 0.0; S(4): 0.0; S(5): 100.0; S(6): 100.0; S(7): 0.0; S(12): 0.0; S(13): 0.0	382	P51813	Cytoplasmic tyrosine-protein kinase BMX OS=Homo sapiens GN=BMX PE=1 SV=1 - [BMX_HUMAN]	1	P51813	S253, S254	Cytoplasmic tyrosine-protein kinase BMX (EC 2.7.10.2) (Bone marrow tyrosine kinase gene in chromosome X protein) (Epithelial and endothelial tyrosine kinase) (ETK) (NTK38)	BMX																									Reverse	Class I	lkSSssSEDVASSNQk	1	N-Term(Dimethyl); K2(Dimethyl); S5(Phospho); S6(Phospho); K16(Dimethyl)	92	ETD	15	1	1897.82	3	633.278	-0.24	35.63	2452
QAEEECAHRGpSPLPK	1	S(11): 100.0	382	Q9H147	Deoxynucleotidyltransferase terminal-interacting protein 1 OS=Homo sapiens GN=DNTTIP1 PE=1 SV=2 - [TDIF1_HUMAN]	1	Q9H147	S161	Deoxynucleotidyltransferase terminal-interacting protein 1 (Terminal deoxynucleotidyltransferase-interacting factor 1) (TdIF1) (TdT-interacting factor 1)	DNTTIP1 C20orf167 TDIF1																									Reverse	Class I	qAEEEcAHRGsPLPk	1	N-Term(Dimethyl); C6(Carbamidomethyl); S11(Phospho); K15(Dimethyl)	72	ETD	32	1	1844.83	3	615.616	-1.52	36.95	2520
VEAEAGGSGARpTPPLSR	1	S(8): 0.0; T(12): 100.0; S(16): 0.0	382	Q9Y3Q8	TSC22 domain family protein 4 OS=Homo sapiens GN=TSC22D4 PE=1 SV=2 - [T22D4_HUMAN]	1	Q9Y3Q8	T229	TSC22 domain family protein 4 (TSC22-related-inducible leucine zipper protein 2) (Tsc-22-like protein THG-1)	TSC22D4 THG1 TILZ2																									Reverse	Class I	vEAEAGGSGARtPPLSR	1	N-Term(Dimethyl:2H(4)); T12(Phospho)	84	ETD	28	1	1766.87	3	589.628	-2.14	47.14	3402
RLAAQESpSETEDMSVPR	1	S(7): 0.0; S(8): 100.0; T(10): 0.0; S(14): 0.0	382	Q641Q2;Q5SNT6	Protein FAM21A OS=Homo sapiens GN=FAM21A PE=1 SV=3 - [FA21A_HUMAN]|Protein FAM21B OS=Homo sapiens GN=FAM21B PE=1 SV=2 - [FA21B_HUMAN]	2	Q641Q2	S1054	WASH complex subunit FAM21A	FAM21A	Q5SNT6	S966	WASH complex subunit FAM21B	FAM21B																					Reverse	Class I	rLAAQESsETEDmSVPR	1	N-Term(Dimethyl); S8(Phospho); M13(Oxidation)	96	ETD	29	1	2029.88	3	677.299	-4.11	52.6	3766
DLTHpSDSESSLHMSDR	1	T(3): 0.0; S(5): 100.0; S(7): 0.0; S(9): 0.0; S(10): 0.0; S(14): 0.0	382	Q13586	Stromal interaction molecule 1 OS=Homo sapiens GN=STIM1 PE=1 SV=2 - [STIM1_HUMAN]	1	Q13586	S519	Stromal interaction molecule 1	STIM1 GOK																									Reverse	Class I	dLTHsDSESSLHMSDR	1	N-Term(Dimethyl:2H(4)); S5(Phospho)	88	ETD	31	0	1928.79	3	643.603	-3.02	64.11	3864
VLGpSEGEEEDEALSPAK	1	S(4): 100.0; S(14): 0.0	382	P18858	DNA ligase 1 OS=Homo sapiens GN=LIG1 PE=1 SV=1 - [DNL1_HUMAN]	1	P18858	S66	DNA ligase 1 (EC 6.5.1.1) (DNA ligase I) (Polydeoxyribonucleotide synthase [ATP] 1)	LIG1																									Reverse	Class I	vLGsEGEEEDEALSPAk	1	N-Term(Dimethyl); S4(Phospho); K17(Dimethyl)	71	ETD	13	0	1895.85	3	632.622	0.36	98.18	7283
SHILEDDENpSVDISMLK	1	S(1): 0.0; S(10): 100.0; S(14): 0.0	382	O75717	WD repeat and HMG-box DNA-binding protein 1 OS=Homo sapiens GN=WDHD1 PE=1 SV=1 - [WDHD1_HUMAN]	1	O75717	S383	WD repeat and HMG-box DNA-binding protein 1 (Acidic nucleoplasmic DNA-binding protein 1) (And-1)	WDHD1 AND1																									Reverse	Class I	sHILEDDENsVDISmLk	1	N-Term(Dimethyl); S10(Phospho); M15(Oxidation); K17(Dimethyl)	119	ETD	29	0	2096.94	3	699.653	-0.47	113.84	7548
GSGTApSDDEFENLR	1	S(2): 0.0; T(4): 0.0; S(6): 100.0	382	Q7Z6Z7	E3 ubiquitin-protein ligase HUWE1 OS=Homo sapiens GN=HUWE1 PE=1 SV=3 - [HUWE1_HUMAN]	1	Q7Z6Z7	S1907	E3 ubiquitin-protein ligase HUWE1 (EC 6.3.2.-) (ARF-binding protein 1) (ARF-BP1) (HECT, UBA and WWE domain-containing protein 1) (Homologous to E6AP carboxyl terminus homologous protein 9) (HectH9) (Large structure of UREB1) (LASU1) (Mcl-1 ubiquitin ligase E3) (Mule) (Upstream regulatory element-binding protein 1) (URE-B1) (URE-binding protein 1)	HUWE1 KIAA0312 KIAA1578 UREB1 HSPC272																									Reverse	Class I	gSGTAsDDEFENLR	1	N-Term(Dimethyl); S6(Phospho)	61	ETD	13	0	1605.64	3	535.886	-0.49	102.84	7607
GNIETTSEDGQVFpSPKK	1	T(5): 0.0; T(6): 0.0; S(7): 0.0; S(14): 100.0	382	Q5T200	Zinc finger CCCH domain-containing protein 13 OS=Homo sapiens GN=ZC3H13 PE=1 SV=1 - [ZC3HD_HUMAN]	1	Q5T200	S993	Zinc finger CCCH domain-containing protein 13	ZC3H13 KIAA0853																									Reverse	Class I	gNIETTSEDGQVFsPkk	1	N-Term(Dimethyl:2H(4)); S14(Phospho); K16(Dimethyl:2H(4)); K17(Dimethyl:2H(4))	123	HCD	27	1	2013.05	2	1007.03	9.33	97.18	7944
LLSSNEDDANILSpSPTDR	1	S(3): 0.0; S(4): 0.0; S(13): 0.4; S(14): 99.6; T(16): 0.0	382	O75448	Mediator of RNA polymerase II transcription subunit 24 OS=Homo sapiens GN=MED24 PE=1 SV=1 - [MED24_HUMAN]	1	O75448	S873	Mediator of RNA polymerase II transcription subunit 24 (Activator-recruited cofactor 100 kDa component) (ARC100) (Cofactor required for Sp1 transcriptional activation subunit 4) (CRSP complex subunit 4) (Mediator complex subunit 24) (Thyroid hormone receptor-associated protein 4) (Thyroid hormone receptor-associated protein complex 100 kDa component) (Trap100) (hTRAP100) (Vitamin D3 receptor-inte…	MED24 ARC100 CRSP4 DRIP100 KIAA0130 THRAP4 TRAP100																									Reverse	Class I	lLSSNEDDANILSsPTDR	1	N-Term(Dimethyl); S14(Phospho)	105	HCD	14	0	2054.93	2	1027.97	-0.4	118.88	9867
YVDSEGHLpYTVPIR	1	Y(1): 0.0; S(4): 0.0; Y(9): 100.0; T(10): 0.0	381	Q03135	Caveolin-1 OS=Homo sapiens GN=CAV1 PE=1 SV=4 - [CAV1_HUMAN]	1	Q03135	Y14	Caveolin-1	CAV1 CAV																									Reverse	Class I	yVDSEGHLyTVPIR	1	N-Term(Dimethyl); Y9(Phospho)	61	HCD	28	0	1756.83	2	878.92	1.18	124.35	10761
SVpSEAALAQPQGPLGTDSLK	1	S(1): 0.0; S(3): 100.0; T(16): 0.0; S(18): 0.0	381	Q05469	Hormone-sensitive lipase OS=Homo sapiens GN=LIPE PE=1 SV=4 - [LIPS_HUMAN]	1	Q05469	S855	Hormone-sensitive lipase (HSL) (EC 3.1.1.79)	LIPE																									Reverse	Class I	sVsEAALAQPQGPLGTDSLk	1	N-Term(Dimethyl:2H(4)); S3(Phospho); K20(Dimethyl:2H(4))	57	HCD	13	0	2113.1	2	1057.05	-0.96	136.38	10979
QEAKPQQAAGMLpSPK	1	S(13): 100.0	381	Q13428	Treacle protein OS=Homo sapiens GN=TCOF1 PE=1 SV=2 - [TCOF_HUMAN]	1	Q13428	S1257	Treacle protein (Treacher Collins syndrome protein)	TCOF1																									Reverse	Class I	qEAkPQQAAGmLsPk	1	N-Term(Dimethyl); K4(Dimethyl); M11(Oxidation); S13(Phospho); K15(Dimethyl)	74	ETD	28	0	1763.87	3	588.629	-2.62	43.59	3135
KQSFDDNDpSEELEDK	1	S(3): 0.0; S(9): 100.0	381	O60841	Eukaryotic translation initiation factor 5B OS=Homo sapiens GN=EIF5B PE=1 SV=3 - [IF2P_HUMAN]	1	O60841	S113	Eukaryotic translation initiation factor 5B (eIF-5B) (Translation initiation factor IF-2)	EIF5B IF2 KIAA0741																									Reverse	Class I	kQSFDDNDsEELEDk	1	N-Term(Dimethyl); K1(Dimethyl); S9(Phospho); K15(Dimethyl)	89	ETD	29	1	1962.82	3	654.945	-0.05	62.82	3950
EVKAEEKpSPISINVK	1	S(8): 100.0; S(11): 0.0	381	Q9UK58	Cyclin-L1 OS=Homo sapiens GN=CCNL1 PE=1 SV=1 - [CCNL1_HUMAN]	1	Q9UK58	S352	Cyclin-L1 (Cyclin-L)	CCNL1 BM-001 UNQ530/PRO1073																									Reverse	Class I	eVkAEEksPISINVk	1	N-Term(Dimethyl); K3(Dimethyl); K7(Dimethyl); S8(Phospho); K15(Dimethyl)	74	ETD	31	2	1863.02	3	621.678	-2.35	73.48	4339
TApSFSESRADEVAPAK	1	T(1): 0.0; S(3): 100.0; S(5): 0.0; S(7): 0.0	381	P53396	ATP-citrate synthase OS=Homo sapiens GN=ACLY PE=1 SV=3 - [ACLY_HUMAN]	1	P53396	S455	ATP-citrate synthase (EC 2.3.3.8) (ATP-citrate (pro-S-)-lyase) (ACL) (Citrate cleavage enzyme)	ACLY																									Reverse	Class I	tAsFSESRADEVAPAk	1	N-Term(Dimethyl:2H(4)); S3(Phospho); K16(Dimethyl:2H(4))	89	ETD	28	1	1809.88	3	603.965	-3.02	66.24	4670
LCAGIMITApSHNPK	1	T(8): 0.0; S(10): 100.0	381	Q96G03	Phosphoglucomutase-2 OS=Homo sapiens GN=PGM2 PE=1 SV=4 - [PGM2_HUMAN]	1	Q96G03	S165	Phosphoglucomutase-2 (PGM 2) (EC 5.4.2.2) (Glucose phosphomutase 2) (Phosphodeoxyribomutase) (Phosphopentomutase) (EC 5.4.2.7)	PGM2 MSTP006																									Reverse	Class I	lcAGImITAsHNPk	1	N-Term(Dimethyl:2H(4)); C2(Carbamidomethyl); M6(Oxidation); S10(Phospho); K14(Dimethyl:2H(4))	80	ETD	28	0	1672.84	3	558.284	-2.24	88.22	6031
DLGHPVEEEDELEpSGDQEDEDDESEDPGK	1	S(14): 100.0; S(24): 0.0	381	O60763	General vesicular transport factor p115 OS=Homo sapiens GN=USO1 PE=1 SV=2 - [USO1_HUMAN]	1	O60763	S942	General vesicular transport factor p115 (Protein USO1 homolog) (Transcytosis-associated protein) (TAP) (Vesicle-docking protein)	USO1 VDP																									Reverse	Class I	dLGHPVEEEDELEsGDQEDEDDESEDPGk	1	N-Term(Dimethyl); S14(Phospho); K29(Dimethyl)	91	HCD	15	0	3379.31	3	1127.11	1.95	97.35	6184
ISKLEVTEIVKPpSPK	1	S(2): 0.0; T(7): 0.0; S(13): 100.0	381	Q7Z6E9	Retinoblastoma-binding protein 6 OS=Homo sapiens GN=RBBP6 PE=1 SV=1 - [RBBP6_HUMAN]	1	Q7Z6E9	S1179	E3 ubiquitin-protein ligase RBBP6 (EC 6.3.2.-) (Proliferation potential-related protein) (Protein P2P-R) (Retinoblastoma-binding Q protein 1) (RBQ-1) (Retinoblastoma-binding protein 6) (p53-associated cellular protein of testis)	RBBP6 P2PR PACT RBQ1 My038																									Reverse	Class I	iSkLEVTEIVkPsPk	1	N-Term(Dimethyl:2H(4)); K3(Dimethyl:2H(4)); K11(Dimethyl:2H(4)); S13(Phospho); K15(Dimethyl:2H(4))	68	ETD	31	1	1876.18	3	626.066	-1.62	108.55	6278
RSpTQGVTLTDLQEAEK	1	S(2): 0.3; T(3): 99.7; T(7): 0.0; T(9): 0.0	381	O14974	Protein phosphatase 1 regulatory subunit 12A OS=Homo sapiens GN=PPP1R12A PE=1 SV=1 - [MYPT1_HUMAN]	1	O14974	T696	Protein phosphatase 1 regulatory subunit 12A (Myosin phosphatase-targeting subunit 1) (Myosin phosphatase target subunit 1) (Protein phosphatase myosin-binding subunit)	PPP1R12A MBS MYPT1																									Reverse	Class I	rStQGVTLTDLQEAEk	1	N-Term(Dimethyl:2H(4)); T3(Phospho); K16(Dimethyl:2H(4))	60	HCD	28	1	1919.99	2	960.497	-2.67	106.01	7095
LSAFRPWpSPAVSASEK	1	S(2): 0.0; S(8): 100.0; S(12): 0.0; S(14): 0.0	381	P12755	Ski oncogene OS=Homo sapiens GN=SKI PE=1 SV=1 - [SKI_HUMAN]	1	P12755	S383	Ski oncogene (Proto-oncogene c-Ski)	SKI																									Reverse	Class I	lSAFRPWsPAVSASEk	1	N-Term(Dimethyl:2H(4)); S8(Phospho); K16(Dimethyl:2H(4))	71	ETD	28	0	1876.97	3	626.328	-5.82	134.32	8556
VQGEAVSNIQENTQTPTVQEEpSEEEEVDETGVEVK	1	S(7): 0.0; T(13): 0.0; T(15): 0.0; T(17): 0.0; S(22): 100.0; T(30): 0.0	381	Q13765	Nascent polypeptide-associated complex subunit alpha OS=Homo sapiens GN=NACA PE=1 SV=1 - [NACA_HUMAN]	1	Q13765	S166	Nascent polypeptide-associated complex subunit alpha (NAC-alpha) (Alpha-NAC) (allergen Hom s 2)	NACA HSD48																									Reverse	Class I	vQGEAVSNIQENTQTPTVQEEsEEEEVDETGVEVk	1	N-Term(Dimethyl); S22(Phospho); K35(Dimethyl)	80	HCD	13	0	3996.79	3	1332.93	-1.98	118.16	8664
FKpTQPVTFDEIQEVEEEGVSPMEEEK	1	T(3): 100.0; T(7): 0.0; S(20): 0.0	381	Q7Z7L8	Protein Ag2 homolog OS=Homo sapiens GN=AG2 PE=1 SV=2 - [AG2_HUMAN]	1	Q7Z7L8	T368	Uncharacterized protein C11orf96 (Protein Ag2 homolog)	C11orf96 AG2																									Reverse	Class I	fktQPVTFDEIQEVEEEGVSPmEEEk	1	N-Term(Dimethyl); K2(Dimethyl); T3(Phospho); M22(Oxidation); K26(Dimethyl)	42	HCD	27	1	3234.47	3	1078.83	1.19	139.01	9512
QVQpSLTCEVDALK	1	S(4): 100.0; T(6): 0.0	380	P08670	Vimentin OS=Homo sapiens GN=VIM PE=1 SV=4 - [VIME_HUMAN]	1	P08670	S325	Vimentin	VIM																									Reverse	Class I	qVQsLTcEVDALk	1	N-Term(Dimethyl:2H(4)); S4(Phospho); C7(Carbamidomethyl); K13(Dimethyl:2H(4))	72	ETD	14	0	1634.83	3	545.616	0.68	136.14	10278
SNpSLSEQLAINTSPDAVK	1	S(1): 0.0; S(3): 100.0; S(5): 0.0; T(12): 0.0; S(13): 0.0	380	Q5T1M5	FK506-binding protein 15 OS=Homo sapiens GN=FKBP15 PE=1 SV=2 - [FKB15_HUMAN]	1	Q5T1M5	S346	FK506-binding protein 15 (FKBP-15) (133 kDa FK506-binding protein) (133 kDa FKBP) (FKBP-133) (WASP and FKBP-like) (WAFL)	FKBP15 KIAA0674																									Reverse	Class I	sNSLSEQLAINTSPDAVk	1	N-Term(Dimethyl:2H(4)); S1(Phospho); K18(Dimethyl:2H(4))	91	HCD	13	0	2018.03	2	1009.52	1.73	129.27	10390
AGDTpSDQEGHSLEEK	1	T(4): 0.0; S(5): 100.0; S(11): 0.0	380	Q99607	ETS-related transcription factor Elf-4 OS=Homo sapiens GN=ELF4 PE=1 SV=1 - [ELF4_HUMAN]	1	Q99607	S151	ETS-related transcription factor Elf-4 (E74-like factor 4) (Myeloid Elf-1-like factor)	ELF4 ELFR MEF																									Reverse	Class I	aGDTsDQEGHSLEEk	1	N-Term(Dimethyl:2H(4)); S5(Phospho); K15(Dimethyl:2H(4))	70	ETD	27	0	1746.77	3	582.927	0.31	36.25	2515
RTYpSDEANQMR	1	T(2): 0.0; Y(3): 0.0; S(4): 100.0	380	Q9BXF6	Rab11 family-interacting protein 5 OS=Homo sapiens GN=RAB11FIP5 PE=1 SV=1 - [RFIP5_HUMAN]	1	Q9BXF6	S307	Rab11 family-interacting protein 5 (Rab11-FIP5) (Gamma-SNAP-associated factor 1) (Gaf-1) (Phosphoprotein pp75) (Rab11-interacting protein Rip11)	RAB11FIP5 GAF1 KIAA0857 RIP11																									Reverse	Class I	rTYsDEANQMR	1	N-Term(Dimethyl); S4(Phospho)	59	ETD	29	1	1478.6	3	493.539	-4.59	45.49	2967
EREDpSGDAEAHAFK	1	S(5): 100.0	380	Q9NPI1	Bromodomain-containing protein 7 OS=Homo sapiens GN=BRD7 PE=1 SV=1 - [BRD7_HUMAN]	1	Q9NPI1	S279	Bromodomain-containing protein 7 (75 kDa bromodomain protein) (Protein CELTIX-1)	BRD7 BP75 CELTIX1																									Reverse	Class I	eREDsGDAEAHAFk	1	N-Term(Dimethyl); S5(Phospho); K14(Dimethyl)	89	ETD	32	1	1697.71	3	566.576	-1.54	47.4	3066
AGGGGGLGAGpSPALSGGQGR	1	S(11): 100.0; S(15): 0.0	380	Q6IQ22	Putative Ras-related protein Rab-12 OS=Homo sapiens GN=RAB12 PE=5 SV=3 - [RAB12_HUMAN]	1	Q6IQ22	S21	Ras-related protein Rab-12	RAB12																									Reverse	Class I	aGGGGGLGAGsPALSGGQGR	1	N-Term(Dimethyl:2H(4)); S11(Phospho)	142	HCD	14	0	1695.81	2	848.407	-2.37	66.02	4936
DSQDASAEQpSDHDDEVASLASASGGFGTK	1	S(2): 0.0; S(6): 0.0; S(10): 100.0; S(18): 0.0; S(21): 0.0; S(23): 0.0; T(28): 0.0	380	Q6P2E9	Enhancer of mRNA-decapping protein 4 OS=Homo sapiens GN=EDC4 PE=1 SV=1 - [EDC4_HUMAN]	1	Q6P2E9	S879	Enhancer of mRNA-decapping protein 4 (Autoantigen Ge-1) (Autoantigen RCD-8) (Human enhancer of decapping large subunit) (Hedls)	EDC4 HEDLS																									Reverse	Class I	dSQDASAEQsDHDDEVASLASASGGFGTk	1	N-Term(Dimethyl); S10(Phospho); K29(Dimethyl)	74	HCD	18-20	0	3018.25	3	1006.76	1.85	81.69	5389
NWTEDMEGGISpSPVK	1	T(3): 0.0; S(11): 0.0; S(12): 100.0	380	P08651	Nuclear factor 1 C-type OS=Homo sapiens GN=NFIC PE=1 SV=2 - [NFIC_HUMAN]	1	P08651	S323	Nuclear factor 1 C-type (NF1-C) (Nuclear factor 1/C) (CCAAT-box-binding transcription factor) (CTF) (Nuclear factor I/C) (NF-I/C) (NFI-C) (TGGCA-binding protein)	NFIC NFI																									Reverse	Class I	nWTEDMEGGISsPVk	1	N-Term(Dimethyl); S12(Phospho); K15(Dimethyl)	76	ETD	14	0	1785.78	3	595.931	0.58	128.01	9645
ERPIpSLGIFPLPAGDGLLTPDAQK	1	S(5): 100.0; T(19): 0.0	379	O60271	C-jun-amino-terminal kinase-interacting protein 4 OS=Homo sapiens GN=SPAG9 PE=1 SV=4 - [JIP4_HUMAN]	1	O60271	S203	C-Jun-amino-terminal kinase-interacting protein 4 (JIP-4) (JNK-interacting protein 4) (Cancer/testis antigen 89) (CT89) (Human lung cancer oncogene 6 protein) (HLC-6) (JNK-associated leucine-zipper protein) (JLP) (Mitogen-activated protein kinase 8-interacting protein 4) (Proliferation-inducing protein 6) (Protein highly expressed in testis) (PHET) (Sperm surface protein) (Sperm-associated antige…	SPAG9 HSS KIAA0516 MAPK8IP4 SYD1 HLC6																									Reverse	Class I	eRPIsLGIFPLPAGDGLLTPDAQk	1	N-Term(Dimethyl); S5(Phospho); K24(Dimethyl)	47	HCD	27	0	2641.4	3	881.139	1.02	149.74	10256
MSPNETLFLEpSTNK	1	S(2): 0.0; T(6): 0.0; S(11): 100.0; T(12): 0.0	379	Q9HB90	Ras-related GTP-binding protein C OS=Homo sapiens GN=RRAGC PE=1 SV=1 - [RRAGC_HUMAN]	1	Q9HB90	S95	Ras-related GTP-binding protein C (Rag C) (RagC) (GTPase-interacting protein 2) (TIB929)	RRAGC																									Reverse	Class I	mSPNETLFLEsTNk	1	N-Term(Dimethyl:2H(4)); S11(Phospho); K14(Dimethyl:2H(4))	102	ETD	14	0	1754.86	3	585.623	1.84	136.36	10294
GAKApSPVAVGSSGAGADPSFQPVLSAR	1	S(5): 100.0; S(11): 0.0; S(12): 0.0; S(19): 0.0; S(25): 0.0	379	Q5TGY3	A.T hook DNA-binding motif-containing protein 1 OS=Homo sapiens GN=AHDC1 PE=1 SV=1 - [AHDC1_HUMAN]	1	Q5TGY3	S896	AT-hook DNA-binding motif-containing protein 1	AHDC1																									Reverse	Class I	gAkAsPVAVGSSGAGADPSFQPVLSAR	1	N-Term(Dimethyl); K3(Dimethyl); S5(Phospho)	77	HCD	27	1	2620.35	3	874.122	14.68	135.84	11286
TSpSGTSLSAMHSSGSSGK	1	T(1): 0.0; S(2): 0.1; S(3): 99.9; T(5): 0.0; S(6): 0.0; S(8): 0.0; S(12): 0.0; S(13): 0.0; S(15): 0.0; S(16): 0.0	379	Q12888	Tumor suppressor p53-binding protein 1 OS=Homo sapiens GN=TP53BP1 PE=1 SV=2 - [TP53B_HUMAN]	1	Q12888	S1317	Tumor suppressor p53-binding protein 1 (53BP1) (p53-binding protein 1) (p53BP1)	TP53BP1																									Reverse	Class I	tSsGTSLSAmHSSGSSGk	1	N-Term(Dimethyl); S3(Phospho); M10(Oxidation); K18(Dimethyl)	101	ETD	28	0	1820.77	3	607.595	-1.2	29.27	2209
RVTQGAApSPGHGIQEK	1	T(3): 0.0; S(8): 100.0	379	Q9HB58	Sp110 nuclear body protein OS=Homo sapiens GN=SP110 PE=1 SV=3 - [SP110_HUMAN]	1	Q9HB58	S380	Sp110 nuclear body protein (Interferon-induced protein 41/75) (Speckled 110 kDa) (Transcriptional coactivator Sp110)	SP110																									Reverse	Class I	rVTQGAAsPGHGIQEk	1	N-Term(Dimethyl); S8(Phospho); K16(Dimethyl)	86	ETD	33	1	1771.88	3	591.299	-0.68	35.25	2467
RSRpSGEGEVSGLMR	1	S(2): 0.0; S(4): 100.0; S(10): 0.0	379	Q13263	Transcription intermediary factor 1-beta OS=Homo sapiens GN=TRIM28 PE=1 SV=5 - [TIF1B_HUMAN]	1	Q13263	S473	Transcription intermediary factor 1-beta (TIF1-beta) (E3 SUMO-protein ligase TRIM28) (EC 6.3.2.-) (KRAB-associated protein 1) (KAP-1) (KRAB-interacting protein 1) (KRIP-1) (Nuclear corepressor KAP-1) (RING finger protein 96) (Tripartite motif-containing protein 28)	TRIM28 KAP1 RNF96 TIF1B																									Reverse	Class I	rSRsGEGEVSGLmR	1	N-Term(Dimethyl); S4(Phospho); M13(Oxidation)	93	ETD	35	2	1644.75	3	548.922	0.06	42.52	2855
AIKVEQATKPpSFESGR	1	T(8): 0.0; S(11): 100.0; S(14): 0.0	379	P38159	Heterogeneous nuclear ribonucleoprotein G OS=Homo sapiens GN=RBMX PE=1 SV=3 - [HNRPG_HUMAN]	1	P38159	S88	RNA-binding motif protein, X chromosome (Glycoprotein p43) (Heterogeneous nuclear ribonucleoprotein G) (hnRNP G) [Cleaved into: RNA-binding motif protein, X chromosome, N-terminally processed]	RBMX HNRPG RBMXP1																									Reverse	Class I	aIkVEQATkPsFESGR	1	N-Term(Dimethyl); K3(Dimethyl); K9(Dimethyl); S11(Phospho)	77	ETD	31	1	1911.99	3	638	-4.21	66.86	3999
EAQTLDSQIQETpSI	1	T(4): 0.0; S(7): 0.0; T(12): 0.0; S(13): 100.0	379	P27816	Microtubule-associated protein 4 OS=Homo sapiens GN=MAP4 PE=1 SV=2 - [MAP4_HUMAN]	1	P27816	S1151	Microtubule-associated protein 4 (MAP-4)	MAP4																									Reverse	Class I	eAQTLDSQIQETsI	1	N-Term(Dimethyl); S13(Phospho)	82	ETD	6	0	1670.75	3	557.589	0.29	75.27	5447
SFSLASSSNpSPISQR	1	S(1): 0.0; S(3): 0.0; S(6): 0.0; S(7): 0.0; S(8): 0.0; S(10): 100.0; S(13): 0.0	379	Q9BXB4	Oxysterol-binding protein-related protein 11 OS=Homo sapiens GN=OSBPL11 PE=1 SV=2 - [OSB11_HUMAN]	1	Q9BXB4	S181	Oxysterol-binding protein-related protein 11 (ORP-11) (OSBP-related protein 11)	OSBPL11 ORP11 OSBP12																									Reverse	Class I	sFSLASSSNsPISQR	1	N-Term(Dimethyl:2H(4)); S10(Phospho)	85	ETD	14	0	1679.8	3	560.603	1.16	105.31	8065
ASTApSPCNNNINAATAVALQEPR	1	S(2): 0.0; T(3): 0.0; S(5): 100.0; T(15): 0.0	379	Q71RC2	La-related protein 4 OS=Homo sapiens GN=LARP4 PE=1 SV=3 - [LARP4_HUMAN]	1	Q71RC2	S597	La-related protein 4 (La ribonucleoprotein domain family member 4)	LARP4 PP13296																									Reverse	Class I	aSTAsPcNNNINAATAVALQEPR	1	N-Term(Dimethyl:2H(4)); S5(Phospho); C7(Carbamidomethyl)	72	HCD	13	0	2482.16	3	828.058	-4.22	121.4	8886
NVPQEESLEDpSDVDADFK	1	S(7): 0.0; S(11): 100.0	379	O00505	Importin subunit alpha-3 OS=Homo sapiens GN=KPNA3 PE=1 SV=2 - [IMA3_HUMAN]	1	O00505	S60	Importin subunit alpha-3 (Importin alpha Q2) (Qip2) (Karyopherin subunit alpha-3) (SRP1-gamma)	KPNA3 QIP2																									Reverse	Class I	nVPQEESLEDsDVDADFk	1	N-Term(Dimethyl:2H(4)); S11(Phospho); K18(Dimethyl:2H(4))	81	ETD	13	0	2180.97	3	727.662	-0.18	123.09	9001
ApSPVAVGSSGAGADPSFQPVLSAR	1	S(2): 100.0; S(8): 0.0; S(9): 0.0; S(16): 0.0; S(22): 0.0	379	Q5TGY3	A.T hook DNA-binding motif-containing protein 1 OS=Homo sapiens GN=AHDC1 PE=1 SV=1 - [AHDC1_HUMAN]	1	Q5TGY3	S896	AT-hook DNA-binding motif-containing protein 1	AHDC1																									Reverse	Class I	asPVAVGSSGAGADPSFQPVLSAR	1	N-Term(Dimethyl:2H(4)); S2(Phospho)	42	HCD	13	0	2340.15	3	780.723	0.38	131.97	9611
THTTALAGRpSPpSPASGR	2	T(1): 0.0; T(3): 0.0; T(4): 0.0; S(10): 100.0; S(12): 100.0; S(15): 0.0	378	Q9UQ35	Serine/arginine repetitive matrix protein 2 OS=Homo sapiens GN=SRRM2 PE=1 SV=2 - [SRRM2_HUMAN]	1	Q9UQ35	S295, S297	Serine/arginine repetitive matrix protein 2 (300 kDa nuclear matrix antigen) (Serine/arginine-rich splicing factor-related nuclear matrix protein of 300 kDa) (SR-related nuclear matrix protein of 300 kDa) (Ser/Arg-related nuclear matrix protein of 300 kDa) (Splicing coactivator subunit SRm300) (Tax-responsive enhancer element-binding protein 803) (TaxREB803)	SRRM2 KIAA0324 SRL300 SRM300 HSPC075																									Reverse	Class I	tHTTALAGRsPsPASGR	1	N-Term(Dimethyl); S10(Phospho); S12(Phospho)	90	ETD	30	1	1854.82	3	618.946	-1.3	37.62	2639
EVDATpSPAPpSTSSTVK	2	T(5): 2.7; S(6): 97.3; S(10): 100.0; T(11): 0.0; S(12): 0.0; S(13): 0.0; T(14): 0.0	378	Q16666	Gamma-interferon-inducible protein Ifi-16 OS=Homo sapiens GN=IFI16 PE=1 SV=3 - [IF16_HUMAN]	1	Q16666	S106, S110	Gamma-interferon-inducible protein 16 (Ifi-16) (Interferon-inducible myeloid differentiation transcriptional activator)	IFI16 IFNGIP1																									Reverse	Class I	eVDATsPAPsTSSTVk	1	N-Term(Dimethyl:2H(4)); S6(Phospho); S10(Phospho); K16(Dimethyl:2H(4))	85	ETD	7	0	1800.82	3	600.943	0.05	37.95	2732
KKPSpSEERETEISLK	1	S(4): 0.0; S(5): 100.0; T(10): 0.0; S(13): 0.0	378	O75475	PC4 and SFRS1-interacting protein OS=Homo sapiens GN=PSIP1 PE=1 SV=1 - [PSIP1_HUMAN]	1	O75475	S514	PC4 and SFRS1-interacting protein (CLL-associated antigen KW-7) (Dense fine speckles 70 kDa protein) (DFS 70) (Lens epithelium-derived growth factor) (Transcriptional coactivator p75/p52)	PSIP1 DFS70 LEDGF PSIP2																									Reverse	Class I	kkPSsEERETEISLk	1	K1(Dimethyl); N-Term(Dimethyl); K2(Dimethyl); S5(Phospho); K15(Dimethyl)	85	ETD	36	2	1953.03	3	651.681	-1.46	45.66	2976
GKGGVTGSPEASISGpSKGDLK	1	T(6): 0.0; S(8): 0.0; S(12): 0.0; S(14): 0.0; S(16): 100.0	378	Q09666	Neuroblast differentiation-associated protein AHNAK OS=Homo sapiens GN=AHNAK PE=1 SV=2 - [AHNK_HUMAN]	1	Q09666	S5739	Neuroblast differentiation-associated protein AHNAK (Desmoyokin)	AHNAK PM227																									Reverse	Class I	gkGGVTGSPEASISGskGDLk	1	N-Term(Dimethyl); K2(Dimethyl); S16(Phospho); K17(Dimethyl); K21(Dimethyl)	83	ETD	31	2	2124.09	3	708.702	-0.99	62.65	3921
HGARTpSDSDQQAYLVQR	1	T(5): 0.0; S(6): 100.0; S(8): 0.0; Y(13): 0.0	378	Q96CV9	Optineurin OS=Homo sapiens GN=OPTN PE=1 SV=1 - [OPTN_HUMAN]	1	Q96CV9	S526	Optineurin (E3-14.7K-interacting protein) (FIP-2) (Huntingtin yeast partner L) (Huntingtin-interacting protein 7) (HIP-7) (Huntingtin-interacting protein L) (NEMO-related protein) (Optic neuropathy-inducing protein) (Transcription factor IIIA-interacting protein) (TFIIIA-IntP)	OPTN FIP2 GLC1E HIP7 HYPL NRP																									Reverse	Class I	hGARTsDSDQQAYLVQR	1	N-Term(Dimethyl); S6(Phospho)	115	ETD	34	1	2039.93	3	680.648	-0.2	59.25	3925
RTEpSVPSDINNPVDR	1	T(2): 0.0; S(4): 100.0; S(7): 0.0	378	Q8IVT5	Kinase suppressor of Ras 1 OS=Homo sapiens GN=KSR1 PE=1 SV=2 - [KSR1_HUMAN]	1	Q8IVT5	S404	Kinase suppressor of Ras 1	KSR1 KSR																									Reverse	Class I	rTEsVPSDINNPVDR	1	N-Term(Dimethyl); S4(Phospho)	65	ETD	28	1	1806.84	3	602.95	-0.93	70.88	4980
QNpSLHGSFHSADVLK	1	S(3): 100.0; S(7): 0.0; S(10): 0.0	378	Q9NSY1	BMP-2-inducible protein kinase OS=Homo sapiens GN=BMP2K PE=1 SV=2 - [BMP2K_HUMAN]	1	Q9NSY1	S1107	BMP-2-inducible protein kinase (BIKe) (EC 2.7.11.1)	BMP2K BIKE HRIHFB2017																									Reverse	Class I	qNsLHGSFHSADVLk	1	N-Term(Dimethyl); S3(Phospho); K15(Dimethyl)	89	ETD	31	0	1775.85	3	592.62	-1.37	85.26	5098
RSApSTEKLEQGTSALIR	1	S(2): 0.0; S(4): 100.0; T(5): 0.0; T(12): 0.0; S(13): 0.0	378	Q8IWC1	MAP7 domain-containing protein 3 OS=Homo sapiens GN=MAP7D3 PE=1 SV=2 - [MA7D3_HUMAN]	1	Q8IWC1	S185	MAP7 domain-containing protein 3	MAP7D3																									Reverse	Class I	rSAsTEkLEQGTSALIR	1	N-Term(Dimethyl:2H(4)); S4(Phospho); K7(Dimethyl:2H(4))	100	ETD	32	2	1991.08	3	664.364	0.35	91.41	5272
KFLEESVSMpSPEER	1	S(6): 0.0; S(8): 0.0; S(10): 100.0	378	P15374	Ubiquitin carboxyl-terminal hydrolase isozyme L3 OS=Homo sapiens GN=UCHL3 PE=1 SV=1 - [UCHL3_HUMAN]	1	P15374	S130	Ubiquitin carboxyl-terminal hydrolase isozyme L3 (UCH-L3) (EC 3.4.19.12) (Ubiquitin thioesterase L3)	UCHL3																									Reverse	Class I	kFLEESVSmsPEER	1	K1(Dimethyl); N-Term(Dimethyl); M9(Oxidation); S10(Phospho)	79	ETD	29	1	1819.82	3	607.277	-0.94	77.19	5352
RKPpSVPDSASPADDSFVDPGER	1	S(4): 100.0; S(8): 0.0; S(10): 0.0; S(15): 0.0	378	P16333	Cytoplasmic protein NCK1 OS=Homo sapiens GN=NCK1 PE=1 SV=1 - [NCK1_HUMAN]	1	P16333	S85	Cytoplasmic protein NCK1 (NCK adaptor protein 1) (Nck-1) (SH2/SH3 adaptor protein NCK-alpha)	NCK1 NCK																									Reverse	Class I	rkPsVPDSASPADDSFVDPGER	1	N-Term(Dimethyl); K2(Dimethyl); S4(Phospho)	83	HCD	32	1	2465.14	3	822.383	0.4	87.97	5384
LPDpSDDDEDEETAIQR	1	S(4): 100.0; T(12): 0.0	378	Q96K21	Zinc finger FYVE domain-containing protein 19 OS=Homo sapiens GN=ZFYVE19 PE=1 SV=2 - [ZFY19_HUMAN]	1	Q96K21	S354	Zinc finger FYVE domain-containing protein 19 (MLL partner containing FYVE domain)	ZFYVE19 MPFYVE																									Reverse	Class I	lPDsDDDEDEETAIQR	1	N-Term(Dimethyl); S4(Phospho)	85	ETD	13	0	1955.77	3	652.596	-0.46	76.93	5663
DVMSDETNNEETEpSPSQEFVNITK	1	S(4): 0.0; T(7): 0.0; T(12): 0.0; S(14): 100.0; S(16): 0.0; T(23): 0.0	378	P46821	Microtubule-associated protein 1B OS=Homo sapiens GN=MAP1B PE=1 SV=1 - [MAP1B_HUMAN]	1	P46821	S1154	Microtubule-associated protein 1B (MAP-1B) [Cleaved into: MAP1 light chain LC1]	MAP1B																									Reverse	Class I	dVmSDETNNEETEsPSQEFVNITk	1	N-Term(Dimethyl:2H(4)); M3(Oxidation); S14(Phospho); K24(Dimethyl:2H(4))	83	HCD	12	0	2903.26	3	968.426	-0.09	84.31	6480
SQLDDHPEpSDDEENFIDANDDEDMEK	1	S(1): 0.0; S(9): 100.0	378	Q03701	CCAAT/enhancer-binding protein zeta OS=Homo sapiens GN=CEBPZ PE=1 SV=2 - [CEBPZ_HUMAN]	1	Q03701	S629	CCAAT/enhancer-binding protein zeta (CCAAT-box-binding transcription factor) (CBF) (CCAAT-binding factor)	CEBPZ CBF2																									Reverse	Class I	sQLDDHPEsDDEENFIDANDDEDmEk	1	N-Term(Dimethyl:2H(4)); S9(Phospho); M24(Oxidation); K26(Dimethyl:2H(4))	68	HCD	26	0	3212.25	3	1071.42	0.39	108.03	7477
VRVEpSGYFSLEK	1	S(5): 100.0; Y(7): 0.0; S(9): 0.0	378	Q6WCQ1	Myosin phosphatase Rho-interacting protein OS=Homo sapiens GN=MPRIP PE=1 SV=2 - [MPRIP_HUMAN]	1	Q6WCQ1	S264	Myosin phosphatase Rho-interacting protein (M-RIP) (Rho-interacting protein 3) (RIP3) (p116Rip)	MPRIP KIAA0864 MRIP RHOIP3																									Reverse	Class I	vRVEsGYFSLEk	1	N-Term(Dimethyl); S5(Phospho); K12(Dimethyl)	68	ETD	29	1	1549.76	3	517.26	-1.44	123.73	8136
RLNNDLVGpSTENLLK	1	S(9): 99.9; T(10): 0.1	378	Q8N5G2	Macoilin OS=Homo sapiens GN=TMEM57 PE=2 SV=1 - [MACOI_HUMAN]	1	Q8N5G2	S305	Macoilin (Transmembrane protein 57)	TMEM57																									Reverse	Class I	rLNNDLVGsTENLLk	1	N-Term(Dimethyl:2H(4)); S9(Phospho); K15(Dimethyl:2H(4))	75	ETD	29	1	1830	3	610.67	-0.64	129.97	8519
TLAGMGLQPGNIpSPTSK	1	T(1): 0.0; S(13): 100.0; T(15): 0.0; S(16): 0.0	378	P24723	Protein kinase C eta type OS=Homo sapiens GN=PRKCH PE=1 SV=3 - [KPCL_HUMAN]	1	P24723	S317	Protein kinase C eta type (EC 2.7.11.13) (PKC-L) (nPKC-eta)	PRKCH PKCL PRKCL																									Reverse	Class I	tLAGMGLQPGNIsPTSk	1	N-Term(Dimethyl); S13(Phospho); K17(Dimethyl)	80	ETD	14	0	1807.91	3	603.307	2.93	121.16	9153
QMNMpSPPPGNAGPVIMSIEEK	1	S(5): 100.0; S(17): 0.0	377	Q86U42	Polyadenylate-binding protein 2 OS=Homo sapiens GN=PABPN1 PE=1 SV=3 - [PABP2_HUMAN]	1	Q86U42	S150	Polyadenylate-binding protein 2 (PABP-2) (Poly(A)-binding protein 2) (Nuclear poly(A)-binding protein 1) (Poly(A)-binding protein II) (PABII) (Polyadenylate-binding nuclear protein 1)	PABPN1 PAB2 PABP2																									Reverse	Class I	qMNMsPPPGNAGPVIMSIEEk	1	N-Term(Dimethyl); S5(Phospho); K21(Dimethyl)	75	HCD	14	0	2363.09	3	788.368	1.47	141.9	10762
TIpSAQDTLAYATALLNEK	1	T(1): 0.0; S(3): 100.0; T(7): 0.0; Y(10): 0.0; T(12): 0.0	377	Q9UPU5	Ubiquitin carboxyl-terminal hydrolase 24 OS=Homo sapiens GN=USP24 PE=1 SV=2 - [UBP24_HUMAN]	1	Q9UPU5	S1811	Ubiquitin carboxyl-terminal hydrolase 24 (EC 3.4.19.12) (Deubiquitinating enzyme 24) (Ubiquitin thioesterase 24) (Ubiquitin-specific-processing protease 24)	USP24 KIAA1057																									Reverse	Class I	tIsAQDTLAYATALLNEk	1	N-Term(Dimethyl); S3(Phospho); K18(Dimethyl)	110	ETD	13	0	2059.04	3	687.018	0.99	152.47	11146
FEEESKEPVADEEEEDpSDDDVEPITEFR	1	S(5): 0.0; S(17): 100.0; T(25): 0.0	377	P54105	Methylosome subunit pICln OS=Homo sapiens GN=CLNS1A PE=1 SV=1 - [ICLN_HUMAN]	1	P54105	S102	Methylosome subunit pICln (Chloride channel, nucleotide sensitive 1A) (Chloride conductance regulatory protein ICln) (I(Cln)) (Chloride ion current inducer protein) (ClCI) (Reticulocyte pICln)	CLNS1A CLCI ICLN																									Reverse	Class I	fEEESkEPVADEEEEDsDDDVEPITEFR	1	N-Term(Dimethyl:2H(4)); K6(Dimethyl:2H(4)); S17(Phospho)	65	HCD	27	1	3458.46	3	1153.49	-0.51	139.36	11899
RAGDLLEDpSPKRPK	1	S(9): 100.0	377	P51858	Hepatoma-derived growth factor OS=Homo sapiens GN=HDGF PE=1 SV=1 - [HDGF_HUMAN]	1	P51858	S165	Hepatoma-derived growth factor (HDGF) (High mobility group protein 1-like 2) (HMG-1L2)	HDGF HMG1L2																									Reverse	Class I	rAGDLLEDsPkRPk	1	N-Term(Dimethyl); S9(Phospho); K11(Dimethyl); K14(Dimethyl)	71	ETD	38	2	1745.93	3	582.649	0.57	41.88	2816
HSGSDRSpSFSHYSGLK	1	S(2): 0.0; S(4): 0.0; S(7): 0.0; S(8): 100.0; S(10): 0.0; Y(12): 0.0; S(13): 0.0	377	Q8NC51	Plasminogen activator inhibitor 1 RNA-binding protein OS=Homo sapiens GN=SERBP1 PE=1 SV=2 - [PAIRB_HUMAN]	1	Q8NC51	S203	Plasminogen activator inhibitor 1 RNA-binding protein (PAI1 RNA-binding protein 1) (PAI-RBP1) (SERPINE1 mRNA-binding protein 1)	SERBP1 PAIRBP1 CGI-55																									Reverse	Class I	hSGSDRSsFSHYSGLk	1	N-Term(Dimethyl); S8(Phospho); K16(Dimethyl)	86	ETD	40	1	1887.84	3	629.951	-0.08	45.94	3032
LGHSLpSVSKDSISR	1	S(4): 0.0; S(6): 100.0; S(8): 0.0; S(11): 0.0; S(13): 0.0	377	Q9P266	Uncharacterized protein KIAA1462 OS=Homo sapiens GN=KIAA1462 PE=2 SV=3 - [K1462_HUMAN]	1	Q9P266	S1319	Junctional protein associated with coronary artery disease (JCAD)	KIAA1462 JCAD																									Reverse	Class I	lGHSLsVSkDSISR	1	N-Term(Dimethyl); S6(Phospho); K9(Dimethyl)	93	ETD	32	1	1621.83	3	541.282	0.71	67.56	4297
RKpSTLYFNTQEK	1	S(3): 100.0; T(4): 0.0; Y(6): 0.0; T(9): 0.0	377	Q92521	GPI mannosyltransferase 3 OS=Homo sapiens GN=PIGB PE=2 SV=1 - [PIGB_HUMAN]	1	Q92521	S39	GPI mannosyltransferase 3 (EC 2.4.1.-) (GPI mannosyltransferase III) (GPI-MT-III) (Phosphatidylinositol-glycan biosynthesis class B protein) (PIG-B)	PIGB																									Reverse	Class I	rksTLYFNTQEk	1	N-Term(Dimethyl); K2(Dimethyl); S3(Phospho); K12(Dimethyl)	95	ETD	33	2	1678.85	3	560.29	-1.29	73.94	4605
EAEEEpSpSGGEEEDEDENIEVVYSK	2	S(6): 100.0; S(7): 100.0; Y(22): 0.0; S(23): 0.0	377	P55010	Eukaryotic translation initiation factor 5 OS=Homo sapiens GN=EIF5 PE=1 SV=2 - [IF5_HUMAN]	1	P55010	S389, S390	Eukaryotic translation initiation factor 5 (eIF-5)	EIF5																									Reverse	Class I	eAEEEssGGEEEDEDENIEVVYSk	1	N-Term(Dimethyl); S6(Phospho); S7(Phospho); K24(Dimethyl)	59	HCD	7	0	2918.1	3	973.372	2.99	79.36	5489
ASQpSRPNSSALETLGGEK	1	S(2): 0.0; S(4): 100.0; S(8): 0.0; S(9): 0.0; T(13): 0.0	377	O94804	Serine/threonine-protein kinase 10 OS=Homo sapiens GN=STK10 PE=1 SV=1 - [STK10_HUMAN]	1	O94804	S450	Serine/threonine-protein kinase 10 (EC 2.7.11.1) (Lymphocyte-oriented kinase)	STK10 LOK																									Reverse	Class I	aSQsRPNSSALETLGGEk	1	N-Term(Dimethyl:2H(4)); S4(Phospho); K18(Dimethyl:2H(4))	109	ETD	28	0	1975.99	3	659.334	-2.9	89.41	6099
IFFDpTDDDDDMPHSTSR	1	T(5): 100.0; S(14): 0.0; T(15): 0.0; S(16): 0.0	377	Q8NG27	E3 ubiquitin-protein ligase Praja1 OS=Homo sapiens GN=PJA1 PE=1 SV=2 - [PJA1_HUMAN]	1	Q8NG27	T277	E3 ubiquitin-protein ligase Praja-1 (Praja1) (EC 6.3.2.-) (RING finger protein 70)	PJA1 RNF70																									Reverse	Class I	iFFDtDDDDDMPHSTSR	1	N-Term(Dimethyl:2H(4)); T5(Phospho)	75	ETD	28	0	2125.81	3	709.274	-13.67	116.44	7640
EARNpSWDSPAFSNDVIR	1	S(5): 100.0; S(8): 0.0; S(12): 0.0	377	Q6DN90	IQ motif and SEC7 domain-containing protein 1 OS=Homo sapiens GN=IQSEC1 PE=1 SV=1 - [IQEC1_HUMAN]	1	Q6DN90	S512	IQ motif and SEC7 domain-containing protein 1 (ADP-ribosylation factors guanine nucleotide-exchange protein 100) (ADP-ribosylation factors guanine nucleotide-exchange protein 2) (Brefeldin-resistant Arf-GEF 2 protein)	IQSEC1 ARFGEP100 BRAG2 KIAA0763																									Reverse	Class I	eARNsWDSPAFSNDVIR	1	N-Term(Dimethyl:2H(4)); S5(Phospho)	77	ETD	28	1	2075.95	3	692.655	0.89	126.61	8143
ERPISLGIFPLPAGDGLLpTPDAQK	1	S(5): 0.0; T(19): 100.0	377	O60271	C-jun-amino-terminal kinase-interacting protein 4 OS=Homo sapiens GN=SPAG9 PE=1 SV=4 - [JIP4_HUMAN]	1	O60271	T217	C-Jun-amino-terminal kinase-interacting protein 4 (JIP-4) (JNK-interacting protein 4) (Cancer/testis antigen 89) (CT89) (Human lung cancer oncogene 6 protein) (HLC-6) (JNK-associated leucine-zipper protein) (JLP) (Mitogen-activated protein kinase 8-interacting protein 4) (Proliferation-inducing protein 6) (Protein highly expressed in testis) (PHET) (Sperm surface protein) (Sperm-associated antige…	SPAG9 HSS KIAA0516 MAPK8IP4 SYD1 HLC6																									Reverse	Class I	eRPISLGIFPLPAGDGLLtPDAQk	1	N-Term(Dimethyl); T19(Phospho); K24(Dimethyl)	57	HCD	28	0	2641.4	3	881.139	0.54	150.36	9740
HLNSSQPSGFGPANpSLEDVVR	1	S(4): 0.0; S(5): 0.0; S(8): 0.0; S(15): 100.0	376	Q52LW3	Rho GTPase-activating protein 29 OS=Homo sapiens GN=ARHGAP29 PE=1 SV=2 - [RHG29_HUMAN]	1	Q52LW3	S499	Rho GTPase-activating protein 29 (PTPL1-associated RhoGAP protein 1) (Rho-type GTPase-activating protein 29)	ARHGAP29 PARG1																									Reverse	Class I	hLNSSQPSGFGPANsLEDVVR	1	N-Term(Dimethyl:2H(4)); S15(Phospho)	68	HCD	30	0	2323.1	3	775.039	0	132.48	10944
MSEpSPTPCSGSSFEETEALVNTAAK	1	S(2): 0.6; S(4): 98.8; T(6): 0.6; S(9): 0.0; S(11): 0.0; S(12): 0.0; T(16): 0.0; T(22): 0.0	376	O95359	Transforming acidic coiled-coil-containing protein 2 OS=Homo sapiens GN=TACC2 PE=1 SV=3 - [TACC2_HUMAN]	1	O95359	S2569	Transforming acidic coiled-coil-containing protein 2 (Anti-Zuai-1) (AZU-1)	TACC2																									Reverse	Class I	mSEsPTPcSGSSFEETEALVNTAAk	1	N-Term(Dimethyl); S4(Phospho); C8(Carbamidomethyl); K25(Dimethyl)	69	HCD	13	0	2766.19	3	922.735	0.42	141.95	11487
NRpSAEEGELAESK	1	S(3): 100.0; S(12): 0.0	376	Q9C0C2	182 kDa tankyrase 1-binding protein OS=Homo sapiens GN=TNKS1BP1 PE=1 SV=3 - [TB182_HUMAN]	1	Q9C0C2	S1666	182 kDa tankyrase-1-binding protein	TNKS1BP1 KIAA1741 TAB182																									Reverse	Class I	nRsAEEGELAESk	1	N-Term(Dimethyl:2H(4)); S3(Phospho); K13(Dimethyl:2H(4))	84	ETD	29	1	1563.74	3	521.919	-4.98	39.03	2592
EPAITSQNpSPEAR	1	T(5): 0.0; S(6): 0.0; S(9): 100.0	376	P23193	Transcription elongation factor A protein 1 OS=Homo sapiens GN=TCEA1 PE=1 SV=2 - [TCEA1_HUMAN]	1	P23193	S100	Transcription elongation factor A protein 1 (Transcription elongation factor S-II protein 1) (Transcription elongation factor TFIIS.o)	TCEA1 GTF2S TFIIS																									Reverse	Class I	ePAITSQNsPEAR	1	N-Term(Dimethyl); S9(Phospho)	97	ETD	14	0	1507.68	3	503.231	0.41	43.9	3145
QSVVYGGKpSpTIRDR	2	S(2): 0.0; Y(5): 0.0; S(9): 100.0; T(10): 100.0	376	Q8WWY3	U4/U6 small nuclear ribonucleoprotein Prp31 OS=Homo sapiens GN=PRPF31 PE=1 SV=2 - [PRP31_HUMAN]	1	Q8WWY3	S439, T440	U4/U6 small nuclear ribonucleoprotein Prp31 (Pre-mRNA-processing factor 31) (Serologically defined breast cancer antigen NY-BR-99) (U4/U6 snRNP 61 kDa protein) (Protein 61K) (hPrp31)	PRPF31 PRP31																									Reverse	Class I	qSVVYGGkstIRDR	1	N-Term(Dimethyl); K8(Dimethyl); S9(Phospho); T10(Phospho)	63	ETD	29	2	1781.83	3	594.614	-3.77	51.3	3310
KASLQSGQEGAGDpSPGSQFSK	1	S(3): 0.0; S(6): 0.0; S(14): 100.0; S(17): 0.0; S(20): 0.0	376	Q12778	Forkhead box protein O1 OS=Homo sapiens GN=FOXO1 PE=1 SV=2 - [FOXO1_HUMAN]	1	Q12778	S287	Forkhead box protein O1 (Forkhead box protein O1A) (Forkhead in rhabdomyosarcoma)	FOXO1 FKHR FOXO1A																									Reverse	Class I	kASLQSGQEGAGDsPGSQFSk	1	N-Term(Dimethyl:2H(4)); K1(Dimethyl:2H(4)); S14(Phospho); K21(Dimethyl:2H(4))	107	ETD	29	1	2242.11	3	748.042	-1.14	59.86	4265
LFEEpSDDKEDEDADGK	1	S(5): 100.0	376	O43719	HIV Tat-specific factor 1 OS=Homo sapiens GN=HTATSF1 PE=1 SV=1 - [HTSF1_HUMAN]	1	O43719	S676	HIV Tat-specific factor 1 (Tat-SF1)	HTATSF1																									Reverse	Class I	lFEEsDDkEDEDADGk	1	N-Term(Dimethyl:2H(4)); S5(Phospho); K8(Dimethyl:2H(4)); K16(Dimethyl:2H(4))	79	ETD	26	1	2017.89	3	673.303	1.29	62.89	4544
SCpSEEKIPEDGSLNTTK	1	S(1): 0.0; S(3): 100.0; S(12): 0.0; T(15): 0.0; T(16): 0.0	376	P37173	TGF-beta receptor type-2 OS=Homo sapiens GN=TGFBR2 PE=1 SV=2 - [TGFR2_HUMAN]	1	P37173	S553	TGF-beta receptor type-2 (TGFR-2) (EC 2.7.11.30) (TGF-beta type II receptor) (Transforming growth factor-beta receptor type II) (TGF-beta receptor type II) (TbetaR-II)	TGFBR2																									Reverse	Class I	scsEEkIPEDGSLNTTk	1	N-Term(Dimethyl:2H(4)); C2(Carbamidomethyl); S3(Phospho); K6(Dimethyl:2H(4)); K17(Dimethyl:2H(4))	94	ETD	27	1	2071	3	691.005	-1.72	69.91	4687
LGEApSDSELADADK	1	S(5): 100.0; S(7): 0.0	376	Q5SW79	Centrosomal protein of 170 kDa OS=Homo sapiens GN=CEP170 PE=1 SV=1 - [CE170_HUMAN]	1	Q5SW79	S1112	Centrosomal protein of 170 kDa (Cep170) (KARP-1-binding protein) (KARP1-binding protein)	CEP170 FAM68A KAB KIAA0470																									Reverse	Class I	lGEAsDSELADADk	1	N-Term(Dimethyl:2H(4)); S5(Phospho); K14(Dimethyl:2H(4))	89	ETD	13	0	1564.72	3	522.246	0.33	83.86	6198
RApSPNSDDTVLSPQELQK	1	S(3): 100.0; S(6): 0.0; T(9): 0.0; S(12): 0.0	376	Q9UH62	Armadillo repeat-containing X-linked protein 3 OS=Homo sapiens GN=ARMCX3 PE=1 SV=1 - [ARMX3_HUMAN]	1	Q9UH62	S110	Armadillo repeat-containing X-linked protein 3 (ARM protein lost in epithelial cancers on chromosome X 3) (Protein ALEX3)	ARMCX3 ALEX3 BM-017 UNQ2517/PRO6007																									Reverse	Class I	rAsPNSDDTVLSPQELQk	1	N-Term(Dimethyl); S3(Phospho); K18(Dimethyl)	90	ETD	28	1	2121.02	3	707.679	-0.41	94.9	6461
DVMpSDETNNEETESPSQEFVNITK	1	S(4): 100.0; T(7): 0.0; T(12): 0.0; S(14): 0.0; S(16): 0.0; T(23): 0.0	376	P46821	Microtubule-associated protein 1B OS=Homo sapiens GN=MAP1B PE=1 SV=1 - [MAP1B_HUMAN]	1	P46821	S1144	Microtubule-associated protein 1B (MAP-1B) [Cleaved into: MAP1 light chain LC1]	MAP1B																									Reverse	Class I	dVmsDETNNEETESPSQEFVNITk	1	N-Term(Dimethyl); M3(Oxidation); S4(Phospho); K24(Dimethyl)	61	HCD	12	0	2895.21	3	965.741	-1.05	85.88	6616
LGAPENSGISpTLER	1	S(7): 0.0; S(10): 0.0; T(11): 100.0	376	Q9Y4F1	FERM, RhoGEF and pleckstrin domain-containing protein 1 OS=Homo sapiens GN=FARP1 PE=1 SV=1 - [FARP1_HUMAN]	1	Q9Y4F1	T24	FERM, RhoGEF and pleckstrin domain-containing protein 1 (Chondrocyte-derived ezrin-like protein) (Pleckstrin homology domain-containing family C member 2) (PH domain-containing family C member 2)	FARP1 CDEP PLEKHC2																									Reverse	Class I	lGAPENSGIStLER	1	N-Term(Dimethyl); T11(Phospho)	91	ETD	14	0	1551.74	3	517.919	1.09	97.26	7446
RTPpSDDEEDNLFAPPK	1	T(2): 0.0; S(4): 100.0	376	Q641Q2;Q9Y4E1	Protein FAM21A OS=Homo sapiens GN=FAM21A PE=1 SV=3 - [FA21A_HUMAN]|Protein FAM21C OS=Homo sapiens GN=FAM21C PE=1 SV=2 - [FA21C_HUMAN]	2	Q641Q2	S333	WASH complex subunit FAM21A	FAM21A	Q9Y4E1	S333	WASH complex subunit FAM21C (Vaccinia virus penetration factor) (VPEF)	FAM21C KIAA0592																					Reverse	Class I	rTPsDDEEDNLFAPPk	1	N-Term(Dimethyl:2H(4)); S4(Phospho); K16(Dimethyl:2H(4))	76	ETD	28	1	1974.92	3	658.98	-2.83	113.44	7519
TVIRLPSGSGAApSPTGSAVDIR	1	T(1): 0.0; S(7): 0.0; S(9): 0.0; S(13): 100.0; T(15): 0.0; S(17): 0.0	376	Q09666	Neuroblast differentiation-associated protein AHNAK OS=Homo sapiens GN=AHNAK PE=1 SV=2 - [AHNK_HUMAN]	1	Q09666	S216	Neuroblast differentiation-associated protein AHNAK (Desmoyokin)	AHNAK PM227																									Reverse	Class I	tVIRLPSGSGAAsPTGSAVDIR	2	N-Term(Dimethyl:2H(4)); S13(Phospho)	107	ETD	28	1	2224.16	3	742.059	0.08	121.28	7981
VTGTEGSSSTLVDYTSTSSTGGpSPVRK	1	T(2): 0.0; T(4): 0.0; S(7): 0.0; S(8): 0.0; S(9): 0.0; T(10): 0.0; Y(14): 0.0; T(15): 0.0; S(16): 0.0; T(17): 0.0; S(18): 0.0; S(19): 0.0; T(20): 0.0; S(23): 100.0	376	Q7Z6E9	Retinoblastoma-binding protein 6 OS=Homo sapiens GN=RBBP6 PE=1 SV=1 - [RBBP6_HUMAN]	1	Q7Z6E9	S1277	E3 ubiquitin-protein ligase RBBP6 (EC 6.3.2.-) (Proliferation potential-related protein) (Protein P2P-R) (Retinoblastoma-binding Q protein 1) (RBQ-1) (Retinoblastoma-binding protein 6) (p53-associated cellular protein of testis)	RBBP6 P2PR PACT RBQ1 My038																									Reverse	Class I	vTGTEGSSSTLVDYTSTSSTGGsPVRk	1	N-Term(Dimethyl:2H(4)); S23(Phospho); K27(Dimethyl:2H(4))	66	HCD	27	1	2805.37	3	935.793	0.51	96.89	8098
GLRDSHpSpSEEDEASSQTDLSQTISK	2	S(5): 0.0; S(7): 100.0; S(8): 100.0; S(14): 0.0; S(15): 0.0; T(17): 0.0; S(20): 0.0; T(22): 0.0; S(24): 0.0	376	Q5JTV8	Torsin-1A-interacting protein 1 OS=Homo sapiens GN=TOR1AIP1 PE=1 SV=2 - [TOIP1_HUMAN]	1	Q5JTV8	S156, S157	Torsin-1A-interacting protein 1 (Lamin-associated protein 1B) (LAP1B)	TOR1AIP1																									Reverse	Class I	gLRDSHssEEDEASSQTDLSQTISk	1	N-Term(Dimethyl); S7(Phospho); S8(Phospho); K25(Dimethyl)	78	HCD	28	1	2923.27	3	975.094	14.63	101.66	8703
ATTDLGRpSLGPVELLLR	1	T(2): 0.0; T(3): 0.0; S(8): 100.0	375	Q16512	Serine/threonine-protein kinase N1 OS=Homo sapiens GN=PKN1 PE=1 SV=1 - [PKN1_HUMAN]	1	Q16512	S69	Serine/threonine-protein kinase N1 (EC 2.7.11.13) (Protease-activated kinase 1) (PAK-1) (Protein kinase C-like 1) (Protein kinase C-like PKN) (Protein kinase PKN-alpha) (Protein-kinase C-related kinase 1) (Serine-threonine protein kinase N)	PKN1 PAK1 PKN PRK1 PRKCL1																									Reverse	Class I	aTTDLGRsLGPVELLLR	1	N-Term(Dimethyl); S8(Phospho)	70	ETD	27	1	1919.04	3	640.351	1.93	147.87	10137
WGPGSpSVGSLQALSSSQR	1	S(5): 0.0; S(6): 100.0; S(9): 0.0; S(14): 0.0; S(15): 0.0; S(16): 0.0	375	P48681	Nestin OS=Homo sapiens GN=NES PE=1 SV=2 - [NEST_HUMAN]	1	P48681	S1442	Nestin	NES Nbla00170																									Reverse	Class I	wGPGSsVGSLQALSSSQR	1	N-Term(Dimethyl); S6(Phospho)	95	ETD	14	0	1911.9	3	637.971	1.14	137.22	10368
pSLTNLSFLTDSEK	1	S(1): 100.0; T(3): 0.0; S(6): 0.0; T(9): 0.0; S(11): 0.0	375	Q8NEY1	Neuron navigator 1 OS=Homo sapiens GN=NAV1 PE=1 SV=2 - [NAV1_HUMAN]	1	Q8NEY1	S90	Neuron navigator 1 (Pore membrane and/or filament-interacting-like protein 3) (Steerin-1) (Unc-53 homolog 1) (unc53H1)	NAV1 KIAA1151 KIAA1213 POMFIL3 STEERIN1																									Reverse	Class I	sLTNLSFLTDSEk	1	N-Term(Dimethyl); S1(Phospho); K13(Dimethyl)	92	ETD	13	0	1590.77	3	530.927	0.79	145.34	10647
RGHTApSESDEQQWPEEK	1	T(4): 0.0; S(6): 100.0; S(8): 0.0	375	Q9NTI5	Sister chromatid cohesion protein PDS5 homolog B OS=Homo sapiens GN=PDS5B PE=1 SV=1 - [PDS5B_HUMAN]	1	Q9NTI5	S1257	Sister chromatid cohesion protein PDS5 homolog B (Androgen-induced proliferation inhibitor) (Androgen-induced prostate proliferative shutoff-associated protein AS3)	PDS5B APRIN AS3 KIAA0979																									Reverse	Class I	rGHTAsESDEQQWPEEk	1	N-Term(Dimethyl); S6(Phospho); K17(Dimethyl)	72	ETD	34	1	2149.92	3	717.311	-0.15	57.66	3839
AMLDQLMGTpSRDGDTTR	1	T(9): 0.1; S(10): 99.9; T(15): 0.0; T(16): 0.0	375	Q9Y383	Putative RNA-binding protein Luc7-like 2 OS=Homo sapiens GN=LUC7L2 PE=1 SV=2 - [LC7L2_HUMAN]	1	Q9Y383	S18	Putative RNA-binding protein Luc7-like 2	LUC7L2 CGI-59 CGI-74																									Reverse	Class I	amLDQLmGTsRDGDTTR	1	N-Term(Dimethyl); M2(Oxidation); M7(Oxidation); S10(Phospho)	63	ETD	27	1	2007.85	3	669.955	0.09	66.78	4568
SRpSTVALTAAGEAEDGTGR	1	S(1): 0.0; S(3): 100.0; T(4): 0.0; T(8): 0.0; T(17): 0.0	375	Q13796	Protein Shroom2 OS=Homo sapiens GN=SHROOM2 PE=1 SV=1 - [SHRM2_HUMAN]	1	Q13796	S646	Protein Shroom2 (Apical-like protein) (Protein APXL)	SHROOM2 APXL																									Reverse	Class I	sRsTVALTAAGEAEDGTGR	1	N-Term(Dimethyl); S3(Phospho)	113	ETD	28	1	1956.9	3	652.972	-0.29	78.43	5468
pTPSDDEEDNLFAPPK	1	T(1): 99.7; S(3): 0.3	375	Q641Q2;Q9Y4E1	Protein FAM21A OS=Homo sapiens GN=FAM21A PE=1 SV=3 - [FA21A_HUMAN]|Protein FAM21C OS=Homo sapiens GN=FAM21C PE=1 SV=2 - [FA21C_HUMAN]	2	Q641Q2	T331	WASH complex subunit FAM21A	FAM21A	Q9Y4E1	T331	WASH complex subunit FAM21C (Vaccinia virus penetration factor) (VPEF)	FAM21C KIAA0592																					Reverse	Class I	tPSDDEEDNLFAPPk	1	N-Term(Dimethyl:2H(4)); T1(Phospho); K15(Dimethyl:2H(4))	60	HCD	12	0	1818.83	2	909.918	-0.35	82.73	6341
GGGGGQDNGLEGLGNDpSR	1	S(17): 100.0	375	P08621	U1 small nuclear ribonucleoprotein 70 kDa OS=Homo sapiens GN=SNRP70 PE=1 SV=2 - [RU17_HUMAN]	1	P08621	S410	U1 small nuclear ribonucleoprotein 70 kDa (U1 snRNP 70 kDa) (U1-70K) (snRNP70)	SNRNP70 RNPU1Z RPU1 SNRP70 U1AP1																									Reverse	Class I	gGGGGQDNGLEGLGNDsR	1	N-Term(Dimethyl); S17(Phospho)	105	HCD	14	0	1767.73	2	884.37	1.29	83.06	6789
GLHSELGEpSSLILK	1	S(4): 0.0; S(9): 100.0; S(10): 0.0	375	P37023	Serine/threonine-protein kinase receptor R3 OS=Homo sapiens GN=ACVRL1 PE=1 SV=2 - [ACVL1_HUMAN]	1	P37023	S160	Serine/threonine-protein kinase receptor R3 (SKR3) (EC 2.7.11.30) (Activin receptor-like kinase 1) (ALK-1) (TGF-B superfamily receptor type I) (TSR-I)	ACVRL1 ACVRLK1 ALK1																									Reverse	Class I	gLHSELGEsSLILk	1	N-Term(Dimethyl); S9(Phospho); K14(Dimethyl)	90	ETD	28	0	1618.84	3	540.285	-2.21	130.31	8476
KLDDQpSEDEALELEGPLITPGSGSIYSSPGLYSK	1	S(6): 100.0; T(19): 0.0; S(22): 0.0; S(24): 0.0; Y(26): 0.0; S(27): 0.0; S(28): 0.0; Y(32): 0.0; S(33): 0.0	375	Q96AC1	Fermitin family homolog 2 OS=Homo sapiens GN=FERMT2 PE=1 SV=1 - [FERM2_HUMAN]	1	Q96AC1	S159	Fermitin family homolog 2 (Kindlin-2) (Mitogen-inducible gene 2 protein) (MIG-2) (Pleckstrin homology domain-containing family C member 1) (PH domain-containing family C member 1)	FERMT2 KIND2 MIG2 PLEKHC1																									Reverse	Class I	kLDDQsEDEALELEGPLITPGSGSIYSSPGLYSk	1	N-Term(Dimethyl); K1(Dimethyl); S6(Phospho); K34(Dimethyl)	60	HCD	27	1	3759.82	3	1253.94	1.24	144.11	9882
RSpSSSSTTPTSANSLYR	1	S(2): 0.0; S(3): 100.0; S(4): 0.0; S(5): 0.0; S(6): 0.0; T(7): 0.0; T(8): 0.0; T(10): 0.0; S(11): 0.0; S(14): 0.0; Y(16): 0.0	374	Q0VF96	Cingulin-like protein 1 OS=Homo sapiens GN=CGNL1 PE=1 SV=1 - [CGNL1_HUMAN]	1	Q0VF96	S297	Cingulin-like protein 1 (Junction-associated coiled-coil protein) (Paracingulin)	CGNL1 JACOP KIAA1749																									Reverse	Class I	rSsSSSTTPTSANSLYR	1	N-Term(Dimethyl); S3(Phospho)	119	ETD	29	1	1909.87	3	637.294	0.72	55.75	3559
RLpSTSPDVIQGHQPR	1	S(3): 100.0; T(4): 0.0; S(5): 0.0	374	Q9Y385	Ubiquitin-conjugating enzyme E2 J1 OS=Homo sapiens GN=UBE2J1 PE=1 SV=2 - [UB2J1_HUMAN]	1	Q9Y385	S266	Ubiquitin-conjugating enzyme E2 J1 (EC 6.3.2.19) (Non-canonical ubiquitin-conjugating enzyme 1) (NCUBE-1) (Yeast ubiquitin-conjugating enzyme UBC6 homolog E) (HsUBC6e)	UBE2J1 NCUBE1 CGI-76 HSPC153 HSPC205																									Reverse	Class I	rLsTSPDVIQGHQPR	1	N-Term(Dimethyl:2H(4)); S3(Phospho)	83	ETD	32	1	1802.92	3	601.645	-0.86	66.78	4032
pSAGEEEDGPVLTDEQK	1	S(1): 100.0; T(12): 0.0	374	Q66PJ3	ADP-ribosylation factor-like protein 6-interacting protein 4 OS=Homo sapiens GN=ARL6IP4 PE=1 SV=1 - [AR6P4_HUMAN]	1	Q66PJ3	S271	ADP-ribosylation factor-like protein 6-interacting protein 4 (ARL-6-interacting protein 4) (Aip-4) (HSP-975) (HSVI-binding protein) (SR-15) (SRp25) (SR-25)	ARL6IP4																									Reverse	Class I	sAGEEEDGPVLTDEQk	1	N-Term(Dimethyl:2H(4)); S1(Phospho); K16(Dimethyl:2H(4))	98	ETD	12	0	1847.84	3	616.618	-0.36	54.99	4080
VAYEGpSDSEKGEGAEPLK	1	Y(3): 0.0; S(6): 100.0; S(8): 0.0	374	P78549	Endonuclease III-like protein 1 OS=Homo sapiens GN=NTHL1 PE=1 SV=2 - [NTHL1_HUMAN]	1	P78549	S71	Endonuclease III-like protein 1 (EC 4.2.99.18)	NTHL1 NTH1 OCTS3																									Reverse	Class I	vAYEGsDSEkGEGAEPLk	1	N-Term(Dimethyl); S6(Phospho); K10(Dimethyl); K18(Dimethyl)	94	ETD	27	1	2029.94	3	677.317	-0.8	63.28	4272
ApSLGpSLEGEAEAEASSPK	2	S(2): 100.0; S(5): 100.0; S(15): 0.0; S(16): 0.0	374	Q09666	Neuroblast differentiation-associated protein AHNAK OS=Homo sapiens GN=AHNAK PE=1 SV=2 - [AHNK_HUMAN]	1	Q09666	S5749, S5752	Neuroblast differentiation-associated protein AHNAK (Desmoyokin)	AHNAK PM227																									Reverse	Class I	asLGsLEGEAEAEASSPk	1	N-Term(Dimethyl); S2(Phospho); S5(Phospho); K18(Dimethyl)	87	ETD	6	0	1948.82	3	650.278	-0.08	88.59	6391
FSELEHLDRLpSGR	1	S(2): 0.0; S(11): 100.0	374	P37173	TGF-beta receptor type-2 OS=Homo sapiens GN=TGFBR2 PE=1 SV=2 - [TGFR2_HUMAN]	1	P37173	S548	TGF-beta receptor type-2 (TGFR-2) (EC 2.7.11.30) (TGF-beta type II receptor) (Transforming growth factor-beta receptor type II) (TGF-beta receptor type II) (TbetaR-II)	TGFBR2																									Reverse	Class I	fSELEHLDRLsGR	1	N-Term(Dimethyl); S11(Phospho)	72	ETD	33	1	1666.79	3	556.269	-1.3	109.98	6514
QPDISCILGTGGKpSPR	1	S(5): 0.0; T(10): 0.0; S(14): 100.0	374	P57740	Nuclear pore complex protein Nup107 OS=Homo sapiens GN=NUP107 PE=1 SV=1 - [NU107_HUMAN]	1	P57740	S86	Nuclear pore complex protein Nup107 (107 kDa nucleoporin) (Nucleoporin Nup107)	NUP107																									Reverse	Class I	qPDIScILGTGGksPR	1	N-Term(Dimethyl); C6(Carbamidomethyl); K13(Dimethyl); S14(Phospho)	80	ETD	28	1	1821.87	3	607.963	-10.33	122.78	7957
NDARpSPGSISYLPSFFTK	1	S(5): 100.0; S(8): 0.0; S(10): 0.0; Y(11): 0.0; S(14): 0.0; T(17): 0.0	374	O75376	Nuclear receptor corepressor 1 OS=Homo sapiens GN=NCOR1 PE=1 SV=2 - [NCOR1_HUMAN]	1	O75376	S2184	Nuclear receptor corepressor 1 (N-CoR) (N-CoR1)	NCOR1 KIAA1047																									Reverse	Class I	nDARsPGSISYLPSFFTk	1	N-Term(Dimethyl:2H(4)); S5(Phospho); K18(Dimethyl:2H(4))	82	ETD	28	1	2131.07	3	711.029	0.49	144	9151
KTSFDQDpSDVDIFPSDFPTEPPSLPR	1	T(2): 0.0; S(3): 0.0; S(8): 100.0; S(15): 0.0; T(19): 0.0; S(23): 0.0	374	Q02880	DNA topoisomerase 2-beta OS=Homo sapiens GN=TOP2B PE=1 SV=3 - [TOP2B_HUMAN]	1	Q02880	S1581	DNA topoisomerase 2-beta (EC 5.99.1.3) (DNA topoisomerase II, beta isozyme)	TOP2B																									Reverse	Class I	kTSFDQDsDVDIFPSDFPTEPPSLPR	1	N-Term(Dimethyl); K1(Dimethyl); S8(Phospho)	45	HCD	28	1	3073.41	3	1025.14	0.63	144.96	9389
TGpSYGALAEITASK	1	T(1): 0.0; S(3): 100.0; Y(4): 0.0; T(11): 0.0; S(13): 0.0	373	O14974	Protein phosphatase 1 regulatory subunit 12A OS=Homo sapiens GN=PPP1R12A PE=1 SV=1 - [MYPT1_HUMAN]	1	O14974	S445	Protein phosphatase 1 regulatory subunit 12A (Myosin phosphatase-targeting subunit 1) (Myosin phosphatase target subunit 1) (Protein phosphatase myosin-binding subunit)	PPP1R12A MBS MYPT1																									Reverse	Class I	tGsYGALAEITASk	1	N-Term(Dimethyl); S3(Phospho); K14(Dimethyl)	87	ETD	14	0	1504.73	3	502.249	1.56	134.95	10163
SSpSQENLLDEVMK	1	S(1): 0.0; S(2): 0.0; S(3): 100.0	373	Q3V6T2	Girdin OS=Homo sapiens GN=CCDC88A PE=1 SV=2 - [GRDN_HUMAN]	1	Q3V6T2	S1702	Girdin (Akt phosphorylation enhancer) (APE) (Coiled-coil domain-containing protein 88A) (G alpha-interacting vesicle-associated protein) (GIV) (Girders of actin filament) (Hook-related protein 1) (HkRP1)	CCDC88A APE GRDN KIAA1212																									Reverse	Class I	sSsQENLLDEVMk	1	N-Term(Dimethyl:2H(4)); S3(Phospho); K13(Dimethyl:2H(4))	87	ETD	13	0	1623.78	3	541.931	0.54	145.17	10635
VLSTpSTDLEAAVADALK	1	S(3): 0.0; T(4): 0.0; S(5): 100.0; T(6): 0.0	373	Q7Z460	CLIP-associating protein 1 OS=Homo sapiens GN=CLASP1 PE=1 SV=1 - [CLAP1_HUMAN]	1	Q7Z460	S797	CLIP-associating protein 1 (Cytoplasmic linker-associated protein 1) (Multiple asters homolog 1) (Protein Orbit homolog 1) (hOrbit1)	CLASP1 KIAA0622 MAST1																									Reverse	Class I	vLSTsTDLEAAVADALk	1	N-Term(Dimethyl); S5(Phospho); K17(Dimethyl)	81	ETD	13	0	1839.94	3	613.983	0.24	152.8	11167
HADNSpSDTEMEDMIAEETLEEMDSELLK	1	S(5): 0.8; S(6): 98.3; T(8): 0.8; T(18): 0.0; S(24): 0.0	373	Q8NDX5	Polyhomeotic-like protein 3 OS=Homo sapiens GN=PHC3 PE=1 SV=1 - [PHC3_HUMAN]	1	Q8NDX5	S762	Polyhomeotic-like protein 3 (Early development regulatory protein 3) (Homolog of polyhomeotic 3) (hPH3)	PHC3 EDR3 PH3																									Reverse	Class I	hADNSsDTEmEDmIAEETLEEmDSELLk	2	N-Term(Dimethyl); S6(Phospho); M10(Oxidation); M13(Oxidation); M22(Oxidation); K28(Dimethyl)	68	HCD	27	0	3396.41	3	1132.81	14.01	146.7	12320
EAARpSPDKPGGpSPSASR	2	S(5): 100.0; S(12): 100.0; S(14): 0.0; S(16): 0.0	373	Q9Y3T9	Nucleolar complex protein 2 homolog OS=Homo sapiens GN=NOC2L PE=1 SV=3 - [NOC2L_HUMAN]	1	Q9Y3T9	S49, S56	Nucleolar complex protein 2 homolog (Protein NOC2 homolog) (NOC2-like protein) (Novel INHAT repressor)	NOC2L NIR																									Reverse	Class I	eAARsPDkPGGsPSASR	1	N-Term(Dimethyl); S5(Phospho); K8(Dimethyl); S12(Phospho)	70	ETD	29	1	1885.82	3	629.279	0.97	25.12	1815
ADMTASGpSPDYGQPHK	1	T(4): 0.0; S(6): 0.0; S(8): 100.0; Y(11): 0.0	373	Q01543	Friend leukemia integration 1 transcription factor OS=Homo sapiens GN=FLI1 PE=1 SV=1 - [FLI1_HUMAN]	1	Q01543	S39	Friend leukemia integration 1 transcription factor (Proto-oncogene Fli-1) (Transcription factor ERGB)	FLI1																									Reverse	Class I	aDmTASGsPDYGQPHk	1	N-Term(Dimethyl:2H(4)); M3(Oxidation); S8(Phospho); K16(Dimethyl:2H(4))	86	HCD	27	0	1821.79	2	911.401	-1.4	36	2514
RPpSESDKEDELDK	1	S(3): 100.0; S(5): 0.0	373	Q02952	A-kinase anchor protein 12 OS=Homo sapiens GN=AKAP12 PE=1 SV=3 - [AKA12_HUMAN]	1	Q02952	S627	A-kinase anchor protein 12 (AKAP-12) (A-kinase anchor protein 250 kDa) (AKAP 250) (Gravin) (Myasthenia gravis autoantigen)	AKAP12 AKAP250																									Reverse	Class I	rPsESDkEDELDk	1	N-Term(Dimethyl:2H(4)); S3(Phospho); K7(Dimethyl:2H(4)); K13(Dimethyl:2H(4))	83	ETD	32	1	1723.85	3	575.289	-1.22	39.86	2672
SSGHSSSELpSPDAVEK	1	S(1): 0.0; S(2): 0.0; S(5): 0.0; S(6): 0.0; S(7): 0.0; S(10): 100.0	373	Q9UQ35	Serine/arginine repetitive matrix protein 2 OS=Homo sapiens GN=SRRM2 PE=1 SV=2 - [SRRM2_HUMAN]	1	Q9UQ35	S1387	Serine/arginine repetitive matrix protein 2 (300 kDa nuclear matrix antigen) (Serine/arginine-rich splicing factor-related nuclear matrix protein of 300 kDa) (SR-related nuclear matrix protein of 300 kDa) (Ser/Arg-related nuclear matrix protein of 300 kDa) (Splicing coactivator subunit SRm300) (Tax-responsive enhancer element-binding protein 803) (TaxREB803)	SRRM2 KIAA0324 SRL300 SRM300 HSPC075																									Reverse	Class I	sSGHSSSELsPDAVEk	1	N-Term(Dimethyl); S10(Phospho); K16(Dimethyl)	62	ETD	29	0	1752.77	3	584.927	-1.15	54.83	3923
RPIIAGMEFSRpSK	1	S(10): 0.0; S(12): 100.0	373	P21453	Sphingosine 1-phosphate receptor 1 OS=Homo sapiens GN=S1PR1 PE=1 SV=2 - [S1PR1_HUMAN]	1	P21453	S353	Sphingosine 1-phosphate receptor 1 (S1P receptor 1) (S1P1) (Endothelial differentiation G-protein coupled receptor 1) (Sphingosine 1-phosphate receptor Edg-1) (S1P receptor Edg-1) (CD antigen CD363)	S1PR1 CHEDG1 EDG1																									Reverse	Class I	rPIIAGmEFSRsk	1	N-Term(Dimethyl); M7(Oxidation); S12(Phospho); K13(Dimethyl)	76	ETD	33	1	1643.83	3	548.615	-2.28	75.99	4714
DFAARpSPSApSITDEDSNV	2	S(6): 100.0; S(8): 0.1; S(10): 99.9; T(12): 0.0; S(16): 0.0	373	Q86W92	Liprin-beta-1 OS=Homo sapiens GN=PPFIBP1 PE=1 SV=2 - [LIPB1_HUMAN]	1	Q86W92	S999, S1003	Liprin-beta-1 (Protein tyrosine phosphatase receptor type f polypeptide-interacting protein-binding protein 1) (PTPRF-interacting protein-binding protein 1) (hSGT2)	PPFIBP1 KIAA1230																									Reverse	Class I	dFAARsPSAsITDEDSNV	1	N-Term(Dimethyl); S6(Phospho); S10(Phospho)	58	ETD	7	1	2069.81	3	690.609	1.74	68.79	4780
QRDKpSPSSLLEDAK	1	S(5): 100.0; S(7): 0.0; S(8): 0.0	373	P42684	Tyrosine-protein kinase ABL2 OS=Homo sapiens GN=ABL2 PE=1 SV=1 - [ABL2_HUMAN]	1	P42684	S631	Abelson tyrosine-protein kinase 2 (EC 2.7.10.2) (Abelson murine leukemia viral oncogene homolog 2) (Abelson-related gene protein) (Tyrosine-protein kinase ARG)	ABL2 ABLL ARG																									Reverse	Class I	qRDksPSSLLEDAk	1	N-Term(Dimethyl); K4(Dimethyl); S5(Phospho); K14(Dimethyl)	66	ETD	33	2	1737.88	3	579.964	0.31	83.52	5161
TTRpTPEEGGYSYDISEK	1	T(1): 0.0; T(2): 0.0; T(4): 100.0; Y(10): 0.0; S(11): 0.0; Y(12): 0.0; S(15): 0.0	373	P46821	Microtubule-associated protein 1B OS=Homo sapiens GN=MAP1B PE=1 SV=1 - [MAP1B_HUMAN]	1	P46821	T1949	Microtubule-associated protein 1B (MAP-1B) [Cleaved into: MAP1 light chain LC1]	MAP1B																									Reverse	Class I	tTRtPEEGGYSYDISEk	1	N-Term(Dimethyl); T4(Phospho); K17(Dimethyl)	88	ETD	28	1	2068.91	3	690.307	-1.64	81.86	5641
ADLNQGIGEPQpSPSR	1	S(12): 100.0; S(14): 0.0	373	Q96C19	EF-hand domain-containing protein D2 OS=Homo sapiens GN=EFHD2 PE=1 SV=1 - [EFHD2_HUMAN]	1	Q96C19	S74	EF-hand domain-containing protein D2 (Swiprosin-1)	EFHD2 SWS1																									Reverse	Class I	aDLNQGIGEPQsPSR	1	N-Term(Dimethyl:2H(4)); S12(Phospho)	73	HCD	14	0	1680.79	2	840.898	0.13	78.12	6369
ASQpSRPNpSSALETLGGEK	2	S(2): 0.0; S(4): 100.0; S(8): 99.9; S(9): 0.1; T(13): 0.0	373	O94804	Serine/threonine-protein kinase 10 OS=Homo sapiens GN=STK10 PE=1 SV=1 - [STK10_HUMAN]	1	O94804	S450, S454	Serine/threonine-protein kinase 10 (EC 2.7.11.1) (Lymphocyte-oriented kinase)	STK10 LOK																									Reverse	Class I	aSQsRPNsSALETLGGEk	1	N-Term(Dimethyl:2H(4)); S4(Phospho); S8(Phospho); K18(Dimethyl:2H(4))	98	ETD	14	0	2055.96	3	685.992	0.53	97.45	7457
KEpTEpSEAEDNLDDLEK	2	T(3): 100.0; S(5): 100.0	373	Q8IYB3	Serine/arginine repetitive matrix protein 1 OS=Homo sapiens GN=SRRM1 PE=1 SV=2 - [SRRM1_HUMAN]	1	Q8IYB3	T872, S874	Serine/arginine repetitive matrix protein 1 (SR-related nuclear matrix protein of 160 kDa) (SRm160) (Ser/Arg-related nuclear matrix protein)	SRRM1 SRM160																									Reverse	Class I	kEtEsEAEDNLDDLEk	1	N-Term(Dimethyl:2H(4)); K1(Dimethyl:2H(4)); T3(Phospho); S5(Phospho); K16(Dimethyl:2H(4))	68	ETD	14	1	2120.93	3	707.65	1.25	110.06	8382
pSLDMTDNSNNQLVVR	1	S(1): 100.0; T(5): 0.0; S(8): 0.0	373	Q14155	Rho guanine nucleotide exchange factor 7 OS=Homo sapiens GN=ARHGEF7 PE=1 SV=2 - [ARHG7_HUMAN]	1	Q14155	S176	Rho guanine nucleotide exchange factor 7 (Beta-Pix) (COOL-1) (PAK-interacting exchange factor beta) (p85)	ARHGEF7 COOL1 KIAA0142 P85SPR PAK3BP PIXB Nbla10314																									Reverse	Class I	sLDMTDNSNNQLVVR	1	N-Term(Dimethyl); S1(Phospho)	97	ETD	13	0	1813.82	3	605.278	2.03	118.99	8717
SApSQSpSLDKLDQELK	2	S(1): 0.0; S(3): 100.0; S(5): 0.0; S(6): 100.0	373	O60271	C-jun-amino-terminal kinase-interacting protein 4 OS=Homo sapiens GN=SPAG9 PE=1 SV=4 - [JIP4_HUMAN]	1	O60271	S730, S733	C-Jun-amino-terminal kinase-interacting protein 4 (JIP-4) (JNK-interacting protein 4) (Cancer/testis antigen 89) (CT89) (Human lung cancer oncogene 6 protein) (HLC-6) (JNK-associated leucine-zipper protein) (JLP) (Mitogen-activated protein kinase 8-interacting protein 4) (Proliferation-inducing protein 6) (Protein highly expressed in testis) (PHET) (Sperm surface protein) (Sperm-associated antige…	SPAG9 HSS KIAA0516 MAPK8IP4 SYD1 HLC6																									Reverse	Class I	sAsQSsLDkLDQELk	1	N-Term(Dimethyl:2H(4)); S3(Phospho); S6(Phospho); K9(Dimethyl:2H(4)); K15(Dimethyl:2H(4))	100	ETD	14	1	1904.94	3	635.651	-0.55	124.79	9411
SpSPATSLFVELDEEEVK	1	S(1): 0.1; S(2): 99.9; T(5): 0.0; S(6): 0.0	372	Q9BXK5	Bcl-2-like 13 protein OS=Homo sapiens GN=BCL2L13 PE=1 SV=1 - [B2L13_HUMAN]	1	Q9BXK5	S371	Bcl-2-like protein 13 (Bcl2-L-13) (Bcl-rambo) (Protein Mil1)	BCL2L13 MIL1 CD003																									Reverse	Class I	ssPATSLFVELDEEEVk	1	N-Term(Dimethyl:2H(4)); S2(Phospho); K17(Dimethyl:2H(4))	79	ETD	13	0	2024	3	675.337	-0.63	148.53	10868
IQQFDDGGpSDEEDIWEEK	1	S(9): 100.0	372	Q5H9R7	SAPS domain family member 3 OS=Homo sapiens GN=SAPS3 PE=1 SV=2 - [SAPS3_HUMAN]	1	Q5H9R7	S617	Serine/threonine-protein phosphatase 6 regulatory subunit 3 (SAPS domain family member 3) (Sporulation-induced transcript 4-associated protein SAPL)	PPP6R3 C11orf23 KIAA1558 PP6R3 SAPL SAPS3																									Reverse	Class I	iQQFDDGGsDEEDIWEEk	1	N-Term(Dimethyl:2H(4)); S9(Phospho); K18(Dimethyl:2H(4))	67	HCD	14	0	2283.98	3	761.998	0.38	140.79	11878
KGNEAVApSRDLSENNDQR	1	S(8): 100.0; S(12): 0.0	372	Q8NBJ4	Golgi membrane protein 1 OS=Homo sapiens GN=GOLM1 PE=1 SV=1 - [GOLM1_HUMAN]	1	Q8NBJ4	S187	Golgi membrane protein 1 (Golgi membrane protein GP73) (Golgi phosphoprotein 2)	GOLM1 C9orf155 GOLPH2 PSEC0242 UNQ686/PRO1326																									Reverse	Class I	kGNEAVAsRDLSENNDQR	1	N-Term(Dimethyl); K1(Dimethyl); S8(Phospho)	96	ETD	33	2	2138.98	3	713.665	-0.83	38.2	2652
DDKEEEEDGTGpSPQLNNR	1	T(10): 0.0; S(12): 100.0	372	P49407	Beta-arrestin-1 OS=Homo sapiens GN=ARRB1 PE=1 SV=2 - [ARRB1_HUMAN]	1	P49407	S412	Beta-arrestin-1 (Arrestin beta-1)	ARRB1 ARR1																									Reverse	Class I	dDkEEEEDGTGsPQLNNR	1	N-Term(Dimethyl:2H(4)); K3(Dimethyl:2H(4)); S12(Phospho)	82	ETD	27	1	2176.95	3	726.322	0.91	40.08	2740
TGRDpTPENGETAIGAENSEK	1	T(1): 0.0; T(5): 100.0; T(11): 0.0; S(18): 0.0	372	Q8N3X1	Formin-binding protein 4 OS=Homo sapiens GN=FNBP4 PE=1 SV=2 - [FNBP4_HUMAN]	1	Q8N3X1	T479	Formin-binding protein 4 (Formin-binding protein 30)	FNBP4 FBP30 KIAA1014																									Reverse	Class I	tGRDtPENGETAIGAENSEk	1	N-Term(Dimethyl:2H(4)); T5(Phospho); K20(Dimethyl:2H(4))	91	ETD	28	1	2220.03	3	740.68	-0.64	47.92	3447
TKpSRIEQGIVDR	1	T(1): 0.0; S(3): 100.0	372	Q8IWT6	Leucine-rich repeat-containing protein 8A OS=Homo sapiens GN=LRRC8A PE=1 SV=1 - [LRC8A_HUMAN]	1	Q8IWT6	S217	Leucine-rich repeat-containing protein 8A	LRRC8A KIAA1437 LRRC8 UNQ221/PRO247																									Reverse	Class I	tksRIEQGIVDR	1	N-Term(Dimethyl); K2(Dimethyl); S3(Phospho)	73	ETD	33	2	1537.81	3	513.275	0.2	54.99	3589
QSNASpSDVEVEEKETSVSK	1	S(2): 0.0; S(5): 0.0; S(6): 100.0; T(15): 0.0; S(16): 0.0; S(18): 0.0	372	O75475	PC4 and SFRS1-interacting protein OS=Homo sapiens GN=PSIP1 PE=1 SV=1 - [PSIP1_HUMAN]	1	O75475	S106	PC4 and SFRS1-interacting protein (CLL-associated antigen KW-7) (Dense fine speckles 70 kDa protein) (DFS 70) (Lens epithelium-derived growth factor) (Transcriptional coactivator p75/p52)	PSIP1 DFS70 LEDGF PSIP2																									Reverse	Class I	qSNASsDVEVEEkETSVSk	1	N-Term(Dimethyl); S6(Phospho); K13(Dimethyl); K19(Dimethyl)	106	ETD	27	1	2217.02	3	739.678	0.87	63.23	4269
GRLDSSEMDHpSENEDYTMSSPLPGK	1	S(5): 0.0; S(6): 0.0; S(11): 100.0; Y(16): 0.0; T(17): 0.0; S(19): 0.0; S(20): 0.0	372	Q9NTI5	Sister chromatid cohesion protein PDS5 homolog B OS=Homo sapiens GN=PDS5B PE=1 SV=1 - [PDS5B_HUMAN]	1	Q9NTI5	S1182	Sister chromatid cohesion protein PDS5 homolog B (Androgen-induced proliferation inhibitor) (Androgen-induced prostate proliferative shutoff-associated protein AS3)	PDS5B APRIN AS3 KIAA0979																									Reverse	Class I	gRLDSSEmDHsENEDYTmSSPLPGk	1	N-Term(Dimethyl:2H(4)); M8(Oxidation); S11(Phospho); M18(Oxidation); K25(Dimethyl:2H(4))	81	HCD	31	1	2958.26	3	986.758	-1.42	73.44	4482
SApSSSWLEGTSTQAK	1	S(1): 0.0; S(3): 100.0; S(4): 0.0; S(5): 0.0; T(10): 0.0; S(11): 0.0; T(12): 0.0	372	Q9BZL4	Protein phosphatase 1 regulatory subunit 12C OS=Homo sapiens GN=PPP1R12C PE=1 SV=1 - [PP12C_HUMAN]	1	Q9BZL4	S452	Protein phosphatase 1 regulatory subunit 12C (Protein phosphatase 1 myosin-binding subunit of 85 kDa) (Protein phosphatase 1 myosin-binding subunit p85)	PPP1R12C LENG3 MBS85																									Reverse	Class I	sAsSSWLEGTSTQAk	1	N-Term(Dimethyl); S3(Phospho); K15(Dimethyl)	91	ETD	13	0	1675.76	3	559.257	-0.29	106.39	7853
NQSLGQpSAPSLTAGLK	1	S(3): 0.0; S(7): 100.0; S(10): 0.0; T(12): 0.0	372	Q6P0Q8	Microtubule-associated serine/threonine-protein kinase 2 OS=Homo sapiens GN=MAST2 PE=1 SV=2 - [MAST2_HUMAN]	1	Q6P0Q8	S148	Microtubule-associated serine/threonine-protein kinase 2 (EC 2.7.11.1)	MAST2 KIAA0807 MAST205																									Reverse	Class I	nQSLGQsAPSLTAGLk	1	N-Term(Dimethyl:2H(4)); S7(Phospho); K16(Dimethyl:2H(4))	76	ETD	14	0	1715.92	3	572.644	-0.34	116.79	8856
VLNTGpSDVEEAVADALK	1	T(4): 0.0; S(6): 100.0	371	O75122	CLIP-associating protein 2 OS=Homo sapiens GN=CLASP2 PE=1 SV=2 - [CLAP2_HUMAN]	1	O75122	S596	CLIP-associating protein 2 (Cytoplasmic linker-associated protein 2) (Protein Orbit homolog 2) (hOrbit2)	CLASP2 KIAA0627																									Reverse	Class I	vLNTGsDVEEAVADALk	1	N-Term(Dimethyl:2H(4)); S6(Phospho); K17(Dimethyl:2H(4))	97	ETD	14	0	1874.96	3	625.659	1.92	150.61	11453
NQGGYGGSSSSpSSYGSGR	1	Y(5): 0.0; S(8): 0.0; S(9): 0.0; S(10): 0.0; S(11): 0.0; S(12): 100.0; S(13): 0.0; Y(14): 0.0; S(16): 0.0	371	P09651	Heterogeneous nuclear ribonucleoprotein A1 OS=Homo sapiens GN=HNRNPA1 PE=1 SV=4 - [ROA1_HUMAN]	1	P09651	S364	Heterogeneous nuclear ribonucleoprotein A1 (hnRNP A1) (Helix-destabilizing protein) (Single-strand RNA-binding protein) (hnRNP core protein A1)	HNRNPA1 HNRPA1																									Reverse	Class I	nQGGYGGSSSSsSYGSGR	1	N-Term(Dimethyl); S12(Phospho)	94	ETD	14	0	1802.7	3	601.571	0.45	40.4	2875
NFYEpSDDDQKEK	1	Y(3): 0.0; S(5): 100.0	371	O00203	AP-3 complex subunit beta-1 OS=Homo sapiens GN=AP3B1 PE=1 SV=2 - [AP3B1_HUMAN]	1	O00203	S276	AP-3 complex subunit beta-1 (Adapter-related protein complex 3 subunit beta-1) (Adaptor protein complex AP-3 subunit beta-1) (Beta-3A-adaptin) (Clathrin assembly protein complex 3 beta-1 large chain)	AP3B1 ADTB3A																									Reverse	Class I	nFYEsDDDQkEk	1	N-Term(Dimethyl); S5(Phospho); K10(Dimethyl); K12(Dimethyl)	68	ETD	28	1	1681.7	3	561.237	-0.85	54.63	3897
GGVTGSPEASISGpSKGDLK	1	T(4): 0.0; S(6): 0.0; S(10): 0.0; S(12): 0.0; S(14): 100.0	371	Q09666	Neuroblast differentiation-associated protein AHNAK OS=Homo sapiens GN=AHNAK PE=1 SV=2 - [AHNK_HUMAN]	1	Q09666	S5739	Neuroblast differentiation-associated protein AHNAK (Desmoyokin)	AHNAK PM227																									Reverse	Class I	gGVTGSPEASISGskGDLk	1	N-Term(Dimethyl:2H(4)); S14(Phospho); K15(Dimethyl:2H(4)); K19(Dimethyl:2H(4))	87	ETD	27	1	1923.02	3	641.679	0.58	73	4987
SSKApSLGSLEGEAEAEASSPK	1	S(1): 0.0; S(2): 0.0; S(5): 100.0; S(8): 0.0; S(18): 0.0; S(19): 0.0	371	Q09666	Neuroblast differentiation-associated protein AHNAK OS=Homo sapiens GN=AHNAK PE=1 SV=2 - [AHNK_HUMAN]	1	Q09666	S5749	Neuroblast differentiation-associated protein AHNAK (Desmoyokin)	AHNAK PM227																									Reverse	Class I	sSkAsLGSLEGEAEAEASSPk	1	N-Term(Dimethyl); K3(Dimethyl); S5(Phospho); K21(Dimethyl)	103	ETD	27	1	2199.03	3	733.68	-7.54	120.06	7710
IVRGDQPAASGDpSDDDEPPPLPR	1	S(10): 0.0; S(13): 100.0	371	O00264	Membrane-associated progesterone receptor component 1 OS=Homo sapiens GN=PGRMC1 PE=1 SV=3 - [PGRC1_HUMAN]	1	O00264	S57	Membrane-associated progesterone receptor component 1 (mPR)	PGRMC1 HPR6.6 PGRMC																									Reverse	Class I	iVRGDQPAASGDsDDDEPPPLPR	1	N-Term(Dimethyl:2H(4)); S13(Phospho)	58	HCD	28	1	2516.16	3	839.391	-0.93	99.94	8302
AESSSGGGTVPSSAGILEQGPSPGDGpSPPKPK	1	S(3): 0.0; S(4): 0.0; S(5): 0.0; T(9): 0.0; S(12): 0.0; S(13): 0.0; S(22): 0.0; S(27): 100.0	371	Q68EM7	Rho GTPase-activating protein 17 OS=Homo sapiens GN=ARHGAP17 PE=1 SV=1 - [RHG17_HUMAN]	1	Q68EM7	S575	Rho GTPase-activating protein 17 (Rho-type GTPase-activating protein 17) (RhoGAP interacting with CIP4 homologs protein 1) (RICH-1)	ARHGAP17 RICH1 MSTP066 MSTP110																									Reverse	Class I	aESSSGGGTVPSSAGILEQGPSPGDGsPPkPk	1	N-Term(Dimethyl:2H(4)); S27(Phospho); K30(Dimethyl:2H(4)); K32(Dimethyl:2H(4))	66	HCD	27	0	3111.56	3	1037.86	-0.03	106.74	8963
LTLNpSPIFDKPLSR	1	T(2): 0.0; S(5): 100.0; S(13): 0.0	371	Q00536	Serine/threonine-protein kinase PCTAIRE-1 OS=Homo sapiens GN=PCTK1 PE=1 SV=1 - [PCTK1_HUMAN]	1	Q00536	S138	Cyclin-dependent kinase 16 (EC 2.7.11.22) (Cell division protein kinase 16) (PCTAIRE-motif protein kinase 1) (Serine/threonine-protein kinase PCTAIRE-1)	CDK16 PCTK1																									Reverse	Class I	lTLNsPIFDkPLSR	1	N-Term(Dimethyl); S5(Phospho); K10(Dimethyl)	64	ETD	28	0	1736.93	3	579.649	-1.54	140.07	9089
TEpSGEETDLISPPQEEVK	1	T(1): 0.2; S(3): 99.8; T(7): 0.0; S(11): 0.0	371	O43493	Trans-Golgi network integral membrane protein 2 OS=Homo sapiens GN=TGOLN2 PE=1 SV=2 - [TGON2_HUMAN]	1	O43493	S298	Trans-Golgi network integral membrane protein 2 (TGN38 homolog) (TGN46) (TGN48) (Trans-Golgi network protein TGN51)	TGOLN2 TGN46 TGN51																									Reverse	Class I	tESGEETDLISPPQEEVk	1	N-Term(Dimethyl); T1(Phospho); K18(Dimethyl)	89	HCD	13	0	2123.97	2	1062.49	1.69	117.75	9430
IILDLISEpSPIK	1	S(7): 0.0; S(9): 100.0	370	P61978	Heterogeneous nuclear ribonucleoprotein K OS=Homo sapiens GN=HNRNPK PE=1 SV=1 - [HNRPK_HUMAN]	1	P61978	S216	Heterogeneous nuclear ribonucleoprotein K (hnRNP K) (Transformation up-regulated nuclear protein) (TUNP)	HNRNPK HNRPK																									Reverse	Class I	iILDLISEsPIk	1	N-Term(Dimethyl); S9(Phospho); K12(Dimethyl)	73	ETD	14	0	1476.83	3	492.95	1.5	148.08	11272
TLDHFpSSLGSVDSLDHPSSR	1	T(1): 0.0; S(6): 99.6; S(7): 0.4; S(10): 0.0; S(13): 0.0; S(18): 0.0; S(19): 0.0	370	Q13796	Protein Shroom2 OS=Homo sapiens GN=SHROOM2 PE=1 SV=1 - [SHRM2_HUMAN]	1	Q13796	S173	Protein Shroom2 (Apical-like protein) (Protein APXL)	SHROOM2 APXL																									Reverse	Class I	tLDHFsSLGSVDSLDHPSSR	1	N-Term(Dimethyl:2H(4)); S6(Phospho)	67	HCD	31	0	2269.04	3	757.019	-0.42	133.39	11479
ASYHFSPEELDENTpSPLLGDAR	1	S(2): 0.0; Y(3): 0.0; S(6): 0.0; T(14): 0.4; S(15): 99.6	370	O75410	Transforming acidic coiled-coil-containing protein 1 OS=Homo sapiens GN=TACC1 PE=1 SV=2 - [TACC1_HUMAN]	1	O75410	S276	Transforming acidic coiled-coil-containing protein 1 (Gastric cancer antigen Ga55) (Taxin-1)	TACC1 KIAA1103																									Reverse	Class I	aSYHFSPEELDENTsPLLGDAR	1	N-Term(Dimethyl:2H(4)); S15(Phospho)	47	HCD	28	0	2560.15	3	854.055	-1.91	139.28	11818
ITpSEAEDLVANFFPK	1	T(2): 0.0; S(3): 100.0	370	P61289	Proteasome activator complex subunit 3 OS=Homo sapiens GN=PSME3 PE=1 SV=1 - [PSME3_HUMAN]	1	P61289	S24	Proteasome activator complex subunit 3 (11S regulator complex subunit gamma) (REG-gamma) (Activator of multicatalytic protease subunit 3) (Ki nuclear autoantigen) (Proteasome activator 28 subunit gamma) (PA28g) (PA28gamma)	PSME3																									Reverse	Class I	iTsEAEDLVANFFPk	1	N-Term(Dimethyl); S3(Phospho); K15(Dimethyl)	72	ETD	14	0	1816.88	3	606.299	2.54	158.23	11973
IDTHPpSPSHSSTVK	1	T(3): 0.0; S(6): 100.0; S(8): 0.0; S(10): 0.0; S(11): 0.0; T(12): 0.0	370	Q8NI27	THO complex subunit 2 OS=Homo sapiens GN=THOC2 PE=1 SV=1 - [THOC2_HUMAN]	1	Q8NI27	S1302	THO complex subunit 2 (Tho2) (hTREX120)	THOC2 CXorf3																									Reverse	Class I	iDTHPsPSHSSTVk	1	N-Term(Dimethyl:2H(4)); S6(Phospho); K14(Dimethyl:2H(4))	83	ETD	31	0	1636.81	3	546.276	-3.37	29.26	1974
LLSVKGpSPKVDEK	1	S(3): 0.0; S(7): 100.0	370	Q96T58	Msx2-interacting protein OS=Homo sapiens GN=SPEN PE=1 SV=1 - [MINT_HUMAN]	1	Q96T58	S1287	Msx2-interacting protein (SMART/HDAC1-associated repressor protein) (SPEN homolog)	SPEN KIAA0929 MINT SHARP																									Reverse	Class I	lLSVkGsPkVDEk	1	N-Term(Dimethyl:2H(4)); K5(Dimethyl:2H(4)); S7(Phospho); K9(Dimethyl:2H(4)); K13(Dimethyl:2H(4))	85	ETD	31	2	1608	3	536.672	-3	55.53	3413
LSEGFSIHTRDpSPK	1	S(2): 0.0; S(6): 0.0; T(9): 0.0; S(12): 100.0	370	P20618	Proteasome subunit beta type-1 OS=Homo sapiens GN=PSMB1 PE=1 SV=2 - [PSB1_HUMAN]	1	P20618	S68	Proteasome subunit beta type-1 (EC 3.4.25.1) (Macropain subunit C5) (Multicatalytic endopeptidase complex subunit C5) (Proteasome component C5) (Proteasome gamma chain)	PSMB1 PSC5																									Reverse	Class I	lSEGFSIHTRDsPk	1	N-Term(Dimethyl); S12(Phospho); K14(Dimethyl)	62	ETD	32	1	1709.83	3	570.614	0.72	75.77	4740
LSQVNEpSDADDEDNYGAR	1	S(2): 0.0; S(7): 100.0; Y(15): 0.0	370	Q6V0I7	Protocadherin Fat 4 OS=Homo sapiens GN=FAT4 PE=2 SV=2 - [FAT4_HUMAN]	1	Q6V0I7	S4876	Protocadherin Fat 4 (hFat4) (Cadherin family member 14) (FAT tumor suppressor homolog 4) (Fat-like cadherin protein FAT-J)	FAT4 CDHF14 FATJ Nbla00548																									Reverse	Class I	lSQVNEsDADDEDNYGAR	1	N-Term(Dimethyl); S7(Phospho)	72	ETD	13	0	2105.83	3	702.615	1.08	69.25	5051
LLQSAKpTILRGTEEK	1	S(4): 0.0; T(7): 100.0; T(12): 0.0	370	O00418	Elongation factor 2 kinase OS=Homo sapiens GN=EEF2K PE=1 SV=1 - [EF2K_HUMAN]	1	O00418	T348	Eukaryotic elongation factor 2 kinase (eEF-2 kinase) (eEF-2K) (EC 2.7.11.20) (Calcium/calmodulin-dependent eukaryotic elongation factor 2 kinase)	EEF2K																									Reverse	Class I	lLQSAktILRGTEEk	1	N-Term(Dimethyl); K6(Dimethyl); T7(Phospho); K15(Dimethyl)	72	ETD	31	2	1851.03	3	617.683	-1.01	97.61	5717
GAKLpTPEEEEILNK	1	T(5): 100.0	370	P62241	40S ribosomal protein S8 OS=Homo sapiens GN=RPS8 PE=1 SV=2 - [RS8_HUMAN]	1	P62241	T130	40S ribosomal protein S8	RPS8 OK/SW-cl.83																									Reverse	Class I	gAkLtPEEEEILNk	1	N-Term(Dimethyl:2H(4)); K3(Dimethyl:2H(4)); T5(Phospho); K14(Dimethyl:2H(4))	81	ETD	28	1	1746.97	3	582.994	-0.55	104.16	6983
GLHSELGESpSLILK	1	S(4): 0.0; S(9): 0.0; S(10): 100.0	370	P37023	Serine/threonine-protein kinase receptor R3 OS=Homo sapiens GN=ACVRL1 PE=1 SV=2 - [ACVL1_HUMAN]	1	P37023	S161	Serine/threonine-protein kinase receptor R3 (SKR3) (EC 2.7.11.30) (Activin receptor-like kinase 1) (ALK-1) (TGF-B superfamily receptor type I) (TSR-I)	ACVRL1 ACVRLK1 ALK1																									Reverse	Class I	gLHSELGESsLILk	1	N-Term(Dimethyl:2H(4)); S10(Phospho); K14(Dimethyl:2H(4))	83	ETD	29	0	1626.91	3	542.975	8.72	120.87	7032
LLHQFSFpSPEREIR	1	S(6): 0.0; S(8): 100.0	370	Q9UJX6	Anaphase-promoting complex subunit 2 OS=Homo sapiens GN=ANAPC2 PE=1 SV=1 - [ANC2_HUMAN]	1	Q9UJX6	S534	Anaphase-promoting complex subunit 2 (APC2) (Cyclosome subunit 2)	ANAPC2 APC2 KIAA1406																									Reverse	Class I	lLHQFSFsPEREIR	1	N-Term(Dimethyl); S8(Phospho)	63	ETD	32	1	1866.93	3	622.98	0.11	122.65	7122
QIDSpSPVGGETDETTVSQNYR	1	S(4): 0.3; S(5): 99.7; T(11): 0.0; T(14): 0.0; T(15): 0.0; S(17): 0.0; Y(20): 0.0	370	O15027	Protein transport protein Sec16A OS=Homo sapiens GN=SEC16A PE=1 SV=3 - [SC16A_HUMAN]	1	O15027	S391	Protein transport protein Sec16A (SEC16 homolog A)	SEC16A KIAA0310 SEC16 SEC16L																									Reverse	Class I	qIDSsPVGGETDETTVSQNYR	1	N-Term(Dimethyl:2H(4)); S5(Phospho)	109	HCD	14	0	2395.06	2	1198.03	0.16	90.32	7408
VHVQFFDDpSPTRGWVSK	1	S(9): 100.0; T(11): 0.0; S(16): 0.0	370	P52701	DNA mismatch repair protein Msh6 OS=Homo sapiens GN=MSH6 PE=1 SV=2 - [MSH6_HUMAN]	1	P52701	S137	DNA mismatch repair protein Msh6 (hMSH6) (G/T mismatch-binding protein) (GTBP) (GTMBP) (MutS-alpha 160 kDa subunit) (p160)	MSH6 GTBP																									Reverse	Class I	vHVQFFDDsPTRGWVSk	1	N-Term(Dimethyl:2H(4)); S9(Phospho); K17(Dimethyl:2H(4))	70	ETD	32	1	2149.07	3	717.03	1.2	134.96	7733
SSPFKVpSPLTFGR	1	S(1): 0.0; S(2): 0.0; S(7): 100.0; T(10): 0.0	370	O95810	Serum deprivation-response protein OS=Homo sapiens GN=SDPR PE=1 SV=3 - [SDPR_HUMAN]	1	O95810	S293	Serum deprivation-response protein (Cavin-2) (PS-p68) (Phosphatidylserine-binding protein)	SDPR																									Reverse	Class I	sSPFkVsPLTFGR	1	N-Term(Dimethyl); K5(Dimethyl); S7(Phospho)	67	ETD	28	1	1558.8	3	520.271	-2.44	138.49	8976
ESpSPLYSPTFSDSTSAVK	1	S(2): 0.3; S(3): 99.7; Y(6): 0.0; S(7): 0.0; T(9): 0.0; S(11): 0.0; S(13): 0.0; T(14): 0.0; S(15): 0.0	370	P46821	Microtubule-associated protein 1B OS=Homo sapiens GN=MAP1B PE=1 SV=1 - [MAP1B_HUMAN]	1	P46821	S1793	Microtubule-associated protein 1B (MAP-1B) [Cleaved into: MAP1 light chain LC1]	MAP1B																									Reverse	Class I	eSsPLYSPTFSDSTSAVk	1	N-Term(Dimethyl:2H(4)); S3(Phospho); K18(Dimethyl:2H(4))	82	HCD	14	0	2046.98	2	1023.99	0.21	119.53	9046
VLSPLRpSPPLIGSESAYESFLSADDK	1	S(3): 0.0; S(7): 100.0; S(13): 0.0; S(15): 0.0; Y(17): 0.0; S(19): 0.0; S(22): 0.0	370	P46821	Microtubule-associated protein 1B OS=Homo sapiens GN=MAP1B PE=1 SV=1 - [MAP1B_HUMAN]	1	P46821	S1400	Microtubule-associated protein 1B (MAP-1B) [Cleaved into: MAP1 light chain LC1]	MAP1B																									Reverse	Class I	vLSPLRsPPLIGSESAYESFLSADDk	1	N-Term(Dimethyl); S7(Phospho); K26(Dimethyl)	68	HCD	29	1	2914.45	3	972.154	-0.74	145.2	9560
TLSVAAAFNEDEDpSEPEEMPPEAK	1	T(1): 0.0; S(3): 0.0; S(14): 100.0	369	Q8WW12	PEST proteolytic signal-containing nuclear protein OS=Homo sapiens GN=PCNP PE=1 SV=2 - [PCNP_HUMAN]	1	Q8WW12	S119	PEST proteolytic signal-containing nuclear protein (PCNP) (PEST-containing nuclear protein)	PCNP																									Reverse	Class I	tLSVAAAFNEDEDsEPEEMPPEAk	1	N-Term(Dimethyl:2H(4)); S14(Phospho); K24(Dimethyl:2H(4))	73	HCD	14	0	2750.23	3	917.414	1.07	138.78	10500
ATGGLCLLGAYADpSDDDDNDVSEK	1	T(2): 0.0; Y(11): 0.0; S(14): 100.0; S(22): 0.0	369	Q8N3X1	Formin-binding protein 4 OS=Homo sapiens GN=FNBP4 PE=1 SV=2 - [FNBP4_HUMAN]	1	Q8N3X1	S116	Formin-binding protein 4 (Formin-binding protein 30)	FNBP4 FBP30 KIAA1014																									Reverse	Class I	aTGGLcLLGAYADsDDDDNDVSEk	1	N-Term(Dimethyl:2H(4)); C6(Carbamidomethyl); S14(Phospho); K24(Dimethyl:2H(4))	74	HCD	13	0	2645.15	3	882.388	3.08	144.76	11738
KLESTESRSpSFSQHAR	1	S(4): 0.0; T(5): 0.0; S(7): 0.0; S(9): 0.0; S(10): 100.0; S(12): 0.0	369	P02545	Lamin-A/C OS=Homo sapiens GN=LMNA PE=1 SV=1 - [LMNA_HUMAN]	1	P02545	S429	Prelamin-A/C [Cleaved into: Lamin-A/C (70 kDa lamin) (Renal carcinoma antigen NY-REN-32)]	LMNA LMN1																									Reverse	Class I	kLESTESRSsFSQHAR	1	N-Term(Dimethyl); K1(Dimethyl); S10(Phospho)	93	ETD	39	2	1985.95	3	662.654	1.21	32.36	2330
AHpSPAEGASVESSSPGPK	1	S(3): 100.0; S(9): 0.0; S(12): 0.0; S(13): 0.0; S(14): 0.0	369	Q8NFG4	Folliculin OS=Homo sapiens GN=FLCN PE=1 SV=1 - [FLCN_HUMAN]	1	Q8NFG4	S62	Folliculin (BHD skin lesion fibrofolliculoma protein) (Birt-Hogg-Dube syndrome protein)	FLCN BHD																									Reverse	Class I	aHsPAEGASVESSSPGPk	1	N-Term(Dimethyl); S3(Phospho); K18(Dimethyl)	105	HCD	28	0	1830.82	2	915.916	-1.78	39.12	2831
RGSpSFQSGRDDTWR	1	S(3): 0.0; S(4): 100.0; S(7): 0.0; T(12): 0.0	369	Q96KP1	Exocyst complex component 2 OS=Homo sapiens GN=EXOC2 PE=1 SV=1 - [EXOC2_HUMAN]	1	Q96KP1	S432	Exocyst complex component 2 (Exocyst complex component Sec5)	EXOC2 SEC5 SEC5L1																									Reverse	Class I	rGSsFQSGRDDTWR	1	N-Term(Dimethyl); S4(Phospho)	76	ETD	35	2	1762.77	3	588.26	0.46	62.11	3971
QASLEQANpSFPRK	1	S(3): 0.0; S(9): 100.0	369	Q8N699	Myc target protein 1 OS=Homo sapiens GN=MYCT1 PE=2 SV=1 - [MYCT1_HUMAN]	1	Q8N699	S155	Myc target protein 1 (Myc target in myeloid cells protein 1)	MYCT1 MTLC MTMC1																									Reverse	Class I	qASLEQANsFPRk	1	N-Term(Dimethyl:2H(4)); S9(Phospho); K13(Dimethyl:2H(4))	90	ETD	29	1	1619.83	3	540.616	-4.03	65.56	4101
QQTEKPEpSEDEWER	1	T(3): 0.0; S(8): 100.0	369	O60231	Putative pre-mRNA-splicing factor ATP-dependent RNA helicase DHX16 OS=Homo sapiens GN=DHX16 PE=1 SV=2 - [DHX16_HUMAN]	1	O60231	S160	Putative pre-mRNA-splicing factor ATP-dependent RNA helicase DHX16 (EC 3.6.4.13) (ATP-dependent RNA helicase #3) (DEAH-box protein 16)	DHX16 DBP2 DDX16 KIAA0577																									Reverse	Class I	qQTEkPEsEDEWER	1	N-Term(Dimethyl:2H(4)); K5(Dimethyl:2H(4)); S8(Phospho)	61	ETD	28	0	1934.86	3	645.624	-2.31	60.36	4276
RNpSVERPAEPVAGAATPSLVEQQK	1	S(3): 100.0; T(16): 0.0; S(18): 0.0	369	Q9BTC0	Death-inducer obliterator 1 OS=Homo sapiens GN=DIDO1 PE=1 SV=5 - [DIDO1_HUMAN]	1	Q9BTC0	S1456	Death-inducer obliterator 1 (DIO-1) (hDido1) (Death-associated transcription factor 1) (DATF-1)	DIDO1 C20orf158 DATF1 KIAA0333																									Reverse	Class I	rNsVERPAEPVAGAATPSLVEQQk	1	N-Term(Dimethyl); S3(Phospho); K24(Dimethyl)	55	HCD	30	1	2670.36	3	890.792	-0.4	88.3	5863
KEpSMGPPGLESDPEPAALGSSSAHCTNNGVK	1	S(3): 100.0; S(11): 0.0; S(20): 0.0; S(21): 0.0; S(22): 0.0; T(26): 0.0	369	Q86T13	C-type lectin domain family 14 member A OS=Homo sapiens GN=CLEC14A PE=1 SV=1 - [CLC14_HUMAN]	1	Q86T13	S437	C-type lectin domain family 14 member A (Epidermal growth factor receptor 5) (EGFR-5)	CLEC14A C14orf27 EGFR5 UNQ236/PRO269																									Reverse	Class I	kEsmGPPGLESDPEPAALGSSSAHcTNNGVk	1	K1(Dimethyl); N-Term(Dimethyl); S3(Phospho); M4(Oxidation); C25(Carbamidomethyl); K31(Dimethyl)	54	HCD	30	1	3304.48	3	1102.17	-1.74	90.17	5971
RIpSSSSVQPCSEEVSTPQDSLAQCK	1	S(3): 98.3; S(4): 0.8; S(5): 0.8; S(6): 0.0; S(11): 0.0; S(15): 0.0; T(16): 0.0; S(20): 0.0	369	P42694	Probable helicase with zinc finger domain OS=Homo sapiens GN=HELZ PE=1 SV=1 - [HELZ_HUMAN]	1	P42694	S1763	Probable helicase with zinc finger domain (EC 3.6.4.-) (Down-regulated in human cancers protein)	HELZ DRHC KIAA0054																									Reverse	Class I	rIsSSSVQPcSEEVSTPQDSLAQck	1	N-Term(Dimethyl:2H(4)); S3(Phospho); C10(Carbamidomethyl); C24(Carbamidomethyl); K25(Dimethyl:2H(4))	46	HCD	27	1	2924.36	3	975.459	0.39	90.03	6121
EGETQGVAFEHESPADFQNSQpSPVQDQDK	1	T(4): 0.0; S(13): 0.0; S(20): 0.4; S(22): 99.6	369	P78332	RNA-binding protein 6 OS=Homo sapiens GN=RBM6 PE=1 SV=5 - [RBM6_HUMAN]	1	P78332	S362	RNA-binding protein 6 (Lung cancer antigen NY-LU-12) (Protein G16) (RNA-binding motif protein 6) (RNA-binding protein DEF-3)	RBM6 DEF3																									Reverse	Class I	eGETQGVAFEHESPADFQNSQsPVQDQDk	1	N-Term(Dimethyl); S22(Phospho); K29(Dimethyl)	83	HCD	27	0	3340.39	3	1114.13	-12.19	102.64	6670
ILIVTQpTPHYMR	1	T(5): 0.0; T(7): 100.0; Y(10): 0.0	369	Q6PKG0	La-related protein 1 OS=Homo sapiens GN=LARP1 PE=1 SV=2 - [LARP1_HUMAN]	1	Q6PKG0	T649	La-related protein 1 (La ribonucleoprotein domain family member 1)	LARP1 KIAA0731 LARP																									Reverse	Class I	iLIVTQtPHYmR	1	N-Term(Dimethyl); T7(Phospho); M11(Oxidation)	82	ETD	28	0	1595.8	3	532.604	-1.66	100.27	6750
YSpSTETLKDDDLWSSR	1	Y(1): 0.0; S(2): 0.0; S(3): 100.0; T(4): 0.0; T(6): 0.0; S(14): 0.0; S(15): 0.0	369	Q96PE2	Rho guanine nucleotide exchange factor 17 OS=Homo sapiens GN=ARHGEF17 PE=1 SV=1 - [ARHGH_HUMAN]	1	Q96PE2	S395	Rho guanine nucleotide exchange factor 17 (164 kDa Rho-specific guanine-nucleotide exchange factor) (p164-RhoGEF) (p164RhoGEF) (Tumor endothelial marker 4)	ARHGEF17 KIAA0337 TEM4																									Reverse	Class I	ySsTETLkDDDLWSSR	1	N-Term(Dimethyl:2H(4)); S3(Phospho); K8(Dimethyl:2H(4))	88	ETD	28	1	2046.94	3	682.983	-7.31	117.71	7701
LQLRVPpSVESLFR	1	S(7): 100.0; S(10): 0.0	369	Q13439	Golgin subfamily A member 4 OS=Homo sapiens GN=GOLGA4 PE=1 SV=1 - [GOGA4_HUMAN]	1	Q13439	S71	Golgin subfamily A member 4 (256 kDa golgin) (Golgin-245) (Protein 72.1) (Trans-Golgi p230)	GOLGA4																									Reverse	Class I	lQLRVPsVESLFR	1	N-Term(Dimethyl); S7(Phospho)	82	ETD	28	1	1651.9	3	551.303	1.39	149.66	9701
SAMDSPVPASMFAPEPSpSPGAAR	1	S(1): 0.0; S(5): 0.0; S(10): 0.0; S(17): 0.6; S(18): 99.4	368	O00178	GTP-binding protein 1 OS=Homo sapiens GN=GTPBP1 PE=1 SV=3 - [GTPB1_HUMAN]	1	O00178	S25	GTP-binding protein 1 (G-protein 1) (GP-1) (GP1)	GTPBP1																									Reverse	Class I	sAMDSPVPASMFAPEPSsPGAAR	1	N-Term(Dimethyl:2H(4)); S18(Phospho)	56	HCD	14	0	2372.06	3	791.358	-0.88	139.64	10580
RWpSLASLPSSGYGTNTPSSTVSSSCSSQEK	1	S(3): 100.0; S(6): 0.0; S(9): 0.0; S(10): 0.0; Y(12): 0.0; T(14): 0.0; T(16): 0.0; S(18): 0.0; S(19): 0.0; T(20): 0.0; S(22): 0.0; S(23): 0.0; S(24): 0.0; S(26): 0.0; S(27): 0.0	368	Q6P0Q8;O15021	Microtubule-associated serine/threonine-protein kinase 2 OS=Homo sapiens GN=MAST2 PE=1 SV=2 - [MAST2_HUMAN]|Microtubule-associated serine/threonine-protein kinase 4 OS=Homo sapiens GN=MAST4 PE=1 SV=2 - [MAST4_HUMAN]	2	Q6P0Q8	S230	Microtubule-associated serine/threonine-protein kinase 2 (EC 2.7.11.1)	MAST2 KIAA0807 MAST205	O15021	S106	Microtubule-associated serine/threonine-protein kinase 4 (EC 2.7.11.1)	MAST4 KIAA0303																					Reverse	Class I	rWsLASLPSSGYGTNTPSSTVSSScSSQEk	1	N-Term(Dimethyl); S3(Phospho); C25(Carbamidomethyl); K30(Dimethyl)	63	HCD	27	1	3284.47	3	1095.5	-1.68	137.53	11702
NSSQSGGKPGSpSPITK	1	S(2): 0.0; S(3): 0.0; S(5): 0.0; S(11): 0.0; S(12): 100.0; T(15): 0.0	368	Q15648	Mediator of RNA polymerase II transcription subunit 1 OS=Homo sapiens GN=MED1 PE=1 SV=4 - [MED1_HUMAN]	1	Q15648	S1156	Mediator of RNA polymerase II transcription subunit 1 (Activator-recruited cofactor 205 kDa component) (ARC205) (Mediator complex subunit 1) (Peroxisome proliferator-activated receptor-binding protein) (PBP) (PPAR-binding protein) (Thyroid hormone receptor-associated protein complex 220 kDa component) (Trap220) (Thyroid receptor-interacting protein 2) (TR-interacting protein 2) (TRIP-2) (Vitamin …	MED1 ARC205 CRSP1 CRSP200 DRIP205 DRIP230 PBP PPARBP PPARGBP RB18A TRAP220 TRIP2																									Reverse	Class I	nSSQSGGkPGSsPITk	1	N-Term(Dimethyl:2H(4)); K8(Dimethyl:2H(4)); S12(Phospho); K16(Dimethyl:2H(4))	98	ETD	28	0	1707.9	3	569.972	-2.35	31.45	2346
KWDGpSEEDEDNSK	1	S(5): 100.0; S(12): 0.0	368	O60841	Eukaryotic translation initiation factor 5B OS=Homo sapiens GN=EIF5B PE=1 SV=3 - [IF2P_HUMAN]	1	O60841	S164	Eukaryotic translation initiation factor 5B (eIF-5B) (Translation initiation factor IF-2)	EIF5B IF2 KIAA0741																									Reverse	Class I	kWDGsEEDEDNSk	1	N-Term(Dimethyl); K1(Dimethyl); S5(Phospho); K13(Dimethyl)	63	ETD	29	1	1702.67	3	568.228	-8.01	38.36	2554
LNSEApSPSREAINGQR	1	S(3): 0.0; S(6): 100.0; S(8): 0.0	368	Q13111	Chromatin assembly factor 1 subunit A OS=Homo sapiens GN=CHAF1A PE=1 SV=1 - [CAF1A_HUMAN]	1	Q13111	S123	Chromatin assembly factor 1 subunit A (CAF-1 subunit A) (Chromatin assembly factor I p150 subunit) (CAF-I 150 kDa subunit) (CAF-I p150) (hp150)	CHAF1A CAF CAF1P150																									Reverse	Class I	lNSEAsPSREAINGQR	1	N-Term(Dimethyl); S6(Phospho)	83	ETD	28	1	1836.86	3	612.958	-0.52	46.76	3375
ARpSSECLSQAPESHESR	1	S(3): 100.0; S(4): 0.0; S(8): 0.0; S(13): 0.0; S(16): 0.0	368	Q9ULL8	Protein Shroom4 OS=Homo sapiens GN=SHROOM4 PE=1 SV=2 - [SHRM4_HUMAN]	1	Q9ULL8	S664	Protein Shroom4 (Second homolog of apical protein)	SHROOM4 KIAA1202 SHAP																									Reverse	Class I	aRsSEcLSQAPESHESR	1	N-Term(Dimethyl); S3(Phospho); C6(Carbamidomethyl)	65	HCD	33	1	2038.87	2	1019.94	0.25	44.32	3489
QApSTDAGTAGALTPQHVR	1	S(3): 100.0; T(4): 0.0; T(8): 0.0; T(13): 0.0	368	P46937	65 kDa Yes-associated protein OS=Homo sapiens GN=YAP1 PE=1 SV=1 - [YAP1_HUMAN]	1	P46937	S109	Yorkie homolog (65 kDa Yes-associated protein) (YAP65)	YAP1 YAP65																									Reverse	Class I	qAsTDAGTAGALTPQHVR	2	N-Term(Dimethyl:2H(4)); S3(Phospho)	91	HCD	28	0	1892.91	2	946.961	-0.86	61.64	4360
QTTFLGpSPGPRHER	1	T(2): 0.0; T(3): 0.0; S(7): 100.0	368	Q9H0X9	Oxysterol-binding protein-related protein 5 OS=Homo sapiens GN=OSBPL5 PE=1 SV=1 - [OSBL5_HUMAN]	1	Q9H0X9	S747	Oxysterol-binding protein-related protein 5 (ORP-5) (OSBP-related protein 5) (Oxysterol-binding protein homolog 1)	OSBPL5 KIAA1534 OBPH1 ORP5																									Reverse	Class I	qTTFLGsPGPRHER	1	N-Term(Dimethyl); S7(Phospho)	69	ETD	34	1	1690.81	3	564.274	0.3	68.23	4467
ILLGHATKSFPSpSPSK	1	T(7): 0.0; S(9): 0.0; S(12): 0.0; S(13): 100.0; S(15): 0.0	368	Q96KQ7	Histone-lysine N-methyltransferase, H3 lysine-9 specific 3 OS=Homo sapiens GN=EHMT2 PE=1 SV=3 - [EHMT2_HUMAN]	1	Q96KQ7	S119	Histone-lysine N-methyltransferase EHMT2 (EC 2.1.1.-) (EC 2.1.1.43) (Euchromatic histone-lysine N-methyltransferase 2) (HLA-B-associated transcript 8) (Histone H3-K9 methyltransferase 3) (H3-K9-HMTase 3) (Lysine N-methyltransferase 1C) (Protein G9a)	EHMT2 BAT8 C6orf30 G9A KMT1C NG36																									Reverse	Class I	iLLGHATkSFPSsPSk	1	N-Term(Dimethyl); K8(Dimethyl); S13(Phospho); K16(Dimethyl)	71	ETD	31	1	1833.98	3	611.999	-2.41	78.42	4594
GKGGVTGpSPEASISGpSKGDLK	2	T(6): 0.0; S(8): 100.0; S(12): 0.0; S(14): 0.0; S(16): 100.0	368	Q09666	Neuroblast differentiation-associated protein AHNAK OS=Homo sapiens GN=AHNAK PE=1 SV=2 - [AHNK_HUMAN]	1	Q09666	S5731, S5739	Neuroblast differentiation-associated protein AHNAK (Desmoyokin)	AHNAK PM227																									Reverse	Class I	gkGGVTGsPEASISGskGDLk	1	N-Term(Dimethyl:2H(4)); K2(Dimethyl:2H(4)); S8(Phospho); S16(Phospho); K17(Dimethyl:2H(4)); K21(Dimethyl:2H(4))	89	ETD	28	2	2220.16	3	740.724	-2.48	69.19	4821
REGPVGGEpSDSEEMFEK	1	S(9): 100.0; S(11): 0.0	368	Q9Y4B5	Uncharacterized protein KIAA0802 OS=Homo sapiens GN=KIAA0802 PE=1 SV=3 - [K0802_HUMAN]	1	Q9Y4B5	S767	Coiled-coil domain-containing protein 165	CCDC165 KIAA0802																									Reverse	Class I	rEGPVGGEsDSEEmFEk	1	N-Term(Dimethyl:2H(4)); S9(Phospho); M14(Oxidation); K17(Dimethyl:2H(4))	59	ETD	28	1	2042.88	3	681.632	-2.9	70.67	4930
SSGSPYGGGYGSGGGpSGGYGSR	1	S(1): 0.0; S(2): 0.0; S(4): 0.0; Y(6): 0.0; Y(10): 0.0; S(12): 0.0; S(16): 100.0; Y(19): 0.0; S(21): 0.0	368	P51991	Heterogeneous nuclear ribonucleoprotein A3 OS=Homo sapiens GN=HNRNPA3 PE=1 SV=2 - [ROA3_HUMAN]	1	P51991	S370	Heterogeneous nuclear ribonucleoprotein A3 (hnRNP A3)	HNRNPA3 HNRPA3																									Reverse	Class I	sSGSPYGGGYGSGGGsGGYGSR	1	N-Term(Dimethyl); S16(Phospho)	114	ETD	14	0	2018.78	3	673.598	-4.22	67.59	5074
RVpSLVGADDLRK	1	S(3): 100.0	368	Q14160	Protein LAP4 OS=Homo sapiens GN=SCRIB PE=1 SV=3 - [LAP4_HUMAN]	1	Q14160	S1378	Protein scribble homolog (Scribble) (hScrib) (Protein LAP4)	SCRIB CRIB1 KIAA0147 LAP4 SCRB1 VARTUL																									Reverse	Class I	rVsLVGADDLRk	1	N-Term(Dimethyl); S3(Phospho); K12(Dimethyl)	72	ETD	32	2	1464.8	3	488.937	1.49	82.97	5121
DVYLpSPRDDGYSTK	1	Y(3): 0.0; S(5): 100.0; Y(11): 0.0; S(12): 0.0; T(13): 0.0	368	P38159	Heterogeneous nuclear ribonucleoprotein G OS=Homo sapiens GN=RBMX PE=1 SV=3 - [HNRPG_HUMAN]	1	P38159	S208	RNA-binding motif protein, X chromosome (Glycoprotein p43) (Heterogeneous nuclear ribonucleoprotein G) (hnRNP G) [Cleaved into: RNA-binding motif protein, X chromosome, N-terminally processed]	RBMX HNRPG RBMXP1																									Reverse	Class I	dVYLsPRDDGYSTk	1	N-Term(Dimethyl:2H(4)); S5(Phospho); K14(Dimethyl:2H(4))	82	ETD	27	1	1759.82	3	587.279	-9.44	86.28	5698
RKpSELEFETLK	1	S(3): 100.0; T(9): 0.0	368	Q5JSH3	WD repeat-containing protein 44 OS=Homo sapiens GN=WDR44 PE=1 SV=1 - [WDR44_HUMAN]	1	Q5JSH3	S262	WD repeat-containing protein 44 (Rabphilin-11)	WDR44																									Reverse	Class I	rksELEFETLk	1	N-Term(Dimethyl:2H(4)); K2(Dimethyl:2H(4)); S3(Phospho); K11(Dimethyl:2H(4))	67	ETD	33	2	1555.89	3	519.301	-0.82	94.69	5725
RLGGLRPEpSPESLTSVSR	1	S(9): 100.0; S(12): 0.0; T(14): 0.0; S(15): 0.0; S(17): 0.0	368	Q9H6F5	Coiled-coil domain-containing protein 86 OS=Homo sapiens GN=CCDC86 PE=1 SV=1 - [CCD86_HUMAN]	1	Q9H6F5	S18	Coiled-coil domain-containing protein 86 (Cytokine-induced protein with coiled-coil domain)	CCDC86 CYCLON																									Reverse	Class I	rLGGLRPEsPESLTSVSR	1	N-Term(Dimethyl:2H(4)); S9(Phospho)	65	ETD	33	1	2053.07	3	685.03	0.01	99.58	5944
SASQSpSLDKLDQELK	1	S(1): 0.0; S(3): 0.0; S(5): 0.0; S(6): 100.0	368	O60271	C-jun-amino-terminal kinase-interacting protein 4 OS=Homo sapiens GN=SPAG9 PE=1 SV=4 - [JIP4_HUMAN]	1	O60271	S733	C-Jun-amino-terminal kinase-interacting protein 4 (JIP-4) (JNK-interacting protein 4) (Cancer/testis antigen 89) (CT89) (Human lung cancer oncogene 6 protein) (HLC-6) (JNK-associated leucine-zipper protein) (JLP) (Mitogen-activated protein kinase 8-interacting protein 4) (Proliferation-inducing protein 6) (Protein highly expressed in testis) (PHET) (Sperm surface protein) (Sperm-associated antige…	SPAG9 HSS KIAA0516 MAPK8IP4 SYD1 HLC6																									Reverse	Class I	sASQSsLDkLDQELk	1	N-Term(Dimethyl); S6(Phospho); K9(Dimethyl); K15(Dimethyl)	73	ETD	27	1	1812.9	3	604.973	2.27	107.3	7275
VRpSLLGLSNSEPNGSVETK	1	S(3): 100.0; S(8): 0.0; S(10): 0.0; S(15): 0.0; T(18): 0.0	368	Q13033	Striatin-3 OS=Homo sapiens GN=STRN3 PE=1 SV=2 - [STRN3_HUMAN]	1	Q13033	S202	Striatin-3 (Cell cycle autoantigen SG2NA) (S/G2 antigen)	STRN3 GS2NA SG2NA																									Reverse	Class I	vRsLLGLSNSEPNGSVETk	1	N-Term(Dimethyl); S3(Phospho); K19(Dimethyl)	90	ETD	28	1	2123.07	3	708.362	-2.12	112.58	7467
TPHDILEDINApSPEMR	1	T(1): 0.0; S(12): 100.0	368	Q9Y6Q9	Nuclear receptor coactivator 3 OS=Homo sapiens GN=NCOA3 PE=1 SV=1 - [NCOA3_HUMAN]	1	Q9Y6Q9	S214	Nuclear receptor coactivator 3 (NCoA-3) (EC 2.3.1.48) (ACTR) (Amplified in breast cancer 1 protein) (AIB-1) (CBP-interacting protein) (pCIP) (Class E basic helix-loop-helix protein 42) (bHLHe42) (Receptor-associated coactivator 3) (RAC-3) (Steroid receptor coactivator protein 3) (SRC-3) (Thyroid hormone receptor activator molecule 1) (TRAM-1)	NCOA3 AIB1 BHLHE42 RAC3 TRAM1																									Reverse	Class I	tPHDILEDINAsPEmR	1	N-Term(Dimethyl); S12(Phospho); M15(Oxidation)	59	ETD	29	0	1961.87	3	654.627	-1	117.36	7760
QRTLpSMIEEEIR	1	T(3): 0.0; S(5): 100.0	368	Q9Y2D5	A-kinase anchor protein 2 OS=Homo sapiens GN=AKAP2 PE=1 SV=2 - [AKAP2_HUMAN]	1	Q9Y2D5	S720	A-kinase anchor protein 2 (AKAP-2) (AKAP-KL) (Protein kinase A-anchoring protein 2) (PRKA2)	AKAP2 KIAA0920 PRKA2																									Reverse	Class I	qRTLsMIEEEIR	1	N-Term(Dimethyl); S5(Phospho)	72	ETD	29	1	1612.78	3	538.264	1.33	135.67	7824
SKFDpSDEEEEDTENVEAASSGK	1	S(1): 0.4; S(5): 99.6; T(12): 0.0; S(19): 0.0; S(20): 0.0	368	Q8TF01	Splicing factor, arginine/serine-rich 18 OS=Homo sapiens GN=SFRS18 PE=1 SV=2 - [SFR18_HUMAN]	1	Q8TF01	S290	Arginine/serine-rich protein PNISR (PNN-interacting serine/arginine-rich protein) (SR-related protein) (SR-rich protein) (Serine/arginine-rich-splicing regulatory protein 130) (SRrp130) (Splicing factor, arginine/serine-rich 130) (Splicing factor, arginine/serine-rich 18)	PNISR C6orf111 SFRS18 SRRP130 HSPC261 HSPC306																									Reverse	Class I	skFDsDEEEEDTENVEAASSGk	1	N-Term(Dimethyl:2H(4)); K2(Dimethyl:2H(4)); S5(Phospho); K22(Dimethyl:2H(4))	58	HCD	27	1	2579.15	3	860.389	8.48	98.77	8086
SVpSENSLVAMDFSGQTGR	1	S(1): 0.0; S(3): 100.0; S(6): 0.0; S(13): 0.0; T(16): 0.0	367	Q13322	Growth factor receptor-bound protein 10 OS=Homo sapiens GN=GRB10 PE=1 SV=2 - [GRB10_HUMAN]	1	Q13322	S428	Growth factor receptor-bound protein 10 (GRB10 adapter protein) (Insulin receptor-binding protein Grb-IR)	GRB10 GRBIR KIAA0207																									Reverse	Class I	sVsENSLVAMDFSGQTGR	1	N-Term(Dimethyl); S3(Phospho)	118	ETD	13	0	1992.87	3	664.963	0.57	139.19	10164
RSDpSPENKYSDSTGHSK	1	S(2): 0.0; S(4): 100.0; Y(9): 0.0; S(10): 0.0; S(12): 0.0; T(13): 0.0; S(16): 0.0	367	Q9BTA9	WW domain-containing adapter protein with coiled-coil OS=Homo sapiens GN=WAC PE=1 SV=3 - [WAC_HUMAN]	1	Q9BTA9	S64	WW domain-containing adapter protein with coiled-coil	WAC KIAA1844																									Reverse	Class I	rSDsPENkYSDSTGHSk	1	N-Term(Dimethyl:2H(4)); S4(Phospho); K8(Dimethyl:2H(4)); K17(Dimethyl:2H(4))	91	ETD	36	2	2070.98	3	690.998	-3.89	25.81	1885
TKYGpSQEHPIGDK	1	T(1): 0.0; Y(3): 0.0; S(5): 100.0	367	Q14644	Ras GTPase-activating protein 3 OS=Homo sapiens GN=RASA3 PE=1 SV=3 - [RASA3_HUMAN]	1	Q14644	S809	Ras GTPase-activating protein 3 (GAP1(IP4BP)) (Ins P4-binding protein)	RASA3																									Reverse	Class I	tkYGsQEHPIGDk	1	N-Term(Dimethyl:2H(4)); K2(Dimethyl:2H(4)); S5(Phospho); K13(Dimethyl:2H(4))	62	ETD	32	1	1635.85	3	545.956	-0.52	40.33	2695
KQNVSTSNSGpSMPNLAQK	1	S(5): 0.0; T(6): 0.0; S(7): 0.0; S(9): 0.0; S(11): 100.0	367	Q9Y2L6	FERM domain-containing protein 4B OS=Homo sapiens GN=FRMD4B PE=1 SV=2 - [FRM4B_HUMAN]	1	Q9Y2L6	S724	FERM domain-containing protein 4B (GRP1-binding protein GRSP1)	FRMD4B KIAA1013																									Reverse	Class I	kQNVSTSNSGsmPNLAQk	1	N-Term(Dimethyl:2H(4)); K1(Dimethyl:2H(4)); S11(Phospho); M12(Oxidation); K18(Dimethyl:2H(4))	86	ETD	29	1	2083.06	3	695.025	-1.49	36.9	2697
SPVGKpSPPSTGSTYGSSQK	1	S(1): 0.0; S(6): 100.0; S(9): 0.0; T(10): 0.0; S(12): 0.0; T(13): 0.0; Y(14): 0.0; S(16): 0.0; S(17): 0.0	367	Q9Y2W1	Thyroid hormone receptor-associated protein 3 OS=Homo sapiens GN=THRAP3 PE=1 SV=2 - [TR150_HUMAN]	1	Q9Y2W1	S320	Thyroid hormone receptor-associated protein 3 (Thyroid hormone receptor-associated protein complex 150 kDa component) (Trap150)	THRAP3 TRAP150																									Reverse	Class I	sPVGksPPSTGSTYGSSQk	1	N-Term(Dimethyl:2H(4)); K5(Dimethyl:2H(4)); S6(Phospho); K19(Dimethyl:2H(4))	83	ETD	28	1	2028.04	3	676.685	-1.08	43.6	3152
DIIRQPpSEEEIIK	1	S(7): 100.0	367	Q15121	Astrocytic phosphoprotein PEA-15 OS=Homo sapiens GN=PEA15 PE=1 SV=2 - [PEA15_HUMAN]	1	Q15121	S116	Astrocytic phosphoprotein PEA-15 (15 kDa phosphoprotein enriched in astrocytes) (Phosphoprotein enriched in diabetes) (PED)	PEA15																									Reverse	Class I	dIIRQPsEEEIIk	1	N-Term(Dimethyl); S7(Phospho); K13(Dimethyl)	63	ETD	27	1	1705.87	3	569.293	-7.04	110.51	7140
RNpSRLGFLYDLDK	1	S(3): 100.0; Y(9): 0.0	367	Q6ZS17	Protein FAM65A OS=Homo sapiens GN=FAM65A PE=1 SV=1 - [FA65A_HUMAN]	1	Q6ZS17	S114	Protein FAM65A	FAM65A KIAA1930																									Reverse	Class I	rNsRLGFLYDLDk	1	N-Term(Dimethyl:2H(4)); S3(Phospho); K13(Dimethyl:2H(4))	64	ETD	33	2	1740.93	3	580.981	0.75	135.28	7898
KLpSLGQYDNDAGGQLPFSK	1	S(3): 100.0; Y(7): 0.0; S(18): 0.0	367	Q68CZ2	Tensin-3 OS=Homo sapiens GN=TNS3 PE=1 SV=2 - [TENS3_HUMAN]	1	Q68CZ2	S776	Tensin-3 (Tensin-like SH2 domain-containing protein 1) (Tumor endothelial marker 6)	TNS3 TEM6 TENS1 TPP																									Reverse	Class I	kLsLGQYDNDAGGQLPFSk	1	N-Term(Dimethyl); K1(Dimethyl); S3(Phospho); K19(Dimethyl)	86	ETD	28	1	2202.08	3	734.699	-0.55	137.47	8915
RSpSGFISELPSEEGK	1	S(2): 0.0; S(3): 100.0; S(7): 0.0; S(11): 0.0	367	Q5VZK9	Leucine-rich repeat-containing protein 16A OS=Homo sapiens GN=LRRC16A PE=1 SV=1 - [LR16A_HUMAN]	1	Q5VZK9	S968	Leucine-rich repeat-containing protein 16A (CARMIL homolog)	LRRC16A CARMIL LRRC16																									Reverse	Class I	rSsGFISELPSEEGk	1	N-Term(Dimethyl); S3(Phospho); K15(Dimethyl)	78	ETD	28	1	1758.83	3	586.95	2	117.12	9837
SApTPVNCEQPDILVSSTPINEGQTVLDK	1	S(1): 0.7; T(3): 99.3; S(15): 0.0; S(16): 0.0; T(17): 0.0; T(24): 0.0	366	P82094	TATA element modulatory factor OS=Homo sapiens GN=TMF1 PE=1 SV=1 - [TMF1_HUMAN]	1	P82094	T401	TATA element modulatory factor (TMF) (Androgen receptor coactivator 160 kDa protein) (Androgen receptor-associated protein of 160 kDa)	TMF1 ARA160																									Reverse	Class I	sAtPVNcEQPDILVSSTPINEGQTVLDk	1	N-Term(Dimethyl); T3(Phospho); C7(Carbamidomethyl); K28(Dimethyl)	56	HCD	13	0	3148.52	3	1050.18	1.5	140.08	10229
FGQAATMEGIGAIGGpTPPAFNR	1	T(6): 0.0; T(16): 100.0	366	Q15233	Non-POU domain-containing octamer-binding protein OS=Homo sapiens GN=NONO PE=1 SV=4 - [NONO_HUMAN]	1	Q15233	T450	Non-POU domain-containing octamer-binding protein (NonO protein) (54 kDa nuclear RNA- and DNA-binding protein) (55 kDa nuclear protein) (DNA-binding p52/p100 complex, 52 kDa subunit) (NMT55) (p54(nrb)) (p54nrb)	NONO NRB54																									Reverse	Class I	fGQAATmEGIGAIGGtPPAFNR	1	N-Term(Dimethyl:2H(4)); M7(Oxidation); T16(Phospho)	100	HCD	14	0	2291.09	2	1146.05	1.01	138.35	11617
ATENDIANFFpSPLNPIR	1	T(2): 0.0; S(11): 100.0	366	P31942	Heterogeneous nuclear ribonucleoprotein H3 OS=Homo sapiens GN=HNRNPH3 PE=1 SV=2 - [HNRH3_HUMAN]	1	P31942	S216	Heterogeneous nuclear ribonucleoprotein H3 (hnRNP H3) (Heterogeneous nuclear ribonucleoprotein 2H9) (hnRNP 2H9)	HNRNPH3 HNRPH3																									Reverse	Class I	aTENDIANFFsPLNPIR	1	N-Term(Dimethyl); S11(Phospho)	62	ETD	14	0	2026.96	3	676.326	0.42	153.9	11679
TTSQAHSLPLpSPASTR	1	T(1): 0.0; T(2): 0.0; S(3): 0.0; S(7): 0.0; S(11): 100.0; S(14): 0.0; T(15): 0.0	366	P19838	Nuclear factor NF-kappa-B p105 subunit OS=Homo sapiens GN=NFKB1 PE=1 SV=2 - [NFKB1_HUMAN]	1	P19838	S907	Nuclear factor NF-kappa-B p105 subunit (DNA-binding factor KBF1) (EBP-1) (Nuclear factor of kappa light polypeptide gene enhancer in B-cells 1) [Cleaved into: Nuclear factor NF-kappa-B p50 subunit]	NFKB1																									Reverse	Class I	tTSQAHSLPLsPASTR	1	N-Term(Dimethyl); S11(Phospho)	91	ETD	28	0	1761.85	3	587.954	-2.55	75.34	5229
SSpSLEGFHNHFK	1	S(1): 0.0; S(2): 0.0; S(3): 100.0	366	Q13480	GRB2-associated-binding protein 1 OS=Homo sapiens GN=GAB1 PE=1 SV=2 - [GAB1_HUMAN]	1	Q13480	S419	GRB2-associated-binding protein 1 (GRB2-associated binder 1) (Growth factor receptor bound protein 2-associated protein 1)	GAB1																									Reverse	Class I	sSsLEGFHNHFk	1	N-Term(Dimethyl); S3(Phospho); K12(Dimethyl)	55	ETD	34	0	1525.69	3	509.233	1.06	83.44	5389
TSTDRHSLpSLDDIR	1	T(1): 0.0; S(2): 0.0; T(3): 0.0; S(7): 0.0; S(9): 100.0	366	Q96NE9	FERM domain-containing protein 6 OS=Homo sapiens GN=FRMD6 PE=2 SV=1 - [FRMD6_HUMAN]	1	Q96NE9	S544	FERM domain-containing protein 6 (Willin)	FRMD6 C14orf31																									Reverse	Class I	tSTDRHSLsLDDIR	1	N-Term(Dimethyl); S9(Phospho)	74	ETD	33	1	1723.8	3	575.273	1.09	89.04	5435
LDSQPQETpSPELPR	1	S(3): 0.0; T(8): 0.0; S(9): 100.0	366	O14545	TRAF-type zinc finger domain-containing protein 1 OS=Homo sapiens GN=TRAFD1 PE=1 SV=1 - [TRAD1_HUMAN]	1	O14545	S415	TRAF-type zinc finger domain-containing protein 1 (Protein FLN29)	TRAFD1 FLN29																									Reverse	Class I	lDSQPQETsPELPR	1	N-Term(Dimethyl); S9(Phospho)	84	ETD	14	0	1704.78	3	568.933	0.18	80.03	6106
RIHAESLLLDpSPAVAK	1	S(6): 0.0; S(11): 100.0	366	Q9H4L5	Oxysterol-binding protein-related protein 3 OS=Homo sapiens GN=OSBPL3 PE=1 SV=1 - [OSBL3_HUMAN]	1	Q9H4L5	S410	Oxysterol-binding protein-related protein 3 (ORP-3) (OSBP-related protein 3)	OSBPL3 KIAA0704 ORP3 OSBP3																									Reverse	Class I	rIHAESLLLDsPAVAk	1	N-Term(Dimethyl); S11(Phospho); K16(Dimethyl)	105	ETD	35	1	1856.01	3	619.34	0.91	113.7	6959
DIEISpTEEEKDTGDLK	1	S(5): 0.0; T(6): 100.0; T(12): 0.0	366	Q4G0J3	La-related protein 7 OS=Homo sapiens GN=LARP7 PE=1 SV=1 - [LARP7_HUMAN]	1	Q4G0J3	T338	La-related protein 7 (La ribonucleoprotein domain family member 7) (P-TEFb-interaction protein for 7SK stability) (PIP7S)	LARP7 HDCMA18P																									Reverse	Class I	dIEIStEEEkDTGDLk	1	N-Term(Dimethyl); T6(Phospho); K10(Dimethyl); K16(Dimethyl)	103	ETD	26	1	1985.92	3	662.646	1.84	104.65	7263
KIpSTEIEFPEKLEETK	1	S(3): 99.9; T(4): 0.1; T(15): 0.0	366	Q14D04	Ventricular zone-expressed PH domain-containing protein homolog 1 OS=Homo sapiens GN=VEPH1 PE=1 SV=1 - [MELT_HUMAN]	1	Q14D04	S380	Ventricular zone-expressed PH domain-containing protein homolog 1 (Protein melted)	VEPH1 KIAA1692 VEPH																									Reverse	Class I	kIsTEIEFPEkLEETk	1	K1(Dimethyl); N-Term(Dimethyl); S3(Phospho); K11(Dimethyl); K16(Dimethyl)	65	ETD	30	2	2113.11	3	705.043	3.06	124.25	7614
LSSFSpSRDSLWNR	1	S(2): 0.0; S(3): 0.0; S(5): 0.0; S(6): 100.0; S(9): 0.0	366	Q9ULH1	130 kDa phosphatidylinositol 4,5-biphosphate-dependent ARF1 GTPase-activating protein OS=Homo sapiens GN=DDEF1 PE=1 SV=3 - [DDEF1_HUMAN]	1	Q9ULH1	S13	Arf-GAP with SH3 domain, ANK repeat and PH domain-containing protein 1 (130 kDa phosphatidylinositol 4,5-bisphosphate-dependent ARF1 GTPase-activating protein) (ADP-ribosylation factor-directed GTPase-activating protein 1) (ARF GTPase-activating protein 1) (Development and differentiation-enhancing factor 1) (DEF-1) (Differentiation-enhancing factor 1) (PIP2-dependent ARF1 GAP)	ASAP1 DDEF1 KIAA1249																									Reverse	Class I	lSSFSsRDSLWNR	1	N-Term(Dimethyl); S6(Phospho)	82	ETD	29	1	1662.76	3	554.926	-0.61	122.78	8079
TSLDIEEYpSDTEVQK	1	T(1): 0.0; S(2): 0.0; Y(8): 2.5; S(9): 97.5; T(11): 0.0	366	P51580	Thiopurine S-methyltransferase OS=Homo sapiens GN=TPMT PE=1 SV=1 - [TPMT_HUMAN]	1	P51580	S14	Thiopurine S-methyltransferase (EC 2.1.1.67) (Thiopurine methyltransferase)	TPMT																									Reverse	Class I	tSLDIEEYsDTEVQk	1	N-Term(Dimethyl); S9(Phospho); K15(Dimethyl)	84	ETD	14	0	1892.84	3	631.618	-0.34	116.75	8854
DDGVFVQEVTQNpSPAAR	1	T(10): 0.0; S(13): 100.0	366	Q09666	Neuroblast differentiation-associated protein AHNAK OS=Homo sapiens GN=AHNAK PE=1 SV=2 - [AHNK_HUMAN]	1	Q09666	S41	Neuroblast differentiation-associated protein AHNAK (Desmoyokin)	AHNAK PM227																									Reverse	Class I	dDGVFVQEVTQNsPAAR	1	N-Term(Dimethyl); S13(Phospho)	91	ETD	13	0	1940.88	3	647.631	1.72	122.14	8936
SEDDSAKFDpSNEEDSASVFSPSFGLK	1	S(1): 0.0; S(5): 0.0; S(10): 100.0; S(15): 0.0; S(17): 0.0; S(20): 0.0; S(22): 0.0	365	Q02880	DNA topoisomerase 2-beta OS=Homo sapiens GN=TOP2B PE=1 SV=3 - [TOP2B_HUMAN]	1	Q02880	S1466	DNA topoisomerase 2-beta (EC 5.99.1.3) (DNA topoisomerase II, beta isozyme)	TOP2B																									Reverse	Class I	sEDDSAkFDsNEEDSASVFSPSFGLk	1	N-Term(Dimethyl:2H(4)); K7(Dimethyl:2H(4)); S10(Phospho); K26(Dimethyl:2H(4))	62	HCD	27	1	2971.4	3	991.139	16.61	149.66	12598
LSSLRApSTSKSESSQK	1	S(2): 0.0; S(3): 0.0; S(7): 100.0; T(8): 0.0; S(9): 0.0; S(11): 0.0; S(13): 0.0; S(14): 0.0	365	P62753	40S ribosomal protein S6 OS=Homo sapiens GN=RPS6 PE=1 SV=1 - [RS6_HUMAN]	1	P62753	S240	40S ribosomal protein S6 (Phosphoprotein NP33)	RPS6 OK/SW-cl.2																									Reverse	Class I	lSSLRAsTSkSESSQk	1	N-Term(Dimethyl:2H(4)); S7(Phospho); K10(Dimethyl:2H(4)); K16(Dimethyl:2H(4))	82	ETD	31	2	1872.02	3	624.677	-2.7	33.45	2191
AGGApSPAASSTAQPPTQHR	1	S(5): 100.0; S(9): 0.0; S(10): 0.0; T(11): 0.0; T(16): 0.0	365	Q8IU81	Interferon regulatory factor 2-binding protein 1 OS=Homo sapiens GN=IRF2BP1 PE=1 SV=1 - [I2BP1_HUMAN]	1	Q8IU81	S453	Interferon regulatory factor 2-binding protein 1 (IRF-2-binding protein 1) (IRF-2BP1)	IRF2BP1																									Reverse	Class I	aGGAsPAASSTAQPPTQHR	1	N-Term(Dimethyl:2H(4)); S5(Phospho)	95	HCD	28	0	1903.9	2	952.452	0.5	39.06	2886
KSPVGKpSPPSTGSTYGSSQK	1	S(2): 0.0; S(7): 99.8; S(10): 0.2; T(11): 0.0; S(13): 0.0; T(14): 0.0; Y(15): 0.0; S(17): 0.0; S(18): 0.0	365	Q9Y2W1	Thyroid hormone receptor-associated protein 3 OS=Homo sapiens GN=THRAP3 PE=1 SV=2 - [TR150_HUMAN]	1	Q9Y2W1	S320	Thyroid hormone receptor-associated protein 3 (Thyroid hormone receptor-associated protein complex 150 kDa component) (Trap150)	THRAP3 TRAP150																									Reverse	Class I	kSPVGksPPSTGSTYGSSQk	1	K1(Dimethyl); N-Term(Dimethyl); K6(Dimethyl); S7(Phospho); K20(Dimethyl)	105	ETD	31	2	2172.09	3	724.703	-0.44	43.26	2897
EVDATpSPAPSTSSTVK	1	T(5): 0.0; S(6): 100.0; S(10): 0.0; T(11): 0.0; S(12): 0.0; S(13): 0.0; T(14): 0.0	365	Q16666	Gamma-interferon-inducible protein Ifi-16 OS=Homo sapiens GN=IFI16 PE=1 SV=3 - [IF16_HUMAN]	1	Q16666	S106	Gamma-interferon-inducible protein 16 (Ifi-16) (Interferon-inducible myeloid differentiation transcriptional activator)	IFI16 IFNGIP1																									Reverse	Class I	eVDATsPAPSTSSTVk	1	N-Term(Dimethyl); S6(Phospho); K16(Dimethyl)	83	ETD	14	0	1712.8	3	571.604	-0.73	47.03	3390
SKpSIEEREEEYQR	1	S(1): 0.0; S(3): 100.0; Y(11): 0.0	365	Q15032	R3H domain-containing protein 1 OS=Homo sapiens GN=R3HDM1 PE=1 SV=3 - [R3HD1_HUMAN]	1	Q15032	S282	R3H domain-containing protein 1	R3HDM1 KIAA0029 R3HDM																									Reverse	Class I	sksIEEREEEYQR	1	N-Term(Dimethyl:2H(4)); K2(Dimethyl:2H(4)); S3(Phospho)	44	ETD	33	2	1826.88	3	609.63	-0.87	52.99	3457
AEpSPESSAIESTQSTPQK	1	S(3): 100.0; S(6): 0.0; S(7): 0.0; S(11): 0.0; T(12): 0.0; S(14): 0.0; T(15): 0.0	365	Q9NTI5	Sister chromatid cohesion protein PDS5 homolog B OS=Homo sapiens GN=PDS5B PE=1 SV=1 - [PDS5B_HUMAN]	1	Q9NTI5	S1358	Sister chromatid cohesion protein PDS5 homolog B (Androgen-induced proliferation inhibitor) (Androgen-induced prostate proliferative shutoff-associated protein AS3)	PDS5B APRIN AS3 KIAA0979																									Reverse	Class I	aEsPESSAIESTQSTPQk	1	N-Term(Dimethyl:2H(4)); S3(Phospho); K18(Dimethyl:2H(4))	96	HCD	13	0	2020.96	2	1010.98	0.7	65.22	4728
TLDRpSGDLGDMEPLK	1	T(1): 0.0; S(5): 100.0	365	O60716	Catenin delta-1 OS=Homo sapiens GN=CTNND1 PE=1 SV=1 - [CTND1_HUMAN]	1	O60716	S920	Catenin delta-1 (Cadherin-associated Src substrate) (CAS) (p120 catenin) (p120(ctn)) (p120(cas))	CTNND1 KIAA0384																									Reverse	Class I	tLDRsGDLGDMEPLk	1	N-Term(Dimethyl:2H(4)); S5(Phospho); K15(Dimethyl:2H(4))	79	ETD	27	1	1790.87	3	597.628	-8	110.57	7143
QKpTVDIDDAQILPR	1	T(3): 100.0	365	Q6GYQ0	GTPase-activating Rap/Ran-GAP domain-like 1 OS=Homo sapiens GN=GARNL1 PE=1 SV=1 - [GRIPE_HUMAN]	1	Q6GYQ0	T754	Ral GTPase-activating protein subunit alpha-1 (GAP-related-interacting partner to E12) (GRIPE) (GTPase-activating Rap/Ran-GAP domain-like 1) (Tuberin-like protein 1) (p240)	RALGAPA1 GARNL1 KIAA0884 TULIP1																									Reverse	Class I	qktVDIDDAQILPR	1	N-Term(Dimethyl); K2(Dimethyl); T3(Phospho)	78	ETD	28	1	1747.9	3	583.304	-1.74	118.48	7818
DLFNGLDpSEEEKDGEEK	1	S(8): 100.0	365	Q96S90	LysM and putative peptidoglycan-binding domain-containing protein 1 OS=Homo sapiens GN=LYSMD1 PE=1 SV=1 - [LYSM1_HUMAN]	1	Q96S90	S99	LysM and putative peptidoglycan-binding domain-containing protein 1	LYSMD1 SB145																									Reverse	Class I	dLFNGLDsEEEkDGEEk	1	N-Term(Dimethyl); S8(Phospho); K12(Dimethyl); K17(Dimethyl)	71	ETD	26	1	2117.92	3	706.645	2.41	126.73	8774
RSpSPAAFINPPIGTVTPALK	1	S(2): 0.0; S(3): 100.0; T(14): 0.0; T(16): 0.0	365	Q9BY77	Polymerase delta-interacting protein 3 OS=Homo sapiens GN=POLDIP3 PE=1 SV=2 - [PDIP3_HUMAN]	1	Q9BY77	S127	Polymerase delta-interacting protein 3 (46 kDa DNA polymerase delta interaction protein) (p46) (S6K1 Aly/REF-like target) (SKAR)	POLDIP3 KIAA1649 PDIP46																									Reverse	Class I	rSsPAAFINPPIGTVTPALk	1	N-Term(Dimethyl); S3(Phospho); K20(Dimethyl)	114	ETD	28	1	2173.17	3	725.063	-1.56	137.98	8945
MVGpSPDTVGMNYGSYMEEK	1	S(4): 100.0; T(7): 0.0; Y(12): 0.0; S(14): 0.0; Y(15): 0.0	365	P11308	Transcriptional regulator ERG OS=Homo sapiens GN=ERG PE=1 SV=2 - [ERG_HUMAN]	1	P11308	S103	Transcriptional regulator ERG (Transforming protein ERG)	ERG																									Reverse	Class I	mVGsPDTVGMNYGSYMEEk	1	N-Term(Dimethyl); S4(Phospho); K19(Dimethyl)	77	ETD	13	0	2230.91	3	744.309	0.8	136.94	9988
DLGQpSNSDLDMPFAK	1	S(5): 100.0; S(7): 0.0	364	Q86W92	Liprin-beta-1 OS=Homo sapiens GN=PPFIBP1 PE=1 SV=2 - [LIPB1_HUMAN]	1	Q86W92	S636	Liprin-beta-1 (Protein tyrosine phosphatase receptor type f polypeptide-interacting protein-binding protein 1) (PTPRF-interacting protein-binding protein 1) (hSGT2)	PPFIBP1 KIAA1230																									Reverse	Class I	dLGQsNSDLDMPFAk	1	N-Term(Dimethyl); S5(Phospho); K15(Dimethyl)	87	ETD	13	0	1773.78	3	591.93	-0.24	140.85	10295
VSTTTDSPVpSPAQAASPFIPLDELSSK	1	S(2): 0.0; T(3): 0.0; T(4): 0.0; T(5): 0.0; S(7): 0.0; S(10): 100.0; S(16): 0.0; S(25): 0.0; S(26): 0.0	364	Q96E09	Protein FAM122A OS=Homo sapiens GN=FAM122A PE=1 SV=1 - [F122A_HUMAN]	1	Q96E09	S270	Protein FAM122A	FAM122A C9orf42																									Reverse	Class I	vSTTTDSPVsPAQAASPFIPLDELSSk	1	N-Term(Dimethyl); S10(Phospho); K27(Dimethyl)	62	HCD	13	0	2881.41	3	961.142	-0.65	147.29	10787
GLSApSLPDLDSENWIEVK	1	S(3): 0.0; S(5): 100.0; S(11): 0.0	364	Q6PKG0	La-related protein 1 OS=Homo sapiens GN=LARP1 PE=1 SV=2 - [LARP1_HUMAN]	1	Q6PKG0	S548	La-related protein 1 (La ribonucleoprotein domain family member 1)	LARP1 KIAA0731 LARP																									Reverse	Class I	gLSAsLPDLDSENWIEVk	1	N-Term(Dimethyl); S5(Phospho); K18(Dimethyl)	105	ETD	13	0	2109.02	3	703.677	0.31	147.92	10832
RVTNDIpSPESpSPGVGR	2	T(3): 0.0; S(7): 100.0; S(10): 0.0; S(11): 100.0	364	Q15154	Pericentriolar material 1 protein OS=Homo sapiens GN=PCM1 PE=1 SV=2 - [PCM1_HUMAN]	1	Q15154	S65, S69	Pericentriolar material 1 protein (PCM-1) (hPCM-1)	PCM1																									Reverse	Class I	rVTNDIsPESsPGVGR	1	N-Term(Dimethyl); S7(Phospho); S11(Phospho)	83	ETD	21-24	1	1858.81	3	620.276	1.34	45.77	3156
RRAPpSVANVGSHCDLSLK	1	S(5): 100.0; S(11): 0.0; S(16): 0.0	364	P21333	Filamin-A OS=Homo sapiens GN=FLNA PE=1 SV=4 - [FLNA_HUMAN]	1	P21333	S2152	Filamin-A (FLN-A) (Actin-binding protein 280) (ABP-280) (Alpha-filamin) (Endothelial actin-binding protein) (Filamin-1) (Non-muscle filamin)	FLNA FLN FLN1																									Reverse	Class I	rRAPsVANVGSHcDLSLk	1	N-Term(Dimethyl); S5(Phospho); C13(Carbamidomethyl); K18(Dimethyl)	119	ETD	38	2	2103.05	3	701.69	0.74	51.98	3358
LQLHEpSQKDYK	1	S(6): 100.0; Y(10): 0.0	364	Q14247	Src substrate cortactin OS=Homo sapiens GN=CTTN PE=1 SV=1 - [SRC8_HUMAN]	1	Q14247	S261	Src substrate cortactin (Amplaxin) (Oncogene EMS1)	CTTN EMS1																									Reverse	Class I	lQLHEsQkDYk	1	N-Term(Dimethyl); S6(Phospho); K8(Dimethyl); K11(Dimethyl)	83	ETD	32	1	1552.78	3	518.265	2.05	54.02	3547
RLpSSTSLASGHSVR	1	S(3): 100.0; S(4): 0.0; T(5): 0.0; S(6): 0.0; S(9): 0.0; S(12): 0.0	364	Q9BZL6	Serine/threonine-protein kinase D2 OS=Homo sapiens GN=PRKD2 PE=1 SV=1 - [KPCD2_HUMAN]	1	Q9BZL6	S197	Serine/threonine-protein kinase D2 (EC 2.7.11.13) (nPKC-D2)	PRKD2 PKD2 HSPC187																									Reverse	Class I	rLsSTSLASGHSVR	1	N-Term(Dimethyl); S3(Phospho)	84	ETD	33	1	1565.78	3	522.597	-2.28	56.98	3664
DYDEEEQGYDpSEKEK	1	Y(2): 0.0; Y(9): 0.0; S(11): 100.0	364	Q05519	Splicing factor arginine/serine-rich 11 OS=Homo sapiens GN=SFRS11 PE=1 SV=1 - [SFR11_HUMAN]	1	Q05519	S434	Serine/arginine-rich splicing factor 11 (Arginine-rich 54 kDa nuclear protein) (p54) (Splicing factor, arginine/serine-rich 11)	SRSF11 SFRS11																									Reverse	Class I	dYDEEEQGYDsEkEk	1	N-Term(Dimethyl); S11(Phospho); K13(Dimethyl); K15(Dimethyl)	99	ETD	26	1	2027.8	3	676.606	0.72	53.5	3959
SQpSPAASDCSSSSSSASLPSSGR	1	S(1): 0.2; S(3): 99.8; S(7): 0.0; S(10): 0.0; S(11): 0.0; S(12): 0.0; S(13): 0.0; S(14): 0.0; S(15): 0.0; S(17): 0.0; S(20): 0.0; S(21): 0.0	364	O95817	BAG family molecular chaperone regulator 3 OS=Homo sapiens GN=BAG3 PE=1 SV=3 - [BAG3_HUMAN]	1	O95817	S173	BAG family molecular chaperone regulator 3 (BAG-3) (Bcl-2-associated athanogene 3) (Bcl-2-binding protein Bis) (Docking protein CAIR-1)	BAG3 BIS																									Reverse	Class I	sQsPAASDcSSSSSSASLPSSGR	1	N-Term(Dimethyl:2H(4)); S3(Phospho); C9(Carbamidomethyl)	132	HCD	13	0	2311.96	2	1156.49	-0.75	53.42	4182
LRNKpSNEDQSMGNWQIK	1	S(5): 100.0; S(10): 0.0	364	P02545	Lamin-A/C OS=Homo sapiens GN=LMNA PE=1 SV=1 - [LMNA_HUMAN]	1	P02545	S458	Prelamin-A/C [Cleaved into: Lamin-A/C (70 kDa lamin) (Renal carcinoma antigen NY-REN-32)]	LMNA LMN1																									Reverse	Class I	lRNksNEDQSmGNWQIk	1	N-Term(Dimethyl); K4(Dimethyl); S5(Phospho); M11(Oxidation); K17(Dimethyl)	67	ETD	33	2	2228.05	3	743.356	-0.04	72.97	4555
LELQGPRGpSPNAR	1	S(9): 100.0	364	P19338	Nucleolin OS=Homo sapiens GN=NCL PE=1 SV=3 - [NUCL_HUMAN]	1	P19338	S563	Nucleolin (Protein C23)	NCL																									Reverse	Class I	lELQGPRGsPNAR	1	N-Term(Dimethyl); S9(Phospho)	70	ETD	29	1	1502.75	3	501.587	-1.24	68.37	4799
VLSSTpSEEDEPGVVK	1	S(3): 0.0; S(4): 0.0; T(5): 0.0; S(6): 100.0	364	Q8NI08	Nuclear receptor coactivator 7 OS=Homo sapiens GN=NCOA7 PE=1 SV=2 - [NCOA7_HUMAN]	1	Q8NI08	S211	Nuclear receptor coactivator 7 (140 kDa estrogen receptor-associated protein) (Estrogen nuclear receptor coactivator 1)	NCOA7 ERAP140 ESNA1 Nbla00052 Nbla10993																									Reverse	Class I	vLSSTsEEDEPGVVk	1	N-Term(Dimethyl:2H(4)); S6(Phospho); K15(Dimethyl:2H(4))	92	ETD	13	0	1719.85	3	573.956	0.39	74.59	5484
KLpSSSDAPAQDTGSSAAAVETDASR	1	S(3): 98.5; S(4): 0.8; S(5): 0.8; T(12): 0.0; S(14): 0.0; S(15): 0.0; T(21): 0.0; S(24): 0.0	364	Q7Z4S6	Kinesin-like protein KIF21A OS=Homo sapiens GN=KIF21A PE=1 SV=2 - [KI21A_HUMAN]	1	Q7Z4S6	S853	Kinesin-like protein KIF21A (Kinesin-like protein KIF2) (Renal carcinoma antigen NY-REN-62)	KIF21A KIAA1708 KIF2																									Reverse	Class I	kLsSSDAPAQDTGSSAAAVETDASR	3	N-Term(Dimethyl:2H(4)); K1(Dimethyl:2H(4)); S3(Phospho)	83	HCD	27	1	2566.21	3	856.075	-0.91	78.96	6499
HSMGPGGYGDNLGGGQMYpSPR	1	S(2): 0.0; Y(8): 0.0; Y(18): 0.4; S(19): 99.6	364	P40425	Pre-B-cell leukemia transcription factor 2 OS=Homo sapiens GN=PBX2 PE=1 SV=2 - [PBX2_HUMAN]	1	P40425	S395	Pre-B-cell leukemia transcription factor 2 (Homeobox protein PBX2) (Protein G17)	PBX2 G17																									Reverse	Class I	hSmGPGGYGDNLGGGQmYsPR	1	N-Term(Dimethyl:2H(4)); M3(Oxidation); M17(Oxidation); S19(Phospho)	58	HCD	30	0	2281.95	3	761.321	7.2	82.51	6728
SLFFSpSKEDIHTSESESK	1	S(1): 0.0; S(5): 0.0; S(6): 100.0; T(12): 0.0; S(13): 0.0; S(15): 0.0; S(17): 0.0	364	Q52LW3	Rho GTPase-activating protein 29 OS=Homo sapiens GN=ARHGAP29 PE=1 SV=2 - [RHG29_HUMAN]	1	Q52LW3	S930	Rho GTPase-activating protein 29 (PTPL1-associated RhoGAP protein 1) (Rho-type GTPase-activating protein 29)	ARHGAP29 PARG1																									Reverse	Class I	sLFFSskEDIHTSESESk	1	N-Term(Dimethyl); S6(Phospho); K7(Dimethyl); K18(Dimethyl)	78	ETD	30	1	2222.03	3	741.347	0.11	117.62	7626
LSLVIRpSPSLLQSGAK	1	S(2): 0.0; S(7): 100.0; S(9): 0.0; S(13): 0.0	364	Q9BQG0	Myb-binding protein 1A OS=Homo sapiens GN=MYBBP1A PE=1 SV=2 - [MBB1A_HUMAN]	1	Q9BQG0	S1308	Myb-binding protein 1A	MYBBP1A P160																									Reverse	Class I	lSLVIRsPSLLQSGAk	1	N-Term(Dimethyl:2H(4)); S7(Phospho); K16(Dimethyl:2H(4))	88	ETD	28	1	1813.08	3	605.03	-2.01	137.82	8937
FIIGSVSEDNpSEDEISNLVK	1	S(5): 0.0; S(7): 0.0; S(11): 100.0; S(16): 0.0	363	Q13085	Acetyl-CoA carboxylase 1 OS=Homo sapiens GN=ACACA PE=1 SV=2 - [ACACA_HUMAN]	1	Q13085	S29	Acetyl-CoA carboxylase 1 (ACC1) (EC 6.4.1.2) (ACC-alpha) [Includes: Biotin carboxylase (EC 6.3.4.14)]	ACACA ACAC ACC1 ACCA																									Reverse	Class I	fIIGSVSEDNsEDEISNLVk	1	N-Term(Dimethyl); S11(Phospho); K20(Dimethyl)	81	HCD	13	0	2331.1	3	777.705	0.11	146.49	10726
YVASYLLAALGGNSpSPSAK	1	Y(1): 0.0; S(4): 0.0; Y(5): 0.0; S(14): 0.0; S(15): 99.9; S(17): 0.1	363	P05387	60S acidic ribosomal protein P2 OS=Homo sapiens GN=RPLP2 PE=1 SV=1 - [RLA2_HUMAN]	1	P05387	S17	60S acidic ribosomal protein P2 (Renal carcinoma antigen NY-REN-44)	RPLP2 D11S2243E RPP2																									Reverse	Class I	yVASYLLAALGGNSsPSAk	1	N-Term(Dimethyl:2H(4)); S15(Phospho); K19(Dimethyl:2H(4))	111	ETD	14	0	2013.06	3	671.691	1.76	149.53	11378
GRSDpSVDYGQTHYYHQR	1	S(3): 0.0; S(5): 100.0; Y(8): 0.0; T(11): 0.0; Y(13): 0.0; Y(14): 0.0	363	Q9UPU9	Sterile alpha motif domain-containing protein 4A OS=Homo sapiens GN=SAMD4A PE=1 SV=2 - [SAM4A_HUMAN]	1	Q9UPU9	S67	Protein Smaug homolog 1 (Smaug 1) (hSmaug1) (Sterile alpha motif domain-containing protein 4A) (SAM domain-containing protein 4A)	SAMD4A KIAA1053 SAMD4 SMAUG1																									Reverse	Class I	gRSDsVDYGQTHYYHQR	1	N-Term(Dimethyl); S5(Phospho)	81	ETD	40	1	2176.92	3	726.312	1.09	40.13	2700
RDVYLpSPRDDGYSTK	1	Y(4): 0.0; S(6): 100.0; Y(12): 0.0; S(13): 0.0; T(14): 0.0	363	P38159	Heterogeneous nuclear ribonucleoprotein G OS=Homo sapiens GN=RBMX PE=1 SV=3 - [HNRPG_HUMAN]	1	P38159	S208	RNA-binding motif protein, X chromosome (Glycoprotein p43) (Heterogeneous nuclear ribonucleoprotein G) (hnRNP G) [Cleaved into: RNA-binding motif protein, X chromosome, N-terminally processed]	RBMX HNRPG RBMXP1																									Reverse	Class I	rDVYLsPRDDGYSTk	1	N-Term(Dimethyl:2H(4)); S6(Phospho); K15(Dimethyl:2H(4))	52	ETD	32	2	1915.94	3	639.319	1.24	69.53	4403
pSPGALETPSAAGSQGNTASQGK	1	S(1): 100.0; T(7): 0.0; S(9): 0.0; S(13): 0.0; T(17): 0.0; S(19): 0.0	363	Q9Y2D5	A-kinase anchor protein 2 OS=Homo sapiens GN=AKAP2 PE=1 SV=2 - [AKAP2_HUMAN]	1	Q9Y2D5	S393	A-kinase anchor protein 2 (AKAP-2) (AKAP-KL) (Protein kinase A-anchoring protein 2) (PRKA2)	AKAP2 KIAA0920 PRKA2																									Reverse	Class I	sPGALETPSAAGSQGNTASQGk	1	N-Term(Dimethyl:2H(4)); S1(Phospho); K22(Dimethyl:2H(4))	151	HCD	13	0	2160.05	2	1080.53	2.01	63.31	4586
MESSFGpSPSKQESSESLPK	1	S(3): 0.0; S(4): 0.0; S(7): 99.8; S(9): 0.2; S(13): 0.0; S(14): 0.0; S(16): 0.0	363	Q6VMQ6	Activating transcription factor 7-interacting protein 1 OS=Homo sapiens GN=ATF7IP PE=1 SV=1 - [MCAF1_HUMAN]	1	Q6VMQ6	S477	Activating transcription factor 7-interacting protein 1 (ATF-interacting protein) (ATF-IP) (ATF7-interacting protein) (ATFa-associated modulator) (hAM) (MBD1-containing chromatin-associated factor 1) (P621)	ATF7IP MCAF MCAF1																									Reverse	Class I	mESSFGsPSkQESSESLPk	2	M1(Oxidation); N-Term(Dimethyl:2H(4)); S7(Phospho); K10(Dimethyl:2H(4)); K19(Dimethyl:2H(4))	75	ETD	27	1	2234.07	3	745.361	0.02	72.65	4967
NSATFKpSFEDR	1	S(2): 0.0; T(4): 0.0; S(7): 100.0	363	O43399	Tumor protein D54 OS=Homo sapiens GN=TPD52L2 PE=1 SV=2 - [TPD54_HUMAN]	1	O43399	S166	Tumor protein D54 (hD54) (Tumor protein D52-like 2)	TPD52L2																									Reverse	Class I	nSATFksFEDR	1	N-Term(Dimethyl:2H(4)); K6(Dimethyl:2H(4)); S7(Phospho)	81	ETD	29	1	1445.69	3	482.568	-0.82	81.12	5593
ESGGSGFRpSPHLWK	1	S(2): 0.0; S(5): 0.0; S(9): 100.0	363	P00519	Proto-oncogene tyrosine-protein kinase ABL1 OS=Homo sapiens GN=ABL1 PE=1 SV=4 - [ABL1_HUMAN]	1	P00519	S683	Tyrosine-protein kinase ABL1 (EC 2.7.10.2) (Abelson murine leukemia viral oncogene homolog 1) (Abelson tyrosine-protein kinase 1) (Proto-oncogene c-Abl) (p150)	ABL1 ABL JTK7																									Reverse	Class I	eSGGSGFRsPHLWk	1	N-Term(Dimethyl); S9(Phospho); K14(Dimethyl)	72	ETD	33	1	1680.79	3	560.935	1.24	99.62	5978
QLEDGRTLpSDYNIQK	1	T(7): 0.0; S(9): 100.0; Y(11): 0.0	363	P62988	Ubiquitin OS=Homo sapiens GN=RPS27A PE=1 SV=1 - [UBIQ_HUMAN]	1	P62988	S57	Replaced by: P62987;P62979;P0CG47;P0CG48 = Ubiquitin-60S ribosomal protein L40 (CEP52) (Ubiquitin A-52 residue ribosomal protein fusion product 1) [Cleaved into: Ubiquitin; 60S ribosomal protein L40] | Ubiquitin-40S ribosomal protein S27a (Ubiquitin carboxyl extension protein 80) [Cleaved into: Ubiquitin; 40S ribosomal protein S27a] | Polyubiquitin-B [Cleaved into: Ubiquitin] | Polyubiquitin-C [C…	UBA52 UBCEP2 | RPS27A UBA80 UBCEP1 | UBB | UBC																									Reverse	Class I	qLEDGRTLsDYNIQk	1	N-Term(Dimethyl:2H(4)); S9(Phospho); K15(Dimethyl:2H(4))	61	ETD	28	1	1923.96	3	641.993	-1.51	98.73	6668
IRLFpSADPFDLEAQAK	1	S(5): 100.0	363	Q5TDH0	Protein DDI1 homolog 2 OS=Homo sapiens GN=DDI2 PE=1 SV=1 - [DDI2_HUMAN]	1	Q5TDH0	S194	Protein DDI1 homolog 2	DDI2																									Reverse	Class I	iRLFsADPFDLEAQAk	1	N-Term(Dimethyl); S5(Phospho); K16(Dimethyl)	68	ETD	28	1	1956.99	3	653	1.45	147.2	9353
YESQEPLAGQEpSPLPLATR	1	Y(1): 0.0; S(3): 0.0; S(12): 100.0; T(18): 0.0	363	Q9C0C2	182 kDa tankyrase 1-binding protein OS=Homo sapiens GN=TNKS1BP1 PE=1 SV=3 - [TB182_HUMAN]	1	Q9C0C2	S601	182 kDa tankyrase-1-binding protein	TNKS1BP1 KIAA1741 TAB182																									Reverse	Class I	yESQEPLAGQEsPLPLATR	1	N-Term(Dimethyl:2H(4)); S12(Phospho)	96	ETD	14	0	2198.07	3	733.36	-1.08	125.46	9461
ISMQDVDLSLGpSPK	1	S(2): 0.0; S(9): 0.0; S(12): 100.0	362	Q09666	Neuroblast differentiation-associated protein AHNAK OS=Homo sapiens GN=AHNAK PE=1 SV=2 - [AHNK_HUMAN]	1	Q09666	S511	Neuroblast differentiation-associated protein AHNAK (Desmoyokin)	AHNAK PM227																									Reverse	Class I	iSMQDVDLSLGsPk	1	N-Term(Dimethyl:2H(4)); S12(Phospho); K14(Dimethyl:2H(4))	81	ETD	14	0	1633.84	3	545.284	1.05	140.59	10655
HQDGLPYIDDpSPSSSPHLSSK	1	Y(7): 0.0; S(11): 100.0; S(13): 0.0; S(14): 0.0; S(15): 0.0; S(19): 0.0; S(20): 0.0	362	P11274	Breakpoint cluster region protein OS=Homo sapiens GN=BCR PE=1 SV=2 - [BCR_HUMAN]	1	P11274	S459	Breakpoint cluster region protein (EC 2.7.11.1) (Renal carcinoma antigen NY-REN-26)	BCR BCR1 D22S11																									Reverse	Class I	hQDGLPYIDDsPSSSPHLSSk	1	N-Term(Dimethyl); S11(Phospho); K21(Dimethyl)	89	HCD	31	0	2403.09	2	1202.05	-0.41	132.54	11014
ACpSVEELYAIPPDADVAK	1	S(3): 100.0; Y(8): 0.0	362	Q9H792	Tyrosine-protein kinase SgK269 OS=Homo sapiens GN=SGK269 PE=1 SV=3 - [SG269_HUMAN]	1	Q9H792	S792	Pseudopodium-enriched atypical kinase 1 (EC 2.7.10.2) (Sugen kinase 269) (Tyrosine-protein kinase SgK269)	PEAK1 KIAA2002																									Reverse	Class I	acsVEELYAIPPDADVAk	1	N-Term(Dimethyl:2H(4)); C2(Carbamidomethyl); S3(Phospho); K18(Dimethyl:2H(4))	57	HCD	13	0	2092.02	2	1046.51	-0.19	140.61	11360
APLKDEQEMRApSPK	1	S(12): 100.0	362	O75592	Probable E3 ubiquitin-protein ligase MYCBP2 OS=Homo sapiens GN=MYCBP2 PE=1 SV=3 - [MYCB2_HUMAN]	1	O75592	S2947	Probable E3 ubiquitin-protein ligase MYCBP2 (EC 6.3.2.-) (Myc-binding protein 2) (Pam/highwire/rpm-1 protein) (Protein associated with Myc)	MYCBP2 KIAA0916 PAM																									Reverse	Class I	aPLkDEQEmRAsPk	1	N-Term(Dimethyl:2H(4)); K4(Dimethyl:2H(4)); M9(Oxidation); S12(Phospho); K14(Dimethyl:2H(4))	84	ETD	32	2	1791.94	3	597.986	-1.96	27.47	2053
LTEERDGpSLNQSSGYR	1	T(2): 0.0; S(8): 100.0; S(12): 0.0; S(13): 0.0; Y(15): 0.0	362	P06241	Proto-oncogene tyrosine-protein kinase Fyn OS=Homo sapiens GN=FYN PE=1 SV=3 - [FYN_HUMAN]	1	P06241	S21	Tyrosine-protein kinase Fyn (EC 2.7.10.2) (Proto-oncogene Syn) (Proto-oncogene c-Fyn) (Src-like kinase) (SLK) (p59-Fyn)	FYN																									Reverse	Class I	lTEERDGsLNQSSGYR	1	N-Term(Dimethyl); S8(Phospho)	75	ETD	29	1	1919.84	3	640.62	-2.62	50.37	3255
VNVPEESRNGETpSPR	1	S(7): 0.0; T(12): 0.0; S(13): 100.0	362	Q9UEY8	Gamma-adducin OS=Homo sapiens GN=ADD3 PE=1 SV=1 - [ADDG_HUMAN]	1	Q9UEY8	S461	Gamma-adducin (Adducin-like protein 70)	ADD3 ADDL																									Reverse	Class I	vNVPEESRNGETsPR	1	N-Term(Dimethyl); S13(Phospho)	65	ETD	29	1	1778.8	3	593.606	-1.33	48.48	3467
LNHVAAGLVpSPSLK	1	S(10): 100.0; S(12): 0.0	362	Q05519	Splicing factor arginine/serine-rich 11 OS=Homo sapiens GN=SFRS11 PE=1 SV=1 - [SFR11_HUMAN]	1	Q05519	S207	Serine/arginine-rich splicing factor 11 (Arginine-rich 54 kDa nuclear protein) (p54) (Splicing factor, arginine/serine-rich 11)	SRSF11 SFRS11																									Reverse	Class I	lNHVAAGLVsPSLk	1	N-Term(Dimethyl); S10(Phospho); K14(Dimethyl)	85	ETD	29	0	1541.84	3	514.62	-0.31	99.07	6687
RQSSIFGGADVGFSGGIPpSPDK	1	S(3): 0.0; S(4): 0.0; S(14): 0.0; S(19): 100.0	361	Q9P2Y5	UV radiation resistance-associated gene protein OS=Homo sapiens GN=UVRAG PE=1 SV=1 - [UVRAG_HUMAN]	1	Q9P2Y5	S498	UV radiation resistance-associated gene protein (p63)	UVRAG																									Reverse	Class I	rQSSIFGGADVGFSGGIPsPDk	1	N-Term(Dimethyl); S19(Phospho); K22(Dimethyl)	58	HCD	30	1	2315.13	3	772.382	11.03	146.59	12225
SATDGNTSTpTPPTSAKK	1	S(1): 0.0; T(3): 0.0; T(7): 0.0; S(8): 0.0; T(9): 0.0; T(10): 100.0; T(13): 0.0; S(14): 0.0	361	Q13620	Cullin-4B OS=Homo sapiens GN=CUL4B PE=1 SV=3 - [CUL4B_HUMAN]	1	Q13620	T31	Cullin-4B (CUL-4B)	CUL4B KIAA0695																									Reverse	Class I	sATDGNTSTtPPTSAkk	1	N-Term(Dimethyl:2H(4)); T10(Phospho); K16(Dimethyl:2H(4)); K17(Dimethyl:2H(4))	86	ETD	28	1	1839.95	3	613.987	-1.56	28.51	2171
IDENpSDKEMEVEESPEK	1	S(5): 100.0; S(14): 0.0	361	Q8N3X1	Formin-binding protein 4 OS=Homo sapiens GN=FNBP4 PE=1 SV=2 - [FNBP4_HUMAN]	1	Q8N3X1	S499	Formin-binding protein 4 (Formin-binding protein 30)	FNBP4 FBP30 KIAA1014																									Reverse	Class I	iDENsDkEmEVEESPEk	1	N-Term(Dimethyl); S5(Phospho); K7(Dimethyl); M9(Oxidation); K17(Dimethyl)	62	ETD	27	1	2187.93	3	729.98	0.6	51.41	3539
RTpSSTLDSEGTFNSYRK	1	T(2): 0.0; S(3): 100.0; S(4): 0.0; T(5): 0.0; S(8): 0.0; T(11): 0.0; S(14): 0.0; Y(15): 0.0	361	Q92609	TBC1 domain family member 5 OS=Homo sapiens GN=TBC1D5 PE=1 SV=1 - [TBCD5_HUMAN]	1	Q92609	S43	TBC1 domain family member 5	TBC1D5 KIAA0210																									Reverse	Class I	rTsSTLDSEGTFNSYRk	1	N-Term(Dimethyl:2H(4)); S3(Phospho); K17(Dimethyl:2H(4))	97	ETD	32	2	2093.01	3	698.342	-1.26	71.66	4527
HLSPpYATLTVGDSSHK	1	S(3): 0.0; Y(5): 100.0; T(7): 0.0; T(9): 0.0; S(13): 0.0; S(14): 0.0	361	Q9BSJ8	Extended-synaptotagmin-1 OS=Homo sapiens GN=FAM62A PE=1 SV=1 - [ESYT1_HUMAN]	1	Q9BSJ8	Y822	Extended synaptotagmin-1 (E-Syt1) (Membrane-bound C2 domain-containing protein)	ESYT1 FAM62A KIAA0747 MBC2																									Reverse	Class I	hLSPyATLTVGDSSHk	1	N-Term(Dimethyl); Y5(Phospho); K16(Dimethyl)	58	ETD	31	0	1848.88	3	616.966	-3.01	91.08	5210
QKFNDpSEGDDTEETEDYR	1	S(6): 100.0; T(11): 0.0; T(14): 0.0; Y(17): 0.0	361	Q9NYF8	Bcl-2-associated transcription factor 1 OS=Homo sapiens GN=BCLAF1 PE=1 SV=2 - [BCLF1_HUMAN]	1	Q9NYF8	S397	Bcl-2-associated transcription factor 1 (Btf)	BCLAF1 BTF KIAA0164																									Reverse	Class I	qkFNDsEGDDTEETEDYR	1	N-Term(Dimethyl); K2(Dimethyl); S6(Phospho)	90	HCD	28	1	2313.93	2	1157.47	10.11	68.39	5391
KQSFDDNDpSEELEDKDSK	1	S(3): 0.0; S(9): 100.0; S(17): 0.0	361	O60841	Eukaryotic translation initiation factor 5B OS=Homo sapiens GN=EIF5B PE=1 SV=3 - [IF2P_HUMAN]	1	O60841	S113	Eukaryotic translation initiation factor 5B (eIF-5B) (Translation initiation factor IF-2)	EIF5B IF2 KIAA0741																									Reverse	Class I	kQSFDDNDsEELEDkDSk	1	K1(Dimethyl:2H(4)); N-Term(Dimethyl:2H(4)); S9(Phospho); K15(Dimethyl:2H(4)); K18(Dimethyl:2H(4))	53	HCD	31	2	2337.11	2	1169.06	0.57	67.45	5718
RSpSDSWEVWGSASTNR	1	S(2): 0.0; S(3): 100.0; S(5): 0.0; S(11): 0.0; S(13): 0.0; T(14): 0.0	361	Q8N6T3	ADP-ribosylation factor GTPase-activating protein 1 OS=Homo sapiens GN=ARFGAP1 PE=1 SV=2 - [ARFG1_HUMAN]	1	Q8N6T3	S361	ADP-ribosylation factor GTPase-activating protein 1 (ARF GAP 1) (ADP-ribosylation factor 1 GTPase-activating protein) (ARF1 GAP) (ARF1-directed GTPase-activating protein)	ARFGAP1 ARF1GAP																									Reverse	Class I	rSsDSWEVWGSASTNR	1	N-Term(Dimethyl); S3(Phospho)	92	ETD	29	1	1932.82	3	644.946	0.52	118.75	6919
NVALLSQLYHpSPARR	1	S(6): 0.0; Y(9): 0.0; S(11): 100.0	361	Q15717	ELAV-like protein 1 OS=Homo sapiens GN=ELAVL1 PE=1 SV=2 - [ELAV1_HUMAN]	1	Q15717	S202	ELAV-like protein 1 (Hu-antigen R) (HuR)	ELAVL1 HUR																									Reverse	Class I	nVALLSQLYHsPARR	1	N-Term(Dimethyl); S11(Phospho)	93	ETD	32	1	1832.95	3	611.656	-0.13	128.36	7406
TpSMGGTQQQFVEGVR	1	T(1): 0.1; S(2): 99.9; T(6): 0.0	361	P35222	Catenin beta-1 OS=Homo sapiens GN=CTNNB1 PE=1 SV=1 - [CTNB1_HUMAN]	1	P35222	S552	Catenin beta-1 (Beta-catenin)	CTNNB1 CTNNB OK/SW-cl.35 PRO2286																									Reverse	Class I	tsMGGTQQQFVEGVR	1	N-Term(Dimethyl); S2(Phospho)	83	ETD	13	0	1732.77	3	578.263	0.28	109.09	8033
ESSPLYpSPTFSDSTSAVK	1	S(2): 0.0; S(3): 0.0; Y(6): 0.0; S(7): 100.0; T(9): 0.0; S(11): 0.0; S(13): 0.0; T(14): 0.0; S(15): 0.0	361	P46821	Microtubule-associated protein 1B OS=Homo sapiens GN=MAP1B PE=1 SV=1 - [MAP1B_HUMAN]	1	P46821	S1797	Microtubule-associated protein 1B (MAP-1B) [Cleaved into: MAP1 light chain LC1]	MAP1B																									Reverse	Class I	eSSPLYsPTFSDSTSAVk	1	N-Term(Dimethyl); S7(Phospho); K18(Dimethyl)	69	ETD	14	0	2038.93	3	680.315	1.87	123.24	9307
DELHIVEAEAMNYEGpSPIK	1	Y(13): 0.0; S(16): 100.0	361	P06748	Nucleophosmin OS=Homo sapiens GN=NPM1 PE=1 SV=2 - [NPM_HUMAN]	1	P06748	S70	Nucleophosmin (NPM) (Nucleolar phosphoprotein B23) (Nucleolar protein NO38) (Numatrin)	NPM1 NPM																									Reverse	Class I	dELHIVEAEAmNYEGsPIk	1	N-Term(Dimethyl:2H(4)); M11(Oxidation); S16(Phospho); K19(Dimethyl:2H(4))	56	HCD	26	0	2305.09	3	769.035	0.35	138.37	9630
AQpTLPTSVVTITSESSPGK	1	T(3): 100.0; T(6): 0.0; S(7): 0.0; T(10): 0.0; T(12): 0.0; S(13): 0.0; S(15): 0.0; S(16): 0.0	360	Q01082	Spectrin beta chain, brain 1 OS=Homo sapiens GN=SPTBN1 PE=1 SV=2 - [SPTB2_HUMAN]	1	Q01082	T2328	Spectrin beta chain, brain 1 (Beta-II spectrin) (Fodrin beta chain) (Spectrin, non-erythroid beta chain 1)	SPTBN1 SPTB2																									Reverse	Class I	aQtLPTSVVTITSESSPGk	1	N-Term(Dimethyl); T3(Phospho); K19(Dimethyl)	110	HCD	14	0	2039.03	2	1020.02	1.77	134.96	11280
RVTQHEpSDNENEIQIQNK	1	T(3): 0.0; S(7): 100.0	360	Q5VZL5	Zinc finger MYM-type protein 4 OS=Homo sapiens GN=ZMYM4 PE=1 SV=1 - [ZMYM4_HUMAN]	1	Q5VZL5	S122	Zinc finger MYM-type protein 4 (Zinc finger protein 262)	ZMYM4 KIAA0425 ZNF262																									Reverse	Class I	rVTQHEsDNENEIQIQNk	1	N-Term(Dimethyl:2H(4)); S7(Phospho); K18(Dimethyl:2H(4))	59	HCD	33	1	2326.13	3	776.048	0.55	53.67	3513
GILHTDSQSQpSLR	1	T(5): 0.0; S(7): 0.0; S(9): 0.0; S(11): 100.0	360	Q15678	Tyrosine-protein phosphatase non-receptor type 14 OS=Homo sapiens GN=PTPN14 PE=1 SV=1 - [PTN14_HUMAN]	1	Q15678	S465	Tyrosine-protein phosphatase non-receptor type 14 (EC 3.1.3.48) (Protein-tyrosine phosphatase pez)	PTPN14 PEZ																									Reverse	Class I	gILHTDSQSQsLR	1	N-Term(Dimethyl); S11(Phospho)	79	ETD	29	0	1549.74	3	517.251	1.68	57.39	3648
SRpSDIDVNAAASAK	1	S(1): 0.0; S(3): 100.0; S(12): 0.0	360	Q7Z460	CLIP-associating protein 1 OS=Homo sapiens GN=CLASP1 PE=1 SV=1 - [CLAP1_HUMAN]	1	Q7Z460	S600	CLIP-associating protein 1 (Cytoplasmic linker-associated protein 1) (Multiple asters homolog 1) (Protein Orbit homolog 1) (hOrbit1)	CLASP1 KIAA0622 MAST1																									Reverse	Class I	sRsDIDVNAAASAk	1	N-Term(Dimethyl); S3(Phospho); K14(Dimethyl)	97	ETD	28	1	1540.73	3	514.249	-2.04	52.6	3769
DASSpSPASTASSASSTSLK	1	S(3): 0.0; S(4): 0.0; S(5): 100.0; S(8): 0.0; T(9): 0.0; S(11): 0.0; S(12): 0.0; S(14): 0.0; S(15): 0.0; T(16): 0.0; S(17): 0.0	360	Q04724	Transducin-like enhancer protein 1 OS=Homo sapiens GN=TLE1 PE=1 SV=2 - [TLE1_HUMAN]	1	Q04724	S286	Transducin-like enhancer protein 1 (E(Sp1) homolog) (Enhancer of split groucho-like protein 1) (ESG1)	TLE1																									Reverse	Class I	dASSsPASTASSASSTSLk	1	N-Term(Dimethyl); S5(Phospho); K19(Dimethyl)	74	ETD	13	0	1877.84	3	626.618	0.83	59.24	4271
KGDDpSDEEDLCISNK	1	S(5): 100.0; S(13): 0.0	360	Q9Y3M8	StAR-related lipid transfer protein 13 OS=Homo sapiens GN=STARD13 PE=1 SV=2 - [STA13_HUMAN]	1	Q9Y3M8	S133	StAR-related lipid transfer protein 13 (46H23.2) (Deleted in liver cancer 2 protein) (DLC-2) (Rho GTPase-activating protein) (START domain-containing protein 13) (StARD13)	STARD13 DLC2 GT650																									Reverse	Class I	kGDDsDEEDLcISNk	1	N-Term(Dimethyl:2H(4)); K1(Dimethyl:2H(4)); S5(Phospho); C11(Carbamidomethyl); K15(Dimethyl:2H(4))	81	ETD	28	1	1900.86	3	634.292	-0.56	65.76	4629
TGpSNIpSGASSDISLDEQYK	2	T(1): 0.0; S(3): 100.0; S(6): 100.0; S(9): 0.0; S(10): 0.0; S(13): 0.0; Y(18): 0.0	360	P22059	Oxysterol-binding protein 1 OS=Homo sapiens GN=OSBP PE=1 SV=1 - [OSBP1_HUMAN]	1	P22059	S379, S382	Oxysterol-binding protein 1	OSBP OSBP1																									Reverse	Class I	tGsNIsGASSDISLDEQYk	1	N-Term(Dimethyl:2H(4)); S3(Phospho); S6(Phospho); K19(Dimethyl:2H(4))	87	ETD	7	0	2195.96	3	732.66	2.07	73.79	5117
TAEISSTALRSpSPIMR	1	T(1): 0.0; S(5): 0.0; S(6): 0.0; T(7): 0.0; S(11): 0.0; S(12): 100.0	360	O43314	Inositol hexakisphosphate and diphosphoinositol-pentakisphosphate kinase 2 OS=Homo sapiens GN=HISPPD1 PE=1 SV=3 - [VIP2_HUMAN]	1	O43314	S1172	Inositol hexakisphosphate and diphosphoinositol-pentakisphosphate kinase 2 (EC 2.7.4.21) (EC 2.7.4.24) (Diphosphoinositol pentakisphosphate kinase 2) (Histidine acid phosphatase domain-containing protein 1) (InsP6 and PP-IP5 kinase 2) (VIP1 homolog 2) (hsVIP2)	PPIP5K2 HISPPD1 KIAA0433 VIP2																									Reverse	Class I	tAEISSTALRSsPImR	1	N-Term(Dimethyl); S12(Phospho); M15(Oxidation)	97	ETD	28	1	1843.89	3	615.303	-2.39	81.99	5650
RTpSSTLDSEGTFNSYR	1	T(2): 0.0; S(3): 100.0; S(4): 0.0; T(5): 0.0; S(8): 0.0; T(11): 0.0; S(14): 0.0; Y(15): 0.0	360	Q92609	TBC1 domain family member 5 OS=Homo sapiens GN=TBC1D5 PE=1 SV=1 - [TBCD5_HUMAN]	1	Q92609	S43	TBC1 domain family member 5	TBC1D5 KIAA0210																									Reverse	Class I	rTsSTLDSEGTFNSYR	1	N-Term(Dimethyl); S3(Phospho)	75	ETD	29	1	1928.84	3	643.618	-0.27	85.93	5889
SApSQSSLDKLDQELK	1	S(1): 0.0; S(3): 100.0; S(5): 0.0; S(6): 0.0	360	O60271	C-jun-amino-terminal kinase-interacting protein 4 OS=Homo sapiens GN=SPAG9 PE=1 SV=4 - [JIP4_HUMAN]	1	O60271	S730	C-Jun-amino-terminal kinase-interacting protein 4 (JIP-4) (JNK-interacting protein 4) (Cancer/testis antigen 89) (CT89) (Human lung cancer oncogene 6 protein) (HLC-6) (JNK-associated leucine-zipper protein) (JLP) (Mitogen-activated protein kinase 8-interacting protein 4) (Proliferation-inducing protein 6) (Protein highly expressed in testis) (PHET) (Sperm surface protein) (Sperm-associated antige…	SPAG9 HSS KIAA0516 MAPK8IP4 SYD1 HLC6																									Reverse	Class I	sAsQSSLDkLDQELk	1	N-Term(Dimethyl); S3(Phospho); K9(Dimethyl); K15(Dimethyl)	75	ETD	27	1	1812.88	3	604.965	-10.56	117.62	7568
VFVGGLpSPDTSEEQIK	1	S(7): 100.0; T(10): 0.0; S(11): 0.0	360	O14979	Heterogeneous nuclear ribonucleoprotein D-like OS=Homo sapiens GN=HNRPDL PE=1 SV=3 - [HNRDL_HUMAN]	1	O14979	S241	Heterogeneous nuclear ribonucleoprotein D-like (hnRNP D-like) (hnRNP DL) (AU-rich element RNA-binding factor) (JKT41-binding protein) (Protein laAUF1)	HNRPDL JKTBP																									Reverse	Class I	vFVGGLsPDTSEEQIk	1	N-Term(Dimethyl); S7(Phospho); K16(Dimethyl)	72	ETD	14	0	1841.89	3	614.636	0.34	130.96	9858
KAEENAEGGESALGPDGEPIDESpSQMSDLPVK	1	S(11): 0.0; S(23): 1.0; S(24): 99.0; S(27): 0.0	359	P51531	Probable global transcription activator SNF2L2 OS=Homo sapiens GN=SMARCA2 PE=1 SV=1 - [SMCA2_HUMAN]	1	P51531	S584	Probable global transcription activator SNF2L2 (EC 3.6.4.-) (ATP-dependent helicase SMARCA2) (BRG1-associated factor 190B) (BAF190B) (Protein brahma homolog) (hBRM) (SNF2-alpha) (SWI/SNF-related matrix-associated actin-dependent regulator of chromatin subfamily A member 2)	SMARCA2 BAF190B BRM SNF2A SNF2L2																									Reverse	Class I	kAEENAEGGESALGPDGEPIDESsQmSDLPVk	1	N-Term(Dimethyl); K1(Dimethyl); S24(Phospho); M26(Oxidation); K32(Dimethyl)	69	HCD	28	1	3466.55	3	1156.19	1.39	119.28	10311
MSYLTAMGADYLpSCDSR	1	S(2): 0.0; Y(3): 0.0; T(5): 0.0; Y(11): 0.0; S(13): 100.0; S(16): 0.0	359	Q9UDY2	Tight junction protein ZO-2 OS=Homo sapiens GN=TJP2 PE=1 SV=1 - [ZO2_HUMAN]	1	Q9UDY2	S913	Tight junction protein ZO-2 (Tight junction protein 2) (Zona occludens protein 2) (Zonula occludens protein 2)	TJP2 X104 ZO2																									Reverse	Class I	mSYLTAMGADYLscDSR	1	N-Term(Dimethyl); S13(Phospho); C14(Carbamidomethyl)	88	ETD	14	0	2048.82	3	683.611	0.58	143.77	10920
AEDGpSVIDYELIDQDAR	1	S(5): 100.0; Y(9): 0.0	359	P07355	Annexin A2 OS=Homo sapiens GN=ANXA2 PE=1 SV=2 - [ANXA2_HUMAN]	1	P07355	S184	Annexin A2 (Annexin II) (Annexin-2) (Calpactin I heavy chain) (Calpactin-1 heavy chain) (Chromobindin-8) (Lipocortin II) (Placental anticoagulant protein IV) (PAP-IV) (Protein I) (p36)	ANXA2 ANX2 ANX2L4 CAL1H LPC2D																									Reverse	Class I	aEDGsVIDYELIDQDAR	1	N-Term(Dimethyl); S5(Phospho)	93	ETD	13	0	2016.88	3	672.965	0.51	141.06	11402
TSQVGAASAPAKEpSPRK	1	T(1): 0.0; S(2): 0.0; S(8): 0.0; S(14): 100.0	359	Q13428	Treacle protein OS=Homo sapiens GN=TCOF1 PE=1 SV=2 - [TCOF_HUMAN]	1	Q13428	S381	Treacle protein (Treacher Collins syndrome protein)	TCOF1																									Reverse	Class I	tSQVGAASAPAkEsPRk	1	N-Term(Dimethyl:2H(4)); K12(Dimethyl:2H(4)); S14(Phospho); K17(Dimethyl:2H(4))	81	ETD	31	2	1861.03	3	621.015	-1.91	28.69	2141
ASPDQNASTHpTPQSSVK	1	S(2): 0.0; S(8): 0.0; T(9): 0.0; T(11): 100.0; S(14): 0.0; S(15): 0.0	359	Q14677	Clathrin interactor 1 OS=Homo sapiens GN=CLINT1 PE=1 SV=1 - [EPN4_HUMAN]	1	Q14677	T308	Clathrin interactor 1 (Clathrin-interacting protein localized in the trans-Golgi region) (Clint) (Enthoprotin) (Epsin-4) (Epsin-related protein) (EpsinR)	CLINT1 ENTH EPN4 EPNR KIAA0171																									Reverse	Class I	aSPDQNASTHtPQSSVk	1	N-Term(Dimethyl:2H(4)); T11(Phospho); K17(Dimethyl:2H(4))	95	ETD	28	0	1898.9	3	633.639	-3.22	29.05	2183
SApSSGAEGDVSSEREP	1	S(1): 0.3; S(3): 99.5; S(4): 0.3; S(11): 0.0; S(12): 0.0	359	Q8TEA8	D-tyrosyl-tRNA(Tyr) deacylase 1 OS=Homo sapiens GN=DTD1 PE=1 SV=2 - [DTD1_HUMAN]	1	Q8TEA8	S196	D-tyrosyl-tRNA(Tyr) deacylase 1 (EC 3.1.-.-) (Histidyl-tRNA synthase-related)	DTD1 C20orf88 HARS2																									Reverse	Class I	sAsSGAEGDVSSEREP	2	N-Term(Dimethyl); S3(Phospho)	93	HCD	13	1	1672.67	2	836.838	-0.08	56.03	4392
IIGEDpSPSRLDR	1	S(6): 100.0; S(8): 0.0	359	Q9Y618	Nuclear receptor corepressor 2 OS=Homo sapiens GN=NCOR2 PE=1 SV=1 - [NCOR2_HUMAN]	1	Q9Y618	S1251	Nuclear receptor corepressor 2 (N-CoR2) (CTG repeat protein 26) (SMAP270) (Silencing mediator of retinoic acid and thyroid hormone receptor) (SMRT) (T3 receptor-associating factor) (TRAC) (Thyroid-, retinoic-acid-receptor-associated corepressor)	NCOR2 CTG26																									Reverse	Class I	iIGEDsPSRLDR	1	N-Term(Dimethyl); S6(Phospho)	62	ETD	28	1	1465.7	3	489.239	-1.21	62.64	4427
TpSPGRVDLPGSSTTLTK	1	T(1): 0.1; S(2): 99.9; S(11): 0.0; S(12): 0.0; T(13): 0.0; T(14): 0.0; T(16): 0.0	359	O94875	Sorbin and SH3 domain-containing protein 2 OS=Homo sapiens GN=SORBS2 PE=1 SV=3 - [SRBS2_HUMAN]	1	O94875	S278	Sorbin and SH3 domain-containing protein 2 (Arg/Abl-interacting protein 2) (ArgBP2) (Sorbin)	SORBS2 ARGBP2 KIAA0777																									Reverse	Class I	tsPGRVDLPGSSTTLTk	1	N-Term(Dimethyl); S2(Phospho); K17(Dimethyl)	85	ETD	27	1	1852.94	3	618.319	1.16	95.23	6473
APVPSTCSSTFPEELpSPPSHQAK	1	S(5): 0.0; T(6): 0.0; S(8): 0.0; S(9): 0.0; T(10): 0.0; S(16): 100.0; S(19): 0.0	359	Q14980	Nuclear mitotic apparatus protein 1 OS=Homo sapiens GN=NUMA1 PE=1 SV=2 - [NUMA1_HUMAN]	1	Q14980	S169	Nuclear mitotic apparatus protein 1 (NuMA protein) (SP-H antigen)	NUMA1 NUMA																									Reverse	Class I	aPVPSTcSSTFPEELsPPSHQAk	1	N-Term(Dimethyl); C7(Carbamidomethyl); S16(Phospho); K23(Dimethyl)	45	HCD	27	0	2590.15	3	864.056	-13.43	101.97	6633
QRGLHSELGEpSSLILK	1	S(6): 0.0; S(11): 100.0; S(12): 0.0	359	P37023	Serine/threonine-protein kinase receptor R3 OS=Homo sapiens GN=ACVRL1 PE=1 SV=2 - [ACVL1_HUMAN]	1	P37023	S160	Serine/threonine-protein kinase receptor R3 (SKR3) (EC 2.7.11.30) (Activin receptor-like kinase 1) (ALK-1) (TGF-B superfamily receptor type I) (TSR-I)	ACVRL1 ACVRLK1 ALK1																									Reverse	Class I	qRGLHSELGEsSLILk	1	N-Term(Dimethyl); S11(Phospho); K16(Dimethyl)	75	ETD	34	1	1903.01	3	635.007	0.92	112.43	7103
EDRGEYpSPGTALPSLR	1	Y(6): 0.0; S(7): 100.0; T(10): 0.0; S(14): 0.0	359	Q9BT81	Transcription factor SOX-7 OS=Homo sapiens GN=SOX7 PE=2 SV=1 - [SOX7_HUMAN]	1	Q9BT81	S166	Transcription factor SOX-7	SOX7																									Reverse	Class I	eDRGEYsPGTALPSLR	1	N-Term(Dimethyl); S7(Phospho)	78	ETD	28	1	1855.85	3	619.289	-3.45	113.14	7499
KKpSPNELVDDLFK	1	S(3): 100.0	359	Q9UNZ2	NSFL1 cofactor p47 OS=Homo sapiens GN=NSFL1C PE=1 SV=2 - [NSF1C_HUMAN]	1	Q9UNZ2	S114	NSFL1 cofactor p47 (UBX domain-containing protein 2C) (p97 cofactor p47)	NSFL1C UBXN2C																									Reverse	Class I	kksPNELVDDLFk	1	K1(Dimethyl:2H(4)); N-Term(Dimethyl:2H(4)); K2(Dimethyl:2H(4)); S3(Phospho); K13(Dimethyl:2H(4))	88	ETD	33	2	1741.02	3	581.013	0.2	138.99	8129
NVRpSDIpSDQEEDEESEGCPVSINLSK	2	S(4): 100.0; S(7): 100.0; S(15): 0.0; S(21): 0.0; S(25): 0.0	358	Q15154	Pericentriolar material 1 protein OS=Homo sapiens GN=PCM1 PE=1 SV=2 - [PCM1_HUMAN]	1	Q15154	S1764, S1767	Pericentriolar material 1 protein (PCM-1) (hPCM-1)	PCM1																									Reverse	Class I	nVRsDIsDQEEDEESEGcPVSINLSk	1	N-Term(Dimethyl:2H(4)); S4(Phospho); S7(Phospho); C18(Carbamidomethyl); K26(Dimethyl:2H(4))	55	HCD	14	1	3160.35	3	1054.12	0.65	129.98	10846
NFDFEGSLpSPVIAPK	1	S(7): 0.0; S(9): 100.0	358	Q9H1A4	Anaphase-promoting complex subunit 1 OS=Homo sapiens GN=ANAPC1 PE=1 SV=1 - [APC1_HUMAN]	1	Q9H1A4	S688	Anaphase-promoting complex subunit 1 (APC1) (Cyclosome subunit 1) (Mitotic checkpoint regulator) (Testis-specific gene 24 protein)	ANAPC1 TSG24																									Reverse	Class I	nFDFEGSLsPVIAPk	1	N-Term(Dimethyl:2H(4)); S9(Phospho); K15(Dimethyl:2H(4))	90	ETD	14	0	1764.91	3	588.975	2.67	145.04	11021
RKpSVPSETVVEDSR	1	S(3): 100.0; S(6): 0.0; T(8): 0.0; S(13): 0.0	358	P11137	Microtubule-associated protein 2 OS=Homo sapiens GN=MAP2 PE=1 SV=3 - [MAP2_HUMAN]	1	P11137	S833	Microtubule-associated protein 2 (MAP-2)	MAP2																									Reverse	Class I	rksVPSETVVEDSR	1	N-Term(Dimethyl); K2(Dimethyl); S3(Phospho)	75	ETD	33	2	1724.86	3	575.624	-0.03	49.65	3298
EAVREGpSPANWK	1	S(7): 100.0	358	O96019	Actin-like protein 6A OS=Homo sapiens GN=ACTL6A PE=1 SV=1 - [ACL6A_HUMAN]	1	O96019	S233	Actin-like protein 6A (53 kDa BRG1-associated factor A) (Actin-related protein Baf53a) (ArpNbeta) (BRG1-associated factor 53A) (BAF53A) (INO80 complex subunit K)	ACTL6A BAF53 BAF53A INO80K																									Reverse	Class I	eAVREGsPANWk	1	N-Term(Dimethyl:2H(4)); S7(Phospho); K12(Dimethyl:2H(4))	54	ETD	29	1	1487.75	3	496.588	0.57	59.09	3752
ENIKPNETpSPSFSK	1	T(8): 0.0; S(9): 100.0; S(11): 0.0; S(13): 0.0	358	Q99700	Ataxin-2 OS=Homo sapiens GN=ATXN2 PE=1 SV=1 - [ATX2_HUMAN]	1	Q99700	S771	Ataxin-2 (Spinocerebellar ataxia type 2 protein) (Trinucleotide repeat-containing gene 13 protein)	ATXN2 ATX2 SCA2 TNRC13																									Reverse	Class I	eNIkPNETsPSFSk	1	N-Term(Dimethyl); K4(Dimethyl); S9(Phospho); K14(Dimethyl)	68	ETD	28	0	1741.84	3	581.284	-1.97	64.82	4545
ESEDKPEIEDVGpSDEEEEK	1	S(2): 0.0; S(13): 100.0	358	P07900	Heat shock protein HSP 90-alpha OS=Homo sapiens GN=HSP90AA1 PE=1 SV=5 - [HS90A_HUMAN]	1	P07900	S263	Heat shock protein HSP 90-alpha (Heat shock 86 kDa) (HSP 86) (HSP86) (Renal carcinoma antigen NY-REN-38)	HSP90AA1 HSP90A HSPC1 HSPCA																									Reverse	Class I	eSEDkPEIEDVGsDEEEEk	1	N-Term(Dimethyl:2H(4)); K5(Dimethyl:2H(4)); S13(Phospho); K19(Dimethyl:2H(4))	38	HCD	27	0	2369.06	3	790.358	2.13	72.91	4982
KDGEMDRNFDpTLDLPK	1	T(11): 100.0	358	O00192	Armadillo repeat protein deleted in velo-cardio-facial syndrome OS=Homo sapiens GN=ARVCF PE=1 SV=1 - [ARVC_HUMAN]	1	O00192	T642	Armadillo repeat protein deleted in velo-cardio-facial syndrome	ARVCF																									Reverse	Class I	kDGEmDRNFDtLDLPk	1	N-Term(Dimethyl:2H(4)); K1(Dimethyl:2H(4)); M5(Oxidation); T11(Phospho); K16(Dimethyl:2H(4))	66	ETD	32	2	2086.03	3	696.015	-0.83	105.83	5983
SPpSDSSTASTPVAEQIER	1	S(1): 0.0; S(3): 100.0; S(5): 0.0; S(6): 0.0; T(7): 0.0; S(9): 0.0; T(10): 0.0	358	Q16643	Drebrin OS=Homo sapiens GN=DBN1 PE=1 SV=3 - [DREB_HUMAN]	1	Q16643	S339	Drebrin (Developmentally-regulated brain protein)	DBN1 D0S117E																									Reverse	Class I	sPsDSSTASTPVAEQIER	1	N-Term(Dimethyl:2H(4)); S3(Phospho)	109	HCD	13	0	1973.9	2	987.453	-0.56	91.46	7246
SVSTTNIAGHFNDEpSPLGLR	1	S(1): 0.0; S(3): 0.0; T(4): 0.0; T(5): 0.0; S(15): 100.0	358	Q92974	Rho guanine nucleotide exchange factor 2 OS=Homo sapiens GN=ARHGEF2 PE=1 SV=4 - [ARHG2_HUMAN]	1	Q92974	S163	Rho guanine nucleotide exchange factor 2 (Guanine nucleotide exchange factor H1) (GEF-H1) (Microtubule-regulated Rho-GEF) (Proliferating cell nucleolar antigen p40)	ARHGEF2 KIAA0651 LFP40																									Reverse	Class I	sVSTTNIAGHFNDEsPLGLR	1	N-Term(Dimethyl:2H(4)); S15(Phospho)	96	ETD	28	0	2227.07	3	743.027	-1.83	130.83	8504
SQSSHpSYDDSpTLPLIDR	2	S(1): 0.0; S(3): 0.0; S(4): 0.0; S(6): 100.0; Y(7): 0.0; S(10): 0.0; T(11): 100.0	358	O60716	Catenin delta-1 OS=Homo sapiens GN=CTNND1 PE=1 SV=1 - [CTND1_HUMAN]	1	O60716	S864, T869	Catenin delta-1 (Cadherin-associated Src substrate) (CAS) (p120 catenin) (p120(ctn)) (p120(cas))	CTNND1 KIAA0384																									Reverse	Class I	sQSSHsYDDStLPLIDR	1	N-Term(Dimethyl:2H(4)); S6(Phospho); T11(Phospho)	75	ETD	14	0	2112.88	3	704.965	-0.76	119.66	9054
RTFQQIQEEEDDDYPGSYpSPQDPSAGPLLTEELIK	1	T(2): 0.0; Y(14): 0.0; S(17): 1.0; Y(18): 1.0; S(19): 97.9; S(24): 0.0; T(30): 0.0	358	Q9NQG5	UPF0400 protein C20orf77 OS=Homo sapiens GN=C20orf77 PE=1 SV=1 - [CT077_HUMAN]	1	Q9NQG5	S166	Regulation of nuclear pre-mRNA domain-containing protein 1B (Cell cycle-related and expression-elevated protein in tumor)	RPRD1B C20orf77 CREPT																									Reverse	Class I	rTFQQIQEEEDDDYPGSYsPQDPSAGPLLTEELIk	1	N-Term(Dimethyl); S19(Phospho); K35(Dimethyl)	48	HCD	28	1	4131.9	3	1377.97	0.2	144.23	9347
VDpSTTCLFPVEEK	1	S(3): 100.0; T(4): 0.0; T(5): 0.0	358	Q06210	Glucosamine--fructose-6-phosphate aminotransferase [isomerizing] 1 OS=Homo sapiens GN=GFPT1 PE=1 SV=3 - [GFPT1_HUMAN]	1	Q06210	S261	Glucosamine--fructose-6-phosphate aminotransferase [isomerizing] 1 (EC 2.6.1.16) (D-fructose-6-phosphate amidotransferase 1) (Glutamine:fructose 6 phosphate amidotransferase 1) (GFAT 1) (GFAT1) (Hexosephosphate aminotransferase 1)	GFPT1 GFAT GFPT																									Reverse	Class I	vDsTTcLFPVEEk	1	N-Term(Dimethyl); S3(Phospho); C6(Carbamidomethyl); K13(Dimethyl)	66	ETD	13	0	1660.76	3	554.257	0.82	134.95	9826
RAEVLGHKpTPEPAPR	1	T(9): 100.0	357	Q9UHD8	Septin-9 OS=Homo sapiens GN=SEPT9 PE=1 SV=2 - [SEPT9_HUMAN]	1	Q9UHD8	T142	Septin-9 (MLL septin-like fusion protein MSF-A) (MLL septin-like fusion protein) (Ovarian/Breast septin) (Ov/Br septin) (Septin D1)	SEPT9 KIAA0991 MSF																									Reverse	Class I	rAEVLGHktPEPAPR	1	N-Term(Dimethyl:2H(4)); K8(Dimethyl:2H(4)); T9(Phospho)	67	ETD	38	2	1801.99	3	601.336	0.63	33.22	2334
VQEKPDpSPGGSTQIQR	1	S(7): 100.0; S(11): 0.0; T(12): 0.0	357	Q13459	Myosin-IXb OS=Homo sapiens GN=MYO9B PE=1 SV=2 - [MYO9B_HUMAN]	1	Q13459	S1290	Unconventional myosin-IXb (Unconventional myosin-9b)	MYO9B MYR5																									Reverse	Class I	vQEkPDsPGGSTQIQR	1	N-Term(Dimethyl); K4(Dimethyl); S7(Phospho)	80	ETD	28	0	1862.9	3	621.638	-1.25	38.88	2820
KKDELpSDYAEK	1	S(6): 100.0; Y(8): 0.0	357	P46100	Transcriptional regulator ATRX OS=Homo sapiens GN=ATRX PE=1 SV=3 - [ATRX_HUMAN]	1	P46100	S1061	Transcriptional regulator ATRX (EC 3.6.4.12) (ATP-dependent helicase ATRX) (X-linked helicase II) (X-linked nuclear protein) (XNP) (Znf-HX)	ATRX RAD54L XH2																									Reverse	Class I	kkDELsDYAEk	1	K1(Dimethyl); N-Term(Dimethyl); K2(Dimethyl); S6(Phospho); K11(Dimethyl)	59	ETD	33	2	1517.75	3	506.588	0.01	58.26	3783
RTHpSEGSLLQEPR	1	T(2): 0.0; S(4): 100.0; S(7): 0.0	357	P49796	Regulator of G-protein signaling 3 OS=Homo sapiens GN=RGS3 PE=1 SV=2 - [RGS3_HUMAN]	1	P49796	S943	Regulator of G-protein signaling 3 (RGP3) (RGS3)	RGS3																									Reverse	Class I	rTHsEGSLLQEPR	1	N-Term(Dimethyl); S4(Phospho)	82	ETD	35	1	1617.77	3	539.93	-0.12	63.28	4033
KTpSPASLDFPESQK	1	T(2): 0.0; S(3): 100.0; S(6): 0.0; S(12): 0.0	357	Q96JM3	Zinc finger protein 828 OS=Homo sapiens GN=ZNF828 PE=1 SV=2 - [ZN828_HUMAN]	1	Q96JM3	S459	Chromosome alignment-maintaining phosphoprotein 1 (Zinc finger protein 828)	CHAMP1 C13orf8 CAMP KIAA1802 ZNF828																									Reverse	Class I	kTsPASLDFPESQk	1	N-Term(Dimethyl:2H(4)); K1(Dimethyl:2H(4)); S3(Phospho); K14(Dimethyl:2H(4))	64	ETD	28	1	1710.91	3	570.974	-1.4	87.57	6040
SRWDETPASQMGGSpTPVLTPGK	1	S(1): 0.0; T(6): 0.0; S(9): 0.0; S(14): 0.5; T(15): 99.5; T(19): 0.0	357	O75533	Splicing factor 3B subunit 1 OS=Homo sapiens GN=SF3B1 PE=1 SV=2 - [SF3B1_HUMAN]	1	O75533	T350	Splicing factor 3B subunit 1 (Pre-mRNA-splicing factor SF3b 155 kDa subunit) (SF3b155) (Spliceosome-associated protein 155) (SAP 155)	SF3B1 SAP155																									Reverse	Class I	sRWDETPASQmGGStPVLTPGk	1	N-Term(Dimethyl); M11(Oxidation); T15(Phospho); K22(Dimethyl)	53	HCD	29	1	2454.14	3	818.717	0.05	91.93	6263
RWpSWGGSAMANSESK	1	S(3): 100.0; S(7): 0.0; S(12): 0.0; S(14): 0.0	357	Q8IWC1	MAP7 domain-containing protein 3 OS=Homo sapiens GN=MAP7D3 PE=1 SV=2 - [MA7D3_HUMAN]	1	Q8IWC1	S165	MAP7 domain-containing protein 3	MAP7D3																									Reverse	Class I	rWsWGGSAMANSESk	1	N-Term(Dimethyl:2H(4)); S3(Phospho); K15(Dimethyl:2H(4))	95	ETD	29	1	1797.83	3	599.947	2.44	115.87	6758
DLDEDELLGNLpSETELK	1	S(12): 100.0; T(14): 0.0	357	Q9NYL9	Tropomodulin-3 OS=Homo sapiens GN=TMOD3 PE=1 SV=1 - [TMOD3_HUMAN]	1	Q9NYL9	S25	Tropomodulin-3 (Ubiquitous tropomodulin) (U-Tmod)	TMOD3																									Reverse	Class I	dLDEDELLGNLsETELk	1	N-Term(Dimethyl); S12(Phospho); K17(Dimethyl)	105	ETD	12	0	2068.96	3	690.324	-0.04	92.01	7151
ITKPGpSIDSNNQLFAPGGR	1	T(2): 0.0; S(6): 100.0; S(9): 0.0	357	Q04637	Eukaryotic translation initiation factor 4 gamma 1 OS=Homo sapiens GN=EIF4G1 PE=1 SV=3 - [IF4G1_HUMAN]	1	Q04637	S1078	Eukaryotic translation initiation factor 4 gamma 1 (eIF-4-gamma 1) (eIF-4G 1) (eIF-4G1) (p220)	EIF4G1 EIF4F EIF4G EIF4GI																									Reverse	Class I	iTkPGsIDSNNQLFAPGGR	1	N-Term(Dimethyl:2H(4)); K3(Dimethyl:2H(4)); S6(Phospho)	77	ETD	28	0	2116.1	3	706.037	-3.54	112.55	7466
MILIQDGpSQNTNVDKPLR	1	S(8): 100.0; T(11): 0.0	357	Q92945	Far upstream element-binding protein 2 OS=Homo sapiens GN=KHSRP PE=1 SV=3 - [FUBP2_HUMAN]	1	Q92945	S274	Far upstream element-binding protein 2 (FUSE-binding protein 2) (KH type-splicing regulatory protein) (KSRP) (p75)	KHSRP FUBP2																									Reverse	Class I	mILIQDGsQNTNVDkPLR	1	N-Term(Dimethyl:2H(4)); S8(Phospho); K15(Dimethyl:2H(4))	64	ETD	28	0	2186.18	3	729.397	13.12	114.31	7529
SFSKEELMSpSDLEETAGSTSIPK	1	S(1): 0.0; S(3): 0.0; S(9): 0.0; S(10): 100.0; T(15): 0.0; S(18): 0.0; T(19): 0.0; S(20): 0.0	357	O00567	Nucleolar protein 5A OS=Homo sapiens GN=NOL5A PE=1 SV=4 - [NOL5A_HUMAN]	1	O00567	S520	Nucleolar protein 56 (Nucleolar protein 5A)	NOP56 NOL5A																									Reverse	Class I	sFSkEELmSsDLEETAGSTSIPk	1	N-Term(Dimethyl:2H(4)); K4(Dimethyl:2H(4)); M8(Oxidation); S10(Phospho); K23(Dimethyl:2H(4))	46	HCD	28	1	2665.29	3	889.102	-1.65	119.28	7860
LENVSQLSLDKpSPTEK	1	S(5): 0.0; S(8): 0.0; S(12): 100.0; T(14): 0.0	357	Q86W56	Poly(ADP-ribose) glycohydrolase OS=Homo sapiens GN=PARG PE=1 SV=1 - [PARG_HUMAN]	1	Q86W56	S137	Poly(ADP-ribose) glycohydrolase (EC 3.2.1.143)	PARG																									Reverse	Class I	lENVSQLSLDksPTEk	1	N-Term(Dimethyl:2H(4)); K11(Dimethyl:2H(4)); S12(Phospho); K16(Dimethyl:2H(4))	90	ETD	27	1	1964.08	3	655.363	0.48	112.25	9452
NSTLSDSGMIDNLPDpSPDEVAK	1	S(2): 0.0; T(3): 0.0; S(5): 0.0; S(7): 0.0; S(16): 100.0	356	Q9P0V3	SH3 domain-binding protein 4 OS=Homo sapiens GN=SH3BP4 PE=1 SV=1 - [SH3B4_HUMAN]	1	Q9P0V3	S131	SH3 domain-binding protein 4 (EH-binding protein 10) (Transferrin receptor-trafficking protein)	SH3BP4 BOG25 EHB10 TTP																									Reverse	Class I	nSTLSDSGMIDNLPDsPDEVAk	1	N-Term(Dimethyl:2H(4)); S16(Phospho); K22(Dimethyl:2H(4))	53	HCD	14	0	2449.13	3	817.048	0.49	135.25	10186
RDpSQSSNEFLTISDSK	1	S(3): 100.0; S(5): 0.0; S(6): 0.0; T(11): 0.0; S(13): 0.0; S(15): 0.0	356	Q9NSY1	BMP-2-inducible protein kinase OS=Homo sapiens GN=BMP2K PE=1 SV=2 - [BMP2K_HUMAN]	1	Q9NSY1	S1029	BMP-2-inducible protein kinase (BIKe) (EC 2.7.11.1)	BMP2K BIKE HRIHFB2017																									Reverse	Class I	rDsQSSNEFLTISDSk	1	N-Term(Dimethyl); S3(Phospho); K16(Dimethyl)	58	HCD	28	1	1949.92	2	975.462	16.42	131.69	11402
RSpSTSSEPTPTVK	1	S(2): 0.0; S(3): 100.0; T(4): 0.0; S(5): 0.0; S(6): 0.0; T(9): 0.0; T(11): 0.0	356	Q69YQ0	Cytospin-A OS=Homo sapiens GN=SPECC1L PE=1 SV=1 - [CYTSA_HUMAN]	1	Q69YQ0	S832	Cytospin-A (Renal carcinoma antigen NY-REN-22) (Sperm antigen with calponin homology and coiled-coil domains 1-like) (SPECC1-like protein)	SPECC1L CYTSA KIAA0376																									Reverse	Class I	rSsTSSEPTPTVk	1	N-Term(Dimethyl:2H(4)); S3(Phospho); K13(Dimethyl:2H(4))	104	ETD	28	1	1520.78	3	507.598	-1.81	33.09	2442
METVSNASSSpSNPSpSPGR	2	T(3): 0.0; S(5): 0.0; S(8): 0.0; S(9): 0.0; S(10): 2.8; S(11): 97.2; S(14): 2.8; S(15): 97.2	356	Q9NTI5	Sister chromatid cohesion protein PDS5 homolog B OS=Homo sapiens GN=PDS5B PE=1 SV=1 - [PDS5B_HUMAN]	1	Q9NTI5	S1162, S1166	Sister chromatid cohesion protein PDS5 homolog B (Androgen-induced proliferation inhibitor) (Androgen-induced prostate proliferative shutoff-associated protein AS3)	PDS5B APRIN AS3 KIAA0979																									Reverse	Class I	mETVSNASSSsNPsSPGR	1	N-Term(Dimethyl:2H(4)); S11(Phospho); S14(Phospho)	71	ETD	7	0	1986.79	3	662.933	1.95	36.18	2617
ESEQEpSEEEILAQKK	1	S(2): 0.0; S(6): 100.0	356	Q9BW71	HIRA-interacting protein 3 OS=Homo sapiens GN=HIRIP3 PE=1 SV=3 - [HIRP3_HUMAN]	1	Q9BW71	S227	HIRA-interacting protein 3	HIRIP3																									Reverse	Class I	eSEQEsEEEILAQkk	1	N-Term(Dimethyl:2H(4)); S6(Phospho); K14(Dimethyl:2H(4)); K15(Dimethyl:2H(4))	80	ETD	27	1	1952.98	3	651.665	-2.11	75.5	5163
SIDDEITEAKpSGTATPQR	1	S(1): 0.0; T(7): 0.0; S(11): 100.0; T(13): 0.0; T(15): 0.0	356	Q13131	5'-AMP-activated protein kinase catalytic subunit alpha-1 OS=Homo sapiens GN=PRKAA1 PE=1 SV=3 - [AAPK1_HUMAN]	1	Q13131	S477	5'-AMP-activated protein kinase catalytic subunit alpha-1 (AMPK subunit alpha-1) (EC 2.7.11.1) (Tau-protein kinase PRKAA1) (EC 2.7.11.26)	PRKAA1 AMPK1																									Reverse	Class I	sIDDEITEAksGTATPQR	1	N-Term(Dimethyl:2H(4)); K10(Dimethyl:2H(4)); S11(Phospho)	82	ETD	27	1	2063.01	3	688.343	-0.34	79.6	5308
GGIDNPAITpSDQELDDKK	1	T(9): 0.0; S(10): 100.0	356	Q13017	Rho GTPase-activating protein 5 OS=Homo sapiens GN=ARHGAP5 PE=1 SV=2 - [RHG05_HUMAN]	1	Q13017	S1218	Rho GTPase-activating protein 5 (Rho-type GTPase-activating protein 5) (p190-B)	ARHGAP5 RHOGAP5																									Reverse	Class I	gGIDNPAITsDQELDDkk	1	N-Term(Dimethyl:2H(4)); S10(Phospho); K17(Dimethyl:2H(4)); K18(Dimethyl:2H(4))	103	ETD	27	1	2092.06	3	698.025	-0.19	82.61	5478
NEEENIpYSVPHDSTQGK	1	Y(7): 100.0; S(8): 0.0; S(13): 0.0; T(14): 0.0	356	Q9NRY4	Glucocorticoid receptor DNA-binding factor 1 OS=Homo sapiens GN=GRLF1 PE=1 SV=2 - [GRLF1_HUMAN]	1	Q9NRY4	Y1105	Rho GTPase-activating protein 35 (Glucocorticoid receptor DNA-binding factor 1) (Glucocorticoid receptor repression factor 1) (GRF-1) (Rho GAP p190A) (p190-A)	ARHGAP35 GRF1 GRLF1 KIAA1722																									Reverse	Class I	nEEENIySVPHDSTQGk	1	N-Term(Dimethyl:2H(4)); Y7(Phospho); K17(Dimethyl:2H(4))	64	HCD	28	0	2090.99	2	1046	16.51	75.94	6172
TTAAHpSLVGTPYYMSPER	1	T(1): 0.0; T(2): 0.0; S(6): 100.0; T(10): 0.0; Y(12): 0.0; Y(13): 0.0; S(15): 0.0	356	Q8TDX7	Serine/threonine-protein kinase Nek7 OS=Homo sapiens GN=NEK7 PE=1 SV=1 - [NEK7_HUMAN]	1	Q8TDX7	S195	Serine/threonine-protein kinase Nek7 (EC 2.7.11.1) (Never in mitosis A-related kinase 7) (NimA-related protein kinase 7)	NEK7																									Reverse	Class I	tTAAHsLVGTPYYMSPER	1	N-Term(Dimethyl:2H(4)); S6(Phospho)	71	ETD	28	0	2092.96	3	698.324	-5.9	109.01	7236
KEDpSDEEEDDDpSEEDEEDDEDEDEDEDEIEPAAMK	2	S(4): 100.0; S(12): 100.0	356	P19338	Nucleolin OS=Homo sapiens GN=NCL PE=1 SV=3 - [NUCL_HUMAN]	1	P19338	S145, S153	Nucleolin (Protein C23)	NCL																									Reverse	Class I	kEDsDEEEDDDsEEDEEDDEDEDEDEDEIEPAAMk	1	N-Term(Dimethyl); K1(Dimethyl); S4(Phospho); S12(Phospho); K35(Dimethyl)	66	HCD	13	1	4363.46	3	1455.16	-2.31	107.96	7959
YKDNPFSLGEpSFGSR	1	Y(1): 0.0; S(7): 0.0; S(11): 100.0; S(14): 0.0	356	Q8N6H7	ADP-ribosylation factor GTPase-activating protein 2 OS=Homo sapiens GN=ARFGAP2 PE=1 SV=1 - [ARFG2_HUMAN]	1	Q8N6H7	S368	ADP-ribosylation factor GTPase-activating protein 2 (ARF GAP 2) (GTPase-activating protein ZNF289) (Zinc finger protein 289)	ARFGAP2 ZNF289 Nbla10535																									Reverse	Class I	ykDNPFSLGEsFGSR	1	N-Term(Dimethyl); K2(Dimethyl); S11(Phospho)	98	ETD	29	1	1839.84	3	613.95	2.13	135.02	8851
SLYGDVDpSPLPTGEAGGPPSTR	1	S(1): 0.0; Y(3): 0.0; S(8): 100.0; T(12): 0.0; S(20): 0.0; T(21): 0.0	355	Q9Y4B5	Uncharacterized protein KIAA0802 OS=Homo sapiens GN=KIAA0802 PE=1 SV=3 - [K0802_HUMAN]	1	Q9Y4B5	S540	Coiled-coil domain-containing protein 165	CCDC165 KIAA0802																									Reverse	Class I	sLYGDVDsPLPTGEAGGPPSTR	1	N-Term(Dimethyl); S8(Phospho)	111	HCD	14	0	2281.04	2	1141.03	2.51	125.48	10448
LTFDTTFpSPNTGKK	1	T(2): 0.0; T(5): 0.0; T(6): 0.0; S(8): 100.0; T(11): 0.0	355	P45880	Voltage-dependent anion-selective channel protein 2 OS=Homo sapiens GN=VDAC2 PE=1 SV=2 - [VDAC2_HUMAN]	1	P45880	S115	Voltage-dependent anion-selective channel protein 2 (VDAC-2) (hVDAC2) (Outer mitochondrial membrane protein porin 2)	VDAC2																									Reverse	Class I	lTFDTTFsPNTGkk	1	N-Term(Dimethyl); S8(Phospho); K13(Dimethyl); K14(Dimethyl)	54	ETD	28	1	1720.87	3	574.296	10.08	128.45	10854
ApTSNVFAMFDQSQIQEFK	1	T(2): 96.5; S(3): 3.5; S(12): 0.0	355	P19105	Myosin regulatory light chain MRLC3 OS=Homo sapiens GN=MRLC3 PE=1 SV=2 - [MRLC3_HUMAN]	1	P19105	T18	Myosin regulatory light chain 12A (MLC-2B) (Myosin RLC) (Myosin regulatory light chain 2, nonsarcomeric) (Myosin regulatory light chain MRLC3)	MYL12A MLCB MRLC3 RLC																									Reverse	Class I	atSNVFAMFDQSQIQEFk	1	N-Term(Dimethyl:2H(4)); T2(Phospho); K18(Dimethyl:2H(4))	76	ETD	14	0	2235.07	3	745.695	3.29	153.14	11630
QSVVYGGKpSTIRDR	1	S(2): 0.0; Y(5): 0.0; S(9): 100.0; T(10): 0.0	355	Q8WWY3	U4/U6 small nuclear ribonucleoprotein Prp31 OS=Homo sapiens GN=PRPF31 PE=1 SV=2 - [PRP31_HUMAN]	1	Q8WWY3	S439	U4/U6 small nuclear ribonucleoprotein Prp31 (Pre-mRNA-processing factor 31) (Serologically defined breast cancer antigen NY-BR-99) (U4/U6 snRNP 61 kDa protein) (Protein 61K) (hPrp31)	PRPF31 PRP31																									Reverse	Class I	qSVVYGGksTIRDR	1	N-Term(Dimethyl); K8(Dimethyl); S9(Phospho)	79	ETD	32	2	1701.87	3	567.962	1.41	51.23	3387
RDpSDGVDGFEAEGKK	1	S(3): 100.0	355	Q96KR1	Zinc finger RNA-binding protein OS=Homo sapiens GN=ZFR PE=1 SV=2 - [ZFR_HUMAN]	1	Q96KR1	S1054	Zinc finger RNA-binding protein (hZFR) (M-phase phosphoprotein homolog)	ZFR																									Reverse	Class I	rDsDGVDGFEAEGkk	1	N-Term(Dimethyl:2H(4)); S3(Phospho); K14(Dimethyl:2H(4)); K15(Dimethyl:2H(4))	74	ETD	31	2	1785.88	3	595.964	-2.26	58.86	3586
YNLDApSEEEDSNKK	1	Y(1): 0.0; S(6): 100.0; S(11): 0.0	355	O95218	Zinc finger Ran-binding domain-containing protein 2 OS=Homo sapiens GN=ZRANB2 PE=1 SV=2 - [ZRAB2_HUMAN]	1	O95218	S188	Zinc finger Ran-binding domain-containing protein 2 (Zinc finger protein 265) (Zinc finger, splicing)	ZRANB2 ZIS ZNF265																									Reverse	Class I	yNLDAsEEEDSNkk	1	N-Term(Dimethyl:2H(4)); S6(Phospho); K13(Dimethyl:2H(4)); K14(Dimethyl:2H(4))	94	ETD	28	1	1817.85	3	606.623	-2.68	62.4	4389
RYEDDGIpSDDEIEGKR	1	Y(2): 0.0; S(8): 100.0	355	Q9Y2K7	JmjC domain-containing histone demethylation protein 1A OS=Homo sapiens GN=FBXL11 PE=1 SV=3 - [JHD1A_HUMAN]	1	Q9Y2K7	S28	Lysine-specific demethylase 2A (EC 1.14.11.27) (CXXC-type zinc finger protein 8) (F-box and leucine-rich repeat protein 11) (F-box protein FBL7) (F-box protein Lilina) (F-box/LRR-repeat protein 11) (JmjC domain-containing histone demethylation protein 1A) ([Histone-H3]-lysine-36 demethylase 1A)	KDM2A CXXC8 FBL7 FBXL11 JHDM1A KIAA1004																									Reverse	Class I	rYEDDGIsDDEIEGkR	1	N-Term(Dimethyl); S8(Phospho); K15(Dimethyl)	76	ETD	32	2	2032.89	3	678.303	3.76	72.5	4572
HTSISESSRQpSLPSLK	1	T(2): 0.0; S(3): 0.0; S(5): 0.0; S(7): 0.0; S(8): 0.0; S(11): 100.0; S(14): 0.0	355	P46939	Utrophin OS=Homo sapiens GN=UTRN PE=1 SV=1 - [UTRO_HUMAN]	1	P46939	S833	Utrophin (Dystrophin-related protein 1) (DRP-1)	UTRN DMDL DRP1																									Reverse	Class I	hTSISESSRQsLPSLk	1	N-Term(Dimethyl:2H(4)); S11(Phospho); K16(Dimethyl:2H(4))	77	ETD	33	1	1901	3	634.337	-0.57	76.9	4802
YRpSDIHTEAVQAALAK	1	Y(1): 0.0; S(3): 100.0; T(7): 0.0	355	Q9P265	Disco-interacting protein 2 homolog B OS=Homo sapiens GN=DIP2B PE=1 SV=3 - [DIP2B_HUMAN]	1	Q9P265	S100	Disco-interacting protein 2 homolog B (DIP2 homolog B)	DIP2B KIAA1463																									Reverse	Class I	yRsDIHTEAVQAALAk	1	N-Term(Dimethyl:2H(4)); S3(Phospho); K16(Dimethyl:2H(4))	91	ETD	32	1	1917.01	3	639.674	-1.13	95.3	5467
HQTLEVSLSRDpSPLK	1	T(3): 0.0; S(7): 0.0; S(9): 0.0; S(12): 100.0	355	Q8NCF5	NFATC2-interacting protein OS=Homo sapiens GN=NFATC2IP PE=1 SV=1 - [NF2IP_HUMAN]	1	Q8NCF5	S369	NFATC2-interacting protein (45 kDa NF-AT-interacting protein) (45 kDa NFAT-interacting protein) (Nuclear factor of activated T-cells, cytoplasmic 2-interacting protein)	NFATC2IP NIP45																									Reverse	Class I	hQTLEVSLSRDsPLk	1	N-Term(Dimethyl); S12(Phospho); K15(Dimethyl)	98	ETD	33	1	1845.95	3	615.987	-0.84	92.53	5617
KSTGpSPTQETQAPFIAK	1	S(2): 0.0; T(3): 0.0; S(5): 100.0; T(7): 0.0; T(10): 0.0	355	O15231	Zinc finger protein 185 OS=Homo sapiens GN=ZNF185 PE=1 SV=2 - [ZN185_HUMAN]	1	O15231	S71	Zinc finger protein 185 (LIM domain protein ZNF185) (P1-A)	ZNF185																									Reverse	Class I	kSTGsPTQETQAPFIAk	1	N-Term(Dimethyl:2H(4)); K1(Dimethyl:2H(4)); S5(Phospho); K17(Dimethyl:2H(4))	83	ETD	28	1	1967.06	3	656.358	-2.32	84.28	5804
ENQEPLRpSLEDENK	1	S(8): 100.0	355	P48681	Nestin OS=Homo sapiens GN=NES PE=1 SV=2 - [NEST_HUMAN]	1	P48681	S702	Nestin	NES Nbla00170																									Reverse	Class I	eNQEPLRsLEDENk	1	N-Term(Dimethyl:2H(4)); S8(Phospho); K14(Dimethyl:2H(4))	72	ETD	28	1	1844.88	3	615.632	-3.12	87.3	5982
RSATLSGpSATNLASLTAALAK	1	S(2): 0.0; T(4): 0.0; S(6): 0.0; S(8): 100.0; T(10): 0.0; S(14): 0.0; T(16): 0.0	355	Q9NQT8	Kinesin-like protein KIF13B OS=Homo sapiens GN=KIF13B PE=1 SV=1 - [KI13B_HUMAN]	1	Q9NQT8	S1797	Kinesin-like protein KIF13B (Kinesin-like protein GAKIN)	KIF13B GAKIN KIAA0639																									Reverse	Class I	rSATLSGsATNLASLTAALAk	1	N-Term(Dimethyl); S8(Phospho); K21(Dimethyl)	79	ETD	28	1	2140.14	3	714.052	1.97	141.05	8984
METVSNASSSSNPSpSPGR	1	T(3): 0.0; S(5): 0.0; S(8): 0.0; S(9): 0.0; S(10): 0.0; S(11): 0.0; S(14): 0.0; S(15): 100.0	354	Q9NTI5	Sister chromatid cohesion protein PDS5 homolog B OS=Homo sapiens GN=PDS5B PE=1 SV=1 - [PDS5B_HUMAN]	1	Q9NTI5	S1166	Sister chromatid cohesion protein PDS5 homolog B (Androgen-induced proliferation inhibitor) (Androgen-induced prostate proliferative shutoff-associated protein AS3)	PDS5B APRIN AS3 KIAA0979																									Reverse	Class I	mETVSNASSSSNPSsPGR	1	N-Term(Dimethyl); M1(Oxidation); S15(Phospho)	79	ETD	14	0	1918.78	3	640.266	-0.49	32.53	2302
KAVAEEDNGSIGEETDSpSPGRK	1	S(10): 0.0; T(15): 0.0; S(17): 0.0; S(18): 100.0	354	Q13586	Stromal interaction molecule 1 OS=Homo sapiens GN=STIM1 PE=1 SV=2 - [STIM1_HUMAN]	1	Q13586	S668	Stromal interaction molecule 1	STIM1 GOK																									Reverse	Class I	kAVAEEDNGSIGEETDSsPGRk	1	N-Term(Dimethyl:2H(4)); K1(Dimethyl:2H(4)); S18(Phospho); K22(Dimethyl:2H(4))	45	HCD	31	2	2452.19	3	818.068	-3.98	39.95	2551
YHGHpSMSDPGVSYR	1	Y(1): 0.0; S(5): 100.0; S(7): 0.0; S(12): 0.0; Y(13): 0.0	354	P08559	Pyruvate dehydrogenase E1 component subunit alpha, somatic form, mitochondrial OS=Homo sapiens GN=PDHA1 PE=1 SV=3 - [ODPA_HUMAN]	1	P08559	S293	Pyruvate dehydrogenase E1 component subunit alpha, somatic form, mitochondrial (EC 1.2.4.1) (PDHE1-A type I)	PDHA1 PHE1A																									Reverse	Class I	yHGHsmSDPGVSYR	1	N-Term(Dimethyl); S5(Phospho); M6(Oxidation)	93	ETD	35	0	1716.68	3	572.9	0.35	42.7	2864
RAQpSTDpSLGTSGSLQSK	2	S(4): 96.8; T(5): 3.2; S(7): 100.0; T(10): 0.0; S(11): 0.0; S(13): 0.0; S(16): 0.0	354	Q15276	Rab GTPase-binding effector protein 1 OS=Homo sapiens GN=RABEP1 PE=1 SV=2 - [RABE1_HUMAN]	1	Q15276	S407, S410	Rab GTPase-binding effector protein 1 (Rabaptin-4) (Rabaptin-5) (Rabaptin-5alpha) (Renal carcinoma antigen NY-REN-17)	RABEP1 RAB5EP RABPT5 RABPT5A																									Reverse	Class I	rAQStDsLGTSGSLQSk	1	N-Term(Dimethyl); T5(Phospho); S7(Phospho); K17(Dimethyl)	82	ETD	15	1	1938.86	3	646.957	0.23	57.84	3699
VLDTSSLTQpSAPApSPTNK	2	T(4): 0.0; S(5): 0.0; S(6): 0.0; T(8): 0.0; S(10): 100.0; S(14): 100.0; T(16): 0.0	354	Q8N122	Regulatory-associated protein of mTOR OS=Homo sapiens GN=RAPTOR PE=1 SV=1 - [RPTOR_HUMAN]	1	Q8N122	S859, S863	Regulatory-associated protein of mTOR (Raptor) (p150 target of rapamycin (TOR)-scaffold protein)	RPTOR KIAA1303 RAPTOR																									Reverse	Class I	vLDTSSLTQsAPAsPTNk	1	N-Term(Dimethyl); S10(Phospho); S14(Phospho); K18(Dimethyl)	101	ETD	7	0	2032.92	3	678.312	-1.35	60.49	4204
FLSHpSTDSLNK	1	S(3): 0.0; S(5): 100.0; T(6): 0.0; S(8): 0.0	354	Q12802	A-kinase anchor protein 13 OS=Homo sapiens GN=AKAP13 PE=1 SV=2 - [AKP13_HUMAN]	1	Q12802	S1929	A-kinase anchor protein 13 (AKAP-13) (AKAP-Lbc) (Breast cancer nuclear receptor-binding auxiliary protein) (Guanine nucleotide exchange factor Lbc) (Human thyroid-anchoring protein 31) (Lymphoid blast crisis oncogene) (LBC oncogene) (Non-oncogenic Rho GTPase-specific GTP exchange factor) (Protein kinase A-anchoring protein 13) (PRKA13) (p47)	AKAP13 BRX HT31 LBC																									Reverse	Class I	fLSHsTDSLNk	1	N-Term(Dimethyl); S5(Phospho); K11(Dimethyl)	60	ETD	28	0	1384.65	3	462.221	-2.12	66.27	4636
SQIDVALpSQDpSTYQGER	2	S(1): 0.0; S(8): 100.0; S(11): 100.0; T(12): 0.0; Y(13): 0.0	354	Q92900	Regulator of nonsense transcripts 1 OS=Homo sapiens GN=UPF1 PE=1 SV=2 - [RENT1_HUMAN]	1	Q92900	S1107, S1110	Regulator of nonsense transcripts 1 (EC 3.6.4.-) (ATP-dependent helicase RENT1) (Nonsense mRNA reducing factor 1) (NORF1) (Up-frameshift suppressor 1 homolog) (hUpf1)	UPF1 KIAA0221 RENT1																									Reverse	Class I	sQIDVALsQDsTYQGER	1	N-Term(Dimethyl); S8(Phospho); S11(Phospho)	78	ETD	8	0	2084.86	3	695.624	0.49	68.85	4817
DSFSHpSPGAVSSLK	1	S(2): 0.0; S(4): 0.0; S(6): 100.0; S(11): 0.0; S(12): 0.0	354	Q9H6R7	WD repeat-containing protein C2orf44 OS=Homo sapiens GN=C2orf44 PE=1 SV=1 - [CB044_HUMAN]	1	Q9H6R7	S690	WD repeat-containing protein C2orf44	C2orf44 PP384																									Reverse	Class I	dSFSHsPGAVSSLk	1	N-Term(Dimethyl:2H(4)); S6(Phospho); K14(Dimethyl:2H(4))	88	ETD	27	0	1562.76	3	521.592	-5.66	78.43	5241
IRpSIEALLEAGQAR	1	S(3): 100.0	354	Q9P2E9	Ribosome-binding protein 1 OS=Homo sapiens GN=RRBP1 PE=1 SV=4 - [RRBP1_HUMAN]	1	Q9P2E9	S959	Ribosome-binding protein 1 (180 kDa ribosome receptor homolog) (RRp) (ES/130-related protein) (Ribosome receptor protein)	RRBP1 KIAA1398																									Reverse	Class I	iRsIEALLEAGQAR	1	N-Term(Dimethyl); S3(Phospho)	80	ETD	29	1	1634.85	3	545.62	-10.18	137.18	7904
MLpSSSDAITQEFMDLR	1	S(3): 100.0; S(4): 0.0; S(5): 0.0; T(9): 0.0	353	Q9UPN3	Microtubule-actin cross-linking factor 1, isoforms 1/2/3/5 OS=Homo sapiens GN=MACF1 PE=1 SV=3 - [MACF1_HUMAN]	1	Q9UPN3	S1376	Microtubule-actin cross-linking factor 1, isoforms 1/2/3/5 (620 kDa actin-binding protein) (ABP620) (Actin cross-linking family protein 7) (Macrophin-1) (Trabeculin-alpha)	MACF1 ABP620 ACF7 KIAA0465 KIAA1251																									Reverse	Class I	mLsSSDAITQEFMDLR	1	N-Term(Dimethyl); S3(Phospho)	67	ETD	14	0	1951.86	3	651.291	1.55	152.09	11558
KLGAGEGGEApSVpSPEK	2	S(11): 100.0; S(13): 100.0	353	Q13428	Treacle protein OS=Homo sapiens GN=TCOF1 PE=1 SV=2 - [TCOF_HUMAN]	1	Q13428	S1376, S1378	Treacle protein (Treacher Collins syndrome protein)	TCOF1																									Reverse	Class I	kLGAGEGGEAsVsPEk	1	N-Term(Dimethyl); K1(Dimethyl); S11(Phospho); S13(Phospho); K16(Dimethyl)	85	ETD	18-20	1	1759.79	3	587.269	0.88	42.23	2925
KYEpSDEDpSLGSSGR	2	Y(2): 0.0; S(4): 100.0; S(8): 100.0; S(11): 0.0; S(12): 0.0	353	O00418	Elongation factor 2 kinase OS=Homo sapiens GN=EEF2K PE=1 SV=1 - [EF2K_HUMAN]	1	O00418	S470, S474	Eukaryotic elongation factor 2 kinase (eEF-2 kinase) (eEF-2K) (EC 2.7.11.20) (Calcium/calmodulin-dependent eukaryotic elongation factor 2 kinase)	EEF2K																									Reverse	Class I	kYEsDEDsLGSSGR	1	K1(Dimethyl); N-Term(Dimethyl); S4(Phospho); S8(Phospho)	82	ETD	15	1	1745.67	3	582.561	0.3	44.45	2961
TLHCEGTEINpSDDEQESK	1	T(1): 0.0; T(7): 0.0; S(11): 100.0; S(17): 0.0	353	Q9BPX3	Condensin complex subunit 3 OS=Homo sapiens GN=NCAPG PE=1 SV=1 - [CND3_HUMAN]	1	Q9BPX3	S674	Condensin complex subunit 3 (Chromosome-associated protein G) (Condensin subunit CAP-G) (hCAP-G) (Melanoma antigen NY-MEL-3) (Non-SMC condensin I complex subunit G) (XCAP-G homolog)	NCAPG CAPG NYMEL3																									Reverse	Class I	tLHcEGTEINsDDEQESk	1	N-Term(Dimethyl); C4(Carbamidomethyl); S11(Phospho); K18(Dimethyl)	63	ETD	28	0	2227.9	3	743.305	-2.49	51.3	3645
GSPGLASGSVGQpSPNSAPK	1	S(2): 0.0; S(7): 0.0; S(9): 0.0; S(13): 100.0; S(16): 0.0	353	Q14162	Endothelial cells scavenger receptor OS=Homo sapiens GN=SCARF1 PE=1 SV=2 - [SREC_HUMAN]	1	Q14162	S753	Scavenger receptor class F member 1 (Acetyl LDL receptor) (Scavenger receptor expressed by endothelial cells 1) (SREC-I)	SCARF1 KIAA0149 SREC																									Reverse	Class I	gSPGLASGSVGQsPNSAPk	1	N-Term(Dimethyl:2H(4)); S13(Phospho); K19(Dimethyl:2H(4))	77	ETD	14	0	1841.92	3	614.646	0	61.28	4535
GGVTGpSPEASISGSKGDLK	1	T(4): 0.0; S(6): 100.0; S(10): 0.0; S(12): 0.0; S(14): 0.0	353	Q09666	Neuroblast differentiation-associated protein AHNAK OS=Homo sapiens GN=AHNAK PE=1 SV=2 - [AHNK_HUMAN]	1	Q09666	S5731	Neuroblast differentiation-associated protein AHNAK (Desmoyokin)	AHNAK PM227																									Reverse	Class I	gGVTGsPEASISGSkGDLk	1	N-Term(Dimethyl:2H(4)); S6(Phospho); K15(Dimethyl:2H(4)); K19(Dimethyl:2H(4))	88	ETD	28	1	1923.02	3	641.678	-1.71	73.46	5141
LSKpSQGGEEEGPLSDK	1	S(2): 0.0; S(4): 100.0; S(14): 0.0	353	Q9H063	Repressor of RNA polymerase III transcription MAF1 homolog OS=Homo sapiens GN=MAF1 PE=1 SV=1 - [MAF1_HUMAN]	1	Q9H063	S75	Repressor of RNA polymerase III transcription MAF1 homolog	MAF1																									Reverse	Class I	lSksQGGEEEGPLSDk	1	N-Term(Dimethyl:2H(4)); K3(Dimethyl:2H(4)); S4(Phospho); K16(Dimethyl:2H(4))	72	HCD	27	1	1836.94	2	918.973	0.84	72.62	5941
NWTEDMEGGISpSPVKK	1	T(3): 0.0; S(11): 0.0; S(12): 100.0	353	P08651	Nuclear factor 1 C-type OS=Homo sapiens GN=NFIC PE=1 SV=2 - [NFIC_HUMAN]	1	P08651	S323	Nuclear factor 1 C-type (NF1-C) (Nuclear factor 1/C) (CCAAT-box-binding transcription factor) (CTF) (Nuclear factor I/C) (NF-I/C) (NFI-C) (TGGCA-binding protein)	NFIC NFI																									Reverse	Class I	nWTEDMEGGISsPVkk	1	N-Term(Dimethyl:2H(4)); S12(Phospho); K15(Dimethyl:2H(4)); K16(Dimethyl:2H(4))	58	ETD	28	1	1953.98	3	651.997	-0.59	109.36	7256
DTFEHDPSEpSIDEFNK	1	T(2): 0.0; S(8): 0.0; S(10): 100.0	353	Q9NYF8	Bcl-2-associated transcription factor 1 OS=Homo sapiens GN=BCLAF1 PE=1 SV=2 - [BCLF1_HUMAN]	1	Q9NYF8	S198	Bcl-2-associated transcription factor 1 (Btf)	BCLAF1 BTF KIAA0164																									Reverse	Class I	dTFEHDPSEsIDEFNk	1	N-Term(Dimethyl); S10(Phospho); K16(Dimethyl)	73	ETD	26	0	2045.84	3	682.618	0.22	107.72	7463
SLEEDLETLKpSLEK	1	S(1): 0.0; T(8): 0.0; S(11): 100.0	353	P48681	Nestin OS=Homo sapiens GN=NES PE=1 SV=2 - [NEST_HUMAN]	1	P48681	S588	Nestin	NES Nbla00170																									Reverse	Class I	sLEEDLETLksLEk	1	N-Term(Dimethyl); K10(Dimethyl); S11(Phospho); K14(Dimethyl)	71	ETD	28	1	1797.91	3	599.976	0.57	145.1	9402
TSEIEPKNpSPEDLGLSLTGDSCK	1	T(1): 0.0; S(2): 0.0; S(9): 100.0; S(16): 0.0; T(18): 0.0; S(21): 0.0	352	Q12888	Tumor suppressor p53-binding protein 1 OS=Homo sapiens GN=TP53BP1 PE=1 SV=2 - [TP53B_HUMAN]	1	Q12888	S500	Tumor suppressor p53-binding protein 1 (53BP1) (p53-binding protein 1) (p53BP1)	TP53BP1																									Reverse	Class I	tSEIEPkNsPEDLGLSLTGDSck	1	N-Term(Dimethyl:2H(4)); K7(Dimethyl:2H(4)); S9(Phospho); C22(Carbamidomethyl); K23(Dimethyl:2H(4))	86	HCD	27	1	2653.31	2	1327.16	1.04	134.79	11442
LIKREpSGYHENGVVK	1	S(6): 100.0; Y(8): 0.0	352	Q15035	Translocation-associated membrane protein 2 OS=Homo sapiens GN=TRAM2 PE=2 SV=1 - [TRAM2_HUMAN]	1	Q15035	S346	Translocating chain-associated membrane protein 2	TRAM2 KIAA0057																									Reverse	Class I	lIkREsGYHENGVVk	1	N-Term(Dimethyl); K3(Dimethyl); S6(Phospho); K15(Dimethyl)	70	ETD	36	2	1893	3	631.673	2.12	36.81	2486
SSDRRNpSLEGYSR	1	S(1): 0.0; S(2): 0.0; S(7): 100.0; Y(11): 0.0; S(12): 0.0	352	Q8NDT2	Putative RNA-binding protein 15B OS=Homo sapiens GN=RBM15B PE=1 SV=2 - [RB15B_HUMAN]	1	Q8NDT2	S235	Putative RNA-binding protein 15B (One-twenty two protein 3) (HuOTT3) (RNA-binding motif protein 15B)	RBM15B OTT3																									Reverse	Class I	sSDRRNsLEGYSR	1	N-Term(Dimethyl); S7(Phospho)	79	ETD	35	2	1634.73	3	545.581	0.31	42.82	2871
GALHTVpSHEDIRDIR	1	T(5): 0.0; S(7): 100.0	352	Q13136	Liprin-alpha-1 OS=Homo sapiens GN=PPFIA1 PE=1 SV=1 - [LIPA1_HUMAN]	1	Q13136	S763	Liprin-alpha-1 (LAR-interacting protein 1) (LIP-1) (Protein tyrosine phosphatase receptor type f polypeptide-interacting protein alpha-1) (PTPRF-interacting protein alpha-1)	PPFIA1 LIP1																									Reverse	Class I	gALHTVsHEDIRDIR	1	N-Term(Dimethyl); S7(Phospho)	91	ETD	38	1	1826.89	3	609.635	0.03	52.58	3390
SRpSTTELDDYSTNK	1	S(1): 0.0; S(3): 100.0; T(4): 0.0; T(5): 0.0; Y(10): 0.0; S(11): 0.0; T(12): 0.0	352	Q8WWI1	LIM domain only protein 7 OS=Homo sapiens GN=LMO7 PE=1 SV=2 - [LMO7_HUMAN]	1	Q8WWI1	S1423	LIM domain only protein 7 (LMO-7) (F-box only protein 20) (LOMP)	LMO7 FBX20 FBXO20 KIAA0858																									Reverse	Class I	sRsTTELDDYSTNk	1	N-Term(Dimethyl); S3(Phospho); K14(Dimethyl)	84	ETD	28	1	1752.77	3	584.927	-1.87	59.72	4241
KLSSNCSGVEGDVpTDEDEGAEMSQR	1	S(3): 0.0; S(4): 0.0; S(7): 0.0; T(14): 100.0; S(23): 0.0	352	Q9UPR0	Inactive phospholipase C-like protein 2 OS=Homo sapiens GN=PLCL2 PE=2 SV=2 - [PLCL2_HUMAN]	1	Q9UPR0	T584	Inactive phospholipase C-like protein 2 (PLC-L(2)) (PLC-L2) (Phospholipase C-L2) (Phospholipase C-epsilon-2) (PLC-epsilon-2)	PLCL2 KIAA1092 PLCE2																									Reverse	Class I	kLSSNcSGVEGDVtDEDEGAEmSQR	1	K1(Dimethyl:2H(4)); N-Term(Dimethyl:2H(4)); C6(Carbamidomethyl); T14(Phospho); M22(Oxidation)	69	HCD	28	1	2860.27	3	954.094	19.96	67.81	5340
CHpSLGYNFIHK	1	S(3): 100.0; Y(6): 0.0	352	Q86X27	Ras-specific guanine nucleotide-releasing factor RalGPS2 OS=Homo sapiens GN=RALGPS2 PE=1 SV=1 - [RGPS2_HUMAN]	1	Q86X27	S343	Ras-specific guanine nucleotide-releasing factor RalGPS2 (Ral GEF with PH domain and SH3-binding motif 2) (RalA exchange factor RalGPS2)	RALGPS2																									Reverse	Class I	cHsLGYNFIHk	1	N-Term(Dimethyl); C1(Carbamidomethyl); S3(Phospho); K11(Dimethyl)	71	ETD	33	0	1511.68	3	504.566	-1.17	105.91	6280
AEEPPSQLDQDTQVQDMDEGpSDDEEEGQK	1	S(6): 0.0; T(12): 0.0; S(21): 100.0	352	Q15459	Splicing factor 3 subunit 1 OS=Homo sapiens GN=SF3A1 PE=1 SV=1 - [SF3A1_HUMAN]	1	Q15459	S359	Splicing factor 3A subunit 1 (SF3a120) (Spliceosome-associated protein 114) (SAP 114)	SF3A1 SAP114																									Reverse	Class I	aEEPPSQLDQDTQVQDmDEGsDDEEEGQk	1	N-Term(Dimethyl); M17(Oxidation); S21(Phospho); K29(Dimethyl)	78	HCD	13	0	3401.36	3	1134.46	5.26	83.55	6600
AGAPGALpSPSYDGGLHGLQSK	1	S(8): 100.0; S(10): 0.0; Y(11): 0.0; S(20): 0.0	352	P15923	Transcription factor E2-alpha OS=Homo sapiens GN=TCF3 PE=1 SV=1 - [TFE2_HUMAN]	1	P15923	S379	Transcription factor E2-alpha (Class B basic helix-loop-helix protein 21) (bHLHb21) (Immunoglobulin enhancer-binding factor E12/E47) (Immunoglobulin transcription factor 1) (Kappa-E2-binding factor) (Transcription factor 3) (TCF-3) (Transcription factor ITF-1)	TCF3 BHLHB21 E2A ITF1																									Reverse	Class I	aGAPGALsPSYDGGLHGLQSk	1	N-Term(Dimethyl:2H(4)); S8(Phospho); K21(Dimethyl:2H(4))	90	ETD	27	0	2127.06	3	709.69	-7.22	106.31	6887
LVLIRHGEpSAWNLENR	1	S(9): 100.0	352	P18669	Phosphoglycerate mutase 1 OS=Homo sapiens GN=PGAM1 PE=1 SV=2 - [PGAM1_HUMAN]	1	P18669	S14	Phosphoglycerate mutase 1 (EC 3.1.3.13) (EC 5.4.2.1) (EC 5.4.2.4) (BPG-dependent PGAM 1) (Phosphoglycerate mutase isozyme B) (PGAM-B)	PGAM1 PGAMA CDABP0006																									Reverse	Class I	lVLIRHGEsAWNLENR	1	N-Term(Dimethyl); S9(Phospho)	70	ETD	32	1	2015.02	3	672.345	-0.34	122.03	7088
VRVESGYFpSLEK	1	S(5): 0.0; Y(7): 0.0; S(9): 100.0	352	Q6WCQ1	Myosin phosphatase Rho-interacting protein OS=Homo sapiens GN=MPRIP PE=1 SV=2 - [MPRIP_HUMAN]	1	Q6WCQ1	S268	Myosin phosphatase Rho-interacting protein (M-RIP) (Rho-interacting protein 3) (RIP3) (p116Rip)	MPRIP KIAA0864 MRIP RHOIP3																									Reverse	Class I	vRVESGYFsLEk	1	N-Term(Dimethyl:2H(4)); S9(Phospho); K12(Dimethyl:2H(4))	89	ETD	29	1	1557.82	3	519.944	-0.01	116.51	7708
LIVVVAGQPSEVRpSSQFAR	1	S(10): 0.0; S(14): 100.0; S(15): 0.0	352	Q6ZNJ1	Neurobeachin-like protein 2 OS=Homo sapiens GN=NBEAL2 PE=2 SV=2 - [NBEL2_HUMAN]	1	Q6ZNJ1	S2724	Neurobeachin-like protein 2	NBEAL2 KIAA0540 UNQ253/PRO290																									Reverse	Class I	lIVVVAGQPSEVRsSQFAR	1	N-Term(Dimethyl:2H(4)); S14(Phospho)	76	ETD	28	1	2155.16	3	719.058	0.68	122.88	8073
VLLGFSSDEpSDVEASPR	1	S(6): 0.0; S(7): 0.0; S(10): 100.0; S(15): 0.0	351	Q9Y2U8	Inner nuclear membrane protein Man1 OS=Homo sapiens GN=LEMD3 PE=1 SV=2 - [MAN1_HUMAN]	1	Q9Y2U8	S144	Inner nuclear membrane protein Man1 (LEM domain-containing protein 3)	LEMD3 MAN1																									Reverse	Class I	vLLGFSSDEsDVEASPR	1	N-Term(Dimethyl); S10(Phospho)	101	ETD	14	0	1915.87	3	639.295	0.47	138.37	10468
ECTNILEGDESDpSLTDYDIVGGK	1	T(3): 0.0; S(11): 0.0; S(13): 100.0; T(15): 0.0; Y(17): 0.0	351	Q8WXK8	Bullous pemphigoid antigen 1, isoform 7 (Fragment) OS=Homo sapiens GN=DST PE=1 SV=1 - [BPAEB_HUMAN]	1	Q8WXK8	S2203	Replaced by: Q03001 = Dystonin (230 kDa bullous pemphigoid antigen) (230/240 kDa bullous pemphigoid antigen) (Bullous pemphigoid antigen 1) (BPA) (Bullous pemphigoid antigen) (Dystonia musculorum protein) (Hemidesmosomal plaque protein)	DST BP230 BP240 BPAG1 DMH DT KIAA0728																									Reverse	Class I	ecTNILEGDESDsLTDYDIVGGk	1	N-Term(Dimethyl); C2(Carbamidomethyl); S13(Phospho); K23(Dimethyl)	79	HCD	13	0	2666.14	3	889.386	0.79	144.39	11707
KSSPSTGpSLDSGNESK	1	S(2): 0.0; S(3): 0.0; S(5): 0.0; T(6): 0.0; S(8): 100.0; S(11): 0.0; S(15): 0.0	351	Q15057	Centaurin-beta-2 OS=Homo sapiens GN=CENTB2 PE=1 SV=3 - [CENB2_HUMAN]	1	Q15057	S384	Arf-GAP with coiled-coil, ANK repeat and PH domain-containing protein 2 (Centaurin-beta-2) (Cnt-b2)	ACAP2 CENTB2 KIAA0041																									Reverse	Class I	kSSPSTGsLDSGNESk	1	N-Term(Dimethyl); K1(Dimethyl); S8(Phospho); K16(Dimethyl)	93	ETD	29	1	1744.8	3	582.271	-0.34	30.3	2268
NHpSGSRpTPPVALNSSR	2	S(3): 100.0; S(5): 0.0; T(7): 100.0; S(14): 0.0; S(15): 0.0	351	Q9UQ35	Serine/arginine repetitive matrix protein 2 OS=Homo sapiens GN=SRRM2 PE=1 SV=2 - [SRRM2_HUMAN]	1	Q9UQ35	S2100, T2104	Serine/arginine repetitive matrix protein 2 (300 kDa nuclear matrix antigen) (Serine/arginine-rich splicing factor-related nuclear matrix protein of 300 kDa) (SR-related nuclear matrix protein of 300 kDa) (Ser/Arg-related nuclear matrix protein of 300 kDa) (Splicing coactivator subunit SRm300) (Tax-responsive enhancer element-binding protein 803) (TaxREB803)	SRRM2 KIAA0324 SRL300 SRM300 HSPC075																									Reverse	Class I	nHsGSRtPPVALNSSR	1	N-Term(Dimethyl); S3(Phospho); T7(Phospho)	87	ETD	30	1	1867.8	3	623.272	-10.83	49.06	3137
QGQSQAASSSSVTpSPIK	1	S(4): 0.0; S(8): 0.0; S(9): 0.0; S(10): 0.0; S(11): 0.0; T(13): 0.0; S(14): 100.0	351	O60583	Cyclin-T2 OS=Homo sapiens GN=CCNT2 PE=1 SV=2 - [CCNT2_HUMAN]	1	O60583	S480	Cyclin-T2 (CycT2)	CCNT2																									Reverse	Class I	qGQSQAASSSSVTsPIk	1	N-Term(Dimethyl:2H(4)); S14(Phospho); K17(Dimethyl:2H(4))	79	ETD	14	0	1806.91	3	602.974	0.01	52.06	3779
GDVTAEEAAGApSPAK	1	T(4): 0.0; S(12): 100.0	351	P49006	MARCKS-related protein OS=Homo sapiens GN=MARCKSL1 PE=1 SV=2 - [MRP_HUMAN]	1	P49006	S22	MARCKS-related protein (MARCKS-like protein 1) (Macrophage myristoylated alanine-rich C kinase substrate) (Mac-MARCKS) (MacMARCKS)	MARCKSL1 MLP MRP																									Reverse	Class I	gDVTAEEAAGAsPAk	1	N-Term(Dimethyl); S12(Phospho); K15(Dimethyl)	91	HCD	14	0	1509.68	2	755.346	0.37	49.38	3893
EGHETPMDIDpSDDSK	1	T(5): 0.0; S(11): 100.0; S(14): 0.0	351	Q8TDB6	Protein deltex-3-like OS=Homo sapiens GN=DTX3L PE=1 SV=1 - [DTX3L_HUMAN]	1	Q8TDB6	S532	E3 ubiquitin-protein ligase DTX3L (EC 6.3.2.-) (B-lymphoma- and BAL-associated protein) (Protein deltex-3-like) (Rhysin-2) (Rhysin2)	DTX3L BBAP																									Reverse	Class I	eGHETPMDIDsDDSk	1	N-Term(Dimethyl); S11(Phospho); K15(Dimethyl)	63	ETD	28	0	1811.7	3	604.572	-1.38	65.18	4592
STpSFRQGPEESGLGDGTGPK	1	S(1): 0.2; T(2): 0.2; S(3): 99.6; S(11): 0.0; T(17): 0.0	351	Q92614	Myosin-XVIIIa OS=Homo sapiens GN=MYO18A PE=1 SV=3 - [MY18A_HUMAN]	1	Q92614	S728	Unconventional myosin-XVIIIa (Molecule associated with JAK3 N-terminus) (MAJN) (Myosin containing a PDZ domain)	MYO18A KIAA0216 MYSPDZ																									Reverse	Class I	sTsFRQGPEESGLGDGTGPk	1	N-Term(Dimethyl:2H(4)); S3(Phospho); K20(Dimethyl:2H(4))	102	ETD	27	1	2151.02	3	717.679	0.27	76.02	5197
RKpSELPQDVYTIK	1	S(3): 100.0; Y(10): 0.0; T(11): 0.0	351	Q14738	Serine/threonine-protein phosphatase 2A 56 kDa regulatory subunit delta isoform OS=Homo sapiens GN=PPP2R5D PE=1 SV=1 - [2A5D_HUMAN]	1	Q14738	S573	Serine/threonine-protein phosphatase 2A 56 kDa regulatory subunit delta isoform (PP2A B subunit isoform B'-delta) (PP2A B subunit isoform B56-delta) (PP2A B subunit isoform PR61-delta) (PP2A B subunit isoform R5-delta)	PPP2R5D																									Reverse	Class I	rksELPQDVYTIk	1	N-Term(Dimethyl:2H(4)); K2(Dimethyl:2H(4)); S3(Phospho); K13(Dimethyl:2H(4))	54	ETD	32	2	1753.01	3	585.008	1.73	84.91	5225
SSLGQSApSETEEDTVSVSKK	1	S(1): 0.0; S(2): 0.0; S(6): 0.0; S(8): 100.0; T(10): 0.0; T(14): 0.0; S(16): 0.0; S(18): 0.0	351	Q13435	Splicing factor 3B subunit 2 OS=Homo sapiens GN=SF3B2 PE=1 SV=1 - [SF3B2_HUMAN]	1	Q13435	S286	Splicing factor 3B subunit 2 (Pre-mRNA-splicing factor SF3b 145 kDa subunit) (SF3b145) (SF3b150) (Spliceosome-associated protein 145) (SAP 145)	SF3B2 SAP145																									Reverse	Class I	sSLGQSAsETEEDTVSVSkk	1	N-Term(Dimethyl); S8(Phospho); K19(Dimethyl); K20(Dimethyl)	87	ETD	27	1	2233.05	3	745.021	-0.14	79.46	5437
LSGpSRQDLIPSYSLGSNK	1	S(2): 0.0; S(4): 100.0; S(11): 0.0; Y(12): 0.0; S(13): 0.0; S(16): 0.0	351	Q9NQT8	Kinesin-like protein KIF13B OS=Homo sapiens GN=KIF13B PE=1 SV=1 - [KI13B_HUMAN]	1	Q9NQT8	S1391	Kinesin-like protein KIF13B (Kinesin-like protein GAKIN)	KIF13B GAKIN KIAA0639																									Reverse	Class I	lSGsRQDLIPSYSLGSNk	1	N-Term(Dimethyl:2H(4)); S4(Phospho); K18(Dimethyl:2H(4))	73	ETD	27	1	2066.05	3	689.355	-13.5	119.02	7652
GGREGFEpSDTDSEFTFK	1	S(8): 100.0; T(10): 0.0; S(12): 0.0; T(15): 0.0	351	Q8WWI1	LIM domain only protein 7 OS=Homo sapiens GN=LMO7 PE=1 SV=2 - [LMO7_HUMAN]	1	Q8WWI1	S276	LIM domain only protein 7 (LMO-7) (F-box only protein 20) (LOMP)	LMO7 FBX20 FBXO20 KIAA0858																									Reverse	Class I	gGREGFEsDTDSEFTFk	1	N-Term(Dimethyl); S8(Phospho); K17(Dimethyl)	80	ETD	28	1	2044.84	3	682.285	-6.23	121.07	7872
VQVAALQApSPPLDQDDR	1	S(9): 100.0	351	Q9UDY2	Tight junction protein ZO-2 OS=Homo sapiens GN=TJP2 PE=1 SV=1 - [ZO2_HUMAN]	1	Q9UDY2	S130	Tight junction protein ZO-2 (Tight junction protein 2) (Zona occludens protein 2) (Zonula occludens protein 2)	TJP2 X104 ZO2																									Reverse	Class I	vQVAALQAsPPLDQDDR	1	N-Term(Dimethyl); S9(Phospho)	74	ETD	14	0	1930.93	3	644.315	1.46	114.66	8698
SLpSDVEEEEAPEDLYK	1	S(1): 0.2; S(3): 99.8; Y(15): 0.0	350	P35968	Vascular endothelial growth factor receptor 2 OS=Homo sapiens GN=KDR PE=1 SV=2 - [VGFR2_HUMAN]	1	P35968	S984	Vascular endothelial growth factor receptor 2 (VEGFR-2) (EC 2.7.10.1) (Fetal liver kinase 1) (FLK-1) (Kinase insert domain receptor) (KDR) (Protein-tyrosine kinase receptor flk-1) (CD antigen CD309)	KDR FLK1 VEGFR2																									Reverse	Class I	sLsDVEEEEAPEDLYk	1	N-Term(Dimethyl); S3(Phospho); K16(Dimethyl)	78	HCD	13	0	1988.86	2	994.935	-0.18	139.36	11248
RFpSADEQFFSVGQAASSSAHSSK	1	S(3): 100.0; S(10): 0.0; S(16): 0.0; S(17): 0.0; S(18): 0.0; S(21): 0.0; S(22): 0.0	350	P46019	Phosphorylase b kinase regulatory subunit alpha, liver isoform OS=Homo sapiens GN=PHKA2 PE=1 SV=1 - [KPB2_HUMAN]	1	P46019	S1015	Phosphorylase b kinase regulatory subunit alpha, liver isoform (Phosphorylase kinase alpha L subunit)	PHKA2 PHKLA PYK																									Reverse	Class I	rFsADEQFFSVGQAASSSAHSSk	1	N-Term(Dimethyl); S3(Phospho); K23(Dimethyl)	55	HCD	31	1	2567.15	3	856.39	-0.82	135.82	11681
EAARpSPDKPGGSPSASR	1	S(5): 100.0; S(12): 0.0; S(14): 0.0; S(16): 0.0	350	Q9Y3T9	Nucleolar complex protein 2 homolog OS=Homo sapiens GN=NOC2L PE=1 SV=3 - [NOC2L_HUMAN]	1	Q9Y3T9	S49	Nucleolar complex protein 2 homolog (Protein NOC2 homolog) (NOC2-like protein) (Novel INHAT repressor)	NOC2L NIR																									Reverse	Class I	eAARsPDkPGGSPSASR	1	N-Term(Dimethyl); S5(Phospho); K8(Dimethyl)	69	ETD	32	1	1805.86	3	602.624	0.99	25.68	1978
VTSTQQQTRIpSASSATR	1	T(2): 0.0; S(3): 0.0; T(4): 0.0; T(8): 0.0; S(11): 100.0; S(13): 0.0; S(14): 0.0; T(16): 0.0	350	P49023	Paxillin OS=Homo sapiens GN=PXN PE=1 SV=2 - [PAXI_HUMAN]	1	P49023	S258	Paxillin	PXN																									Reverse	Class I	vTSTQQQTRIsASSATR	1	N-Term(Dimethyl); S11(Phospho)	90	ETD	28	1	1929.93	3	643.983	-2.42	40.65	2944
RSRLpTPVSPESSSTEEK	1	S(2): 0.0; T(5): 100.0; S(8): 0.0; S(11): 0.0; S(12): 0.0; S(13): 0.0; T(14): 0.0	350	Q13501	Sequestosome-1 OS=Homo sapiens GN=SQSTM1 PE=1 SV=1 - [SQSTM_HUMAN]	1	Q13501	T269	Sequestosome-1 (EBI3-associated protein of 60 kDa) (EBIAP) (p60) (Phosphotyrosine-independent ligand for the Lck SH2 domain of 62 kDa) (Ubiquitin-binding protein p62)	SQSTM1 ORCA OSIL																									Reverse	Class I	rSRLtPVSPESSSTEEk	1	N-Term(Dimethyl:2H(4)); T5(Phospho); K17(Dimethyl:2H(4))	70	ETD	33	2	2034.03	3	678.683	-1.28	48.69	3225
RQGpSFSEDVISHKGDLR	1	S(4): 100.0; S(6): 0.0; S(11): 0.0	350	Q9UPN3;Q96PK2	Microtubule-actin cross-linking factor 1, isoforms 1/2/3/5 OS=Homo sapiens GN=MACF1 PE=1 SV=3 - [MACF1_HUMAN]|Microtubule-actin cross-linking factor 1, isoform 4 OS=Homo sapiens GN=MACF1 PE=1 SV=1 - [MACF4_HUMAN]	2	Q9UPN3	S1860	Microtubule-actin cross-linking factor 1, isoforms 1/2/3/5 (620 kDa actin-binding protein) (ABP620) (Actin cross-linking family protein 7) (Macrophin-1) (Trabeculin-alpha)	MACF1 ABP620 ACF7 KIAA0465 KIAA1251	Q96PK2	S2362	Replaced by: Q9UPN3 = Microtubule-actin cross-linking factor 1, isoforms 1/2/3/5 (620 kDa actin-binding protein) (ABP620) (Actin cross-linking family protein 7) (Macrophin-1) (Trabeculin-alpha)	MACF1 ABP620 ACF7 KIAA0465 KIAA1251																					Reverse	Class I	rQGsFSEDVISHkGDLR	1	N-Term(Dimethyl); S4(Phospho); K13(Dimethyl)	86	ETD	38	2	2067	3	689.672	-0.35	58.95	3733
KRLpSQSDEDVIR	1	S(4): 100.0; S(6): 0.0	350	Q9H7D7	WD repeat-containing protein 26 OS=Homo sapiens GN=WDR26 PE=1 SV=3 - [WDR26_HUMAN]	1	Q9H7D7	S121	WD repeat-containing protein 26 (CUL4- and DDB1-associated WDR protein 2) (Myocardial ischemic preconditioning up-regulated protein 2)	WDR26 CDW2 MIP2 PRO0852																									Reverse	Class I	kRLsQSDEDVIR	1	N-Term(Dimethyl:2H(4)); K1(Dimethyl:2H(4)); S4(Phospho)	66	ETD	34	2	1589.85	3	530.622	0.3	56.51	3776
LKpSEDELRPEVDEHTQK	1	S(3): 100.0; T(15): 0.0	350	Q96D71	RalBP1-associated Eps domain-containing protein 1 OS=Homo sapiens GN=REPS1 PE=1 SV=2 - [REPS1_HUMAN]	1	Q96D71	S657	RalBP1-associated Eps domain-containing protein 1 (RalBP1-interacting protein 1)	REPS1																									Reverse	Class I	lksEDELRPEVDEHTQk	1	N-Term(Dimethyl); K2(Dimethyl); S3(Phospho); K17(Dimethyl)	80	ETD	35	1	2217.08	3	739.698	0.43	64.05	4082
RYpSLGQVSKEER	1	Y(2): 0.0; S(3): 100.0; S(8): 0.0	350	Q14D04	Ventricular zone-expressed PH domain-containing protein homolog 1 OS=Homo sapiens GN=VEPH1 PE=1 SV=1 - [MELT_HUMAN]	1	Q14D04	S430	Ventricular zone-expressed PH domain-containing protein homolog 1 (Protein melted)	VEPH1 KIAA1692 VEPH																									Reverse	Class I	rYsLGQVSkEER	1	N-Term(Dimethyl); S3(Phospho); K9(Dimethyl)	59	ETD	33	2	1587.79	3	529.934	-1.58	79.24	4877
AEEDEILNRpSPR	1	S(10): 100.0	350	P27824	Calnexin OS=Homo sapiens GN=CANX PE=1 SV=2 - [CALX_HUMAN]	1	P27824	S583	Calnexin (IP90) (Major histocompatibility complex class I antigen-binding protein p88) (p90)	CANX																									Reverse	Class I	aEEDEILNRsPR	1	N-Term(Dimethyl); S10(Phospho)	56	ETD	28	1	1536.7	3	512.905	-3.68	70.19	4902
LSQVSDSVSGQpTVVDPK	1	S(2): 0.0; S(5): 0.0; S(7): 0.0; S(9): 0.0; T(12): 100.0	350	O94906	Pre-mRNA-processing factor 6 OS=Homo sapiens GN=PRPF6 PE=1 SV=1 - [PRP6_HUMAN]	1	O94906	T266	Pre-mRNA-processing factor 6 (Androgen receptor N-terminal domain-transactivating protein 1) (ANT-1) (PRP6 homolog) (U5 snRNP-associated 102 kDa protein) (U5-102 kDa protein)	PRPF6 C20orf14																									Reverse	Class I	lSQVSDSVSGQtVVDPk	1	N-Term(Dimethyl); T12(Phospho); K17(Dimethyl)	70	ETD	14	0	1881.92	3	627.978	-0.27	83.48	6379
YSSSGpSPANSFHFK	1	Y(1): 0.0; S(2): 0.0; S(3): 0.0; S(4): 0.0; S(6): 100.0; S(10): 0.0	350	O00418	Elongation factor 2 kinase OS=Homo sapiens GN=EEF2K PE=1 SV=1 - [EF2K_HUMAN]	1	O00418	S74	Eukaryotic elongation factor 2 kinase (eEF-2 kinase) (eEF-2K) (EC 2.7.11.20) (Calcium/calmodulin-dependent eukaryotic elongation factor 2 kinase)	EEF2K																									Reverse	Class I	ySSSGsPANSFHFk	1	N-Term(Dimethyl:2H(4)); S6(Phospho); K14(Dimethyl:2H(4))	69	ETD	29	0	1659.76	3	553.926	-0.4	96.58	6534
RRApSQEANLLTLAQK	1	S(4): 100.0; T(11): 0.0	350	Q6PJG2	Uncharacterized protein C14orf43 OS=Homo sapiens GN=C14orf43 PE=1 SV=2 - [CN043_HUMAN]	1	Q6PJG2	S461	Uncharacterized protein C14orf43	C14orf43 C14orf117																									Reverse	Class I	rRAsQEANLLTLAQk	1	N-Term(Dimethyl); S4(Phospho); K15(Dimethyl)	107	ETD	34	2	1834.99	3	612.335	0.7	108.06	6841
SLSNpSNPDISGTPTSPDDEVR	1	S(1): 0.0; S(3): 0.0; S(5): 100.0; S(10): 0.0; T(12): 0.0; T(14): 0.0; S(15): 0.0	350	Q96N67	Dedicator of cytokinesis protein 7 OS=Homo sapiens GN=DOCK7 PE=1 SV=4 - [DOCK7_HUMAN]	1	Q96N67	S900	Dedicator of cytokinesis protein 7	DOCK7 KIAA1771																									Reverse	Class I	sLSNsNPDISGTPTSPDDEVR	1	N-Term(Dimethyl:2H(4)); S5(Phospho)	115	HCD	13	0	2300.02	2	1150.51	-1	92.54	7336
SEpSNEDLFGLVPFDEITGSQQQK	1	S(1): 0.4; S(3): 99.6; T(17): 0.0; S(19): 0.0	350	Q9NSY1	BMP-2-inducible protein kinase OS=Homo sapiens GN=BMP2K PE=1 SV=2 - [BMP2K_HUMAN]	1	Q9NSY1	S949	BMP-2-inducible protein kinase (BIKe) (EC 2.7.11.1)	BMP2K BIKE HRIHFB2017																									Reverse	Class I	sEsNEDLFGLVPFDEITGSQQQk	1	N-Term(Dimethyl); S3(Phospho); K23(Dimethyl)	57	HCD	12	0	2704.24	3	902.086	2.16	98.92	7745
AVTKRpSPEAPQPVIAMEEPAVPAPLPK	1	T(3): 0.0; S(6): 100.0	350	P14317	Hematopoietic lineage cell-specific protein OS=Homo sapiens GN=HCLS1 PE=1 SV=1 - [HCLS1_HUMAN]	1	P14317	S275	Hematopoietic lineage cell-specific protein (Hematopoietic cell-specific LYN substrate 1) (LckBP1) (p75)	HCLS1 HS1																									Reverse	Class I	aVTkRsPEAPQPVIAMEEPAVPAPLPk	1	N-Term(Dimethyl:2H(4)); K4(Dimethyl:2H(4)); S6(Phospho); K27(Dimethyl:2H(4))	48	HCD	30	2	2999.67	3	1000.56	-3.38	126.37	7753
AHSLGGLDPAFTpSTEDLNCK	1	S(3): 0.0; T(12): 0.4; S(13): 99.2; T(14): 0.4	350	O60292	Signal-induced proliferation-associated 1-like protein 3 OS=Homo sapiens GN=SIPA1L3 PE=1 SV=3 - [SI1L3_HUMAN]	1	O60292	S401	Signal-induced proliferation-associated 1-like protein 3 (SIPA1-like protein 3) (SPA-1-like protein 3)	SIPA1L3 KIAA0545 SPAL3																									Reverse	Class I	aHSLGGLDPAFTsTEDLNck	1	N-Term(Dimethyl:2H(4)); S13(Phospho); C19(Carbamidomethyl); K20(Dimethyl:2H(4))	63	HCD	29	0	2277.07	3	759.694	-1.02	123.82	8140
FSGWYDADLpSPAGHEEAK	1	S(2): 0.0; Y(5): 0.0; S(10): 100.0	350	P18669	Phosphoglycerate mutase 1 OS=Homo sapiens GN=PGAM1 PE=1 SV=2 - [PGAM1_HUMAN]	1	P18669	S31	Phosphoglycerate mutase 1 (EC 3.1.3.13) (EC 5.4.2.1) (EC 5.4.2.4) (BPG-dependent PGAM 1) (Phosphoglycerate mutase isozyme B) (PGAM-B)	PGAM1 PGAMA CDABP0006																									Reverse	Class I	fSGWYDADLsPAGHEEAk	1	N-Term(Dimethyl:2H(4)); S10(Phospho); K18(Dimethyl:2H(4))	75	ETD	28	0	2123.94	3	708.653	-5.78	131.05	8381
HSpSYPAGTEDDEGMGEEPSPFR	1	S(2): 0.6; S(3): 98.8; Y(4): 0.6; T(8): 0.0; S(19): 0.0	350	Q92934	Bcl2 antagonist of cell death OS=Homo sapiens GN=BAD PE=1 SV=3 - [BAD_HUMAN]	1	Q92934	S75	Bcl2 antagonist of cell death (BAD) (Bcl-2-binding component 6) (Bcl-2-like protein 8) (Bcl2-L-8) (Bcl-XL/Bcl-2-associated death promoter)	BAD BBC6 BCL2L8																									Reverse	Class I	hSsYPAGTEDDEGmGEEPSPFR	1	N-Term(Dimethyl); S3(Phospho); M14(Oxidation)	26	HCD	27	0	2519	3	840.34	13.44	109.16	9003
RpSSTSGDTEEEEEEEVVPFSSDEQK	1	S(2): 97.7; S(3): 0.8; T(4): 0.8; S(5): 0.8; T(8): 0.0; S(20): 0.0; S(21): 0.0	349	O15231	Zinc finger protein 185 OS=Homo sapiens GN=ZNF185 PE=1 SV=2 - [ZN185_HUMAN]	1	O15231	S17	Zinc finger protein 185 (LIM domain protein ZNF185) (P1-A)	ZNF185																									Reverse	Class I	rsSTSGDTEEEEEEEVVPFSSDEQk	1	N-Term(Dimethyl); S2(Phospho); K25(Dimethyl)	50	HCD	27	1	2966.24	3	989.417	2.21	119.39	10083
ELFDDPSpYVNVQNLDK	1	S(7): 0.0; Y(8): 100.0	349	P29353	SHC-transforming protein 1 OS=Homo sapiens GN=SHC1 PE=1 SV=4 - [SHC1_HUMAN]	1	P29353	Y427	SHC-transforming protein 1 (SHC-transforming protein 3) (SHC-transforming protein A) (Src homology 2 domain-containing-transforming protein C1) (SH2 domain protein C1)	SHC1 SHC SHCA																									Reverse	Class I	eLFDDPSyVNVQNLDk	1	N-Term(Dimethyl); Y8(Phospho); K16(Dimethyl)	51	ETD	13	0	2031.93	3	677.982	-0.22	139.1	10158
RASEDTTSGpSPPKK	1	S(3): 0.0; T(6): 0.0; T(7): 0.0; S(8): 0.0; S(10): 100.0	349	Q9BZZ5	Apoptosis inhibitor 5 OS=Homo sapiens GN=API5 PE=1 SV=2 - [API5_HUMAN]	1	Q9BZZ5	S464	Apoptosis inhibitor 5 (API-5) (Antiapoptosis clone 11 protein) (AAC-11) (Cell migration-inducing gene 8 protein) (Fibroblast growth factor 2-interacting factor) (FIF) (Protein XAGL)	API5 MIG8																									Reverse	Class I	rASEDTTSGsPPkk	1	N-Term(Dimethyl); S10(Phospho); K13(Dimethyl); K14(Dimethyl)	69	ETD	33	2	1624.8	3	542.27	0.99	24.59	1865
AVAGVMITApSHNR	1	T(8): 0.0; S(10): 100.0	349	Q6PCE3	Glucose 1,6-bisphosphate synthase OS=Homo sapiens GN=PGM2L1 PE=1 SV=2 - [PGM2L_HUMAN]	1	Q6PCE3	S175	Glucose 1,6-bisphosphate synthase (EC 2.7.1.106) (PMMLP) (Phosphoglucomutase-2-like 1)	PGM2L1 BM32A																									Reverse	Class I	aVAGVmITAsHNR	1	N-Term(Dimethyl); M6(Oxidation); S10(Phospho)	72	ETD	28	0	1450.68	3	484.233	-2.84	62.68	4410
LFpSRDAPGREDNTFK	1	S(3): 100.0; T(13): 0.0	349	P02686	Myelin basic protein OS=Homo sapiens GN=MBP PE=1 SV=3 - [MBP_HUMAN]	1	P02686	S96	Myelin basic protein (MBP) (Myelin A1 protein) (Myelin membrane encephalitogenic protein)	MBP																									Reverse	Class I	lFsRDAPGREDNTFk	1	N-Term(Dimethyl:2H(4)); S3(Phospho); K15(Dimethyl:2H(4))	65	ETD	32	2	1896.95	3	632.987	1.21	84.13	5191
AEEKpSPISINVK	1	S(5): 100.0; S(8): 0.0	349	Q9UK58	Cyclin-L1 OS=Homo sapiens GN=CCNL1 PE=1 SV=1 - [CCNL1_HUMAN]	1	Q9UK58	S352	Cyclin-L1 (Cyclin-L)	CCNL1 BM-001 UNQ530/PRO1073																									Reverse	Class I	aEEksPISINVk	1	N-Term(Dimethyl:2H(4)); K4(Dimethyl:2H(4)); S5(Phospho); K12(Dimethyl:2H(4))	70	ETD	28	1	1490.86	3	497.625	-1.52	77.3	5397
QDRGEFSApSPMLK	1	S(7): 0.0; S(9): 100.0	349	Q9UQ35	Serine/arginine repetitive matrix protein 2 OS=Homo sapiens GN=SRRM2 PE=1 SV=2 - [SRRM2_HUMAN]	1	Q9UQ35	S1124	Serine/arginine repetitive matrix protein 2 (300 kDa nuclear matrix antigen) (Serine/arginine-rich splicing factor-related nuclear matrix protein of 300 kDa) (SR-related nuclear matrix protein of 300 kDa) (Ser/Arg-related nuclear matrix protein of 300 kDa) (Splicing coactivator subunit SRm300) (Tax-responsive enhancer element-binding protein 803) (TaxREB803)	SRRM2 KIAA0324 SRL300 SRM300 HSPC075																									Reverse	Class I	qDRGEFSAsPMLk	1	N-Term(Dimethyl); S9(Phospho); K13(Dimethyl)	65	ETD	29	1	1601.75	3	534.589	9.04	94.66	5634
EGpSPAPLEPEPGAAQPK	1	S(3): 100.0	349	Q01167	Forkhead box protein K2 OS=Homo sapiens GN=FOXK2 PE=1 SV=3 - [FOXK2_HUMAN]	1	Q01167	S398	Forkhead box protein K2 (Cellular transcription factor ILF-1) (FOXK1) (Interleukin enhancer-binding factor 1)	FOXK2 ILF ILF1																									Reverse	Class I	eGsPAPLEPEPGAAQPk	1	N-Term(Dimethyl:2H(4)); S3(Phospho); K17(Dimethyl:2H(4))	70	HCD	13	0	1818.91	2	909.958	-1.91	80.45	6350
YSSpSGpSPANSFHFK	2	Y(1): 0.0; S(2): 0.0; S(3): 0.0; S(4): 100.0; S(6): 100.0; S(10): 0.0	349	O00418	Elongation factor 2 kinase OS=Homo sapiens GN=EEF2K PE=1 SV=1 - [EF2K_HUMAN]	1	O00418	S72, S74	Eukaryotic elongation factor 2 kinase (eEF-2 kinase) (eEF-2K) (EC 2.7.11.20) (Calcium/calmodulin-dependent eukaryotic elongation factor 2 kinase)	EEF2K																									Reverse	Class I	ySSsGsPANSFHFk	1	N-Term(Dimethyl:2H(4)); S4(Phospho); S6(Phospho); K14(Dimethyl:2H(4))	78	ETD	15	0	1739.73	3	580.582	0.48	120.8	7646
RQVQpSLTCEVDALK	1	S(5): 100.0; T(7): 0.0	349	P08670	Vimentin OS=Homo sapiens GN=VIM PE=1 SV=4 - [VIME_HUMAN]	1	P08670	S325	Vimentin	VIM																									Reverse	Class I	rQVQsLTcEVDALk	1	N-Term(Dimethyl); S5(Phospho); C8(Carbamidomethyl); K14(Dimethyl)	75	ETD	29	1	1782.88	3	594.965	-0.64	118.5	7821
SAFTPATATGSSPpSPVLGQGEK	1	S(1): 0.0; T(4): 0.0; T(7): 0.0; T(9): 0.0; S(11): 0.0; S(12): 0.0; S(14): 100.0	349	Q15811	Intersectin-1 OS=Homo sapiens GN=ITSN1 PE=1 SV=3 - [ITSN1_HUMAN]	1	Q15811	S904	Intersectin-1 (SH3 domain-containing protein 1A) (SH3P17)	ITSN1 ITSN SH3D1A																									Reverse	Class I	sAFTPATATGSSPsPVLGQGEk	1	N-Term(Dimethyl:2H(4)); S14(Phospho); K22(Dimethyl:2H(4))	95	ETD	14	0	2234.12	3	745.378	0.22	104.64	8016
LTQpSWSSQSSFNSLQR	1	T(2): 0.0; S(4): 100.0; S(6): 0.0; S(7): 0.0; S(9): 0.0; S(10): 0.0; S(13): 0.0	349	P14921	Protein C-ets-1 OS=Homo sapiens GN=ETS1 PE=1 SV=1 - [ETS1_HUMAN]	1	P14921	S267	Protein C-ets-1 (p54)	ETS1 EWSR2																									Reverse	Class I	lTQsWSSQSSFNSLQR	1	N-Term(Dimethyl); S4(Phospho)	77	ETD	14	0	1963.89	3	655.301	-1.36	125.58	9471
ATNEpSEDEIPQLVPIGK	1	T(2): 0.0; S(5): 100.0	348	O76021	Ribosomal L1 domain-containing protein 1 OS=Homo sapiens GN=RSL1D1 PE=1 SV=3 - [RL1D1_HUMAN]	1	O76021	S361	Ribosomal L1 domain-containing protein 1 (CATX-11) (Cellular senescence-inhibited gene protein) (Protein PBK1)	RSL1D1 CATX11 CSIG PBK1 L12																									Reverse	Class I	aTNEsEDEIPQLVPIGk	1	N-Term(Dimethyl); S5(Phospho); K17(Dimethyl)	74	ETD	14	0	1975.96	3	659.326	1.03	140.48	10644
QGGVQPQAGDGAQpTPKEEK	1	T(14): 100.0	348	Q9BRZ2	Tripartite motif-containing protein 56 OS=Homo sapiens GN=TRIM56 PE=1 SV=3 - [TRI56_HUMAN]	1	Q9BRZ2	T418	E3 ubiquitin-protein ligase TRIM56 (EC 6.3.2.-) (RING finger protein 109) (Tripartite motif-containing protein 56)	TRIM56 RNF109																									Reverse	Class I	qGGVQPQAGDGAQtPkEEk	1	N-Term(Dimethyl:2H(4)); T14(Phospho); K16(Dimethyl:2H(4)); K19(Dimethyl:2H(4))	87	ETD	27	1	2101.07	3	701.029	0.84	31.65	2244
GYTpSDSEVYTDHGRPGK	1	Y(2): 0.0; T(3): 0.0; S(4): 100.0; S(6): 0.0; Y(9): 0.0; T(10): 0.0	348	Q92538	Golgi-specific brefeldin A-resistance guanine nucleotide exchange factor 1 OS=Homo sapiens GN=GBF1 PE=1 SV=2 - [GBF1_HUMAN]	1	Q92538	S1318	Golgi-specific brefeldin A-resistance guanine nucleotide exchange factor 1 (BFA-resistant GEF 1)	GBF1 KIAA0248																									Reverse	Class I	gYTsDSEVYTDHGRPGk	1	N-Term(Dimethyl:2H(4)); S4(Phospho); K17(Dimethyl:2H(4))	77	ETD	32	0	2012.92	3	671.645	0.82	58.26	3789
TSSVSNPQDSVGpSPCSR	1	T(1): 0.0; S(2): 0.0; S(3): 0.0; S(5): 0.0; S(10): 0.0; S(13): 100.0; S(16): 0.0	348	P49023	Paxillin OS=Homo sapiens GN=PXN PE=1 SV=2 - [PAXI_HUMAN]	1	P49023	S106	Paxillin	PXN																									Reverse	Class I	tSSVSNPQDSVGsPcSR	1	N-Term(Dimethyl); S13(Phospho); C15(Carbamidomethyl)	89	HCD	14	0	1872.78	2	936.894	0.35	53.43	4244
LSRGDpSLKEPTSIAESSR	1	S(2): 0.0; S(6): 100.0; T(11): 0.0; S(12): 0.0; S(16): 0.0; S(17): 0.0	348	Q9C0B5	Probable palmitoyltransferase ZDHHC5 OS=Homo sapiens GN=ZDHHC5 PE=1 SV=2 - [ZDHC5_HUMAN]	1	Q9C0B5	S380	Palmitoyltransferase ZDHHC5 (EC 2.3.1.-) (Zinc finger DHHC domain-containing protein 5) (DHHC-5) (Zinc finger protein 375)	ZDHHC5 KIAA1748 ZNF375																									Reverse	Class I	lSRGDsLkEPTSIAESSR	1	N-Term(Dimethyl); S6(Phospho); K8(Dimethyl)	73	ETD	31	2	2069.03	3	690.348	0.34	73.11	4467
RACApSPSAQVEGSPVAGSDGSQPAVK	1	S(5): 99.2; S(7): 0.8; S(13): 0.0; S(18): 0.0; S(21): 0.0	348	Q9UFC0	Leucine-rich repeat and WD repeat-containing protein 1 OS=Homo sapiens GN=LRWD1 PE=1 SV=2 - [LRWD1_HUMAN]	1	Q9UFC0	S251	Leucine-rich repeat and WD repeat-containing protein 1 (ORC-associated protein) (ORCA) (Origin recognition complex-associated protein)	LRWD1 ORCA																									Reverse	Class I	rAcAsPSAQVEGSPVAGSDGSQPAVk	2	N-Term(Dimethyl); C3(Carbamidomethyl); S5(Phospho); K26(Dimethyl)	48	HCD	28	1	2649.23	3	883.748	-1.3	66.42	4647
HIEDTGpSTPpSIGENDLK	2	T(5): 0.0; S(7): 100.0; T(8): 0.0; S(10): 100.0	348	Q6R327	Rapamycin-insensitive companion of mTOR OS=Homo sapiens GN=RICTOR PE=1 SV=1 - [RICTR_HUMAN]	1	Q6R327	S1174, S1177	Rapamycin-insensitive companion of mTOR (AVO3 homolog) (hAVO3)	RICTOR KIAA1999																									Reverse	Class I	hIEDTGsTPsIGENDLk	1	N-Term(Dimethyl); S7(Phospho); S10(Phospho); K17(Dimethyl)	102	ETD	15	0	2028.86	3	676.958	1.18	93.72	5958
GNAEGSpSDEEGKLVIDEPAK	1	S(6): 0.2; S(7): 99.8	348	P51858	Hepatoma-derived growth factor OS=Homo sapiens GN=HDGF PE=1 SV=1 - [HDGF_HUMAN]	1	P51858	S133	Hepatoma-derived growth factor (HDGF) (High mobility group protein 1-like 2) (HMG-1L2)	HDGF HMG1L2																									Reverse	Class I	gNAEGSsDEEGkLVIDEPAk	1	N-Term(Dimethyl); S7(Phospho); K12(Dimethyl); K20(Dimethyl)	79	ETD	27	1	2209.03	3	737.015	1.2	88	5981
RFPTDYASTpSEDEFGSNR	1	T(4): 0.0; Y(6): 0.0; S(8): 0.0; T(9): 0.1; S(10): 99.9; S(16): 0.0	348	Q5SW79	Centrosomal protein of 170 kDa OS=Homo sapiens GN=CEP170 PE=1 SV=1 - [CE170_HUMAN]	1	Q5SW79	S1241	Centrosomal protein of 170 kDa (Cep170) (KARP-1-binding protein) (KARP1-binding protein)	CEP170 FAM68A KAB KIAA0470																									Reverse	Class I	rFPTDYASTsEDEFGSNR	1	N-Term(Dimethyl:2H(4)); S10(Phospho)	59	ETD	29	1	2190.93	3	730.981	0.56	103.97	6126
EGWKKpSDFQVNLNNASR	1	S(6): 100.0; S(16): 0.0	348	O60716	Catenin delta-1 OS=Homo sapiens GN=CTNND1 PE=1 SV=1 - [CTND1_HUMAN]	1	O60716	S847	Catenin delta-1 (Cadherin-associated Src substrate) (CAS) (p120 catenin) (p120(ctn)) (p120(cas))	CTNND1 KIAA0384																									Reverse	Class I	eGWkksDFQVNLNNASR	1	N-Term(Dimethyl); K4(Dimethyl); K5(Dimethyl); S6(Phospho)	83	ETD	32	2	2157.05	3	719.688	0.22	109.99	6504
HAPSLHGpSTELLPLSR	1	S(4): 0.0; S(8): 96.8; T(9): 3.2; S(15): 0.0	348	Q9H5N1	Rab GTPase-binding effector protein 2 OS=Homo sapiens GN=RABEP2 PE=1 SV=2 - [RABE2_HUMAN]	1	Q9H5N1	S193	Rab GTPase-binding effector protein 2 (Rabaptin-5beta)	RABEP2 RABPT5B																									Reverse	Class I	hAPSLHGsTELLPLSR	1	N-Term(Dimethyl); S8(Phospho)	65	ETD	33	0	1822.92	3	608.312	0.76	110.99	6592
MGSKpSPGNTSQPPAFFSK	1	S(3): 0.0; S(5): 100.0; T(9): 0.0; S(10): 0.0; S(17): 0.0	348	Q9Y618	Nuclear receptor corepressor 2 OS=Homo sapiens GN=NCOR2 PE=1 SV=1 - [NCOR2_HUMAN]	1	Q9Y618	S2261	Nuclear receptor corepressor 2 (N-CoR2) (CTG repeat protein 26) (SMAP270) (Silencing mediator of retinoic acid and thyroid hormone receptor) (SMRT) (T3 receptor-associating factor) (TRAC) (Thyroid-, retinoic-acid-receptor-associated corepressor)	NCOR2 CTG26																									Reverse	Class I	mGSksPGNTSQPPAFFSk	1	M1(Oxidation); N-Term(Dimethyl:2H(4)); K4(Dimethyl:2H(4)); S5(Phospho); K18(Dimethyl:2H(4))	91	ETD	28	1	2060.03	3	687.347	-2.81	101.3	6818
SGQGFHGNSEVNAILpSPR	1	S(1): 0.0; S(9): 0.0; S(16): 100.0	348	Q8TB72	Pumilio homolog 2 OS=Homo sapiens GN=PUM2 PE=1 SV=2 - [PUM2_HUMAN]	1	Q8TB72	S82	Pumilio homolog 2 (Pumilio-2)	PUM2 KIAA0235 PUMH2																									Reverse	Class I	sGQGFHGNSEVNAILsPR	1	N-Term(Dimethyl); S16(Phospho)	88	ETD	29	0	1977.92	3	659.977	-0.85	110.4	7353
RGTGQpSDDSDIWDDTALIK	1	T(3): 0.0; S(6): 100.0; S(9): 0.0; T(15): 0.0	348	Q16637	Survival motor neuron protein OS=Homo sapiens GN=SMN1 PE=1 SV=1 - [SMN_HUMAN]	1	Q16637	S28	Survival motor neuron protein (Component of gems 1) (Gemin-1)	SMN1 SMN SMNT; SMN2 SMNC																									Reverse	Class I	rGTGQsDDSDIWDDTALIk	1	N-Term(Dimethyl); S6(Phospho); K19(Dimethyl)	83	ETD	28	1	2229	3	743.673	-1.52	140.14	9095
ETDLQELFRPFGpSISR	1	T(2): 0.0; S(13): 100.0; S(15): 0.0	348	O75821	Eukaryotic translation initiation factor 3 subunit G OS=Homo sapiens GN=EIF3G PE=1 SV=2 - [EIF3G_HUMAN]	1	O75821	S264	Eukaryotic translation initiation factor 3 subunit G (eIF3g) (Eukaryotic translation initiation factor 3 RNA-binding subunit) (eIF-3 RNA-binding subunit) (Eukaryotic translation initiation factor 3 subunit 4) (eIF-3-delta) (eIF3 p42) (eIF3 p44)	EIF3G EIF3S4																									Reverse	Class I	eTDLQELFRPFGsISR	1	N-Term(Dimethyl); S13(Phospho)	59	ETD	28	0	2002.97	3	668.327	0.98	151.35	9807
QALDYVELSPLTQApSPQR	1	Y(5): 0.0; S(9): 0.0; T(12): 0.0; S(15): 100.0	347	Q9H2D6	TRIO and F-actin-binding protein OS=Homo sapiens GN=TRIOBP PE=1 SV=3 - [TARA_HUMAN]	1	Q9H2D6	S1955	TRIO and F-actin-binding protein (Protein Tara) (Trio-associated repeat on actin)	TRIOBP KIAA1662 TARA HRIHFB2122																									Reverse	Class I	qALDYVELSPLTQAsPQR	1	N-Term(Dimethyl:2H(4)); S15(Phospho)	85	ETD	14	0	2128.06	3	710.026	0.47	141.66	10744
GNGSGGpSRENSTVDFSK	1	S(4): 0.0; S(7): 100.0; S(11): 0.0; T(12): 0.0; S(16): 0.0	347	Q9Y6M7	Sodium bicarbonate cotransporter 3 OS=Homo sapiens GN=SLC4A7 PE=1 SV=1 - [S4A7_HUMAN]	1	Q9Y6M7	S403	Sodium bicarbonate cotransporter 3 (Sodium bicarbonate cotransporter 2) (Sodium bicarbonate cotransporter 2b) (Bicarbonate transporter) (Solute carrier family 4 member 7)	SLC4A7 BT NBC2 NBC2B NBC3 SBC2 SLC4A6																									Reverse	Class I	gNGSGGsRENSTVDFSk	1	N-Term(Dimethyl); S7(Phospho); K17(Dimethyl)	89	ETD	28	1	1834.79	3	612.269	-2.9	56.63	4004
VLGpSEGEEEDEALpSPAK	2	S(4): 100.0; S(14): 100.0	347	P18858	DNA ligase 1 OS=Homo sapiens GN=LIG1 PE=1 SV=1 - [DNL1_HUMAN]	1	P18858	S66, S76	DNA ligase 1 (EC 6.5.1.1) (DNA ligase I) (Polydeoxyribonucleotide synthase [ATP] 1)	LIG1																									Reverse	Class I	vLGsEGEEEDEALsPAk	1	N-Term(Dimethyl); S4(Phospho); S14(Phospho); K17(Dimethyl)	77	ETD	7	0	1975.82	3	659.279	1.47	62.02	4299
AQpSTDSLGTSGSLQSK	1	S(3): 100.0; T(4): 0.0; S(6): 0.0; T(9): 0.0; S(10): 0.0; S(12): 0.0; S(15): 0.0	347	Q15276	Rab GTPase-binding effector protein 1 OS=Homo sapiens GN=RABEP1 PE=1 SV=2 - [RABE1_HUMAN]	1	Q15276	S407	Rab GTPase-binding effector protein 1 (Rabaptin-4) (Rabaptin-5) (Rabaptin-5alpha) (Renal carcinoma antigen NY-REN-17)	RABEP1 RAB5EP RABPT5 RABPT5A																									Reverse	Class I	aQsTDSLGTSGSLQSk	1	N-Term(Dimethyl); S3(Phospho); K16(Dimethyl)	91	ETD	13	0	1702.79	3	568.268	0.37	62.79	4545
ETNLDSLPLVDpTHSK	1	T(2): 0.0; S(6): 0.0; T(12): 100.0; S(14): 0.0	347	P08670	Vimentin OS=Homo sapiens GN=VIM PE=1 SV=4 - [VIME_HUMAN]	1	P08670	T436	Vimentin	VIM																									Reverse	Class I	eTNLDSLPLVDtHSk	1	N-Term(Dimethyl:2H(4)); T12(Phospho); K15(Dimethyl:2H(4))	100	ETD	27	0	1812.91	3	604.975	-7.23	119.73	7691
TEEDSKpSIKpSDVPVYLK	2	T(1): 0.0; S(5): 0.0; S(7): 100.0; S(10): 100.0; Y(15): 0.0	347	Q5SW79	Centrosomal protein of 170 kDa OS=Homo sapiens GN=CEP170 PE=1 SV=1 - [CE170_HUMAN]	1	Q5SW79	S356, S359	Centrosomal protein of 170 kDa (Cep170) (KARP-1-binding protein) (KARP1-binding protein)	CEP170 FAM68A KAB KIAA0470																									Reverse	Class I	tEEDSksIksDVPVYLk	1	N-Term(Dimethyl:2H(4)); K6(Dimethyl:2H(4)); S7(Phospho); K9(Dimethyl:2H(4)); S10(Phospho); K17(Dimethyl:2H(4))	71	ETD	28	2	2226.16	3	742.725	-2.32	118.83	7834
ISSGKSpSPFKVpSPLTFGR	2	S(2): 0.0; S(3): 0.0; S(6): 0.2; S(7): 99.8; S(12): 100.0; T(15): 0.0	347	O95810	Serum deprivation-response protein OS=Homo sapiens GN=SDPR PE=1 SV=3 - [SDPR_HUMAN]	1	O95810	S288, S293	Serum deprivation-response protein (Cavin-2) (PS-p68) (Phosphatidylserine-binding protein)	SDPR																									Reverse	Class I	iSSGkSsPFkVsPLTFGR	1	N-Term(Dimethyl); K5(Dimethyl); S7(Phospho); K10(Dimethyl); S12(Phospho)	64	ETD	29	2	2139.07	3	713.693	0.08	133.99	8772
RHpTLSEVTNQLVVMPGAGK	1	T(3): 100.0; S(5): 0.0; T(8): 0.0	346	Q9H0K1	Serine/threonine-protein kinase SNF1-like kinase 2 OS=Homo sapiens GN=SNF1LK2 PE=1 SV=1 - [SN1L2_HUMAN]	1	Q9H0K1	T484	Serine/threonine-protein kinase SIK2 (EC 2.7.11.1) (Qin-induced kinase) (Salt-inducible kinase 2) (SIK-2) (Serine/threonine-protein kinase SNF1-like kinase 2)	SIK2 KIAA0781 QIK SNF1LK2																									Reverse	Class I	rHtLSEVTNQLVVmPGAGk	1	N-Term(Dimethyl:2H(4)); T3(Phospho); M14(Oxidation); K19(Dimethyl:2H(4))	81	ETD	32	1	2197.16	3	733.06	-0.19	115.79	10118
SSTSGDpTEEEEEEEVVPFSSDEQK	1	S(1): 0.0; S(2): 0.0; T(3): 0.0; S(4): 0.0; T(7): 100.0; S(19): 0.0; S(20): 0.0	346	O15231	Zinc finger protein 185 OS=Homo sapiens GN=ZNF185 PE=1 SV=2 - [ZN185_HUMAN]	1	O15231	T23	Zinc finger protein 185 (LIM domain protein ZNF185) (P1-A)	ZNF185																									Reverse	Class I	sSTSGDtEEEEEEEVVPFSSDEQk	1	N-Term(Dimethyl); T7(Phospho); K24(Dimethyl)	52	HCD	13	0	2810.13	3	937.382	0.65	131.19	10548
RpSPEAPQPVIAMEEPAVPAPLPK	1	S(2): 100.0	346	P14317	Hematopoietic lineage cell-specific protein OS=Homo sapiens GN=HCLS1 PE=1 SV=1 - [HCLS1_HUMAN]	1	P14317	S275	Hematopoietic lineage cell-specific protein (Hematopoietic cell-specific LYN substrate 1) (LckBP1) (p75)	HCLS1 HS1																									Reverse	Class I	rsPEAPQPVIAmEEPAVPAPLPk	1	N-Term(Dimethyl:2H(4)); S2(Phospho); M12(Oxidation); K23(Dimethyl:2H(4))	54	HCD	27	1	2584.36	3	862.126	-2.4	125.91	10654
GLLPGGTQVLDGTSGFpSPAPK	1	T(7): 0.0; T(13): 0.0; S(14): 0.0; S(17): 100.0	346	Q96S94	Cyclin-L2 OS=Homo sapiens GN=CCNL2 PE=1 SV=1 - [CCNL2_HUMAN]	1	Q96S94	S330	Cyclin-L2 (Paneth cell-enhanced expression protein)	CCNL2 SB138																									Reverse	Class I	gLLPGGTQVLDGTSGFsPAPk	1	N-Term(Dimethyl); S17(Phospho); K21(Dimethyl)	111	ETD	14	0	2135.08	3	712.366	2	141.04	10697
AQpSSPASATFPVSVQEPPTKPR	1	S(3): 99.4; S(4): 0.6; S(7): 0.0; T(9): 0.0; S(13): 0.0; T(19): 0.0	346	P56524	Histone deacetylase 4 OS=Homo sapiens GN=HDAC4 PE=1 SV=2 - [HDAC4_HUMAN]	1	P56524	S632	Histone deacetylase 4 (HD4) (EC 3.5.1.98)	HDAC4 KIAA0288																									Reverse	Class I	aQsSPASATFPVSVQEPPTkPR	1	N-Term(Dimethyl:2H(4)); S3(Phospho); K20(Dimethyl:2H(4))	65	HCD	28	0	2426.26	3	809.424	0.66	126.19	10926
RRpSQpSIEQESQEK	2	S(3): 100.0; S(5): 100.0; S(10): 0.0	346	Q5VTL8	Pre-mRNA-splicing factor 38B OS=Homo sapiens GN=PRPF38B PE=1 SV=1 - [PR38B_HUMAN]	1	Q5VTL8	S527, S529	Pre-mRNA-splicing factor 38B (Sarcoma antigen NY-SAR-27)	PRPF38B																									Reverse	Class I	rRsQsIEQESQEk	1	N-Term(Dimethyl:2H(4)); S3(Phospho); S5(Phospho); K13(Dimethyl:2H(4))	74	ETD	30	2	1828.84	3	610.286	-0.11	27.51	1921
KSGSpSPKWTHDK	1	S(2): 0.0; S(4): 0.0; S(5): 100.0; T(9): 0.0	346	Q9NYF8	Bcl-2-associated transcription factor 1 OS=Homo sapiens GN=BCLAF1 PE=1 SV=2 - [BCLF1_HUMAN]	1	Q9NYF8	S884	Bcl-2-associated transcription factor 1 (Btf)	BCLAF1 BTF KIAA0164																									Reverse	Class I	kSGSsPkWTHDk	1	K1(Dimethyl); N-Term(Dimethyl); S5(Phospho); K7(Dimethyl); K12(Dimethyl)	69	ETD	39	2	1549.78	3	517.264	0.53	29.45	2174
KTEVVMNSQQpTPVGpTPK	2	T(2): 0.0; S(8): 0.0; T(11): 100.0; T(15): 100.0	346	O75781	Paralemmin OS=Homo sapiens GN=PALM PE=1 SV=2 - [PALM_HUMAN]	1	O75781	T141, T145	Paralemmin-1 (Paralemmin)	PALM KIAA0270																									Reverse	Class I	kTEVVmNSQQtPVGtPk	1	K1(Dimethyl:2H(4)); N-Term(Dimethyl:2H(4)); M6(Oxidation); T11(Phospho); T15(Phospho); K17(Dimethyl:2H(4))	86	ETD	21-24	1	2116.06	3	706.024	0.83	34.55	2525
EMEDKVTpSPEKAEEAK	1	T(7): 0.0; S(8): 100.0	346	P56211	cAMP-regulated phosphoprotein 19 OS=Homo sapiens GN=ARPP19 PE=1 SV=2 - [ARP19_HUMAN]	1	P56211	S23	cAMP-regulated phosphoprotein 19 (ARPP-19)	ARPP19																									Reverse	Class I	emEDkVTsPEkAEEAk	1	N-Term(Dimethyl); M2(Oxidation); K5(Dimethyl); S8(Phospho); K11(Dimethyl); K16(Dimethyl)	72	ETD	30	2	2028.94	3	676.985	-2.07	38.93	2712
[truncated: 13,305 more rows]
[truncated: 1 more columns]

## Sheet: Class II Phosphopeptides Rev
Sequence	# of Phospho-sites	pRS Site Probabilities	pRS Score	Protein Group Accessions	Protein Descriptions	# of Protein Groups	Acc. # 1	Sites Acc. # 1	Protein Names Acc. # 1	Gene Names Acc. # 1	Experiment Identified	Class Type	Sequence (MASCOT)	Search Engine Rank (MASCOT)	Modifications (MASCOT)	IonScore (MASCOT)	Activation Type	Fraction # Identified	# of Missed Cleavages	MH+ [Da]	Charge	m/z [Da]	ΔM [ppm]	RT [min]	Scan #	Spectrum File
[truncated: 4,555 more rows]
