# Supplementary material for: Quantitative global phosphoproteomics of human umbilical vein endothelial cells after activation of the Rap signaling pathway
Source: Royal Society of Chemistry journal article supplement (doi:10.1039/c3mb25524g), 2013-01-21
Supplement: c3mb25524g_7.xlsx [file c3mb25524g_7.xlsx]

## Sheet: Co-Quant. Class I Phosphosites
Protein Group Accessions	# of Protein Groups	Protein Descriptions	Acc. # 1	Sites Acc. # 1	Protein Names Acc. # 1	Gene Names Acc. # 1	Phosposite Sequence Context	Ratio (Medium/Light) Forward	Ratio (Light/Medium) Reverse	Log2 Ratio (Medium/Light) Forward	Log2 Ratio (Light/Medium) Reverse	Normalized Ratio (Medium/Light) Forward	Normalized Ratio (Light/Medium) Reverse	Normalized Log2 Ratio (Medium/Light) Forward	Normalized Log2 Ratio (Light/Medium) Reverse	Intensity Light Forward	Intensity Light Reverse	Intensity Medium Forward	Intensity Medium Reverse	Intensity (Light+Medium) Forward	Intensity (Light+Medium) Reverse	Log10 Intensity (Light+Medium) Forward	Log10 Intensity (Light+Medium) Reverse	Quan Result ID Forward	Quan Result ID Reverse	Predicted Kinase Group/Family/Subfamily	Predicted Kinases	Acc. # 2	Sites Acc. # 2	Protein Names Acc. # 2	Gene Names Acc. # 2	Acc. # 3	Sites Acc. # 3	Protein Names Acc. # 3	Gene Names Acc. # 3	Acc. # 4	Sites Acc. # 4	Protein Names Acc. # 4	Gene Names Acc. # 4	Acc. # 5	Sites Acc. # 5	Protein Names Acc. # 5	Gene Names Acc. # 5	Acc. # 6	Sites Acc. # 6	Protein Names Acc. # 6	Gene Names Acc. # 6	Acc. # 7	Sites Acc. # 7
A0JLT2	1	Mediator of RNA polymerase II transcription subunit 19 OS=Homo sapiens GN=MED19 PE=1 SV=2 - [MED19_HUMAN]	A0JLT2	S194	Mediator of RNA polymerase II transcription subunit 19 (Lung cancer metastasis-related protein 1) (Mediator complex subunit 19)	MED19 LCMR1	PVPPETPSDSDHKKK	1.131	1.58983	0.177599	0.668868	1.14474	1.42289	0.195016	0.508828	25400000	12100000	28700000	7620000	54100000	19720000	7.7332	7.29491	74718	47035
A0JNW5	1	UHRF1-binding protein 1-like OS=Homo sapiens GN=UHRF1BP1L PE=1 SV=2 - [UH1BL_HUMAN]	A0JNW5	S989	UHRF1-binding protein 1-like	UHRF1BP1L KIAA0701	GLVYKSGSGEIGSET	0.983	1.04167	-0.0247367	0.0588937	0.994939	0.932292	-0.00731963	-0.101147	19200000	882000	18900000	847000	38100000	1729000	7.58092	6.23779	34941	129183
A0MZ66	1	Shootin-1 OS=Homo sapiens GN=KIAA1598 PE=1 SV=3 - [SHOT1_HUMAN]	A0MZ66	S506	Shootin-1	KIAA1598	LATSESKSMPVLGSV	1.326	1.40647	0.407081	0.492079	1.34211	1.25879	0.424498	0.332038	14000000	105000000	18600000	74700000	32600000	179700000	7.51322	8.25455	68284	18541
A1A4S6	1	Rho GTPase-activating protein 10 OS=Homo sapiens GN=ARHGAP10 PE=1 SV=1 - [RHG10_HUMAN]	A1A4S6	S591	Rho GTPase-activating protein 10 (GTPase regulator associated with focal adhesion kinase 2) (Graf-related protein 2) (Rho-type GTPase-activating protein 10)	ARHGAP10 GRAF2	EPTCLSASPPNAPPR	1.163	3.41297	0.217851	1.77103	1.17713	3.05461	0.235268	1.61099	11300000	76300000	13200000	22300000	24500000	98600000	7.38917	7.99388	71798	29147
A1L170	1	Uncharacterized protein FLJ13137 OS=Homo sapiens PE=1 SV=1 - [YA022_HUMAN]	A1L170	S223	Uncharacterized protein C1orf226	C1orf226	TECRRASSPSLIERN	1.058	0.977517	0.0813396	-0.0328061	1.07085	0.874878	0.0987567	-0.192847	41800000	21000000	44200000	21500000	86000000	42500000	7.9345	7.62839	4138	26827
A1L390	1	Pleckstrin homology domain-containing family G member 3 OS=Homo sapiens GN=PLEKHG3 PE=1 SV=1 - [PKHG3_HUMAN]	A1L390	S76	Pleckstrin homology domain-containing family G member 3 (PH domain-containing family G member 3)	PLEKHG3 KIAA0599	LNVKGPLSPFNSRAA	0.85	0.84317	-0.234465	-0.246104	0.860324	0.754637	-0.217048	-0.406144	20300000	16200000	17300000	19200000	37600000	35400000	7.57519	7.549	5308	28346
A2RRP1	1	Neuroblastoma-amplified gene protein OS=Homo sapiens GN=NAG PE=1 SV=1 - [NAG_HUMAN]	A2RRP1	S473	Neuroblastoma-amplified sequence (Neuroblastoma-amplified gene protein)	NBAS NAG	EDEGEEDSDSDYEIS	1.135	1.03093	0.182692	0.0439433	1.14879	0.92268	0.200109	-0.116097	139000000	92200000	158000000	89500000	297000000	181700000	8.47276	8.25935	66704	17454
A2RRP1	1	Neuroblastoma-amplified gene protein OS=Homo sapiens GN=NAG PE=1 SV=1 - [NAG_HUMAN]	A2RRP1	S475	Neuroblastoma-amplified sequence (Neuroblastoma-amplified gene protein)	NBAS NAG	EGEEDSDSDYEISAK	0.98	1.05932	-0.0291463	0.0831412	0.991903	0.948093	-0.0117293	-0.0768992	89300000	89100000	87500000	84100000	176800000	173200000	8.24748	8.23855	100489	103628
A2RUS2	1	DENN domain-containing protein 3 OS=Homo sapiens GN=DENND3 PE=2 SV=2 - [DEND3_HUMAN]	A2RUS2	S490	DENN domain-containing protein 3	DENND3 KIAA0870	ELAPRNSSLRLTDTA	0.774	0.853971	-0.369595	-0.227741	0.783401	0.764304	-0.352177	-0.387781	6820000	7610000	5280000	8910000	12100000	16520000	7.08279	7.21801	82298	60444
A3KN83	1	Protein strawberry notch homolog 1 OS=Homo sapiens GN=SBNO1 PE=1 SV=1 - [SBNO1_HUMAN]	A3KN83	S212	Protein strawberry notch homolog 1 (Monocyte protein 3) (MOP-3)	SBNO1 MOP3	INDMKMRSFSPTMKV	0.449	1.17233	-1.15521	0.229382	0.454453	1.04924	-1.1378	0.0693419	28800000	58100000	12900000	49600000	41700000	107700000	7.62014	8.03222	3520	23249
A3KN83	1	Protein strawberry notch homolog 1 OS=Homo sapiens GN=SBNO1 PE=1 SV=1 - [SBNO1_HUMAN]	A3KN83	S214	Protein strawberry notch homolog 1 (Monocyte protein 3) (MOP-3)	SBNO1 MOP3	DMKMRSFSPTMKVPV	0.831	1.17233	-0.26708	0.229382	0.841093	1.04924	-0.249663	0.0693419	16200000	58100000	13400000	49600000	29600000	107700000	7.47129	8.03222	4425	23249
A6ND36	1	Protein FAM83G OS=Homo sapiens GN=FAM83G PE=1 SV=2 - [FA83G_HUMAN]	A6ND36	S760	Protein FAM83G	FAM83G	RLLPDPGSPRLAQNA	0.442	0.576369	-1.17788	-0.794936	0.447368	0.51585	-1.16046	-0.954976	6640000	8310000	2940000	14400000	9580000	22710000	6.98137	7.35622	105108	23277
A6NFI3	1	Zinc finger protein 316 OS=Homo sapiens GN=ZNF316 PE=3 SV=1 - [ZN316_HUMAN]	A6NFI3	S112	Zinc finger protein 316	ZNF316	SRGGDAKSPVLQEKG	1.031	1.02987	0.0440443	0.0424568	1.04352	0.92173	0.0614614	-0.117584	18800000	13700000	19400000	13300000	38200000	27000000	7.58206	7.43136	77648	50665
A6NJ09	1	Putative RUNDC2-like protein 2 OS=Homo sapiens PE=4 SV=2 - [RUN2M_HUMAN]	A6NJ09	S191	Deleted	Deleted	YQKLDVKSIDDEDVD	0.972	1.30039	-0.0409718	0.378944	0.983806	1.16385	-0.0235547	0.218904	28000000	17300000	27300000	13300000	55300000	30600000	7.74273	7.48572	43774	140384
A6NKD9	1	Coiled-coil domain-containing protein 85C OS=Homo sapiens GN=CCDC85C PE=3 SV=1 - [CC85C_HUMAN]	A6NKD9	S246	Coiled-coil domain-containing protein 85C	CCDC85C	KAGATRRSLDDLSAP	1.037	1.23001	0.0524159	0.298673	1.0496	1.10086	0.0698329	0.138632	40700000	55000000	42200000	44700000	82900000	99700000	7.91855	7.9987	50405	169329
A6NKD9	1	Coiled-coil domain-containing protein 85C OS=Homo sapiens GN=CCDC85C PE=3 SV=1 - [CC85C_HUMAN]	A6NKD9	S258	Coiled-coil domain-containing protein 85C	CCDC85C	SAPPHHRSIPNGLHD	1.045	0.940734	0.0635029	-0.0881416	1.05769	0.841957	0.08092	-0.248182	26800000	8360000	28000000	8880000	54800000	17240000	7.73878	7.23654	34117	135698
A7KAX9	1	Rho/Cdc42/Rac GTPase-activating protein RICS OS=Homo sapiens GN=RICS PE=1 SV=1 - [RICS_HUMAN]	A7KAX9	S587	Rho GTPase-activating protein 32 (Brain-specific Rho GTPase-activating protein) (GAB-associated Cdc42/Rac GTPase-activating protein) (GC-GAP) (GTPase regulator interacting with TrkA) (Rho-type GTPase-activating protein 32) (Rho/Cdc42/Rac GTPase-activating protein RICS) (RhoGAP involved in the beta-catenin-N-cadherin and NMDA receptor signaling) (p200RhoGAP) (p250GAP)	ARHGAP32 GRIT KIAA0712 RICS	ASLSRPKSLLVSSPS	2.005	1.94932	1.0036	0.962969	2.02935	1.74464	1.02102	0.802929	380000	3160000	763000	1620000	1143000	4780000	6.05805	6.67943	25158	17936
A7KAX9	1	Rho/Cdc42/Rac GTPase-activating protein RICS OS=Homo sapiens GN=RICS PE=1 SV=1 - [RICS_HUMAN]	A7KAX9	S706	Rho GTPase-activating protein 32 (Brain-specific Rho GTPase-activating protein) (GAB-associated Cdc42/Rac GTPase-activating protein) (GC-GAP) (GTPase regulator interacting with TrkA) (Rho-type GTPase-activating protein 32) (Rho/Cdc42/Rac GTPase-activating protein RICS) (RhoGAP involved in the beta-catenin-N-cadherin and NMDA receptor signaling) (p200RhoGAP) (p250GAP)	ARHGAP32 GRIT KIAA0712 RICS	GTLRSAKSEESLTSL	0.868	1.11359	-0.204233	0.155213	0.878543	0.996659	-0.186816	-0.00482776	18100000	7680000	15700000	6890000	33800000	14570000	7.52892	7.16346	43297	162818
A7KAX9	1	Rho/Cdc42/Rac GTPase-activating protein RICS OS=Homo sapiens GN=RICS PE=1 SV=1 - [RICS_HUMAN]	A7KAX9	S892	Rho GTPase-activating protein 32 (Brain-specific Rho GTPase-activating protein) (GAB-associated Cdc42/Rac GTPase-activating protein) (GC-GAP) (GTPase regulator interacting with TrkA) (Rho-type GTPase-activating protein 32) (Rho/Cdc42/Rac GTPase-activating protein RICS) (RhoGAP involved in the beta-catenin-N-cadherin and NMDA receptor signaling) (p200RhoGAP) (p250GAP)	ARHGAP32 GRIT KIAA0712 RICS	EKVVYAFSPKIGRKL	0.856	0.96432	-0.224317	-0.0524159	0.866397	0.863067	-0.2069	-0.212456	9560000	36700000	8180000	38100000	17740000	74800000	7.24895	7.8739	106081	28254
A8CG34	1	Nuclear envelope pore membrane protein POM 121C OS=Homo sapiens GN=POM121C PE=1 SV=2 - [P121C_HUMAN]	A8CG34	S370	Nuclear envelope pore membrane protein POM 121C (Nuclear pore membrane protein 121-2) (POM121-2) (Pore membrane protein of 121 kDa C)	POM121C	NKRSRSSSMSSLTGA	1.675	0.744048	0.744161	-0.426533	1.69534	0.665923	0.761578	-0.586574	792000	472000	1330000	634000	2122000	1106000	6.32675	6.04376	67971	100863
A8CG34	1	Nuclear envelope pore membrane protein POM 121C OS=Homo sapiens GN=POM121C PE=1 SV=2 - [P121C_HUMAN]	A8CG34	S373	Nuclear envelope pore membrane protein POM 121C (Nuclear pore membrane protein 121-2) (POM121-2) (Pore membrane protein of 121 kDa C)	POM121C	SRSSSMSSLTGAYTS	0.801	1.27551	-0.320126	0.351074	0.810729	1.14158	-0.302709	0.191034	6500000	11500000	5210000	8980000	11710000	20480000	7.06856	7.31133	20927	97047
O00116	1	Alkyldihydroxyacetonephosphate synthase, peroxisomal OS=Homo sapiens GN=AGPS PE=1 SV=1 - [ADAS_HUMAN]	O00116	S65	Alkyldihydroxyacetonephosphate synthase, peroxisomal (Alkyl-DHAP synthase) (EC 2.5.1.26) (Aging-associated gene 5 protein) (Alkylglycerone-phosphate synthase)	AGPS AAG5	CKARRAASAATAAPT	1.023	1.10497	0.0328061	0.14401	1.03543	0.98895	0.0502232	-0.0160301	22900000	43700000	23400000	39600000	46300000	83300000	7.66558	7.92065	100544	17521	Other/IKK	TBK1
O00151	1	PDZ and LIM domain protein 1 OS=Homo sapiens GN=PDLIM1 PE=1 SV=4 - [PDLI1_HUMAN]	O00151	S130	PDZ and LIM domain protein 1 (C-terminal LIM domain protein 1) (Elfin) (LIM domain protein CLP-36)	PDLIM1 CLIM1 CLP36	SAMPFTASPASSTTA	0.942	0.840336	-0.086201	-0.250962	0.953441	0.752101	-0.068784	-0.411002	92300000	174000000	86900000	207000000	179200000	381000000	8.25334	8.58092	104734	26815
O00151	1	PDZ and LIM domain protein 1 OS=Homo sapiens GN=PDLIM1 PE=1 SV=4 - [PDLI1_HUMAN]	O00151	S90	PDZ and LIM domain protein 1 (C-terminal LIM domain protein 1) (Elfin) (LIM domain protein CLP-36)	PDLIM1 CLIM1 CLP36	RSEHKVWSPLVTEEG	0.99	0.960615	-0.0144996	-0.0579701	1.00202	0.85975	0.00291748	-0.21801	108000000	116000000	107000000	120000000	215000000	236000000	8.33244	8.37291	5870	24439
O00159	1	Myosin-Ic OS=Homo sapiens GN=MYO1C PE=1 SV=2 - [MYO1C_HUMAN]	O00159	S373	Unconventional myosin-Ic (Myosin I beta) (MMI-beta) (MMIb)	MYO1C	LASKDVESPSWRSTT	1.045	1.0627	0.0635029	0.0877334	1.05769	0.951116	0.08092	-0.072307	467000000	109000000	488000000	102000000	955000000	211000000	8.98	8.32428	4523	23299
O00159	1	Myosin-Ic OS=Homo sapiens GN=MYO1C PE=1 SV=2 - [MYO1C_HUMAN]	O00159	S375	Unconventional myosin-Ic (Myosin I beta) (MMI-beta) (MMIb)	MYO1C	SKDVESPSWRSTTVL	1.052	1.1274	0.0731347	0.172994	1.06478	1.00902	0.0905518	0.0129536	89300000	121000000	93900000	108000000	183200000	229000000	8.26293	8.35984	105134	27264
O00159	1	Myosin-Ic OS=Homo sapiens GN=MYO1C PE=1 SV=2 - [MYO1C_HUMAN]	O00159	S829	Unconventional myosin-Ic (Myosin I beta) (MMI-beta) (MMIb)	MYO1C	WKYCRSISPEWKQQL	0.943	1.10132	-0.0846703	0.139236	0.954453	0.985683	-0.0672533	-0.0208046	183000000	92400000	172000000	83900000	355000000	176300000	8.55023	8.24625	5101	110199
O00161	1	Synaptosomal-associated protein 23 OS=Homo sapiens GN=SNAP23 PE=1 SV=1 - [SNP23_HUMAN]	O00161	S110	Synaptosomal-associated protein 23 (SNAP-23) (Vesicle-membrane fusion protein SNAP-23)	SNAP23	WGDGGENSPCNVVSK	0.965	1.16414	-0.0513992	0.21927	0.976721	1.04191	-0.0339821	0.0592296	841000000	193000000	811000000	166000000	1652000000	359000000	9.21801	8.55509	5007	23791
O00161	1	Synaptosomal-associated protein 23 OS=Homo sapiens GN=SNAP23 PE=1 SV=1 - [SNP23_HUMAN]	O00161	S20	Synaptosomal-associated protein 23 (SNAP-23) (Vesicle-membrane fusion protein SNAP-23)	SNAP23	AHQITDESLESTRRI	0.516	1.23916	-0.954557	0.309359	0.522267	1.10905	-0.93714	0.149319	115000000	249000000	59200000	201000000	174200000	450000000	8.24105	8.65321	50441	60076	Other/CK2	CK2a2
O00161	1	Synaptosomal-associated protein 23 OS=Homo sapiens GN=SNAP23 PE=1 SV=1 - [SNP23_HUMAN]	O00161	S34	Synaptosomal-associated protein 23 (SNAP-23) (Vesicle-membrane fusion protein SNAP-23)	SNAP23	ILGLAIESQDAGIKT	0.961	1.07527	-0.0573917	0.104697	0.972672	0.962366	-0.0399746	-0.055343	51600000	37500000	49600000	34900000	101200000	72400000	8.00518	7.85974	6402	29868
O00178	1	GTP-binding protein 1 OS=Homo sapiens GN=GTPBP1 PE=1 SV=3 - [GTPB1_HUMAN]	O00178	S25	GTP-binding protein 1 (G-protein 1) (GP-1) (GP1)	GTPBP1	MFAPEPSSPGAARAA	0.997	1.01729	-0.00433459	0.0247367	1.00911	0.910478	0.0130825	-0.135304	231000000	373000000	230000000	366000000	461000000	739000000	8.6637	8.86864	6387	24857
O00178	1	GTP-binding protein 1 OS=Homo sapiens GN=GTPBP1 PE=1 SV=3 - [GTPB1_HUMAN]	O00178	S44	GTP-binding protein 1 (G-protein 1) (GP-1) (GP1)	GTPBP1	RLHGGFDSDCSEDGE	0.897	1.16959	-0.15682	0.226004	0.907895	1.04678	-0.139403	0.0659633	375000000	193000000	336000000	165000000	711000000	358000000	8.85187	8.55388	6364	24837
O00178	1	GTP-binding protein 1 OS=Homo sapiens GN=GTPBP1 PE=1 SV=3 - [GTPB1_HUMAN]	O00178	S47	GTP-binding protein 1 (G-protein 1) (GP-1) (GP1)	GTPBP1	GGFDSDCSEDGEALN	0.897	1.16959	-0.15682	0.226004	0.907895	1.04678	-0.139403	0.0659633	375000000	193000000	336000000	165000000	711000000	358000000	8.85187	8.55388	6364	24837
O00192	1	Armadillo repeat protein deleted in velo-cardio-facial syndrome OS=Homo sapiens GN=ARVCF PE=1 SV=1 - [ARVC_HUMAN]	O00192	S203	Armadillo repeat protein deleted in velo-cardio-facial syndrome	ARVCF	RDSPSYGSLSRGLGM	0.532	0.558971	-0.910502	-0.839153	0.538462	0.500279	-0.893085	-0.999194	432000000	61700000	230000000	110000000	662000000	171700000	8.82086	8.23477	3987	26619
O00192	1	Armadillo repeat protein deleted in velo-cardio-facial syndrome OS=Homo sapiens GN=ARVCF PE=1 SV=1 - [ARVC_HUMAN]	O00192	S343	Armadillo repeat protein deleted in velo-cardio-facial syndrome	ARVCF	LDRLVRRSPSVDSAR	0.841	1.06496	-0.249822	0.0908029	0.851215	0.953142	-0.232405	-0.0692375	41100000	12100000	34600000	11300000	75700000	23400000	7.8791	7.36922	52159	83164
O00192	1	Armadillo repeat protein deleted in velo-cardio-facial syndrome OS=Homo sapiens GN=ARVCF PE=1 SV=1 - [ARVC_HUMAN]	O00192	S915	Armadillo repeat protein deleted in velo-cardio-facial syndrome	ARVCF	ERRPRGASSAGEASE	1.425	1.321	0.510962	0.401635	1.44231	1.1823	0.528379	0.241594	17400000	10800000	24800000	8140000	42200000	18940000	7.62531	7.27738	32447	123635
O00192	1	Armadillo repeat protein deleted in velo-cardio-facial syndrome OS=Homo sapiens GN=ARVCF PE=1 SV=1 - [ARVC_HUMAN]	O00192	T642	Armadillo repeat protein deleted in velo-cardio-facial syndrome	ARVCF	EMDRNFDTLDLPKRT	0.97	1.08108	-0.0439433	0.112475	0.981781	0.967568	-0.0265263	-0.0475657	99100000	163000000	96100000	150000000	195200000	313000000	8.29048	8.49554	76906	125866
O00192	1	Armadillo repeat protein deleted in velo-cardio-facial syndrome OS=Homo sapiens GN=ARVCF PE=1 SV=1 - [ARVC_HUMAN]	O00192	T872	Armadillo repeat protein deleted in velo-cardio-facial syndrome	ARVCF	PGGFDDSTLPLVDKS	0.774	0.997009	-0.369595	-0.00432161	0.783401	0.892323	-0.352177	-0.164362	102000000	92100000	79100000	92400000	181100000	184500000	8.25792	8.266	6432	30117
O00193	1	Small acidic protein OS=Homo sapiens GN=SMAP PE=1 SV=1 - [SMAP_HUMAN]	O00193	S17	Small acidic protein	SMAP C11orf58	HGVKRSASPDDDLGS	0.892	1.23001	-0.164884	0.298673	0.902834	1.10086	-0.147467	0.138632	3930000000	1300000000	3510000000	1060000000	7440000000	2360000000	9.87157	9.37291	46377	71703	AGC/AKT	AKT1
O00193	1	Small acidic protein OS=Homo sapiens GN=SMAP PE=1 SV=1 - [SMAP_HUMAN]	O00193	S87	Small acidic protein	SMAP C11orf58	LESQYQQSMDSKLSG	2.181	1.90476	1.12499	0.929611	2.20749	1.70476	1.14241	0.76957	6910000	10800000	15100000	5670000	22010000	16470000	7.34262	7.21669	40123	60425
O00203	1	AP-3 complex subunit beta-1 OS=Homo sapiens GN=AP3B1 PE=1 SV=2 - [AP3B1_HUMAN]	O00203	S276	AP-3 complex subunit beta-1 (Adapter-related protein complex 3 subunit beta-1) (Adaptor protein complex AP-3 subunit beta-1) (Beta-3A-adaptin) (Clathrin assembly protein complex 3 beta-1 large chain)	AP3B1 ADTB3A	NGKNFYESDDDQKEK	1.013	1.14286	0.0186342	0.192645	1.0253	1.02286	0.0360512	0.0326047	1600000000	873000000	1630000000	764000000	3230000000	1637000000	9.5092	9.21405	3997	114730	CK1	CK1a
O00203	1	AP-3 complex subunit beta-1 OS=Homo sapiens GN=AP3B1 PE=1 SV=2 - [AP3B1_HUMAN]	O00203	Y274	AP-3 complex subunit beta-1 (Adapter-related protein complex 3 subunit beta-1) (Adaptor protein complex AP-3 subunit beta-1) (Beta-3A-adaptin) (Clathrin assembly protein complex 3 beta-1 large chain)	AP3B1 ADTB3A	EDNGKNFYESDDDQK	1.013	1.37741	0.0186342	0.461959	1.0253	1.23278	0.0360512	0.301918	1600000000	456000000	1630000000	331000000	3230000000	787000000	9.5092	8.89597	3997	109178	TK/PDGFR	KIT
O00255	1	Menin OS=Homo sapiens GN=MEN1 PE=1 SV=3 - [MEN1_HUMAN]	O00255	S548	Menin	MEN1 SCG2	QVPAPAASPPPEGPV	0.91	1.07759	-0.136062	0.107803	0.921053	0.96444	-0.118644	-0.0522371	19200000	102000000	17500000	94300000	36700000	196300000	7.56467	8.29292	5996	29341	Atypical/PIKK/FRAP	FRAP
O00264	1	Membrane-associated progesterone receptor component 1 OS=Homo sapiens GN=PGRMC1 PE=1 SV=3 - [PGRC1_HUMAN]	O00264	S181	Membrane-associated progesterone receptor component 1 (mPR)	PGRMC1 HPR6.6 PGRMC	GEEPTVYSDEEEPKD	0.997	1.07759	-0.00433459	0.107803	1.00911	0.96444	0.0130825	-0.0522371	4330000000	1830000000	4310000000	1690000000	8640000000	3520000000	9.93651	9.54654	32656	47227	Other/CK2	CK2a2
O00264	1	Membrane-associated progesterone receptor component 1 OS=Homo sapiens GN=PGRMC1 PE=1 SV=3 - [PGRC1_HUMAN]	O00264	S54	Membrane-associated progesterone receptor component 1 (mPR)	PGRMC1 HPR6.6 PGRMC	RGDQPAASGDSDDDE	1.313	1.42857	0.392867	0.514573	1.32895	1.27857	0.410284	0.354533	5630000	102000000	7390000	71200000	13020000	173200000	7.11461	8.23855	10287	27344	Other/CK2	CK2a2
O00264	1	Membrane-associated progesterone receptor component 1 OS=Homo sapiens GN=PGRMC1 PE=1 SV=3 - [PGRC1_HUMAN]	O00264	S57	Membrane-associated progesterone receptor component 1 (mPR)	PGRMC1 HPR6.6 PGRMC	QPAASGDSDDDEPPP	0.928	1.31579	-0.107803	0.395929	0.939271	1.17763	-0.0903862	0.235888	914000000	121000000	848000000	92100000	1762000000	213100000	9.24601	8.32858	78807	23709	Other/CK2	CK2a2
O00264	1	Membrane-associated progesterone receptor component 1 OS=Homo sapiens GN=PGRMC1 PE=1 SV=3 - [PGRC1_HUMAN]	O00264	Y180	Membrane-associated progesterone receptor component 1 (mPR)	PGRMC1 HPR6.6 PGRMC	EGEEPTVYSDEEEPK	0.979	1.10988	-0.0306192	0.150401	0.990891	0.993341	-0.0132022	-0.00963942	776000000	359000000	760000000	323000000	1536000000	682000000	9.18639	8.83378	74917	123996	TK/InsR	IRR
O00267	1	Transcription elongation factor SPT5 OS=Homo sapiens GN=SUPT5H PE=1 SV=1 - [SPT5H_HUMAN]	O00267	S666	Transcription elongation factor SPT5 (hSPT5) (DRB sensitivity-inducing factor 160 kDa subunit) (DSIF p160) (DRB sensitivity-inducing factor large subunit) (DSIF large subunit) (Tat-cotransactivator 1 protein) (Tat-CT1 protein)	SUPT5H SPT5 SPT5H	VGGFAPMSPRISSPM	0.838	0.917431	-0.254978	-0.124328	0.848178	0.821101	-0.237561	-0.284369	71700000	185000000	60000000	202000000	131700000	387000000	8.11959	8.58771	103076	20719	CMGC/CDK	CDK7, CDK9
O00267	1	Transcription elongation factor SPT5 OS=Homo sapiens GN=SUPT5H PE=1 SV=1 - [SPT5H_HUMAN]	O00267	T806	Transcription elongation factor SPT5 (hSPT5) (DRB sensitivity-inducing factor 160 kDa subunit) (DSIF p160) (DRB sensitivity-inducing factor large subunit) (DSIF large subunit) (Tat-cotransactivator 1 protein) (Tat-CT1 protein)	SUPT5H SPT5 SPT5H	TPHYGSQTPLHDGSR	1.026	1.22699	0.0370307	0.295128	1.03846	1.09816	0.0544478	0.135088	40400000	22000000	41400000	18000000	81800000	40000000	7.91275	7.60206	91593	168727	CMGC/CDK	CDK7, CDK9
O00273	1	DNA fragmentation factor subunit alpha OS=Homo sapiens GN=DFFA PE=1 SV=1 - [DFFA_HUMAN]	O00273	S315	DNA fragmentation factor subunit alpha (DNA fragmentation factor 45 kDa subunit) (DFF-45) (Inhibitor of CAD) (ICAD)	DFFA DFF1 DFF45 H13	SISASKASPPGDLQN	0.943	1.03413	-0.0846703	0.0484122	0.954453	0.925543	-0.0672533	-0.111628	326000000	302000000	308000000	292000000	634000000	594000000	8.80209	8.77379	36154	51242	CMGC/CDK/CDC2	CDC2
O00308	1	NEDD4-like E3 ubiquitin-protein ligase WWP2 OS=Homo sapiens GN=WWP2 PE=1 SV=2 - [WWP2_HUMAN]	O00308	S211	NEDD4-like E3 ubiquitin-protein ligase WWP2 (EC 6.3.2.-) (Atrophin-1-interacting protein 2) (AIP2) (WW domain-containing protein 2)	WWP2	TPATGEQSPGARSRH	0.859	0.999001	-0.21927	-0.00144197	0.869433	0.894106	-0.201853	-0.161482	240000000	140000000	207000000	140000000	447000000	280000000	8.65031	8.44716	7149	112180
O00401	1	Neural Wiskott-Aldrich syndrome protein OS=Homo sapiens GN=WASL PE=1 SV=2 - [WASL_HUMAN]	O00401	S426	Neural Wiskott-Aldrich syndrome protein (N-WASP)	WASL	LKKVEQNSRPVSCSG	1.027	1.24224	0.0384362	0.312939	1.03947	1.1118	0.0558532	0.152899	6360000	773000	6540000	622000	12900000	1395000	7.11059	6.14457	42172	62294
O00401	1	Neural Wiskott-Aldrich syndrome protein OS=Homo sapiens GN=WASL PE=1 SV=2 - [WASL_HUMAN]	O00401	S430	Neural Wiskott-Aldrich syndrome protein (N-WASP)	WASL	EQNSRPVSCSGRDAL	1.371	1.97239	0.455229	0.979942	1.38765	1.76529	0.472646	0.819902	77200000	51000000	106000000	25900000	183200000	76900000	8.26293	7.88593	52050	83083
O00401	1	Neural Wiskott-Aldrich syndrome protein OS=Homo sapiens GN=WASL PE=1 SV=2 - [WASL_HUMAN]	O00401	Y256	Neural Wiskott-Aldrich syndrome protein (N-WASP)	WASL	RETSKVIYDFIEKTG	1.198	1.0582	0.260628	0.0816138	1.21255	0.94709	0.278045	-0.0784266	9630000	57500000	11500000	54300000	21130000	111800000	7.3249	8.04844	106813	119067
O00418	1	Elongation factor 2 kinase OS=Homo sapiens GN=EEF2K PE=1 SV=1 - [EF2K_HUMAN]	O00418	S18	Eukaryotic elongation factor 2 kinase (eEF-2 kinase) (eEF-2K) (EC 2.7.11.20) (Calcium/calmodulin-dependent eukaryotic elongation factor 2 kinase)	EEF2K	EGVDGGQSPRAGHDG	1.284	1.21212	0.360645	0.277534	1.2996	1.08485	0.378062	0.117494	101000000	31300000	129000000	25800000	230000000	57100000	8.36173	7.75664	3500	22384	CMGC/MAPK	Erk1, Erk2, JNK2, p38a, p38b, p38d, p38g
O00418	1	Elongation factor 2 kinase OS=Homo sapiens GN=EEF2K PE=1 SV=1 - [EF2K_HUMAN]	O00418	S445	Eukaryotic elongation factor 2 kinase (eEF-2 kinase) (eEF-2K) (EC 2.7.11.20) (Calcium/calmodulin-dependent eukaryotic elongation factor 2 kinase)	EEF2K	SGDSGYPSEKRGELD	0.885	1.1976	-0.176251	0.260152	0.895749	1.07186	-0.158834	0.100111	63600000	40800000	56300000	34100000	119900000	74900000	8.07882	7.87448	43012	139474	Other/CK2	CK2a2
O00418	1	Elongation factor 2 kinase OS=Homo sapiens GN=EEF2K PE=1 SV=1 - [EF2K_HUMAN]	O00418	S470	Eukaryotic elongation factor 2 kinase (eEF-2 kinase) (eEF-2K) (EC 2.7.11.20) (Calcium/calmodulin-dependent eukaryotic elongation factor 2 kinase)	EEF2K	YSNRKYESDEDSLGS	0.95	1.10254	-0.0740006	0.140826	0.961538	0.98677	-0.0565835	-0.0192149	45400000	19200000	43100000	17500000	88500000	36700000	7.94694	7.56467	39600	59678	Other/CK2	CK2a2
O00418	1	Elongation factor 2 kinase OS=Homo sapiens GN=EEF2K PE=1 SV=1 - [EF2K_HUMAN]	O00418	S474	Eukaryotic elongation factor 2 kinase (eEF-2 kinase) (eEF-2K) (EC 2.7.11.20) (Calcium/calmodulin-dependent eukaryotic elongation factor 2 kinase)	EEF2K	KYESDEDSLGSSGRV	0.792	1.17371	-0.336428	0.231075	0.801619	1.05047	-0.319011	0.0710343	4420000	8990000	3500000	7660000	7920000	16650000	6.89873	7.22141	12904	143903	Other/CK2	CK2a2
O00418	1	Elongation factor 2 kinase OS=Homo sapiens GN=EEF2K PE=1 SV=1 - [EF2K_HUMAN]	O00418	S72	Eukaryotic elongation factor 2 kinase (eEF-2 kinase) (eEF-2K) (EC 2.7.11.20) (Calcium/calmodulin-dependent eukaryotic elongation factor 2 kinase)	EEF2K	KSERYSSSGSPANSF	0.78	0.788644	-0.358454	-0.342555	0.789474	0.705836	-0.341037	-0.502595	2490000	28100000	1940000	35600000	4430000	63700000	6.6464	7.80414	41191	157521	CMGC/GSK	GSK3A
O00418	1	Elongation factor 2 kinase OS=Homo sapiens GN=EEF2K PE=1 SV=1 - [EF2K_HUMAN]	O00418	S74	Eukaryotic elongation factor 2 kinase (eEF-2 kinase) (eEF-2K) (EC 2.7.11.20) (Calcium/calmodulin-dependent eukaryotic elongation factor 2 kinase)	EEF2K	ERYSSSGSPANSFHF	0.976	0.995025	-0.0350469	-0.0071955	0.987854	0.890547	-0.0176299	-0.167236	17100000	13700000	16700000	13700000	33800000	27400000	7.52892	7.43775	41092	61204	CMGC/CDK/CDC2	CDC2
O00418	1	Elongation factor 2 kinase OS=Homo sapiens GN=EEF2K PE=1 SV=1 - [EF2K_HUMAN]	O00418	T348	Eukaryotic elongation factor 2 kinase (eEF-2 kinase) (eEF-2K) (EC 2.7.11.20) (Calcium/calmodulin-dependent eukaryotic elongation factor 2 kinase)	EEF2K	KLLQSAKTILRGTEE	0.484	0.543478	-1.04692	-0.879706	0.489879	0.486413	-1.0295	-1.03975	15500000	50000000	7490000	91900000	22990000	141900000	7.36154	8.15198	36826	51828
O00423	1	Echinoderm microtubule-associated protein-like 1 OS=Homo sapiens GN=EML1 PE=2 SV=2 - [EMAL1_HUMAN]	O00423	S113	Echinoderm microtubule-associated protein-like 1 (EMAP-1) (HuEMAP-1)	EML1 EMAP1 EMAPL EMAPL1	KPTGSLPSPSGVRKE	0.813	1.23153	-0.298673	0.300448	0.822874	1.10222	-0.281256	0.140408	130000000	89300000	106000000	72500000	236000000	161800000	8.37291	8.20898	47648	165444
O00425	1	Insulin-like growth factor 2 mRNA-binding protein 3 OS=Homo sapiens GN=IGF2BP3 PE=1 SV=1 - [IF2B3_HUMAN]	O00425	T528	Insulin-like growth factor 2 mRNA-binding protein 3 (IGF2 mRNA-binding protein 3) (IMP-3) (IGF-II mRNA-binding protein 3) (KH domain-containing protein overexpressed in cancer) (hKOC) (VICKZ family member 3)	IGF2BP3 IMP3 KOC1 VICKZ3	VVVPRDQTPDENDQV	0.957	1.06045	-0.0634092	0.0846703	0.968623	0.949099	-0.0459921	-0.0753701	11900000	17800000	11400000	16800000	23300000	34600000	7.36736	7.53908	66512	16886
O00429	1	Dynamin-1-like protein OS=Homo sapiens GN=DNM1L PE=1 SV=2 - [DNM1L_HUMAN]	O00429	S616	Dynamin-1-like protein (EC 3.6.5.5) (Dnm1p/Vps1p-like protein) (DVLP) (Dynamin family member proline-rich carboxyl-terminal domain less) (Dymple) (Dynamin-like protein) (Dynamin-like protein 4) (Dynamin-like protein IV) (HdynIV) (Dynamin-related protein 1)	DNM1L DLP1 DRP1	PIPIMPASPQKGHAV	0.909	1.09649	-0.137648	0.132894	0.92004	0.98136	-0.120231	-0.0271461	270000000	425000000	245000000	388000000	515000000	813000000	8.71181	8.91009	36118	60343
O00443	1	Phosphatidylinositol-4-phosphate 3-kinase C2 domain-containing alpha polypeptide OS=Homo sapiens GN=PIK3C2A PE=1 SV=2 - [P3C2A_HUMAN]	O00443	S259	Phosphatidylinositol 4-phosphate 3-kinase C2 domain-containing subunit alpha (PI3K-C2-alpha) (PtdIns-3-kinase C2 subunit alpha) (EC 2.7.1.154) (Phosphoinositide 3-kinase-C2-alpha)	PIK3C2A	KVSNLQVSPKSEDIS	1.2	1.23305	0.263034	0.302226	1.21457	1.10358	0.280451	0.142186	86400000	63200000	104000000	51300000	190400000	114500000	8.27967	8.05881	3839	26440	Atypical/PIKK/FRAP	FRAP
O00443	1	Phosphatidylinositol-4-phosphate 3-kinase C2 domain-containing alpha polypeptide OS=Homo sapiens GN=PIK3C2A PE=1 SV=2 - [P3C2A_HUMAN]	O00443	S336	Phosphatidylinositol 4-phosphate 3-kinase C2 domain-containing subunit alpha (PI3K-C2-alpha) (PtdIns-3-kinase C2 subunit alpha) (EC 2.7.1.154) (Phosphoinositide 3-kinase-C2-alpha)	PIK3C2A	SVATVTRSQSLNIRT	0.553	0.710732	-0.854649	-0.492622	0.559717	0.636105	-0.837232	-0.652663	3330000	52400000	1840000	73800000	5170000	126200000	6.71349	8.10106	536	22791
O00443	1	Phosphatidylinositol-4-phosphate 3-kinase C2 domain-containing alpha polypeptide OS=Homo sapiens GN=PIK3C2A PE=1 SV=2 - [P3C2A_HUMAN]	O00443	S338	Phosphatidylinositol 4-phosphate 3-kinase C2 domain-containing subunit alpha (PI3K-C2-alpha) (PtdIns-3-kinase C2 subunit alpha) (EC 2.7.1.154) (Phosphoinositide 3-kinase-C2-alpha)	PIK3C2A	ATVTRSQSLNIRTTQ	0.72	0.714796	-0.473931	-0.484396	0.728745	0.639743	-0.456514	-0.644436	261000000	139000000	188000000	195000000	449000000	334000000	8.65225	8.52375	3974	114690	AGC/PKC	PKCa, PKCb, PKCz
O00443	1	Phosphatidylinositol-4-phosphate 3-kinase C2 domain-containing alpha polypeptide OS=Homo sapiens GN=PIK3C2A PE=1 SV=2 - [P3C2A_HUMAN]	O00443	S59	Phosphatidylinositol 4-phosphate 3-kinase C2 domain-containing subunit alpha (PI3K-C2-alpha) (PtdIns-3-kinase C2 subunit alpha) (EC 2.7.1.154) (Phosphoinositide 3-kinase-C2-alpha)	PIK3C2A	QRGFELSSSTRKKAQ	1.203	1.39665	0.266637	0.481969	1.21761	1.25	0.284054	0.321928	13500000	27800000	16200000	20000000	29700000	47800000	7.47276	7.67943	105492	27605
O00461	1	Golgi integral membrane protein 4 OS=Homo sapiens GN=GOLIM4 PE=1 SV=1 - [GOLI4_HUMAN]	O00461	Y641	Golgi integral membrane protein 4 (Golgi integral membrane protein, cis) (GIMPc) (Golgi phosphoprotein 4) (Golgi-localized phosphoprotein of 130 kDa) (Golgi phosphoprotein of 130 kDa)	GOLIM4 GIMPC GOLPH4 GPP130	EHNAEETYGENDENT	0.814	1.11732	-0.296899	0.16004	0.823887	1	-0.279482	0	75600000	64400000	61500000	57700000	137100000	122100000	8.13704	8.08672	56810	89264
O00499	1	Myc box-dependent-interacting protein 1 OS=Homo sapiens GN=BIN1 PE=1 SV=1 - [BIN1_HUMAN]	O00499	S296	Myc box-dependent-interacting protein 1 (Amphiphysin II) (Amphiphysin-like protein) (Box-dependent myc-interacting protein 1) (Bridging integrator 1)	BIN1 AMPHL	APAKGNKSPSPPDGS	0.987	0.976562	-0.018878	-0.0342157	0.998988	0.874023	-0.00146096	-0.194256	133000000	147000000	131000000	150000000	264000000	297000000	8.4216	8.47276	36158	51246	CMGC	CLK1
O00499	1	Myc box-dependent-interacting protein 1 OS=Homo sapiens GN=BIN1 PE=1 SV=1 - [BIN1_HUMAN]	O00499	S298	Myc box-dependent-interacting protein 1 (Amphiphysin II) (Amphiphysin-like protein) (Box-dependent myc-interacting protein 1) (Bridging integrator 1)	BIN1 AMPHL	AKGNKSPSPPDGSPA	0.88	0.967118	-0.184425	-0.0482362	0.890688	0.865571	-0.167008	-0.208277	552000000	311000000	486000000	322000000	1038000000	633000000	9.0162	8.8014	36183	51268	CMGC	CLK1
O00499	1	Myc box-dependent-interacting protein 1 OS=Homo sapiens GN=BIN1 PE=1 SV=1 - [BIN1_HUMAN]	O00499	S303	Myc box-dependent-interacting protein 1 (Amphiphysin II) (Amphiphysin-like protein) (Box-dependent myc-interacting protein 1) (Bridging integrator 1)	BIN1 AMPHL	SPSPPDGSPAATPEI	1.054	1.001	0.0758749	0.00144342	1.0668	0.895896	0.0932919	-0.158597	176000000	103000000	185000000	103000000	361000000	206000000	8.55751	8.31387	4139	26883	CMGC	CLK1
O00499	1	Myc box-dependent-interacting protein 1 OS=Homo sapiens GN=BIN1 PE=1 SV=1 - [BIN1_HUMAN]	O00499	S331	Myc box-dependent-interacting protein 1 (Amphiphysin II) (Amphiphysin-like protein) (Box-dependent myc-interacting protein 1) (Bridging integrator 1)	BIN1 AMPHL	PGATLPKSPSQLRKG	0.78	1.13895	-0.358454	0.187707	0.789474	1.01936	-0.341037	0.0276667	259000000	162000000	202000000	143000000	461000000	305000000	8.6637	8.4843	53115	84113	CMGC	CLK1
O00499	1	Myc box-dependent-interacting protein 1 OS=Homo sapiens GN=BIN1 PE=1 SV=1 - [BIN1_HUMAN]	O00499	S333	Myc box-dependent-interacting protein 1 (Amphiphysin II) (Amphiphysin-like protein) (Box-dependent myc-interacting protein 1) (Bridging integrator 1)	BIN1 AMPHL	ATLPKSPSQLRKGPP	0.765	1.15473	-0.386468	0.207561	0.774291	1.03349	-0.369051	0.0475207	578000000	106000000	442000000	91600000	1020000000	197600000	9.0086	8.29579	53429	84254	Atypical/PIKK/DNAPK	DNAPK
O00501	1	Claudin-5 OS=Homo sapiens GN=CLDN5 PE=1 SV=1 - [CLD5_HUMAN]	O00501	T207	Claudin-5 (Transmembrane protein deleted in VCFS) (TMDVCF)	CLDN5 AWAL TMVCF	YSAPRRPTATGDYDK	1.708	2.13675	0.772308	1.09542	1.72874	1.91239	0.789725	0.935379	56100000	86000000	95900000	40300000	152000000	126300000	8.18184	8.1014	49546	77611
O00505	1	Importin subunit alpha-3 OS=Homo sapiens GN=KPNA3 PE=1 SV=2 - [IMA3_HUMAN]	O00505	S56	Importin subunit alpha-3 (Importin alpha Q2) (Qip2) (Karyopherin subunit alpha-3) (SRP1-gamma)	KPNA3 QIP2	RNVPQEESLEDSDVD	0.96	1.14155	-0.0588937	0.190997	0.97166	1.02169	-0.0414766	0.0309568	1080000000	760000000	1040000000	666000000	2120000000	1426000000	9.32634	9.15412	5634	28911	CAMK/PKD	PKD3
O00505	1	Importin subunit alpha-3 OS=Homo sapiens GN=KPNA3 PE=1 SV=2 - [IMA3_HUMAN]	O00505	S60	Importin subunit alpha-3 (Importin alpha Q2) (Qip2) (Karyopherin subunit alpha-3) (SRP1-gamma)	KPNA3 QIP2	QEESLEDSDVDADFK	0.953	1.1655	-0.0694519	0.22095	0.964575	1.04312	-0.0520348	0.06091	2350000000	770000000	2240000000	660000000	4590000000	1430000000	9.66181	9.15534	5806	118507
O00512	1	B-cell CLL/lymphoma 9 protein OS=Homo sapiens GN=BCL9 PE=1 SV=4 - [BCL9_HUMAN]	O00512	S687	B-cell CLL/lymphoma 9 protein (B-cell lymphoma 9 protein) (Bcl-9) (Protein legless homolog)	BCL9	IPVEGPLSPSRGDFP	1.003	1.04167	0.00432161	0.0588937	1.01518	0.932292	0.0217387	-0.101147	19700000	32000000	19800000	30700000	39500000	62700000	7.5966	7.79727	34192	48956	Atypical/PIKK/FRAP	FRAP
O00512	1	B-cell CLL/lymphoma 9 protein OS=Homo sapiens GN=BCL9 PE=1 SV=4 - [BCL9_HUMAN]	O00512	T155	B-cell CLL/lymphoma 9 protein (B-cell lymphoma 9 protein) (Bcl-9) (Protein legless homolog)	BCL9	ATAPRSSTPSHGQTT	0.962	1.07411	-0.0558912	0.103147	0.973684	0.961332	-0.0384741	-0.0568935	96100000	60900000	92500000	56600000	188600000	117500000	8.27554	8.07004	74267	46535	Atypical/PIKK/FRAP	FRAP
O00512	1	B-cell CLL/lymphoma 9 protein OS=Homo sapiens GN=BCL9 PE=1 SV=4 - [BCL9_HUMAN]	O00512	T315	B-cell CLL/lymphoma 9 protein (B-cell lymphoma 9 protein) (Bcl-9) (Protein legless homolog)	BCL9	TPNNRAVTPVSQGSN	0.83	1.24533	-0.268817	0.316528	0.840081	1.11457	-0.2514	0.156488	44000000	29000000	36500000	23300000	80500000	52300000	7.9058	7.7185	3296	22117	Atypical/PIKK/FRAP	FRAP
O00559	1	Receptor-binding cancer antigen expressed on SiSo cells OS=Homo sapiens GN=EBAG9 PE=1 SV=1 - [RCAS1_HUMAN]	O00559	S36	Receptor-binding cancer antigen expressed on SiSo cells (Cancer-associated surface antigen RCAS1) (Estrogen receptor-binding fragment-associated gene 9 protein)	EBAG9 RCAS1	SGRGRKLSGDQITLP	0.99	1.24533	-0.0144996	0.316528	1.00202	1.11457	0.00291748	0.156488	243000000	610000000	240000000	489000000	483000000	1099000000	8.68395	9.041	76707	45617
O00567	1	Nucleolar protein 5A OS=Homo sapiens GN=NOL5A PE=1 SV=4 - [NOL5A_HUMAN]	O00567	S519	Nucleolar protein 56 (Nucleolar protein 5A)	NOP56 NOL5A	FSKEELMSSDLEETA	1.071	1.26743	0.0989585	0.341903	1.08401	1.13435	0.116376	0.181862	56100000	122000000	60100000	96100000	116200000	218100000	8.06521	8.33866	101797	19234	Other/CK2	CK2a2
O00567	1	Nucleolar protein 5A OS=Homo sapiens GN=NOL5A PE=1 SV=4 - [NOL5A_HUMAN]	O00567	S520	Nucleolar protein 56 (Nucleolar protein 5A)	NOP56 NOL5A	SKEELMSSDLEETAG	0.877	1.10619	-0.189351	0.145605	0.887652	0.990044	-0.171934	-0.0144351	181000000	157000000	159000000	142000000	340000000	299000000	8.53148	8.47567	37865	55729	Other/CK2	CK2a2
O00567	1	Nucleolar protein 5A OS=Homo sapiens GN=NOL5A PE=1 SV=4 - [NOL5A_HUMAN]	O00567	S569	Nucleolar protein 56 (Nucleolar protein 5A)	NOP56 NOL5A	FSKEEPVSSGPEEAV	1.06	1.42653	0.0840643	0.512514	1.07287	1.27675	0.101481	0.352473	1550000	18100000	1650000	12700000	3200000	30800000	6.50515	7.48855	27575	37443	Other/CK2	CK2a2
O00567	1	Nucleolar protein 5A OS=Homo sapiens GN=NOL5A PE=1 SV=4 - [NOL5A_HUMAN]	O00567	S570	Nucleolar protein 56 (Nucleolar protein 5A)	NOP56 NOL5A	SKEEPVSSGPEEAVG	1.057	0.985222	0.0799754	-0.0214797	1.06984	0.881773	0.0973924	-0.18152	445000000	239000000	471000000	243000000	916000000	482000000	8.9619	8.68305	36578	51573	Other/CK2	CK2a2
O00571	1	ATP-dependent RNA helicase DDX3X OS=Homo sapiens GN=DDX3X PE=1 SV=3 - [DDX3X_HUMAN]	O00571	S594	ATP-dependent RNA helicase DDX3X (EC 3.6.4.13) (DEAD box protein 3, X-chromosomal) (DEAD box, X isoform) (Helicase-like protein 2) (HLP2)	DDX3X DBX DDX3	RSKSSRFSGGFGARD	0.986	1.02669	-0.0203404	0.0380063	0.997976	0.918891	-0.0029234	-0.122034	28000000	18000000	27700000	17600000	55700000	35600000	7.74586	7.55145	84992	142068
O00571	1	ATP-dependent RNA helicase DDX3X OS=Homo sapiens GN=DDX3X PE=1 SV=3 - [DDX3X_HUMAN]	O00571	S90	ATP-dependent RNA helicase DDX3X (EC 3.6.4.13) (DEAD box protein 3, X-chromosomal) (DEAD box, X isoform) (Helicase-like protein 2) (HLP2)	DDX3X DBX DDX3	SFFSDRGSGSRGRFD	0.97	1.21803	-0.0439433	0.284546	0.981781	1.09013	-0.0265263	0.124505	55100000	13200000	53500000	10800000	108600000	24000000	8.03583	7.38021	40468	142208
O00629	1	Importin subunit alpha-4 OS=Homo sapiens GN=KPNA4 PE=1 SV=1 - [IMA4_HUMAN]	O00629	S60	Importin subunit alpha-4 (Importin alpha Q1) (Qip1) (Karyopherin subunit alpha-4)	KPNA4 QIP1	HEDICEDSDIDGDYR	1.004	1.2285	0.00575927	0.296899	1.01619	1.09951	0.0231763	0.136859	55600000	27300000	55800000	22200000	111400000	49500000	8.04689	7.69461	36925	51889
O00712	1	Nuclear factor 1 B-type OS=Homo sapiens GN=NFIB PE=2 SV=2 - [NFIB_HUMAN]	O00712	S265	Nuclear factor 1 B-type (NF1-B) (Nuclear factor 1/B) (CCAAT-box-binding transcription factor) (CTF) (Nuclear factor I/B) (NF-I/B) (NFI-B) (TGGCA-binding protein)	NFIB	NLQRSLSSPPSSKRP	1.063	0.69541	0.0881416	-0.524064	1.07591	0.622392	0.105559	-0.684104	110000000	50400000	117000000	72500000	227000000	122900000	8.35603	8.08955	103759	108379
O00712	1	Nuclear factor 1 B-type OS=Homo sapiens GN=NFIB PE=2 SV=2 - [NFIB_HUMAN]	O00712	S312	Nuclear factor 1 B-type (NF1-B) (Nuclear factor 1/B) (CCAAT-box-binding transcription factor) (CTF) (Nuclear factor I/B) (NF-I/B) (NFI-B) (TGGCA-binding protein)	NFIB	ERDQDMSSPTTMKKP	0.93	1.38122	-0.104697	0.465938	0.941296	1.23619	-0.0872803	0.305898	106000000	13000000	98500000	9420000	204500000	22420000	8.31069	7.35064	52415	83455
O00712	1	Nuclear factor 1 B-type OS=Homo sapiens GN=NFIB PE=2 SV=2 - [NFIB_HUMAN]	O00712	S328	Nuclear factor 1 B-type (NF1-B) (Nuclear factor 1/B) (CCAAT-box-binding transcription factor) (CTF) (Nuclear factor I/B) (NF-I/B) (NFI-B) (TGGCA-binding protein)	NFIB	KPLFSSASPQDSSPR	0.911	1.27714	-0.134477	0.352916	0.922065	1.14304	-0.11706	0.192875	209000000	273000000	190000000	213000000	399000000	486000000	8.60097	8.68664	50705	169686
O00712	1	Nuclear factor 1 B-type OS=Homo sapiens GN=NFIB PE=2 SV=2 - [NFIB_HUMAN]	O00712	S333	Nuclear factor 1 B-type (NF1-B) (Nuclear factor 1/B) (CCAAT-box-binding transcription factor) (CTF) (Nuclear factor I/B) (NF-I/B) (NFI-B) (TGGCA-binding protein)	NFIB	SASPQDSSPRLSTFP	0.911	1.27714	-0.134477	0.352916	0.922065	1.14304	-0.11706	0.192875	209000000	273000000	190000000	213000000	399000000	486000000	8.60097	8.68664	50705	169686
O14497	1	AT-rich interactive domain-containing protein 1A OS=Homo sapiens GN=ARID1A PE=1 SV=3 - [ARI1A_HUMAN]	O14497	S1184	AT-rich interactive domain-containing protein 1A (ARID domain-containing protein 1A) (B120) (BRG1-associated factor 250) (BAF250) (BRG1-associated factor 250a) (BAF250A) (Osa homolog 1) (hOSA1) (SWI-like protein) (SWI/SNF complex protein p270) (SWI/SNF-related, matrix-associated, actin-dependent regulator of chromatin subfamily F member 1) (hELD)	ARID1A BAF250 BAF250A C1orf4 OSA1 SMARCF1	PGMSRSNSVGIQDAF	1.014	1.25156	0.0200577	0.323733	1.02632	1.12015	0.0374747	0.163692	45500000	40300000	46100000	32200000	91600000	72500000	7.9619	7.86034	68265	101538
O14497	1	AT-rich interactive domain-containing protein 1A OS=Homo sapiens GN=ARID1A PE=1 SV=3 - [ARI1A_HUMAN]	O14497	S1751	AT-rich interactive domain-containing protein 1A (ARID domain-containing protein 1A) (B120) (BRG1-associated factor 250) (BAF250) (BRG1-associated factor 250a) (BAF250A) (Osa homolog 1) (hOSA1) (SWI-like protein) (SWI/SNF complex protein p270) (SWI/SNF-related, matrix-associated, actin-dependent regulator of chromatin subfamily F member 1) (hELD)	ARID1A BAF250 BAF250A C1orf4 OSA1 SMARCF1	LLDPGRFSKVSSPAP	0.893	1.11607	-0.163268	0.158429	0.903846	0.998884	-0.145851	-0.00161105	21100000	19700000	18800000	17700000	39900000	37400000	7.60097	7.57287	37699	52306
O14497	1	AT-rich interactive domain-containing protein 1A OS=Homo sapiens GN=ARID1A PE=1 SV=3 - [ARI1A_HUMAN]	O14497	S1755	AT-rich interactive domain-containing protein 1A (ARID domain-containing protein 1A) (B120) (BRG1-associated factor 250) (BAF250) (BRG1-associated factor 250a) (BAF250A) (Osa homolog 1) (hOSA1) (SWI-like protein) (SWI/SNF complex protein p270) (SWI/SNF-related, matrix-associated, actin-dependent regulator of chromatin subfamily F member 1) (hELD)	ARID1A BAF250 BAF250A C1orf4 OSA1 SMARCF1	GRFSKVSSPAPMEGG	0.249	0.825083	-2.00578	-0.27739	0.252024	0.738449	-1.98837	-0.43743	14100000	4440000	3510000	5390000	17610000	9830000	7.24576	6.99255	68053	24946	CMGC/CDK	CDK4
O14497	1	AT-rich interactive domain-containing protein 1A OS=Homo sapiens GN=ARID1A PE=1 SV=3 - [ARI1A_HUMAN]	O14497	S1944	AT-rich interactive domain-containing protein 1A (ARID domain-containing protein 1A) (B120) (BRG1-associated factor 250) (BAF250) (BRG1-associated factor 250a) (BAF250A) (Osa homolog 1) (hOSA1) (SWI-like protein) (SWI/SNF complex protein p270) (SWI/SNF-related, matrix-associated, actin-dependent regulator of chromatin subfamily F member 1) (hELD)	ARID1A BAF250 BAF250A C1orf4 OSA1 SMARCF1	SKFPFGISPAQSHRN	1.013	0.628931	0.0186342	-0.669027	1.0253	0.562893	0.0360512	-0.829067	2020000	2340000	2050000	3720000	4070000	6060000	6.60959	6.78247	49224	74379	CMGC/CDK	CDK4
O14497	1	AT-rich interactive domain-containing protein 1A OS=Homo sapiens GN=ARID1A PE=1 SV=3 - [ARI1A_HUMAN]	O14497	S363	AT-rich interactive domain-containing protein 1A (ARID domain-containing protein 1A) (B120) (BRG1-associated factor 250) (BAF250) (BRG1-associated factor 250a) (BAF250A) (Osa homolog 1) (hOSA1) (SWI-like protein) (SWI/SNF complex protein p270) (SWI/SNF-related, matrix-associated, actin-dependent regulator of chromatin subfamily F member 1) (hELD)	ARID1A BAF250 BAF250A C1orf4 OSA1 SMARCF1	RSHHAPMSPGSSGGG	0.802	1.51515	-0.318326	0.599462	0.811741	1.35606	-0.300909	0.439422	149000000	85500000	120000000	56400000	269000000	141900000	8.42975	8.15198	54541	85576	CMGC/CDK	CDK4
O14497	1	AT-rich interactive domain-containing protein 1A OS=Homo sapiens GN=ARID1A PE=1 SV=3 - [ARI1A_HUMAN]	O14497	S382	AT-rich interactive domain-containing protein 1A (ARID domain-containing protein 1A) (B120) (BRG1-associated factor 250) (BAF250) (BRG1-associated factor 250a) (BAF250A) (Osa homolog 1) (hOSA1) (SWI-like protein) (SWI/SNF complex protein p270) (SWI/SNF-related, matrix-associated, actin-dependent regulator of chromatin subfamily F member 1) (hELD)	ARID1A BAF250 BAF250A C1orf4 OSA1 SMARCF1	ARTPQPSSPMDQMGK	1.022	2.26244	0.0313952	1.17788	1.03441	2.02489	0.0488122	1.01784	5270000	4140000	5380000	1830000	10650000	5970000	7.02735	6.77597	7697	112034
O14497	1	AT-rich interactive domain-containing protein 1A OS=Homo sapiens GN=ARID1A PE=1 SV=3 - [ARI1A_HUMAN]	O14497	S696	AT-rich interactive domain-containing protein 1A (ARID domain-containing protein 1A) (B120) (BRG1-associated factor 250) (BAF250) (BRG1-associated factor 250a) (BAF250A) (Osa homolog 1) (hOSA1) (SWI-like protein) (SWI/SNF complex protein p270) (SWI/SNF-related, matrix-associated, actin-dependent regulator of chromatin subfamily F member 1) (hELD)	ARID1A BAF250 BAF250A C1orf4 OSA1 SMARCF1	LPGIRGPSPSPVGSP	0.985	1.20773	-0.0218044	0.272297	0.996964	1.08092	-0.00438732	0.112257	58800000	95200000	57900000	78800000	116700000	174000000	8.06707	8.24055	4099	26777	CMGC/CDK	CDK4
O14497	1	AT-rich interactive domain-containing protein 1A OS=Homo sapiens GN=ARID1A PE=1 SV=3 - [ARI1A_HUMAN]	O14497	S698	AT-rich interactive domain-containing protein 1A (ARID domain-containing protein 1A) (B120) (BRG1-associated factor 250) (BAF250) (BRG1-associated factor 250a) (BAF250A) (Osa homolog 1) (hOSA1) (SWI-like protein) (SWI/SNF complex protein p270) (SWI/SNF-related, matrix-associated, actin-dependent regulator of chromatin subfamily F member 1) (hELD)	ARID1A BAF250 BAF250A C1orf4 OSA1 SMARCF1	GIRGPSPSPVGSPAS	1.169	0.977517	0.225275	-0.0328061	1.1832	0.874878	0.242692	-0.192847	8250000	40600000	9650000	41600000	17900000	82200000	7.25285	7.91487	20655	96752	CMGC/CDK	CDK4
O14497	1	AT-rich interactive domain-containing protein 1A OS=Homo sapiens GN=ARID1A PE=1 SV=3 - [ARI1A_HUMAN]	O14497	S702	AT-rich interactive domain-containing protein 1A (ARID domain-containing protein 1A) (B120) (BRG1-associated factor 250) (BAF250) (BRG1-associated factor 250a) (BAF250A) (Osa homolog 1) (hOSA1) (SWI-like protein) (SWI/SNF complex protein p270) (SWI/SNF-related, matrix-associated, actin-dependent regulator of chromatin subfamily F member 1) (hELD)	ARID1A BAF250 BAF250A C1orf4 OSA1 SMARCF1	PSPSPVGSPASVAQS	1.169	0.977517	0.225275	-0.0328061	1.1832	0.874878	0.242692	-0.192847	8250000	40600000	9650000	41600000	17900000	82200000	7.25285	7.91487	20655	96752	CMGC/CDK	CDK4
O14497	1	AT-rich interactive domain-containing protein 1A OS=Homo sapiens GN=ARID1A PE=1 SV=3 - [ARI1A_HUMAN]	O14497	S772	AT-rich interactive domain-containing protein 1A (ARID domain-containing protein 1A) (B120) (BRG1-associated factor 250) (BAF250) (BRG1-associated factor 250a) (BAF250A) (Osa homolog 1) (hOSA1) (SWI-like protein) (SWI/SNF complex protein p270) (SWI/SNF-related, matrix-associated, actin-dependent regulator of chromatin subfamily F member 1) (hELD)	ARID1A BAF250 BAF250A C1orf4 OSA1 SMARCF1	PQPGSALSPRQPSGG	1.159	1.07296	0.212881	0.101598	1.17308	0.9603	0.230298	-0.0584423	33800000	171000000	39200000	159000000	73000000	330000000	7.86332	8.51851	71225	27198	CMGC/CDK	CDK4
O14523	1	C2 domain-containing protein 2-like OS=Homo sapiens GN=C2CD2L PE=1 SV=3 - [C2C2L_HUMAN]	O14523	S662	C2 domain-containing protein 2-like (Transmembrane protein 24)	C2CD2L KIAA0285 TMEM24 DLNB23	KEAGLSQSHDDLSNA	1.014	1.21065	0.0200577	0.275786	1.02632	1.08354	0.0374747	0.115746	18600000	8700000	18800000	7190000	37400000	15890000	7.57287	7.20112	43063	65877
O14523	1	C2 domain-containing protein 2-like OS=Homo sapiens GN=C2CD2L PE=1 SV=3 - [C2C2L_HUMAN]	O14523	S703	C2 domain-containing protein 2-like (Transmembrane protein 24)	C2CD2L KIAA0285 TMEM24 DLNB23	PKANGNPSPQL****	0.992	1.0627	-0.011588	0.0877334	1.00405	0.951116	0.00582908	-0.072307	32100000	13100000	31900000	12300000	64000000	25400000	7.80618	7.40483	61414	95604
O14545	1	TRAF-type zinc finger domain-containing protein 1 OS=Homo sapiens GN=TRAFD1 PE=1 SV=1 - [TRAD1_HUMAN]	O14545	S278	TRAF-type zinc finger domain-containing protein 1 (Protein FLN29)	TRAFD1 FLN29	QSHGGPRSLSDIKGA	0.887	1.18483	-0.172994	0.244685	0.897773	1.06043	-0.155577	0.0846447	18800000	7200000	16700000	6080000	35500000	13280000	7.55023	7.1232	87545	71038
O14545	1	TRAF-type zinc finger domain-containing protein 1 OS=Homo sapiens GN=TRAFD1 PE=1 SV=1 - [TRAD1_HUMAN]	O14545	S327	TRAF-type zinc finger domain-containing protein 1 (Protein FLN29)	TRAFD1 FLN29	SLNTGSSSPRGVEEP	1.024	1.37363	0.0342157	0.45799	1.03644	1.2294	0.0516328	0.297949	761000000	452000000	779000000	329000000	1540000000	781000000	9.18752	8.89265	4920	117240
O14545	1	TRAF-type zinc finger domain-containing protein 1 OS=Homo sapiens GN=TRAFD1 PE=1 SV=1 - [TRAD1_HUMAN]	O14545	S415	TRAF-type zinc finger domain-containing protein 1 (Protein FLN29)	TRAFD1 FLN29	DSQPQETSPELPRRR	0.987	1.04932	-0.018878	0.0694519	0.998988	0.93914	-0.00146096	-0.0905885	733000000	857000000	724000000	816000000	1457000000	1673000000	9.16346	9.2235	4601	115646
O14545	1	TRAF-type zinc finger domain-containing protein 1 OS=Homo sapiens GN=TRAFD1 PE=1 SV=1 - [TRAD1_HUMAN]	O14545	T414	TRAF-type zinc finger domain-containing protein 1 (Protein FLN29)	TRAFD1 FLN29	LDSQPQETSPELPRR	0.972	1.04384	-0.0409718	0.0619024	0.983806	0.934238	-0.0235547	-0.098138	1400000000	426000000	1360000000	408000000	2760000000	834000000	9.44091	8.92117	4387	23256
O14558	1	Heat shock protein beta-6 OS=Homo sapiens GN=HSPB6 PE=1 SV=2 - [HSPB6_HUMAN]	O14558	S16	Heat shock protein beta-6 (HspB6) (Heat shock 20 kDa-like protein p20)	HSPB6	PSWLRRASAPLPGLS	1.512	1.98807	0.596458	0.99137	1.53036	1.77932	0.613875	0.831329	4520000	12400000	6830000	6250000	11350000	18650000	7.055	7.27068	40839	60941
O14578	1	Citron Rho-interacting kinase OS=Homo sapiens GN=CIT PE=1 SV=2 - [CTRO_HUMAN]	O14578	S1971	Citron Rho-interacting kinase (CRIK) (EC 2.7.11.1) (Serine/threonine-protein kinase 21)	CIT CRIK KIAA0949 STK21	TELRRDKSPGRPLER	0.903	1.20627	-0.147202	0.270556	0.913968	1.07961	-0.129785	0.110516	9450000	13100000	8530000	10900000	17980000	24000000	7.25479	7.38021	47379	77915	CAMK/CAMK2	CaMK2d, CaMK2g
O14578	1	Citron Rho-interacting kinase OS=Homo sapiens GN=CIT PE=1 SV=2 - [CTRO_HUMAN]	O14578	S1993	Citron Rho-interacting kinase (CRIK) (EC 2.7.11.1) (Serine/threonine-protein kinase 21)	CIT CRIK KIAA0949 STK21	LSTRRERSPGRLFED	0.868	1.2285	-0.204233	0.296899	0.878543	1.09951	-0.186816	0.136859	25100000	4700000	21800000	3830000	46900000	8530000	7.67117	6.93095	53306	84259	AGC	PKN1
O14579	1	Coatomer subunit epsilon OS=Homo sapiens GN=COPE PE=2 SV=3 - [COPE_HUMAN]	O14579	S13	Coatomer subunit epsilon (Epsilon-coat protein) (Epsilon-COP)	COPE	PGPASGGSGEVDELF	1.008	1.08578	0.0114956	0.118727	1.02024	0.97177	0.0289127	-0.0413135	5240000	14100000	5290000	13000000	10530000	27100000	7.02243	7.43297	68845	21055
O14579	1	Coatomer subunit epsilon OS=Homo sapiens GN=COPE PE=2 SV=3 - [COPE_HUMAN]	O14579	S99	Coatomer subunit epsilon (Epsilon-coat protein) (Epsilon-COP)	COPE	AHESRRDSIVAELDR	0.971	1.41443	-0.0424568	0.500218	0.982794	1.26591	-0.0250397	0.340177	3230000	11600000	3140000	8200000	6370000	19800000	6.80414	7.29667	51406	79457	STE/STE20	NRK
O14617	1	AP-3 complex subunit delta-1 OS=Homo sapiens GN=AP3D1 PE=1 SV=1 - [AP3D1_HUMAN]	O14617	S658	AP-3 complex subunit delta-1 (AP-3 complex subunit delta) (Adapter-related protein complex 3 subunit delta-1) (Delta-adaptin)	AP3D1 PRO0039	RRPKHRPSEADEEEL	0.924	1.3947	-0.114035	0.479955	0.935223	1.24826	-0.0966182	0.319915	20200000	4230000	18700000	3030000	38900000	7260000	7.58995	6.86094	52575	83352
O14617	1	AP-3 complex subunit delta-1 OS=Homo sapiens GN=AP3D1 PE=1 SV=1 - [AP3D1_HUMAN]	O14617	S686	AP-3 complex subunit delta-1 (AP-3 complex subunit delta) (Adapter-related protein complex 3 subunit delta-1) (Delta-adaptin)	AP3D1 PRO0039	NPFYIKSSPSPQKRY	0.621	0.844595	-0.687335	-0.243669	0.628543	0.755912	-0.669918	-0.403709	86000000	20900000	53400000	24700000	139400000	45600000	8.14426	7.65896	46296	68932
O14617	1	AP-3 complex subunit delta-1 OS=Homo sapiens GN=AP3D1 PE=1 SV=1 - [AP3D1_HUMAN]	O14617	S9	AP-3 complex subunit delta-1 (AP-3 complex subunit delta) (Adapter-related protein complex 3 subunit delta-1) (Delta-adaptin)	AP3D1 PRO0039	ALKMVKGSIDRMFDK	1.393	1.7094	0.478195	0.773491	1.40992	1.52991	0.495612	0.613451	2230000	2010000	3110000	1180000	5340000	3190000	6.72754	6.50379	81200	75869
O14639	1	Actin-binding LIM protein 1 OS=Homo sapiens GN=ABLIM1 PE=1 SV=3 - [ABLM1_HUMAN]	O14639	S367	Actin-binding LIM protein 1 (abLIM-1) (Actin-binding LIM protein family member 1) (Actin-binding double zinc finger protein) (LIMAB1) (Limatin)	ABLIM1 ABLIM KIAA0059 LIMAB1	PGSSIPGSPGHTIYA	1.225	0.921659	0.292782	-0.117695	1.23988	0.824885	0.310199	-0.277735	60500000	66000000	74200000	71600000	134700000	137600000	8.12937	8.13862	43437	66303
O14639	1	Actin-binding LIM protein 1 OS=Homo sapiens GN=ABLIM1 PE=1 SV=3 - [ABLM1_HUMAN]	O14639	S431	Actin-binding LIM protein 1 (abLIM-1) (Actin-binding LIM protein family member 1) (Actin-binding double zinc finger protein) (LIMAB1) (Limatin)	ABLIM1 ABLIM KIAA0059 LIMAB1	GESPRTLSPTPSAEG	1.017	1.06724	0.0243197	0.093879	1.02935	0.955176	0.0417367	-0.0661614	531000000	371000000	540000000	348000000	1071000000	719000000	9.02979	8.85673	4676	51662
O14639	1	Actin-binding LIM protein 1 OS=Homo sapiens GN=ABLIM1 PE=1 SV=3 - [ABLM1_HUMAN]	O14639	S435	Actin-binding LIM protein 1 (abLIM-1) (Actin-binding LIM protein family member 1) (Actin-binding double zinc finger protein) (LIMAB1) (Limatin)	ABLIM1 ABLIM KIAA0059 LIMAB1	RTLSPTPSAEGYQDV	1.041	1.33869	0.0579701	0.42082	1.05364	1.19813	0.0753871	0.260779	4870000	34900000	5070000	26100000	9940000	61000000	6.99739	7.78533	20834	96942
O14639	1	Actin-binding LIM protein 1 OS=Homo sapiens GN=ABLIM1 PE=1 SV=3 - [ABLM1_HUMAN]	O14639	S452	Actin-binding LIM protein 1 (abLIM-1) (Actin-binding LIM protein family member 1) (Actin-binding double zinc finger protein) (LIMAB1) (Limatin)	ABLIM1 ABLIM KIAA0059 LIMAB1	RMIHRSTSQGSINSP	1.005	1.20773	0.0071955	0.272297	1.01721	1.08092	0.0246126	0.112257	502000000	261000000	504000000	216000000	1006000000	477000000	9.0026	8.67852	4078	26784
O14639	1	Actin-binding LIM protein 1 OS=Homo sapiens GN=ABLIM1 PE=1 SV=3 - [ABLM1_HUMAN]	O14639	S455	Actin-binding LIM protein 1 (abLIM-1) (Actin-binding LIM protein family member 1) (Actin-binding double zinc finger protein) (LIMAB1) (Limatin)	ABLIM1 ABLIM KIAA0059 LIMAB1	HRSTSQGSINSPVYS	1.581	1.07759	0.660837	0.107803	1.6002	0.96444	0.678254	-0.0522371	8680000	29400000	13700000	27300000	22380000	56700000	7.34986	7.75358	20652	96750
O14639	1	Actin-binding LIM protein 1 OS=Homo sapiens GN=ABLIM1 PE=1 SV=3 - [ABLM1_HUMAN]	O14639	S458	Actin-binding LIM protein 1 (abLIM-1) (Actin-binding LIM protein family member 1) (Actin-binding double zinc finger protein) (LIMAB1) (Limatin)	ABLIM1 ABLIM KIAA0059 LIMAB1	TSQGSINSPVYSRHS	0.404	0.516262	-1.30757	-0.953824	0.408907	0.462055	-1.29016	-1.11386	199000000	41700000	80200000	80800000	279200000	122500000	8.44592	8.08814	3643	114108
O14639	1	Actin-binding LIM protein 1 OS=Homo sapiens GN=ABLIM1 PE=1 SV=3 - [ABLM1_HUMAN]	O14639	S540	Actin-binding LIM protein 1 (abLIM-1) (Actin-binding LIM protein family member 1) (Actin-binding double zinc finger protein) (LIMAB1) (Limatin)	ABLIM1 ABLIM KIAA0059 LIMAB1	ALAAQSKSSEDIIKF	0.905	1.2837	-0.14401	0.360305	0.915992	1.14891	-0.126593	0.200264	48800000	44100000	44200000	34300000	93000000	78400000	7.96848	7.89432	48051	73251
O14639	1	Actin-binding LIM protein 1 OS=Homo sapiens GN=ABLIM1 PE=1 SV=3 - [ABLM1_HUMAN]	O14639	S587	Actin-binding LIM protein 1 (abLIM-1) (Actin-binding LIM protein family member 1) (Actin-binding double zinc finger protein) (LIMAB1) (Limatin)	ABLIM1 ABLIM KIAA0059 LIMAB1	PDMKRRSSGREEDDE	2.5	1.74825	1.32193	0.805913	2.53036	1.56469	1.33935	0.645873	3770000	2760000	9430000	1580000	13200000	4340000	7.12057	6.63749	36665	130927
O14639	1	Actin-binding LIM protein 1 OS=Homo sapiens GN=ABLIM1 PE=1 SV=3 - [ABLM1_HUMAN]	O14639	S655	Actin-binding LIM protein 1 (abLIM-1) (Actin-binding LIM protein family member 1) (Actin-binding double zinc finger protein) (LIMAB1) (Limatin)	ABLIM1 ABLIM KIAA0059 LIMAB1	IPSSKTASLPGYGRN	0.967	0.980392	-0.0484122	-0.0285692	0.978745	0.877451	-0.0309952	-0.18861	915000000	677000000	885000000	691000000	1800000000	1368000000	9.25527	9.13609	4303	26963
O14639	1	Actin-binding LIM protein 1 OS=Homo sapiens GN=ABLIM1 PE=1 SV=3 - [ABLM1_HUMAN]	O14639	S706	Actin-binding LIM protein 1 (abLIM-1) (Actin-binding LIM protein family member 1) (Actin-binding double zinc finger protein) (LIMAB1) (Limatin)	ABLIM1 ABLIM KIAA0059 LIMAB1	MRMDRGVSMPNMLEP	1.157	1.05597	0.210389	0.0785637	1.17105	0.94509	0.227806	-0.0814767	357000000	719000000	413000000	680000000	770000000	1399000000	8.88649	9.14582	3926	114497
O14639	1	Actin-binding LIM protein 1 OS=Homo sapiens GN=ABLIM1 PE=1 SV=3 - [ABLM1_HUMAN]	O14639	T433	Actin-binding LIM protein 1 (abLIM-1) (Actin-binding LIM protein family member 1) (Actin-binding double zinc finger protein) (LIMAB1) (Limatin)	ABLIM1 ABLIM KIAA0059 LIMAB1	SPRTLSPTPSAEGYQ	1.018	1.15741	0.0257376	0.210897	1.03036	1.03588	0.0431546	0.0508564	15800000	72600000	16100000	62700000	31900000	135300000	7.50379	8.1313	20726	51437
O14639	1	Actin-binding LIM protein 1 OS=Homo sapiens GN=ABLIM1 PE=1 SV=3 - [ABLM1_HUMAN]	O14639	T653	Actin-binding LIM protein 1 (abLIM-1) (Actin-binding LIM protein family member 1) (Actin-binding double zinc finger protein) (LIMAB1) (Limatin)	ABLIM1 ABLIM KIAA0059 LIMAB1	SHIPSSKTASLPGYG	1.015	0.961538	0.0214797	-0.0565835	1.02733	0.860577	0.0388968	-0.216624	11100000	373000000	11300000	388000000	22400000	761000000	7.35025	8.88138	13250	109453
O14646	1	Chromodomain-helicase-DNA-binding protein 1 OS=Homo sapiens GN=CHD1 PE=1 SV=1 - [CHD1_HUMAN]	O14646	S1677	Chromodomain-helicase-DNA-binding protein 1 (CHD-1) (EC 3.6.4.12) (ATP-dependent helicase CHD1)	CHD1	ASSSGPRSPLDQRSY	1.015	1.13507	0.0214797	0.182786	1.02733	1.01589	0.0388968	0.0227457	203000000	55800000	206000000	49100000	409000000	104900000	8.61172	8.02078	39286	59590
O14646	1	Chromodomain-helicase-DNA-binding protein 1 OS=Homo sapiens GN=CHD1 PE=1 SV=1 - [CHD1_HUMAN]	O14646	S1688	Chromodomain-helicase-DNA-binding protein 1 (CHD-1) (EC 3.6.4.12) (ATP-dependent helicase CHD1)	CHD1	QRSYGSRSPFEHSVE	0.744	1.82815	-0.426625	0.870387	0.753036	1.6362	-0.409208	0.710347	21200000	16800000	15700000	9160000	36900000	25960000	7.56703	7.4143	58940	90466
O14646	1	Chromodomain-helicase-DNA-binding protein 1 OS=Homo sapiens GN=CHD1 PE=1 SV=1 - [CHD1_HUMAN]	O14646	S90	Chromodomain-helicase-DNA-binding protein 1 (CHD-1) (EC 3.6.4.12) (ATP-dependent helicase CHD1)	CHD1	GAEFWKSSPSILAVQ	1.084	1.00705	0.116365	0.0101344	1.09717	0.901309	0.133782	-0.149906	6980000	27100000	7570000	26900000	14550000	54000000	7.16286	7.73239	105702	27832	CMGC/CDK	CDK9
O14647	1	Chromodomain-helicase-DNA-binding protein 2 OS=Homo sapiens GN=CHD2 PE=2 SV=2 - [CHD2_HUMAN]	O14647	S1365	Chromodomain-helicase-DNA-binding protein 2 (CHD-2) (EC 3.6.4.12) (ATP-dependent helicase CHD2)	CHD2	EHGIELSSPRHSDNP	1.204	1.11732	0.267835	0.16004	1.21862	1	0.285252	0	13800000	7110000	16700000	6360000	30500000	13470000	7.4843	7.12937	53004	83988
O14647	1	Chromodomain-helicase-DNA-binding protein 2 OS=Homo sapiens GN=CHD2 PE=2 SV=2 - [CHD2_HUMAN]	O14647	S1807	Chromodomain-helicase-DNA-binding protein 2 (CHD-2) (EC 3.6.4.12) (ATP-dependent helicase CHD2)	CHD2	KSPLDHRSPLERSLE	1.011	0.988142	0.015783	-0.0172093	1.02328	0.884387	0.0332001	-0.17725	13600000	15800000	13700000	16000000	27300000	31800000	7.43616	7.50243	91924	78394
O14686	1	Histone-lysine N-methyltransferase MLL2 OS=Homo sapiens GN=MLL2 PE=1 SV=1 - [MLL2_HUMAN]	O14686	S1396	Histone-lysine N-methyltransferase MLL2 (EC 2.1.1.43) (ALL1-related protein) (Lysine N-methyltransferase 2B) (KMT2B) (Myeloid/lymphoid or mixed-lineage leukemia protein 2)	MLL2 ALR KMT2B	IKLEGPVSPDVEPGK	1.096	1.13507	0.132248	0.182786	1.10931	1.01589	0.149665	0.0227457	28000000	15500000	30700000	13600000	58700000	29100000	7.76864	7.46389	75397	124573
O14686	1	Histone-lysine N-methyltransferase MLL2 OS=Homo sapiens GN=MLL2 PE=1 SV=1 - [MLL2_HUMAN]	O14686	S1999	Histone-lysine N-methyltransferase MLL2 (EC 2.1.1.43) (ALL1-related protein) (Lysine N-methyltransferase 2B) (KMT2B) (Myeloid/lymphoid or mixed-lineage leukemia protein 2)	MLL2 ALR KMT2B	KASEPLLSPPPFGES	1.185	1.02987	0.244887	0.0424568	1.19939	0.92173	0.262304	-0.117584	14000000	41900000	16600000	40700000	30600000	82600000	7.48572	7.91698	80291	56056
O14686	1	Histone-lysine N-methyltransferase MLL2 OS=Homo sapiens GN=MLL2 PE=1 SV=1 - [MLL2_HUMAN]	O14686	S2365	Histone-lysine N-methyltransferase MLL2 (EC 2.1.1.43) (ALL1-related protein) (Lysine N-methyltransferase 2B) (KMT2B) (Myeloid/lymphoid or mixed-lineage leukemia protein 2)	MLL2 ALR KMT2B	SQRSGITSPVEKRED	0.869	1.11732	-0.202572	0.16004	0.879555	1	-0.185155	0	32200000	23300000	28000000	20800000	60200000	44100000	7.7796	7.64444	3598	26286
O14686	1	Histone-lysine N-methyltransferase MLL2 OS=Homo sapiens GN=MLL2 PE=1 SV=1 - [MLL2_HUMAN]	O14686	S2855	Histone-lysine N-methyltransferase MLL2 (EC 2.1.1.43) (ALL1-related protein) (Lysine N-methyltransferase 2B) (KMT2B) (Myeloid/lymphoid or mixed-lineage leukemia protein 2)	MLL2 ALR KMT2B	EEGGRHPSPCQFTIA	0.972	0.855432	-0.0409718	-0.225275	0.983806	0.765612	-0.0235547	-0.385315	29500000	13300000	28600000	15600000	58100000	28900000	7.76418	7.4609	87838	148319
O14686	1	Histone-lysine N-methyltransferase MLL2 OS=Homo sapiens GN=MLL2 PE=1 SV=1 - [MLL2_HUMAN]	O14686	S4463	Histone-lysine N-methyltransferase MLL2 (EC 2.1.1.43) (ALL1-related protein) (Lysine N-methyltransferase 2B) (KMT2B) (Myeloid/lymphoid or mixed-lineage leukemia protein 2)	MLL2 ALR KMT2B	EQEDRALSPVIPLIP	0.982	1.07643	-0.0262051	0.106249	0.993927	0.963402	-0.00878802	-0.0537909	22200000	257000000	21800000	239000000	44000000	496000000	7.64345	8.69548	6730	120802
O14686	1	Histone-lysine N-methyltransferase MLL2 OS=Homo sapiens GN=MLL2 PE=1 SV=1 - [MLL2_HUMAN]	O14686	S4547	Histone-lysine N-methyltransferase MLL2 (EC 2.1.1.43) (ALL1-related protein) (Lysine N-methyltransferase 2B) (KMT2B) (Myeloid/lymphoid or mixed-lineage leukemia protein 2)	MLL2 ALR KMT2B	YEVLFPESPARGGTE	1.008	0.957854	0.0114956	-0.0621217	1.02024	0.85728	0.0289127	-0.222162	5860000	33500000	5900000	35000000	11760000	68500000	7.07041	7.83569	107715	30179
O14686	1	Histone-lysine N-methyltransferase MLL2 OS=Homo sapiens GN=MLL2 PE=1 SV=1 - [MLL2_HUMAN]	O14686	T1965	Histone-lysine N-methyltransferase MLL2 (EC 2.1.1.43) (ALL1-related protein) (Lysine N-methyltransferase 2B) (KMT2B) (Myeloid/lymphoid or mixed-lineage leukemia protein 2)	MLL2 ALR KMT2B	TPRHQPSTPDPFLKP	0.974	1.19332	-0.0380063	0.254978	0.98583	1.06802	-0.0205893	0.0949374	17100000	41200000	16600000	34600000	33700000	75800000	7.52763	7.87967	51027	79058
O14713	1	Integrin beta-1-binding protein 1 OS=Homo sapiens GN=ITGB1BP1 PE=1 SV=1 - [ITBP1_HUMAN]	O14713	S41	Integrin beta-1-binding protein 1 (Integrin cytoplasmic domain-associated protein 1) (ICAP-1)	ITGB1BP1 ICAP1	SRSSTVASLDTDSTK	2.068	0.809061	1.04824	-0.305679	2.09312	0.72411	1.06565	-0.465719	8320000	8520000	17200000	10500000	25520000	19020000	7.40688	7.27921	3958	114560
O14745	1	Ezrin-radixin-moesin-binding phosphoprotein 50 OS=Homo sapiens GN=SLC9A3R1 PE=1 SV=4 - [NHERF_HUMAN]	O14745	S280	Na(+)/H(+) exchange regulatory cofactor NHE-RF1 (NHERF-1) (Ezrin-radixin-moesin-binding phosphoprotein 50) (EBP50) (Regulatory cofactor of Na(+)/H(+) exchanger) (Sodium-hydrogen exchanger regulatory factor 1) (Solute carrier family 9 isoform A3 regulatory factor 1)	SLC9A3R1 NHERF NHERF1	LAEAALESPRPALVR	0.828	0.794913	-0.272297	-0.331132	0.838057	0.711447	-0.25488	-0.491172	71000000	137000000	58800000	172000000	129800000	309000000	8.11327	8.48996	38213	55995	Atypical/PIKK/FRAP	FRAP
O14745	1	Ezrin-radixin-moesin-binding phosphoprotein 50 OS=Homo sapiens GN=SLC9A3R1 PE=1 SV=4 - [NHERF_HUMAN]	O14745	S290	Na(+)/H(+) exchange regulatory cofactor NHE-RF1 (NHERF-1) (Ezrin-radixin-moesin-binding phosphoprotein 50) (EBP50) (Regulatory cofactor of Na(+)/H(+) exchanger) (Sodium-hydrogen exchanger regulatory factor 1) (Solute carrier family 9 isoform A3 regulatory factor 1)	SLC9A3R1 NHERF NHERF1	PALVRSASSDTSEEL	1.27	1.3587	0.344828	0.442222	1.28543	1.21603	0.362246	0.282182	17000000	8070000	21600000	5940000	38600000	14010000	7.58659	7.14644	66761	99877	CAMK/PKD	PKD1, PKD2, PKD3
O14874	1	[3-methyl-2-oxobutanoate dehydrogenase [lipoamide]] kinase, mitochondrial OS=Homo sapiens GN=BCKDK PE=1 SV=2 - [BCKD_HUMAN]	O14874	S31	[3-methyl-2-oxobutanoate dehydrogenase [lipoamide]] kinase, mitochondrial (EC 2.7.11.4) (Branched-chain alpha-ketoacid dehydrogenase kinase) (BCKD-kinase) (BCKDHKIN)	BCKDK	ALALRARSTSATDTH	0.98	1.1534	-0.0291463	0.205896	0.991903	1.0323	-0.0117293	0.0458557	312000000	142000000	306000000	123000000	618000000	265000000	8.79099	8.42325	47071	149685
O14908	1	PDZ domain-containing protein GIPC1 OS=Homo sapiens GN=GIPC1 PE=1 SV=2 - [GIPC1_HUMAN]	O14908	S232	PDZ domain-containing protein GIPC1 (GAIP C-terminus-interacting protein) (RGS-GAIP-interacting protein) (RGS19-interacting protein 1) (Tax interaction protein 2) (TIP-2)	GIPC1 C19orf3 GIPC RGS19IP1	SAGGRPGSGPQLGTG	1.05	1.39082	0.0703893	0.475936	1.06275	1.24478	0.0878064	0.315896	49200000	34200000	51600000	24600000	100800000	58800000	8.00346	7.76938	39807	59917
O14908	1	PDZ domain-containing protein GIPC1 OS=Homo sapiens GN=GIPC1 PE=1 SV=2 - [GIPC1_HUMAN]	O14908	T242	PDZ domain-containing protein GIPC1 (GAIP C-terminus-interacting protein) (RGS-GAIP-interacting protein) (RGS19-interacting protein 1) (Tax interaction protein 2) (TIP-2)	GIPC1 C19orf3 GIPC RGS19IP1	QLGTGRGTLRLRSRG	0.729	1	-0.456009	0	0.737854	0.895	-0.438592	-0.16004	75600000	74900000	55100000	74900000	130700000	149800000	8.11628	8.17551	91941	72887
O14920	1	Inhibitor of nuclear factor kappa-B kinase subunit beta OS=Homo sapiens GN=IKBKB PE=1 SV=1 - [IKKB_HUMAN]	O14920	S672	Inhibitor of nuclear factor kappa-B kinase subunit beta (I-kappa-B-kinase beta) (IKK-B) (IKK-beta) (IkBKB) (EC 2.7.11.10) (I-kappa-B kinase 2) (IKK2) (Nuclear factor NF-kappa-B inhibitor kinase beta) (NFKBIKB)	IKBKB IKKB	VRGPVSGSPDSMNAS	1.051	1.04712	0.0717627	0.0664274	1.06377	0.937173	0.0891797	-0.0936131	27100000	13300000	28500000	12700000	55600000	26000000	7.74507	7.41497	81235	143817	Atypical/PIKK/FRAP	FRAP
O14924	1	Regulator of G-protein signaling 12 OS=Homo sapiens GN=RGS12 PE=1 SV=1 - [RGS12_HUMAN]	O14924	S850	Regulator of G-protein signaling 12 (RGS12)	RGS12	DSQQVPSSPASKHSL	0.909	1.99203	-0.137648	0.994241	0.92004	1.78287	-0.120231	0.8342	133000000	59700000	121000000	29900000	254000000	89600000	8.40483	7.95231	4198	26717	STE/STE7	MAP2K2
O14974	1	Protein phosphatase 1 regulatory subunit 12A OS=Homo sapiens GN=PPP1R12A PE=1 SV=1 - [MYPT1_HUMAN]	O14974	S445	Protein phosphatase 1 regulatory subunit 12A (Myosin phosphatase-targeting subunit 1) (Myosin phosphatase target subunit 1) (Protein phosphatase myosin-binding subunit)	PPP1R12A MBS MYPT1	LGLRKTGSYGALAEI	0.965	1.10497	-0.0513992	0.14401	0.976721	0.98895	-0.0339821	-0.0160301	1130000000	1190000000	1090000000	1070000000	2220000000	2260000000	9.34635	9.35411	6056	29370	CAMK/CAMK2	CaMK2d, CaMK2g
O14974	1	Protein phosphatase 1 regulatory subunit 12A OS=Homo sapiens GN=PPP1R12A PE=1 SV=1 - [MYPT1_HUMAN]	O14974	S507	Protein phosphatase 1 regulatory subunit 12A (Myosin phosphatase-targeting subunit 1) (Myosin phosphatase target subunit 1) (Protein phosphatase myosin-binding subunit)	PPP1R12A MBS MYPT1	TIPRRLASTSDIEEK	1.382	1.46628	0.466758	0.552156	1.39879	1.31232	0.484175	0.392116	193000000	168000000	267000000	115000000	460000000	283000000	8.66276	8.45179	39772	59838	CAMK/CAMK2	CaMK2d, CaMK2g
O14974	1	Protein phosphatase 1 regulatory subunit 12A OS=Homo sapiens GN=PPP1R12A PE=1 SV=1 - [MYPT1_HUMAN]	O14974	S871	Protein phosphatase 1 regulatory subunit 12A (Myosin phosphatase-targeting subunit 1) (Myosin phosphatase target subunit 1) (Protein phosphatase myosin-binding subunit)	PPP1R12A MBS MYPT1	ENEQEQQSDTEEGSN	1.009	1.40252	0.0129262	0.488026	1.02126	1.25526	0.0303432	0.327986	65600000	67000000	66200000	47800000	131800000	114800000	8.11992	8.05994	33984	125421	AGC/GRK	BARK1
O14974	1	Protein phosphatase 1 regulatory subunit 12A OS=Homo sapiens GN=PPP1R12A PE=1 SV=1 - [MYPT1_HUMAN]	O14974	S908	Protein phosphatase 1 regulatory subunit 12A (Myosin phosphatase-targeting subunit 1) (Myosin phosphatase target subunit 1) (Protein phosphatase myosin-binding subunit)	PPP1R12A MBS MYPT1	YDSLLGRSGSYSYLE	0.867	1.49031	-0.205896	0.575615	0.87753	1.33383	-0.188479	0.415575	152000000	26900000	132000000	18100000	284000000	45000000	8.45332	7.65321	4847	110019
O14974	1	Protein phosphatase 1 regulatory subunit 12A OS=Homo sapiens GN=PPP1R12A PE=1 SV=1 - [MYPT1_HUMAN]	O14974	S910	Protein phosphatase 1 regulatory subunit 12A (Myosin phosphatase-targeting subunit 1) (Myosin phosphatase target subunit 1) (Protein phosphatase myosin-binding subunit)	PPP1R12A MBS MYPT1	SLLGRSGSYSYLEER	1.422	0.951475	0.507921	-0.0717627	1.43927	0.85157	0.525339	-0.231803	25200000	65800000	35900000	69200000	61100000	135000000	7.78604	8.13033	105638	27716	CAMK/MLCK	caMLCK, smMLCK
O14974	1	Protein phosphatase 1 regulatory subunit 12A OS=Homo sapiens GN=PPP1R12A PE=1 SV=1 - [MYPT1_HUMAN]	O14974	T443	Protein phosphatase 1 regulatory subunit 12A (Myosin phosphatase-targeting subunit 1) (Myosin phosphatase target subunit 1) (Protein phosphatase myosin-binding subunit)	PPP1R12A MBS MYPT1	WRLGLRKTGSYGALA	0.999	1.9802	-0.00144342	0.985645	1.01113	1.77228	0.0159736	0.825604	3550000	572000	3550000	289000	7100000	861000	6.85126	5.935	14059	94979
O14974	1	Protein phosphatase 1 regulatory subunit 12A OS=Homo sapiens GN=PPP1R12A PE=1 SV=1 - [MYPT1_HUMAN]	O14974	T696	Protein phosphatase 1 regulatory subunit 12A (Myosin phosphatase-targeting subunit 1) (Myosin phosphatase target subunit 1) (Protein phosphatase myosin-binding subunit)	PPP1R12A MBS MYPT1	ARQSRRSTQGVTLTD	0.918	1.07759	-0.123434	0.107803	0.92915	0.96444	-0.106017	-0.0522371	648000000	410000000	595000000	381000000	1243000000	791000000	9.09447	8.89818	37371	135649	CAMK/DAPK	DAPK3
O14974	1	Protein phosphatase 1 regulatory subunit 12A OS=Homo sapiens GN=PPP1R12A PE=1 SV=1 - [MYPT1_HUMAN]	O14974	Y446	Protein phosphatase 1 regulatory subunit 12A (Myosin phosphatase-targeting subunit 1) (Myosin phosphatase target subunit 1) (Protein phosphatase myosin-binding subunit)	PPP1R12A MBS MYPT1	GLRKTGSYGALAEIT	0.98	1.11982	-0.0291463	0.163268	0.991903	1.00224	-0.0117293	0.00322751	50800000	262000000	49800000	234000000	100600000	496000000	8.0026	8.69548	107066	29373	TK/Axl	MER
O14979	1	Heterogeneous nuclear ribonucleoprotein D-like OS=Homo sapiens GN=HNRPDL PE=1 SV=3 - [HNRDL_HUMAN]	O14979	S241	Heterogeneous nuclear ribonucleoprotein D-like (hnRNP D-like) (hnRNP DL) (AU-rich element RNA-binding factor) (JKT41-binding protein) (Protein laAUF1)	HNRPDL JKTBP	KVFVGGLSPDTSEEQ	1.108	1.06496	0.147958	0.0908029	1.12146	0.953142	0.165375	-0.0692375	237000000	155000000	263000000	145000000	500000000	300000000	8.69897	8.47712	5951	29187
O15013	1	Rho guanine nucleotide exchange factor 10 OS=Homo sapiens GN=ARHGEF10 PE=1 SV=4 - [ARHGA_HUMAN]	O15013	S1232	Rho guanine nucleotide exchange factor 10	ARHGEF10 KIAA0294	DKDKSRDSLAPGPEP	1.395	1.34048	0.480265	0.422752	1.41194	1.19973	0.497682	0.262712	11000000	12400000	15400000	9270000	26400000	21670000	7.4216	7.33586	78068	134083
O15013	1	Rho guanine nucleotide exchange factor 10 OS=Homo sapiens GN=ARHGEF10 PE=1 SV=4 - [ARHGA_HUMAN]	O15013	S379	Rho guanine nucleotide exchange factor 10	ARHGEF10 KIAA0294	RSFIRTKSLIAQDHR	1.165	1.04493	0.22033	0.0634092	1.17915	0.935214	0.237747	-0.0966312	58600000	5290000	68300000	5060000	126900000	10350000	8.10346	7.01494	35359	129617
O15014	1	Zinc finger protein 609 OS=Homo sapiens GN=ZNF609 PE=1 SV=2 - [ZN609_HUMAN]	O15014	S1055	Zinc finger protein 609	ZNF609 KIAA0295	PTLTKAPSLTDLVKS	1.384	1.15207	0.468844	0.204233	1.40081	1.03111	0.486261	0.0441926	21800000	54200000	30100000	47000000	51900000	101200000	7.71517	8.00518	6076	24734
O15014	1	Zinc finger protein 609 OS=Homo sapiens GN=ZNF609 PE=1 SV=2 - [ZN609_HUMAN]	O15014	S1285	Zinc finger protein 609	ZNF609 KIAA0295	DADKARASPSVTCKS	0.867	0.987167	-0.205896	-0.0186342	0.87753	0.883514	-0.188479	-0.178675	22000000	6760000	19100000	6850000	41100000	13610000	7.61384	7.13386	81062	143418
O15014	1	Zinc finger protein 609 OS=Homo sapiens GN=ZNF609 PE=1 SV=2 - [ZN609_HUMAN]	O15014	S1313	Zinc finger protein 609	ZNF609 KIAA0295	ASHYKSKSPTISDKT	0.494	0.674309	-1.01742	-0.568519	0.5	0.603506	-1	-0.728559	7410000	1700000	3660000	2510000	11070000	4210000	7.04415	6.62428	88917	164524
O15014	1	Zinc finger protein 609 OS=Homo sapiens GN=ZNF609 PE=1 SV=2 - [ZN609_HUMAN]	O15014	S358	Zinc finger protein 609	ZNF609 KIAA0295	APPRFCDSPTSDLEM	1.008	1.14286	0.0114956	0.192645	1.02024	1.02286	0.0289127	0.0326047	56200000	57400000	56700000	50200000	112900000	107600000	8.05269	8.03181	4746	27498
O15014	1	Zinc finger protein 609 OS=Homo sapiens GN=ZNF609 PE=1 SV=2 - [ZN609_HUMAN]	O15014	S467	Zinc finger protein 609	ZNF609 KIAA0295	SKRVRTNSMGSATGP	1.305	1.41243	0.38405	0.498179	1.32085	1.26412	0.401467	0.338138	60700000	91700000	79200000	64900000	139900000	156600000	8.14582	8.19479	3692	114206
O15014	1	Zinc finger protein 609 OS=Homo sapiens GN=ZNF609 PE=1 SV=2 - [ZN609_HUMAN]	O15014	S576	Zinc finger protein 609	ZNF609 KIAA0295	VRLVEPHSPSPSSKF	1.032	1.07296	0.045443	0.101598	1.04453	0.9603	0.06286	-0.0584423	162000000	305000000	167000000	284000000	329000000	589000000	8.5172	8.77012	35497	133673
O15014	1	Zinc finger protein 609 OS=Homo sapiens GN=ZNF609 PE=1 SV=2 - [ZN609_HUMAN]	O15014	S758	Zinc finger protein 609	ZNF609 KIAA0295	CRAEEGKSPFRESSG	0.992	1.13122	-0.011588	0.177882	1.00405	1.01244	0.00582908	0.0178413	60600000	73600000	60200000	65100000	120800000	138700000	8.08207	8.14208	44878	147259
O15014	1	Zinc finger protein 609 OS=Homo sapiens GN=ZNF609 PE=1 SV=2 - [ZN609_HUMAN]	O15014	S804	Zinc finger protein 609	ZNF609 KIAA0295	SFTDNAPSPSIGGSS	0.957	1.0582	-0.0634092	0.0816138	0.968623	0.94709	-0.0459921	-0.0784266	125000000	31500000	120000000	29800000	245000000	61300000	8.38917	7.78746	5778	24545
O15014	1	Zinc finger protein 609 OS=Homo sapiens GN=ZNF609 PE=1 SV=2 - [ZN609_HUMAN]	O15014	T746	Zinc finger protein 609	ZNF609 KIAA0295	KELESPLTPGKVCRA	1.1	1.06045	0.137504	0.0846703	1.11336	0.949099	0.154921	-0.0753701	79000000	146000000	86900000	137000000	165900000	283000000	8.21985	8.45179	4782	116541
O15021	1	Microtubule-associated serine/threonine-protein kinase 4 OS=Homo sapiens GN=MAST4 PE=1 SV=2 - [MAST4_HUMAN]	O15021	S1191	Microtubule-associated serine/threonine-protein kinase 4 (EC 2.7.11.1)	MAST4 KIAA0303	YRSGRRKSAGNIPLS	1.43	1.50376	0.516015	0.588574	1.44737	1.34586	0.533432	0.428533	140000000	94800000	200000000	63000000	340000000	157800000	8.53148	8.19811	5929	29085
O15021	1	Microtubule-associated serine/threonine-protein kinase 4 OS=Homo sapiens GN=MAST4 PE=1 SV=2 - [MAST4_HUMAN]	O15021	S1198	Microtubule-associated serine/threonine-protein kinase 4 (EC 2.7.11.1)	MAST4 KIAA0303	SAGNIPLSPLARTPS	1.234	0.360881	0.303342	-1.47041	1.24899	0.322988	0.320759	-1.63045	2930000	3060000	3620000	8470000	6550000	11530000	6.81624	7.06183	21118	28713
O15021	1	Microtubule-associated serine/threonine-protein kinase 4 OS=Homo sapiens GN=MAST4 PE=1 SV=2 - [MAST4_HUMAN]	O15021	S1240	Microtubule-associated serine/threonine-protein kinase 4 (EC 2.7.11.1)	MAST4 KIAA0303	AFPSKMHSPPTIVRH	0.863	1.23153	-0.212568	0.300448	0.873482	1.10222	-0.19515	0.140408	81800000	97800000	70600000	79400000	152400000	177200000	8.18298	8.24846	39716	59759
O15021	1	Microtubule-associated serine/threonine-protein kinase 4 OS=Homo sapiens GN=MAST4 PE=1 SV=2 - [MAST4_HUMAN]	O15021	S1288	Microtubule-associated serine/threonine-protein kinase 4 (EC 2.7.11.1)	MAST4 KIAA0303	HLCSRKHSLEVTQEE	1.31	2.46914	0.389567	1.30401	1.32591	2.20988	0.406984	1.14397	9690000	9810000	12700000	3970000	22390000	13780000	7.35005	7.13925	50482	168951
O15021	1	Microtubule-associated serine/threonine-protein kinase 4 OS=Homo sapiens GN=MAST4 PE=1 SV=2 - [MAST4_HUMAN]	O15021	S1344	Microtubule-associated serine/threonine-protein kinase 4 (EC 2.7.11.1)	MAST4 KIAA0303	RKVGRQESVDDLDRD	1.219	1.52207	0.285698	0.606035	1.23381	1.36225	0.303115	0.445994	129000000	127000000	157000000	83200000	286000000	210200000	8.45637	8.32263	47646	72850
O15021	1	Microtubule-associated serine/threonine-protein kinase 4 OS=Homo sapiens GN=MAST4 PE=1 SV=2 - [MAST4_HUMAN]	O15021	S1600	Microtubule-associated serine/threonine-protein kinase 4 (EC 2.7.11.1)	MAST4 KIAA0303	PGLVAPESPVRKSPS	0.959	1.01112	-0.0603973	0.0159576	0.970648	0.904954	-0.0429802	-0.144083	50900000	48200000	48800000	47700000	99700000	95900000	7.9987	7.98182	42977	65996
O15021	1	Microtubule-associated serine/threonine-protein kinase 4 OS=Homo sapiens GN=MAST4 PE=1 SV=2 - [MAST4_HUMAN]	O15021	S1681	Microtubule-associated serine/threonine-protein kinase 4 (EC 2.7.11.1)	MAST4 KIAA0303	TTSARELSPSSLKMN	0.869	1.0989	-0.202572	0.136062	0.879555	0.983516	-0.185155	-0.0239789	122000000	93800000	106000000	85300000	228000000	179100000	8.35793	8.2531	4474	115887
O15021	1	Microtubule-associated serine/threonine-protein kinase 4 OS=Homo sapiens GN=MAST4 PE=1 SV=2 - [MAST4_HUMAN]	O15021	S1768	Microtubule-associated serine/threonine-protein kinase 4 (EC 2.7.11.1)	MAST4 KIAA0303	CLGQNLHSPDLARPR	0.897	1.05263	-0.15682	0.0740006	0.907895	0.942105	-0.139403	-0.0860398	25900000	29800000	23200000	28300000	49100000	58100000	7.69108	7.76418	46569	163505
O15021	1	Microtubule-associated serine/threonine-protein kinase 4 OS=Homo sapiens GN=MAST4 PE=1 SV=2 - [MAST4_HUMAN]	O15021	S2283	Microtubule-associated serine/threonine-protein kinase 4 (EC 2.7.11.1)	MAST4 KIAA0303	PEKSLSCSSSFPETR	0.845	1.55763	-0.242977	0.639355	0.855263	1.39408	-0.22556	0.479314	20400000	37100000	17200000	23800000	37600000	60900000	7.57519	7.78462	70634	23526
O15021	1	Microtubule-associated serine/threonine-protein kinase 4 OS=Homo sapiens GN=MAST4 PE=1 SV=2 - [MAST4_HUMAN]	O15021	S2341	Microtubule-associated serine/threonine-protein kinase 4 (EC 2.7.11.1)	MAST4 KIAA0303	THMTKSDSLPSFRVS	1.145	1.01112	0.195348	0.0159576	1.15891	0.904954	0.212765	-0.144083	46400000	16300000	53100000	16100000	99500000	32400000	7.99782	7.51055	5255	28239
O15027	1	Protein transport protein Sec16A OS=Homo sapiens GN=SEC16A PE=1 SV=3 - [SC16A_HUMAN]	O15027	S136	Protein transport protein Sec16A (SEC16 homolog A)	SEC16A KIAA0310 SEC16 SEC16L	RIVNHWASPELRQNP	1.076	1.13636	0.105678	0.184425	1.08907	1.01705	0.123095	0.0243842	7290000	10300000	7840000	9100000	15130000	19400000	7.17984	7.2878	40908	145480
O15027	1	Protein transport protein Sec16A OS=Homo sapiens GN=SEC16A PE=1 SV=3 - [SC16A_HUMAN]	O15027	S153	Protein transport protein Sec16A (SEC16 homolog A)	SEC16A KIAA0310 SEC16 SEC16L	KNEHRPASALVNPLA	1.107	1.27551	0.146655	0.351074	1.12045	1.14158	0.164072	0.191034	756000	827000	837000	649000	1593000	1476000	6.20222	6.16909	51427	84672
O15027	1	Protein transport protein Sec16A OS=Homo sapiens GN=SEC16A PE=1 SV=3 - [SC16A_HUMAN]	O15027	S1786	Protein transport protein Sec16A (SEC16 homolog A)	SEC16A KIAA0310 SEC16 SEC16L	LPDGPLASPARVPMF	0.967	1.13636	-0.0484122	0.184425	0.978745	1.01705	-0.0309952	0.0243842	25900000	90600000	25000000	79700000	50900000	170300000	7.70672	8.23121	107227	29578
O15027	1	Protein transport protein Sec16A OS=Homo sapiens GN=SEC16A PE=1 SV=3 - [SC16A_HUMAN]	O15027	S1905	Protein transport protein Sec16A (SEC16 homolog A)	SEC16A KIAA0310 SEC16 SEC16L	TQPPLSLSPAPETKR	1.126	1.15607	0.171207	0.209228	1.13968	1.03468	0.188624	0.0491875	237000000	129000000	267000000	112000000	504000000	241000000	8.70243	8.38202	5425	24146
O15027	1	Protein transport protein Sec16A OS=Homo sapiens GN=SEC16A PE=1 SV=3 - [SC16A_HUMAN]	O15027	S391	Protein transport protein Sec16A (SEC16 homolog A)	SEC16A KIAA0310 SEC16 SEC16L	FFKQIDSSPVGGETD	1.031	1.05597	0.0440443	0.0785637	1.04352	0.94509	0.0614614	-0.0814767	324000000	34200000	334000000	32400000	658000000	66600000	8.81823	7.82347	4498	115982	STE/STE11	MAP3K3
O15027	1	Protein transport protein Sec16A OS=Homo sapiens GN=SEC16A PE=1 SV=3 - [SC16A_HUMAN]	O15027	S417	Protein transport protein Sec16A (SEC16 homolog A)	SEC16A KIAA0310 SEC16 SEC16L	VSQPSTPSPPKPTGI	1.251	1.24224	0.323082	0.312939	1.26619	1.1118	0.340499	0.152899	4940000	31100000	6180000	25000000	11120000	56100000	7.0461	7.74896	31375	42153
O15027	1	Protein transport protein Sec16A OS=Homo sapiens GN=SEC16A PE=1 SV=3 - [SC16A_HUMAN]	O15027	S891	Protein transport protein Sec16A (SEC16 homolog A)	SEC16A KIAA0310 SEC16 SEC16L	VPPQQQASPPQLPKA	0.978	1.02881	-0.0320936	0.0409718	0.989879	0.920782	-0.0146766	-0.119069	480000000	217000000	470000000	211000000	950000000	428000000	8.97772	8.63144	5416	24162
O15027	1	Protein transport protein Sec16A OS=Homo sapiens GN=SEC16A PE=1 SV=3 - [SC16A_HUMAN]	O15027	T1876	Protein transport protein Sec16A (SEC16 homolog A)	SEC16A KIAA0310 SEC16 SEC16L	DGKFANLTPSRTVPD	1.281	0.953289	0.35727	-0.0690147	1.29656	0.853194	0.374688	-0.229055	16100000	18900000	20600000	19900000	36700000	38800000	7.56467	7.58883	4448	23262
O15042	1	U2-associated protein SR140 OS=Homo sapiens GN=SR140 PE=1 SV=2 - [SR140_HUMAN]	O15042	S485	U2 snRNP-associated SURP motif-containing protein (140 kDa Ser/Arg-rich domain protein) (U2-associated protein SR140)	U2SURP KIAA0332 SR140	YSILQGDSPTKWRTE	1.047	1.20919	0.0662614	0.274041	1.05972	1.08222	0.0836785	0.114	98900000	57200000	104000000	47300000	202900000	104500000	8.30728	8.01912	5910	29058
O15042	1	U2-associated protein SR140 OS=Homo sapiens GN=SR140 PE=1 SV=2 - [SR140_HUMAN]	O15042	S67	U2 snRNP-associated SURP motif-containing protein (140 kDa Ser/Arg-rich domain protein) (U2-associated protein SR140)	U2SURP KIAA0332 SR140	ARESLCDSPHQNLSR	1.043	1.13379	0.0607392	0.181149	1.05567	1.01474	0.0781562	0.021109	116000000	29900000	121000000	26400000	237000000	56300000	8.37475	7.75051	43432	66290
O15056	1	Synaptojanin-2 OS=Homo sapiens GN=SYNJ2 PE=1 SV=3 - [SYNJ2_HUMAN]	O15056	S1124	Synaptojanin-2 (EC 3.1.3.36) (Synaptic inositol 1,4,5-trisphosphate 5-phosphatase 2)	SYNJ2 KIAA0348	LMVKKSASDASISSG	0.904	1.37174	-0.145605	0.456009	0.91498	1.22771	-0.128188	0.295969	76400000	13000000	69100000	9490000	145500000	22490000	8.16286	7.35199	75905	162990
O15061	1	Desmuslin OS=Homo sapiens GN=DMN PE=1 SV=2 - [DMN_HUMAN]	O15061	S1044	Synemin (Desmuslin)	SYNM DMN KIAA0353 SYN	ESLSRQRSPAPGSPD	0.819	0.979432	-0.288065	-0.0299829	0.828947	0.876592	-0.270648	-0.190023	29300000	3720000	24000000	3790000	53300000	7510000	7.72673	6.87564	104622	115156	CAMK/PKD	PKD1
O15063	1	Uncharacterized protein KIAA0355 OS=Homo sapiens GN=KIAA0355 PE=2 SV=2 - [K0355_HUMAN]	O15063	S723	Uncharacterized protein KIAA0355	KIAA0355	GLAPQQQSPKQQQPQ	0.951	1.33333	-0.0724828	0.415037	0.962551	1.19333	-0.0550657	0.254997	20900000	60600000	19900000	45400000	40800000	106000000	7.61066	8.02531	37246	51496
O15085	1	Rho guanine nucleotide exchange factor 11 OS=Homo sapiens GN=ARHGEF11 PE=1 SV=1 - [ARHGB_HUMAN]	O15085	S1295	Rho guanine nucleotide exchange factor 11 (PDZ-RhoGEF)	ARHGEF11 KIAA0380	LPPRTRNSGIWESPE	1.034	1.21951	0.0482362	0.286304	1.04656	1.09146	0.0656532	0.126264	55300000	19600000	57200000	16100000	112500000	35700000	8.05115	7.55267	41438	146006
O15085	1	Rho guanine nucleotide exchange factor 11 OS=Homo sapiens GN=ARHGEF11 PE=1 SV=1 - [ARHGB_HUMAN]	O15085	S1480	Rho guanine nucleotide exchange factor 11 (PDZ-RhoGEF)	ARHGEF11 KIAA0380	RWTDGSLSPPAKEPL	1.005	0.819672	0.0071955	-0.286881	1.01721	0.733607	0.0246126	-0.446922	89500000	20800000	89900000	25400000	179400000	46200000	8.25382	7.66464	33773	125236
O15085	1	Rho guanine nucleotide exchange factor 11 OS=Homo sapiens GN=ARHGEF11 PE=1 SV=1 - [ARHGB_HUMAN]	O15085	S556	Rho guanine nucleotide exchange factor 11 (PDZ-RhoGEF)	ARHGEF11 KIAA0380	STFHIPLSPVEVKPG	0.72	1.29366	-0.473931	0.37146	0.728745	1.15783	-0.456514	0.211419	9360000	12100000	6740000	9330000	16100000	21430000	7.20683	7.33102	44378	163568
O15085	1	Rho guanine nucleotide exchange factor 11 OS=Homo sapiens GN=ARHGEF11 PE=1 SV=1 - [ARHGB_HUMAN]	O15085	S614	Rho guanine nucleotide exchange factor 11 (PDZ-RhoGEF)	ARHGEF11 KIAA0380	IRLGRSESLKGREEM	0.797	0.909091	-0.327348	-0.137504	0.80668	0.813636	-0.309931	-0.297544	20800000	21100000	16600000	23200000	37400000	44300000	7.57287	7.6464	47111	72280
O15085	1	Rho guanine nucleotide exchange factor 11 OS=Homo sapiens GN=ARHGEF11 PE=1 SV=1 - [ARHGB_HUMAN]	O15085	T1292	Rho guanine nucleotide exchange factor 11 (PDZ-RhoGEF)	ARHGEF11 KIAA0380	LEHLPPRTRNSGIWE	0.865	1.17371	-0.209228	0.231075	0.875506	1.05047	-0.191811	0.0710343	21300000	13400000	18500000	11400000	39800000	24800000	7.59988	7.39445	41293	145842
O15085	1	Rho guanine nucleotide exchange factor 11 OS=Homo sapiens GN=ARHGEF11 PE=1 SV=1 - [ARHGB_HUMAN]	O15085	T668	Rho guanine nucleotide exchange factor 11 (PDZ-RhoGEF)	ARHGEF11 KIAA0380	TRSLENPTPPFTPKM	0.729	0.974659	-0.456009	-0.0370307	0.737854	0.87232	-0.438592	-0.197071	33300	10600000	24200	10900000	57500	21500000	4.75967	7.33244	21831	28505
O15085	1	Rho guanine nucleotide exchange factor 11 OS=Homo sapiens GN=ARHGEF11 PE=1 SV=1 - [ARHGB_HUMAN]	O15085	T672	Rho guanine nucleotide exchange factor 11 (PDZ-RhoGEF)	ARHGEF11 KIAA0380	ENPTPPFTPKMGRRS	0.729	1.60256	-0.456009	0.680382	0.737854	1.43429	-0.438592	0.520342	33300	5690000	24200	3550000	57500	9240000	4.75967	6.96567	21831	110418
O15116	1	U6 snRNA-associated Sm-like protein LSm1 OS=Homo sapiens GN=LSM1 PE=1 SV=1 - [LSM1_HUMAN]	O15116	S123	U6 snRNA-associated Sm-like protein LSm1 (Cancer-associated Sm-like) (Small nuclear ribonuclear CaSm)	LSM1 CASM	ALKDRGLSIPRADTL	0.85	0.909091	-0.234465	-0.137504	0.860324	0.813636	-0.217048	-0.297544	17900000	81800000	15200000	89900000	33100000	171700000	7.51983	8.23477	70543	27327
O15127	1	Secretory carrier-associated membrane protein 2 OS=Homo sapiens GN=SCAMP2 PE=1 SV=2 - [SCAM2_HUMAN]	O15127	S319	Secretory carrier-associated membrane protein 2 (Secretory carrier membrane protein 2)	SCAMP2	RTFHRAASSAAQGAF	0.925	1.03413	-0.112475	0.0484122	0.936235	0.925543	-0.0950577	-0.111628	74300000	72700000	68700000	70300000	143000000	143000000	8.15534	8.15534	61363	95552
O15143	1	Actin-related protein 2/3 complex subunit 1B OS=Homo sapiens GN=ARPC1B PE=1 SV=3 - [ARC1B_HUMAN]	O15143	S310	Actin-related protein 2/3 complex subunit 1B (Arp2/3 complex 41 kDa subunit) (p41-ARC)	ARPC1B ARC41	QNLDKKASSEGGTAA	1.09	0.99108	0.124328	-0.0129262	1.10324	0.887017	0.141745	-0.172967	31600000	17200000	34500000	17300000	66100000	34500000	7.8202	7.53782	87529	68581	STE/STE20	HGK, PAK1
O15155	1	BET1 homolog OS=Homo sapiens GN=BET1 PE=1 SV=1 - [BET1_HUMAN]	O15155	S50	BET1 homolog (hBET1) (Golgi vesicular membrane-trafficking protein p18)	BET1	VTAIKSLSIEIGHEV	1.875	1.93424	0.906891	0.951764	1.89777	1.73114	0.924308	0.791723	3060000	14600000	5740000	7550000	8800000	22150000	6.94448	7.34537	80153	55685
O15164	1	Transcription intermediary factor 1-alpha OS=Homo sapiens GN=TRIM24 PE=1 SV=3 - [TIF1A_HUMAN]	O15164	S1025	Transcription intermediary factor 1-alpha (TIF1-alpha) (EC 6.3.2.-) (E3 ubiquitin-protein ligase TRIM24) (RING finger protein 82) (Tripartite motif-containing protein 24)	TRIM24 RNF82 TIF1 TIF1A	ESEDNKFSDDSDDDF	0.968	1.27389	-0.046921	0.349235	0.979757	1.14013	-0.029504	0.189195	72000000	78400000	69700000	61600000	141700000	140000000	8.15137	8.14613	105848	28035
O15164	1	Transcription intermediary factor 1-alpha OS=Homo sapiens GN=TRIM24 PE=1 SV=3 - [TIF1A_HUMAN]	O15164	S1028	Transcription intermediary factor 1-alpha (TIF1-alpha) (EC 6.3.2.-) (E3 ubiquitin-protein ligase TRIM24) (RING finger protein 82) (Tripartite motif-containing protein 24)	TRIM24 RNF82 TIF1 TIF1A	DNKFSDDSDDDFVQP	0.968	1.27389	-0.046921	0.349235	0.979757	1.14013	-0.029504	0.189195	72000000	78400000	69700000	61600000	141700000	140000000	8.15137	8.14613	105848	28035
O15164	1	Transcription intermediary factor 1-alpha OS=Homo sapiens GN=TRIM24 PE=1 SV=3 - [TIF1A_HUMAN]	O15164	S811	Transcription intermediary factor 1-alpha (TIF1-alpha) (EC 6.3.2.-) (E3 ubiquitin-protein ligase TRIM24) (RING finger protein 82) (Tripartite motif-containing protein 24)	TRIM24 RNF82 TIF1 TIF1A	WLDPSQKSPLHVGET	1.027	0.880282	0.0384362	-0.183963	1.03947	0.787852	0.0558532	-0.344003	32800000	5120000	33600000	5820000	66400000	10940000	7.82217	7.03902	46585	64202	Atypical/PIKK/FRAP	FRAP
O15169	1	Axin-1 OS=Homo sapiens GN=AXIN1 PE=1 SV=2 - [AXN1_HUMAN]	O15169	S217	Axin-1 (Axis inhibition protein 1) (hAxin)	AXIN1 AXIN	YTRTGSESPKVCSDQ	0.905	0.853242	-0.14401	-0.228973	0.915992	0.763652	-0.126593	-0.389013	16500000	4770000	14900000	5590000	31400000	10360000	7.49693	7.01536	74212	46497	CMGC/DYRK	HIPK2
O15169	1	Axin-1 OS=Homo sapiens GN=AXIN1 PE=1 SV=2 - [AXN1_HUMAN]	O15169	S77	Axin-1 (Axis inhibition protein 1) (hAxin)	AXIN1 AXIN	YEPEGSASPTPPYLK	1.093	5.20833	0.128293	2.38082	1.10628	4.66146	0.14571	2.22078	1130000	1190000	1240000	228000	2370000	1418000	6.37475	6.15168	80482	132428	CMGC/DYRK	HIPK2
O15173	1	Membrane-associated progesterone receptor component 2 OS=Homo sapiens GN=PGRMC2 PE=1 SV=1 - [PGRC2_HUMAN]	O15173	S104	Membrane-associated progesterone receptor component 2 (Progesterone membrane-binding protein) (Steroid receptor protein DG6)	PGRMC2 DG6 PMBP	RMKKRDFSLEQLRQY	0.807	1.52905	-0.309359	0.612637	0.816802	1.3685	-0.291942	0.452597	2930000	4730000	2370000	3090000	5300000	7820000	6.72428	6.89321	55693	86960
O15173	1	Membrane-associated progesterone receptor component 2 OS=Homo sapiens GN=PGRMC2 PE=1 SV=1 - [PGRC2_HUMAN]	O15173	S208	Membrane-associated progesterone receptor component 2 (Progesterone membrane-binding protein) (Steroid receptor protein DG6)	PGRMC2 DG6 PMBP	LKPGEEPSEYTDEED	1.252	1.05374	0.324235	0.07552	1.26721	0.943098	0.341652	-0.0845204	30700000	6390000	38500000	6070000	69200000	12460000	7.84011	7.09552	4450	154605
O15173	1	Membrane-associated progesterone receptor component 2 OS=Homo sapiens GN=PGRMC2 PE=1 SV=1 - [PGRC2_HUMAN]	O15173	T211	Membrane-associated progesterone receptor component 2 (Progesterone membrane-binding protein) (Steroid receptor protein DG6)	PGRMC2 DG6 PMBP	GEEPSEYTDEEDTKD	1.087	1.23305	0.120352	0.302226	1.1002	1.10358	0.137769	0.142186	2350000000	2920000000	2550000000	2370000000	4900000000	5290000000	9.6902	9.72346	36369	51401
O15173	1	Membrane-associated progesterone receptor component 2 OS=Homo sapiens GN=PGRMC2 PE=1 SV=1 - [PGRC2_HUMAN]	O15173	T216	Membrane-associated progesterone receptor component 2 (Progesterone membrane-binding protein) (Steroid receptor protein DG6)	PGRMC2 DG6 PMBP	EYTDEEDTKDHNKQD	0.959	1.05597	-0.0603973	0.0785637	0.970648	0.94509	-0.0429802	-0.0814767	79800000	107000000	76500000	101000000	156300000	208000000	8.19396	8.31806	50749	86430
O15173	1	Membrane-associated progesterone receptor component 2 OS=Homo sapiens GN=PGRMC2 PE=1 SV=1 - [PGRC2_HUMAN]	O15173	Y210	Membrane-associated progesterone receptor component 2 (Progesterone membrane-binding protein) (Steroid receptor protein DG6)	PGRMC2 DG6 PMBP	PGEEPSEYTDEEDTK	0.872	1.11483	-0.1976	0.15682	0.882591	0.99777	-0.180183	-0.0032203	2310000000	2100000000	2020000000	1880000000	4330000000	3980000000	9.63649	9.59988	50627	78596
O15231	1	Zinc finger protein 185 OS=Homo sapiens GN=ZNF185 PE=1 SV=2 - [ZN185_HUMAN]	O15231	S17	Zinc finger protein 185 (LIM domain protein ZNF185) (P1-A)	ZNF185	APYNIRRSSTSGDTE	1.043	1.46413	0.0607392	0.550043	1.05567	1.3104	0.0781562	0.390002	1050000000	223000000	1100000000	153000000	2150000000	376000000	9.33244	8.57519	5636	125348
O15231	1	Zinc finger protein 185 OS=Homo sapiens GN=ZNF185 PE=1 SV=2 - [ZN185_HUMAN]	O15231	S221	Zinc finger protein 185 (LIM domain protein ZNF185) (P1-A)	ZNF185	STPERQSSPSGSEQL	0.955	1.17371	-0.0664274	0.231075	0.966599	1.05047	-0.0490103	0.0710343	275000000	130000000	262000000	111000000	537000000	241000000	8.72997	8.38202	3635	114063
O15231	1	Zinc finger protein 185 OS=Homo sapiens GN=ZNF185 PE=1 SV=2 - [ZN185_HUMAN]	O15231	S233	Zinc finger protein 185 (LIM domain protein ZNF185) (P1-A)	ZNF185	EQLVRRESCGSSVLT	1.328	1.52207	0.409255	0.606035	1.34413	1.36225	0.426672	0.445994	257000000	98200000	342000000	64500000	599000000	162700000	8.77743	8.21139	38203	55984
O15231	1	Zinc finger protein 185 OS=Homo sapiens GN=ZNF185 PE=1 SV=2 - [ZN185_HUMAN]	O15231	S71	Zinc finger protein 185 (LIM domain protein ZNF185) (P1-A)	ZNF185	AAKKSTGSPTQETQA	0.895	1.03734	-0.16004	0.0528949	0.90587	0.928423	-0.142623	-0.107145	135000000	150000000	121000000	145000000	256000000	295000000	8.40824	8.46982	5092	117236
O15231	1	Zinc finger protein 185 OS=Homo sapiens GN=ZNF185 PE=1 SV=2 - [ZN185_HUMAN]	O15231	T23	Zinc finger protein 185 (LIM domain protein ZNF185) (P1-A)	ZNF185	RSSTSGDTEEEEEEE	0.54	0.721501	-0.888969	-0.470927	0.546559	0.645743	-0.871552	-0.630968	84600000	35900000	45700000	49700000	130300000	85600000	8.11494	7.93247	67972	15100
O15234	1	Protein CASC3 OS=Homo sapiens GN=CASC3 PE=1 SV=2 - [CASC3_HUMAN]	O15234	S148	Protein CASC3 (Cancer susceptibility candidate gene 3 protein) (Metastatic lymph node gene 51 protein) (MLN 51) (Protein barentsz) (Btz)	CASC3 MLN51	TVTGERQSGDGQEST	1.008	1.0929	0.0114956	0.128156	1.02024	0.978142	0.0289127	-0.0318841	557000000	193000000	561000000	177000000	1118000000	370000000	9.04844	8.5682	74127	127047
O15234	1	Protein CASC3 OS=Homo sapiens GN=CASC3 PE=1 SV=2 - [CASC3_HUMAN]	O15234	S265	Protein CASC3 (Cancer susceptibility candidate gene 3 protein) (Metastatic lymph node gene 51 protein) (MLN 51) (Protein barentsz) (Btz)	CASC3 MLN51	IRKPRYGSPPQRDPN	1.024	1.06496	0.0342157	0.0908029	1.03644	0.953142	0.0516328	-0.0692375	281000000	84900000	288000000	79700000	569000000	164600000	8.75511	8.21643	40287	144707
O15234	1	Protein CASC3 OS=Homo sapiens GN=CASC3 PE=1 SV=2 - [CASC3_HUMAN]	O15234	S363	Protein CASC3 (Cancer susceptibility candidate gene 3 protein) (Metastatic lymph node gene 51 protein) (MLN 51) (Protein barentsz) (Btz)	CASC3 MLN51	QTSVRDPSPEADAPV	1.081	1.19332	0.112367	0.254978	1.09413	1.06802	0.129784	0.0949374	15800000	7620000	17000000	6380000	32800000	14000000	7.51587	7.14613	87831	148295
O15234	1	Protein CASC3 OS=Homo sapiens GN=CASC3 PE=1 SV=2 - [CASC3_HUMAN]	O15234	Y263	Protein CASC3 (Cancer susceptibility candidate gene 3 protein) (Metastatic lymph node gene 51 protein) (MLN 51) (Protein barentsz) (Btz)	CASC3 MLN51	RRIRKPRYGSPPQRD	1.024	1.06496	0.0342157	0.0908029	1.03644	0.953142	0.0516328	-0.0692375	281000000	84900000	288000000	79700000	569000000	164600000	8.75511	8.21643	40287	144707
O15320	1	Cutaneous T-cell lymphoma-associated antigen 5 OS=Homo sapiens GN=CTAGE5 PE=1 SV=2 - [CTGE5_HUMAN]	O15320	S522	Cutaneous T-cell lymphoma-associated antigen 5 (Protein cTAGE-5) (Meningioma-expressed antigen 6/11) (cTAGE family member 5)	CTAGE5 MEA11 MEA6 MGEA11 MGEA6	EHSPYGPSPLGWPSS	0.876	0.887311	-0.190997	-0.172488	0.88664	0.794144	-0.17358	-0.332528	9160000	5630000	8030000	6350000	17190000	11980000	7.23528	7.07846	41561	146130	CMGC	MOK
O15320	1	Cutaneous T-cell lymphoma-associated antigen 5 OS=Homo sapiens GN=CTAGE5 PE=1 SV=2 - [CTGE5_HUMAN]	O15320	S536	Cutaneous T-cell lymphoma-associated antigen 5 (Protein cTAGE-5) (Meningioma-expressed antigen 6/11) (cTAGE family member 5)	CTAGE5 MEA11 MEA6 MGEA11 MGEA6	SETRAFLSPPTLLEG	1.035	1.14286	0.0496308	0.192645	1.04757	1.02286	0.0670478	0.0326047	7350000	240000000	7600000	210000000	14950000	450000000	7.17464	8.65321	108129	121236	CMGC	MOK
O15320	1	Cutaneous T-cell lymphoma-associated antigen 5 OS=Homo sapiens GN=CTAGE5 PE=1 SV=2 - [CTGE5_HUMAN]	O15320	S635	Cutaneous T-cell lymphoma-associated antigen 5 (Protein cTAGE-5) (Meningioma-expressed antigen 6/11) (cTAGE family member 5)	CTAGE5 MEA11 MEA6 MGEA11 MGEA6	CSNSGRLSGPAELRS	0.924	0.943396	-0.114035	-0.0840643	0.935223	0.84434	-0.0966182	-0.244105	310000000	165000000	286000000	175000000	596000000	340000000	8.77525	8.53148	40734	60856
O15320;Q96RT6	2	Cutaneous T-cell lymphoma-associated antigen 5 OS=Homo sapiens GN=CTAGE5 PE=1 SV=2 - [CTGE5_HUMAN]|Protein cTAGE-2 OS=Homo sapiens GN=CTAGE1 PE=2 SV=1 - [CTGE2_HUMAN]	O15320	S647	Cutaneous T-cell lymphoma-associated antigen 5 (Protein cTAGE-5) (Meningioma-expressed antigen 6/11) (cTAGE family member 5)	CTAGE5 MEA11 MEA6 MGEA11 MGEA6	LRSFNMPSLDKMDGS	4.503	0.947867	2.17089	-0.077243	4.55769	0.848341	2.1883	-0.237283	11400000	13200000	51500000	13900000	62900000	27100000	7.79865	7.43297	5957	24676			Q96RT6	S616	Protein cTAGE-2 (Cancer/testis antigen 21.2) (CT21.2)	CTAGE1 CTAGE2
O15344	1	Midline-1 OS=Homo sapiens GN=MID1 PE=1 SV=1 - [TRI18_HUMAN]	O15344	S96	Midline-1 (EC 6.3.2.-) (Midin) (Midline 1 RING finger protein) (Putative transcription factor XPRF) (RING finger protein 59) (Tripartite motif-containing protein 18)	MID1 FXY RNF59 TRIM18 XPRF	ASVSGPNSPSETRRE	1.179	0.85034	0.237564	-0.233888	1.19332	0.761054	0.254981	-0.393928	11900000	2930000	14000000	3440000	25900000	6370000	7.4133	6.80414	81098	35039	STE/STE-Unique/NIK	NIK
O15357	1	Phosphatidylinositol-3,4,5-trisphosphate 5-phosphatase 2 OS=Homo sapiens GN=INPPL1 PE=1 SV=1 - [SHIP2_HUMAN]	O15357	S240	Phosphatidylinositol 3,4,5-trisphosphate 5-phosphatase 2 (EC 3.1.3.86) (Inositol polyphosphate phosphatase-like protein 1) (INPPL-1) (Protein 51C) (SH2 domain-containing inositol 5'-phosphatase 2) (SH2 domain-containing inositol phosphatase 2) (SHIP-2)	INPPL1 SHIP2	SKVFDQQSSPMVTRL	0.94	1.14416	-0.0892673	0.194295	0.951417	1.02403	-0.0718503	0.0342544	37200000	49600000	34900000	43300000	72100000	92900000	7.85794	7.96802	104247	26353
O15357	1	Phosphatidylinositol-3,4,5-trisphosphate 5-phosphatase 2 OS=Homo sapiens GN=INPPL1 PE=1 SV=1 - [SHIP2_HUMAN]	O15357	S241	Phosphatidylinositol 3,4,5-trisphosphate 5-phosphatase 2 (EC 3.1.3.86) (Inositol polyphosphate phosphatase-like protein 1) (INPPL-1) (Protein 51C) (SH2 domain-containing inositol 5'-phosphatase 2) (SH2 domain-containing inositol phosphatase 2) (SHIP-2)	INPPL1 SHIP2	KVFDQQSSPMVTRLL	1.359	1.08932	0.442545	0.123434	1.37551	0.974946	0.459963	-0.0366065	29400000	8170000	40000000	7490000	69400000	15660000	7.84136	7.19479	3806	23350	CMGC/GSK	GSK3A
O15372	1	Eukaryotic translation initiation factor 3 subunit H OS=Homo sapiens GN=EIF3H PE=1 SV=1 - [EIF3H_HUMAN]	O15372	S183	Eukaryotic translation initiation factor 3 subunit H (eIF3h) (Eukaryotic translation initiation factor 3 subunit 3) (eIF-3-gamma) (eIF3 p40 subunit)	EIF3H EIF3S3	VCKEKDFSPEALKKA	0.792	0.91659	-0.336428	-0.125651	0.801619	0.820348	-0.319011	-0.285692	6850000	15800000	5430000	17300000	12280000	33100000	7.0892	7.51983	106264	51903
O15400	1	Syntaxin-7 OS=Homo sapiens GN=STX7 PE=1 SV=4 - [STX7_HUMAN]	O15400	S126	Syntaxin-7	STX7	VARVRASSRVSGSFP	0.823	1.33333	-0.281036	0.415037	0.832996	1.19333	-0.263619	0.254997	70800000	2030000	58200000	1520000	129000000	3550000	8.11059	6.55023	4151	134172	AGC/AKT	AKT1
O15400	1	Syntaxin-7 OS=Homo sapiens GN=STX7 PE=1 SV=4 - [STX7_HUMAN]	O15400	S129	Syntaxin-7	STX7	VRASSRVSGSFPEDS	1.084	1.28041	0.116365	0.356606	1.09717	1.14597	0.133782	0.196565	226000000	131000000	245000000	103000000	471000000	234000000	8.67302	8.36922	36040	134193
O15400	1	Syntaxin-7 OS=Homo sapiens GN=STX7 PE=1 SV=4 - [STX7_HUMAN]	O15400	S45	Syntaxin-7	STX7	QLGTPQDSPELRQQL	1.126	1.0352	0.171207	0.0499049	1.13968	0.926501	0.188624	-0.110136	7520000	15300000	8470000	14800000	15990000	30100000	7.20385	7.47857	105796	117200
O15417	1	Trinucleotide repeat-containing gene 18 protein OS=Homo sapiens GN=TNRC18 PE=1 SV=3 - [TNC18_HUMAN]	O15417	S1127	Trinucleotide repeat-containing gene 18 protein (Long CAG trinucleotide repeat-containing gene 79 protein)	TNRC18 CAGL79 KIAA1856	GPERLALSPEDKPIR	2.315	1.13895	1.21101	0.187707	2.34312	1.01936	1.22843	0.0276667	859000	10300000	1990000	9040000	2849000	19340000	6.45469	7.28646	80202	136051
O15417	1	Trinucleotide repeat-containing gene 18 protein OS=Homo sapiens GN=TNRC18 PE=1 SV=3 - [TNC18_HUMAN]	O15417	S1136	Trinucleotide repeat-containing gene 18 protein (Long CAG trinucleotide repeat-containing gene 79 protein)	TNRC18 CAGL79 KIAA1856	EDKPIRLSPSKITEP	2.315	1.30548	1.21101	0.384584	2.34312	1.16841	1.22843	0.224543	859000	4440000	1990000	3400000	2849000	7840000	6.45469	6.89432	80202	66794
O15417	1	Trinucleotide repeat-containing gene 18 protein OS=Homo sapiens GN=TNRC18 PE=1 SV=3 - [TNC18_HUMAN]	O15417	S991	Trinucleotide repeat-containing gene 18 protein (Long CAG trinucleotide repeat-containing gene 79 protein)	TNRC18 CAGL79 KIAA1856	GTYGKAVSPPPSPRA	0.977	1.17509	-0.0335695	0.232769	0.988866	1.0517	-0.0161525	0.0727286	561000	2230000	548000	1900000	1109000	4130000	6.04493	6.61595	21431	97661
O15417	1	Trinucleotide repeat-containing gene 18 protein OS=Homo sapiens GN=TNRC18 PE=1 SV=3 - [TNC18_HUMAN]	O15417	S995	Trinucleotide repeat-containing gene 18 protein (Long CAG trinucleotide repeat-containing gene 79 protein)	TNRC18 CAGL79 KIAA1856	KAVSPPPSPRASPVA	0.977	1.17509	-0.0335695	0.232769	0.988866	1.0517	-0.0161525	0.0727286	561000	2230000	548000	1900000	1109000	4130000	6.04493	6.61595	21431	97661
O15427	1	Monocarboxylate transporter 4 OS=Homo sapiens GN=SLC16A3 PE=1 SV=1 - [MOT4_HUMAN]	O15427	S464	Monocarboxylate transporter 4 (MCT 4) (Solute carrier family 16 member 3)	SLC16A3 MCT4	VVHTPETSV******	1.074	1.05152	0.102994	0.0724828	1.08704	0.941115	0.120411	-0.0875577	47100000	73400000	50500000	69800000	97600000	143200000	7.98945	8.15594	104768	26858	TKL/RAF	RAF1
O15439	1	Multidrug resistance-associated protein 4 OS=Homo sapiens GN=ABCC4 PE=1 SV=3 - [MRP4_HUMAN]	O15439	S404	Multidrug resistance-associated protein 4 (ATP-binding cassette sub-family C member 4) (MRP/cMOAT-related ABC transporter) (Multi-specific organic anion transporter B) (MOAT-B)	ABCC4 MRP4	QRNRQLPSDGKKMVH	1.177	1.18906	0.235114	0.249822	1.1913	1.06421	0.252531	0.0897819	14300000	28300000	16800000	23800000	31100000	52100000	7.49276	7.71684	34960	133285
O15439	1	Multidrug resistance-associated protein 4 OS=Homo sapiens GN=ABCC4 PE=1 SV=3 - [MRP4_HUMAN]	O15439	T646	Multidrug resistance-associated protein 4 (ATP-binding cassette sub-family C member 4) (MRP/cMOAT-related ABC transporter) (Multi-specific organic anion transporter B) (MOAT-B)	ABCC4 MRP4	EQPPVPGTPTLRNRT	0.853	0.961538	-0.229382	-0.0565835	0.86336	0.860577	-0.211965	-0.216624	197000000	105000000	168000000	109000000	365000000	214000000	8.56229	8.33041	40638	60756	CAMK/MAPKAPK	MAPKAPK3
O15523	1	ATP-dependent RNA helicase DDX3Y OS=Homo sapiens GN=DDX3Y PE=1 SV=2 - [DDX3Y_HUMAN]	O15523	S592	ATP-dependent RNA helicase DDX3Y (EC 3.6.4.13) (DEAD box protein 3, Y-chromosomal)	DDX3Y DBY	RSKSNRFSGGFGARD	0.753	0.915751	-0.409278	-0.126973	0.762146	0.819597	-0.391861	-0.287013	10400000	3280000	7810000	3590000	18210000	6870000	7.26031	6.83696	43100	65916	AGC/PKA	PRKY
O15534	1	Period circadian protein homolog 1 OS=Homo sapiens GN=PER1 PE=1 SV=1 - [PER1_HUMAN]	O15534	S815	Period circadian protein homolog 1 (hPER1) (Circadian clock protein PERIOD 1) (Circadian pacemaker protein Rigui)	PER1 KIAA0482 PER RIGUI	DSSSTAPSALGERGC	1.04	1.04932	0.0565835	0.0694519	1.05263	0.93914	0.0740006	-0.0905885	18400000	22800000	19100000	21700000	37500000	44500000	7.57403	7.64836	40783	27085	CAMK/CAMK1	CaMK4
O15541	1	RING finger protein 113A OS=Homo sapiens GN=RNF113A PE=1 SV=1 - [R113A_HUMAN]	O15541	S84	RING finger protein 113A (Zinc finger protein 183)	RNF113A RNF113 ZNF183	KAAYGDLSSEEEEEN	1.525	1.5625	0.608809	0.643856	1.54352	1.39844	0.626226	0.483816	194000	5440000	295000	3480000	489000	8920000	5.68931	6.95036	62305	96180
O15541	1	RING finger protein 113A OS=Homo sapiens GN=RNF113A PE=1 SV=1 - [R113A_HUMAN]	O15541	S85	RING finger protein 113A (Zinc finger protein 183)	RNF113A RNF113 ZNF183	AAYGDLSSEEEEENE	1.525	1.5625	0.608809	0.643856	1.54352	1.39844	0.626226	0.483816	194000	5440000	295000	3480000	489000	8920000	5.68931	6.95036	62305	96180
O15550	1	Histone demethylase UTX OS=Homo sapiens GN=UTX PE=1 SV=2 - [UTX_HUMAN]	O15550	S818	Lysine-specific demethylase 6A (EC 1.14.11.-) (Histone demethylase UTX) (Ubiquitously-transcribed TPR protein on the X chromosome) (Ubiquitously-transcribed X chromosome tetratricopeptide repeat protein)	KDM6A UTX	TDNSVASSPSSAIST	1.09	0.993049	0.124328	-0.0100637	1.10324	0.888779	0.141745	-0.170104	5610000	5490000	6120000	5530000	11730000	11020000	7.0693	7.04218	20813	96918	Other/IKK	IKKa
O15550	1	Histone demethylase UTX OS=Homo sapiens GN=UTX PE=1 SV=2 - [UTX_HUMAN]	O15550	S829	Lysine-specific demethylase 6A (EC 1.14.11.-) (Histone demethylase UTX) (Ubiquitously-transcribed TPR protein on the X chromosome) (Ubiquitously-transcribed X chromosome tetratricopeptide repeat protein)	KDM6A UTX	AISTATPSPKSTEQT	1.09	0.993049	0.124328	-0.0100637	1.10324	0.888779	0.141745	-0.170104	5610000	5490000	6120000	5530000	11730000	11020000	7.0693	7.04218	20813	96918	Other/IKK	IKKa
O43149	1	Zinc finger ZZ-type and EF-hand domain-containing protein 1 OS=Homo sapiens GN=ZZEF1 PE=1 SV=5 - [ZZEF1_HUMAN]	O43149	S240	Zinc finger ZZ-type and EF-hand domain-containing protein 1	ZZEF1 KIAA0399	SPGDLTRSPEMDKLK	0.942	1.00402	-0.086201	0.00578235	0.953441	0.898594	-0.068784	-0.154258	18800000	2880000	17700000	2870000	36500000	5750000	7.56229	6.75967	75234	150409
O43150	1	Development and differentiation-enhancing factor 2 OS=Homo sapiens GN=DDEF2 PE=1 SV=3 - [DDEF2_HUMAN]	O43150	S701	Arf-GAP with SH3 domain, ANK repeat and PH domain-containing protein 2 (Development and differentiation-enhancing factor 2) (Paxillin-associated protein with ARF GAP activity 3) (PAG3) (Pyk2 C-terminus-associated protein) (PAP)	ASAP2 DDEF2 KIAA0400	LHEDLDESDDDMDEK	1.001	1.14811	0.00144197	0.199255	1.01316	1.02755	0.018859	0.039215	405000000	249000000	405000000	216000000	810000000	465000000	8.90849	8.66745	75642	54613
O43150	1	Development and differentiation-enhancing factor 2 OS=Homo sapiens GN=DDEF2 PE=1 SV=3 - [DDEF2_HUMAN]	O43150	S822	Arf-GAP with SH3 domain, ANK repeat and PH domain-containing protein 2 (Development and differentiation-enhancing factor 2) (Paxillin-associated protein with ARF GAP activity 3) (PAG3) (Pyk2 C-terminus-associated protein) (PAP)	ASAP2 DDEF2 KIAA0400	GSRQRSSSDPPAVHP	0.992	1.23916	-0.011588	0.309359	1.00405	1.10905	0.00582908	0.149319	22400000	22500000	22200000	18100000	44600000	40600000	7.64933	7.60853	34191	55906
O43159	1	Cerebral protein 1 OS=Homo sapiens GN=KIAA0409 PE=1 SV=2 - [HUCE1_HUMAN]	O43159	S104	Ribosomal RNA-processing protein 8 (EC 2.1.1.-) (Cerebral protein 1) (Nucleomethylin)	RRP8 KIAA0409 NML hucep-1	QKQGPPCSDSEEEVE	0.462	0.718907	-1.11404	-0.476122	0.467611	0.643422	-1.09662	-0.636163	2950000	7520000	1360000	10500000	4310000	18020000	6.63448	7.25575	72931	31320
O43159	1	Cerebral protein 1 OS=Homo sapiens GN=KIAA0409 PE=1 SV=2 - [HUCE1_HUMAN]	O43159	S106	Ribosomal RNA-processing protein 8 (EC 2.1.1.-) (Cerebral protein 1) (Nucleomethylin)	RRP8 KIAA0409 NML hucep-1	QGPPCSDSEEEVERK	0.462	0.718907	-1.11404	-0.476122	0.467611	0.643422	-1.09662	-0.636163	2950000	7520000	1360000	10500000	4310000	18020000	6.63448	7.25575	72931	31320
O43159	1	Cerebral protein 1 OS=Homo sapiens GN=KIAA0409 PE=1 SV=2 - [HUCE1_HUMAN]	O43159	S126	Ribosomal RNA-processing protein 8 (EC 2.1.1.-) (Cerebral protein 1) (Nucleomethylin)	RRP8 KIAA0409 NML hucep-1	QALVGSDSAEDEKRK	1.319	0.868056	0.399445	-0.204141	1.33502	0.77691	0.416862	-0.364181	6360000	7810000	8390000	8990000	14750000	16800000	7.16879	7.22531	104221	26306
O43159	1	Cerebral protein 1 OS=Homo sapiens GN=KIAA0409 PE=1 SV=2 - [HUCE1_HUMAN]	O43159	S176	Ribosomal RNA-processing protein 8 (EC 2.1.1.-) (Cerebral protein 1) (Nucleomethylin)	RRP8 KIAA0409 NML hucep-1	KQSPGSTSPKPPHTL	0.996	1.24378	-0.00578235	0.314733	1.0081	1.11318	0.0116347	0.154692	36200000	54500000	36000000	43800000	72200000	98300000	7.85854	7.99255	47501	72522
O43159	1	Cerebral protein 1 OS=Homo sapiens GN=KIAA0409 PE=1 SV=2 - [HUCE1_HUMAN]	O43159	S223	Ribosomal RNA-processing protein 8 (EC 2.1.1.-) (Cerebral protein 1) (Nucleomethylin)	RRP8 KIAA0409 NML hucep-1	PTEKTEVSPVPRTDS	0.97	1.21803	-0.0439433	0.284546	0.981781	1.09013	-0.0265263	0.124505	15100000	28400000	14700000	23300000	29800000	51700000	7.47422	7.71349	3544	113804
O43164	1	E3 ubiquitin-protein ligase Praja2 OS=Homo sapiens GN=PJA2 PE=1 SV=3 - [PJA2_HUMAN]	O43164	S309	E3 ubiquitin-protein ligase Praja-2 (Praja2) (EC 6.3.2.-) (RING finger protein 131)	PJA2 KIAA0438 RNF131	REKNHGSSPEQVVRP	0.981	1.16822	-0.027675	0.224317	0.992915	1.04556	-0.0102579	0.0642769	25800000	26800000	25300000	22900000	51100000	49700000	7.70842	7.69636	91548	168673
O43166	1	Signal-induced proliferation-associated 1-like protein 1 OS=Homo sapiens GN=SIPA1L1 PE=1 SV=4 - [SI1L1_HUMAN]	O43166	S1181	Signal-induced proliferation-associated 1-like protein 1 (SIPA1-like protein 1) (High-risk human papilloma viruses E6 oncoproteins targeted protein 1) (E6-targeted protein 1)	SIPA1L1 E6TP1 KIAA0440	GFGVSRRSPASIDRQ	0.877	1.13636	-0.189351	0.184425	0.887652	1.01705	-0.171934	0.0243842	31500000	17000000	27600000	15000000	59100000	32000000	7.77159	7.50515	48139	73357
O43166	1	Signal-induced proliferation-associated 1-like protein 1 OS=Homo sapiens GN=SIPA1L1 PE=1 SV=4 - [SI1L1_HUMAN]	O43166	S1255	Signal-induced proliferation-associated 1-like protein 1 (SIPA1-like protein 1) (High-risk human papilloma viruses E6 oncoproteins targeted protein 1) (E6-targeted protein 1)	SIPA1L1 E6TP1 KIAA0440	VLPAFRESPSGRLMR	0.756	0.761615	-0.403542	-0.392867	0.765182	0.681645	-0.386125	-0.552907	3940000	2480000	2980000	3250000	6920000	5730000	6.84011	6.75815	41047	135751
O43166	1	Signal-induced proliferation-associated 1-like protein 1 OS=Homo sapiens GN=SIPA1L1 PE=1 SV=4 - [SI1L1_HUMAN]	O43166	S1528	Signal-induced proliferation-associated 1-like protein 1 (SIPA1-like protein 1) (High-risk human papilloma viruses E6 oncoproteins targeted protein 1) (E6-targeted protein 1)	SIPA1L1 E6TP1 KIAA0440	STRDLRASPKPTSKS	0.864	0.968992	-0.210897	-0.045443	0.874494	0.867248	-0.19348	-0.205483	31000000	61900000	26800000	63900000	57800000	125800000	7.76193	8.09968	86757	67733	CMGC/GSK	GSK3A
O43166	1	Signal-induced proliferation-associated 1-like protein 1 OS=Homo sapiens GN=SIPA1L1 PE=1 SV=4 - [SI1L1_HUMAN]	O43166	S1549	Signal-induced proliferation-associated 1-like protein 1 (SIPA1-like protein 1) (High-risk human papilloma viruses E6 oncoproteins targeted protein 1) (E6-targeted protein 1)	SIPA1L1 E6TP1 KIAA0440	KKLIDLESPTPESQK	1.021	1.1976	0.0299829	0.260152	1.0334	1.07186	0.0473999	0.100111	129000000	45200000	132000000	37700000	261000000	82900000	8.41664	7.91855	5233	23970	CMGC/GSK	GSK3A
O43166	1	Signal-induced proliferation-associated 1-like protein 1 OS=Homo sapiens GN=SIPA1L1 PE=1 SV=4 - [SI1L1_HUMAN]	O43166	S1568	Signal-induced proliferation-associated 1-like protein 1 (SIPA1-like protein 1) (High-risk human papilloma viruses E6 oncoproteins targeted protein 1) (E6-targeted protein 1)	SIPA1L1 E6TP1 KIAA0440	HALSSPQSPFPSTPT	0.917	0.83682	-0.125006	-0.257011	0.928138	0.748954	-0.107589	-0.417051	29500000	13500000	27000000	16100000	56500000	29600000	7.75205	7.47129	41171	61297	CMGC/GSK	GSK3A
O43166	1	Signal-induced proliferation-associated 1-like protein 1 OS=Homo sapiens GN=SIPA1L1 PE=1 SV=4 - [SI1L1_HUMAN]	O43166	S1585	Signal-induced proliferation-associated 1-like protein 1 (SIPA1-like protein 1) (High-risk human papilloma viruses E6 oncoproteins targeted protein 1) (E6-targeted protein 1)	SIPA1L1 E6TP1 KIAA0440	RALHRTLSDESIYNS	1.027	1.18624	0.0384362	0.246395	1.03947	1.06168	0.0558532	0.0863551	291000000	145000000	299000000	122000000	590000000	267000000	8.77085	8.42651	4508	116082	CK1	CK1d, CK1e
O43166	1	Signal-induced proliferation-associated 1-like protein 1 OS=Homo sapiens GN=SIPA1L1 PE=1 SV=4 - [SI1L1_HUMAN]	O43166	S1588	Signal-induced proliferation-associated 1-like protein 1 (SIPA1-like protein 1) (High-risk human papilloma viruses E6 oncoproteins targeted protein 1) (E6-targeted protein 1)	SIPA1L1 E6TP1 KIAA0440	HRTLSDESIYNSQRE	0.879	0.831255	-0.186065	-0.266637	0.889676	0.743973	-0.168648	-0.426677	5760000	11700000	5060000	14100000	10820000	25800000	7.03423	7.41162	20705	96810	CK1	CK1d, CK1e
O43166	1	Signal-induced proliferation-associated 1-like protein 1 OS=Homo sapiens GN=SIPA1L1 PE=1 SV=4 - [SI1L1_HUMAN]	O43166	S162	Signal-induced proliferation-associated 1-like protein 1 (SIPA1-like protein 1) (High-risk human papilloma viruses E6 oncoproteins targeted protein 1) (E6-targeted protein 1)	SIPA1L1 E6TP1 KIAA0440	MPEAYPSSPRKALRR	0.748	0.631313	-0.41889	-0.663572	0.757085	0.565025	-0.401473	-0.823613	8760000	6350000	6550000	10100000	15310000	16450000	7.18498	7.21617	80210	52735	CMGC/GSK	GSK3A
O43166	1	Signal-induced proliferation-associated 1-like protein 1 OS=Homo sapiens GN=SIPA1L1 PE=1 SV=4 - [SI1L1_HUMAN]	O43166	S1632	Signal-induced proliferation-associated 1-like protein 1 (SIPA1-like protein 1) (High-risk human papilloma viruses E6 oncoproteins targeted protein 1) (E6-targeted protein 1)	SIPA1L1 E6TP1 KIAA0440	SLPLRRPSYTLGMKS	1.035	1.33869	0.0496308	0.42082	1.04757	1.19813	0.0670478	0.260779	3350000	27300000	3460000	20400000	6810000	47700000	6.83315	7.67852	48777	166888
O43166	1	Signal-induced proliferation-associated 1-like protein 1 OS=Homo sapiens GN=SIPA1L1 PE=1 SV=4 - [SI1L1_HUMAN]	O43166	S208	Signal-induced proliferation-associated 1-like protein 1 (SIPA1-like protein 1) (High-risk human papilloma viruses E6 oncoproteins targeted protein 1) (E6-targeted protein 1)	SIPA1L1 E6TP1 KIAA0440	SLHREYGSTSSIDKQ	2.185	0.496524	1.12763	-1.01006	2.21154	0.444389	1.14505	-1.1701	11200000	17000000	24500000	34200000	35700000	51200000	7.55267	7.70927	104049	113638	CK1	CK1d, CK1e
O43166	1	Signal-induced proliferation-associated 1-like protein 1 OS=Homo sapiens GN=SIPA1L1 PE=1 SV=4 - [SI1L1_HUMAN]	O43166	S288	Signal-induced proliferation-associated 1-like protein 1 (SIPA1-like protein 1) (High-risk human papilloma viruses E6 oncoproteins targeted protein 1) (E6-targeted protein 1)	SIPA1L1 E6TP1 KIAA0440	PLKRRSKSETGDSSI	1.228	1.20773	0.296311	0.272297	1.24291	1.08092	0.313728	0.112257	19100000	13700000	23400000	11300000	42500000	25000000	7.62839	7.39794	48034	73044
O43237	1	Cytoplasmic dynein 1 light intermediate chain 2 OS=Homo sapiens GN=DYNC1LI2 PE=1 SV=1 - [DC1L2_HUMAN]	O43237	S194	Cytoplasmic dynein 1 light intermediate chain 2 (Dynein light intermediate chain 2, cytosolic) (LIC-2) (LIC53/55)	DYNC1LI2 DNCLI2 LIC2	PEEGCQGSPQRRGPL	1.078	1.07411	0.108357	0.103147	1.09109	0.961332	0.125774	-0.0568935	545000000	214000000	587000000	199000000	1132000000	413000000	9.05385	8.61595	76250	124565
O43237	1	Cytoplasmic dynein 1 light intermediate chain 2 OS=Homo sapiens GN=DYNC1LI2 PE=1 SV=1 - [DC1L2_HUMAN]	O43237	S383	Cytoplasmic dynein 1 light intermediate chain 2 (Dynein light intermediate chain 2, cytosolic) (LIC-2) (LIC53/55)	DYNC1LI2 DNCLI2 LIC2	TPTRASESPARGPSG	0.596	0.783085	-0.746616	-0.352759	0.603239	0.700861	-0.729199	-0.512799	44300000	15400000	26400000	19600000	70700000	35000000	7.84942	7.54407	34870	132996
O43237	1	Cytoplasmic dynein 1 light intermediate chain 2 OS=Homo sapiens GN=DYNC1LI2 PE=1 SV=1 - [DC1L2_HUMAN]	O43237	S391	Cytoplasmic dynein 1 light intermediate chain 2 (Dynein light intermediate chain 2, cytosolic) (LIC-2) (LIC53/55)	DYNC1LI2 DNCLI2 LIC2	PARGPSGSPRTQGRG	0.607	0.6035	-0.720232	-0.728574	0.614372	0.540133	-0.702815	-0.888614	61100000	14200000	37100000	23500000	98200000	37700000	7.99211	7.57634	39030	143380
O43237	1	Cytoplasmic dynein 1 light intermediate chain 2 OS=Homo sapiens GN=DYNC1LI2 PE=1 SV=1 - [DC1L2_HUMAN]	O43237	S446	Cytoplasmic dynein 1 light intermediate chain 2 (Dynein light intermediate chain 2, cytosolic) (LIC-2) (LIC53/55)	DYNC1LI2 DNCLI2 LIC2	KKTGSPGSPGAGGVQ	0.586	0.75188	-0.771027	-0.411426	0.593117	0.672932	-0.75361	-0.571467	50600000	50500000	29700000	67100000	80300000	117600000	7.90472	8.07041	35119	50299
O43237	1	Cytoplasmic dynein 1 light intermediate chain 2 OS=Homo sapiens GN=DYNC1LI2 PE=1 SV=1 - [DC1L2_HUMAN]	O43237	S486	Cytoplasmic dynein 1 light intermediate chain 2 (Dynein light intermediate chain 2, cytosolic) (LIC-2) (LIC53/55)	DYNC1LI2 DNCLI2 LIC2	PDSMVTNSSTENEA*	1.082	1.36986	0.1137	0.454032	1.09514	1.22603	0.131118	0.293991	753000	6090000	815000	4450000	1568000	10540000	6.19535	7.02284	72624	156456
O43237	1	Cytoplasmic dynein 1 light intermediate chain 2 OS=Homo sapiens GN=DYNC1LI2 PE=1 SV=1 - [DC1L2_HUMAN]	O43237	T410	Cytoplasmic dynein 1 light intermediate chain 2 (Dynein light intermediate chain 2, cytosolic) (LIC-2) (LIC53/55)	DYNC1LI2 DNCLI2 LIC2	VPSSSPGTSVKKPDP	0.725	0.779423	-0.463947	-0.359521	0.733806	0.697584	-0.44653	-0.519562	86300000	132000000	62600000	170000000	148900000	302000000	8.17289	8.48001	104044	26146
O43290	1	U4/U6.U5 tri-snRNP-associated protein 1 OS=Homo sapiens GN=SART1 PE=1 SV=1 - [SNUT1_HUMAN]	O43290	S598	U4/U6.U5 tri-snRNP-associated protein 1 (SNU66 homolog) (hSnu66) (Squamous cell carcinoma antigen recognized by T-cells 1) (SART-1) (hSART-1) (U4/U6.U5 tri-snRNP-associated 110 kDa protein) (allergen Hom s 1)	SART1	SANGGSESDGEENIG	0.993	1.23609	-0.0101344	0.305788	1.00506	1.1063	0.00728268	0.145748	70900000	72500000	70400000	58700000	141300000	131200000	8.15014	8.11793	68312	101586
O43293	1	Death-associated protein kinase 3 OS=Homo sapiens GN=DAPK3 PE=1 SV=1 - [DAPK3_HUMAN]	O43293	S312	Death-associated protein kinase 3 (DAP kinase 3) (EC 2.7.11.1) (DAP-like kinase) (Dlk) (MYPT1 kinase) (Zipper-interacting protein kinase) (ZIP-kinase)	DAPK3 ZIPK	YTIKSHSSLPPNNSY	0.875	1.02459	-0.192645	0.0350469	0.885628	0.917008	-0.175228	-0.124993	31400000	8370000	27500000	8170000	58900000	16540000	7.77012	7.21854	37152	135347
O43294	1	Transforming growth factor beta-1-induced transcript 1 protein OS=Homo sapiens GN=TGFB1I1 PE=1 SV=2 - [TGFI1_HUMAN]	O43294	S137	Transforming growth factor beta-1-induced transcript 1 protein (Androgen receptor coactivator 55 kDa protein) (Androgen receptor-associated protein of 55 kDa) (Hydrogen peroxide-inducible clone 5 protein) (Hic-5)	TGFB1I1 ARA55	SEDKKRPSLPSSPSP	0.903	1.36986	-0.147202	0.454032	0.913968	1.22603	-0.129785	0.293991	30100000	70200000	27200000	51200000	57300000	121400000	7.75815	8.08422	48364	166434	CMGC/MAPK	Erk2, Erk7
O43294	1	Transforming growth factor beta-1-induced transcript 1 protein OS=Homo sapiens GN=TGFB1I1 PE=1 SV=2 - [TGFI1_HUMAN]	O43294	S141	Transforming growth factor beta-1-induced transcript 1 protein (Androgen receptor coactivator 55 kDa protein) (Androgen receptor-associated protein of 55 kDa) (Hydrogen peroxide-inducible clone 5 protein) (Hic-5)	TGFB1I1 ARA55	KRPSLPSSPSPGLPK	0.973	1.92678	-0.0394883	0.946194	0.984818	1.72447	-0.0220712	0.786153	135000000	5570000	132000000	2890000	267000000	8460000	8.42651	6.92737	43258	84241	CMGC/DYRK	HIPK3
O43294	1	Transforming growth factor beta-1-induced transcript 1 protein OS=Homo sapiens GN=TGFB1I1 PE=1 SV=2 - [TGFI1_HUMAN]	O43294	S143	Transforming growth factor beta-1-induced transcript 1 protein (Androgen receptor coactivator 55 kDa protein) (Androgen receptor-associated protein of 55 kDa) (Hydrogen peroxide-inducible clone 5 protein) (Hic-5)	TGFB1I1 ARA55	PSLPSSPSPGLPKAS	0.818	1.49031	-0.289827	0.575615	0.827935	1.33383	-0.27241	0.415575	24100000	28200000	19700000	18900000	43800000	47100000	7.64147	7.67302	53284	84256	CMGC/DYRK	HIPK3
O43294	1	Transforming growth factor beta-1-induced transcript 1 protein OS=Homo sapiens GN=TGFB1I1 PE=1 SV=2 - [TGFI1_HUMAN]	O43294	S164	Transforming growth factor beta-1-induced transcript 1 protein (Androgen receptor coactivator 55 kDa protein) (Androgen receptor-associated protein of 55 kDa) (Hydrogen peroxide-inducible clone 5 protein) (Hic-5)	TGFB1I1 ARA55	ELDRLMASLSDFRVQ	1.23	1.27877	0.298658	0.354759	1.24494	1.1445	0.316075	0.194719	34900000	16400000	43000000	12800000	77900000	29200000	7.89154	7.46538	5903	111027
O43303	1	Centrosomal protein of 110 kDa OS=Homo sapiens GN=CEP110 PE=1 SV=3 - [CE110_HUMAN]	O43303	S372	Centriolar coiled-coil protein of 110 kDa (Centrosomal protein of 110 kDa) (CP110) (Cep110)	CCP110 CEP110 CP110 KIAA0419	PSPEPSMSPKMHRRR	0.754	1.08578	-0.407364	0.118727	0.763158	0.97177	-0.389947	-0.0413135	124000000	32100000	93600000	29600000	217600000	61700000	8.33766	7.79029	3549	108802	CMGC/CDK/CDC2	CDC2, CDK2
O43306	1	Adenylate cyclase type 6 OS=Homo sapiens GN=ADCY6 PE=1 SV=2 - [ADCY6_HUMAN]	O43306	S54	Adenylate cyclase type 6 (EC 4.6.1.1) (ATP pyrophosphate-lyase 6) (Adenylate cyclase type VI) (Adenylyl cyclase 6) (Ca(2+)-inhibitable adenylyl cyclase)	ADCY6 KIAA0422	LRDAEPPSPTPAGPP	1.125	0.93633	0.169925	-0.0949116	1.13866	0.838015	0.187342	-0.254952	53000000	21700000	59600000	23100000	112600000	44800000	8.05154	7.65128	3498	22419
O43314	1	Inositol hexakisphosphate and diphosphoinositol-pentakisphosphate kinase 2 OS=Homo sapiens GN=HISPPD1 PE=1 SV=3 - [VIP2_HUMAN]	O43314	S1006	Inositol hexakisphosphate and diphosphoinositol-pentakisphosphate kinase 2 (EC 2.7.4.21) (EC 2.7.4.24) (Diphosphoinositol pentakisphosphate kinase 2) (Histidine acid phosphatase domain-containing protein 1) (InsP6 and PP-IP5 kinase 2) (VIP1 homolog 2) (hsVIP2)	PPIP5K2 HISPPD1 KIAA0433 VIP2	TGRRRRRSGEQITSS	1.035	1.04822	0.0496308	0.0679388	1.04757	0.938155	0.0670478	-0.0921016	16200000	13200000	16700000	12600000	32900000	25800000	7.5172	7.41162	100216	17069
O43314	1	Inositol hexakisphosphate and diphosphoinositol-pentakisphosphate kinase 2 OS=Homo sapiens GN=HISPPD1 PE=1 SV=3 - [VIP2_HUMAN]	O43314	S1108	Inositol hexakisphosphate and diphosphoinositol-pentakisphosphate kinase 2 (EC 2.7.4.21) (EC 2.7.4.24) (Diphosphoinositol pentakisphosphate kinase 2) (Histidine acid phosphatase domain-containing protein 1) (InsP6 and PP-IP5 kinase 2) (VIP1 homolog 2) (hsVIP2)	PPIP5K2 HISPPD1 KIAA0433 VIP2	GSAVKRFSISFARHP	1.475	1.2837	0.560715	0.360305	1.49291	1.14891	0.578132	0.200264	2550000	4200000	3760000	3270000	6310000	7470000	6.80003	6.87332	41387	67003
O43314	1	Inositol hexakisphosphate and diphosphoinositol-pentakisphosphate kinase 2 OS=Homo sapiens GN=HISPPD1 PE=1 SV=3 - [VIP2_HUMAN]	O43314	S1172	Inositol hexakisphosphate and diphosphoinositol-pentakisphosphate kinase 2 (EC 2.7.4.21) (EC 2.7.4.24) (Diphosphoinositol pentakisphosphate kinase 2) (Histidine acid phosphatase domain-containing protein 1) (InsP6 and PP-IP5 kinase 2) (VIP1 homolog 2) (hsVIP2)	PPIP5K2 HISPPD1 KIAA0433 VIP2	SSTALRSSPIMRKKV	0.937	1.04058	-0.093879	0.0573917	0.948381	0.931322	-0.076462	-0.102649	132000000	240000000	123000000	230000000	255000000	470000000	8.40654	8.6721	36690	51702
O43318	1	Mitogen-activated protein kinase kinase kinase 7 OS=Homo sapiens GN=MAP3K7 PE=1 SV=1 - [M3K7_HUMAN]	O43318	S389	Mitogen-activated protein kinase kinase kinase 7 (EC 2.7.11.25) (Transforming growth factor-beta-activated kinase 1) (TGF-beta-activated kinase 1)	MAP3K7 TAK1	TSEGKRMSADMSEIE	1.102	1.15473	0.140124	0.207561	1.11538	1.03349	0.157541	0.0475207	75400000	71200000	83000000	61700000	158400000	132900000	8.19976	8.12352	39290	158910	STE/STE-Unique/NIK	NIK
O43318	1	Mitogen-activated protein kinase kinase kinase 7 OS=Homo sapiens GN=MAP3K7 PE=1 SV=1 - [M3K7_HUMAN]	O43318	S439	Mitogen-activated protein kinase kinase kinase 7 (EC 2.7.11.25) (Transforming growth factor-beta-activated kinase 1) (TGF-beta-activated kinase 1)	MAP3K7 TAK1	NGQPRRRSIQDLTVT	1.057	1.287	0.0799754	0.364013	1.06984	1.15187	0.0973924	0.203973	120000000	32600000	126000000	25300000	246000000	57900000	8.39094	7.76268	50801	14956	TKL/IRAK	IRAK1, IRAK2
O43379	1	WD repeat-containing protein 62 OS=Homo sapiens GN=WDR62 PE=1 SV=2 - [WDR62_HUMAN]	O43379	S1144	WD repeat-containing protein 62	WDR62 C19orf14	RAGTGYASPDRTHVL	0.893	1.18343	-0.163268	0.242977	0.903846	1.05917	-0.145851	0.0829363	9400000	19800000	8400000	16700000	17800000	36500000	7.25042	7.56229	87481	68372	CMGC/MAPK	JNK2
O43395	1	U4/U6 small nuclear ribonucleoprotein Prp3 OS=Homo sapiens GN=PRPF3 PE=1 SV=2 - [PRPF3_HUMAN]	O43395	S619	U4/U6 small nuclear ribonucleoprotein Prp3 (Pre-mRNA-splicing factor 3) (hPrp3) (U4/U6 snRNP 90 kDa protein)	PRPF3 HPRP3 PRP3	KGDDDEESDEEAVKK	0.768	1.24533	-0.380822	0.316528	0.777328	1.11457	-0.363405	0.156488	195000000	31800000	150000000	25500000	345000000	57300000	8.53782	7.75815	87787	65593	Other/CK2	CK2a2
O43396	1	Thioredoxin-like protein 1 OS=Homo sapiens GN=TXNL1 PE=1 SV=3 - [TXNL1_HUMAN]	O43396	S113	Thioredoxin-like protein 1 (32 kDa thioredoxin-related protein)	TXNL1 TRP32 TXL TXNL	HLENDPGSNEDTDIP	1.062	1.1325	0.0867838	0.179515	1.0749	1.01359	0.104201	0.0194742	31000000	7390000	32900000	6530000	63900000	13920000	7.8055	7.14364	36145	169253
O43399	1	Tumor protein D54 OS=Homo sapiens GN=TPD52L2 PE=1 SV=2 - [TPD54_HUMAN]	O43399	S166	Tumor protein D54 (hD54) (Tumor protein D52-like 2)	TPD52L2	RNSATFKSFEDRVGT	1.237	1.3245	0.306846	0.405451	1.25202	1.18543	0.324263	0.245411	1280000000	908000000	1590000000	685000000	2870000000	1593000000	9.45788	9.20222	40512	60618
O43399	1	Tumor protein D54 OS=Homo sapiens GN=TPD52L2 PE=1 SV=2 - [TPD54_HUMAN]	O43399	S21	Tumor protein D54 (hD54) (Tumor protein D52-like 2)	TPD52L2	NKGLLSDSMTDVPVD	0.926	1.00908	-0.110916	0.013043	0.937247	0.903128	-0.0934988	-0.146997	78500000	53400000	72700000	52900000	151200000	106300000	8.17955	8.02653	6561	24998
O43426	1	Synaptojanin-1 OS=Homo sapiens GN=SYNJ1 PE=1 SV=1 - [SYNJ1_HUMAN]	O43426	S1345	Synaptojanin-1 (EC 3.1.3.36) (Synaptic inositol 1,4,5-trisphosphate 5-phosphatase 1)	SYNJ1 KIAA0910	AQLSVQTSPVPTPDP	0.915	0.92081	-0.128156	-0.119024	0.926113	0.824125	-0.110739	-0.279065	30700000	25500000	28100000	27600000	58800000	53100000	7.76938	7.72509	4991	23775	CMGC/DYRK	DYRK1A
O43426	1	Synaptojanin-1 OS=Homo sapiens GN=SYNJ1 PE=1 SV=1 - [SYNJ1_HUMAN]	O43426	S1394	Synaptojanin-1 (EC 3.1.3.36) (Synaptic inositol 1,4,5-trisphosphate 5-phosphatase 1)	SYNJ1 KIAA0910	SQENMRSSPNPFITG	1.351	1.07875	0.434028	0.109359	1.36741	0.96548	0.451445	-0.0506817	8140000	38800000	11000000	36000000	19140000	74800000	7.28194	7.8739	72012	29794
O43426	1	Synaptojanin-1 OS=Homo sapiens GN=SYNJ1 PE=1 SV=1 - [SYNJ1_HUMAN]	O43426	S1567	Synaptojanin-1 (EC 3.1.3.36) (Synaptic inositol 1,4,5-trisphosphate 5-phosphatase 1)	SYNJ1 KIAA0910	TTLASKASPTLDFTE	1.032	1.27226	0.045443	0.347399	1.04453	1.13868	0.06286	0.187358	54400000	23900000	56100000	18800000	110500000	42700000	8.04336	7.63043	5303	28378	CMGC/DYRK	DYRK1A
O43426	1	Synaptojanin-1 OS=Homo sapiens GN=SYNJ1 PE=1 SV=1 - [SYNJ1_HUMAN]	O43426	T1220	Synaptojanin-1 (EC 3.1.3.36) (Synaptic inositol 1,4,5-trisphosphate 5-phosphatase 1)	SYNJ1 KIAA0910	RASAGRLTPESQSKT	1.035	0.99108	0.0496308	-0.0129262	1.04757	0.887017	0.0670478	-0.172967	76200000	100000000	78800000	101000000	155000000	201000000	8.19033	8.3032	34948	133295	CMGC/DYRK	DYRK1A
O43432	1	Eukaryotic translation initiation factor 4 gamma 3 OS=Homo sapiens GN=EIF4G3 PE=1 SV=2 - [IF4G3_HUMAN]	O43432	S1156	Eukaryotic translation initiation factor 4 gamma 3 (eIF-4-gamma 3) (eIF-4G 3) (eIF4G 3) (eIF-4-gamma II) (eIF4GII)	EIF4G3	NTFMRGGSSKDLLDN	0.829	1.04932	-0.270556	0.0694519	0.839069	0.93914	-0.253139	-0.0905885	510000000	222000000	423000000	212000000	933000000	434000000	8.96988	8.63749	45249	68235	CAMK/CAMK1	CaMK1a
O43432	1	Eukaryotic translation initiation factor 4 gamma 3 OS=Homo sapiens GN=EIF4G3 PE=1 SV=2 - [IF4G3_HUMAN]	O43432	S1165	Eukaryotic translation initiation factor 4 gamma 3 (eIF-4-gamma 3) (eIF-4G 3) (eIF4G 3) (eIF-4-gamma II) (eIF4GII)	EIF4G3	KDLLDNQSQEEQRRE	0.854	1.08342	-0.227692	0.115597	0.864372	0.969664	-0.210275	-0.044443	34900000	17900000	29800000	16500000	64700000	34400000	7.8109	7.53656	86974	147644
O43432	1	Eukaryotic translation initiation factor 4 gamma 3 OS=Homo sapiens GN=EIF4G3 PE=1 SV=2 - [IF4G3_HUMAN]	O43432	S1409	Eukaryotic translation initiation factor 4 gamma 3 (eIF-4-gamma 3) (eIF-4G 3) (eIF4G 3) (eIF-4-gamma II) (eIF4GII)	EIF4G3	LDFIESDSPCSSEAL	2.454	1.13507	1.29514	0.182786	2.48381	1.01589	1.31255	0.0227457	1900000	10600000	4650000	9350000	6550000	19950000	6.81624	7.29994	6496	125897
O43432	1	Eukaryotic translation initiation factor 4 gamma 3 OS=Homo sapiens GN=EIF4G3 PE=1 SV=2 - [IF4G3_HUMAN]	O43432	S1412	Eukaryotic translation initiation factor 4 gamma 3 (eIF-4-gamma 3) (eIF-4G 3) (eIF4G 3) (eIF-4-gamma II) (eIF4GII)	EIF4G3	IESDSPCSSEALSKK	1.084	1.08696	0.116365	0.120294	1.09717	0.972826	0.133782	-0.0397462	14300000	14800000	15400000	13600000	29700000	28400000	7.47276	7.45332	76537	49026
O43432	1	Eukaryotic translation initiation factor 4 gamma 3 OS=Homo sapiens GN=EIF4G3 PE=1 SV=2 - [IF4G3_HUMAN]	O43432	S232	Eukaryotic translation initiation factor 4 gamma 3 (eIF-4-gamma 3) (eIF-4G 3) (eIF4G 3) (eIF-4-gamma II) (eIF4GII)	EIF4G3	DPVLKSPSPVLRLVL	1.088	0.207684	0.121679	-2.26754	1.10121	0.185877	0.139096	-2.42758	44600000	7780000	48500000	37500000	93100000	45280000	7.96895	7.65591	104210	114007
O43432	1	Eukaryotic translation initiation factor 4 gamma 3 OS=Homo sapiens GN=EIF4G3 PE=1 SV=2 - [IF4G3_HUMAN]	O43432	S495	Eukaryotic translation initiation factor 4 gamma 3 (eIF-4-gamma 3) (eIF-4G 3) (eIF4G 3) (eIF-4-gamma II) (eIF4GII)	EIF4G3	QNLNSRRSPVPAQIA	1.243	1.16959	0.313826	0.226004	1.2581	1.04678	0.331243	0.0659633	11600000	54900000	14400000	47000000	26000000	101900000	7.41497	8.00817	37784	55688	Atypical/PIKK/FRAP	FRAP
O43491	1	Band 4.1-like protein 2 OS=Homo sapiens GN=EPB41L2 PE=1 SV=1 - [E41L2_HUMAN]	O43491	S39	Band 4.1-like protein 2 (Generally expressed protein 4.1) (4.1G)	EPB41L2	ENQQNQSSDPEEEKG	1.898	0.734754	0.92448	-0.444667	1.92105	0.657605	0.941897	-0.604707	35700000	16000000	67700000	21800000	103400000	37800000	8.01452	7.57749	2984	22064
O43491	1	Band 4.1-like protein 2 OS=Homo sapiens GN=EPB41L2 PE=1 SV=1 - [E41L2_HUMAN]	O43491	S499	Band 4.1-like protein 2 (Generally expressed protein 4.1) (4.1G)	EPB41L2	HTFYRLVSPEQPPKA	0.946	1.08932	-0.0800879	0.123434	0.95749	0.974946	-0.0626709	-0.0366065	42700000	78500000	40400000	72100000	83100000	150600000	7.9196	8.17782	3449	113420
O43491	1	Band 4.1-like protein 2 OS=Homo sapiens GN=EPB41L2 PE=1 SV=1 - [E41L2_HUMAN]	O43491	S58	Band 4.1-like protein 2 (Generally expressed protein 4.1) (4.1G)	EPB41L2	PAAESQSSLRRQKRE	0.766	0.786782	-0.384584	-0.345964	0.775304	0.70417	-0.367167	-0.506004	457000000	277000000	350000000	352000000	807000000	629000000	8.90687	8.79865	35188	50617
O43491	1	Band 4.1-like protein 2 OS=Homo sapiens GN=EPB41L2 PE=1 SV=1 - [E41L2_HUMAN]	O43491	S614	Band 4.1-like protein 2 (Generally expressed protein 4.1) (4.1G)	EPB41L2	LIEGKKNSLRVEGDN	0.86	0.628536	-0.217591	-0.669934	0.870445	0.562539	-0.200174	-0.829974	2120000	2520000	1830000	4000000	3950000	6520000	6.5966	6.81425	51137	79193
O43491	1	Band 4.1-like protein 2 OS=Homo sapiens GN=EPB41L2 PE=1 SV=1 - [E41L2_HUMAN]	O43491	S683	Band 4.1-like protein 2 (Generally expressed protein 4.1) (4.1G)	EPB41L2	SLQTQGSSHETLNIV	1.311	1.41443	0.390668	0.500218	1.32692	1.26591	0.408085	0.340177	7970000	39900000	10500000	28200000	18470000	68100000	7.26647	7.83315	77019	45652
O43491	1	Band 4.1-like protein 2 OS=Homo sapiens GN=EPB41L2 PE=1 SV=1 - [E41L2_HUMAN]	O43491	S715	Band 4.1-like protein 2 (Generally expressed protein 4.1) (4.1G)	EPB41L2	EMNGKEISPGSGPGE	1.01	1.24533	0.0143553	0.316528	1.02227	1.11457	0.0317723	0.156488	82100000	19500000	82900000	15700000	165000000	35200000	8.21748	7.54654	4321	109479
O43491	1	Band 4.1-like protein 2 OS=Homo sapiens GN=EPB41L2 PE=1 SV=1 - [E41L2_HUMAN]	O43491	S718	Band 4.1-like protein 2 (Generally expressed protein 4.1) (4.1G)	EPB41L2	GKEISPGSGPGEIRK	0.928	0.929368	-0.107803	-0.105678	0.939271	0.831784	-0.0903862	-0.265718	159000000	45400000	148000000	48800000	307000000	94200000	8.48714	7.97405	4291	26958
O43491	1	Band 4.1-like protein 2 OS=Homo sapiens GN=EPB41L2 PE=1 SV=1 - [E41L2_HUMAN]	O43491	S87	Band 4.1-like protein 2 (Generally expressed protein 4.1) (4.1G)	EPB41L2	PWLKKQKSYTLVVAK	1.007	1.23457	0.0100637	0.304006	1.01923	1.10494	0.0274807	0.143966	29100000	495000000	29300000	401000000	58400000	896000000	7.76641	8.95231	36450	18934
O43491	1	Band 4.1-like protein 2 OS=Homo sapiens GN=EPB41L2 PE=1 SV=1 - [E41L2_HUMAN]	O43491	T686	Band 4.1-like protein 2 (Generally expressed protein 4.1) (4.1G)	EPB41L2	TQGSSHETLNIVEEK	1.116	1.18203	0.158337	0.24127	1.12955	1.05792	0.175754	0.08123	44000000	298000000	49100000	253000000	93100000	551000000	7.96895	8.74115	76727	49261
O43493	1	Trans-Golgi network integral membrane protein 2 OS=Homo sapiens GN=TGOLN2 PE=1 SV=2 - [TGON2_HUMAN]	O43493	S224	Trans-Golgi network integral membrane protein 2 (TGN38 homolog) (TGN46) (TGN48) (Trans-Golgi network protein TGN51)	TGOLN2 TGN46 TGN51	PKDGSNKSGAEEQGP	0.903	2.33645	-0.147202	1.22432	0.913968	2.09112	-0.129785	1.06428	7750000	1710000	7000000	735000	14750000	2445000	7.16879	6.38828	30020	40683
O43493	1	Trans-Golgi network integral membrane protein 2 OS=Homo sapiens GN=TGOLN2 PE=1 SV=2 - [TGON2_HUMAN]	O43493	S298	Trans-Golgi network integral membrane protein 2 (TGN38 homolog) (TGN46) (TGN48) (Trans-Golgi network protein TGN51)	TGOLN2 TGN46 TGN51	PHAFKTESGEETDLI	1.063	1.46413	0.0881416	0.550043	1.07591	1.3104	0.105559	0.390002	39400000	46500000	41900000	31700000	81300000	78200000	7.91009	7.89321	67703	101275	Other/CK2	CK2a2
O43493	1	Trans-Golgi network integral membrane protein 2 OS=Homo sapiens GN=TGOLN2 PE=1 SV=2 - [TGON2_HUMAN]	O43493	S71	Trans-Golgi network integral membrane protein 2 (TGN38 homolog) (TGN46) (TGN48) (Trans-Golgi network protein TGN51)	TGOLN2 TGN46 TGN51	KDSPSKSSAEAQTPE	1.05	1.06838	0.0703893	0.0954196	1.06275	0.956197	0.0878064	-0.0646208	282000000	74500000	296000000	69700000	578000000	144200000	8.76193	8.15897	74337	43019	Other/CK2	CK2a2
O43493	1	Trans-Golgi network integral membrane protein 2 OS=Homo sapiens GN=TGOLN2 PE=1 SV=2 - [TGON2_HUMAN]	O43493	T296	Trans-Golgi network integral membrane protein 2 (TGN38 homolog) (TGN46) (TGN48) (Trans-Golgi network protein TGN51)	TGOLN2 TGN46 TGN51	LSPHAFKTESGEETD	1.368	1.57729	0.452068	0.657445	1.38462	1.41167	0.469485	0.497405	51300000	95400000	70200000	60500000	121500000	155900000	8.08458	8.19285	85773	64069	Other/CK2	CK2a2
O43516	1	WAS/WASL-interacting protein family member 1 OS=Homo sapiens GN=WIPF1 PE=1 SV=2 - [WIPF1_HUMAN]	O43516	T398	WAS/WASL-interacting protein family member 1 (Protein PRPL-2) (Wiskott-Aldrich syndrome protein-interacting protein) (WASP-interacting protein)	WIPF1 WASPIP WIP	TSRALPATPQLPSRS	0.554	0.445434	-0.852042	-1.16672	0.560729	0.398664	-0.834625	-1.32676	6510000	9100000	3610000	20400000	10120000	29500000	7.00518	7.46982	11103	23823
O43572	1	A kinase anchor protein 10, mitochondrial OS=Homo sapiens GN=AKAP10 PE=2 SV=2 - [AKA10_HUMAN]	O43572	S187	A-kinase anchor protein 10, mitochondrial (AKAP-10) (Dual specificity A kinase-anchoring protein 2) (D-AKAP-2) (Protein kinase A-anchoring protein 10) (PRKA10)	AKAP10	SSLAEPVSPSKKHET	1.01	1.52207	0.0143553	0.606035	1.02227	1.36225	0.0317723	0.445994	233000000	142000000	235000000	93500000	468000000	235500000	8.67025	8.37199	3680	114175
O43583	1	Density-regulated protein OS=Homo sapiens GN=DENR PE=1 SV=2 - [DENR_HUMAN]	O43583	S73	Density-regulated protein (DRP) (Protein DRP1) (Smooth muscle cell-associated protein 3) (SMAP-3)	DENR DRP1 H14	AKLTVENSPKQEAGI	0.962	1.08225	-0.0558912	0.114035	0.973684	0.968615	-0.0384741	-0.0460052	589000000	410000000	567000000	379000000	1156000000	789000000	9.06296	8.89708	75331	124332	CMGC/CDK/CDC2	CDC2
O43583	1	Density-regulated protein OS=Homo sapiens GN=DENR PE=1 SV=2 - [DENR_HUMAN]	O43583	T86	Density-regulated protein (DRP) (Protein DRP1) (Smooth muscle cell-associated protein 3) (SMAP-3)	DENR DRP1 H14	GISEGQGTAGEEEEK	1.387	1.3587	0.471968	0.442222	1.40385	1.21603	0.489385	0.282182	2270000	1700000	3140000	1250000	5410000	2950000	6.7332	6.46982	69379	127827
O43598	1	c-Myc-responsive protein Rcl OS=Homo sapiens GN=RCL PE=1 SV=1 - [RCL_HUMAN]	O43598	S169	Deoxyribonucleoside 5'-monophosphate N-glycosidase (EC 3.2.2.-) (c-Myc-responsive protein Rcl)	RCL C6orf108	PPGQVAASPDPTT**	1.053	1.25786	0.0745054	0.330973	1.06579	1.12579	0.0919225	0.170933	17700000	8900000	18700000	7070000	36400000	15970000	7.5611	7.2033	61977	96008
O43639	1	Cytoplasmic protein NCK2 OS=Homo sapiens GN=NCK2 PE=1 SV=2 - [NCK2_HUMAN]	O43639	S90	Cytoplasmic protein NCK2 (Growth factor receptor-bound protein 4) (NCK adaptor protein 2) (Nck-2) (SH2/SH3 adaptor protein NCK-beta)	NCK2 GRB4	KTSARDASPTPSTDA	0.868	0.859107	-0.204233	-0.219091	0.878543	0.7689	-0.186816	-0.379131	22000000	10400000	19000000	12100000	41000000	22500000	7.61278	7.35218	66492	16736	CMGC/GSK	GSK3A
O43684	1	Mitotic checkpoint protein BUB3 OS=Homo sapiens GN=BUB3 PE=1 SV=1 - [BUB3_HUMAN]	O43684	S211	Mitotic checkpoint protein BUB3	BUB3	AVEYLDPSPEVQKKK	1.004	1.37552	0.00575927	0.459973	1.01619	1.23109	0.0231763	0.299932	27200000	10000000	27300000	7300000	54500000	17300000	7.7364	7.23805	5798	24555	CMGC/CDK/CDC2	CDC2
O43719	1	HIV Tat-specific factor 1 OS=Homo sapiens GN=HTATSF1 PE=1 SV=1 - [HTSF1_HUMAN]	O43719	S453	HIV Tat-specific factor 1 (Tat-SF1)	HTATSF1	ENNAKESSPEKEAEE	1	1.08342	0	0.115597	1.01215	0.969664	0.0174171	-0.044443	35900000	6740000	35900000	6220000	71800000	12960000	7.85612	7.11261	74842	43395	CMGC/CDK/CDC2	CDK2, CDK3
O43719	1	HIV Tat-specific factor 1 OS=Homo sapiens GN=HTATSF1 PE=1 SV=1 - [HTSF1_HUMAN]	O43719	S498	HIV Tat-specific factor 1 (Tat-SF1)	HTATSF1	VRGSEEDSPKKESKK	1.015	1.14286	0.0214797	0.192645	1.02733	1.02286	0.0388968	0.0326047	501000000	258000000	508000000	226000000	1009000000	484000000	9.00389	8.68485	44769	67712	CMGC/CDK/CDC2	CDK2, CDK3
O43719	1	HIV Tat-specific factor 1 OS=Homo sapiens GN=HTATSF1 PE=1 SV=1 - [HTSF1_HUMAN]	O43719	S579	HIV Tat-specific factor 1 (Tat-SF1)	HTATSF1	KDLDEEGSEKELHEN	0.932	1.10254	-0.101598	0.140826	0.94332	0.98677	-0.0841811	-0.0192149	300000000	62100000	279000000	56400000	579000000	118500000	8.76268	8.07372	43439	63642
O43719	1	HIV Tat-specific factor 1 OS=Homo sapiens GN=HTATSF1 PE=1 SV=1 - [HTSF1_HUMAN]	O43719	S616	HIV Tat-specific factor 1 (Tat-SF1)	HTATSF1	KVLDEEGSEREFDED	1.126	1.04822	0.171207	0.0679388	1.13968	0.938155	0.188624	-0.0921016	29700000	95700000	33400000	91300000	63100000	187000000	7.80003	8.27184	30712	41443
O43719	1	HIV Tat-specific factor 1 OS=Homo sapiens GN=HTATSF1 PE=1 SV=1 - [HTSF1_HUMAN]	O43719	S624	HIV Tat-specific factor 1 (Tat-SF1)	HTATSF1	EREFDEDSDEKEEEE	1.126	1.04822	0.171207	0.0679388	1.13968	0.938155	0.188624	-0.0921016	29700000	95700000	33400000	91300000	63100000	187000000	7.80003	8.27184	30712	41443
O43719	1	HIV Tat-specific factor 1 OS=Homo sapiens GN=HTATSF1 PE=1 SV=1 - [HTSF1_HUMAN]	O43719	S642	HIV Tat-specific factor 1 (Tat-SF1)	HTATSF1	EKVFDDESDEKEDEE	1.383	1.10497	0.467801	0.14401	1.3998	0.98895	0.485218	-0.0160301	101000000	146000000	139000000	132000000	240000000	278000000	8.38021	8.44404	30439	124356
O43719	1	HIV Tat-specific factor 1 OS=Homo sapiens GN=HTATSF1 PE=1 SV=1 - [HTSF1_HUMAN]	O43719	S676	HIV Tat-specific factor 1 (Tat-SF1)	HTATSF1	DEKLFEESDDKEDED	1.19	1.13895	0.250962	0.187707	1.20445	1.01936	0.268379	0.0276667	440000000	280000000	523000000	246000000	963000000	526000000	8.98363	8.72099	40470	144877
O43719	1	HIV Tat-specific factor 1 OS=Homo sapiens GN=HTATSF1 PE=1 SV=1 - [HTSF1_HUMAN]	O43719	S702	HIV Tat-specific factor 1 (Tat-SF1)	HTATSF1	KLFEDDDSNEKLFDE	1.327	1.9685	0.408168	0.9771	1.34312	1.76181	0.425585	0.817059	211000000	98300000	280000000	50000000	491000000	148300000	8.69108	8.17114	3871	109020
O43719	1	HIV Tat-specific factor 1 OS=Homo sapiens GN=HTATSF1 PE=1 SV=1 - [HTSF1_HUMAN]	O43719	S713	HIV Tat-specific factor 1 (Tat-SF1)	HTATSF1	LFDEEEDSSEKLFDD	1.287	1.37363	0.364012	0.45799	1.30263	1.2294	0.381429	0.297949	89800000	58500000	116000000	42600000	205800000	101100000	8.31345	8.00475	4068	26741
O43741	1	5'-AMP-activated protein kinase subunit beta-2 OS=Homo sapiens GN=PRKAB2 PE=1 SV=1 - [AAKB2_HUMAN]	O43741	S184	5'-AMP-activated protein kinase subunit beta-2 (AMPK subunit beta-2)	PRKAB2	SCRDLSSSPPGPYGQ	1.02	1.18064	0.0285692	0.239566	1.03239	1.05667	0.0459862	0.0795257	112000000	40200000	114000000	34100000	226000000	74300000	8.35411	7.87099	6185	15815	Atypical/PIKK/FRAP	FRAP
O43741	1	5'-AMP-activated protein kinase subunit beta-2 OS=Homo sapiens GN=PRKAB2 PE=1 SV=1 - [AAKB2_HUMAN]	O43741	S39	5'-AMP-activated protein kinase subunit beta-2 (AMPK subunit beta-2)	PRKAB2	EHKIMVGSTDDPSVF	0.962	1.05042	-0.0558912	0.0709665	0.973684	0.940126	-0.0384741	-0.0890739	27500000	23400000	26500000	22200000	54000000	45600000	7.73239	7.65896	6620	20827	Atypical/PIKK/FRAP	FRAP
O43765	1	Small glutamine-rich tetratricopeptide repeat-containing protein alpha OS=Homo sapiens GN=SGTA PE=1 SV=1 - [SGTA_HUMAN]	O43765	S301	Small glutamine-rich tetratricopeptide repeat-containing protein alpha (Alpha-SGT) (Vpu-binding protein) (UBP)	SGTA SGT SGT1	QLRSQIRSRTPSASN	0.885	1.05042	-0.176251	0.0709665	0.895749	0.940126	-0.158834	-0.0890739	20500000	43900000	18100000	41800000	38600000	85700000	7.58659	7.93298	72648	31072	AGC/AKT	AKT1
O43765	1	Small glutamine-rich tetratricopeptide repeat-containing protein alpha OS=Homo sapiens GN=SGTA PE=1 SV=1 - [SGTA_HUMAN]	O43765	S305	Small glutamine-rich tetratricopeptide repeat-containing protein alpha (Alpha-SGT) (Vpu-binding protein) (UBP)	SGTA SGT SGT1	QIRSRTPSASNDDQQ	0.885	2.34742	-0.176251	1.23107	0.895749	2.10094	-0.158834	1.07103	20500000	169000	18100000	71900	38600000	240900	7.58659	5.38184	72648	21748	AGC/AKT	AKT1
O43765	1	Small glutamine-rich tetratricopeptide repeat-containing protein alpha OS=Homo sapiens GN=SGTA PE=1 SV=1 - [SGTA_HUMAN]	O43765	T81	Small glutamine-rich tetratricopeptide repeat-containing protein alpha (Alpha-SGT) (Vpu-binding protein) (UBP)	SGTA SGT SGT1	DLRSPARTPPSEEDS	1.083	1.0989	0.115033	0.136062	1.09615	0.983516	0.13245	-0.0239789	55600000	54900000	60200000	50000000	115800000	104900000	8.06371	8.02078	77606	50626	Atypical/PIKK/FRAP	FRAP
O43815	1	Striatin OS=Homo sapiens GN=STRN PE=1 SV=4 - [STRN_HUMAN]	O43815	S245	Striatin	STRN	ESAAADFSDEDEDDD	0.943	1.26743	-0.0846703	0.341903	0.954453	1.13435	-0.0672533	0.181862	269000000	216000000	254000000	171000000	523000000	387000000	8.7185	8.58771	76182	125349
O43823	1	A-kinase anchor protein 8 OS=Homo sapiens GN=AKAP8 PE=1 SV=1 - [AKAP8_HUMAN]	O43823	S328	A-kinase anchor protein 8 (AKAP-8) (A-kinase anchor protein 95 kDa) (AKAP 95)	AKAP8 AKAP95	VDSEGDFSENDDAAG	0.924	1.49925	-0.114035	0.584241	0.935223	1.34183	-0.0966182	0.424201	6610000	7690000	6120000	5130000	12730000	12820000	7.10483	7.10789	67478	100866
O43847	1	Nardilysin OS=Homo sapiens GN=NRD1 PE=2 SV=2 - [NRDC_HUMAN]	O43847	S94	Nardilysin (EC 3.4.24.61) (N-arginine dibasic convertase) (NRD convertase) (NRD-C)	NRD1	EEEGRRGSLSNAGDP	1.218	1.19904	0.284514	0.261881	1.23279	1.07314	0.301931	0.10184	33400000	28400000	40600000	23700000	74000000	52100000	7.86923	7.71684	40131	144630
O43847	1	Nardilysin OS=Homo sapiens GN=NRD1 PE=2 SV=2 - [NRDC_HUMAN]	O43847	S96	Nardilysin (EC 3.4.24.61) (N-arginine dibasic convertase) (NRD convertase) (NRD-C)	NRD1	EGRRGSLSNAGDPEI	0.994	1.10619	-0.00868224	0.145605	1.00607	0.990044	0.00873481	-0.0144351	732000000	20100000	728000000	18200000	1460000000	38300000	9.16435	7.5832	43356	159688
O43896	1	Kinesin-like protein KIF1C OS=Homo sapiens GN=KIF1C PE=1 SV=3 - [KIF1C_HUMAN]	O43896	S1092	Kinesin-like protein KIF1C	KIF1C KIAA0706	PRMRRQRSAPDLKES	0.989	0.930233	-0.0159576	-0.104337	1.00101	0.832558	0.00145948	-0.264377	11000000	30500000	10900000	32800000	21900000	63300000	7.34044	7.8014	81417	108610	Other/CK2	CK2a1, CK2a2
O43896	1	Kinesin-like protein KIF1C OS=Homo sapiens GN=KIF1C PE=1 SV=3 - [KIF1C_HUMAN]	O43896	S915	Kinesin-like protein KIF1C	KIF1C KIAA0706	MPSARPPSPPLSSWE	1.06	1.3459	0.0840643	0.428566	1.07287	1.20458	0.101481	0.268525	98400000	56100000	104000000	41700000	202400000	97800000	8.30621	7.99034	38187	52783
O43896	1	Kinesin-like protein KIF1C OS=Homo sapiens GN=KIF1C PE=1 SV=3 - [KIF1C_HUMAN]	O43896	Y1078	Kinesin-like protein KIF1C	KIF1C KIAA0706	QRPPGPRYPPYTTPP	1.013	1.00705	0.0186342	0.0101344	1.0253	0.901309	0.0360512	-0.149906	46000000	249000000	46600000	247000000	92600000	496000000	7.96661	8.69548	105005	27060
O43933	1	Peroxisome biogenesis factor 1 OS=Homo sapiens GN=PEX1 PE=1 SV=1 - [PEX1_HUMAN]	O43933	S1211	Peroxisome biogenesis factor 1 (Peroxin-1) (Peroxisome biogenesis disorder protein 1)	PEX1	KGRYRSQSGEDESMN	1.487	1.10619	0.572405	0.145605	1.50506	0.990044	0.589822	-0.0144351	27700000	9670000	41200000	8740000	68900000	18410000	7.83822	7.26505	3711	16459
O60220	1	Mitochondrial import inner membrane translocase subunit Tim8 A OS=Homo sapiens GN=TIMM8A PE=1 SV=1 - [TIM8A_HUMAN]	O60220	S96	Mitochondrial import inner membrane translocase subunit Tim8 A (Deafness dystonia protein 1) (X-linked deafness dystonia protein)	TIMM8A DDP DDP1 TIM8A	PVFSESLSD******	1.053	1.13766	0.0745054	0.186065	1.06579	1.0182	0.0919225	0.0260245	5650000	3130000	5950000	2750000	11600000	5880000	7.06446	6.76938	14980	35306	TKL/MLK	MLK3
O60231	1	Putative pre-mRNA-splicing factor ATP-dependent RNA helicase DHX16 OS=Homo sapiens GN=DHX16 PE=1 SV=2 - [DHX16_HUMAN]	O60231	S103	Putative pre-mRNA-splicing factor ATP-dependent RNA helicase DHX16 (EC 3.6.4.13) (ATP-dependent RNA helicase #3) (DEAH-box protein 16)	DHX16 DBP2 DDX16 KIAA0577	SYRLLEDSEESSEET	1.043	1.3986	0.0607392	0.483985	1.05567	1.25175	0.0781562	0.323944	885000	485000	924000	347000	1809000	832000	6.25744	5.92012	9673	100150
O60231	1	Putative pre-mRNA-splicing factor ATP-dependent RNA helicase DHX16 OS=Homo sapiens GN=DHX16 PE=1 SV=2 - [DHX16_HUMAN]	O60231	S106	Putative pre-mRNA-splicing factor ATP-dependent RNA helicase DHX16 (EC 3.6.4.13) (ATP-dependent RNA helicase #3) (DEAH-box protein 16)	DHX16 DBP2 DDX16 KIAA0577	LLEDSEESSEETVSR	1.015	1.09409	0.0214797	0.129734	1.02733	0.979212	0.0388968	-0.0303065	118000000	324000000	119000000	296000000	237000000	620000000	8.37475	8.79239	20679	96772
O60231	1	Putative pre-mRNA-splicing factor ATP-dependent RNA helicase DHX16 OS=Homo sapiens GN=DHX16 PE=1 SV=2 - [DHX16_HUMAN]	O60231	S160	Putative pre-mRNA-splicing factor ATP-dependent RNA helicase DHX16 (EC 3.6.4.13) (ATP-dependent RNA helicase #3) (DEAH-box protein 16)	DHX16 DBP2 DDX16 KIAA0577	QQTEKPESEDEWERT	0.867	1.221	-0.205896	0.288065	0.87753	1.0928	-0.188479	0.128024	258000000	172000000	223000000	141000000	481000000	313000000	8.68215	8.49554	45051	72690
O60238	1	BCL2/adenovirus E1B 19 kDa protein-interacting protein 3-like OS=Homo sapiens GN=BNIP3L PE=1 SV=1 - [BNI3L_HUMAN]	O60238	S118	BCL2/adenovirus E1B 19 kDa protein-interacting protein 3-like (Adenovirus E1B19K-binding protein B5) (BCL2/adenovirus E1B 19 kDa protein-interacting protein 3A) (NIP3-like protein X) (NIP3L)	BNIP3L BNIP3A BNIP3H NIX	HTSRDHSSQSEEEVV	1.616	0.717875	0.692427	-0.478195	1.63563	0.642498	0.709844	-0.638236	20300000	5980000	32800000	8330000	53100000	14310000	7.72509	7.15564	74593	46931
O60238	1	BCL2/adenovirus E1B 19 kDa protein-interacting protein 3-like OS=Homo sapiens GN=BNIP3L PE=1 SV=1 - [BNI3L_HUMAN]	O60238	S120	BCL2/adenovirus E1B 19 kDa protein-interacting protein 3-like (Adenovirus E1B19K-binding protein B5) (BCL2/adenovirus E1B 19 kDa protein-interacting protein 3A) (NIP3-like protein X) (NIP3L)	BNIP3L BNIP3A BNIP3H NIX	SRDHSSQSEEEVVEG	1.729	0.812348	0.789938	-0.299831	1.75	0.727051	0.807355	-0.459871	23000000	8800000	39800000	10800000	62800000	19600000	7.79796	7.29226	74805	123740
O60238	1	BCL2/adenovirus E1B 19 kDa protein-interacting protein 3-like OS=Homo sapiens GN=BNIP3L PE=1 SV=1 - [BNI3L_HUMAN]	O60238	S65	BCL2/adenovirus E1B 19 kDa protein-interacting protein 3-like (Adenovirus E1B19K-binding protein B5) (BCL2/adenovirus E1B 19 kDa protein-interacting protein 3A) (NIP3-like protein X) (NIP3L)	BNIP3L BNIP3A BNIP3H NIX	EHVPSSSSIHNGDME	1.022	1.05932	0.0313952	0.0831412	1.03441	0.948093	0.0488122	-0.0768992	31100000	46600000	31800000	43900000	62900000	90500000	7.79865	7.95665	45282	162138
O60244	1	Mediator of RNA polymerase II transcription subunit 14 OS=Homo sapiens GN=MED14 PE=1 SV=2 - [MED14_HUMAN]	O60244	S1112	Mediator of RNA polymerase II transcription subunit 14 (Activator-recruited cofactor 150 kDa component) (ARC150) (Cofactor required for Sp1 transcriptional activation subunit 2) (CRSP complex subunit 2) (Mediator complex subunit 14) (RGR1 homolog) (hRGR1) (Thyroid hormone receptor-associated protein complex 170 kDa component) (Trap170) (Transcriptional coactivator CRSP150) (Vitamin D3 receptor-in…	MED14 ARC150 CRSP2 CXorf4 DRIP150 EXLM1 RGR1 TRAP170	RAGNWPGSPQVSGPS	0.739	1.14416	-0.436354	0.194295	0.747976	1.02403	-0.418937	0.0342544	2630000	5700000	1940000	4980000	4570000	10680000	6.65992	7.02857	21014	98198	CMGC/CDK	CDK11, CDK7, CDK8
O60244	1	Mediator of RNA polymerase II transcription subunit 14 OS=Homo sapiens GN=MED14 PE=1 SV=2 - [MED14_HUMAN]	O60244	S1119	Mediator of RNA polymerase II transcription subunit 14 (Activator-recruited cofactor 150 kDa component) (ARC150) (Cofactor required for Sp1 transcriptional activation subunit 2) (CRSP complex subunit 2) (Mediator complex subunit 14) (RGR1 homolog) (hRGR1) (Thyroid hormone receptor-associated protein complex 170 kDa component) (Trap170) (Transcriptional coactivator CRSP150) (Vitamin D3 receptor-in…	MED14 ARC150 CRSP2 CXorf4 DRIP150 EXLM1 RGR1 TRAP170	SPQVSGPSPAARMPG	0.739	1.14416	-0.436354	0.194295	0.747976	1.02403	-0.418937	0.0342544	2630000	5700000	1940000	4980000	4570000	10680000	6.65992	7.02857	21014	98198	CMGC/CDK	CDK11, CDK7, CDK8
O60245	1	Protocadherin-7 OS=Homo sapiens GN=PCDH7 PE=1 SV=1 - [PCDH7_HUMAN]	O60245	S1011	Protocadherin-7 (Brain-heart protocadherin) (BH-Pcdh)	PCDH7 BHPCDH	TVQLHPQSPTAGKKH	1.039	0.993049	0.0551957	-0.0100637	1.05162	0.888779	0.0726127	-0.170104	49200000	50300000	51100000	50700000	100300000	101000000	8.0013	8.00432	33781	66458	Other/IKK	IKKa, IKKb
O60245	1	Protocadherin-7 OS=Homo sapiens GN=PCDH7 PE=1 SV=1 - [PCDH7_HUMAN]	O60245	S989	Protocadherin-7 (Brain-heart protocadherin) (BH-Pcdh)	PCDH7 BHPCDH	SVNGGPGSPDLARHY	0.879	1.02564	-0.186065	0.0365259	0.889676	0.917949	-0.168648	-0.123515	275000000	147000000	242000000	144000000	517000000	291000000	8.71349	8.46389	3657	114088
O60271	1	C-jun-amino-terminal kinase-interacting protein 4 OS=Homo sapiens GN=SPAG9 PE=1 SV=4 - [JIP4_HUMAN]	O60271	S183	C-Jun-amino-terminal kinase-interacting protein 4 (JIP-4) (JNK-interacting protein 4) (Cancer/testis antigen 89) (CT89) (Human lung cancer oncogene 6 protein) (HLC-6) (JNK-associated leucine-zipper protein) (JLP) (Mitogen-activated protein kinase 8-interacting protein 4) (Proliferation-inducing protein 6) (Protein highly expressed in testis) (PHET) (Sperm surface protein) (Sperm-associated antige…	SPAG9 HSS KIAA0516 MAPK8IP4 SYD1 HLC6	RTKLHQLSGSDQLES	0.912	1.30719	-0.132894	0.386468	0.923077	1.16993	-0.115477	0.226428	8220000	3490000	7490000	2670000	15710000	6160000	7.19618	6.78958	48068	166068	Other/CK2	CK2a2
O60271	1	C-jun-amino-terminal kinase-interacting protein 4 OS=Homo sapiens GN=SPAG9 PE=1 SV=4 - [JIP4_HUMAN]	O60271	S203	C-Jun-amino-terminal kinase-interacting protein 4 (JIP-4) (JNK-interacting protein 4) (Cancer/testis antigen 89) (CT89) (Human lung cancer oncogene 6 protein) (HLC-6) (JNK-associated leucine-zipper protein) (JLP) (Mitogen-activated protein kinase 8-interacting protein 4) (Proliferation-inducing protein 6) (Protein highly expressed in testis) (PHET) (Sperm surface protein) (Sperm-associated antige…	SPAG9 HSS KIAA0516 MAPK8IP4 SYD1 HLC6	IRKERPISLGIFPLP	0.999	1.0627	-0.00144342	0.0877334	1.01113	0.951116	0.0159736	-0.072307	468000	121000000	468000	113000000	936000	234000000	5.97128	8.36922	108168	49701
O60271	1	C-jun-amino-terminal kinase-interacting protein 4 OS=Homo sapiens GN=SPAG9 PE=1 SV=4 - [JIP4_HUMAN]	O60271	S332	C-Jun-amino-terminal kinase-interacting protein 4 (JIP-4) (JNK-interacting protein 4) (Cancer/testis antigen 89) (CT89) (Human lung cancer oncogene 6 protein) (HLC-6) (JNK-associated leucine-zipper protein) (JLP) (Mitogen-activated protein kinase 8-interacting protein 4) (Proliferation-inducing protein 6) (Protein highly expressed in testis) (PHET) (Sperm surface protein) (Sperm-associated antige…	SPAG9 HSS KIAA0516 MAPK8IP4 SYD1 HLC6	TRNVSTGSAENEEKS	1.135	1.20048	0.182692	0.263612	1.14879	1.07443	0.200109	0.103571	10900000	14000000	12400000	11700000	23300000	25700000	7.36736	7.40993	7143	112177	Other/CK2	CK2a2
O60271	1	C-jun-amino-terminal kinase-interacting protein 4 OS=Homo sapiens GN=SPAG9 PE=1 SV=4 - [JIP4_HUMAN]	O60271	S730	C-Jun-amino-terminal kinase-interacting protein 4 (JIP-4) (JNK-interacting protein 4) (Cancer/testis antigen 89) (CT89) (Human lung cancer oncogene 6 protein) (HLC-6) (JNK-associated leucine-zipper protein) (JLP) (Mitogen-activated protein kinase 8-interacting protein 4) (Proliferation-inducing protein 6) (Protein highly expressed in testis) (PHET) (Sperm surface protein) (Sperm-associated antige…	SPAG9 HSS KIAA0516 MAPK8IP4 SYD1 HLC6	GSKQRSASQSSLDKL	1.078	1.01112	0.108357	0.0159576	1.09109	0.904954	0.125774	-0.144083	35200000	32500000	37900000	32200000	73100000	64700000	7.86392	7.8109	76525	49017	Other/CK2	CK2a2
O60271	1	C-jun-amino-terminal kinase-interacting protein 4 OS=Homo sapiens GN=SPAG9 PE=1 SV=4 - [JIP4_HUMAN]	O60271	S732	C-Jun-amino-terminal kinase-interacting protein 4 (JIP-4) (JNK-interacting protein 4) (Cancer/testis antigen 89) (CT89) (Human lung cancer oncogene 6 protein) (HLC-6) (JNK-associated leucine-zipper protein) (JLP) (Mitogen-activated protein kinase 8-interacting protein 4) (Proliferation-inducing protein 6) (Protein highly expressed in testis) (PHET) (Sperm surface protein) (Sperm-associated antige…	SPAG9 HSS KIAA0516 MAPK8IP4 SYD1 HLC6	KQRSASQSSLDKLDQ	1.048	1.20048	0.0676387	0.263612	1.06073	1.07443	0.0850558	0.103571	396000000	177000000	415000000	147000000	811000000	324000000	8.90902	8.51055	5660	110760	Other/CK2	CK2a2
O60271	1	C-jun-amino-terminal kinase-interacting protein 4 OS=Homo sapiens GN=SPAG9 PE=1 SV=4 - [JIP4_HUMAN]	O60271	S733	C-Jun-amino-terminal kinase-interacting protein 4 (JIP-4) (JNK-interacting protein 4) (Cancer/testis antigen 89) (CT89) (Human lung cancer oncogene 6 protein) (HLC-6) (JNK-associated leucine-zipper protein) (JLP) (Mitogen-activated protein kinase 8-interacting protein 4) (Proliferation-inducing protein 6) (Protein highly expressed in testis) (PHET) (Sperm surface protein) (Sperm-associated antige…	SPAG9 HSS KIAA0516 MAPK8IP4 SYD1 HLC6	QRSASQSSLDKLDQE	0.926	0.924214	-0.110916	-0.1137	0.937247	0.827172	-0.0934988	-0.273741	225000000	126000000	208000000	136000000	433000000	262000000	8.63649	8.4183	34107	48879	Other/CK2	CK2a2
O60271	1	C-jun-amino-terminal kinase-interacting protein 4 OS=Homo sapiens GN=SPAG9 PE=1 SV=4 - [JIP4_HUMAN]	O60271	T217	C-Jun-amino-terminal kinase-interacting protein 4 (JIP-4) (JNK-interacting protein 4) (Cancer/testis antigen 89) (CT89) (Human lung cancer oncogene 6 protein) (HLC-6) (JNK-associated leucine-zipper protein) (JLP) (Mitogen-activated protein kinase 8-interacting protein 4) (Proliferation-inducing protein 6) (Protein highly expressed in testis) (PHET) (Sperm surface protein) (Sperm-associated antige…	SPAG9 HSS KIAA0516 MAPK8IP4 SYD1 HLC6	PAGDGLLTPDAQKGG	1.069	1.0989	0.0962619	0.136062	1.08198	0.983516	0.113679	-0.0239789	1690000	42000000	1800000	38200000	3490000	80200000	6.54283	7.90417	80888	56367	CMGC/MAPK	p38a
O60271	1	C-jun-amino-terminal kinase-interacting protein 4 OS=Homo sapiens GN=SPAG9 PE=1 SV=4 - [JIP4_HUMAN]	O60271	T365	C-Jun-amino-terminal kinase-interacting protein 4 (JIP-4) (JNK-interacting protein 4) (Cancer/testis antigen 89) (CT89) (Human lung cancer oncogene 6 protein) (HLC-6) (JNK-associated leucine-zipper protein) (JLP) (Mitogen-activated protein kinase 8-interacting protein 4) (Proliferation-inducing protein 6) (Protein highly expressed in testis) (PHET) (Sperm surface protein) (Sperm-associated antige…	SPAG9 HSS KIAA0516 MAPK8IP4 SYD1 HLC6	SGYKGSSTPTKGIEN	0.833	0.816327	-0.263612	-0.292782	0.843117	0.730612	-0.246195	-0.452822	78600000	45900000	65400000	56300000	144000000	102200000	8.15836	8.00945	74571	46898
O60271	1	C-jun-amino-terminal kinase-interacting protein 4 OS=Homo sapiens GN=SPAG9 PE=1 SV=4 - [JIP4_HUMAN]	O60271	T595	C-Jun-amino-terminal kinase-interacting protein 4 (JIP-4) (JNK-interacting protein 4) (Cancer/testis antigen 89) (CT89) (Human lung cancer oncogene 6 protein) (HLC-6) (JNK-associated leucine-zipper protein) (JLP) (Mitogen-activated protein kinase 8-interacting protein 4) (Proliferation-inducing protein 6) (Protein highly expressed in testis) (PHET) (Sperm surface protein) (Sperm-associated antige…	SPAG9 HSS KIAA0516 MAPK8IP4 SYD1 HLC6	SVKKRSSTLSQLPGD	1.081	1.15875	0.112367	0.212568	1.09413	1.03708	0.129784	0.0525271	61600000	28800000	66600000	24800000	128200000	53600000	8.10789	7.72916	4356	27082
O60292	1	Signal-induced proliferation-associated 1-like protein 3 OS=Homo sapiens GN=SIPA1L3 PE=1 SV=3 - [SI1L3_HUMAN]	O60292	S100	Signal-induced proliferation-associated 1-like protein 3 (SIPA1-like protein 3) (SPA-1-like protein 3)	SIPA1L3 KIAA0545 SPAL3	LREHSNPSPSQDTDG	1.037	0.917431	0.0524159	-0.124328	1.0496	0.821101	0.0698329	-0.284369	37100000	10700000	38500000	11600000	75600000	22300000	7.87852	7.3483	47181	164559
O60292	1	Signal-induced proliferation-associated 1-like protein 3 OS=Homo sapiens GN=SIPA1L3 PE=1 SV=3 - [SI1L3_HUMAN]	O60292	S1364	Signal-induced proliferation-associated 1-like protein 3 (SIPA1-like protein 3) (SPA-1-like protein 3)	SIPA1L3 KIAA0545 SPAL3	ADRRREVSPAPAVAG	0.916	0.921659	-0.12658	-0.117695	0.927126	0.824885	-0.109163	-0.277735	140000000	68600000	128000000	74400000	268000000	143000000	8.42813	8.15534	3214	22274
O60292	1	Signal-induced proliferation-associated 1-like protein 3 OS=Homo sapiens GN=SIPA1L3 PE=1 SV=3 - [SI1L3_HUMAN]	O60292	S1544	Signal-induced proliferation-associated 1-like protein 3 (SIPA1-like protein 3) (SPA-1-like protein 3)	SIPA1L3 KIAA0545 SPAL3	KGLQRTLSDESLCSG	0.826	0.99108	-0.275786	-0.0129262	0.836032	0.887017	-0.258369	-0.172967	73600000	26200000	60800000	26500000	134400000	52700000	8.1284	7.72181	4118	26805
O60292	1	Signal-induced proliferation-associated 1-like protein 3 OS=Homo sapiens GN=SIPA1L3 PE=1 SV=3 - [SI1L3_HUMAN]	O60292	S158	Signal-induced proliferation-associated 1-like protein 3 (SIPA1-like protein 3) (SPA-1-like protein 3)	SIPA1L3 KIAA0545 SPAL3	FQDGWPRSPGRAFLP	0.799	0.895255	-0.323733	-0.159629	0.808704	0.801253	-0.306316	-0.31967	25900000	15500000	20700000	17300000	46600000	32800000	7.66839	7.51587	76565	125905
O60292	1	Signal-induced proliferation-associated 1-like protein 3 OS=Homo sapiens GN=SIPA1L3 PE=1 SV=3 - [SI1L3_HUMAN]	O60292	S172	Signal-induced proliferation-associated 1-like protein 3 (SIPA1-like protein 3) (SPA-1-like protein 3)	SIPA1L3 KIAA0545 SPAL3	PLRHRSSSEITLSEC	0.931	1.08932	-0.103147	0.123434	0.942308	0.974946	-0.0857299	-0.0366065	10400000	17800000	9680000	16300000	20080000	34100000	7.30276	7.53275	25756	14581
O60292	1	Signal-induced proliferation-associated 1-like protein 3 OS=Homo sapiens GN=SIPA1L3 PE=1 SV=3 - [SI1L3_HUMAN]	O60292	S401	Signal-induced proliferation-associated 1-like protein 3 (SIPA1-like protein 3) (SPA-1-like protein 3)	SIPA1L3 KIAA0545 SPAL3	GLDPAFTSTEDLNCK	1.166	1.43266	0.221568	0.518701	1.18016	1.28223	0.238985	0.358661	25100000	11400000	29300000	7940000	54400000	19340000	7.7356	7.28646	38028	61522
O60293	1	Coiled-coil domain-containing protein 131 OS=Homo sapiens GN=CCDC131 PE=1 SV=3 - [CC131_HUMAN]	O60293	S352	Zinc finger C3H1 domain-containing protein (Coiled-coil domain-containing protein 131) (Proline/serine-rich coiled-coil protein 2)	ZFC3H1 CCDC131 KIAA0546 PSRC2	QNLTRRISTSDILSE	2	0.772798	1	-0.371838	2.02429	0.691654	1.01742	-0.531878	9230000	11700000	18500000	15200000	27730000	26900000	7.44295	7.42975	79370	55244
O60293	1	Coiled-coil domain-containing protein 131 OS=Homo sapiens GN=CCDC131 PE=1 SV=3 - [CC131_HUMAN]	O60293	S805	Zinc finger C3H1 domain-containing protein (Coiled-coil domain-containing protein 131) (Proline/serine-rich coiled-coil protein 2)	ZFC3H1 CCDC131 KIAA0546 PSRC2	QLKTSSSSPANSDVE	1.003	1.22699	0.00432161	0.295128	1.01518	1.09816	0.0217387	0.135088	2460000	1030000	2460000	842000	4920000	1872000	6.69197	6.27231	11254	117139
O60293	1	Coiled-coil domain-containing protein 131 OS=Homo sapiens GN=CCDC131 PE=1 SV=3 - [CC131_HUMAN]	O60293	S949	Zinc finger C3H1 domain-containing protein (Coiled-coil domain-containing protein 131) (Proline/serine-rich coiled-coil protein 2)	ZFC3H1 CCDC131 KIAA0546 PSRC2	KMMRLDSSPVSSPRK	0.883	1.29032	-0.179515	0.367732	0.893725	1.15484	-0.162098	0.207691	46900000	18400000	41400000	14300000	88300000	32700000	7.94596	7.51455	3224	22277
O60303	1	Uncharacterized protein KIAA0556 OS=Homo sapiens GN=KIAA0556 PE=2 SV=3 - [K0556_HUMAN]	O60303	S660	Uncharacterized protein KIAA0556	KIAA0556	KELGLGCSPPAETLA	0.593	1.27065	-0.753896	0.345564	0.600202	1.13723	-0.736479	0.185524	5920000	7980000	3510000	6280000	9430000	14260000	6.97451	7.15412	5911	29115
O60315	1	Zinc finger E-box-binding homeobox 2 OS=Homo sapiens GN=ZEB2 PE=1 SV=1 - [ZEB2_HUMAN]	O60315	S353	Zinc finger E-box-binding homeobox 2 (Smad-interacting protein 1) (SMADIP1) (Zinc finger homeobox protein 1b)	ZEB2 KIAA0569 SIP1 ZFHX1B ZFX1B HRIHFB2411	NNIKTGSSPNSVSSS	1.049	1.0582	0.0690147	0.0816138	1.06174	0.94709	0.0864317	-0.0784266	15500000	11500000	16300000	10900000	31800000	22400000	7.50243	7.35025	71218	24101
O60315	1	Zinc finger E-box-binding homeobox 2 OS=Homo sapiens GN=ZEB2 PE=1 SV=1 - [ZEB2_HUMAN]	O60315	S705	Zinc finger E-box-binding homeobox 2 (Smad-interacting protein 1) (SMADIP1) (Zinc finger homeobox protein 1b)	ZEB2 KIAA0569 SIP1 ZFHX1B ZFX1B HRIHFB2411	YQYSNSRSPSLERSS	0.957	1.03842	-0.0634092	0.0543923	0.968623	0.929387	-0.0459921	-0.105648	31400000	21200000	30000000	20400000	61400000	41600000	7.78817	7.61909	36155	60383
O60315	1	Zinc finger E-box-binding homeobox 2 OS=Homo sapiens GN=ZEB2 PE=1 SV=1 - [ZEB2_HUMAN]	O60315	T782	Zinc finger E-box-binding homeobox 2 (Smad-interacting protein 1) (SMADIP1) (Zinc finger homeobox protein 1b)	ZEB2 KIAA0569 SIP1 ZFHX1B ZFX1B HRIHFB2411	LDHSRSNTPSPLNLS	4.156	0.806452	2.0552	-0.31034	4.20648	0.721774	2.07261	-0.470381	446000	8210000	1850000	10200000	2296000	18410000	6.36097	7.26505	11152	116994	CMGC/GSK	GSK3A
O60318	1	80 kDa MCM3-associated protein OS=Homo sapiens GN=MCM3AP PE=1 SV=2 - [MCM3A_HUMAN]	O60318	S527	80 kDa MCM3-associated protein (Protein GANP)	MCM3AP GANP KIAA0572 MAP80	KPGDGEVSPSTEDAP	0.925	1.0929	-0.112475	0.128156	0.936235	0.978142	-0.0950577	-0.0318841	83600000	6740000	77400000	6170000	161000000	12910000	8.20683	7.11093	53776	63706
O60333	1	Kinesin-like protein KIF1B OS=Homo sapiens GN=KIF1B PE=1 SV=5 - [KIF1B_HUMAN]	O60333	S1057	Kinesin-like protein KIF1B (Klp)	KIF1B KIAA0591 KIAA1448	AMTRSGLSLEELRIV	1.017	1.24844	0.0243197	0.320126	1.02935	1.11735	0.0417367	0.160085	102000000	84100000	103000000	67400000	205000000	151500000	8.31175	8.18041	5962	119223
O60333	1	Kinesin-like protein KIF1B OS=Homo sapiens GN=KIF1B PE=1 SV=5 - [KIF1B_HUMAN]	O60333	S1454	Kinesin-like protein KIF1B (Klp)	KIF1B KIAA0591 KIAA1448	CKMSDTGSPGMQRRR	0.869	0.8285	-0.202572	-0.271426	0.879555	0.741508	-0.185155	-0.431466	34500000	9340000	30000000	11300000	64500000	20640000	7.80956	7.31471	3109	21965
O60336	1	Mitogen-activated protein kinase-binding protein 1 OS=Homo sapiens GN=MAPKBP1 PE=2 SV=3 - [MABP1_HUMAN]	O60336	S18	Mitogen-activated protein kinase-binding protein 1 (JNK-binding protein 1) (JNKBP-1)	MAPKBP1 JNKBP1 KIAA0596	RIKNLLRSPSIKLRR	0.717	1.09649	-0.479955	0.132894	0.725709	0.98136	-0.462538	-0.0271461	18300000	28200000	13100000	25700000	31400000	53900000	7.49693	7.73159	40537	160054
O60341	1	Lysine-specific histone demethylase 1 OS=Homo sapiens GN=AOF2 PE=1 SV=2 - [LSD1_HUMAN]	O60341	S131	Lysine-specific histone demethylase 1A (EC 1.-.-.-) (BRAF35-HDAC complex protein BHC110) (Flavin-containing amine oxidase domain-containing protein 2)	KDM1A AOF2 KDM1 KIAA0601 LSD1	DESLANLSEDEYYSE	1.016	1.14679	0.0229004	0.1976	1.02834	1.02638	0.0403175	0.0375595	26400000	121000000	26900000	106000000	53300000	227000000	7.72673	8.35603	106383	28652
O60341	1	Lysine-specific histone demethylase 1 OS=Homo sapiens GN=AOF2 PE=1 SV=2 - [LSD1_HUMAN]	O60341	S137	Lysine-specific histone demethylase 1A (EC 1.-.-.-) (BRAF35-HDAC complex protein BHC110) (Flavin-containing amine oxidase domain-containing protein 2)	KDM1A AOF2 KDM1 KIAA0601 LSD1	LSEDEYYSEEERNAK	1.016	1.14679	0.0229004	0.1976	1.02834	1.02638	0.0403175	0.0375595	26400000	121000000	26900000	106000000	53300000	227000000	7.72673	8.35603	106383	28652
O60341	1	Lysine-specific histone demethylase 1 OS=Homo sapiens GN=AOF2 PE=1 SV=2 - [LSD1_HUMAN]	O60341	S849	Lysine-specific histone demethylase 1A (EC 1.-.-.-) (BRAF35-HDAC complex protein BHC110) (Flavin-containing amine oxidase domain-containing protein 2)	KDM1A AOF2 KDM1 KIAA0601 LSD1	PGVPAQQSPSM****	0.982	1.17096	-0.0262051	0.227692	0.993927	1.04801	-0.00878802	0.0676516	141000000	37500000	139000000	32100000	280000000	69600000	8.44716	7.84261	61273	95365	CMGC/MAPK	Erk1, Erk2
O60341	1	Lysine-specific histone demethylase 1 OS=Homo sapiens GN=AOF2 PE=1 SV=2 - [LSD1_HUMAN]	O60341	T841	Lysine-specific histone demethylase 1A (EC 1.-.-.-) (BRAF35-HDAC complex protein BHC110) (Flavin-containing amine oxidase domain-containing protein 2)	KDM1A AOF2 KDM1 KIAA0601 LSD1	YTLPRQATPGVPAQQ	0.947	1.11235	-0.0785637	0.153607	0.958502	0.995551	-0.0611466	-0.00643343	18600000	5480000	17600000	4930000	36200000	10410000	7.55871	7.01745	61237	95342
O60343	1	TBC1 domain family member 4 OS=Homo sapiens GN=TBC1D4 PE=1 SV=2 - [TBCD4_HUMAN]	O60343	S314	TBC1 domain family member 4 (Akt substrate of 160 kDa) (AS160)	TBC1D4 AS160 KIAA0603	DEQQEFRSRCSSVTG	1.593	1.4881	0.671746	0.573467	1.61235	1.33185	0.689163	0.413426	13200000	8490000	21000000	5710000	34200000	14200000	7.53403	7.15229	37700	55565
O60343	1	TBC1 domain family member 4 OS=Homo sapiens GN=TBC1D4 PE=1 SV=2 - [TBCD4_HUMAN]	O60343	S318	TBC1 domain family member 4 (Akt substrate of 160 kDa) (AS160)	TBC1D4 AS160 KIAA0603	EFRSRCSSVTGVQRR	1.365	2.15054	0.448901	1.1047	1.38158	1.92473	0.466318	0.944657	11900000	42300000	16200000	19700000	28100000	62000000	7.44871	7.79239	42110	112485	AGC/SGK	SGK1
O60343	1	TBC1 domain family member 4 OS=Homo sapiens GN=TBC1D4 PE=1 SV=2 - [TBCD4_HUMAN]	O60343	S341	TBC1 domain family member 4 (Akt substrate of 160 kDa) (AS160)	TBC1D4 AS160 KIAA0603	QPRRRHASAPSHVQP	1.143	1.36054	0.192825	0.444184	1.15688	1.21769	0.210242	0.284143	479000000	554000000	547000000	407000000	1026000000	961000000	9.01115	8.98272	47106	72275	AGC/SGK	SGK1
O60343	1	TBC1 domain family member 4 OS=Homo sapiens GN=TBC1D4 PE=1 SV=2 - [TBCD4_HUMAN]	O60343	S570	TBC1 domain family member 4 (Akt substrate of 160 kDa) (AS160)	TBC1D4 AS160 KIAA0603	AKRSLTSSLENIFSR	1.289	1.49254	0.366252	0.577767	1.30466	1.33582	0.383669	0.417727	19400000	117000000	25000000	78400000	44400000	195400000	7.64738	8.29092	41941	30433	AGC/SGK	SGK1
O60343	1	TBC1 domain family member 4 OS=Homo sapiens GN=TBC1D4 PE=1 SV=2 - [TBCD4_HUMAN]	O60343	S588	TBC1 domain family member 4 (Akt substrate of 160 kDa) (AS160)	TBC1D4 AS160 KIAA0603	RMRGRLGSVDSFERS	1.329	1.51515	0.410341	0.599462	1.34514	1.35606	0.427758	0.439422	1200000000	663000000	1600000000	437000000	2800000000	1100000000	9.44716	9.04139	5140	117456	AGC/SGK	SGK1
O60343	1	TBC1 domain family member 4 OS=Homo sapiens GN=TBC1D4 PE=1 SV=2 - [TBCD4_HUMAN]	O60343	S591	TBC1 domain family member 4 (Akt substrate of 160 kDa) (AS160)	TBC1D4 AS160 KIAA0603	GRLGSVDSFERSNSL	0.606	0.655738	-0.72261	-0.608809	0.61336	0.586885	-0.705193	-0.76885	157000000	43900000	95200000	66900000	252200000	110800000	8.40175	8.04454	5096	117304
O60343	1	TBC1 domain family member 4 OS=Homo sapiens GN=TBC1D4 PE=1 SV=2 - [TBCD4_HUMAN]	O60343	S666	TBC1 domain family member 4 (Akt substrate of 160 kDa) (AS160)	TBC1D4 AS160 KIAA0603	GRAQGVRSPLLRQSS	0.94	1.06838	-0.0892673	0.0954196	0.951417	0.956197	-0.0718503	-0.0646208	77900000	168000000	73200000	158000000	151100000	326000000	8.17926	8.51322	40260	60374	Atypical/PIKK/FRAP	FRAP
O60343	1	TBC1 domain family member 4 OS=Homo sapiens GN=TBC1D4 PE=1 SV=2 - [TBCD4_HUMAN]	O60343	S751	TBC1 domain family member 4 (Akt substrate of 160 kDa) (AS160)	TBC1D4 AS160 KIAA0603	EGRKRTSSTCSNESL	1.087	1.22549	0.120352	0.293359	1.1002	1.09681	0.137769	0.133319	33600000	48500000	36500000	39600000	70100000	88100000	7.84572	7.94498	21002	97126	AGC/SGK	SGK1
O60343	1	TBC1 domain family member 4 OS=Homo sapiens GN=TBC1D4 PE=1 SV=2 - [TBCD4_HUMAN]	O60343	S754	TBC1 domain family member 4 (Akt substrate of 160 kDa) (AS160)	TBC1D4 AS160 KIAA0603	KRTSSTCSNESLSVG	1.087	1.22549	0.120352	0.293359	1.1002	1.09681	0.137769	0.133319	33600000	48500000	36500000	39600000	70100000	88100000	7.84572	7.94498	21002	97126	AGC/SGK	SGK1
O60343	1	TBC1 domain family member 4 OS=Homo sapiens GN=TBC1D4 PE=1 SV=2 - [TBCD4_HUMAN]	O60343	T642	TBC1 domain family member 4 (Akt substrate of 160 kDa) (AS160)	TBC1D4 AS160 KIAA0603	QFRRRAHTFSHPPSS	1.447	2.17865	0.533065	1.12343	1.46457	1.94989	0.550482	0.963394	71600000	186000000	104000000	85100000	175600000	271100000	8.24452	8.43313	50001	77913	AGC/AKT	AKT1, AKT2
O60381	1	HMG box-containing protein 1 OS=Homo sapiens GN=HBP1 PE=1 SV=2 - [HBP1_HUMAN]	O60381	S380	HMG box-containing protein 1 (HMG box transcription factor 1) (High mobility group box transcription factor 1)	HBP1	MARQRRASLSCGGPG	1.585	1.68634	0.664483	0.753896	1.60425	1.50927	0.6819	0.593856	6830000	7480000	10800000	4440000	17630000	11920000	7.24625	7.07628	40158	60469
O60487	1	Myelin protein zero-like protein 2 OS=Homo sapiens GN=MPZL2 PE=2 SV=1 - [MPZL2_HUMAN]	O60487	T214	Myelin protein zero-like protein 2 (Epithelial V-like antigen 1)	MPZL2 EVA EVA1 UNQ606/PRO1192	VSVYLEDTD******	0.809	1.3089	-0.305788	0.388355	0.818826	1.17147	-0.288371	0.228315	37900000	26000000	30700000	19900000	68600000	45900000	7.83632	7.66181	27500	37393
O60502	1	Bifunctional protein NCOAT OS=Homo sapiens GN=MGEA5 PE=1 SV=2 - [NCOAT_HUMAN]	O60502	S364	Bifunctional protein NCOAT (Meningioma-expressed antigen 5) (Nuclear cytoplasmic O-GlcNAcase and acetyltransferase) [Includes: Protein O-GlcNAcase (EC 3.2.1.169) (Glycoside hydrolase O-GlcNAcase) (Hexosaminidase C) (N-acetyl-beta-D-glucosaminidase) (N-acetyl-beta-glucosaminidase) (O-GlcNAcase) (OGA); Histone acetyltransferase (HAT) (EC 2.3.1.48)]	MGEA5 HEXC KIAA0679 MEA5	IKLENEGSDEDIETD	1.266	1.31406	0.340277	0.394032	1.28138	1.17608	0.357694	0.233991	16600000	79000000	21000000	60100000	37600000	139100000	7.57519	8.14333	26397	20920
O60504	1	Vinexin OS=Homo sapiens GN=SORBS3 PE=1 SV=1 - [VINEX_HUMAN]	O60504	S530	Vinexin (SH3-containing adapter molecule 1) (SCAM-1) (Sorbin and SH3 domain-containing protein 3)	SORBS3 SCAM1	DGPQLPTSPRLTAAA	0.97	1.05597	-0.0439433	0.0785637	0.981781	0.94509	-0.0265263	-0.0814767	1980000000	953000000	1920000000	903000000	3900000000	1856000000	9.59106	9.26858	4757	27547	CMGC/MAPK	Erk1, Erk2
O60504	1	Vinexin OS=Homo sapiens GN=SORBS3 PE=1 SV=1 - [VINEX_HUMAN]	O60504	S544	Vinexin (SH3-containing adapter molecule 1) (SCAM-1) (Sorbin and SH3 domain-containing protein 3)	SORBS3 SCAM1	ARSARHPSSPSALRS	0.946	1.0101	-0.0800879	0.0144996	0.95749	0.90404	-0.0626709	-0.145541	32100000	17900000	30300000	17700000	62400000	35600000	7.79518	7.55145	84168	138868	CAMK/CAMK2	CaMK2d, CaMK2g
O60504	1	Vinexin OS=Homo sapiens GN=SORBS3 PE=1 SV=1 - [VINEX_HUMAN]	O60504	S563	Vinexin (SH3-containing adapter molecule 1) (SCAM-1) (Sorbin and SH3 domain-containing protein 3)	SORBS3 SCAM1	TDLGGQTSPRRTGFS	1.01	1.10254	0.0143553	0.140826	1.02227	0.98677	0.0317723	-0.0192149	545000000	714000000	550000000	648000000	1095000000	1362000000	9.03941	9.13418	104519	26590	CMGC/MAPK	Erk1, Erk2
O60524	1	Serologically defined colon cancer antigen 1 OS=Homo sapiens GN=SDCCAG1 PE=1 SV=3 - [SDCG1_HUMAN]	O60524	S417	Nuclear export mediator factor NEMF (Antigen NY-CO-1) (Serologically defined colon cancer antigen 1)	NEMF SDCCAG1	LRNPYLLSEEEDDDV	1.034	1.39082	0.0482362	0.475936	1.04656	1.24478	0.0656532	0.315896	240000000	97300000	248000000	70000000	488000000	167300000	8.68842	8.2235	5994	119151
O60524	1	Serologically defined colon cancer antigen 1 OS=Homo sapiens GN=SDCCAG1 PE=1 SV=3 - [SDCG1_HUMAN]	O60524	S831	Nuclear export mediator factor NEMF (Antigen NY-CO-1) (Serologically defined colon cancer antigen 1)	NEMF SDCCAG1	MKKKKLPSDSGDLEA	1.029	1.05597	0.041243	0.0785637	1.0415	0.94509	0.05866	-0.0814767	5510000	381000	5670000	361000	11180000	742000	7.04844	5.8704	76541	132226
O60551	1	Glycylpeptide N-tetradecanoyltransferase 2 OS=Homo sapiens GN=NMT2 PE=2 SV=1 - [NMT2_HUMAN]	O60551	S38	Glycylpeptide N-tetradecanoyltransferase 2 (EC 2.3.1.97) (Myristoyl-CoA:protein N-myristoyltransferase 2) (NMT 2) (Peptide N-myristoyltransferase 2) (Type II N-myristoyltransferase)	NMT2	ETEHAKGSPGGYLGA	0.957	1.16414	-0.0634092	0.21927	0.968623	1.04191	-0.0459921	0.0592296	7520000	20700000	7190000	17800000	14710000	38500000	7.16761	7.58546	104868	26950
O60583	1	Cyclin-T2 OS=Homo sapiens GN=CCNT2 PE=1 SV=2 - [CCNT2_HUMAN]	O60583	S480	Cyclin-T2 (CycT2)	CCNT2	ASSSSVTSPIKMKIP	1.163	1.10132	0.217851	0.139236	1.17713	0.985683	0.235268	-0.0208046	126000000	122000000	147000000	111000000	273000000	233000000	8.43616	8.36736	3739	22561	CMGC/CDK/CDC2	CDC2, CDK2, CDK3
O60583	1	Cyclin-T2 OS=Homo sapiens GN=CCNT2 PE=1 SV=2 - [CCNT2_HUMAN]	O60583	T426	Cyclin-T2 (CycT2)	CCNT2	HHGPISTTPGIIPQK	1.141	1.86567	0.190299	0.899695	1.15486	1.66978	0.207716	0.739655	6330000	15600000	7220000	8340000	13550000	23940000	7.13194	7.37912	55548	86611
O60673	1	DNA polymerase zeta catalytic subunit OS=Homo sapiens GN=REV3L PE=1 SV=2 - [DPOLZ_HUMAN]	O60673	S1114	DNA polymerase zeta catalytic subunit (EC 2.7.7.7) (Protein reversionless 3-like) (REV3-like) (hREV3)	REV3L POLZ REV3	MSKLGFLSERSTSPI	0.921	1.11111	-0.118727	0.152003	0.932186	0.994444	-0.10131	-0.00803732	6840000	2240000	6300000	2010000	13140000	4250000	7.1186	6.62839	6092	119631
O60673	1	DNA polymerase zeta catalytic subunit OS=Homo sapiens GN=REV3L PE=1 SV=2 - [DPOLZ_HUMAN]	O60673	S1724	DNA polymerase zeta catalytic subunit (EC 2.7.7.7) (Protein reversionless 3-like) (REV3-like) (hREV3)	REV3L POLZ REV3	WIRSGTLSPEIFEKS	0.634	1.29366	-0.657445	0.37146	0.6417	1.15783	-0.640028	0.211419	39800000	21300000	25300000	16500000	65100000	37800000	7.81358	7.57749	6024	111132
O60716	1	Catenin delta-1 OS=Homo sapiens GN=CTNND1 PE=1 SV=1 - [CTND1_HUMAN]	O60716	S230	Catenin delta-1 (Cadherin-associated Src substrate) (CAS) (p120 catenin) (p120(ctn)) (p120(cas))	CTNND1 KIAA0384	GGSDNYGSLSRVTRI	0.668	0.791139	-0.58208	-0.337996	0.676113	0.70807	-0.564663	-0.498037	2020000000	770000000	1350000000	974000000	3370000000	1744000000	9.52763	9.24155	40675	60802	AGC/DMPK/ROCK	ROCK1, ROCK2
O60716	1	Catenin delta-1 OS=Homo sapiens GN=CTNND1 PE=1 SV=1 - [CTND1_HUMAN]	O60716	S252	Catenin delta-1 (Cadherin-associated Src substrate) (CAS) (p120 catenin) (p120(ctn)) (p120(cas))	CTNND1 KIAA0384	MEGYRAPSRQDVYGP	0.711	0.793021	-0.492079	-0.334568	0.719636	0.709754	-0.474661	-0.494609	1200000000	482000000	854000000	608000000	2054000000	1090000000	9.3126	9.03743	36137	51221
O60716	1	Catenin delta-1 OS=Homo sapiens GN=CTNND1 PE=1 SV=1 - [CTND1_HUMAN]	O60716	S268	Catenin delta-1 (Cadherin-associated Src substrate) (CAS) (p120 catenin) (p120(ctn)) (p120(cas))	CTNND1 KIAA0384	PQVRVGGSSVDLHRF	0.74	0.793651	-0.434403	-0.333424	0.748988	0.710317	-0.416986	-0.493464	2030000000	1130000000	1500000000	1420000000	3530000000	2550000000	9.54777	9.40654	39692	59753
O60716	1	Catenin delta-1 OS=Homo sapiens GN=CTNND1 PE=1 SV=1 - [CTND1_HUMAN]	O60716	S269	Catenin delta-1 (Cadherin-associated Src substrate) (CAS) (p120 catenin) (p120(ctn)) (p120(cas))	CTNND1 KIAA0384	QVRVGGSSVDLHRFH	1.174	1.35318	0.231432	0.436354	1.18826	1.2111	0.248849	0.276313	56700000	115000000	66600000	85000000	123300000	200000000	8.09096	8.30103	39613	133776	TKL/STKR	TGFbR2
O60716	1	Catenin delta-1 OS=Homo sapiens GN=CTNND1 PE=1 SV=1 - [CTND1_HUMAN]	O60716	S288	Catenin delta-1 (Cadherin-associated Src substrate) (CAS) (p120 catenin) (p120(ctn)) (p120(cas))	CTNND1 KIAA0384	GLEDDQRSMGYDDLD	1.142	1.24069	0.191563	0.311148	1.15587	1.11042	0.20898	0.151108	95400000	11800000	109000000	9520000	204400000	21320000	8.31048	7.32879	96101	10805
O60716	1	Catenin delta-1 OS=Homo sapiens GN=CTNND1 PE=1 SV=1 - [CTND1_HUMAN]	O60716	S349	Catenin delta-1 (Cadherin-associated Src substrate) (CAS) (p120 catenin) (p120(ctn)) (p120(cas))	CTNND1 KIAA0384	HERGSLASLDSLRKG	1.175	1.34409	0.232661	0.426625	1.18927	1.20296	0.250078	0.266585	80300000	231000000	94300000	172000000	174600000	403000000	8.24204	8.60531	37459	135742	TKL/STKR	TGFbR2
O60716	1	Catenin delta-1 OS=Homo sapiens GN=CTNND1 PE=1 SV=1 - [CTND1_HUMAN]	O60716	S352	Catenin delta-1 (Cadherin-associated Src substrate) (CAS) (p120 catenin) (p120(ctn)) (p120(cas))	CTNND1 KIAA0384	GSLASLDSLRKGGPP	0.351	0.30012	-1.51046	-1.73639	0.355263	0.268607	-1.49304	-1.89643	19500000	11900000	6860000	39800000	26360000	51700000	7.42095	7.71349	37613	51955
O60716	1	Catenin delta-1 OS=Homo sapiens GN=CTNND1 PE=1 SV=1 - [CTND1_HUMAN]	O60716	S47	Catenin delta-1 (Cadherin-associated Src substrate) (CAS) (p120 catenin) (p120(ctn)) (p120(cas))	CTNND1 KIAA0384	QLERVRVSPQDANPL	1.176	1.18343	0.233888	0.242977	1.19028	1.05917	0.251305	0.0829363	106000000	39400000	124000000	33300000	230000000	72700000	8.36173	7.86153	37709	131797	CMGC/CDK/CDC2	CDK2
O60716	1	Catenin delta-1 OS=Homo sapiens GN=CTNND1 PE=1 SV=1 - [CTND1_HUMAN]	O60716	S847	Catenin delta-1 (Cadherin-associated Src substrate) (CAS) (p120 catenin) (p120(ctn)) (p120(cas))	CTNND1 KIAA0384	EKEGWKKSDFQVNLN	0.923	1.1655	-0.115597	0.22095	0.934211	1.04312	-0.0981804	0.06091	53200000	59700000	49100000	51200000	102300000	110900000	8.00988	8.04493	49019	74298
O60716	1	Catenin delta-1 OS=Homo sapiens GN=CTNND1 PE=1 SV=1 - [CTND1_HUMAN]	O60716	S857	Catenin delta-1 (Cadherin-associated Src substrate) (CAS) (p120 catenin) (p120(ctn)) (p120(cas))	CTNND1 KIAA0384	QVNLNNASRSQSSHS	1.122	1.53846	0.166073	0.621488	1.13563	1.37692	0.18349	0.461448	5260000	3150000	5900000	2050000	11160000	5200000	7.04766	6.716	71055	117478	CMGC/GSK	GSK3A
O60716	1	Catenin delta-1 OS=Homo sapiens GN=CTNND1 PE=1 SV=1 - [CTND1_HUMAN]	O60716	S861	Catenin delta-1 (Cadherin-associated Src substrate) (CAS) (p120 catenin) (p120(ctn)) (p120(cas))	CTNND1 KIAA0384	NNASRSQSSHSYDDS	1.094	1.45138	0.129613	0.537424	1.10729	1.29898	0.14703	0.377384	171000000	16100000	188000000	11100000	359000000	27200000	8.55509	7.43457	6164	111085	TKL/STKR	TGFbR2
O60716	1	Catenin delta-1 OS=Homo sapiens GN=CTNND1 PE=1 SV=1 - [CTND1_HUMAN]	O60716	S862	Catenin delta-1 (Cadherin-associated Src substrate) (CAS) (p120 catenin) (p120(ctn)) (p120(cas))	CTNND1 KIAA0384	NASRSQSSHSYDDST	1.097	1.18906	0.133564	0.249822	1.11032	1.06421	0.150981	0.0897819	52300000	28000000	57300000	23600000	109600000	51600000	8.03981	7.71265	34242	125863	CK1	CK1d, CK1e
O60716	1	Catenin delta-1 OS=Homo sapiens GN=CTNND1 PE=1 SV=1 - [CTND1_HUMAN]	O60716	S864	Catenin delta-1 (Cadherin-associated Src substrate) (CAS) (p120 catenin) (p120(ctn)) (p120(cas))	CTNND1 KIAA0384	SRSQSSHSYDDSTLP	1.027	1.11483	0.0384362	0.15682	1.03947	0.99777	0.0558532	-0.0032203	801000000	315000000	823000000	283000000	1624000000	598000000	9.21059	8.7767	38148	55908	TKL/STKR	TGFbR2
O60716	1	Catenin delta-1 OS=Homo sapiens GN=CTNND1 PE=1 SV=1 - [CTND1_HUMAN]	O60716	S868	Catenin delta-1 (Cadherin-associated Src substrate) (CAS) (p120 catenin) (p120(ctn)) (p120(cas))	CTNND1 KIAA0384	SSHSYDDSTLPLIDR	0.798	1.04822	-0.325539	0.0679388	0.807692	0.938155	-0.308122	-0.0921016	2850000	52300000	2270000	49900000	5120000	102200000	6.70927	8.00945	109315	138334
O60716	1	Catenin delta-1 OS=Homo sapiens GN=CTNND1 PE=1 SV=1 - [CTND1_HUMAN]	O60716	S899	Catenin delta-1 (Cadherin-associated Src substrate) (CAS) (p120 catenin) (p120(ctn)) (p120(cas))	CTNND1 KIAA0384	NMGSNTKSLDNNYST	1.093	1.35135	0.128293	0.434403	1.10628	1.20946	0.14571	0.274362	101000000	40900000	111000000	30300000	212000000	71200000	8.32634	7.85248	3876	26495
O60716	1	Catenin delta-1 OS=Homo sapiens GN=CTNND1 PE=1 SV=1 - [CTND1_HUMAN]	O60716	S920	Catenin delta-1 (Cadherin-associated Src substrate) (CAS) (p120 catenin) (p120(ctn)) (p120(cas))	CTNND1 KIAA0384	HNRTLDRSGDLGDME	1.186	1.31926	0.246104	0.39973	1.2004	1.18074	0.263521	0.23969	395000000	491000000	468000000	372000000	863000000	863000000	8.93601	8.93601	37036	51736	TKL/STKR	TGFbR2
O60716	1	Catenin delta-1 OS=Homo sapiens GN=CTNND1 PE=1 SV=1 - [CTND1_HUMAN]	O60716	T199	Catenin delta-1 (Cadherin-associated Src substrate) (CAS) (p120 catenin) (p120(ctn)) (p120(cas))	CTNND1 KIAA0384	PYVGQAGTATLPRNF	0.496	0.569476	-1.01159	-0.812293	0.502024	0.509681	-0.994171	-0.972333	20700000	146000000	10300000	257000000	31000000	403000000	7.49136	8.60531	70953	117003
O60716	1	Catenin delta-1 OS=Homo sapiens GN=CTNND1 PE=1 SV=1 - [CTND1_HUMAN]	O60716	T201	Catenin delta-1 (Cadherin-associated Src substrate) (CAS) (p120 catenin) (p120(ctn)) (p120(cas))	CTNND1 KIAA0384	VGQAGTATLPRNFHY	0.486	0.597372	-1.04097	-0.7433	0.491903	0.534648	-1.02355	-0.90334	181000000	188000000	87900000	314000000	268900000	502000000	8.42959	8.7007	5033	27880
O60716	1	Catenin delta-1 OS=Homo sapiens GN=CTNND1 PE=1 SV=1 - [CTND1_HUMAN]	O60716	T59	Catenin delta-1 (Cadherin-associated Src substrate) (CAS) (p120 catenin) (p120(ctn)) (p120(cas))	CTNND1 KIAA0384	NPLMANGTLTRRHQN	0.415	0.462963	-1.26882	-1.11103	0.42004	0.414352	-1.2514	-1.27107	160000000	60200000	66400000	130000000	226400000	190200000	8.35488	8.27921	37164	52114
O60716	1	Catenin delta-1 OS=Homo sapiens GN=CTNND1 PE=1 SV=1 - [CTND1_HUMAN]	O60716	T643	Catenin delta-1 (Cadherin-associated Src substrate) (CAS) (p120 catenin) (p120(ctn)) (p120(cas))	CTNND1 KIAA0384	IEDPANDTVDFPKRT	0.857	1.14155	-0.222633	0.190997	0.867409	1.02169	-0.205216	0.0309568	22900000	34000000	19600000	29800000	42500000	63800000	7.62839	7.80482	51083	170031
O60716	1	Catenin delta-1 OS=Homo sapiens GN=CTNND1 PE=1 SV=1 - [CTND1_HUMAN]	O60716	T869	Catenin delta-1 (Cadherin-associated Src substrate) (CAS) (p120 catenin) (p120(ctn)) (p120(cas))	CTNND1 KIAA0384	SHSYDDSTLPLIDRN	0.886	1.03199	-0.174621	0.0454314	0.896761	0.923633	-0.157204	-0.114609	1700000000	866000000	1510000000	839000000	3210000000	1705000000	9.50651	9.23172	41226	61349
O60716	1	Catenin delta-1 OS=Homo sapiens GN=CTNND1 PE=1 SV=1 - [CTND1_HUMAN]	O60716	T906	Catenin delta-1 (Cadherin-associated Src substrate) (CAS) (p120 catenin) (p120(ctn)) (p120(cas))	CTNND1 KIAA0384	SLDNNYSTPNERGDH	0.703	0.830565	-0.508403	-0.267835	0.711538	0.743355	-0.490986	-0.427876	22000000	4040000	15500000	4860000	37500000	8900000	7.57403	6.94939	91578	153843	CMGC/CDK/CDC2	CDK2
O60716	1	Catenin delta-1 OS=Homo sapiens GN=CTNND1 PE=1 SV=1 - [CTND1_HUMAN]	O60716	T98	Catenin delta-1 (Cadherin-associated Src substrate) (CAS) (p120 catenin) (p120(ctn)) (p120(cas))	CTNND1 KIAA0384	HSHLLYSTIPRMQEP	0.389	0.423191	-1.36216	-1.24062	0.393725	0.378756	-1.34474	-1.40066	180000000	140000000	70000000	330000000	250000000	470000000	8.39794	8.6721	48912	74050
O60716	1	Catenin delta-1 OS=Homo sapiens GN=CTNND1 PE=1 SV=1 - [CTND1_HUMAN]	O60716	Y228	Catenin delta-1 (Cadherin-associated Src substrate) (CAS) (p120 catenin) (p120(ctn)) (p120(cas))	CTNND1 KIAA0384	YPGGSDNYGSLSRVT	0.664	0.772798	-0.590745	-0.371838	0.672065	0.691654	-0.573328	-0.531878	1180000000	479000000	784000000	621000000	1964000000	1100000000	9.29314	9.04139	40476	144895	TK/EGFR	EGFR, ErbB2
O60716	1	Catenin delta-1 OS=Homo sapiens GN=CTNND1 PE=1 SV=1 - [CTND1_HUMAN]	O60716	Y291	Catenin delta-1 (Cadherin-associated Src substrate) (CAS) (p120 catenin) (p120(ctn)) (p120(cas))	CTNND1 KIAA0384	DDQRSMGYDDLDYGM	1.063	1.27877	0.0881416	0.354759	1.07591	1.1445	0.105559	0.194719	5480000	13500000	5820000	10500000	11300000	24000000	7.05308	7.38021	65291	5255	TK/InsR	IGF1R
O60716	1	Catenin delta-1 OS=Homo sapiens GN=CTNND1 PE=1 SV=1 - [CTND1_HUMAN]	O60716	Y96	Catenin delta-1 (Cadherin-associated Src substrate) (CAS) (p120 catenin) (p120(ctn)) (p120(cas))	CTNND1 KIAA0384	QDHSHLLYSTIPRMQ	0.372	0.411692	-1.42663	-1.28036	0.376518	0.368464	-1.40921	-1.4404	70600000	70400000	26300000	171000000	96900000	241400000	7.98632	8.38274	49099	74090	TK/Fak	FAK, PYK2
O60749	1	Sorting nexin-2 OS=Homo sapiens GN=SNX2 PE=1 SV=2 - [SNX2_HUMAN]	O60749	S119	Sorting nexin-2 (Transformation-related gene 9 protein) (TRG-9)	SNX2 TRG9	RIESKSMSAPVIFDR	0.762	0.888099	-0.392137	-0.171207	0.771255	0.794849	-0.37472	-0.331247	6370000	13100000	4860000	14800000	11230000	27900000	7.05038	7.4456	106297	28485	TKL/STKR	ACTR2B, ALK4, TGFbR1, TGFbR2
O60763	1	General vesicular transport factor p115 OS=Homo sapiens GN=USO1 PE=1 SV=2 - [USO1_HUMAN]	O60763	S942	General vesicular transport factor p115 (Protein USO1 homolog) (Transcytosis-associated protein) (TAP) (Vesicle-docking protein)	USO1 VDP	EEEDELESGDQEDED	1.255	1.30378	0.327687	0.382702	1.27024	1.16688	0.345104	0.222661	89200000	93200000	112000000	71500000	201200000	164700000	8.30363	8.21669	27458	36286
O60825	1	6-phosphofructo-2-kinase/fructose-2,6-biphosphatase 2 OS=Homo sapiens GN=PFKFB2 PE=1 SV=2 - [F262_HUMAN]	O60825	S466	6-phosphofructo-2-kinase/fructose-2,6-bisphosphatase 2 (6PF-2-K/Fru-2,6-P2ase 2) (PFK/FBPase 2) (6PF-2-K/Fru-2,6-P2ase heart-type isozyme) [Includes: 6-phosphofructo-2-kinase (EC 2.7.1.105); Fructose-2,6-bisphosphatase (EC 3.1.3.46)]	PFKFB2	PVRMRRNSFTPLSSS	1.877	2.079	0.908429	1.05589	1.8998	1.86071	0.925846	0.895851	4070000	6290000	7640000	3030000	11710000	9320000	7.06856	6.96942	40828	60938	AGC/AKT	AKT1
O60832	1	H/ACA ribonucleoprotein complex subunit 4 OS=Homo sapiens GN=DKC1 PE=1 SV=3 - [DKC1_HUMAN]	O60832	S485	H/ACA ribonucleoprotein complex subunit 4 (EC 5.4.99.-) (CBF5 homolog) (Dyskerin) (Nopp140-associated protein of 57 kDa) (Nucleolar protein NAP57) (Nucleolar protein family A member 4) (snoRNP protein DKC1)	DKC1 NOLA4	KAKAGLESGAEPGDG	1	0.620732	0	-0.687956	1.01215	0.555556	0.0174171	-0.847997	85800000	3820000	85700000	6160000	171500000	9980000	8.23426	6.99913	8340	113754	Other/CK2	CK2a2
O60832	1	H/ACA ribonucleoprotein complex subunit 4 OS=Homo sapiens GN=DKC1 PE=1 SV=3 - [DKC1_HUMAN]	O60832	S494	H/ACA ribonucleoprotein complex subunit 4 (EC 5.4.99.-) (CBF5 homolog) (Dyskerin) (Nopp140-associated protein of 57 kDa) (Nucleolar protein NAP57) (Nucleolar protein family A member 4) (snoRNP protein DKC1)	DKC1 NOLA4	AEPGDGDSDTTKKKK	1.075	1.14286	0.104337	0.192645	1.08806	1.02286	0.121754	0.0326047	1210000000	499000000	1300000000	437000000	2510000000	936000000	9.39967	8.97128	3495	113584	Other/CK2	CK2a2
O60832	1	H/ACA ribonucleoprotein complex subunit 4 OS=Homo sapiens GN=DKC1 PE=1 SV=3 - [DKC1_HUMAN]	O60832	S513	H/ACA ribonucleoprotein complex subunit 4 (EC 5.4.99.-) (CBF5 homolog) (Dyskerin) (Nopp140-associated protein of 57 kDa) (Nucleolar protein NAP57) (Nucleolar protein family A member 4) (snoRNP protein DKC1)	DKC1 NOLA4	AKEVELVSE******	0.934	1.04058	-0.0985055	0.0573917	0.945344	0.931322	-0.0810885	-0.102649	283000000	166000000	264000000	159000000	547000000	325000000	8.73799	8.51188	14896	35195	Other/CK2	CK2a2
O60841	1	Eukaryotic translation initiation factor 5B OS=Homo sapiens GN=EIF5B PE=1 SV=3 - [IF2P_HUMAN]	O60841	S107	Eukaryotic translation initiation factor 5B (eIF-5B) (Translation initiation factor IF-2)	EIF5B IF2 KIAA0741	GQKGKKQSFDDNDSE	1.05	1.39082	0.0703893	0.475936	1.06275	1.24478	0.0878064	0.315896	643000000	7870000	675000000	5660000	1318000000	13530000	9.11992	7.1313	45037	161986	AGC	LATS1
O60841	1	Eukaryotic translation initiation factor 5B OS=Homo sapiens GN=EIF5B PE=1 SV=3 - [IF2P_HUMAN]	O60841	S113	Eukaryotic translation initiation factor 5B (eIF-5B) (Translation initiation factor IF-2)	EIF5B IF2 KIAA0741	QSFDDNDSEELEDKD	0.967	1.00705	-0.0484122	0.0101344	0.978745	0.901309	-0.0309952	-0.149906	2330000000	802000000	2250000000	796000000	4580000000	1598000000	9.66087	9.20358	32940	47555
O60841	1	Eukaryotic translation initiation factor 5B OS=Homo sapiens GN=EIF5B PE=1 SV=3 - [IF2P_HUMAN]	O60841	S1168	Eukaryotic translation initiation factor 5B (eIF-5B) (Translation initiation factor IF-2)	EIF5B IF2 KIAA0741	IEPIPGESPKMFGRH	1.03	1.20919	0.0426443	0.274041	1.04251	1.08222	0.0600614	0.114	67000000	121000000	69100000	100000000	136100000	221000000	8.13386	8.34439	4512	116069
O60841	1	Eukaryotic translation initiation factor 5B OS=Homo sapiens GN=EIF5B PE=1 SV=3 - [IF2P_HUMAN]	O60841	S135	Eukaryotic translation initiation factor 5B (eIF-5B) (Translation initiation factor IF-2)	EIF5B IF2 KIAA0741	KPKVEMYSGSDDDDD	1.141	1.10988	0.190299	0.150401	1.15486	0.993341	0.207716	-0.00963942	468000000	812000000	534000000	732000000	1002000000	1544000000	9.00087	9.18865	5321	28430
O60841	1	Eukaryotic translation initiation factor 5B OS=Homo sapiens GN=EIF5B PE=1 SV=3 - [IF2P_HUMAN]	O60841	S137	Eukaryotic translation initiation factor 5B (eIF-5B) (Translation initiation factor IF-2)	EIF5B IF2 KIAA0741	KVEMYSGSDDDDDFN	1.033	1.04058	0.0468403	0.0573917	1.04555	0.931322	0.0642573	-0.102649	51400000	10700000	53100000	10300000	104500000	21000000	8.01912	7.32222	76518	162609
O60841	1	Eukaryotic translation initiation factor 5B OS=Homo sapiens GN=EIF5B PE=1 SV=3 - [IF2P_HUMAN]	O60841	S164	Eukaryotic translation initiation factor 5B (eIF-5B) (Translation initiation factor IF-2)	EIF5B IF2 KIAA0741	SNKKWDGSEEDEDNS	1.094	1.10254	0.129613	0.140826	1.10729	0.98677	0.14703	-0.0192149	246000000	246000000	269000000	224000000	515000000	470000000	8.71181	8.6721	39532	72430
O60841	1	Eukaryotic translation initiation factor 5B OS=Homo sapiens GN=EIF5B PE=1 SV=3 - [IF2P_HUMAN]	O60841	S214	Eukaryotic translation initiation factor 5B (eIF-5B) (Translation initiation factor IF-2)	EIF5B IF2 KIAA0741	KPGPNIESGNEDDDA	0.951	1.10865	-0.0724828	0.148801	0.962551	0.992239	-0.0550657	-0.0112398	5730000000	3910000000	5450000000	3530000000	11180000000	7440000000	10.0484	9.87157	36603	51600
O60885	1	Bromodomain-containing protein 4 OS=Homo sapiens GN=BRD4 PE=1 SV=2 - [BRD4_HUMAN]	O60885	S1117	Bromodomain-containing protein 4 (Protein HUNK1)	BRD4 HUNK1	VKEEKIHSPIIRSEP	0.98	0.927644	-0.0291463	-0.108357	0.991903	0.830241	-0.0117293	-0.268398	73800000	91500000	72300000	98600000	146100000	190100000	8.16465	8.27898	42719	141739	Atypical/PIKK/FRAP	FRAP
O60885	1	Bromodomain-containing protein 4 OS=Homo sapiens GN=BRD4 PE=1 SV=2 - [BRD4_HUMAN]	O60885	S593	Bromodomain-containing protein 4 (Protein HUNK1)	BRD4 HUNK1	KEPAPMKSKPPPTYE	1.047	0.864304	0.0662614	-0.210389	1.05972	0.773552	0.0836785	-0.370429	299000000	141000000	313000000	164000000	612000000	305000000	8.78675	8.4843	35281	50451
O60885	1	Bromodomain-containing protein 4 OS=Homo sapiens GN=BRD4 PE=1 SV=2 - [BRD4_HUMAN]	O60885	S601	Bromodomain-containing protein 4 (Protein HUNK1)	BRD4 HUNK1	KPPPTYESEEEDKCK	1.047	0.864304	0.0662614	-0.210389	1.05972	0.773552	0.0836785	-0.370429	299000000	141000000	313000000	164000000	612000000	305000000	8.78675	8.4843	35281	50451	CMGC/CDK/CDC2	CDC2, CDK2, CDK3
O60930	1	Ribonuclease H1 OS=Homo sapiens GN=RNASEH1 PE=1 SV=2 - [RNH1_HUMAN]	O60930	S76	Ribonuclease H1 (RNase H1) (EC 3.1.26.4) (Ribonuclease H type II)	RNASEH1 RNH1	AFVRKSASPEVSEGH	1.021	1.22549	0.0299829	0.293359	1.0334	1.09681	0.0473999	0.133319	59500000	24800000	60700000	20200000	120200000	45000000	8.0799	7.65321	86571	67541
O75044	1	SLIT-ROBO Rho GTPase-activating protein 2 OS=Homo sapiens GN=SRGAP2 PE=1 SV=2 - [FNBP2_HUMAN]	O75044	S206	SLIT-ROBO Rho GTPase-activating protein 2 (srGAP2) (Formin-binding protein 2) (Rho GTPase-activating protein 34)	SRGAP2 ARHGAP34 FNBP2 KIAA0456	EDRQTPRSPDSTANV	0.866	1.02459	-0.207561	0.0350469	0.876518	0.917008	-0.190144	-0.124993	58400000	17500000	50600000	17100000	109000000	34600000	8.03743	7.53908	39178	158655
O75113	1	NEDD4-binding protein 1 OS=Homo sapiens GN=N4BP1 PE=1 SV=3 - [N4BP1_HUMAN]	O75113	T242	NEDD4-binding protein 1 (N4BP1)	N4BP1 KIAA0615	EARNKAGTPVSELTK	0.827	0.974659	-0.274041	-0.0370307	0.837045	0.87232	-0.256624	-0.197071	122000000	319000000	101000000	327000000	223000000	646000000	8.3483	8.81023	4480	115897
O75116	1	Rho-associated protein kinase 2 OS=Homo sapiens GN=ROCK2 PE=1 SV=3 - [ROCK2_HUMAN]	O75116	S1362	Rho-associated protein kinase 2 (EC 2.7.11.1) (Rho kinase 2) (Rho-associated, coiled-coil-containing protein kinase 2) (Rho-associated, coiled-coil-containing protein kinase II) (ROCK-II) (p164 ROCK-2)	ROCK2 KIAA0619	PDPFARSSPRTSMKI	0.667	0.816993	-0.584241	-0.291604	0.675101	0.731209	-0.566824	-0.451644	356000000	432000000	237000000	529000000	593000000	961000000	8.77305	8.98272	50925	169756	Atypical/PIKK/FRAP	FRAP
O75116	1	Rho-associated protein kinase 2 OS=Homo sapiens GN=ROCK2 PE=1 SV=3 - [ROCK2_HUMAN]	O75116	S1374	Rho-associated protein kinase 2 (EC 2.7.11.1) (Rho kinase 2) (Rho-associated, coiled-coil-containing protein kinase 2) (Rho-associated, coiled-coil-containing protein kinase II) (ROCK-II) (p164 ROCK-2)	ROCK2 KIAA0619	MKIQQNQSIRRPSRQ	0.781	1.23001	-0.356606	0.298673	0.790486	1.10086	-0.339188	0.138632	20200000	4850000	15700000	3950000	35900000	8800000	7.55509	6.94448	52169	83171	AGC/PKC	PKCa
O75116	1	Rho-associated protein kinase 2 OS=Homo sapiens GN=ROCK2 PE=1 SV=3 - [ROCK2_HUMAN]	O75116	S1379	Rho-associated protein kinase 2 (EC 2.7.11.1) (Rho kinase 2) (Rho-associated, coiled-coil-containing protein kinase 2) (Rho-associated, coiled-coil-containing protein kinase II) (ROCK-II) (p164 ROCK-2)	ROCK2 KIAA0619	NQSIRRPSRQLAPNK	1.587	2.1692	0.666302	1.11716	1.60628	1.94143	0.683719	0.957121	7880000	8610000	12500000	3970000	20380000	12580000	7.3092	7.09968	91436	77659
O75122	1	CLIP-associating protein 2 OS=Homo sapiens GN=CLASP2 PE=1 SV=2 - [CLAP2_HUMAN]	O75122	S1013	CLIP-associating protein 2 (Cytoplasmic linker-associated protein 2) (Protein Orbit homolog 2) (hOrbit2)	CLASP2 KIAA0627	HSMPTHSSPRSRDYN	0.868	1.19474	-0.204233	0.2567	0.878543	1.0693	-0.186816	0.0966601	38000000	60900000	32900000	51000000	70900000	111900000	7.85065	8.04883	47564	72735
O75122	1	CLIP-associating protein 2 OS=Homo sapiens GN=CLASP2 PE=1 SV=2 - [CLAP2_HUMAN]	O75122	S327	CLIP-associating protein 2 (Cytoplasmic linker-associated protein 2) (Protein Orbit homolog 2) (hOrbit2)	CLASP2 KIAA0627	SDRSSSSSQESLNRP	0.931	1.11111	-0.103147	0.152003	0.942308	0.994444	-0.0857299	-0.00803732	147000000	58300000	137000000	52400000	284000000	110700000	8.45332	8.04415	36524	51280	CK1	CK1d, CK1e
O75122	1	CLIP-associating protein 2 OS=Homo sapiens GN=CLASP2 PE=1 SV=2 - [CLAP2_HUMAN]	O75122	S360	CLIP-associating protein 2 (Cytoplasmic linker-associated protein 2) (Protein Orbit homolog 2) (hOrbit2)	CLASP2 KIAA0627	AGSSKASSLPGSLQR	0.7	0.912409	-0.514573	-0.132248	0.708502	0.816606	-0.497156	-0.292288	25300000	17900000	17700000	19600000	43000000	37500000	7.63347	7.57403	70260	109448
O75122	1	CLIP-associating protein 2 OS=Homo sapiens GN=CLASP2 PE=1 SV=2 - [CLAP2_HUMAN]	O75122	S370	CLIP-associating protein 2 (Cytoplasmic linker-associated protein 2) (Protein Orbit homolog 2) (hOrbit2)	CLASP2 KIAA0627	GSLQRSRSDIDVNAA	1.009	1.07066	0.0129262	0.0985055	1.02126	0.958244	0.0303432	-0.0615349	413000000	267000000	416000000	249000000	829000000	516000000	8.91855	8.71265	35716	50825
O75122	1	CLIP-associating protein 2 OS=Homo sapiens GN=CLASP2 PE=1 SV=2 - [CLAP2_HUMAN]	O75122	S455	CLIP-associating protein 2 (Cytoplasmic linker-associated protein 2) (Protein Orbit homolog 2) (hOrbit2)	CLASP2 KIAA0627	RTKMVSQSQPGSRSG	0.911	1.05708	-0.134477	0.0800879	0.922065	0.946089	-0.11706	-0.0799525	2070000	4330000	1880000	4100000	3950000	8430000	6.5966	6.92583	21376	97691
O75122	1	CLIP-associating protein 2 OS=Homo sapiens GN=CLASP2 PE=1 SV=2 - [CLAP2_HUMAN]	O75122	S459	CLIP-associating protein 2 (Cytoplasmic linker-associated protein 2) (Protein Orbit homolog 2) (hOrbit2)	CLASP2 KIAA0627	VSQSQPGSRSGSPGR	0.911	1.05708	-0.134477	0.0800879	0.922065	0.946089	-0.11706	-0.0799525	2070000	4330000	1880000	4100000	3950000	8430000	6.5966	6.92583	21376	97691
O75122	1	CLIP-associating protein 2 OS=Homo sapiens GN=CLASP2 PE=1 SV=2 - [CLAP2_HUMAN]	O75122	S463	CLIP-associating protein 2 (Cytoplasmic linker-associated protein 2) (Protein Orbit homolog 2) (hOrbit2)	CLASP2 KIAA0627	QPGSRSGSPGRVLTT	0.911	1.05708	-0.134477	0.0800879	0.922065	0.946089	-0.11706	-0.0799525	2070000	4330000	1880000	4100000	3950000	8430000	6.5966	6.92583	21376	97691
O75122	1	CLIP-associating protein 2 OS=Homo sapiens GN=CLASP2 PE=1 SV=2 - [CLAP2_HUMAN]	O75122	S525	CLIP-associating protein 2 (Cytoplasmic linker-associated protein 2) (Protein Orbit homolog 2) (hOrbit2)	CLASP2 KIAA0627	RIPRPSVSQGCSREA	1.027	1.27389	0.0384362	0.349235	1.03947	1.14013	0.0558532	0.189195	3290000	2250000	3380000	1770000	6670000	4020000	6.82413	6.60423	27317	37187
O75122	1	CLIP-associating protein 2 OS=Homo sapiens GN=CLASP2 PE=1 SV=2 - [CLAP2_HUMAN]	O75122	S529	CLIP-associating protein 2 (Cytoplasmic linker-associated protein 2) (Protein Orbit homolog 2) (hOrbit2)	CLASP2 KIAA0627	PSVSQGCSREASRES	1.027	1.27389	0.0384362	0.349235	1.03947	1.14013	0.0558532	0.189195	3290000	2250000	3380000	1770000	6670000	4020000	6.82413	6.60423	27317	37187
O75122	1	CLIP-associating protein 2 OS=Homo sapiens GN=CLASP2 PE=1 SV=2 - [CLAP2_HUMAN]	O75122	S585	CLIP-associating protein 2 (Cytoplasmic linker-associated protein 2) (Protein Orbit homolog 2) (hOrbit2)	CLASP2 KIAA0627	QSSRLSSSVSAMRVL	1.222	1.06045	0.289244	0.0846703	1.23684	0.949099	0.306661	-0.0753701	15400000	28300000	18900000	26700000	34300000	55000000	7.53529	7.74036	7574	112700
O75122	1	CLIP-associating protein 2 OS=Homo sapiens GN=CLASP2 PE=1 SV=2 - [CLAP2_HUMAN]	O75122	S596	CLIP-associating protein 2 (Cytoplasmic linker-associated protein 2) (Protein Orbit homolog 2) (hOrbit2)	CLASP2 KIAA0627	MRVLNTGSDVEEAVA	0.971	0.910747	-0.0424568	-0.134878	0.982794	0.815118	-0.0250397	-0.294918	9630000	50000000	9350000	54900000	18980000	104900000	7.2783	8.02078	26892	163649
O75131	1	Copine-3 OS=Homo sapiens GN=CPNE3 PE=1 SV=1 - [CPNE3_HUMAN]	O75131	S243	Copine-3 (Copine III)	CPNE3 CPN3 KIAA0636	LKEASRSSPVEFECI	0.89	1.08342	-0.168123	0.115597	0.90081	0.969664	-0.150706	-0.044443	55600000	12400000	49500000	11400000	105100000	23800000	8.0216	7.37658	37165	52118
O75146	1	Huntingtin-interacting protein 1-related protein OS=Homo sapiens GN=HIP1R PE=1 SV=2 - [HIP1R_HUMAN]	O75146	S1045	Huntingtin-interacting protein 1-related protein (HIP1-related protein) (Huntingtin-interacting protein 12) (HIP-12)	HIP1R HIP12 KIAA0655	PPLAQKPSVAPRQDH	2.419	2.6455	1.27441	1.40354	2.44838	2.36772	1.29183	1.2435	8560000	30900000	20700000	11700000	29260000	42600000	7.46627	7.62941	47584	165332
O75151	1	PHD finger protein 2 OS=Homo sapiens GN=PHF2 PE=1 SV=3 - [PHF2_HUMAN]	O75151	S882	Lysine-specific demethylase PHF2 (EC 1.14.11.-) (GRC5) (PHD finger protein 2)	PHF2 KIAA0662	YVYPSLESDEDNPIF	1.275	1.3947	0.350497	0.479955	1.29049	1.24826	0.367914	0.319915	5830000	12900000	7430000	9240000	13260000	22140000	7.12254	7.34518	68621	21242
O75152	1	Zinc finger CCCH domain-containing protein 11A OS=Homo sapiens GN=ZC3H11A PE=1 SV=3 - [ZC11A_HUMAN]	O75152	S108	Zinc finger CCCH domain-containing protein 11A	ZC3H11A KIAA0663 ZC3HDC11A	VLPTVPESPEEEVKA	1.401	1.15741	0.486457	0.210897	1.41802	1.03588	0.503874	0.0508564	14000000	40100000	19600000	34700000	33600000	74800000	7.52634	7.8739	5794	28806
O75153	1	Putative eukaryotic translation initiation factor 3 subunit OS=Homo sapiens GN=KIAA0664 PE=1 SV=2 - [EIF3X_HUMAN]	O75153	S664	Protein KIAA0664	KIAA0664	PPGQEAGSEEEGSSA	1.063	0.963391	0.0881416	-0.0538064	1.07591	0.862235	0.105559	-0.213847	90300000	11100000	96000000	11500000	186300000	22600000	8.27021	7.35411	3672	114067
O75164	1	JmjC domain-containing histone demethylation protein 3A OS=Homo sapiens GN=JMJD2A PE=1 SV=1 - [JHD3A_HUMAN]	O75164	S523	Lysine-specific demethylase 4A (EC 1.14.11.-) (JmjC domain-containing histone demethylation protein 3A) (Jumonji domain-containing protein 2A)	KDM4A JHDM3A JMJD2 JMJD2A KIAA0677	SSRDSISSDSETSEP	0.921	0.978474	-0.118727	-0.0313952	0.932186	0.875734	-0.10131	-0.191436	23700000	12400000	21800000	12600000	45500000	25000000	7.65801	7.39794	66928	100272
O75167	1	Phosphatase and actin regulator 2 OS=Homo sapiens GN=PHACTR2 PE=1 SV=2 - [PHAR2_HUMAN]	O75167	S23	Phosphatase and actin regulator 2	PHACTR2 C6orf56 KIAA0680	SDGPTAGSQTPPFKR	0.806	1.0582	-0.311148	0.0816138	0.815789	0.94709	-0.293731	-0.0784266	74000000	78100000	59600000	73800000	133600000	151900000	8.12581	8.18156	70754	23663
O75167	1	Phosphatase and actin regulator 2 OS=Homo sapiens GN=PHACTR2 PE=1 SV=2 - [PHAR2_HUMAN]	O75167	S522	Phosphatase and actin regulator 2	PHACTR2 C6orf56 KIAA0680	TKLVRRLSQRPTTEE	0.535	0.728332	-0.902389	-0.457332	0.541498	0.651857	-0.884972	-0.617372	82600000	37400000	44200000	51300000	126800000	88700000	8.10312	7.94792	50573	78544
O75167	1	Phosphatase and actin regulator 2 OS=Homo sapiens GN=PHACTR2 PE=1 SV=2 - [PHAR2_HUMAN]	O75167	T25	Phosphatase and actin regulator 2	PHACTR2 C6orf56 KIAA0680	GPTAGSQTPPFKRKG	0.805	1	-0.312939	0	0.814777	0.895	-0.295522	-0.16004	548000000	277000000	441000000	277000000	989000000	554000000	8.9952	8.74351	5002	27717
O75170	1	SAPS domain family member 2 OS=Homo sapiens GN=SAPS2 PE=1 SV=2 - [SAPS2_HUMAN]	O75170	S289	Serine/threonine-protein phosphatase 6 regulatory subunit 2 (SAPS domain family member 2)	PPP6R2 KIAA0685 PP6R2 SAPS2	GTEGLVDSFSQGLER	1.088	1.11982	0.121679	0.163268	1.10121	1.00224	0.139096	0.00322751	15600000	5860000	16900000	5230000	32500000	11090000	7.51188	7.04493	41839	146377
O75170	1	SAPS domain family member 2 OS=Homo sapiens GN=SAPS2 PE=1 SV=2 - [SAPS2_HUMAN]	O75170	S771	Serine/threonine-protein phosphatase 6 regulatory subunit 2 (SAPS domain family member 2)	PPP6R2 KIAA0685 PP6R2 SAPS2	ESGPRCSSPVDTECS	1.056	1.11111	0.0786098	0.152003	1.06883	0.994444	0.0960269	-0.00803732	19500000	2510000	20600000	2260000	40100000	4770000	7.60314	6.67852	35146	129181
O75179	1	Ankyrin repeat domain-containing protein 17 OS=Homo sapiens GN=ANKRD17 PE=1 SV=3 - [ANR17_HUMAN]	O75179	S1709	Ankyrin repeat domain-containing protein 17 (Gene trap ankyrin repeat protein) (Serologically defined breast cancer antigen NY-BR-16)	ANKRD17 GTAR KIAA0697	NGKLTVASPKRGQKR	0.88	1.04822	-0.184425	0.0679388	0.890688	0.938155	-0.167008	-0.0921016	132000000	228000000	116000000	217000000	248000000	445000000	8.39445	8.64836	3589	22447	CMGC/CDK/CDC2	CDK2
O75179	1	Ankyrin repeat domain-containing protein 17 OS=Homo sapiens GN=ANKRD17 PE=1 SV=3 - [ANR17_HUMAN]	O75179	S2065	Ankyrin repeat domain-containing protein 17 (Gene trap ankyrin repeat protein) (Serologically defined breast cancer antigen NY-BR-16)	ANKRD17 GTAR KIAA0697	NSPLDCGSASPNKVA	1.992	0.951475	0.994218	-0.0717627	2.01619	0.85157	1.01163	-0.231803	12000000	21600000	23800000	22700000	35800000	44300000	7.55388	7.6464	8578	113883
O75179	1	Ankyrin repeat domain-containing protein 17 OS=Homo sapiens GN=ANKRD17 PE=1 SV=3 - [ANR17_HUMAN]	O75179	S2067	Ankyrin repeat domain-containing protein 17 (Gene trap ankyrin repeat protein) (Serologically defined breast cancer antigen NY-BR-16)	ANKRD17 GTAR KIAA0697	PLDCGSASPNKVASS	1.036	1.10742	0.051024	0.147202	1.04858	0.991141	0.0684411	-0.0128383	79200000	69400000	82000000	62700000	161200000	132100000	8.20737	8.1209	104167	26262	CMGC/CDK/CDC2	CDK2
O75179	1	Ankyrin repeat domain-containing protein 17 OS=Homo sapiens GN=ANKRD17 PE=1 SV=3 - [ANR17_HUMAN]	O75179	S2401	Ankyrin repeat domain-containing protein 17 (Gene trap ankyrin repeat protein) (Serologically defined breast cancer antigen NY-BR-16)	ANKRD17 GTAR KIAA0697	SSGVRAPSPAPSSVP	1.085	1.01523	0.117695	0.0218044	1.09818	0.908629	0.135112	-0.138236	143000000	71900000	156000000	70800000	299000000	142700000	8.47567	8.15442	33031	127842	CMGC/CDK/CDC2	CDK2
O75182	1	Paired amphipathic helix protein Sin3b OS=Homo sapiens GN=SIN3B PE=1 SV=2 - [SIN3B_HUMAN]	O75182	S740	Paired amphipathic helix protein Sin3b (Histone deacetylase complex subunit Sin3b) (Transcriptional corepressor Sin3b)	SIN3B KIAA0700	PAPGPHSSPPEEKGA	0.88	1.27877	-0.184425	0.354759	0.890688	1.1445	-0.167008	0.194719	1830000	24400000	1610000	19100000	3440000	43500000	6.53656	7.63849	59521	90207
O75190	1	DnaJ homolog subfamily B member 6 OS=Homo sapiens GN=DNAJB6 PE=1 SV=2 - [DNJB6_HUMAN]	O75190	S277	DnaJ homolog subfamily B member 6 (HHDJ1) (Heat shock protein J2) (HSJ-2) (MRJ) (MSJ-1)	DNAJB6 HSJ2 MRJ MSJ1	RHAPHCLSEEEGEQD	0.678	2.46914	-0.560643	1.30401	0.686235	2.20988	-0.543226	1.14397	9090000	15900000	6160000	6420000	15250000	22320000	7.18327	7.34869	60614	93413	STE/STE-Unique/NIK	NIK
O75351	1	Vacuolar protein sorting-associating protein 4B OS=Homo sapiens GN=VPS4B PE=1 SV=2 - [VPS4B_HUMAN]	O75351	S102	Vacuolar protein sorting-associated protein 4B (Cell migration-inducing gene 1 protein) (Suppressor of K(+) transport growth defect 1) (Protein SKD1)	VPS4B SKD1 VPS42 MIG1	ADEKGNDSDGEGESD	0.979	0.880282	-0.0306192	-0.183963	0.990891	0.787852	-0.0132022	-0.344003	320000000	116000000	313000000	132000000	633000000	248000000	8.8014	8.39445	84529	141168	CMGC/DYRK	HIPK2
O75367	1	Core histone macro-H2A.1 OS=Homo sapiens GN=H2AFY PE=1 SV=4 - [H2AY_HUMAN]	O75367	S173	Core histone macro-H2A.1 (Histone macroH2A1) (mH2A1) (Histone H2A.y) (H2A/y) (Medulloblastoma antigen MU-MB-50.205)	H2AFY MACROH2A1	SKAASADSTTEGTPA	1.06	1.11732	0.0840643	0.16004	1.07287	1	0.101481	0	7310000	9020000	7740000	8070000	15050000	17090000	7.17754	7.23274	68274	106289	CK1	VRK1
O75369	1	Filamin-B OS=Homo sapiens GN=FLNB PE=1 SV=1 - [FLNB_HUMAN]	O75369	S1505	Filamin-B (FLN-B) (ABP-278) (ABP-280 homolog) (Actin-binding-like protein) (Beta-filamin) (Filamin homolog 1) (Fh1) (Filamin-3) (Thyroid autoantigen) (Truncated actin-binding protein) (Truncated ABP)	FLNB FLN1L FLN3 TABP TAP	ADEEIPRSPFKVKVL	0.981	1.06838	-0.027675	0.0954196	0.992915	0.956197	-0.0102579	-0.0646208	103000000	143000000	101000000	134000000	204000000	277000000	8.30963	8.44248	37645	52261
O75369	1	Filamin-B OS=Homo sapiens GN=FLNB PE=1 SV=1 - [FLNB_HUMAN]	O75369	S2107	Filamin-B (FLN-B) (ABP-278) (ABP-280 homolog) (Actin-binding-like protein) (Beta-filamin) (Filamin homolog 1) (Fh1) (Filamin-3) (Thyroid autoantigen) (Truncated actin-binding protein) (Truncated ABP)	FLNB FLN1L FLN3 TABP TAP	TRTSRAPSVATVGSI	0.988	1.22549	-0.0174171	0.293359	1	1.09681	0	0.133319	65400000	60400000	64600000	49300000	130000000	109700000	8.11394	8.04021	6554	56128
O75369	1	Filamin-B OS=Homo sapiens GN=FLNB PE=1 SV=1 - [FLNB_HUMAN]	O75369	S2135	Filamin-B (FLN-B) (ABP-278) (ABP-280 homolog) (Actin-binding-like protein) (Beta-filamin) (Filamin homolog 1) (Fh1) (Filamin-3) (Thyroid autoantigen) (Truncated actin-binding protein) (Truncated ABP)	FLNB FLN1L FLN3 TABP TAP	DMSAHVTSPSGRVTE	1.026	1.20048	0.0370307	0.263612	1.03846	1.07443	0.0544478	0.103571	53800000	11100000	55100000	9240000	108900000	20340000	8.03703	7.30835	75996	44901
O75369	1	Filamin-B OS=Homo sapiens GN=FLNB PE=1 SV=1 - [FLNB_HUMAN]	O75369	S2465	Filamin-B (FLN-B) (ABP-278) (ABP-280 homolog) (Actin-binding-like protein) (Beta-filamin) (Filamin homolog 1) (Fh1) (Filamin-3) (Thyroid autoantigen) (Truncated actin-binding protein) (Truncated ABP)	FLNB FLN1L FLN3 TABP TAP	GPNHIVGSPFKAKVT	1.015	1.15741	0.0214797	0.210897	1.02733	1.03588	0.0388968	0.0508564	6790000	12100000	6890000	10500000	13680000	22600000	7.13609	7.35411	41111	61225
O75369	1	Filamin-B OS=Homo sapiens GN=FLNB PE=1 SV=1 - [FLNB_HUMAN]	O75369	S2481	Filamin-B (FLN-B) (ABP-278) (ABP-280 homolog) (Actin-binding-like protein) (Beta-filamin) (Filamin homolog 1) (Fh1) (Filamin-3) (Thyroid autoantigen) (Truncated actin-binding protein) (Truncated ABP)	FLNB FLN1L FLN3 TABP TAP	QRLVSPGSANETSSI	0.981	1.24378	-0.027675	0.314733	0.992915	1.11318	-0.0102579	0.154692	8830000	2260000	8670000	1820000	17500000	4080000	7.24304	6.61066	107711	106991
O75369	1	Filamin-B OS=Homo sapiens GN=FLNB PE=1 SV=1 - [FLNB_HUMAN]	O75369	T2110	Filamin-B (FLN-B) (ABP-278) (ABP-280 homolog) (Actin-binding-like protein) (Beta-filamin) (Filamin homolog 1) (Fh1) (Filamin-3) (Thyroid autoantigen) (Truncated actin-binding protein) (Truncated ABP)	FLNB FLN1L FLN3 TABP TAP	SRAPSVATVGSICDL	1.149	1.45985	0.200379	0.545824	1.16296	1.30657	0.217796	0.385784	9800000	41200000	11300000	28200000	21100000	69400000	7.32428	7.84136	107380	29769
O75369	1	Filamin-B OS=Homo sapiens GN=FLNB PE=1 SV=1 - [FLNB_HUMAN]	O75369	T519	Filamin-B (FLN-B) (ABP-278) (ABP-280 homolog) (Actin-binding-like protein) (Beta-filamin) (Filamin homolog 1) (Fh1) (Filamin-3) (Thyroid autoantigen) (Truncated actin-binding protein) (Truncated ABP)	FLNB FLN1L FLN3 TABP TAP	AFEYYPSTPGRYSIA	1.086	1.14416	0.119024	0.194295	1.09919	1.02403	0.136441	0.0342544	13000000	42600000	14100000	37200000	27100000	79800000	7.43297	7.902	103243	16021
O75376	1	Nuclear receptor corepressor 1 OS=Homo sapiens GN=NCOR1 PE=1 SV=2 - [NCOR1_HUMAN]	O75376	S1111	Nuclear receptor corepressor 1 (N-CoR) (N-CoR1)	NCOR1 KIAA1047	YIKQEEFSPRSQNSQ	1.124	0.598802	0.168642	-0.739848	1.13765	0.535928	0.186059	-0.899889	30100000	15800000	33800000	26300000	63900000	42100000	7.8055	7.62428	38217	56006	CMGC/CDK/CDC2	CDK2
O75376	1	Nuclear receptor corepressor 1 OS=Homo sapiens GN=NCOR1 PE=1 SV=2 - [NCOR1_HUMAN]	O75376	S1281	Nuclear receptor corepressor 1 (N-CoR) (N-CoR1)	NCOR1 KIAA1047	CRALPRGSPHSDLKE	0.928	1.02987	-0.107803	0.0424568	0.939271	0.92173	-0.0903862	-0.117584	71600000	83500000	66500000	81100000	138100000	164600000	8.14019	8.21643	47610	72802
O75376	1	Nuclear receptor corepressor 1 OS=Homo sapiens GN=NCOR1 PE=1 SV=2 - [NCOR1_HUMAN]	O75376	S1322	Nuclear receptor corepressor 1 (N-CoR) (N-CoR1)	NCOR1 KIAA1047	PKQIKRESPPIRAFE	0.836	1.04932	-0.258425	0.0694519	0.846154	0.93914	-0.241008	-0.0905885	13700000	16900000	11500000	16100000	25200000	33000000	7.4014	7.51851	52502	83517
O75376	1	Nuclear receptor corepressor 1 OS=Homo sapiens GN=NCOR1 PE=1 SV=2 - [NCOR1_HUMAN]	O75376	S1472	Nuclear receptor corepressor 1 (N-CoR) (N-CoR1)	NCOR1 KIAA1047	EAPKAQLSPGIYDDT	1.092	1.15207	0.126973	0.204233	1.10526	1.03111	0.14439	0.0441926	187000000	107000000	204000000	92800000	391000000	199800000	8.59218	8.3006	5099	117171	CMGC/DYRK	HIPK2, PRP4
O75376	1	Nuclear receptor corepressor 1 OS=Homo sapiens GN=NCOR1 PE=1 SV=2 - [NCOR1_HUMAN]	O75376	S158	Nuclear receptor corepressor 1 (N-CoR) (N-CoR1)	NCOR1 KIAA1047	GKHEAPSSPISGQPC	1.002	1.28041	0.00288251	0.356606	1.01417	1.14597	0.0202996	0.196565	37800000	28400000	37900000	22200000	75700000	50600000	7.8791	7.70415	35309	50474	Atypical/PIKK/FRAP	FRAP
O75376	1	Nuclear receptor corepressor 1 OS=Homo sapiens GN=NCOR1 PE=1 SV=2 - [NCOR1_HUMAN]	O75376	S2151	Nuclear receptor corepressor 1 (N-CoR) (N-CoR1)	NCOR1 KIAA1047	SEPYEPISPPQVPVV	0.775	1.39082	-0.367732	0.475936	0.784413	1.24478	-0.350315	0.315896	35500000	53000000	27500000	38100000	63000000	91100000	7.79934	7.95952	46403	163338	CMGC/GSK	GSK3A
O75376	1	Nuclear receptor corepressor 1 OS=Homo sapiens GN=NCOR1 PE=1 SV=2 - [NCOR1_HUMAN]	O75376	S2184	Nuclear receptor corepressor 1 (N-CoR) (N-CoR1)	NCOR1 KIAA1047	EQRNDARSPGSISYL	0.95	1.03734	-0.0740006	0.0528949	0.961538	0.928423	-0.0565835	-0.107145	44700000	145000000	42500000	140000000	87200000	285000000	7.94052	8.45484	38804	56570	Atypical/PIKK/FRAP	FRAP
O75379	1	Vesicle-associated membrane protein 4 OS=Homo sapiens GN=VAMP4 PE=1 SV=2 - [VAMP4_HUMAN]	O75379	S30	Vesicle-associated membrane protein 4 (VAMP-4)	VAMP4	RNLLEDDSDEEEDFF	1.043	0.965251	0.0607392	-0.051024	1.05567	0.8639	0.0781562	-0.211064	18500000	108000000	19300000	112000000	37800000	220000000	7.57749	8.34242	26706	126209	Other/CK2	CK2a1, CK2a2
O75382	1	Tripartite motif-containing protein 3 OS=Homo sapiens GN=TRIM3 PE=1 SV=1 - [TRIM3_HUMAN]	O75382	S437	Tripartite motif-containing protein 3 (Brain-expressed RING finger protein) (RING finger protein 22) (RING finger protein 97)	TRIM3 BERP RNF22 RNF97	DVKRRVKSPGGPGSH	0.953	1.03306	-0.0694519	0.046921	0.964575	0.924587	-0.0520348	-0.113119	79700000	69600000	75900000	67400000	155600000	137000000	8.19201	8.13672	52074	83098	CAMK/CAMK2	CaMK2g
O75382	1	Tripartite motif-containing protein 3 OS=Homo sapiens GN=TRIM3 PE=1 SV=1 - [TRIM3_HUMAN]	O75382	S7	Tripartite motif-containing protein 3 (Brain-expressed RING finger protein) (RING finger protein 22) (RING finger protein 97)	TRIM3 BERP RNF22 RNF97	*MAKREDSPGPEVQP	1.062	1.03627	0.0867838	0.0513992	1.0749	0.927461	0.104201	-0.108641	174000000	88900000	185000000	85800000	359000000	174700000	8.55509	8.24229	35481	53727	CAMK/CAMK2	CaMK2g
O75385	1	Serine/threonine-protein kinase ULK1 OS=Homo sapiens GN=ULK1 PE=1 SV=1 - [ULK1_HUMAN]	O75385	S450	Serine/threonine-protein kinase ULK1 (EC 2.7.11.1) (Autophagy-related protein 1 homolog) (ATG1) (hATG1) (Unc-51-like kinase 1)	ULK1 KIAA0722	RIERNLQSPTQFQTP	1.016	0.837521	0.0229004	-0.255803	1.02834	0.749581	0.0403175	-0.415843	18400000	35400000	18700000	42200000	37100000	77600000	7.56937	7.88986	70741	27707	Atypical/PIKK/FRAP	FRAP
O75385	1	Serine/threonine-protein kinase ULK1 OS=Homo sapiens GN=ULK1 PE=1 SV=1 - [ULK1_HUMAN]	O75385	S469	Serine/threonine-protein kinase ULK1 (EC 2.7.11.1) (Autophagy-related protein 1 homolog) (ATG1) (hATG1) (Unc-51-like kinase 1)	ULK1 KIAA0722	IRRSGSTSPLGFARA	1.353	1.03199	0.436162	0.0454314	1.36943	0.923633	0.453579	-0.114609	13700000	51800000	18500000	50200000	32200000	102000000	7.50786	8.0086	71047	28087	Atypical/PIKK/FRAP	FRAP
O75385	1	Serine/threonine-protein kinase ULK1 OS=Homo sapiens GN=ULK1 PE=1 SV=1 - [ULK1_HUMAN]	O75385	S539	Serine/threonine-protein kinase ULK1 (EC 2.7.11.1) (Autophagy-related protein 1 homolog) (ATG1) (hATG1) (Unc-51-like kinase 1)	ULK1 KIAA0722	RSPRPGSSAPEHSPR	1.065	1.29199	0.0908534	0.369595	1.07794	1.15633	0.10827	0.209554	8590000	2540000	9160000	1960000	17750000	4500000	7.2492	6.65321	52062	167999
O75385	1	Serine/threonine-protein kinase ULK1 OS=Homo sapiens GN=ULK1 PE=1 SV=1 - [ULK1_HUMAN]	O75385	S556	Serine/threonine-protein kinase ULK1 (EC 2.7.11.1) (Autophagy-related protein 1 homolog) (ATG1) (hATG1) (Unc-51-like kinase 1)	ULK1 KIAA0722	GLGCRLHSAPNLSDL	0.97	1.5083	-0.0439433	0.592919	0.981781	1.34992	-0.0265263	0.432879	4330000	16200000	4210000	10800000	8540000	27000000	6.93146	7.43136	57317	89851	CAMK/CAMK2	CaMK2g
O75385	1	Serine/threonine-protein kinase ULK1 OS=Homo sapiens GN=ULK1 PE=1 SV=1 - [ULK1_HUMAN]	O75385	S623	Serine/threonine-protein kinase ULK1 (EC 2.7.11.1) (Autophagy-related protein 1 homolog) (ATG1) (hATG1) (Unc-51-like kinase 1)	ULK1 KIAA0722	PLPPILGSPTKAVPS	0.982	1.14025	-0.0262051	0.189351	0.993927	1.02052	-0.00878802	0.0293108	69800000	86800000	68500000	76100000	138300000	162900000	8.14082	8.21192	6300	119841	Atypical/PIKK/FRAP	FRAP
O75385	1	Serine/threonine-protein kinase ULK1 OS=Homo sapiens GN=ULK1 PE=1 SV=1 - [ULK1_HUMAN]	O75385	S638	Serine/threonine-protein kinase ULK1 (EC 2.7.11.1) (Autophagy-related protein 1 homolog) (ATG1) (hATG1) (Unc-51-like kinase 1)	ULK1 KIAA0722	FDFPKTPSSQNLLAL	1.201	1.26422	0.264236	0.33825	1.21559	1.13148	0.281653	0.17821	7960000	45200000	9560000	35700000	17520000	80900000	7.24353	7.90795	6790	30618
O75396	1	Vesicle-trafficking protein SEC22b OS=Homo sapiens GN=SEC22B PE=1 SV=3 - [SC22B_HUMAN]	O75396	S137	Vesicle-trafficking protein SEC22b (ER-Golgi SNARE of 24 kDa) (ERS-24) (ERS24) (SEC22 vesicle-trafficking protein homolog B) (SEC22 vesicle-trafficking protein-like 1)	SEC22B SEC22L1	RARRNLGSINTELQD	1.885	2.04082	0.914565	1.02915	1.90789	1.82653	0.931982	0.869106	56500000	57700000	107000000	28300000	163500000	86000000	8.21352	7.9345	6216	119459
O75400	1	Pre-mRNA-processing factor 40 homolog A OS=Homo sapiens GN=PRPF40A PE=1 SV=2 - [PR40A_HUMAN]	O75400	S888	Pre-mRNA-processing factor 40 homolog A (Fas ligand-associated factor 1) (Formin-binding protein 11) (Formin-binding protein 3) (Huntingtin yeast partner A) (Huntingtin-interacting protein 10) (HIP-10) (Huntingtin-interacting protein A) (Renal carcinoma antigen NY-REN-6)	PRPF40A FBP11 FLAF1 FNBP3 HIP10 HYPA HSPC225	HKSDSPESDAEREKD	0.822	0.838223	-0.28279	-0.254594	0.831984	0.75021	-0.265373	-0.414634	6440000	3640000	5300000	4340000	11740000	7980000	7.06967	6.902	60357	93152	Other/PEK	HRI, PEK, PKR
O75410	1	Transforming acidic coiled-coil-containing protein 1 OS=Homo sapiens GN=TACC1 PE=1 SV=2 - [TACC1_HUMAN]	O75410	S276	Transforming acidic coiled-coil-containing protein 1 (Gastric cancer antigen Ga55) (Taxin-1)	TACC1 KIAA1103	EELDENTSPLLGDAR	1.136	1.12486	0.183963	0.169745	1.1498	1.00675	0.20138	0.00970426	11700000	13300000	13300000	11800000	25000000	25100000	7.39794	7.39967	41730	132450	CMGC/CDK	PCTAIRE2
O75420	1	PERQ amino acid-rich with GYF domain-containing protein 1 OS=Homo sapiens GN=GIGYF1 PE=1 SV=2 - [PERQ1_HUMAN]	O75420	S230	PERQ amino acid-rich with GYF domain-containing protein 1 (GRB10-interacting GYF protein 1)	GIGYF1 CDS2 PERQ1 PP3360	GDRWRSASPDGGPRS	1.394	1.87266	0.479231	0.905088	1.41093	1.67603	0.496648	0.745048	1640000	2520000	2290000	1340000	3930000	3860000	6.59439	6.58659	73113	31567
O75420	1	PERQ amino acid-rich with GYF domain-containing protein 1 OS=Homo sapiens GN=GIGYF1 PE=1 SV=2 - [PERQ1_HUMAN]	O75420	S237	PERQ amino acid-rich with GYF domain-containing protein 1 (GRB10-interacting GYF protein 1)	GIGYF1 CDS2 PERQ1 PP3360	SPDGGPRSAGWREHG	1.394	1.87266	0.479231	0.905088	1.41093	1.67603	0.496648	0.745048	1640000	2520000	2290000	1340000	3930000	3860000	6.59439	6.58659	73113	31567
O75420	1	PERQ amino acid-rich with GYF domain-containing protein 1 OS=Homo sapiens GN=GIGYF1 PE=1 SV=2 - [PERQ1_HUMAN]	O75420	S24	PERQ amino acid-rich with GYF domain-containing protein 1 (GRB10-interacting GYF protein 1)	GIGYF1 CDS2 PERQ1 PP3360	SGGGSVASPPPSPAM	0.764	0.729927	-0.388355	-0.454176	0.773279	0.653285	-0.370938	-0.614216	4020000	26800000	3070000	36800000	7090000	63600000	6.85065	7.80346	21615	26761
O75420	1	PERQ amino acid-rich with GYF domain-containing protein 1 OS=Homo sapiens GN=GIGYF1 PE=1 SV=2 - [PERQ1_HUMAN]	O75420	S28	PERQ amino acid-rich with GYF domain-containing protein 1 (GRB10-interacting GYF protein 1)	GIGYF1 CDS2 PERQ1 PP3360	SVASPPPSPAMPKYK	0.764	0.267023	-0.388355	-1.90497	0.773279	0.238985	-0.370938	-2.06501	4020000	893000	3070000	3340000	7090000	4233000	6.85065	6.62665	21615	97983
O75420	1	PERQ amino acid-rich with GYF domain-containing protein 1 OS=Homo sapiens GN=GIGYF1 PE=1 SV=2 - [PERQ1_HUMAN]	O75420	S638	PERQ amino acid-rich with GYF domain-containing protein 1 (GRB10-interacting GYF protein 1)	GIGYF1 CDS2 PERQ1 PP3360	PTMSRSLSVPDSGRL	3.338	1.32802	1.73898	0.409278	3.37854	1.18858	1.7564	0.249238	28900000	32100000	96300000	24200000	125200000	56300000	8.0976	7.75051	4054	26721	AGC/AKT	AKT1
O75445	1	Usherin OS=Homo sapiens GN=USH2A PE=1 SV=3 - [USH2A_HUMAN]	O75445	S3503	Usherin (Usher syndrome type IIa protein) (Usher syndrome type-2A protein)	USH2A	EDVPQGVSPPTWTKI	1.047	1.22549	0.0662614	0.293359	1.05972	1.09681	0.0836785	0.133319	52800000	21700000	55300000	17700000	108100000	39400000	8.03383	7.5955	81860	57402
O75448	1	Mediator of RNA polymerase II transcription subunit 24 OS=Homo sapiens GN=MED24 PE=1 SV=1 - [MED24_HUMAN]	O75448	S862	Mediator of RNA polymerase II transcription subunit 24 (Activator-recruited cofactor 100 kDa component) (ARC100) (Cofactor required for Sp1 transcriptional activation subunit 4) (CRSP complex subunit 4) (Mediator complex subunit 24) (Thyroid hormone receptor-associated protein 4) (Thyroid hormone receptor-associated protein complex 100 kDa component) (Trap100) (hTRAP100) (Vitamin D3 receptor-inte…	MED24 ARC100 CRSP4 DRIP100 KIAA0130 THRAP4 TRAP100	SKLMRLLSSNEDDAN	1.04	1.13636	0.0565835	0.184425	1.05263	1.01705	0.0740006	0.0243842	4940000	10400000	5140000	9120000	10080000	19520000	7.00346	7.29048	102419	19870
O75448	1	Mediator of RNA polymerase II transcription subunit 24 OS=Homo sapiens GN=MED24 PE=1 SV=1 - [MED24_HUMAN]	O75448	S873	Mediator of RNA polymerase II transcription subunit 24 (Activator-recruited cofactor 100 kDa component) (ARC100) (Cofactor required for Sp1 transcriptional activation subunit 4) (CRSP complex subunit 4) (Mediator complex subunit 24) (Thyroid hormone receptor-associated protein 4) (Thyroid hormone receptor-associated protein complex 100 kDa component) (Trap100) (hTRAP100) (Vitamin D3 receptor-inte…	MED24 ARC100 CRSP4 DRIP100 KIAA0130 THRAP4 TRAP100	DDANILSSPTDRSMS	0.973	1.08578	-0.0394883	0.118727	0.984818	0.97177	-0.0220712	-0.0413135	228000000	60600000	222000000	55800000	450000000	116400000	8.65321	8.06595	5702	117987	CMGC/CDK	CDK11, CDK8
O75475	1	PC4 and SFRS1-interacting protein OS=Homo sapiens GN=PSIP1 PE=1 SV=1 - [PSIP1_HUMAN]	O75475	S105	PC4 and SFRS1-interacting protein (CLL-associated antigen KW-7) (Dense fine speckles 70 kDa protein) (DFS 70) (Lens epithelium-derived growth factor) (Transcriptional coactivator p75/p52)	PSIP1 DFS70 LEDGF PSIP2	ATKQSNASSDVEVEE	9.597	0.841043	3.26258	-0.249749	9.71356	0.752733	3.28	-0.409789	318000	2660000	3050000	3160000	3368000	5820000	6.52737	6.76492	12885	12689	STE/STE20	NRK
O75475	1	PC4 and SFRS1-interacting protein OS=Homo sapiens GN=PSIP1 PE=1 SV=1 - [PSIP1_HUMAN]	O75475	S106	PC4 and SFRS1-interacting protein (CLL-associated antigen KW-7) (Dense fine speckles 70 kDa protein) (DFS 70) (Lens epithelium-derived growth factor) (Transcriptional coactivator p75/p52)	PSIP1 DFS70 LEDGF PSIP2	TKQSNASSDVEVEEK	0.893	1.0929	-0.163268	0.128156	0.903846	0.978142	-0.145851	-0.0318841	73300000	376000000	65500000	344000000	138800000	720000000	8.14239	8.85733	75150	113064	STE/STE20	NRK
O75475	1	PC4 and SFRS1-interacting protein OS=Homo sapiens GN=PSIP1 PE=1 SV=1 - [PSIP1_HUMAN]	O75475	S129	PC4 and SFRS1-interacting protein (CLL-associated antigen KW-7) (Dense fine speckles 70 kDa protein) (DFS 70) (Lens epithelium-derived growth factor) (Transcriptional coactivator p75/p52)	PSIP1 DFS70 LEDGF PSIP2	TDHEEKASNEDVTKA	1.014	1.13766	0.0200577	0.186065	1.02632	1.0182	0.0374747	0.0260245	68900000	11600000	69900000	10200000	138800000	21800000	8.14239	7.33846	52612	83056
O75475	1	PC4 and SFRS1-interacting protein OS=Homo sapiens GN=PSIP1 PE=1 SV=1 - [PSIP1_HUMAN]	O75475	S514	PC4 and SFRS1-interacting protein (CLL-associated antigen KW-7) (Dense fine speckles 70 kDa protein) (DFS 70) (Lens epithelium-derived growth factor) (Transcriptional coactivator p75/p52)	PSIP1 DFS70 LEDGF PSIP2	STKKKPSSEERETEI	0.91	1.68919	-0.136062	0.756331	0.921053	1.51182	-0.118644	0.596291	4680000	9330000	4260000	5520000	8940000	14850000	6.95134	7.17173	57999	88148	AGC/PKC	PKCg
O75475	1	PC4 and SFRS1-interacting protein OS=Homo sapiens GN=PSIP1 PE=1 SV=1 - [PSIP1_HUMAN]	O75475	T122	PC4 and SFRS1-interacting protein (CLL-associated antigen KW-7) (Dense fine speckles 70 kDa protein) (DFS 70) (Lens epithelium-derived growth factor) (Transcriptional coactivator p75/p52)	PSIP1 DFS70 LEDGF PSIP2	TSVSKEDTDHEEKAS	1.089	1.12994	0.123004	0.176251	1.10223	1.0113	0.140421	0.0162102	75100000	16700000	81700000	14800000	156800000	31500000	8.19535	7.49831	84523	72954
O75494	1	FUS-interacting serine-arginine-rich protein 1 OS=Homo sapiens GN=FUSIP1 PE=1 SV=1 - [FUSIP_HUMAN]	O75494	S106	Serine/arginine-rich splicing factor 10 (40 kDa SR-repressor protein) (SRrp40) (FUS-interacting serine-arginine-rich protein 1) (Splicing factor SRp38) (Splicing factor, arginine/serine-rich 13A) (TLS-associated protein with Ser-Arg repeats) (TASR) (TLS-associated protein with SR repeats) (TLS-associated serine-arginine protein) (TLS-associated SR protein)	SRSF10 FUSIP1 FUSIP2 SFRS13A TASR	KEGRNVYSSSRYDDY	1.003	1.27714	0.00432161	0.352916	1.01518	1.14304	0.0217387	0.192875	55500000	15700000	55700000	12300000	111200000	28000000	8.0461	7.44716	36636	60539
O75494	1	FUS-interacting serine-arginine-rich protein 1 OS=Homo sapiens GN=FUSIP1 PE=1 SV=1 - [FUSIP_HUMAN]	O75494	S131	Serine/arginine-rich splicing factor 10 (40 kDa SR-repressor protein) (SRrp40) (FUS-interacting serine-arginine-rich protein 1) (Splicing factor SRp38) (Splicing factor, arginine/serine-rich 13A) (TLS-associated protein with Ser-Arg repeats) (TASR) (TLS-associated protein with SR repeats) (TLS-associated serine-arginine protein) (TLS-associated SR protein)	SRSF10 FUSIP1 FUSIP2 SFRS13A TASR	YERRRSRSRSFDYNY	1.14	1.3624	0.189034	0.446148	1.15385	1.21935	0.206451	0.286108	6560000	2670000	7480000	1960000	14040000	4630000	7.14737	6.66558	84997	65913	AGC/PKC	PKCb
O75494	1	FUS-interacting serine-arginine-rich protein 1 OS=Homo sapiens GN=FUSIP1 PE=1 SV=1 - [FUSIP_HUMAN]	O75494	S133	Serine/arginine-rich splicing factor 10 (40 kDa SR-repressor protein) (SRrp40) (FUS-interacting serine-arginine-rich protein 1) (Splicing factor SRp38) (Splicing factor, arginine/serine-rich 13A) (TLS-associated protein with Ser-Arg repeats) (TASR) (TLS-associated protein with SR repeats) (TLS-associated serine-arginine protein) (TLS-associated SR protein)	SRSF10 FUSIP1 FUSIP2 SFRS13A TASR	RRRSRSRSFDYNYRR	1.207	1.71821	0.271426	0.780909	1.22166	1.5378	0.288843	0.620869	6940000	9770000	8380000	5690000	15320000	15460000	7.18526	7.18921	43282	89321	AGC/PKC	PKCb
O75494	1	FUS-interacting serine-arginine-rich protein 1 OS=Homo sapiens GN=FUSIP1 PE=1 SV=1 - [FUSIP_HUMAN]	O75494	S23	Serine/arginine-rich splicing factor 10 (40 kDa SR-repressor protein) (SRrp40) (FUS-interacting serine-arginine-rich protein 1) (Splicing factor SRp38) (Splicing factor, arginine/serine-rich 13A) (TLS-associated protein with Ser-Arg repeats) (TASR) (TLS-associated protein with SR repeats) (TLS-associated serine-arginine protein) (TLS-associated SR protein)	SRSF10 FUSIP1 FUSIP2 SFRS13A TASR	NVADDTRSEDLRREF	1.072	1.34771	0.100305	0.430509	1.08502	1.2062	0.117722	0.270468	17600000	11400000	18900000	8470000	36500000	19870000	7.56229	7.2982	91594	78019
O75508	1	Claudin-11 OS=Homo sapiens GN=CLDN11 PE=1 SV=2 - [CLD11_HUMAN]	O75508	S196	Claudin-11 (Oligodendrocyte-specific protein)	CLDN11 OSP OTM	RFYYTAGSSSPTHAK	1.151	1.27714	0.202888	0.352916	1.16498	1.14304	0.220305	0.192875	72900000	102000000	83900000	79700000	156800000	181700000	8.19535	8.25935	36228	134692
O75508	1	Claudin-11 OS=Homo sapiens GN=CLDN11 PE=1 SV=2 - [CLD11_HUMAN]	O75508	S198	Claudin-11 (Oligodendrocyte-specific protein)	CLDN11 OSP OTM	YYTAGSSSPTHAKSA	1.026	1.12867	0.0370307	0.174621	1.03846	1.01016	0.0544478	0.014581	174000000	147000000	178000000	130000000	352000000	277000000	8.54654	8.44248	36533	51285	STE/STE11	MAP3K2
O75533	1	Splicing factor 3B subunit 1 OS=Homo sapiens GN=SF3B1 PE=1 SV=2 - [SF3B1_HUMAN]	O75533	S129	Splicing factor 3B subunit 1 (Pre-mRNA-splicing factor SF3b 155 kDa subunit) (SF3b155) (Spliceosome-associated protein 155) (SAP 155)	SF3B1 SAP155	HRRTMIISPERLDPF	0.967	1.49925	-0.0484122	0.584241	0.978745	1.34183	-0.0309952	0.424201	12200000	70300000	11800000	46900000	24000000	117200000	7.38021	8.06893	34825	49800	CMGC/DYRK	DYRK1A, DYRK1B
O75533	1	Splicing factor 3B subunit 1 OS=Homo sapiens GN=SF3B1 PE=1 SV=2 - [SF3B1_HUMAN]	O75533	S194	Splicing factor 3B subunit 1 (Pre-mRNA-splicing factor SF3b 155 kDa subunit) (SF3b155) (Spliceosome-associated protein 155) (SAP 155)	SF3B1 SAP155	AAASQPPSKRKRRWD	1.055	1.21212	0.077243	0.277534	1.06781	1.08485	0.0946601	0.117494	211000000	400000000	223000000	330000000	434000000	730000000	8.63749	8.86332	3011	112326	CMGC/DYRK	DYRK1A, DYRK1B
O75533	1	Splicing factor 3B subunit 1 OS=Homo sapiens GN=SF3B1 PE=1 SV=2 - [SF3B1_HUMAN]	O75533	T142	Splicing factor 3B subunit 1 (Pre-mRNA-splicing factor SF3b 155 kDa subunit) (SF3b155) (Spliceosome-associated protein 155) (SAP 155)	SF3B1 SAP155	PFADGGKTPDPKMNV	1.081	1.06724	0.112367	0.093879	1.09413	0.955176	0.129784	-0.0661614	25800000	33800000	27900000	31700000	53700000	65500000	7.72997	7.81624	33790	125469
O75533	1	Splicing factor 3B subunit 1 OS=Homo sapiens GN=SF3B1 PE=1 SV=2 - [SF3B1_HUMAN]	O75533	T207	Splicing factor 3B subunit 1 (Pre-mRNA-splicing factor SF3b 155 kDa subunit) (SF3b155) (Spliceosome-associated protein 155) (SAP 155)	SF3B1 SAP155	WDQTADQTPGATPKK	0.814	1.14548	-0.296899	0.195946	0.823887	1.0252	-0.279482	0.035906	13000000	7730000	10600000	6750000	23600000	14480000	7.37291	7.16077	92087	89242	CMGC/CDK/CDC2	CDK2
O75533	1	Splicing factor 3B subunit 1 OS=Homo sapiens GN=SF3B1 PE=1 SV=2 - [SF3B1_HUMAN]	O75533	T211	Splicing factor 3B subunit 1 (Pre-mRNA-splicing factor SF3b 155 kDa subunit) (SF3b155) (Spliceosome-associated protein 155) (SAP 155)	SF3B1 SAP155	ADQTPGATPKKLSSW	1.106	1.33156	0.145351	0.413115	1.11943	1.19174	0.162768	0.253075	111000000	132000000	123000000	99300000	234000000	231300000	8.36922	8.36418	3880	26510	CMGC/CDK/CDC2	CDK2
O75533	1	Splicing factor 3B subunit 1 OS=Homo sapiens GN=SF3B1 PE=1 SV=2 - [SF3B1_HUMAN]	O75533	T223	Splicing factor 3B subunit 1 (Pre-mRNA-splicing factor SF3b 155 kDa subunit) (SF3b155) (Spliceosome-associated protein 155) (SAP 155)	SF3B1 SAP155	SSWDQAETPGHTPSL	0.961	1.23153	-0.0573917	0.300448	0.972672	1.10222	-0.0399746	0.140408	93700000	107000000	90100000	86700000	183800000	193700000	8.26435	8.28713	48553	73817	CMGC/CDK/CDC2	CDK2
O75533	1	Splicing factor 3B subunit 1 OS=Homo sapiens GN=SF3B1 PE=1 SV=2 - [SF3B1_HUMAN]	O75533	T227	Splicing factor 3B subunit 1 (Pre-mRNA-splicing factor SF3b 155 kDa subunit) (SF3b155) (Spliceosome-associated protein 155) (SAP 155)	SF3B1 SAP155	QAETPGHTPSLRWDE	1.03	1.41044	0.0426443	0.496142	1.04251	1.26234	0.0600614	0.336102	16800000	29600000	17300000	21000000	34100000	50600000	7.53275	7.70415	48531	73786	CMGC/CDK/CDC2	CDK2
O75533	1	Splicing factor 3B subunit 1 OS=Homo sapiens GN=SF3B1 PE=1 SV=2 - [SF3B1_HUMAN]	O75533	T235	Splicing factor 3B subunit 1 (Pre-mRNA-splicing factor SF3b 155 kDa subunit) (SF3b155) (Spliceosome-associated protein 155) (SAP 155)	SF3B1 SAP155	PSLRWDETPGRAKGS	0.965	1.22399	-0.0513992	0.291592	0.976721	1.09547	-0.0339821	0.131552	46400000	121000000	44700000	98900000	91100000	219900000	7.95952	8.34223	3582	108766	CMGC/CDK/CDC2	CDK2
O75533	1	Splicing factor 3B subunit 1 OS=Homo sapiens GN=SF3B1 PE=1 SV=2 - [SF3B1_HUMAN]	O75533	T296	Splicing factor 3B subunit 1 (Pre-mRNA-splicing factor SF3b 155 kDa subunit) (SF3b155) (Spliceosome-associated protein 155) (SAP 155)	SF3B1 SAP155	RKNRWDETPKTERDT	0.944	1.37552	-0.0831412	0.459973	0.955466	1.23109	-0.0657242	0.299932	29700000	12100000	28000000	8820000	57700000	20920000	7.76118	7.32056	54849	85892	CMGC/CDK/CDC2	CDK2
O75533	1	Splicing factor 3B subunit 1 OS=Homo sapiens GN=SF3B1 PE=1 SV=2 - [SF3B1_HUMAN]	O75533	T313	Splicing factor 3B subunit 1 (Pre-mRNA-splicing factor SF3b 155 kDa subunit) (SF3b155) (Spliceosome-associated protein 155) (SAP 155)	SF3B1 SAP155	HGSGWAETPRTDRGG	1.038	1.10497	0.0538064	0.14401	1.05061	0.98895	0.0712235	-0.0160301	86400000	83100000	89600000	75200000	176000000	158300000	8.24551	8.19948	47895	72923	CMGC/CDK/CDC2	CDK2
O75533	1	Splicing factor 3B subunit 1 OS=Homo sapiens GN=SF3B1 PE=1 SV=2 - [SF3B1_HUMAN]	O75533	T326	Splicing factor 3B subunit 1 (Pre-mRNA-splicing factor SF3b 155 kDa subunit) (SF3b155) (Spliceosome-associated protein 155) (SAP 155)	SF3B1 SAP155	GGDSIGETPTPGASK	0.981	1.1236	-0.027675	0.168123	0.992915	1.00562	-0.0102579	0.00808235	766000000	253000000	752000000	225000000	1518000000	478000000	9.18127	8.67943	3188	108478	CMGC/CDK/CDC2	CDK2
O75533	1	Splicing factor 3B subunit 1 OS=Homo sapiens GN=SF3B1 PE=1 SV=2 - [SF3B1_HUMAN]	O75533	T350	Splicing factor 3B subunit 1 (Pre-mRNA-splicing factor SF3b 155 kDa subunit) (SF3b155) (Spliceosome-associated protein 155) (SAP 155)	SF3B1 SAP155	ASQMGGSTPVLTPGK	1.03	1.23762	0.0426443	0.307573	1.04251	1.10767	0.0600614	0.147532	170000000	64700000	175000000	52300000	345000000	117000000	8.53782	8.06819	40836	60737	CMGC/DYRK	DYRK1A, DYRK1B
O75569	1	Interferon-inducible double stranded RNA-dependent protein kinase activator A OS=Homo sapiens GN=PRKRA PE=1 SV=1 - [PRKRA_HUMAN]	O75569	S18	Interferon-inducible double stranded RNA-dependent protein kinase activator A (PKR-associated protein X) (PKR-associating protein X) (Protein activator of the interferon-induced protein kinase) (Protein kinase, interferon-inducible double stranded RNA-dependent activator)	PRKRA PACT RAX HSD-14 HSD14	PPLEREDSGTFSLGK	1.314	1.21507	0.393965	0.281036	1.32996	1.08748	0.411382	0.120995	37400000	27100000	49100000	22300000	86500000	49400000	7.93702	7.69373	76455	125606	Other/NEK	NEK1
O75592	1	Probable E3 ubiquitin-protein ligase MYCBP2 OS=Homo sapiens GN=MYCBP2 PE=1 SV=3 - [MYCB2_HUMAN]	O75592	S2751	Probable E3 ubiquitin-protein ligase MYCBP2 (EC 6.3.2.-) (Myc-binding protein 2) (Pam/highwire/rpm-1 protein) (Protein associated with Myc)	MYCBP2 KIAA0916 PAM	DSHSRSLSPNHNTLQ	0.9	1.05932	-0.152003	0.0831412	0.910931	0.948093	-0.134586	-0.0768992	68200000	143000000	61400000	135000000	129600000	278000000	8.11261	8.44404	36760	51520	Atypical/PIKK/FRAP	FRAP
O75592	1	Probable E3 ubiquitin-protein ligase MYCBP2 OS=Homo sapiens GN=MYCBP2 PE=1 SV=3 - [MYCB2_HUMAN]	O75592	S2774	Probable E3 ubiquitin-protein ligase MYCBP2 (EC 6.3.2.-) (Myc-binding protein 2) (Pam/highwire/rpm-1 protein) (Protein associated with Myc)	MYCBP2 KIAA0916 PAM	PSSSRAESPGPGSRL	0.773	0.692521	-0.37146	-0.530071	0.782389	0.619806	-0.354043	-0.690111	18600000	4080000	14400000	5900000	33000000	9980000	7.51851	6.99913	39047	143532	Atypical/PIKK/FRAP	FRAP
O75592	1	Probable E3 ubiquitin-protein ligase MYCBP2 OS=Homo sapiens GN=MYCBP2 PE=1 SV=3 - [MYCB2_HUMAN]	O75592	S2831	Probable E3 ubiquitin-protein ligase MYCBP2 (EC 6.3.2.-) (Myc-binding protein 2) (Pam/highwire/rpm-1 protein) (Protein associated with Myc)	MYCBP2 KIAA0916 PAM	LDPPRERSKSDSYTL	1.1	1.20919	0.137504	0.274041	1.11336	1.08222	0.154921	0.114	67600000	27200000	74400000	22500000	142000000	49700000	8.15229	7.69636	46060	148489	AGC/AKT	AKT1
O75592	1	Probable E3 ubiquitin-protein ligase MYCBP2 OS=Homo sapiens GN=MYCBP2 PE=1 SV=3 - [MYCB2_HUMAN]	O75592	S2833	Probable E3 ubiquitin-protein ligase MYCBP2 (EC 6.3.2.-) (Myc-binding protein 2) (Pam/highwire/rpm-1 protein) (Protein associated with Myc)	MYCBP2 KIAA0916 PAM	PPRERSKSDSYTLDP	1.1	1.1534	0.137504	0.205896	1.11336	1.0323	0.154921	0.0458557	67600000	28800000	74400000	25000000	142000000	53800000	8.15229	7.73078	46060	162926	AGC/AKT	AKT1
O75592	1	Probable E3 ubiquitin-protein ligase MYCBP2 OS=Homo sapiens GN=MYCBP2 PE=1 SV=3 - [MYCB2_HUMAN]	O75592	S2947	Probable E3 ubiquitin-protein ligase MYCBP2 (EC 6.3.2.-) (Myc-binding protein 2) (Pam/highwire/rpm-1 protein) (Protein associated with Myc)	MYCBP2 KIAA0916 PAM	DEQEMRASPKISRKC	0.697	0.677048	-0.520769	-0.56267	0.705466	0.605958	-0.503352	-0.72271	203000000	143000000	141000000	211000000	344000000	354000000	8.53656	8.549	47139	164488
O75592	1	Probable E3 ubiquitin-protein ligase MYCBP2 OS=Homo sapiens GN=MYCBP2 PE=1 SV=3 - [MYCB2_HUMAN]	O75592	S3438	Probable E3 ubiquitin-protein ligase MYCBP2 (EC 6.3.2.-) (Myc-binding protein 2) (Pam/highwire/rpm-1 protein) (Protein associated with Myc)	MYCBP2 KIAA0916 PAM	KRTVFQRSYSVVASE	1.265	0.646831	0.339137	-0.62854	1.28036	0.578913	0.356554	-0.788581	993000	8410000	1260000	13000000	2253000	21410000	6.35276	7.33062	25532	110197
O75592	1	Probable E3 ubiquitin-protein ligase MYCBP2 OS=Homo sapiens GN=MYCBP2 PE=1 SV=3 - [MYCB2_HUMAN]	O75592	S3440	Probable E3 ubiquitin-protein ligase MYCBP2 (EC 6.3.2.-) (Myc-binding protein 2) (Pam/highwire/rpm-1 protein) (Protein associated with Myc)	MYCBP2 KIAA0916 PAM	TVFQRSYSVVASEYD	2.389	1.42045	1.25641	0.506353	2.41802	1.27131	1.27382	0.346312	15400000	14900000	36800000	10500000	52200000	25400000	7.71767	7.40483	5098	117195	AGC/AKT	AKT1
O75592	1	Probable E3 ubiquitin-protein ligase MYCBP2 OS=Homo sapiens GN=MYCBP2 PE=1 SV=3 - [MYCB2_HUMAN]	O75592	S3467	Probable E3 ubiquitin-protein ligase MYCBP2 (EC 6.3.2.-) (Myc-binding protein 2) (Pam/highwire/rpm-1 protein) (Protein associated with Myc)	MYCBP2 KIAA0916 PAM	IPRRRVNSGDTEVGS	1.353	1.10988	0.436162	0.150401	1.36943	0.993341	0.453579	-0.00963942	46000000	30000000	62200000	27000000	108200000	57000000	8.03423	7.75587	5313	117942	AGC/AKT	AKT1
O75592	1	Probable E3 ubiquitin-protein ligase MYCBP2 OS=Homo sapiens GN=MYCBP2 PE=1 SV=3 - [MYCB2_HUMAN]	O75592	T2645	Probable E3 ubiquitin-protein ligase MYCBP2 (EC 6.3.2.-) (Myc-binding protein 2) (Pam/highwire/rpm-1 protein) (Protein associated with Myc)	MYCBP2 KIAA0916 PAM	LLDQNSQTPPPSPFS	0.883	1.28535	-0.179515	0.362158	0.893725	1.15039	-0.162098	0.202118	20400000	13500000	18000000	10500000	38400000	24000000	7.58433	7.38021	83752	146282	Atypical/PIKK/FRAP	FRAP
O75676	1	Ribosomal protein S6 kinase alpha-4 OS=Homo sapiens GN=RPS6KA4 PE=1 SV=1 - [KS6A4_HUMAN]	O75676	S347	Ribosomal protein S6 kinase alpha-4 (S6K-alpha-4) (EC 2.7.11.1) (90 kDa ribosomal protein S6 kinase 4) (Nuclear mitogen- and stress-activated protein kinase 2) (Ribosomal protein kinase B) (RSKB)	RPS6KA4 MSK2	PVYSPPGSPPPGDPR	1.363	2.42131	0.446786	1.27579	1.37955	2.16707	0.464203	1.11575	1560000	6270000	2120000	2590000	3680000	8860000	6.56585	6.94743	11429	28099	Atypical/PIKK/FRAP	FRAP
O75676	1	Ribosomal protein S6 kinase alpha-4 OS=Homo sapiens GN=RPS6KA4 PE=1 SV=1 - [KS6A4_HUMAN]	O75676	S681	Ribosomal protein S6 kinase alpha-4 (S6K-alpha-4) (EC 2.7.11.1) (90 kDa ribosomal protein S6 kinase 4) (Nuclear mitogen- and stress-activated protein kinase 2) (Ribosomal protein kinase B) (RSKB)	RPS6KA4 MSK2	LQDGSARSSPPLRTP	1.026	0.74239	0.0370307	-0.42975	1.03846	0.664439	0.0544478	-0.58979	117000000	525000	120000000	708000	237000000	1233000	8.37475	6.09096	34193	58806	TKL/RAF	RAF1
O75676	1	Ribosomal protein S6 kinase alpha-4 OS=Homo sapiens GN=RPS6KA4 PE=1 SV=1 - [KS6A4_HUMAN]	O75676	S682	Ribosomal protein S6 kinase alpha-4 (S6K-alpha-4) (EC 2.7.11.1) (90 kDa ribosomal protein S6 kinase 4) (Nuclear mitogen- and stress-activated protein kinase 2) (Ribosomal protein kinase B) (RSKB)	RPS6KA4 MSK2	QDGSARSSPPLRTPD	1.158	1.08696	0.211635	0.120294	1.17206	0.972826	0.229052	-0.0397462	67100000	117000000	77700000	108000000	144800000	225000000	8.16077	8.35218	76472	48958	Atypical/PIKK/FRAP	FRAP
O75683	1	Surfeit locus protein 6 OS=Homo sapiens GN=SURF6 PE=1 SV=3 - [SURF6_HUMAN]	O75683	S138	Surfeit locus protein 6	SURF6 SURF-6	QGSAKELSPAALEKR	0.905	1.06045	-0.14401	0.0846703	0.915992	0.949099	-0.126593	-0.0753701	367000000	338000000	332000000	319000000	699000000	657000000	8.84448	8.81757	4875	116995
O75691	1	Small subunit processome component 20 homolog OS=Homo sapiens GN=UTP20 PE=1 SV=1 - [UTP20_HUMAN]	O75691	T1741	Small subunit processome component 20 homolog (Down-regulated in metastasis protein) (Novel nucleolar protein 73) (NNP73) (Protein Key-1A6)	UTP20 DRIM	SDNGQPGTPDPADSG	1.133	1.19904	0.180148	0.261881	1.14676	1.07314	0.197565	0.10184	321000000	93100000	364000000	77600000	685000000	170700000	8.83569	8.23223	3744	22578
O75694	1	Nuclear pore complex protein Nup155 OS=Homo sapiens GN=NUP155 PE=1 SV=1 - [NU155_HUMAN]	O75694	S992	Nuclear pore complex protein Nup155 (155 kDa nucleoporin) (Nucleoporin Nup155)	NUP155 KIAA0791	QSKAAPQSPSVPKKP	1.088	1.11359	0.121679	0.155213	1.10121	0.996659	0.139096	-0.00482776	207000000	299000000	225000000	269000000	432000000	568000000	8.63548	8.75435	3166	22238	CMGC/CDK	CDK4
O75717	1	WD repeat and HMG-box DNA-binding protein 1 OS=Homo sapiens GN=WDHD1 PE=1 SV=1 - [WDHD1_HUMAN]	O75717	S383	WD repeat and HMG-box DNA-binding protein 1 (Acidic nucleoplasmic DNA-binding protein 1) (And-1)	WDHD1 AND1	ILEDDENSVDISMLK	0.961	1.36612	-0.0573917	0.450084	0.972672	1.22268	-0.0399746	0.290044	10400000	24300000	10000000	17800000	20400000	42100000	7.30963	7.62428	83505	61604
O75717	1	WD repeat and HMG-box DNA-binding protein 1 OS=Homo sapiens GN=WDHD1 PE=1 SV=1 - [WDHD1_HUMAN]	O75717	S868	WD repeat and HMG-box DNA-binding protein 1 (Acidic nucleoplasmic DNA-binding protein 1) (And-1)	WDHD1 AND1	VEEDAEDSGEADDEE	0.992	1.37363	-0.011588	0.45799	1.00405	1.2294	0.00582908	0.297949	2350000	15200000	2330000	11100000	4680000	26300000	6.67025	7.41996	92350	78901	CMGC/MAPK	Erk2
O75781	1	Paralemmin OS=Homo sapiens GN=PALM PE=1 SV=2 - [PALM_HUMAN]	O75781	S116	Paralemmin-1 (Paralemmin)	PALM KIAA0270	KENAAAPSPVRAPAP	0.98	1.16009	-0.0291463	0.21424	0.991903	1.03828	-0.0117293	0.0541998	7680000	8730000	7520000	7520000	15200000	16250000	7.18184	7.21085	32763	43505
O75781	1	Paralemmin OS=Homo sapiens GN=PALM PE=1 SV=2 - [PALM_HUMAN]	O75781	S124	Paralemmin-1 (Paralemmin)	PALM KIAA0270	PVRAPAPSPAKEERK	1.008	1.0142	0.0114956	0.0203404	1.02024	0.907708	0.0289127	-0.1397	66600000	220000000	67200000	217000000	133800000	437000000	8.12646	8.64048	34876	133120
O75781	1	Paralemmin OS=Homo sapiens GN=PALM PE=1 SV=2 - [PALM_HUMAN]	O75781	T141	Paralemmin-1 (Paralemmin)	PALM KIAA0270	VVMNSQQTPVGTPKD	0.798	0.956938	-0.325539	-0.0635029	0.807692	0.856459	-0.308122	-0.223543	77100000	62700000	61500000	65500000	138600000	128200000	8.14176	8.10789	39791	59635
O75781	1	Paralemmin OS=Homo sapiens GN=PALM PE=1 SV=2 - [PALM_HUMAN]	O75781	T145	Paralemmin-1 (Paralemmin)	PALM KIAA0270	SQQTPVGTPKDKRVS	0.771	0.813008	-0.375197	-0.298658	0.780364	0.727642	-0.35778	-0.458699	34800000	36400000	26800000	44800000	61600000	81200000	7.78958	7.90956	39829	59941
O75808	1	Calpain-15 OS=Homo sapiens GN=SOLH PE=2 SV=1 - [CAN15_HUMAN]	O75808	S296	Calpain-15 (EC 3.4.22.-) (Small optic lobes homolog)	SOLH CAPN15	LLSGKRLSVLEEEAT	1.02	1.30039	0.0285692	0.378944	1.03239	1.16385	0.0459862	0.218904	9460000	5110000	9650000	3930000	19110000	9040000	7.28126	6.95617	37736	131828
O75815	1	Breast cancer anti-estrogen resistance protein 3 OS=Homo sapiens GN=BCAR3 PE=1 SV=1 - [BCAR3_HUMAN]	O75815	S290	Breast cancer anti-estrogen resistance protein 3 (Novel SH2-containing protein 2) (SH2 domain-containing protein 3B)	BCAR3 NSP2 SH2D3B UNQ271/PRO308	PDVAKRLSLTMGGVQ	0.883	1.26103	-0.179515	0.334607	0.893725	1.12863	-0.162098	0.174567	37400000	29900000	33000000	23700000	70400000	53600000	7.84757	7.72916	40503	60805	CAMK/MAPKAPK	MAPKAPK3
O75815	1	Breast cancer anti-estrogen resistance protein 3 OS=Homo sapiens GN=BCAR3 PE=1 SV=1 - [BCAR3_HUMAN]	O75815	S370	Breast cancer anti-estrogen resistance protein 3 (Novel SH2-containing protein 2) (SH2 domain-containing protein 3B)	BCAR3 NSP2 SH2D3B UNQ271/PRO308	SPVFRTGSEPALSPA	0.872	1.04058	-0.1976	0.0573917	0.882591	0.931322	-0.180183	-0.102649	5490000	14700000	4790000	14100000	10280000	28800000	7.01199	7.45939	20872	110046
O75815	1	Breast cancer anti-estrogen resistance protein 3 OS=Homo sapiens GN=BCAR3 PE=1 SV=1 - [BCAR3_HUMAN]	O75815	S375	Breast cancer anti-estrogen resistance protein 3 (Novel SH2-containing protein 2) (SH2 domain-containing protein 3B)	BCAR3 NSP2 SH2D3B UNQ271/PRO308	TGSEPALSPAVVRRV	0.827	0.820345	-0.274041	-0.285698	0.837045	0.734208	-0.256624	-0.445739	112000000	153000000	92300000	186000000	204300000	339000000	8.31027	8.5302	4749	116472	CAMK/MAPKAPK	MAPKAPK3
O75815	1	Breast cancer anti-estrogen resistance protein 3 OS=Homo sapiens GN=BCAR3 PE=1 SV=1 - [BCAR3_HUMAN]	O75815	S8	Breast cancer anti-estrogen resistance protein 3 (Novel SH2-containing protein 2) (SH2 domain-containing protein 3B)	BCAR3 NSP2 SH2D3B UNQ271/PRO308	MAAGKFASLPRNMPV	0.522	0.528821	-0.937878	-0.919149	0.52834	0.473295	-0.920461	-1.07919	44200000	32600000	23100000	61600000	67300000	94200000	7.82802	7.97405	4805	27544
O75815	1	Breast cancer anti-estrogen resistance protein 3 OS=Homo sapiens GN=BCAR3 PE=1 SV=1 - [BCAR3_HUMAN]	O75815	S83	Breast cancer anti-estrogen resistance protein 3 (Novel SH2-containing protein 2) (SH2 domain-containing protein 3B)	BCAR3 NSP2 SH2D3B UNQ271/PRO308	SKSPRQNSPVTQDGI	1.074	1.1274	0.102994	0.172994	1.08704	1.00902	0.120411	0.0129536	57400000	9130000	61600000	8090000	119000000	17220000	8.07555	7.23603	71581	110448	CAMK/MAPKAPK	MAPKAPK3
O75821	1	Eukaryotic translation initiation factor 3 subunit G OS=Homo sapiens GN=EIF3G PE=1 SV=2 - [EIF3G_HUMAN]	O75821	S42	Eukaryotic translation initiation factor 3 subunit G (eIF3g) (Eukaryotic translation initiation factor 3 RNA-binding subunit) (eIF-3 RNA-binding subunit) (Eukaryotic translation initiation factor 3 subunit 4) (eIF-3-delta) (eIF3 p42) (eIF3 p44)	EIF3G EIF3S4	PLATGDTSPEPELLP	1.006	1.05374	0.00863031	0.07552	1.01822	0.943098	0.0260474	-0.0845204	191000000	445000000	192000000	422000000	383000000	867000000	8.5832	8.93802	6688	30317
O75822	1	Eukaryotic translation initiation factor 3 subunit J OS=Homo sapiens GN=EIF3J PE=1 SV=2 - [EIF3J_HUMAN]	O75822	S127	Eukaryotic translation initiation factor 3 subunit J (eIF3j) (Eukaryotic translation initiation factor 3 subunit 1) (eIF-3-alpha) (eIF3 p35)	EIF3J EIF3S1 PRO0391	LKKLQEESDLELAKE	0.888	1.26103	-0.171368	0.334607	0.898785	1.12863	-0.153951	0.174567	25300000	14000000	22500000	11100000	47800000	25100000	7.67943	7.39967	36890	135316
O75822	1	Eukaryotic translation initiation factor 3 subunit J OS=Homo sapiens GN=EIF3J PE=1 SV=2 - [EIF3J_HUMAN]	O75822	T109	Eukaryotic translation initiation factor 3 subunit J (eIF3j) (Eukaryotic translation initiation factor 3 subunit 1) (eIF-3-alpha) (eIF3 p35)	EIF3J EIF3S1 PRO0391	PEEPKVLTPEEQLAD	0.78	1.04712	-0.358454	0.0664274	0.789474	0.937173	-0.341037	-0.0936131	18800000	51300000	14700000	49000000	33500000	100300000	7.52504	8.0013	45965	163249	Atypical/PIKK/FRAP	FRAP
O75864	1	Leucine-rich repeat-containing protein 68 OS=Homo sapiens GN=LRRC68 PE=2 SV=2 - [LRC68_HUMAN]	O75864	S556	Protein phosphatase 1 regulatory subunit 37 (Leucine-rich repeat-containing protein 68)	PPP1R37 KIAA1986 LRRC68	TEQRISVSSPGRGHK	0.916	0.951475	-0.12658	-0.0717627	0.927126	0.85157	-0.109163	-0.231803	70200000	72500000	64300000	76200000	134500000	148700000	8.12872	8.17231	104114	108781
O75864	1	Leucine-rich repeat-containing protein 68 OS=Homo sapiens GN=LRRC68 PE=2 SV=2 - [LRC68_HUMAN]	O75864	S557	Protein phosphatase 1 regulatory subunit 37 (Leucine-rich repeat-containing protein 68)	PPP1R37 KIAA1986 LRRC68	EQRISVSSPGRGHKV	0.669	0.766871	-0.579922	-0.382944	0.677126	0.68635	-0.562505	-0.542984	18100000	9460000	12100000	12300000	30200000	21760000	7.48001	7.33766	91497	168456
O75899	1	Gamma-aminobutyric acid type B receptor subunit 2 OS=Homo sapiens GN=GABBR2 PE=1 SV=1 - [GABR2_HUMAN]	O75899	T106	Gamma-aminobutyric acid type B receptor subunit 2 (GABA-B receptor 2) (GABA-B-R2) (GABA-BR2) (GABABR2) (Gb2) (G-protein coupled receptor 51) (HG20)	GABBR2 GPR51 GPRC3B	LDLRLYDTECDNAKG	1.043	1.14155	0.0607392	0.190997	1.05567	1.02169	0.0781562	0.0309568	139000000	146000000	145000000	128000000	284000000	274000000	8.45332	8.43775	32728	47056
O75899	1	Gamma-aminobutyric acid type B receptor subunit 2 OS=Homo sapiens GN=GABBR2 PE=1 SV=1 - [GABR2_HUMAN]	O75899	Y104	Gamma-aminobutyric acid type B receptor subunit 2 (GABA-B receptor 2) (GABA-B-R2) (GABA-BR2) (GABABR2) (Gb2) (G-protein coupled receptor 51) (HG20)	GABBR2 GPR51 GPRC3B	YFLDLRLYDTECDNA	1.043	1.14155	0.0607392	0.190997	1.05567	1.02169	0.0781562	0.0309568	139000000	146000000	145000000	128000000	284000000	274000000	8.45332	8.43775	32728	47056
O75909	1	Cyclin-K OS=Homo sapiens GN=CCNK PE=1 SV=1 - [CCNK_HUMAN]	O75909	S324	Cyclin-K	CCNK CPR4	AQQPKKPSPQPSSPR	0.927	1.0989	-0.109359	0.136062	0.938259	0.983516	-0.0919417	-0.0239789	20800000	57400000	19300000	52200000	40100000	109600000	7.60314	8.03981	81024	158441	CMGC/CDK/CDC2	CDK2
O75909	1	Cyclin-K OS=Homo sapiens GN=CCNK PE=1 SV=1 - [CCNK_HUMAN]	O75909	S340	Cyclin-K	CCNK CPR4	VKRAVVVSPKEENKA	1.022	1.11359	0.0313952	0.155213	1.03441	0.996659	0.0488122	-0.00482776	366000000	619000000	374000000	556000000	740000000	1175000000	8.86923	9.07004	49814	168211	CMGC/CDK/CDC2	CDK2
O75925	1	E3 SUMO-protein ligase PIAS1 OS=Homo sapiens GN=PIAS1 PE=1 SV=2 - [PIAS1_HUMAN]	O75925	S503	E3 SUMO-protein ligase PIAS1 (EC 6.3.2.-) (DEAD/H box-binding protein 1) (Gu-binding protein) (GBP) (Protein inhibitor of activated STAT protein 1) (RNA helicase II-binding protein)	PIAS1 DDXBP1	LSLPHQASPVSRTPS	0.993	1.15741	-0.0101344	0.210897	1.00506	1.03588	0.00728268	0.0508564	60700000	64500000	60300000	55700000	121000000	120200000	8.08279	8.0799	37745	55640
O75962	1	Triple functional domain protein OS=Homo sapiens GN=TRIO PE=1 SV=1 - [TRIO_HUMAN]	O75962	S1664	Triple functional domain protein (EC 2.7.11.1) (PTPRF-interacting protein)	TRIO	LCIAHSRSSMEMEGI	1.216	1.29032	0.282143	0.367732	1.23077	1.15484	0.29956	0.207691	18600000	82000000	22600000	63600000	41200000	145600000	7.6149	8.16316	37757	134775
O75962	1	Triple functional domain protein OS=Homo sapiens GN=TRIO PE=1 SV=1 - [TRIO_HUMAN]	O75962	S1665	Triple functional domain protein (EC 2.7.11.1) (PTPRF-interacting protein)	TRIO	CIAHSRSSMEMEGIF	1.058	1.20627	0.0813396	0.270556	1.07085	1.07961	0.0987567	0.110516	22300000	45300000	23600000	37600000	45900000	82900000	7.66181	7.91855	80368	54676
O75962	1	Triple functional domain protein OS=Homo sapiens GN=TRIO PE=1 SV=1 - [TRIO_HUMAN]	O75962	S1726	Triple functional domain protein (EC 2.7.11.1) (PTPRF-interacting protein)	TRIO	TSPVRRLSSGKADGH	0.968	0.983284	-0.046921	-0.0243197	0.979757	0.880039	-0.029504	-0.18436	10200000	11900000	9870000	12100000	20070000	24000000	7.30255	7.38021	59509	91390
O75962	1	Triple functional domain protein OS=Homo sapiens GN=TRIO PE=1 SV=1 - [TRIO_HUMAN]	O75962	S2367	Triple functional domain protein (EC 2.7.11.1) (PTPRF-interacting protein)	TRIO	RKGAANASGSSPDAP	1.027	1.42653	0.0384362	0.512514	1.03947	1.27675	0.0558532	0.352473	21700000	3340000	22300000	2340000	44000000	5680000	7.64345	6.75435	7287	107902
O75962	1	Triple functional domain protein OS=Homo sapiens GN=TRIO PE=1 SV=1 - [TRIO_HUMAN]	O75962	S2370	Triple functional domain protein (EC 2.7.11.1) (PTPRF-interacting protein)	TRIO	AANASGSSPDAPAKD	0.535	0.999001	-0.902389	-0.00144197	0.541498	0.894106	-0.884972	-0.161482	11000000	5240000	5870000	5240000	16870000	10480000	7.22712	7.02036	39052	108125
O75970	1	Multiple PDZ domain protein OS=Homo sapiens GN=MPDZ PE=1 SV=1 - [MPDZ_HUMAN]	O75970	S1595	Multiple PDZ domain protein (Multi-PDZ domain protein 1)	MPDZ MUPP1	LMVPQSGSPEPESIR	1.014	1.02564	0.0200577	0.0365259	1.02632	0.917949	0.0374747	-0.123515	64700000	22900000	65600000	22300000	130300000	45200000	8.11494	7.65514	40475	60605
O75970	1	Multiple PDZ domain protein OS=Homo sapiens GN=MPDZ PE=1 SV=1 - [MPDZ_HUMAN]	O75970	S230	Multiple PDZ domain protein (Multi-PDZ domain protein 1)	MPDZ MUPP1	GSLPQLVSPIVSRSP	0.855	0.952381	-0.226004	-0.0703893	0.865385	0.852381	-0.208587	-0.23043	1850000	43800000	1580000	45900000	3430000	89700000	6.53529	7.95279	107442	120068
O75970	1	Multiple PDZ domain protein OS=Homo sapiens GN=MPDZ PE=1 SV=1 - [MPDZ_HUMAN]	O75970	S354	Multiple PDZ domain protein (Multi-PDZ domain protein 1)	MPDZ MUPP1	LGITLSSSPTSTPEL	1.062	1.24069	0.0867838	0.311148	1.0749	1.11042	0.104201	0.151108	69500000	60100000	73800000	48500000	143300000	108600000	8.15625	8.03583	6609	30054
O75970	1	Multiple PDZ domain protein OS=Homo sapiens GN=MPDZ PE=1 SV=1 - [MPDZ_HUMAN]	O75970	S483	Multiple PDZ domain protein (Multi-PDZ domain protein 1)	MPDZ MUPP1	VTKDADLSPVNASII	1.049	1.21507	0.0690147	0.281036	1.06174	1.08748	0.0864317	0.120995	2990000	7540000	3140000	6200000	6130000	13740000	6.78746	7.13799	67982	19740
O75976	1	Carboxypeptidase D OS=Homo sapiens GN=CPD PE=1 SV=2 - [CBPD_HUMAN]	O75976	T1368	Carboxypeptidase D (EC 3.4.17.22) (Metallocarboxypeptidase D) (gp180)	CPD	SHEFQDETDTEEETL	0.891	1.20048	-0.166503	0.263612	0.901822	1.07443	-0.149086	0.103571	35400000	36800000	31600000	30700000	67000000	67500000	7.82607	7.8293	86073	64132	Other/CK2	CK2a2
O75976	1	Carboxypeptidase D OS=Homo sapiens GN=CPD PE=1 SV=2 - [CBPD_HUMAN]	O75976	T1370	Carboxypeptidase D (EC 3.4.17.22) (Metallocarboxypeptidase D) (gp180)	CPD	EFQDETDTEEETLYS	0.239	1.21359	-2.06492	0.279284	0.241903	1.08617	-2.0475	0.119243	2110000	104000000	504000	85300000	2614000	189300000	6.41731	8.27715	83709	146180	Other/CK2	CK2a2
O76021	1	Ribosomal L1 domain-containing protein 1 OS=Homo sapiens GN=RSL1D1 PE=1 SV=3 - [RL1D1_HUMAN]	O76021	S361	Ribosomal L1 domain-containing protein 1 (CATX-11) (Cellular senescence-inhibited gene protein) (Protein PBK1)	RSL1D1 CATX11 CSIG PBK1 L12	QVKATNESEDEIPQL	0.987	1.14286	-0.018878	0.192645	0.998988	1.02286	-0.00146096	0.0326047	549000000	806000000	542000000	705000000	1091000000	1511000000	9.03782	9.17926	26562	15785
O76024	1	Wolframin OS=Homo sapiens GN=WFS1 PE=1 SV=1 - [WFS1_HUMAN]	O76024	S32	Wolframin	WFS1	SRLNATASLEQERSE	3.214	1.64204	1.68437	0.715486	3.25304	1.46962	1.70179	0.555445	2390000	11200000	7680000	6830000	10070000	18030000	7.00303	7.256	92021	23102	AGC/PKC	PKCe
O76064	1	E3 ubiquitin-protein ligase RNF8 OS=Homo sapiens GN=RNF8 PE=1 SV=1 - [RNF8_HUMAN]	O76064	S157	E3 ubiquitin-protein ligase RNF8 (EC 6.3.2.-) (RING finger protein 8)	RNF8 KIAA0646	LRTKRKFSLDELAGP	1.127	2.21239	0.172488	1.14561	1.14069	1.98009	0.189905	0.985565	1140000	14900000	1280000	6730000	2420000	21630000	6.38382	7.33506	90724	74173	AGC	LATS1
O94759	1	Transient receptor potential cation channel subfamily M member 2 OS=Homo sapiens GN=TRPM2 PE=1 SV=2 - [TRPM2_HUMAN]	O94759	S82	Transient receptor potential cation channel subfamily M member 2 (EC 3.6.1.13) (Estrogen-responsive element-associated gene 1 protein) (Long transient receptor potential channel 2) (LTrpC-2) (LTrpC2) (Transient receptor potential channel 7) (TrpC7)	TRPM2 EREG1 KNP3 LTRPC2 TRPC7	FVESSKLSDAGKVVC	0.967	1.01833	-0.0484122	0.0262051	0.978745	0.911405	-0.0309952	-0.133835	54700000	18800000	53000000	18400000	107700000	37200000	8.03222	7.57054	5221	23928
O94804	1	Serine/threonine-protein kinase 10 OS=Homo sapiens GN=STK10 PE=1 SV=1 - [STK10_HUMAN]	O94804	S438	Serine/threonine-protein kinase 10 (EC 2.7.11.1) (Lymphocyte-oriented kinase)	STK10 LOK	AEQGGDLSPAANRSQ	0.959	1.01523	-0.0603973	0.0218044	0.970648	0.908629	-0.0429802	-0.138236	1540000000	789000000	1470000000	776000000	3010000000	1565000000	9.47857	9.19451	3454	113499	STE/STE11	MAP3K1
O94804	1	Serine/threonine-protein kinase 10 OS=Homo sapiens GN=STK10 PE=1 SV=1 - [STK10_HUMAN]	O94804	S448	Serine/threonine-protein kinase 10 (EC 2.7.11.1) (Lymphocyte-oriented kinase)	STK10 LOK	ANRSQKASQSRPNSS	0.998	1.11607	-0.00288828	0.158429	1.01012	0.998884	0.0145288	-0.00161105	409000000	3690000	408000000	3300000	817000000	6990000	8.91222	6.84448	105697	157313	Atypical/PIKK/ATM	ATM
O94804	1	Serine/threonine-protein kinase 10 OS=Homo sapiens GN=STK10 PE=1 SV=1 - [STK10_HUMAN]	O94804	S450	Serine/threonine-protein kinase 10 (EC 2.7.11.1) (Lymphocyte-oriented kinase)	STK10 LOK	RSQKASQSRPNSSAL	1.015	1.1976	0.0214797	0.260152	1.02733	1.07186	0.0388968	0.100111	62600000	55400000	63500000	46300000	126100000	101700000	8.10072	8.00732	37103	52043	Other/PLK	PLK1
O94804	1	Serine/threonine-protein kinase 10 OS=Homo sapiens GN=STK10 PE=1 SV=1 - [STK10_HUMAN]	O94804	S454	Serine/threonine-protein kinase 10 (EC 2.7.11.1) (Lymphocyte-oriented kinase)	STK10 LOK	ASQSRPNSSALETLG	1.238	1.49031	0.308011	0.575615	1.25304	1.33383	0.325428	0.415575	250000000	259000000	310000000	174000000	560000000	433000000	8.74819	8.63649	37066	51781	STE/STE20	LOK
O94804	1	Serine/threonine-protein kinase 10 OS=Homo sapiens GN=STK10 PE=1 SV=1 - [STK10_HUMAN]	O94804	S514	Serine/threonine-protein kinase 10 (EC 2.7.11.1) (Lymphocyte-oriented kinase)	STK10 LOK	SLNKEMGSLSIKDPK	0.388	0.420875	-1.36587	-1.24853	0.392713	0.376684	-1.34845	-1.40858	11800000	12700000	4600000	30100000	16400000	42800000	7.21484	7.63144	79138	134332
O94804	1	Serine/threonine-protein kinase 10 OS=Homo sapiens GN=STK10 PE=1 SV=1 - [STK10_HUMAN]	O94804	T952	Serine/threonine-protein kinase 10 (EC 2.7.11.1) (Lymphocyte-oriented kinase)	STK10 LOK	AECPNPSTPSKAAKF	1.157	1.30719	0.210389	0.386468	1.17105	1.16993	0.227806	0.226428	183000000	65900000	212000000	50400000	395000000	116300000	8.5966	8.06558	3715	26052	Other/PLK	PLK1
O94806	1	Serine/threonine-protein kinase D3 OS=Homo sapiens GN=PRKD3 PE=1 SV=1 - [KPCD3_HUMAN]	O94806	S252	Serine/threonine-protein kinase D3 (EC 2.7.11.13) (Protein kinase C nu type) (Protein kinase EPK2) (nPKC-nu)	PRKD3 EPK2 PRKCN	EPSKRIPSWSGRPIW	0.764	1.42248	-0.388355	0.508403	0.773279	1.27312	-0.370938	0.348363	1350000	1790000	1030000	1260000	2380000	3050000	6.37658	6.4843	51827	80030
O94806	1	Serine/threonine-protein kinase D3 OS=Homo sapiens GN=PRKD3 PE=1 SV=1 - [KPCD3_HUMAN]	O94806	S41	Serine/threonine-protein kinase D3 (EC 2.7.11.13) (Protein kinase C nu type) (Protein kinase EPK2) (nPKC-nu)	PRKD3 EPK2 PRKCN	TGLSARLSNGSFSAP	0.909	1.49477	-0.137648	0.579922	0.92004	1.33782	-0.120231	0.419881	3020000	1550000	2740000	1030000	5760000	2580000	6.76042	6.41162	12133	101181
O94806	1	Serine/threonine-protein kinase D3 OS=Homo sapiens GN=PRKD3 PE=1 SV=1 - [KPCD3_HUMAN]	O94806	T535	Serine/threonine-protein kinase D3 (EC 2.7.11.13) (Protein kinase C nu type) (Protein kinase EPK2) (nPKC-nu)	PRKD3 EPK2 PRKCN	RQALMPVTPQASVCT	0.107	0.998004	-3.22432	-0.00288251	0.1083	0.893214	-3.2069	-0.162923	955000	31200000	102000	31200000	1057000	62400000	6.02407	7.79518	10153	27260	Atypical/PIKK/FRAP	FRAP
O94808	1	Glucosamine--fructose-6-phosphate aminotransferase [isomerizing] 2 OS=Homo sapiens GN=GFPT2 PE=1 SV=3 - [GFPT2_HUMAN]	O94808	S244	Glucosamine--fructose-6-phosphate aminotransferase [isomerizing] 2 (EC 2.6.1.16) (D-fructose-6-phosphate amidotransferase 2) (Glutamine:fructose 6 phosphate amidotransferase 2) (GFAT 2) (GFAT2) (Hexosephosphate aminotransferase 2)	GFPT2	TRMKRLDSSACLHAV	1.057	1.17096	0.0799754	0.227692	1.06984	1.04801	0.0973924	0.0676516	136000000	141000000	144000000	121000000	280000000	262000000	8.44716	8.4183	48024	73217
O94826	1	Mitochondrial import receptor subunit TOM70 OS=Homo sapiens GN=TOMM70A PE=1 SV=1 - [TOM70_HUMAN]	O94826	S91	Mitochondrial import receptor subunit TOM70 (Mitochondrial precursor proteins import receptor) (Translocase of outer membrane 70 kDa subunit)	TOMM70A KIAA0719 TOM70	KTPEGRASPAPGSGH	1.091	1.60514	0.125651	0.682696	1.10425	1.4366	0.143068	0.522656	182000000	128000000	198000000	79500000	380000000	207500000	8.57978	8.31702	43310	91840
O94827	1	Pleckstrin homology domain-containing family G member 5 OS=Homo sapiens GN=PLEKHG5 PE=2 SV=3 - [PKHG5_HUMAN]	O94827	S249	Pleckstrin homology domain-containing family G member 5 (PH domain-containing family G member 5) (Guanine nucleotide exchange factor 720) (GEF720)	PLEKHG5 KIAA0720	DAQSRRESLDILAPG	1.551	2.12314	0.633199	1.0862	1.56984	1.90021	0.650616	0.926161	2720000	7900000	4220000	3720000	6940000	11620000	6.84136	7.06521	51393	79425	Other/AUR/AUR-B	AurB
O94827	1	Pleckstrin homology domain-containing family G member 5 OS=Homo sapiens GN=PLEKHG5 PE=2 SV=3 - [PKHG5_HUMAN]	O94827	S907	Pleckstrin homology domain-containing family G member 5 (PH domain-containing family G member 5) (Guanine nucleotide exchange factor 720) (GEF720)	PLEKHG5 KIAA0720	PESPRVPSPPPSPRL	0.925	1.03734	-0.112475	0.0528949	0.936235	0.928423	-0.0950577	-0.107145	29800000	11800000	27600000	11400000	57400000	23200000	7.75891	7.36549	13291	31612
O94827	1	Pleckstrin homology domain-containing family G member 5 OS=Homo sapiens GN=PLEKHG5 PE=2 SV=3 - [PKHG5_HUMAN]	O94827	S911	Pleckstrin homology domain-containing family G member 5 (PH domain-containing family G member 5) (Guanine nucleotide exchange factor 720) (GEF720)	PLEKHG5 KIAA0720	RVPSPPPSPRLRRRT	0.925	1.03734	-0.112475	0.0528949	0.936235	0.928423	-0.0950577	-0.107145	29800000	11800000	27600000	11400000	57400000	23200000	7.75891	7.36549	13291	31612
O94827	1	Pleckstrin homology domain-containing family G member 5 OS=Homo sapiens GN=PLEKHG5 PE=2 SV=3 - [PKHG5_HUMAN]	O94827	S957	Pleckstrin homology domain-containing family G member 5 (PH domain-containing family G member 5) (Guanine nucleotide exchange factor 720) (GEF720)	PLEKHG5 KIAA0720	TPSAPSRSLSELCLA	1.053	1.14943	0.0745054	0.200913	1.06579	1.02874	0.0919225	0.0408723	8930000	16400000	9400000	14300000	18330000	30700000	7.26316	7.48714	26634	101940
O94827	1	Pleckstrin homology domain-containing family G member 5 OS=Homo sapiens GN=PLEKHG5 PE=2 SV=3 - [PKHG5_HUMAN]	O94827	S959	Pleckstrin homology domain-containing family G member 5 (PH domain-containing family G member 5) (Guanine nucleotide exchange factor 720) (GEF720)	PLEKHG5 KIAA0720	SAPSRSLSELCLAVP	1.053	1.02564	0.0745054	0.0365259	1.06579	0.917949	0.0919225	-0.123515	8930000	21500000	9400000	21000000	18330000	42500000	7.26316	7.62839	26634	21271
O94833	1	Bullous pemphigoid antigen 1, isoforms 6/9/10 OS=Homo sapiens GN=DST PE=1 SV=3 - [BPAEA_HUMAN]	O94833	S1556	Replaced by: Q03001 = Dystonin (230 kDa bullous pemphigoid antigen) (230/240 kDa bullous pemphigoid antigen) (Bullous pemphigoid antigen 1) (BPA) (Bullous pemphigoid antigen) (Dystonia musculorum protein) (Hemidesmosomal plaque protein)	DST BP230 BP240 BPAG1 DMH DT KIAA0728	TKLKRQKSFSEDVIS	0.75	1.0929	-0.415037	0.128156	0.759109	0.978142	-0.39762	-0.0318841	22800000	26200000	17100000	24000000	39900000	50200000	7.60097	7.7007	48825	135290
O94833	1	Bullous pemphigoid antigen 1, isoforms 6/9/10 OS=Homo sapiens GN=DST PE=1 SV=3 - [BPAEA_HUMAN]	O94833	S4984	Replaced by: Q03001 = Dystonin (230 kDa bullous pemphigoid antigen) (230/240 kDa bullous pemphigoid antigen) (Bullous pemphigoid antigen 1) (BPA) (Bullous pemphigoid antigen) (Dystonia musculorum protein) (Hemidesmosomal plaque protein)	DST BP230 BP240 BPAG1 DMH DT KIAA0728	RGASPNRSTSVSSQA	1.062	1.41243	0.0867838	0.498179	1.0749	1.26412	0.104201	0.338138	27000000	19700000	28700000	14000000	55700000	33700000	7.74586	7.52763	66919	13770
O94833	1	Bullous pemphigoid antigen 1, isoforms 6/9/10 OS=Homo sapiens GN=DST PE=1 SV=3 - [BPAEA_HUMAN]	O94833	S4986	Replaced by: Q03001 = Dystonin (230 kDa bullous pemphigoid antigen) (230/240 kDa bullous pemphigoid antigen) (Bullous pemphigoid antigen 1) (BPA) (Bullous pemphigoid antigen) (Dystonia musculorum protein) (Hemidesmosomal plaque protein)	DST BP230 BP240 BPAG1 DMH DT KIAA0728	ASPNRSTSVSSQAAQ	1.062	1.41243	0.0867838	0.498179	1.0749	1.26412	0.104201	0.338138	27000000	19700000	28700000	14000000	55700000	33700000	7.74586	7.52763	66919	13770
O94854	1	Uncharacterized protein KIAA0754 OS=Homo sapiens GN=KIAA0754 PE=1 SV=3 - [K0754_HUMAN]	O94854	S666	Uncharacterized protein KIAA0754	KIAA0754	GEMERRDSDSFLNIF	1.27	1.38313	0.344828	0.467932	1.28543	1.2379	0.362246	0.307892	2620000	4940000	3330000	3580000	5950000	8520000	6.77452	6.93044	80965	136262
O94854	1	Uncharacterized protein KIAA0754 OS=Homo sapiens GN=KIAA0754 PE=1 SV=3 - [K0754_HUMAN]	O94854	T122	Uncharacterized protein KIAA0754	KIAA0754	ESRFSSATWPRATKS	0.738	0.786164	-0.438307	-0.347099	0.746964	0.703616	-0.42089	-0.507139	18100000	55700000	13400000	70900000	31500000	126600000	7.49831	8.10243	71128	110425
O94855	1	Protein transport protein Sec24D OS=Homo sapiens GN=SEC24D PE=2 SV=1 - [SC24D_HUMAN]	O94855	S266	Protein transport protein Sec24D (SEC24-related protein D)	SEC24D KIAA0755	LDPDSIPSPIQVIEN	1.006	1.1655	0.00863031	0.22095	1.01822	1.04312	0.0260474	0.06091	3150000	6750000	3170000	5780000	6320000	12530000	6.80072	7.09795	80738	56494
O94868	1	FCH and double SH3 domains protein 2 OS=Homo sapiens GN=FCHSD2 PE=1 SV=3 - [FCSD2_HUMAN]	O94868	S681	FCH and double SH3 domains protein 2 (Carom) (SH3 multiple domains protein 3)	FCHSD2 KIAA0769 SH3MD3	SSLYFPRSPSANEKS	0.846	1.02041	-0.24127	0.0291463	0.856275	0.913265	-0.223853	-0.130894	43700000	21800000	37000000	21400000	80700000	43200000	7.90687	7.63548	37181	52132
O94875	1	Sorbin and SH3 domain-containing protein 2 OS=Homo sapiens GN=SORBS2 PE=1 SV=3 - [SRBS2_HUMAN]	O94875	S278	Sorbin and SH3 domain-containing protein 2 (Arg/Abl-interacting protein 2) (ArgBP2) (Sorbin)	SORBS2 ARGBP2 KIAA0777	DQSASRTSPGRVDLP	1.062	1.14943	0.0867838	0.200913	1.0749	1.02874	0.104201	0.0408723	142000000	180000000	151000000	157000000	293000000	337000000	8.46687	8.52763	33686	48434	CMGC/MAPK	Erk2
O94875	1	Sorbin and SH3 domain-containing protein 2 OS=Homo sapiens GN=SORBS2 PE=1 SV=3 - [SRBS2_HUMAN]	O94875	S298	Sorbin and SH3 domain-containing protein 2 (Arg/Abl-interacting protein 2) (ArgBP2) (Sorbin)	SORBS2 ARGBP2 KIAA0777	LTKSFTSSSPSSPSR	0.904	0.992063	-0.145605	-0.0114956	0.91498	0.887897	-0.128188	-0.171536	2100000	16300000	1900000	16400000	4000000	32700000	6.60206	7.51455	20528	96602	CMGC/GSK	GSK3A
O94875	1	Sorbin and SH3 domain-containing protein 2 OS=Homo sapiens GN=SORBS2 PE=1 SV=3 - [SRBS2_HUMAN]	O94875	S302	Sorbin and SH3 domain-containing protein 2 (Arg/Abl-interacting protein 2) (ArgBP2) (Sorbin)	SORBS2 ARGBP2 KIAA0777	FTSSSPSSPSRAKGG	0.904	0.992063	-0.145605	-0.0114956	0.91498	0.887897	-0.128188	-0.171536	2100000	16300000	1900000	16400000	4000000	32700000	6.60206	7.51455	20528	96602	CMGC/GSK	GSK3A
O94876	1	Transmembrane and coiled-coil domains protein 1 OS=Homo sapiens GN=TMCC1 PE=1 SV=2 - [TMCC1_HUMAN]	O94876	S382	Transmembrane and coiled-coil domains protein 1	TMCC1 KIAA0779	LIRNKFGSADNIPNL	0.944	1.18765	-0.0831412	0.248108	0.955466	1.06295	-0.0657242	0.0880674	22400000	30100000	21200000	25400000	43600000	55500000	7.63949	7.74429	41136	28888
O94880	1	PHD finger protein 14 OS=Homo sapiens GN=PHF14 PE=1 SV=1 - [PHF14_HUMAN]	O94880	S290	PHD finger protein 14	PHF14 KIAA0783	DEELTNDSLTLSQSK	0.955	1.10011	-0.0664274	0.137648	0.966599	0.984598	-0.0490103	-0.0223926	1540000	26100000	1470000	23700000	3010000	49800000	6.47857	7.69723	21712	98085
O94880	1	PHD finger protein 14 OS=Homo sapiens GN=PHF14 PE=1 SV=1 - [PHF14_HUMAN]	O94880	S302	PHD finger protein 14	PHF14 KIAA0783	QSKSNEDSLILEKSQ	0.936	1.96464	-0.0954196	0.974262	0.947368	1.75835	-0.0780025	0.814222	3120000	14600000	2920000	7460000	6040000	22060000	6.78104	7.34361	11770	28262
O94880	1	PHD finger protein 14 OS=Homo sapiens GN=PHF14 PE=1 SV=1 - [PHF14_HUMAN]	O94880	T287	PHD finger protein 14	PHF14 KIAA0783	SADDEELTNDSLTLS	1.201	1.10011	0.264236	0.137648	1.21559	0.984598	0.281653	-0.0223926	28200000	26100000	33800000	23700000	62000000	49800000	7.79239	7.69723	5397	98085
O94885	1	SAM and SH3 domain-containing protein 1 OS=Homo sapiens GN=SASH1 PE=1 SV=3 - [SASH1_HUMAN]	O94885	S137	SAM and SH3 domain-containing protein 1 (Proline-glutamate repeat-containing protein)	SASH1 KIAA0790 PEPE1	NPLHKSNSEDSSVGK	1.377	1.95312	0.461529	0.965784	1.39372	1.74805	0.478946	0.805744	9720000	10700000	13400000	5450000	23120000	16150000	7.36399	7.20817	78194	72797
O94885	1	SAM and SH3 domain-containing protein 1 OS=Homo sapiens GN=SASH1 PE=1 SV=3 - [SASH1_HUMAN]	O94885	S387	SAM and SH3 domain-containing protein 1 (Proline-glutamate repeat-containing protein)	SASH1 KIAA0790 PEPE1	KAQKVSRSLTEGEMK	1.084	1.7452	0.116365	0.803393	1.09717	1.56195	0.133782	0.643353	31900000	61600000	34600000	35300000	66500000	96900000	7.82282	7.98632	47341	72365
O94885	1	SAM and SH3 domain-containing protein 1 OS=Homo sapiens GN=SASH1 PE=1 SV=3 - [SASH1_HUMAN]	O94885	S407	SAM and SH3 domain-containing protein 1 (Proline-glutamate repeat-containing protein)	SASH1 KIAA0790 PEPE1	LSHGRTCSFGGFDLT	0.951	1.0582	-0.0724828	0.0816138	0.962551	0.94709	-0.0550657	-0.0784266	375000000	182000000	356000000	172000000	731000000	354000000	8.86392	8.549	6323	29655
O94885	1	SAM and SH3 domain-containing protein 1 OS=Homo sapiens GN=SASH1 PE=1 SV=3 - [SASH1_HUMAN]	O94885	S442	SAM and SH3 domain-containing protein 1 (Proline-glutamate repeat-containing protein)	SASH1 KIAA0790 PEPE1	VYKEVIKSPTASRIS	0.784	0.899281	-0.351074	-0.153157	0.793522	0.804856	-0.333657	-0.313197	299000000	375000000	235000000	417000000	534000000	792000000	8.72754	8.89873	35197	133484
O94885	1	SAM and SH3 domain-containing protein 1 OS=Homo sapiens GN=SASH1 PE=1 SV=3 - [SASH1_HUMAN]	O94885	S490	SAM and SH3 domain-containing protein 1 (Proline-glutamate repeat-containing protein)	SASH1 KIAA0790 PEPE1	MPGSPPPSQPDPEHL	0.868	1.2837	-0.204233	0.360305	0.878543	1.14891	-0.186816	0.200264	18800000	22600000	16300000	17600000	35100000	40200000	7.54531	7.60423	92632	81686
O94885	1	SAM and SH3 domain-containing protein 1 OS=Homo sapiens GN=SASH1 PE=1 SV=3 - [SASH1_HUMAN]	O94885	S507	SAM and SH3 domain-containing protein 1 (Proline-glutamate repeat-containing protein)	SASH1 KIAA0790 PEPE1	PKLKAGGSVESLRSS	1.085	1.08814	0.117695	0.121863	1.09818	0.973885	0.135112	-0.0381772	88000000	77200000	95500000	71000000	183500000	148200000	8.26364	8.17085	3578	26256
O94885	1	SAM and SH3 domain-containing protein 1 OS=Homo sapiens GN=SASH1 PE=1 SV=3 - [SASH1_HUMAN]	O94885	S614	SAM and SH3 domain-containing protein 1 (Proline-glutamate repeat-containing protein)	SASH1 KIAA0790 PEPE1	FIYVDVLSEDEEKPK	0.815	1.52905	-0.295128	0.612637	0.824899	1.3685	-0.277711	0.452597	16500000	17500000	13500000	11500000	30000000	29000000	7.47712	7.4624	76953	126308
O94885	1	SAM and SH3 domain-containing protein 1 OS=Homo sapiens GN=SASH1 PE=1 SV=3 - [SASH1_HUMAN]	O94885	S721	SAM and SH3 domain-containing protein 1 (Proline-glutamate repeat-containing protein)	SASH1 KIAA0790 PEPE1	SQGLSGCSPRDSGCY	1.091	1.1325	0.125651	0.179515	1.10425	1.01359	0.143068	0.0194742	282000000	87300000	308000000	77100000	590000000	164400000	8.77085	8.2159	5183	24126
O94885	1	SAM and SH3 domain-containing protein 1 OS=Homo sapiens GN=SASH1 PE=1 SV=3 - [SASH1_HUMAN]	O94885	S730	SAM and SH3 domain-containing protein 1 (Proline-glutamate repeat-containing protein)	SASH1 KIAA0790 PEPE1	RDSGCYESSENLENG	1.152	1.3587	0.204141	0.442222	1.16599	1.21603	0.221558	0.282182	10700000	8390000	12300000	6180000	23000000	14570000	7.36173	7.16346	66302	13136
O94885	1	SAM and SH3 domain-containing protein 1 OS=Homo sapiens GN=SASH1 PE=1 SV=3 - [SASH1_HUMAN]	O94885	S743	SAM and SH3 domain-containing protein 1 (Proline-glutamate repeat-containing protein)	SASH1 KIAA0790 PEPE1	NGKTRKASLLSAKSS	2.047	2.35849	1.03351	1.23786	2.07186	2.11085	1.05093	1.07782	2860000	19000000	5850000	8060000	8710000	27060000	6.94002	7.43233	39996	59874
O94885	1	SAM and SH3 domain-containing protein 1 OS=Homo sapiens GN=SASH1 PE=1 SV=3 - [SASH1_HUMAN]	O94885	S813	SAM and SH3 domain-containing protein 1 (Proline-glutamate repeat-containing protein)	SASH1 KIAA0790 PEPE1	GLNKNRRSLPVSICR	1.096	1.16686	0.132248	0.222633	1.10931	1.04434	0.149665	0.0625925	827000000	512000000	907000000	439000000	1734000000	951000000	9.23905	8.97818	5289	28343	AGC/PKC	PKCz
O94885	1	SAM and SH3 domain-containing protein 1 OS=Homo sapiens GN=SASH1 PE=1 SV=3 - [SASH1_HUMAN]	O94885	S821	SAM and SH3 domain-containing protein 1 (Proline-glutamate repeat-containing protein)	SASH1 KIAA0790 PEPE1	LPVSICRSCETLEGP	1.32	1.30039	0.400538	0.378944	1.33603	1.16385	0.417955	0.218904	13100000	22200000	17300000	17100000	30400000	39300000	7.48287	7.59439	68468	15412
O94885	1	SAM and SH3 domain-containing protein 1 OS=Homo sapiens GN=SASH1 PE=1 SV=3 - [SASH1_HUMAN]	O94885	S90	SAM and SH3 domain-containing protein 1 (Proline-glutamate repeat-containing protein)	SASH1 KIAA0790 PEPE1	ELRKRRVSQDLEVEK	0.872	2.12314	-0.1976	1.0862	0.882591	1.90021	-0.180183	0.926161	13600000	5390000	11900000	2540000	25500000	7930000	7.40654	6.89927	57473	64008	AGC/PKC	PKCz
O94885	1	SAM and SH3 domain-containing protein 1 OS=Homo sapiens GN=SASH1 PE=1 SV=3 - [SASH1_HUMAN]	O94885	S923	SAM and SH3 domain-containing protein 1 (Proline-glutamate repeat-containing protein)	SASH1 KIAA0790 PEPE1	AASGRGLSPPQCLPR	1.028	0.50226	0.0398403	-0.993493	1.04049	0.449523	0.0572573	-1.15353	40700000	19600000	41900000	39100000	82600000	58700000	7.91698	7.76864	5166	28218
O94885	1	SAM and SH3 domain-containing protein 1 OS=Homo sapiens GN=SASH1 PE=1 SV=3 - [SASH1_HUMAN]	O94885	T405	SAM and SH3 domain-containing protein 1 (Proline-glutamate repeat-containing protein)	SASH1 KIAA0790 PEPE1	GSLSHGRTCSFGGFD	0.951	1.05708	-0.0724828	0.0800879	0.962551	0.946089	-0.0550657	-0.0799525	375000000	1770000	356000000	1670000	731000000	3440000	8.86392	6.53656	6323	122873
O94888	1	UBX domain-containing protein 7 OS=Homo sapiens GN=UBXD7 PE=1 SV=2 - [UBXD7_HUMAN]	O94888	S288	UBX domain-containing protein 7	UBXN7 KIAA0794 UBXD7	LIDASEDSQLEAAIR	0.939	1.33156	-0.0908029	0.413115	0.950405	1.19174	-0.0733859	0.253075	309000000	129000000	290000000	97000000	599000000	226000000	8.77743	8.35411	6602	30045
O94903	1	Proline synthetase co-transcribed bacterial homolog protein OS=Homo sapiens GN=PROSC PE=1 SV=1 - [PROSC_HUMAN]	O94903	S244	Proline synthase co-transcribed bacterial homolog protein	PROSC	STNVRIGSTIFGERD	1.337	1.42248	0.418999	0.508403	1.35324	1.27312	0.436417	0.348363	22200000	12200000	29700000	8560000	51900000	20760000	7.71517	7.31723	5697	118857
O94906	1	Pre-mRNA-processing factor 6 OS=Homo sapiens GN=PRPF6 PE=1 SV=1 - [PRP6_HUMAN]	O94906	T266	Pre-mRNA-processing factor 6 (Androgen receptor N-terminal domain-transactivating protein 1) (ANT-1) (PRP6 homolog) (U5 snRNP-associated 102 kDa protein) (U5-102 kDa protein)	PRPF6 C20orf14	SDSVSGQTVVDPKGY	0.945	1.02145	-0.0816138	0.0306192	0.956478	0.914198	-0.0641967	-0.129421	15100000	23200000	14200000	22700000	29300000	45900000	7.46687	7.66181	105164	115886
O94909	1	Uncharacterized protein KIAA0819 OS=Homo sapiens GN=KIAA0819 PE=1 SV=2 - [K0819_HUMAN]	O94909	S789	Replaced by: Q7RTP6 = Protein-methionine sulfoxide oxidase MICAL3 (EC 1.14.13.-) (Molecule interacting with CasL protein 3) (MICAL-3)	MICAL3 KIAA0819 KIAA1364	GKERRPDSPTRPTLR	0.809	1.85529	-0.305788	0.891643	0.818826	1.66048	-0.288371	0.731602	29900000	37900000	24200000	20400000	54100000	58300000	7.7332	7.76567	60438	93342
O94913	1	Pre-mRNA cleavage complex 2 protein Pcf11 OS=Homo sapiens GN=PCF11 PE=1 SV=3 - [PCF11_HUMAN]	O94913	S489	Pre-mRNA cleavage complex 2 protein Pcf11 (Pre-mRNA cleavage complex II protein Pcf11)	PCF11 KIAA0824	SRSPKSRSPIIHSPK	0.962	1.31926	-0.0558912	0.39973	0.973684	1.18074	-0.0384741	0.23969	127000000	83600000	122000000	63400000	249000000	147000000	8.3962	8.16732	42331	141326	CMGC/CDK	CDK9
O94913	1	Pre-mRNA cleavage complex 2 protein Pcf11 OS=Homo sapiens GN=PCF11 PE=1 SV=3 - [PCF11_HUMAN]	O94913	S494	Pre-mRNA cleavage complex 2 protein Pcf11 (Pre-mRNA cleavage complex II protein Pcf11)	PCF11 KIAA0824	SRSPIIHSPKRRDRR	0.801	1.75131	-0.320126	0.808437	0.810729	1.56743	-0.302709	0.648397	6340000	11200000	5080000	6380000	11420000	17580000	7.05767	7.24502	54618	159155	CMGC/CDK	CDK9
Q96G01;O94913	2	Protein bicaudal D homolog 1 OS=Homo sapiens GN=BICD1 PE=1 SV=2 - [BICD1_HUMAN]|Pre-mRNA cleavage complex 2 protein Pcf11 OS=Homo sapiens GN=PCF11 PE=1 SV=3 - [PCF11_HUMAN]	O94913	S633	Pre-mRNA cleavage complex 2 protein Pcf11 (Pre-mRNA cleavage complex II protein Pcf11)	PCF11 KIAA0824	SSTKGILSPRAPKQQ	0.816	0.909091	-0.293359	-0.137504	0.825911	0.813636	-0.275942	-0.297544	86600000	81800000	70600000	89900000	157200000	171700000	8.19645	8.23477	4698	27327
O94913	1	Pre-mRNA cleavage complex 2 protein Pcf11 OS=Homo sapiens GN=PCF11 PE=1 SV=3 - [PCF11_HUMAN]	O94913	S705	Pre-mRNA cleavage complex 2 protein Pcf11 (Pre-mRNA cleavage complex II protein Pcf11)	PCF11 KIAA0824	GVREEQRSPFNDRFP	1.131	1.14025	0.177599	0.189351	1.14474	1.02052	0.195016	0.0293108	38200000	37000000	43200000	32500000	81400000	69500000	7.91062	7.84198	48919	74043	CMGC/CDK	CDK9
O94913	1	Pre-mRNA cleavage complex 2 protein Pcf11 OS=Homo sapiens GN=PCF11 PE=1 SV=3 - [PCF11_HUMAN]	O94913	S777	Pre-mRNA cleavage complex 2 protein Pcf11 (Pre-mRNA cleavage complex II protein Pcf11)	PCF11 KIAA0824	FEGPNKLSPRIDGPP	1.118	0.851789	0.16092	-0.231432	1.13158	0.762351	0.178337	-0.391473	8890000	36800000	9940000	43200000	18830000	80000000	7.27485	7.90309	37138	55114	CMGC/CDK	CDK9
O94915	1	Protein furry homolog-like OS=Homo sapiens GN=FRYL PE=1 SV=2 - [FRYL_HUMAN]	O94915	S1941	Protein furry homolog-like (ALL1-fused gene from chromosome 4p12 protein)	FRYL AF4P12 KIAA0826	NSNARSNSLRLSLIG	0.717	0.919963	-0.479955	-0.120352	0.725709	0.823367	-0.462538	-0.280392	24000000	11200000	17200000	12200000	41200000	23400000	7.6149	7.36922	38287	56101
O94915	1	Protein furry homolog-like OS=Homo sapiens GN=FRYL PE=1 SV=2 - [FRYL_HUMAN]	O94915	S1972	Protein furry homolog-like (ALL1-fused gene from chromosome 4p12 protein)	FRYL AF4P12 KIAA0826	GRINHSSSLARTRSL	0.734	0.87184	-0.446148	-0.197865	0.742915	0.780296	-0.428731	-0.357906	80700000	43900000	59200000	50400000	139900000	94300000	8.14582	7.97451	42111	138845
O94915	1	Protein furry homolog-like OS=Homo sapiens GN=FRYL PE=1 SV=2 - [FRYL_HUMAN]	O94915	S1978	Protein furry homolog-like (ALL1-fused gene from chromosome 4p12 protein)	FRYL AF4P12 KIAA0826	SSLARTRSLSSLREK	0.816	1.06496	-0.293359	0.0908029	0.825911	0.953142	-0.275942	-0.0692375	79900000	24400000	65200000	22900000	145100000	47300000	8.16167	7.67486	52790	83590
O94915	1	Protein furry homolog-like OS=Homo sapiens GN=FRYL PE=1 SV=2 - [FRYL_HUMAN]	O94915	S1981	Protein furry homolog-like (ALL1-fused gene from chromosome 4p12 protein)	FRYL AF4P12 KIAA0826	ARTRSLSSLREKGMY	0.838	1.21507	-0.254978	0.281036	0.848178	1.08748	-0.237561	0.120995	3760000	461000	3150000	379000	6910000	840000	6.83948	5.92428	42919	63093
O94915	1	Protein furry homolog-like OS=Homo sapiens GN=FRYL PE=1 SV=2 - [FRYL_HUMAN]	O94915	S2272	Protein furry homolog-like (ALL1-fused gene from chromosome 4p12 protein)	FRYL AF4P12 KIAA0826	TYGGDTGSPEISFTK	1.003	1.04493	0.00432161	0.0634092	1.01518	0.935214	0.0217387	-0.0966312	49800000	39900000	49900000	38200000	99700000	78100000	7.9987	7.89265	5507	118029
Q5TBA9;O94915	2	Protein furry homolog OS=Homo sapiens GN=FRY PE=1 SV=1 - [FRY_HUMAN]|Protein furry homolog-like OS=Homo sapiens GN=FRYL PE=1 SV=2 - [FRYL_HUMAN]	O94915	S2454	Protein furry homolog-like (ALL1-fused gene from chromosome 4p12 protein)	FRYL AF4P12 KIAA0826	NWGVRRRSLDSIDKG	0.949	1.02775	-0.07552	0.0394883	0.960526	0.919836	-0.058103	-0.120552	5780000	1320000	5480000	1280000	11260000	2600000	7.05154	6.41497	54860	100237
O94915	1	Protein furry homolog-like OS=Homo sapiens GN=FRYL PE=1 SV=2 - [FRYL_HUMAN]	O94915	T1959	Protein furry homolog-like (ALL1-fused gene from chromosome 4p12 protein)	FRYL AF4P12 KIAA0826	GDRRRSNTLDIMDGR	0.877	0.921659	-0.189351	-0.117695	0.887652	0.824885	-0.171934	-0.277735	192000000	133000000	168000000	144000000	360000000	277000000	8.5563	8.44248	5528	26828
O94916	1	Nuclear factor of activated T-cells 5 OS=Homo sapiens GN=NFAT5 PE=1 SV=1 - [NFAT5_HUMAN]	O94916	S561	Nuclear factor of activated T-cells 5 (NF-AT5) (T-cell transcription factor NFAT5) (Tonicity-responsive enhancer-binding protein) (TonE-binding protein) (TonEBP)	NFAT5 KIAA0827 TONEBP	NVKKEISSPARPCSF	1.012	1.08696	0.0172093	0.120294	1.02429	0.972826	0.0346263	-0.0397462	70000000	37600000	70800000	34600000	140800000	72200000	8.1486	7.85854	76078	47939
O94921	1	Serine/threonine-protein kinase PFTAIRE-1 OS=Homo sapiens GN=PFTK1 PE=1 SV=3 - [PFTK1_HUMAN]	O94921	S24	Cyclin-dependent kinase 14 (EC 2.7.11.22) (Cell division protein kinase 14) (Serine/threonine-protein kinase PFTAIRE-1) (hPFTAIRE1)	CDK14 KIAA0834 PFTK1	KKLRRTLSESFSRIA	0.867	0.410172	-0.205896	-1.2857	0.87753	0.367104	-0.188479	-1.44574	7320000	12000000	6350000	29300000	13670000	41300000	7.13577	7.61595	104972	115636	CAMK/MLCK	SgK085, skMLCK
O94921	1	Serine/threonine-protein kinase PFTAIRE-1 OS=Homo sapiens GN=PFTK1 PE=1 SV=3 - [PFTK1_HUMAN]	O94921	S78	Cyclin-dependent kinase 14 (EC 2.7.11.22) (Cell division protein kinase 14) (Serine/threonine-protein kinase PFTAIRE-1) (hPFTAIRE1)	CDK14 KIAA0834 PFTK1	VRVQRTQSTFDPFEK	1.337	1.75439	0.418999	0.810966	1.35324	1.57018	0.436417	0.650926	5370000	3370000	7190000	1920000	12560000	5290000	7.09899	6.72346	34254	125889
O94923	1	D-glucuronyl C5-epimerase OS=Homo sapiens GN=GLCE PE=1 SV=2 - [GLCE_HUMAN]	O94923	S73	D-glucuronyl C5-epimerase (EC 5.1.3.-) (Heparin/heparan sulfate:glucuronic acid C5-epimerase)	GLCE KIAA0836	NHVAKQQSEEAFPQE	1.075	0.922509	0.104337	-0.116365	1.08806	0.825646	0.121754	-0.276405	248000000	101000000	267000000	109000000	515000000	210000000	8.71181	8.32222	4144	26456
O94929	1	Actin-binding LIM protein 3 OS=Homo sapiens GN=ABLIM3 PE=1 SV=3 - [ABLM3_HUMAN]	O94929	S280	Actin-binding LIM protein 3 (abLIM-3) (Actin-binding LIM protein family member 3)	ABLIM3 KIAA0843 HMFN1661	HRRTSETSISPPGSS	0.959	0.313381	-0.0603973	-1.67401	0.970648	0.280476	-0.0429802	-1.83405	33500000	189000	32100000	602000	65600000	791000	7.8169	5.89818	4453	98047
O94929	1	Actin-binding LIM protein 3 OS=Homo sapiens GN=ABLIM3 PE=1 SV=3 - [ABLM3_HUMAN]	O94929	S282	Actin-binding LIM protein 3 (abLIM-3) (Actin-binding LIM protein family member 3)	ABLIM3 KIAA0843 HMFN1661	RTSETSISPPGSSIG	0.716	0.831947	-0.481969	-0.265437	0.724696	0.744592	-0.464551	-0.425477	33600000	17100000	24100000	20600000	57700000	37700000	7.76118	7.57634	70556	27308
O94929	1	Actin-binding LIM protein 3 OS=Homo sapiens GN=ABLIM3 PE=1 SV=3 - [ABLM3_HUMAN]	O94929	S373	Actin-binding LIM protein 3 (abLIM-3) (Actin-binding LIM protein family member 3)	ABLIM3 KIAA0843 HMFN1661	LRQRRASSPGYIDSP	1.038	1.10619	0.0538064	0.145605	1.05061	0.990044	0.0712235	-0.0144351	236000000	174000000	245000000	157000000	481000000	331000000	8.68215	8.51983	4444	115799
O94929	1	Actin-binding LIM protein 3 OS=Homo sapiens GN=ABLIM3 PE=1 SV=3 - [ABLM3_HUMAN]	O94929	S379	Actin-binding LIM protein 3 (abLIM-3) (Actin-binding LIM protein family member 3)	ABLIM3 KIAA0843 HMFN1661	SSPGYIDSPTYSRQG	0.815	0.992063	-0.295128	-0.0114956	0.824899	0.887897	-0.277711	-0.171536	1690000	29200000	1380000	29400000	3070000	58600000	6.48714	7.7679	20805	96778
O94929	1	Actin-binding LIM protein 3 OS=Homo sapiens GN=ABLIM3 PE=1 SV=3 - [ABLM3_HUMAN]	O94929	S388	Actin-binding LIM protein 3 (abLIM-3) (Actin-binding LIM protein family member 3)	ABLIM3 KIAA0843 HMFN1661	TYSRQGMSPTFSRSP	0.841	1.17925	-0.249822	0.237864	0.851215	1.05542	-0.232405	0.0778234	212000000	206000000	178000000	175000000	390000000	381000000	8.59106	8.58092	3416	26041
O94929	1	Actin-binding LIM protein 3 OS=Homo sapiens GN=ABLIM3 PE=1 SV=3 - [ABLM3_HUMAN]	O94929	S493	Actin-binding LIM protein 3 (abLIM-3) (Actin-binding LIM protein family member 3)	ABLIM3 KIAA0843 HMFN1661	EYWTYHGSPKVPRAR	1.104	0.997009	0.14274	-0.00432161	1.11741	0.892323	0.160157	-0.164362	16200000	55200000	17900000	55400000	34100000	110600000	7.53275	8.04376	76809	45749
O94929	1	Actin-binding LIM protein 3 OS=Homo sapiens GN=ABLIM3 PE=1 SV=3 - [ABLM3_HUMAN]	O94929	S503	Actin-binding LIM protein 3 (abLIM-3) (Actin-binding LIM protein family member 3)	ABLIM3 KIAA0843 HMFN1661	VPRARRFSSGGEEDD	1.144	1.12486	0.194087	0.169745	1.15789	1.00675	0.211504	0.00970426	164000000	82100000	188000000	73000000	352000000	155100000	8.54654	8.19061	40412	144830
O94929	1	Actin-binding LIM protein 3 OS=Homo sapiens GN=ABLIM3 PE=1 SV=3 - [ABLM3_HUMAN]	O94929	S504	Actin-binding LIM protein 3 (abLIM-3) (Actin-binding LIM protein family member 3)	ABLIM3 KIAA0843 HMFN1661	PRARRFSSGGEEDDF	1.205	0.972763	0.269033	-0.0398403	1.21964	0.870623	0.28645	-0.199881	40500000	7760000	48900000	7980000	89400000	15740000	7.95134	7.197	82600	144776
O94929	1	Actin-binding LIM protein 3 OS=Homo sapiens GN=ABLIM3 PE=1 SV=3 - [ABLM3_HUMAN]	O94929	S567	Actin-binding LIM protein 3 (abLIM-3) (Actin-binding LIM protein family member 3)	ABLIM3 KIAA0843 HMFN1661	YEMSLNGSPRSHYLA	0.947	1.0627	-0.0785637	0.0877334	0.958502	0.951116	-0.0611466	-0.072307	88400000	53700000	83700000	50500000	172100000	104200000	8.23578	8.01787	40601	60501
O94929	1	Actin-binding LIM protein 3 OS=Homo sapiens GN=ABLIM3 PE=1 SV=3 - [ABLM3_HUMAN]	O94929	S576	Actin-binding LIM protein 3 (abLIM-3) (Actin-binding LIM protein family member 3)	ABLIM3 KIAA0843 HMFN1661	RSHYLADSDPLISKS	1.231	1.11607	0.299831	0.158429	1.24595	0.998884	0.317248	-0.00161105	2930000	4270000	3600000	3830000	6530000	8100000	6.81491	6.90849	41201	61313
O94929	1	Actin-binding LIM protein 3 OS=Homo sapiens GN=ABLIM3 PE=1 SV=3 - [ABLM3_HUMAN]	O94929	S585	Actin-binding LIM protein 3 (abLIM-3) (Actin-binding LIM protein family member 3)	ABLIM3 KIAA0843 HMFN1661	PLISKSASLPAYRRN	1.008	1.02881	0.0114956	0.0409718	1.02024	0.920782	0.0289127	-0.119069	12400000	44700000	12500000	43400000	24900000	88100000	7.3962	7.94498	104833	26924
O94967	1	WD repeat-containing protein 47 OS=Homo sapiens GN=WDR47 PE=1 SV=1 - [WDR47_HUMAN]	O94967	S422	WD repeat-containing protein 47	WDR47 KIAA0893	EKNELRDSTEQFQEY	0.728	1.07759	-0.45799	0.107803	0.736842	0.96444	-0.440573	-0.0522371	50400000	18800000	36700000	17400000	87100000	36200000	7.94002	7.55871	37716	135658
O94979	1	Protein transport protein Sec31A OS=Homo sapiens GN=SEC31A PE=1 SV=3 - [SC31A_HUMAN]	O94979	S1163	Protein transport protein Sec31A (ABP125) (ABP130) (SEC31-like protein 1) (SEC31-related protein A) (Web1-like protein)	SEC31A KIAA0905 SEC31L1 HSPC275 HSPC334	KLREQTLSPTITSGL	0.871	1.22249	-0.199255	0.289827	0.881579	1.09413	-0.181838	0.129787	88200000	418000000	76800000	342000000	165000000	760000000	8.21748	8.88081	49231	74414
O94979	1	Protein transport protein Sec31A OS=Homo sapiens GN=SEC31A PE=1 SV=3 - [SC31A_HUMAN]	O94979	S527	Protein transport protein Sec31A (ABP125) (ABP130) (SEC31-like protein 1) (SEC31-related protein A) (Web1-like protein)	SEC31A KIAA0905 SEC31L1 HSPC275 HSPC334	DSDQVAQSDGEESPA	1.142	1.38504	0.191563	0.469929	1.15587	1.23961	0.20898	0.309889	33200000	21100000	37900000	15300000	71100000	36400000	7.85187	7.5611	31360	42125
O94979	1	Protein transport protein Sec31A OS=Homo sapiens GN=SEC31A PE=1 SV=3 - [SC31A_HUMAN]	O94979	S799	Protein transport protein Sec31A (ABP125) (ABP130) (SEC31-like protein 1) (SEC31-related protein A) (Web1-like protein)	SEC31A KIAA0905 SEC31L1 HSPC275 HSPC334	EPVAGHESPKIPYEK	0.928	1.21212	-0.107803	0.277534	0.939271	1.08485	-0.0903862	0.117494	3140000000	1990000000	2910000000	1640000000	6050000000	3630000000	9.78176	9.55991	43203	142140
O94989	1	Rho guanine nucleotide exchange factor 15 OS=Homo sapiens GN=ARHGEF15 PE=1 SV=3 - [ARHGF_HUMAN]	O94989	S26	Rho guanine nucleotide exchange factor 15 (Ephexin-5) (E5) (Vsm-RhoGEF)	ARHGEF15 KIAA0915	IIRPRPPSRSRAAQS	1.01	1.38313	0.0143553	0.467932	1.02227	1.2379	0.0317723	0.307892	24900000	196000000	25200000	141000000	50100000	337000000	7.69984	8.52763	52518	85848
O94989	1	Rho guanine nucleotide exchange factor 15 OS=Homo sapiens GN=ARHGEF15 PE=1 SV=3 - [ARHGF_HUMAN]	O94989	S33	Rho guanine nucleotide exchange factor 15 (Ephexin-5) (E5) (Vsm-RhoGEF)	ARHGEF15 KIAA0915	SRSRAAQSPGPPHNG	0.889	1.05597	-0.169745	0.0785637	0.899798	0.94509	-0.152328	-0.0814767	33600000	21600000	29900000	20400000	63500000	42000000	7.80277	7.62325	77915	134181
O94989	1	Rho guanine nucleotide exchange factor 15 OS=Homo sapiens GN=ARHGEF15 PE=1 SV=3 - [ARHGF_HUMAN]	O94989	S41	Rho guanine nucleotide exchange factor 15 (Ephexin-5) (E5) (Vsm-RhoGEF)	ARHGEF15 KIAA0915	PGPPHNGSSPQELPR	0.91	0.84317	-0.136062	-0.246104	0.921053	0.754637	-0.118644	-0.406144	307000000	17900000	280000000	21200000	587000000	39100000	8.76864	7.59218	36044	134419
O94989	1	Rho guanine nucleotide exchange factor 15 OS=Homo sapiens GN=ARHGEF15 PE=1 SV=3 - [ARHGF_HUMAN]	O94989	S42	Rho guanine nucleotide exchange factor 15 (Ephexin-5) (E5) (Vsm-RhoGEF)	ARHGEF15 KIAA0915	GPPHNGSSPQELPRN	0.91	0.98912	-0.136062	-0.015783	0.921053	0.885262	-0.118644	-0.175823	307000000	240000000	280000000	243000000	587000000	483000000	8.76864	8.68395	36044	51135
O95104	1	Splicing factor, arginine/serine-rich 15 OS=Homo sapiens GN=SFRS15 PE=1 SV=3 - [SFR15_HUMAN]	O95104	T236	Splicing factor, arginine/serine-rich 15 (CTD-binding SR-like protein RA4) (SR-related and CTD-associated factor 4)	SCAF4 KIAA1172 SFRS15	AITAQLKTTPTQPSE	1.174	1.24688	0.231432	0.318326	1.18826	1.11596	0.248849	0.158285	15600000	7030000	18300000	5630000	33900000	12660000	7.5302	7.10243	2913	21780
O95104	1	Splicing factor, arginine/serine-rich 15 OS=Homo sapiens GN=SFRS15 PE=1 SV=3 - [SFR15_HUMAN]	O95104	T237	Splicing factor, arginine/serine-rich 15 (CTD-binding SR-like protein RA4) (SR-related and CTD-associated factor 4)	SCAF4 KIAA1172 SFRS15	ITAQLKTTPTQPSEQ	1.171	1.18765	0.227741	0.248108	1.18522	1.06295	0.245158	0.0880674	15100000	18400000	17700000	15500000	32800000	33900000	7.51587	7.5302	7070	112083
O95149	1	Snurportin-1 OS=Homo sapiens GN=SNUPN PE=1 SV=1 - [SPN1_HUMAN]	O95149	S350	Snurportin-1 (RNA U transporter 1)	SNUPN RNUT1 SPN1	KLKGSSHSPDHPGCL	1.007	1.07066	0.0100637	0.0985055	1.01923	0.958244	0.0274807	-0.0615349	19200000	2130000	19300000	1990000	38500000	4120000	7.58546	6.6149	78515	168725
O95155	1	Ubiquitin conjugation factor E4 B OS=Homo sapiens GN=UBE4B PE=1 SV=1 - [UBE4B_HUMAN]	O95155	S105	Ubiquitin conjugation factor E4 B (Homozygously deleted in neuroblastoma 1) (Ubiquitin fusion degradation protein 2)	UBE4B HDNB1 KIAA0684 UFD2	QSLSRSQSMDIDGVS	1.086	1.59236	0.119024	0.671164	1.09919	1.42516	0.136441	0.511123	16300000	27700000	17700000	17400000	34000000	45100000	7.53148	7.65418	3701	23460
O95208	1	Epsin-2 OS=Homo sapiens GN=EPN2 PE=1 SV=2 - [EPN2_HUMAN]	O95208	S172	Epsin-2 (EPS-15-interacting protein 2)	EPN2 KIAA1065	QITFGRGSSQPNLST	0.898	1.26103	-0.155213	0.334607	0.908907	1.12863	-0.137796	0.174567	486000000	72200000	436000000	57200000	922000000	129400000	8.96473	8.11193	32520	134114
O95208	1	Epsin-2 OS=Homo sapiens GN=EPN2 PE=1 SV=2 - [EPN2_HUMAN]	O95208	S173	Epsin-2 (EPS-15-interacting protein 2)	EPN2 KIAA1065	ITFGRGSSQPNLSTS	0.911	1.0352	-0.134477	0.0499049	0.922065	0.926501	-0.11706	-0.110136	513000000	145000000	468000000	140000000	981000000	285000000	8.99167	8.45484	74758	54155
O95208	1	Epsin-2 OS=Homo sapiens GN=EPN2 PE=1 SV=2 - [EPN2_HUMAN]	O95208	S178	Epsin-2 (EPS-15-interacting protein 2)	EPN2 KIAA1065	GSSQPNLSTSHSEQE	0.898	1.02564	-0.155213	0.0365259	0.908907	0.917949	-0.137796	-0.123515	486000000	30700000	436000000	29900000	922000000	60600000	8.96473	7.78247	32520	130089
O95218	1	Zinc finger Ran-binding domain-containing protein 2 OS=Homo sapiens GN=ZRANB2 PE=1 SV=2 - [ZRAB2_HUMAN]	O95218	S120	Zinc finger Ran-binding domain-containing protein 2 (Zinc finger protein 265) (Zinc finger, splicing)	ZRANB2 ZIS ZNF265	EYIEREESDGEYDEF	0.916	1.31752	-0.12658	0.397828	0.927126	1.17918	-0.109163	0.237788	524000000	336000000	480000000	255000000	1004000000	591000000	9.00173	8.77159	46704	148855
O95218	1	Zinc finger Ran-binding domain-containing protein 2 OS=Homo sapiens GN=ZRANB2 PE=1 SV=2 - [ZRAB2_HUMAN]	O95218	S153	Zinc finger Ran-binding domain-containing protein 2 (Zinc finger protein 265) (Zinc finger, splicing)	ZRANB2 ZIS ZNF265	KEVEDKESEGEEEDE	0.946	1.42045	-0.0800879	0.506353	0.95749	1.27131	-0.0626709	0.346312	6790000	4510000	6420000	3180000	13210000	7690000	7.1209	6.88593	30124	40803
O95218	1	Zinc finger Ran-binding domain-containing protein 2 OS=Homo sapiens GN=ZRANB2 PE=1 SV=2 - [ZRAB2_HUMAN]	O95218	S188	Zinc finger Ran-binding domain-containing protein 2 (Zinc finger protein 265) (Zinc finger, splicing)	ZRANB2 ZIS ZNF265	SKYNLDASEEEDSNK	1.107	1.14025	0.146655	0.189351	1.12045	1.02052	0.164072	0.0293108	1910000000	1000000000	2110000000	878000000	4020000000	1878000000	9.60423	9.2737	4085	26786
O95218	1	Zinc finger Ran-binding domain-containing protein 2 OS=Homo sapiens GN=ZRANB2 PE=1 SV=2 - [ZRAB2_HUMAN]	O95218	Y114	Zinc finger Ran-binding domain-containing protein 2 (Zinc finger protein 265) (Zinc finger, splicing)	ZRANB2 ZIS ZNF265	NERENVEYIEREESD	0.93	1.31752	-0.104697	0.397828	0.941296	1.17918	-0.0872803	0.237788	3400000	336000000	3160000	255000000	6560000	591000000	6.8169	8.77159	48714	148855
O95232	1	Cisplatin resistance-associated overexpressed protein OS=Homo sapiens GN=CROP PE=1 SV=2 - [CROP_HUMAN]	O95232	S425	Luc7-like protein 3 (Cisplatin resistance-associated-overexpressed protein) (Luc7A) (Okadaic acid-inducible phosphoprotein OA48-18) (cAMP regulatory element-associated protein 1) (CRE-associated protein 1) (CREAP-1)	LUC7L3 CREAP1 CROP O48	GTSEDIKSEGDTQSN	0.91	1.04932	-0.136062	0.0694519	0.921053	0.93914	-0.118644	-0.0905885	45100000	8340000	41100000	7950000	86200000	16290000	7.93551	7.21192	74506	123649	CMGC	CLK1, SRPK1, SRPK2
O95232	1	Cisplatin resistance-associated overexpressed protein OS=Homo sapiens GN=CROP PE=1 SV=2 - [CROP_HUMAN]	O95232	S431	Luc7-like protein 3 (Cisplatin resistance-associated-overexpressed protein) (Luc7A) (Okadaic acid-inducible phosphoprotein OA48-18) (cAMP regulatory element-associated protein 1) (CRE-associated protein 1) (CREAP-1)	LUC7L3 CREAP1 CROP O48	KSEGDTQSN******	0.988	1.1919	-0.0174171	0.253257	1	1.06675	0	0.0932169	92800000	50800000	91600000	42600000	184400000	93400000	8.26576	7.97035	35676	133851	CMGC	CLK1, SRPK1, SRPK2
O95235	1	Kinesin-like protein KIF20A OS=Homo sapiens GN=KIF20A PE=1 SV=1 - [KI20A_HUMAN]	O95235	S532	Kinesin-like protein KIF20A (GG10_2) (Mitotic kinesin-like protein 2) (MKlp2) (Rab6-interacting kinesin-like protein) (Rabkinesin-6)	KIF20A MKLP2 RAB6KIFL	KEHSLQVSPSLEKGA	1.098	1.03627	0.134878	0.0513992	1.11134	0.927461	0.152295	-0.108641	10800000	3470000	11800000	3350000	22600000	6820000	7.35411	6.83378	40413	144829	Other/PLK	PLK1
O95239	1	Chromosome-associated kinesin KIF4A OS=Homo sapiens GN=KIF4A PE=1 SV=3 - [KIF4A_HUMAN]	O95239	S801	Chromosome-associated kinesin KIF4A (Chromokinesin-A)	KIF4A KIF4	KLRRRTFSLTEVRGQ	1.405	1.60256	0.49057	0.680382	1.42206	1.43429	0.507987	0.520342	5340000	44900000	7490000	28000000	12830000	72900000	7.10823	7.86273	106671	118812	AGC/AKT	AKT1
O95239	1	Chromosome-associated kinesin KIF4A OS=Homo sapiens GN=KIF4A PE=1 SV=3 - [KIF4A_HUMAN]	O95239	T799	Chromosome-associated kinesin KIF4A (Chromokinesin-A)	KIF4A KIF4	PPKLRRRTFSLTEVR	1.367	1.34771	0.451013	0.430509	1.3836	1.2062	0.46843	0.270468	29300000	28000000	40100000	20800000	69400000	48800000	7.84136	7.68842	5685	110952	CAMK/DAPK	DAPK3
O95248	1	Myotubularin-related protein 5 OS=Homo sapiens GN=SBF1 PE=1 SV=3 - [MTMR5_HUMAN]	O95248	T1137	Myotubularin-related protein 5 (SET-binding factor 1) (Sbf1)	SBF1 MTMR5	YQRLGLGTLSSSLSR	1.032	0.990099	0.045443	-0.0143553	1.04453	0.886139	0.06286	-0.174396	20400000	59900000	21000000	60500000	41400000	120400000	7.617	8.08063	6749	30490
O95251	1	Histone acetyltransferase MYST2 OS=Homo sapiens GN=MYST2 PE=1 SV=1 - [MYST2_HUMAN]	O95251	S57	Histone acetyltransferase KAT7 (EC 2.3.1.48) (Histone acetyltransferase binding to ORC1) (Lysine acetyltransferase 7) (MOZ, YBF2/SAS3, SAS2 and TIP60 protein 2) (MYST-2)	KAT7 HBO1 HBOa MYST2	SQSSQDSSPVRNLQS	1.032	1.19332	0.045443	0.254978	1.04453	1.06802	0.06286	0.0949374	89000000	64300000	91900000	53800000	180900000	118100000	8.25744	8.07225	7241	112314	CMGC/CDK/CDC2	CDC2
O95251	1	Histone acetyltransferase MYST2 OS=Homo sapiens GN=MYST2 PE=1 SV=1 - [MYST2_HUMAN]	O95251	T88	Histone acetyltransferase KAT7 (EC 2.3.1.48) (Histone acetyltransferase binding to ORC1) (Lysine acetyltransferase 7) (MOZ, YBF2/SAS3, SAS2 and TIP60 protein 2) (MYST-2)	KAT7 HBO1 HBOa MYST2	QQQPTPVTPKKYPLR	0.988	0.95511	-0.0174171	-0.0662614	1	0.854823	0	-0.226302	21500000	34700000	21200000	36400000	42700000	71100000	7.63043	7.85187	3045	112505	CMGC/CDK/CDC2	CDC2
O95292	1	Vesicle-associated membrane protein-associated protein B/C OS=Homo sapiens GN=VAPB PE=1 SV=3 - [VAPB_HUMAN]	O95292	S156	Vesicle-associated membrane protein-associated protein B/C (VAMP-B/VAMP-C) (VAMP-associated protein B/C) (VAP-B/VAP-C)	VAPB UNQ484/PRO983	ETPIVSKSLSSSLDD	1.083	0.94518	0.115033	-0.0813396	1.09615	0.845936	0.13245	-0.24138	4170000	4370000	4520000	4630000	8690000	9000000	6.93902	6.95424	101288	100762
O95292	1	Vesicle-associated membrane protein-associated protein B/C OS=Homo sapiens GN=VAPB PE=1 SV=3 - [VAPB_HUMAN]	O95292	S158	Vesicle-associated membrane protein-associated protein B/C (VAMP-B/VAMP-C) (VAMP-associated protein B/C) (VAP-B/VAP-C)	VAPB UNQ484/PRO983	PIVSKSLSSSLDDTE	1.125	1.33156	0.169925	0.413115	1.13866	1.19174	0.187342	0.253075	5140000	9120000	5780000	6850000	10920000	15970000	7.03822	7.2033	67475	18789
O95292	1	Vesicle-associated membrane protein-associated protein B/C OS=Homo sapiens GN=VAPB PE=1 SV=3 - [VAPB_HUMAN]	O95292	S160	Vesicle-associated membrane protein-associated protein B/C (VAMP-B/VAMP-C) (VAMP-associated protein B/C) (VAP-B/VAP-C)	VAPB UNQ484/PRO983	VSKSLSSSLDDTEVK	1.086	1.0661	0.119024	0.0923402	1.09919	0.954158	0.136441	-0.0677002	72800000	42400000	79000000	39800000	151800000	82200000	8.18127	7.91487	4486	115940	STE/STE11	MAP3K5
O95295	1	SNARE-associated protein Snapin OS=Homo sapiens GN=SNAPIN PE=1 SV=1 - [SNAPN_HUMAN]	O95295	S133	SNARE-associated protein Snapin (Synaptosomal-associated protein 25-binding protein) (SNAP-associated protein)	SNAPIN SNAP25BP SNAPAP	SGIYPPGSPGK****	1.102	0.921659	0.140124	-0.117695	1.11538	0.824885	0.157541	-0.277735	36800000	32700000	40600000	35500000	77400000	68200000	7.88874	7.83378	5159	24360	CMGC/MAPK	p38a
O95297	1	Myelin protein zero-like protein 1 OS=Homo sapiens GN=MPZL1 PE=1 SV=1 - [MPZL1_HUMAN]	O95297	S210	Myelin protein zero-like protein 1 (Protein zero-related)	MPZL1 PZR UNQ849/PRO1787	CSTSESLSPVKQAPR	0.737	1.15207	-0.440263	0.204233	0.745951	1.03111	-0.422846	0.0441926	3200000	3050000	2360000	2640000	5560000	5690000	6.74507	6.75511	66981	100366	CMGC/MAPK	Erk1
O95340	1	Bifunctional 3'-phosphoadenosine 5'-phosphosulfate synthetase 2 OS=Homo sapiens GN=PAPSS2 PE=1 SV=2 - [PAPS2_HUMAN]	O95340	S92	Bifunctional 3'-phosphoadenosine 5'-phosphosulfate synthase 2 (PAPS synthase 2) (PAPSS 2) (Sulfurylase kinase 2) (SK 2) (SK2) [Includes: Sulfate adenylyltransferase (EC 2.7.7.4) (ATP-sulfurylase) (Sulfate adenylate transferase) (SAT); Adenylyl-sulfate kinase (EC 2.7.1.25) (3'-phosphoadenosine-5'-phosphosulfate synthase) (APS kinase) (Adenosine-5'-phosphosulfate 3'-phosphotransferase) (Adenylylsul…	PAPSS2 ATPSK2	LNRNLGFSPGDREEN	1.041	1.36612	0.0579701	0.450084	1.05364	1.22268	0.0753871	0.290044	5310000	2940000	5530000	2150000	10840000	5090000	7.03503	6.70672	51064	170043
O95359	1	Transforming acidic coiled-coil-containing protein 2 OS=Homo sapiens GN=TACC2 PE=1 SV=3 - [TACC2_HUMAN]	O95359	S2072	Transforming acidic coiled-coil-containing protein 2 (Anti-Zuai-1) (AZU-1)	TACC2	KVNTRRKSTDSVPIS	1.596	1.3947	0.674461	0.479955	1.61538	1.24826	0.691878	0.319915	5350000	8120000	8540000	5820000	13890000	13940000	7.1427	7.14426	91518	168489	AGC	PKN1
O95359	1	Transforming acidic coiled-coil-containing protein 2 OS=Homo sapiens GN=TACC2 PE=1 SV=3 - [TACC2_HUMAN]	O95359	S2226	Transforming acidic coiled-coil-containing protein 2 (Anti-Zuai-1) (AZU-1)	TACC2	GGGRVQNSPPVGRKT	0.936	1.00908	-0.0954196	0.013043	0.947368	0.903128	-0.0780025	-0.146997	50800000	28800000	47500000	28600000	98300000	57400000	7.99255	7.75891	39368	143451	CMGC/CDK	PCTAIRE2
O95359	1	Transforming acidic coiled-coil-containing protein 2 OS=Homo sapiens GN=TACC2 PE=1 SV=3 - [TACC2_HUMAN]	O95359	S2317	Transforming acidic coiled-coil-containing protein 2 (Anti-Zuai-1) (AZU-1)	TACC2	KLDNTPASPPRSPAE	1.001	1.15207	0.00144197	0.204233	1.01316	1.03111	0.018859	0.0441926	27800000	37300000	27800000	32400000	55600000	69700000	7.74507	7.84323	30733	124980	CMGC/CDK	PCTAIRE2
O95359	1	Transforming acidic coiled-coil-containing protein 2 OS=Homo sapiens GN=TACC2 PE=1 SV=3 - [TACC2_HUMAN]	O95359	S2321	Transforming acidic coiled-coil-containing protein 2 (Anti-Zuai-1) (AZU-1)	TACC2	TPASPPRSPAEPNDI	1.078	1.19617	0.108357	0.258425	1.09109	1.07057	0.125774	0.0983847	361000000	276000000	389000000	230000000	750000000	506000000	8.87506	8.70415	105852	28064	CMGC/CDK	PCTAIRE2
O95359	1	Transforming acidic coiled-coil-containing protein 2 OS=Homo sapiens GN=TACC2 PE=1 SV=3 - [TACC2_HUMAN]	O95359	S2359	Transforming acidic coiled-coil-containing protein 2 (Anti-Zuai-1) (AZU-1)	TACC2	STSKMQESPKLPQQS	0.796	1.42857	-0.32916	0.514573	0.805668	1.27857	-0.311743	0.354533	13300000	73600000	10600000	51600000	23900000	125200000	7.3784	8.0976	31420	42357	CMGC/CDK	PCTAIRE2
O95359	1	Transforming acidic coiled-coil-containing protein 2 OS=Homo sapiens GN=TACC2 PE=1 SV=3 - [TACC2_HUMAN]	O95359	S2569	Transforming acidic coiled-coil-containing protein 2 (Anti-Zuai-1) (AZU-1)	TACC2	SPVRMSESPTPCSGS	1.02	1.14679	0.0285692	0.1976	1.03239	1.02638	0.0459862	0.0375595	47000000	126000000	48000000	110000000	95000000	236000000	7.97772	8.37291	68382	15526	CMGC/CDK	PCTAIRE2
O95365	1	Zinc finger and BTB domain-containing protein 7A OS=Homo sapiens GN=ZBTB7A PE=1 SV=1 - [ZBT7A_HUMAN]	O95365	S337	Zinc finger and BTB domain-containing protein 7A (Factor binding IST protein 1) (FBI-1) (Factor that binds to inducer of short transcripts protein 1) (HIV-1 1st-binding protein 1) (Leukemia/lymphoma-related factor) (POZ and Krueppel erythroid myeloid ontogenic factor) (POK erythroid myeloid ontogenic factor) (Pokemon) (TTF-I-interacting peptide 21) (TIP21) (Zinc finger protein 857A)	ZBTB7A FBI1 LRF ZBTB7 ZNF857A	AGAAAGDSDEESRAD	0.921	1.54799	-0.118727	0.630394	0.932186	1.38545	-0.10131	0.470354	62700000	24500000	57700000	15800000	120400000	40300000	8.08063	7.60531	43656	64390
O95365	1	Zinc finger and BTB domain-containing protein 7A OS=Homo sapiens GN=ZBTB7A PE=1 SV=1 - [ZBT7A_HUMAN]	O95365	S549	Zinc finger and BTB domain-containing protein 7A (Factor binding IST protein 1) (FBI-1) (Factor that binds to inducer of short transcripts protein 1) (HIV-1 1st-binding protein 1) (Leukemia/lymphoma-related factor) (POZ and Krueppel erythroid myeloid ontogenic factor) (POK erythroid myeloid ontogenic factor) (Pokemon) (TTF-I-interacting peptide 21) (TIP21) (Zinc finger protein 857A)	ZBTB7A FBI1 LRF ZBTB7 ZNF857A	DEDEDVASPDGLGRL	0.892	1.20919	-0.164884	0.274041	0.902834	1.08222	-0.147467	0.114	88700000	20800000	79100000	17200000	167800000	38000000	8.22479	7.57978	53137	84127	CMGC/CDK/CDC2	CDK2
O95394	1	Phosphoacetylglucosamine mutase OS=Homo sapiens GN=PGM3 PE=1 SV=1 - [AGM1_HUMAN]	O95394	S64	Phosphoacetylglucosamine mutase (PAGM) (EC 5.4.2.3) (Acetylglucosamine phosphomutase) (N-acetylglucosamine-phosphate mutase) (Phosphoglucomutase-3) (PGM 3)	PGM3 AGM1	IGVMVTASHNPEEDN	0.917	1.3986	-0.125006	0.483985	0.928138	1.25175	-0.107589	0.323944	715000000	1350000000	655000000	968000000	1370000000	2318000000	9.13672	9.36511	33275	47969
O95394	1	Phosphoacetylglucosamine mutase OS=Homo sapiens GN=PGM3 PE=1 SV=1 - [AGM1_HUMAN]	O95394	T62	Phosphoacetylglucosamine mutase (PAGM) (EC 5.4.2.3) (Acetylglucosamine phosphomutase) (N-acetylglucosamine-phosphate mutase) (Phosphoglucomutase-3) (PGM 3)	PGM3 AGM1	STIGVMVTASHNPEE	0.915	1.46843	-0.128156	0.554273	0.926113	1.31424	-0.110739	0.394233	57500000	76000000	52600000	51800000	110100000	127800000	8.04179	8.10653	75771	124560
O95398	1	Rap guanine nucleotide exchange factor 3 OS=Homo sapiens GN=RAPGEF3 PE=1 SV=3 - [RPGF3_HUMAN]	O95398	S528	Rap guanine nucleotide exchange factor 3 (Exchange factor directly activated by cAMP 1) (Exchange protein directly activated by cAMP 1) (EPAC 1) (Rap1 guanine-nucleotide-exchange factor directly activated by cAMP) (cAMP-regulated guanine nucleotide exchange factor I) (cAMP-GEFI)	RAPGEF3 CGEF1 EPAC EPAC1	ENGCGNASPQMKARN	0.677	1.04384	-0.562772	0.0619024	0.685223	0.934238	-0.545355	-0.098138	1800000	9080000	1220000	8690000	3020000	17770000	6.48001	7.24969	7085	22197
O95398	1	Rap guanine nucleotide exchange factor 3 OS=Homo sapiens GN=RAPGEF3 PE=1 SV=3 - [RPGF3_HUMAN]	O95398	S864	Rap guanine nucleotide exchange factor 3 (Exchange factor directly activated by cAMP 1) (Exchange protein directly activated by cAMP 1) (EPAC 1) (Rap1 guanine-nucleotide-exchange factor directly activated by cAMP) (cAMP-regulated guanine nucleotide exchange factor I) (cAMP-GEFI)	RAPGEF3 CGEF1 EPAC EPAC1	SHNPVPLSPLRSRVS	0.795	0.94518	-0.330973	-0.0813396	0.804656	0.845936	-0.313556	-0.24138	10400000	8600000	8280000	9100000	18680000	17700000	7.27138	7.24797	40853	66282
O95400	1	CD2 antigen cytoplasmic tail-binding protein 2 OS=Homo sapiens GN=CD2BP2 PE=1 SV=1 - [CD2B2_HUMAN]	O95400	S195	CD2 antigen cytoplasmic tail-binding protein 2 (CD2 cytoplasmic domain-binding protein 2) (CD2 tail-binding protein 2)	CD2BP2 KIAA1178	KGPGQPSSPQRLDRL	0.92	0.974659	-0.120294	-0.0370307	0.931174	0.87232	-0.102877	-0.197071	922000000	536000000	848000000	550000000	1770000000	1086000000	9.24797	9.03583	49967	168385
O95402	1	Mediator of RNA polymerase II transcription subunit 26 OS=Homo sapiens GN=MED26 PE=1 SV=2 - [MED26_HUMAN]	O95402	S447	Mediator of RNA polymerase II transcription subunit 26 (Activator-recruited cofactor 70 kDa component) (ARC70) (Cofactor required for Sp1 transcriptional activation subunit 7) (CRSP complex subunit 7) (Mediator complex subunit 26) (Transcriptional coactivator CRSP70)	MED26 ARC70 CRSP7	KEPVRADSPVHMEQQ	1.238	1.0101	0.308011	0.0144996	1.25304	0.90404	0.325428	-0.145541	7060000	4310000	8730000	4260000	15790000	8570000	7.19838	6.93298	47170	161405	CMGC/CDK	CDK11, CDK8
O95425	1	Supervillin OS=Homo sapiens GN=SVIL PE=1 SV=1 - [SVIL_HUMAN]	O95425	S221	Supervillin (Archvillin) (p205/p250)	SVIL	TRQAHDLSPAAESSS	0.934	1.26743	-0.0985055	0.341903	0.945344	1.13435	-0.0810885	0.181862	205000000	50600000	191000000	39900000	396000000	90500000	8.5977	7.95665	80147	131892	CMGC/MAPK	Erk1
O95425	1	Supervillin OS=Homo sapiens GN=SVIL PE=1 SV=1 - [SVIL_HUMAN]	O95425	S245	Supervillin (Archvillin) (p205/p250)	SVIL	SFTEVPRSPKHAHSS	0.942	0.960615	-0.086201	-0.0579701	0.953441	0.85975	-0.068784	-0.21801	409000000	461000000	386000000	480000000	795000000	941000000	8.90037	8.97359	33187	127809	CMGC/MAPK	Erk1
O95425	1	Supervillin OS=Homo sapiens GN=SVIL PE=1 SV=1 - [SVIL_HUMAN]	O95425	S270	Supervillin (Archvillin) (p205/p250)	SVIL	SFGDPQLSPEARPST	1.112	1.7094	0.153157	0.773491	1.12551	1.52991	0.170574	0.613451	3840000	5420000	4270000	3170000	8110000	8590000	6.90902	6.93399	45858	162623	CMGC/MAPK	Erk1
O95425	1	Supervillin OS=Homo sapiens GN=SVIL PE=1 SV=1 - [SVIL_HUMAN]	O95425	S50	Supervillin (Archvillin) (p205/p250)	SVIL	MRASDPASPHIGRSN	0.536	0.60241	-0.899695	-0.731183	0.54251	0.539157	-0.882278	-0.891224	66200000	53000000	35500000	87900000	101700000	140900000	8.00732	8.14891	35334	133767	CMGC/MAPK	Erk1
O95425	1	Supervillin OS=Homo sapiens GN=SVIL PE=1 SV=1 - [SVIL_HUMAN]	O95425	S549	Supervillin (Archvillin) (p205/p250)	SVIL	KVRTRSLSDFTGPPQ	1.191	0.94518	0.252173	-0.0813396	1.20547	0.845936	0.26959	-0.24138	24800000	64300000	29500000	68000000	54300000	132300000	7.7348	8.12156	26621	21193
O95425	1	Supervillin OS=Homo sapiens GN=SVIL PE=1 SV=1 - [SVIL_HUMAN]	O95425	S673	Supervillin (Archvillin) (p205/p250)	SVIL	KESDRCTSHSETPTV	1.302	1.14548	0.380729	0.195946	1.31781	1.0252	0.398147	0.035906	34000000	14700000	44300000	12900000	78300000	27600000	7.89376	7.44091	74431	67983	AGC/AKT	AKT1
O95425	1	Supervillin OS=Homo sapiens GN=SVIL PE=1 SV=1 - [SVIL_HUMAN]	O95425	S707	Supervillin (Archvillin) (p205/p250)	SVIL	LFREMEKSFDEQNVP	1.276	1.32802	0.351628	0.409278	1.2915	1.18858	0.369045	0.249238	396000000	304000000	506000000	229000000	902000000	533000000	8.95521	8.72673	4322	115428	AGC/AKT	AKT1
O95425	1	Supervillin OS=Homo sapiens GN=SVIL PE=1 SV=1 - [SVIL_HUMAN]	O95425	S920	Supervillin (Archvillin) (p205/p250)	SVIL	SSIENSDSPVRSILK	0.473	0.988142	-1.08009	-0.0172093	0.478745	0.884387	-1.06267	-0.17725	7930000	16400000	3750000	16600000	11680000	33000000	7.06744	7.51851	9717	115231	CMGC/MAPK	Erk1
O95425	1	Supervillin OS=Homo sapiens GN=SVIL PE=1 SV=1 - [SVIL_HUMAN]	O95425	S968	Supervillin (Archvillin) (p205/p250)	SVIL	SGMEKYGSFEEAEAS	1.283	1.54321	0.359521	0.625934	1.29858	1.38117	0.376938	0.465894	38300000	24800000	49100000	16100000	87400000	40900000	7.94151	7.61172	6614	101801
O95425	1	Supervillin OS=Homo sapiens GN=SVIL PE=1 SV=1 - [SVIL_HUMAN]	O95425	T657	Supervillin (Archvillin) (p205/p250)	SVIL	KTSERFRTQPITSAE	0.917	1.04058	-0.125006	0.0573917	0.928138	0.931322	-0.107589	-0.102649	61800000	34000000	56700000	32700000	118500000	66700000	8.07372	7.82413	39734	59799	AGC/AKT	AKT1
O95425	1	Supervillin OS=Homo sapiens GN=SVIL PE=1 SV=1 - [SVIL_HUMAN]	O95425	T852	Supervillin (Archvillin) (p205/p250)	SVIL	RMNARYQTQPVTLGE	0.893	0.968054	-0.163268	-0.0468403	0.903846	0.866409	-0.145851	-0.206881	1810000000	958000000	1620000000	990000000	3430000000	1948000000	9.53529	9.28959	5847	29042	AGC/AKT	AKT1
O95453	1	Poly(A)-specific ribonuclease PARN OS=Homo sapiens GN=PARN PE=1 SV=1 - [PARN_HUMAN]	O95453	S619	Poly(A)-specific ribonuclease PARN (EC 3.1.13.4) (Deadenylating nuclease) (Deadenylation nuclease) (Polyadenylate-specific ribonuclease)	PARN DAN	KRMKKELSPAGSISK	1.281	0.95511	0.35727	-0.0662614	1.29656	0.854823	0.374688	-0.226302	349000000	215000000	447000000	225000000	796000000	440000000	8.90091	8.64345	4006	22849	CMGC/CDK/CDC2	CDC2
O95453	1	Poly(A)-specific ribonuclease PARN OS=Homo sapiens GN=PARN PE=1 SV=1 - [PARN_HUMAN]	O95453	S623	Poly(A)-specific ribonuclease PARN (EC 3.1.13.4) (Deadenylating nuclease) (Deadenylation nuclease) (Polyadenylate-specific ribonuclease)	PARN DAN	KELSPAGSISKNSPA	1.027	1.00402	0.0384362	0.00578235	1.03947	0.898594	0.0558532	-0.154258	6460000	16100000	6630000	16100000	13090000	32200000	7.11694	7.50786	20596	96698
O95490	1	Latrophilin-2 OS=Homo sapiens GN=LPHN2 PE=2 SV=2 - [LPHN2_HUMAN]	O95490	S1430	Latrophilin-2 (Calcium-independent alpha-latrotoxin receptor 2) (CIRL-2) (Latrophilin homolog 1) (Lectomedin-1)	LPHN2 KIAA0786 LEC1 LPHH1	YQISRGNSDGYIIPI	0.848	0.959693	-0.237864	-0.0593553	0.8583	0.858925	-0.220447	-0.219396	178000000	76200000	151000000	79400000	329000000	155600000	8.5172	8.19201	5883	118803
O95503	1	Chromobox protein homolog 6 OS=Homo sapiens GN=CBX6 PE=1 SV=1 - [CBX6_HUMAN]	O95503	S107	Chromobox protein homolog 6	CBX6	KPSASASSPKLHSSA	0.975	1.24224	-0.0365259	0.312939	0.986842	1.1118	-0.0191088	0.152899	11100000	12900000	10800000	10400000	21900000	23300000	7.34044	7.36736	45970	162842
O95544	1	NAD kinase OS=Homo sapiens GN=NADK PE=1 SV=1 - [NADK_HUMAN]	O95544	S46	NAD kinase (EC 2.7.1.23) (Poly(P)/ATP NAD kinase)	NADK	RGRAKSRSLSASPAL	1.145	0.829187	0.195348	-0.27023	1.15891	0.742123	0.212765	-0.43027	67000000	21300000	76800000	25700000	143800000	47000000	8.15776	7.6721	4402	109555
O95544	1	NAD kinase OS=Homo sapiens GN=NADK PE=1 SV=1 - [NADK_HUMAN]	O95544	S48	NAD kinase (EC 2.7.1.23) (Poly(P)/ATP NAD kinase)	NADK	RAKSRSLSASPALGS	1.145	1.21655	0.195348	0.28279	1.15891	1.08881	0.212765	0.122749	67000000	83600000	76800000	68700000	143800000	152300000	8.15776	8.1827	4402	27126
O95613	1	Pericentrin OS=Homo sapiens GN=PCNT PE=1 SV=3 - [PCNT_HUMAN]	O95613	S3242	Pericentrin (Kendrin) (Pericentrin-B)	PCNT KIAA0402 PCNT2	PRARQPQSPPRTRES	0.672	1.18343	-0.573467	0.242977	0.680162	1.05917	-0.55605	0.0829363	11300000	10700000	7610000	9060000	18910000	19760000	7.27669	7.29579	54347	140949
O95628	1	CCR4-NOT transcription complex subunit 4 OS=Homo sapiens GN=CNOT4 PE=1 SV=3 - [CNOT4_HUMAN]	O95628	S432	CCR4-NOT transcription complex subunit 4 (EC 6.3.2.-) (CCR4-associated factor 4) (E3 ubiquitin-protein ligase CNOT4) (Potential transcriptional repressor NOT4Hp)	CNOT4 NOT4	VQDQPSLSPTSLQNS	0.904	1.10254	-0.145605	0.140826	0.91498	0.98677	-0.128188	-0.0192149	144000000	69400000	130000000	63000000	274000000	132400000	8.43775	8.12189	33590	48349
O95639	1	Cleavage and polyadenylation specificity factor subunit 4 OS=Homo sapiens GN=CPSF4 PE=1 SV=1 - [CPSF4_HUMAN]	O95639	S202	Cleavage and polyadenylation specificity factor subunit 4 (Cleavage and polyadenylation specificity factor 30 kDa subunit) (CPSF 30 kDa subunit) (NS1 effector domain-binding protein 1) (Neb-1) (No arches homolog)	CPSF4 CPSF30 NAR NEB1	PPLQRSSSLIQLTSQ	1.374	0.514403	0.458382	-0.959028	1.39069	0.460391	0.475799	-1.11907	34800000	744000	47800000	1450000	82600000	2194000	7.91698	6.34124	5361	117370	CAMK/MAPKAPK	MAPKAPK2
O95671	1	N-acetylserotonin O-methyltransferase-like protein OS=Homo sapiens GN=ASMTL PE=1 SV=3 - [ASML_HUMAN]	O95671	S239	N-acetylserotonin O-methyltransferase-like protein (ASMTL)	ASMTL	ADTFEDLSDVEGGGS	1.036	1.10497	0.051024	0.14401	1.04858	0.98895	0.0684411	-0.0160301	193000000	56700000	200000000	51300000	393000000	108000000	8.59439	8.03342	38365	167113
O95674	1	Phosphatidate cytidylyltransferase 2 OS=Homo sapiens GN=CDS2 PE=1 SV=1 - [CDS2_HUMAN]	O95674	S21	Phosphatidate cytidylyltransferase 2 (EC 2.7.7.41) (CDP-DAG synthase 2) (CDP-DG synthase 2) (CDP-diacylglycerol synthase 2) (CDS 2) (CDP-diglyceride pyrophosphorylase 2) (CDP-diglyceride synthase 2) (CTP:phosphatidate cytidylyltransferase 2)	CDS2	APPEDKESESEAKVD	1.183	1.20919	0.24245	0.274041	1.19737	1.08222	0.259867	0.114	2980000	12700000	3530000	10500000	6510000	23200000	6.81358	7.36549	45349	161796
O95684	1	FGFR1 oncogene partner OS=Homo sapiens GN=FGFR1OP PE=1 SV=1 - [FR1OP_HUMAN]	O95684	S156	FGFR1 oncogene partner	FGFR1OP FOP	LDLSDVHSPPKSPEG	0.834	1.67224	-0.261881	0.741783	0.84413	1.49666	-0.244464	0.581742	38300000	1270000	32000000	759000	70300000	2029000	7.84696	6.30728	51199	82014	CMGC/CDK/CDC2	CDC2
O95684	1	FGFR1 oncogene partner OS=Homo sapiens GN=FGFR1OP PE=1 SV=1 - [FR1OP_HUMAN]	O95684	S160	FGFR1 oncogene partner	FGFR1OP FOP	DVHSPPKSPEGKTSA	0.983	0.996016	-0.0247367	-0.00575927	0.994939	0.891434	-0.00731963	-0.1658	34200000	22200000	33700000	22300000	67900000	44500000	7.83187	7.64836	43661	124958	CMGC/CDK/CDC2	CDC2
O95685	1	Protein phosphatase 1 regulatory subunit 3D OS=Homo sapiens GN=PPP1R3D PE=1 SV=1 - [PPR3D_HUMAN]	O95685	S25	Protein phosphatase 1 regulatory subunit 3D (Protein phosphatase 1 regulatory subunit 6) (PP1 subunit R6) (Protein phosphatase 1-binding subunit R6)	PPP1R3D PPP1R6	KLGPRSLSCLSDLDG	0.995	1.36799	-0.00723157	0.452057	1.00709	1.22435	0.0101855	0.292016	9020000	10300000	8980000	7500000	18000000	17800000	7.25527	7.25042	103206	21190	CAMK/CAMK2	CaMK2g
O95685	1	Protein phosphatase 1 regulatory subunit 3D OS=Homo sapiens GN=PPP1R3D PE=1 SV=1 - [PPR3D_HUMAN]	O95685	S74	Protein phosphatase 1 regulatory subunit 3D (Protein phosphatase 1 regulatory subunit 6) (PP1 subunit R6) (Protein phosphatase 1-binding subunit R6)	PPP1R3D PPP1R6	IILRRARSLPSSPER	1.425	1.16686	0.510962	0.222633	1.44231	1.04434	0.528379	0.0625925	112000000	13200000	160000000	11300000	272000000	24500000	8.43457	7.38917	42133	62387	CAMK/CAMK2	CaMK2g
O95685	1	Protein phosphatase 1 regulatory subunit 3D OS=Homo sapiens GN=PPP1R3D PE=1 SV=1 - [PPR3D_HUMAN]	O95685	S78	Protein phosphatase 1 regulatory subunit 3D (Protein phosphatase 1 regulatory subunit 6) (PP1 subunit R6) (Protein phosphatase 1-binding subunit R6)	PPP1R3D PPP1R6	RARSLPSSPERRQKA	1.425	1.16686	0.510962	0.222633	1.44231	1.04434	0.528379	0.0625925	112000000	13200000	160000000	11300000	272000000	24500000	8.43457	7.38917	42133	62387	CMGC/CDK	CDK5
O95714	1	Probable E3 ubiquitin-protein ligase HERC2 OS=Homo sapiens GN=HERC2 PE=1 SV=1 - [HERC2_HUMAN]	O95714	S2928	E3 ubiquitin-protein ligase HERC2 (EC 6.3.2.-) (HECT domain and RCC1-like domain-containing protein 2)	HERC2	AAVPFLASDNEEEED	0.964	1.37931	-0.0528949	0.463947	0.975709	1.23448	-0.0354779	0.303907	46100000	46800000	44400000	33900000	90500000	80700000	7.95665	7.90687	38557	136180
O95747	1	Serine/threonine-protein kinase OSR1 OS=Homo sapiens GN=OXSR1 PE=1 SV=1 - [OXSR1_HUMAN]	O95747	S339	Serine/threonine-protein kinase OSR1 (EC 2.7.11.1) (Oxidative stress-responsive 1 protein)	OXSR1 KIAA1101 OSR1	EDGGWEWSDDEFDEE	0.892	1.28041	-0.164884	0.356606	0.902834	1.14597	-0.147467	0.196565	90300000	101000000	80600000	78500000	170900000	179500000	8.23274	8.25406	26404	15563
O95766	1	UPF0550 protein C7orf28 OS=Homo sapiens GN=C7orf28A PE=1 SV=1 - [CG028_HUMAN]	O95766	S266	Replaced by: P86790;P86791 = Vacuolar fusion protein CCZ1 homolog B (Vacuolar fusion protein CCZ1 homolog-like) | Vacuolar fusion protein CCZ1 homolog	CCZ1B C7orf28B | CCZ1 C7orf28A CGI-43	PELAGRDSPIRAEMP	0.946	1.69779	-0.0800879	0.76366	0.95749	1.51952	-0.0626709	0.60362	4880000	6300000	4620000	3710000	9500000	10010000	6.97772	7.00043	50898	169731
O95772	1	MLN64 N-terminal domain homolog OS=Homo sapiens GN=STARD3NL PE=1 SV=1 - [MENTO_HUMAN]	O95772	S193	MLN64 N-terminal domain homolog (STARD3 N-terminal-like protein)	STARD3NL MENTHO UNQ855/PRO1864	LLIVQDASERAALIP	1.072	1.20192	0.100305	0.265345	1.08502	1.07572	0.117722	0.105304	381000000	219000000	408000000	182000000	789000000	401000000	8.89708	8.60314	5190	117652
O95772	1	MLN64 N-terminal domain homolog OS=Homo sapiens GN=STARD3NL PE=1 SV=1 - [MENTO_HUMAN]	O95772	S39	MLN64 N-terminal domain homolog (STARD3 N-terminal-like protein)	STARD3NL MENTHO UNQ855/PRO1864	QLMARIESYEGREKK	0.908	1.37931	-0.139236	0.463947	0.919028	1.23448	-0.121819	0.303907	69800000	37100000	63400000	26900000	133200000	64000000	8.1245	7.80618	39240	143754
O95785	1	Protein Wiz OS=Homo sapiens GN=WIZ PE=1 SV=2 - [WIZ_HUMAN]	O95785	S1017	Protein Wiz (Widely-interspaced zinc finger-containing protein) (Zinc finger protein 803)	WIZ ZNF803	SLSPRPASPKAQWPQ	1.006	1.1274	0.00863031	0.172994	1.01822	1.00902	0.0260474	0.0129536	76300000	185000000	76700000	164000000	153000000	349000000	8.18469	8.54283	37034	51728
O95785	1	Protein Wiz OS=Homo sapiens GN=WIZ PE=1 SV=2 - [WIZ_HUMAN]	O95785	S996	Protein Wiz (Widely-interspaced zinc finger-containing protein) (Zinc finger protein 803)	WIZ ZNF803	TPLALAGSPTPKNPE	1.317	1.27551	0.397255	0.351074	1.333	1.14158	0.414672	0.191034	10300000	14700000	13500000	11500000	23800000	26200000	7.37658	7.4183	40699	60809
O95793	1	Double-stranded RNA-binding protein Staufen homolog 1 OS=Homo sapiens GN=STAU1 PE=1 SV=2 - [STAU1_HUMAN]	O95793	S390	Double-stranded RNA-binding protein Staufen homolog 1	STAU1 STAU	VTFFEPGSGDENGTS	2.334	1.41044	1.2228	0.496142	2.36235	1.26234	1.24022	0.336102	3110000	17000000	7250000	12100000	10360000	29100000	7.01536	7.46389	38359	126020
O95810	1	Serum deprivation-response protein OS=Homo sapiens GN=SDPR PE=1 SV=3 - [SDPR_HUMAN]	O95810	S247	Serum deprivation-response protein (Cavin-2) (PS-p68) (Phosphatidylserine-binding protein)	SDPR	DSLKKAFSRQNIEKK	0.669	0.565611	-0.579922	-0.822118	0.677126	0.506222	-0.562505	-0.982159	656000000	225000000	439000000	397000000	1095000000	622000000	9.03941	8.79379	81709	159367
O95810	1	Serum deprivation-response protein OS=Homo sapiens GN=SDPR PE=1 SV=3 - [SDPR_HUMAN]	O95810	S27	Serum deprivation-response protein (Cavin-2) (PS-p68) (Phosphatidylserine-binding protein)	SDPR	QEKPSSPSPMPSSTP	1.047	1.20482	0.0662614	0.268817	1.05972	1.07831	0.0836785	0.108776	191000000	373000000	201000000	309000000	392000000	682000000	8.59329	8.83378	76324	48693
O95810	1	Serum deprivation-response protein OS=Homo sapiens GN=SDPR PE=1 SV=3 - [SDPR_HUMAN]	O95810	S287	Serum deprivation-response protein (Cavin-2) (PS-p68) (Phosphatidylserine-binding protein)	SDPR	QKISSGKSSPFKVSP	0.942	1.06383	-0.086201	0.0892673	0.953441	0.952128	-0.068784	-0.0707731	3510000000	19400000	3300000000	18200000	6810000000	37600000	9.83315	7.57519	6624	148984
O95810	1	Serum deprivation-response protein OS=Homo sapiens GN=SDPR PE=1 SV=3 - [SDPR_HUMAN]	O95810	S288	Serum deprivation-response protein (Cavin-2) (PS-p68) (Phosphatidylserine-binding protein)	SDPR	KISSGKSSPFKVSPL	0.841	0.731529	-0.249822	-0.451013	0.851215	0.654718	-0.232405	-0.611054	85800000	42200000	72200000	57700000	158000000	99900000	8.19866	7.99957	77751	163715
O95810	1	Serum deprivation-response protein OS=Homo sapiens GN=SDPR PE=1 SV=3 - [SDPR_HUMAN]	O95810	S293	Serum deprivation-response protein (Cavin-2) (PS-p68) (Phosphatidylserine-binding protein)	SDPR	KSSPFKVSPLTFGRK	0.995	1.12108	-0.00723157	0.164884	1.00709	1.00336	0.0101855	0.00484397	453000000	1540000000	451000000	1380000000	904000000	2920000000	8.95617	9.46538	38467	56218
O95810	1	Serum deprivation-response protein OS=Homo sapiens GN=SDPR PE=1 SV=3 - [SDPR_HUMAN]	O95810	S370	Serum deprivation-response protein (Cavin-2) (PS-p68) (Phosphatidylserine-binding protein)	SDPR	GSNSGMDSNIDLTIV	0.823	1.1274	-0.281036	0.172994	0.832996	1.00902	-0.263619	0.0129536	32500000	34100000	26700000	30300000	59200000	64400000	7.77232	7.80889	26624	21253
O95810	1	Serum deprivation-response protein OS=Homo sapiens GN=SDPR PE=1 SV=3 - [SDPR_HUMAN]	O95810	T296	Serum deprivation-response protein (Cavin-2) (PS-p68) (Phosphatidylserine-binding protein)	SDPR	PFKVSPLTFGRKKVR	1.037	0.625391	0.0524159	-0.67717	1.0496	0.559725	0.0698329	-0.83721	5850000	119000	6060000	191000	11910000	310000	7.07591	5.49136	46916	119389
O95816	1	BAG family molecular chaperone regulator 2 OS=Homo sapiens GN=BAG2 PE=1 SV=1 - [BAG2_HUMAN]	O95816	S73	BAG family molecular chaperone regulator 2 (BAG-2) (Bcl-2-associated athanogene 2)	BAG2	SQDMRQISDGEREEL	0.911	1.23916	-0.134477	0.309359	0.922065	1.10905	-0.11706	0.149319	63000000	32800000	57400000	26500000	120400000	59300000	8.08063	7.77305	37217	52177	CAMK/MAPKAPK	MAPKAPK2
O95817	1	BAG family molecular chaperone regulator 3 OS=Homo sapiens GN=BAG3 PE=1 SV=3 - [BAG3_HUMAN]	O95817	S136	BAG family molecular chaperone regulator 3 (BAG-3) (Bcl-2-associated athanogene 3) (Bcl-2-binding protein Bis) (Docking protein CAIR-1)	BAG3 BIS	AAPQRSQSPLRGMPE	0.574	0.693963	-0.800877	-0.52707	0.580972	0.621096	-0.78346	-0.687111	37700000	9190000	21700000	13300000	59400000	22490000	7.77379	7.35199	75282	127415	Atypical/PIKK/FRAP	FRAP
O95817	1	BAG family molecular chaperone regulator 3 OS=Homo sapiens GN=BAG3 PE=1 SV=3 - [BAG3_HUMAN]	O95817	S173	BAG family molecular chaperone regulator 3 (BAG-3) (Bcl-2-associated athanogene 3) (Bcl-2-binding protein Bis) (Docking protein CAIR-1)	BAG3 BIS	HGPERSQSPAASDCS	0.942	1.02564	-0.086201	0.0365259	0.953441	0.917949	-0.068784	-0.123515	815000000	17000000	768000000	16600000	1583000000	33600000	9.19948	7.52634	3237	99602	Atypical/PIKK/FRAP	FRAP
O95817	1	BAG family molecular chaperone regulator 3 OS=Homo sapiens GN=BAG3 PE=1 SV=3 - [BAG3_HUMAN]	O95817	S274	BAG family molecular chaperone regulator 3 (BAG-3) (Bcl-2-associated athanogene 3) (Bcl-2-binding protein Bis) (Docking protein CAIR-1)	BAG3 BIS	RSSVQGASSREGSPA	0.937	1.05932	-0.093879	0.0831412	0.948381	0.948093	-0.076462	-0.0768992	3630000	28700000	3400000	27100000	7030000	55800000	6.84696	7.74663	68932	107892
O95817	1	BAG family molecular chaperone regulator 3 OS=Homo sapiens GN=BAG3 PE=1 SV=3 - [BAG3_HUMAN]	O95817	S275	BAG family molecular chaperone regulator 3 (BAG-3) (Bcl-2-associated athanogene 3) (Bcl-2-binding protein Bis) (Docking protein CAIR-1)	BAG3 BIS	SSVQGASSREGSPAR	1.158	1.5015	0.211635	0.586406	1.17206	1.34384	0.229052	0.426366	65800000	13000000	76200000	8630000	142000000	21630000	8.15229	7.33506	77432	136898	CAMK/RAD53	CHK2
O95817	1	BAG family molecular chaperone regulator 3 OS=Homo sapiens GN=BAG3 PE=1 SV=3 - [BAG3_HUMAN]	O95817	S279	BAG family molecular chaperone regulator 3 (BAG-3) (Bcl-2-associated athanogene 3) (Bcl-2-binding protein Bis) (Docking protein CAIR-1)	BAG3 BIS	GASSREGSPARSSTP	1.005	1.12613	0.0071955	0.171368	1.01721	1.00788	0.0246126	0.011328	16100000	31000000	16200000	27500000	32300000	58500000	7.5092	7.76716	69035	31008	Atypical/PIKK/FRAP	FRAP
O95817	1	BAG family molecular chaperone regulator 3 OS=Homo sapiens GN=BAG3 PE=1 SV=3 - [BAG3_HUMAN]	O95817	S289	BAG family molecular chaperone regulator 3 (BAG-3) (Bcl-2-associated athanogene 3) (Bcl-2-binding protein Bis) (Docking protein CAIR-1)	BAG3 BIS	RSSTPLHSPSPIRVH	1.081	1.10011	0.112367	0.137648	1.09413	0.984598	0.129784	-0.0223926	85200000	108000000	92200000	98200000	177400000	206200000	8.24895	8.31429	35866	50939	Atypical/PIKK/FRAP	FRAP
O95817	1	BAG family molecular chaperone regulator 3 OS=Homo sapiens GN=BAG3 PE=1 SV=3 - [BAG3_HUMAN]	O95817	S377	BAG family molecular chaperone regulator 3 (BAG-3) (Bcl-2-associated athanogene 3) (Bcl-2-binding protein Bis) (Docking protein CAIR-1)	BAG3 BIS	PVPCPPPSPGPSAVP	1.221	1.18624	0.288063	0.246395	1.23583	1.06168	0.30548	0.0863551	8450000	117000000	10300000	98900000	18750000	215900000	7.273	8.33425	70991	23863	Atypical/PIKK/FRAP	FRAP
O95817	1	BAG family molecular chaperone regulator 3 OS=Homo sapiens GN=BAG3 PE=1 SV=3 - [BAG3_HUMAN]	O95817	T285	BAG family molecular chaperone regulator 3 (BAG-3) (Bcl-2-associated athanogene 3) (Bcl-2-binding protein Bis) (Docking protein CAIR-1)	BAG3 BIS	GSPARSSTPLHSPSP	0.63	1.03413	-0.666576	0.0484122	0.637652	0.925543	-0.649159	-0.111628	25200000	83200000	15900000	80500000	41100000	163700000	7.61384	8.21405	36148	54254	Atypical/PIKK/FRAP	FRAP
O95819	1	Mitogen-activated protein kinase kinase kinase kinase 4 OS=Homo sapiens GN=MAP4K4 PE=1 SV=2 - [M4K4_HUMAN]	O95819	S629	Mitogen-activated protein kinase kinase kinase kinase 4 (EC 2.7.11.1) (HPK/GCK-like kinase HGK) (MAPK/ERK kinase kinase kinase 4) (MEK kinase kinase 4) (MEKKK 4) (Nck-interacting kinase)	MAP4K4 HGK KIAA0687 NIK	QVPVRTTSRSPVLSR	1.004	1.16959	0.00575927	0.226004	1.01619	1.04678	0.0231763	0.0659633	123000000	20800000	124000000	17700000	247000000	38500000	8.3927	7.58546	103771	65319
O95819	1	Mitogen-activated protein kinase kinase kinase kinase 4 OS=Homo sapiens GN=MAP4K4 PE=1 SV=2 - [M4K4_HUMAN]	O95819	S631	Mitogen-activated protein kinase kinase kinase kinase 4 (EC 2.7.11.1) (HPK/GCK-like kinase HGK) (MAPK/ERK kinase kinase kinase 4) (MEK kinase kinase 4) (MEKKK 4) (Nck-interacting kinase)	MAP4K4 HGK KIAA0687 NIK	PVRTTSRSPVLSRRD	0.876	1.09409	-0.190997	0.129734	0.88664	0.979212	-0.17358	-0.0303065	287000000	166000000	252000000	151000000	539000000	317000000	8.73159	8.50106	52362	59578	STE/STE11	MAP3K1
O95819	1	Mitogen-activated protein kinase kinase kinase kinase 4 OS=Homo sapiens GN=MAP4K4 PE=1 SV=2 - [M4K4_HUMAN]	O95819	S639	Mitogen-activated protein kinase kinase kinase kinase 4 (EC 2.7.11.1) (HPK/GCK-like kinase HGK) (MAPK/ERK kinase kinase kinase 4) (MEK kinase kinase 4) (MEKKK 4) (Nck-interacting kinase)	MAP4K4 HGK KIAA0687 NIK	PVLSRRDSPLQGSGQ	0.995	0.94697	-0.00723157	-0.0786098	1.00709	0.847538	0.0101855	-0.23865	72900000	32600000	72600000	34500000	145500000	67100000	8.16286	7.82672	39380	59489
O95819	1	Mitogen-activated protein kinase kinase kinase kinase 4 OS=Homo sapiens GN=MAP4K4 PE=1 SV=2 - [M4K4_HUMAN]	O95819	S710	Mitogen-activated protein kinase kinase kinase kinase 4 (EC 2.7.11.1) (HPK/GCK-like kinase HGK) (MAPK/ERK kinase kinase kinase 4) (MEK kinase kinase 4) (MEKKK 4) (Nck-interacting kinase)	MAP4K4 HGK KIAA0687 NIK	RFRVRSSSKSEGSPS	0.872	1.2837	-0.1976	0.360305	0.882591	1.14891	-0.180183	0.200264	14900000	19600000	13000000	15300000	27900000	34900000	7.4456	7.54283	45655	130878
O95819	1	Mitogen-activated protein kinase kinase kinase kinase 4 OS=Homo sapiens GN=MAP4K4 PE=1 SV=2 - [M4K4_HUMAN]	O95819	S715	Mitogen-activated protein kinase kinase kinase kinase 4 (EC 2.7.11.1) (HPK/GCK-like kinase HGK) (MAPK/ERK kinase kinase kinase 4) (MEK kinase kinase 4) (MEKKK 4) (Nck-interacting kinase)	MAP4K4 HGK KIAA0687 NIK	SSSKSEGSPSQRLEN	0.7	0.821693	-0.514573	-0.283329	0.708502	0.735415	-0.497156	-0.44337	235000000	140000000	164000000	171000000	399000000	311000000	8.60097	8.49276	36387	51414
O95819	1	Mitogen-activated protein kinase kinase kinase kinase 4 OS=Homo sapiens GN=MAP4K4 PE=1 SV=2 - [M4K4_HUMAN]	O95819	S800	Mitogen-activated protein kinase kinase kinase kinase 4 (EC 2.7.11.1) (HPK/GCK-like kinase HGK) (MAPK/ERK kinase kinase kinase 4) (MEK kinase kinase 4) (MEKKK 4) (Nck-interacting kinase)	MAP4K4 HGK KIAA0687 NIK	PEDTRAASSLNLSNG	0.264	0.616143	-1.92139	-0.698663	0.267206	0.551448	-1.90397	-0.858703	57700000	19900000	15200000	32300000	72900000	52200000	7.86273	7.71767	4714	27467
O95819	1	Mitogen-activated protein kinase kinase kinase kinase 4 OS=Homo sapiens GN=MAP4K4 PE=1 SV=2 - [M4K4_HUMAN]	O95819	S811	Mitogen-activated protein kinase kinase kinase kinase 4 (EC 2.7.11.1) (HPK/GCK-like kinase HGK) (MAPK/ERK kinase kinase kinase 4) (MEK kinase kinase 4) (MEKKK 4) (Nck-interacting kinase)	MAP4K4 HGK KIAA0687 NIK	LSNGETESVKTMIVH	0.452	0.875657	-1.14561	-0.191563	0.45749	0.783713	-1.12819	-0.351603	5130000	7620000	2320000	8700000	7450000	16320000	6.87216	7.21272	105120	115928
O95819	1	Mitogen-activated protein kinase kinase kinase kinase 4 OS=Homo sapiens GN=MAP4K4 PE=1 SV=2 - [M4K4_HUMAN]	O95819	S842	Mitogen-activated protein kinase kinase kinase kinase 4 (EC 2.7.11.1) (HPK/GCK-like kinase HGK) (MAPK/ERK kinase kinase kinase 4) (MEK kinase kinase 4) (MEKKK 4) (Nck-interacting kinase)	MAP4K4 HGK KIAA0687 NIK	LIVRQTQSASSTLQK	0.396	0.487567	-1.33643	-1.03633	0.40081	0.436373	-1.31901	-1.19637	58100000	52100000	23000000	107000000	81100000	159100000	7.90902	8.20167	103574	112437	STE/STE11	MAP3K1
O95819	1	Mitogen-activated protein kinase kinase kinase kinase 4 OS=Homo sapiens GN=MAP4K4 PE=1 SV=2 - [M4K4_HUMAN]	O95819	S852	Mitogen-activated protein kinase kinase kinase kinase 4 (EC 2.7.11.1) (HPK/GCK-like kinase HGK) (MAPK/ERK kinase kinase kinase 4) (MEK kinase kinase 4) (MEKKK 4) (Nck-interacting kinase)	MAP4K4 HGK KIAA0687 NIK	STLQKHKSSSSFTPF	0.942	1.51976	-0.086201	0.603841	0.953441	1.36018	-0.068784	0.4438	5850000	8730000	5510000	5740000	11360000	14470000	7.05538	7.16047	51561	79645	TKL/MLK	TAK1
O95831	1	Apoptosis-inducing factor 1, mitochondrial OS=Homo sapiens GN=AIFM1 PE=1 SV=1 - [AIFM1_HUMAN]	O95831	S266	Apoptosis-inducing factor 1, mitochondrial (EC 1.-.-.-) (Programmed cell death protein 8)	AIFM1 AIF PDCD8	ATGGTPRSLSAIDRA	1.012	1.09529	0.0172093	0.131313	1.02429	0.980285	0.0346263	-0.0287272	112000000	37300000	113000000	34100000	225000000	71400000	8.35218	7.8537	4533	23409
O95831	1	Apoptosis-inducing factor 1, mitochondrial OS=Homo sapiens GN=AIFM1 PE=1 SV=1 - [AIFM1_HUMAN]	O95831	S268	Apoptosis-inducing factor 1, mitochondrial (EC 1.-.-.-) (Programmed cell death protein 8)	AIFM1 AIF PDCD8	GGTPRSLSAIDRAGA	1.012	1.08814	0.0172093	0.121863	1.02429	0.973885	0.0346263	-0.0381772	112000000	54100000	113000000	49700000	225000000	103800000	8.35218	8.0162	4533	116089	TKL/STKR	TGFbR2
O95835	1	Serine/threonine-protein kinase LATS1 OS=Homo sapiens GN=LATS1 PE=1 SV=1 - [LATS1_HUMAN]	O95835	S464	Serine/threonine-protein kinase LATS1 (EC 2.7.11.1) (Large tumor suppressor homolog 1) (WARTS protein kinase) (h-warts)	LATS1 WARTS	NIPVRSNSFNNPLGN	0.878	0.819001	-0.187707	-0.288063	0.888664	0.733006	-0.17029	-0.448104	12400000	35600000	10900000	43500000	23300000	79100000	7.36736	7.89818	11194	27843	TKL/STKR	BMPR2
O95835	1	Serine/threonine-protein kinase LATS1 OS=Homo sapiens GN=LATS1 PE=1 SV=1 - [LATS1_HUMAN]	O95835	S613	Serine/threonine-protein kinase LATS1 (EC 2.7.11.1) (Large tumor suppressor homolog 1) (WARTS protein kinase) (h-warts)	LATS1 WARTS	EKKQITTSPITVRKN	0.797	1.18765	-0.327348	0.248108	0.80668	1.06295	-0.309931	0.0880674	19000000	29200000	15100000	24600000	34100000	53800000	7.53275	7.73078	47920	169394	CMGC/CDK/CDC2	CDC2
O95835	1	Serine/threonine-protein kinase LATS1 OS=Homo sapiens GN=LATS1 PE=1 SV=1 - [LATS1_HUMAN]	O95835	T246	Serine/threonine-protein kinase LATS1 (EC 2.7.11.1) (Large tumor suppressor homolog 1) (WARTS protein kinase) (h-warts)	LATS1 WARTS	PPQVRSVTPPPPPRG	0.711	1.01523	-0.492079	0.0218044	0.719636	0.908629	-0.474661	-0.138236	6250000	35600000	4440000	35000000	10690000	70600000	7.02898	7.8488	3538	113695	CMGC/CDK/CDC2	CDC2
O95835	1	Serine/threonine-protein kinase LATS1 OS=Homo sapiens GN=LATS1 PE=1 SV=1 - [LATS1_HUMAN]	O95835	T616	Serine/threonine-protein kinase LATS1 (EC 2.7.11.1) (Large tumor suppressor homolog 1) (WARTS protein kinase) (h-warts)	LATS1 WARTS	QITTSPITVRKNKKD	0.821	1.11483	-0.284546	0.15682	0.830972	0.99777	-0.267129	-0.0032203	11000000	16600000	9010000	14900000	20010000	31500000	7.30125	7.49831	89501	60252
O95983	1	Methyl-CpG-binding domain protein 3 OS=Homo sapiens GN=MBD3 PE=1 SV=1 - [MBD3_HUMAN]	O95983	S85	Methyl-CpG-binding domain protein 3 (Methyl-CpG-binding protein MBD3)	MBD3	RQRVRYDSSNQVKGK	1.296	1.0101	0.374066	0.0144996	1.31174	0.90404	0.391483	-0.145541	5990000	5650000	7760000	5600000	13750000	11250000	7.1383	7.05115	81447	56986
O96013	1	Serine/threonine-protein kinase PAK 4 OS=Homo sapiens GN=PAK4 PE=1 SV=1 - [PAK4_HUMAN]	O96013	S104	Serine/threonine-protein kinase PAK 4 (EC 2.7.11.1) (p21-activated kinase 4) (PAK-4)	PAK4 KIAA1142	SNSLRRDSPPPPARA	0.805	1.07181	-0.312939	0.100051	0.814777	0.959271	-0.295522	-0.0599894	147000000	159000000	118000000	149000000	265000000	308000000	8.42325	8.48855	49733	77643	Atypical/PIKK/FRAP	FRAP
O96013	1	Serine/threonine-protein kinase PAK 4 OS=Homo sapiens GN=PAK4 PE=1 SV=1 - [PAK4_HUMAN]	O96013	S181	Serine/threonine-protein kinase PAK 4 (EC 2.7.11.1) (p21-activated kinase 4) (PAK-4)	PAK4 KIAA1142	SRDKRPLSGPDVGTP	0.905	1.01626	-0.14401	0.0232698	0.915992	0.909553	-0.126593	-0.136771	494000000	266000000	448000000	261000000	942000000	527000000	8.97405	8.72181	43404	66255	AGC	PKN1, PKN2
O96013	1	Serine/threonine-protein kinase PAK 4 OS=Homo sapiens GN=PAK4 PE=1 SV=1 - [PAK4_HUMAN]	O96013	S474	Serine/threonine-protein kinase PAK 4 (EC 2.7.11.1) (p21-activated kinase 4) (PAK-4)	PAK4 KIAA1142	KEVPRRKSLVGTPYW	0.995	1.02987	-0.00723157	0.0424568	1.00709	0.92173	0.0101855	-0.117584	13000000	81200000	13000000	78900000	26000000	160100000	7.41497	8.20439	26866	15755	Other/NEK	NEK2, NEK3, NEK6, NEK7
O96013	1	Serine/threonine-protein kinase PAK 4 OS=Homo sapiens GN=PAK4 PE=1 SV=1 - [PAK4_HUMAN]	O96013	S99	Serine/threonine-protein kinase PAK 4 (EC 2.7.11.1) (p21-activated kinase 4) (PAK-4)	PAK4 KIAA1142	MSVTRSNSLRRDSPP	0.806	0.928505	-0.311148	-0.107018	0.815789	0.831012	-0.293731	-0.267059	45900000	30600000	37000000	33000000	82900000	63600000	7.91855	7.80346	81403	59534	CAMK/CAMK2	CaMK2g
O96013	1	Serine/threonine-protein kinase PAK 4 OS=Homo sapiens GN=PAK4 PE=1 SV=1 - [PAK4_HUMAN]	O96013	T187	Serine/threonine-protein kinase PAK 4 (EC 2.7.11.1) (p21-activated kinase 4) (PAK-4)	PAK4 KIAA1142	LSGPDVGTPQPAGLA	0.892	1.01626	-0.164884	0.0232698	0.902834	0.909553	-0.147467	-0.136771	347000000	266000000	310000000	261000000	657000000	527000000	8.81757	8.72181	85338	66255	Atypical/PIKK/FRAP	FRAP
O96013	1	Serine/threonine-protein kinase PAK 4 OS=Homo sapiens GN=PAK4 PE=1 SV=1 - [PAK4_HUMAN]	O96013	T207	Serine/threonine-protein kinase PAK 4 (EC 2.7.11.1) (p21-activated kinase 4) (PAK-4)	PAK4 KIAA1142	AAGRPFNTYPRADTD	0.926	1.04058	-0.110916	0.0573917	0.937247	0.931322	-0.0934988	-0.102649	193000000	437000000	179000000	420000000	372000000	857000000	8.57054	8.93298	40782	60891
O96013	1	Serine/threonine-protein kinase PAK 4 OS=Homo sapiens GN=PAK4 PE=1 SV=1 - [PAK4_HUMAN]	O96013	T478	Serine/threonine-protein kinase PAK 4 (EC 2.7.11.1) (p21-activated kinase 4) (PAK-4)	PAK4 KIAA1142	RRKSLVGTPYWMAPE	0.981	1.07411	-0.027675	0.103147	0.992915	0.961332	-0.0102579	-0.0568935	18700000	54000000	18400000	50300000	37100000	104300000	7.56937	8.01828	26638	101943	CAMK/RAD53	CHK2
O96013	1	Serine/threonine-protein kinase PAK 4 OS=Homo sapiens GN=PAK4 PE=1 SV=1 - [PAK4_HUMAN]	O96013	Y480	Serine/threonine-protein kinase PAK 4 (EC 2.7.11.1) (p21-activated kinase 4) (PAK-4)	PAK4 KIAA1142	KSLVGTPYWMAPELI	1.022	1.13379	0.0313952	0.181149	1.03441	1.01474	0.0488122	0.021109	8430000	10500000	8620000	9270000	17050000	19770000	7.23172	7.29601	98674	11516	TK/FGFR	FGFR2
O96019	1	Actin-like protein 6A OS=Homo sapiens GN=ACTL6A PE=1 SV=1 - [ACL6A_HUMAN]	O96019	S233	Actin-like protein 6A (53 kDa BRG1-associated factor A) (Actin-related protein Baf53a) (ArpNbeta) (BRG1-associated factor 53A) (BAF53A) (INO80 complex subunit K)	ACTL6A BAF53 BAF53A INO80K	KEAVREGSPANWKRK	0.932	1.27714	-0.101598	0.352916	0.94332	1.14304	-0.0841811	0.192875	160000000	87700000	149000000	68700000	309000000	156400000	8.48996	8.19424	40066	144545	CMGC/CDK	CDK5
P00491	1	Purine nucleoside phosphorylase OS=Homo sapiens GN=NP PE=1 SV=2 - [PNPH_HUMAN]	P00491	T169	Purine nucleoside phosphorylase (PNP) (EC 2.4.2.1) (Inosine phosphorylase)	PNP NP	MSDAYDRTMRQRALS	1.347	1.02459	0.42975	0.0350469	1.36336	0.917008	0.447167	-0.124993	11100000	22900000	14900000	22400000	26000000	45300000	7.41497	7.6561	51042	79076
P00519	1	Proto-oncogene tyrosine-protein kinase ABL1 OS=Homo sapiens GN=ABL1 PE=1 SV=4 - [ABL1_HUMAN]	P00519	S569	Tyrosine-protein kinase ABL1 (EC 2.7.10.2) (Abelson murine leukemia viral oncogene homolog 1) (Abelson tyrosine-protein kinase 1) (Proto-oncogene c-Abl) (p150)	ABL1 ABL JTK7	LDHEPAVSPLLPRKE	0.773	0.981354	-0.37146	-0.0271541	0.782389	0.878312	-0.354043	-0.187194	40300000	99800000	31100000	102000000	71400000	201800000	7.8537	8.30492	44317	125999	CMGC/CDK/CDC2	CDC2
P00519	1	Proto-oncogene tyrosine-protein kinase ABL1 OS=Homo sapiens GN=ABL1 PE=1 SV=4 - [ABL1_HUMAN]	P00519	S620	Tyrosine-protein kinase ABL1 (EC 2.7.10.2) (Abelson murine leukemia viral oncogene homolog 1) (Abelson tyrosine-protein kinase 1) (Proto-oncogene c-Abl) (p150)	ABL1 ABL JTK7	TPPKRSSSFREMDGQ	1.237	0.974659	0.306846	-0.0370307	1.25202	0.87232	0.324263	-0.197071	9910000	4750000	12300000	4870000	22210000	9620000	7.34655	6.98318	52361	168383	STE/STE20	HPK1, KHS1, PAK2
P00519	1	Proto-oncogene tyrosine-protein kinase ABL1 OS=Homo sapiens GN=ABL1 PE=1 SV=4 - [ABL1_HUMAN]	P00519	S683	Tyrosine-protein kinase ABL1 (EC 2.7.10.2) (Abelson murine leukemia viral oncogene homolog 1) (Abelson tyrosine-protein kinase 1) (Proto-oncogene c-Abl) (p150)	ABL1 ABL JTK7	SGGSGFRSPHLWKKS	0.604	0.862813	-0.72738	-0.212881	0.611336	0.772217	-0.709962	-0.372921	22400000	21800000	13500000	25300000	35900000	47100000	7.55509	7.67302	51421	79461	CMGC/CDK/CDC2	CDC2
P00519	1	Proto-oncogene tyrosine-protein kinase ABL1 OS=Homo sapiens GN=ABL1 PE=1 SV=4 - [ABL1_HUMAN]	P00519	S718	Tyrosine-protein kinase ABL1 (EC 2.7.10.2) (Abelson murine leukemia viral oncogene homolog 1) (Abelson tyrosine-protein kinase 1) (Proto-oncogene c-Abl) (p150)	ABL1 ABL JTK7	KRFLRSCSASCVPHG	1.632	1.15075	0.706641	0.202572	1.65182	1.02992	0.724058	0.0425315	10700000	10600000	17400000	9250000	28100000	19850000	7.44871	7.29776	39184	59522
P00519	1	Proto-oncogene tyrosine-protein kinase ABL1 OS=Homo sapiens GN=ABL1 PE=1 SV=4 - [ABL1_HUMAN]	P00519	T781	Tyrosine-protein kinase ABL1 (EC 2.7.10.2) (Abelson murine leukemia viral oncogene homolog 1) (Abelson tyrosine-protein kinase 1) (Proto-oncogene c-Abl) (p150)	ABL1 ABL JTK7	QVTRGTVTPPPRLVK	1.088	0.878735	0.121679	-0.186501	1.10121	0.786467	0.139096	-0.346541	1580000	21200000	1720000	24100000	3300000	45300000	6.51851	7.6561	7459	108200	Atypical/PIKK/FRAP	FRAP
P00558	1	Phosphoglycerate kinase 1 OS=Homo sapiens GN=PGK1 PE=1 SV=3 - [PGK1_HUMAN]	P00558	S203	Phosphoglycerate kinase 1 (EC 2.7.2.3) (Cell migration-inducing gene 10 protein) (Primer recognition protein 2) (PRP 2)	PGK1 PGKA MIG10 OK/SW-cl.110	YFAKALESPERPFLA	0.803	1.05152	-0.316528	0.0724828	0.812753	0.941115	-0.299111	-0.0875577	8170000	330000000	6560000	314000000	14730000	644000000	7.1682	8.80889	77109	49906	Atypical/PIKK/FRAP	FRAP
P02545	1	Lamin-A/C OS=Homo sapiens GN=LMNA PE=1 SV=1 - [LMNA_HUMAN]	P02545	S107	Prelamin-A/C [Cleaved into: Lamin-A/C (70 kDa lamin) (Renal carcinoma antigen NY-REN-32)]	LMNA LMN1	ARLQLELSKVREEFK	1.04	1.08342	0.0565835	0.115597	1.05263	0.969664	0.0740006	-0.044443	255000000	70800000	265000000	65400000	520000000	136200000	8.716	8.13418	5575	24270	CAMK	Trb1
P02545	1	Lamin-A/C OS=Homo sapiens GN=LMNA PE=1 SV=1 - [LMNA_HUMAN]	P02545	S12	Prelamin-A/C [Cleaved into: Lamin-A/C (70 kDa lamin) (Renal carcinoma antigen NY-REN-32)]	LMNA LMN1	SQRRATRSGAQASST	1	1.08814	0	0.121863	1.01215	0.973885	0.0174171	-0.0381772	172000000	87500000	172000000	80500000	344000000	168000000	8.53656	8.22531	3639	114044	AGC/AKT	AKT1, AKT2
P02545	1	Lamin-A/C OS=Homo sapiens GN=LMNA PE=1 SV=1 - [LMNA_HUMAN]	P02545	S18	Prelamin-A/C [Cleaved into: Lamin-A/C (70 kDa lamin) (Renal carcinoma antigen NY-REN-32)]	LMNA LMN1	RSGAQASSTPLSPTR	1.085	1.28866	0.117695	0.365871	1.09818	1.15335	0.135112	0.205831	53700000	18300000	58300000	14200000	112000000	32500000	8.04922	7.51188	3579	113870	CMGC	MOK
P02545	1	Lamin-A/C OS=Homo sapiens GN=LMNA PE=1 SV=1 - [LMNA_HUMAN]	P02545	S22	Prelamin-A/C [Cleaved into: Lamin-A/C (70 kDa lamin) (Renal carcinoma antigen NY-REN-32)]	LMNA LMN1	QASSTPLSPTRITRL	1	1.04167	0	0.0588937	1.01215	0.932292	0.0174171	-0.101147	3610000000	2460000000	3610000000	2370000000	7220000000	4830000000	9.85854	9.68395	3437	113474	CMGC	MOK
P02545	1	Lamin-A/C OS=Homo sapiens GN=LMNA PE=1 SV=1 - [LMNA_HUMAN]	P02545	S390	Prelamin-A/C [Cleaved into: Lamin-A/C (70 kDa lamin) (Renal carcinoma antigen NY-REN-32)]	LMNA LMN1	EEERLRLSPSPTSQR	0.968	1.04167	-0.046921	0.0588937	0.979757	0.932292	-0.029504	-0.101147	4910000000	3010000000	4760000000	2890000000	9670000000	5900000000	9.98543	9.77085	82096	60436	CMGC/CDK/CDC2	CDC2
P02545	1	Lamin-A/C OS=Homo sapiens GN=LMNA PE=1 SV=1 - [LMNA_HUMAN]	P02545	S392	Prelamin-A/C [Cleaved into: Lamin-A/C (70 kDa lamin) (Renal carcinoma antigen NY-REN-32)]	LMNA LMN1	ERLRLSPSPTSQRSR	0.975	1.03627	-0.0365259	0.0513992	0.986842	0.927461	-0.0191088	-0.108641	8190000000	6380000000	7990000000	6160000000	16180000000	12540000000	10.209	10.0983	40142	60227	CMGC/CDK/CDC2	CDC2
P02545	1	Lamin-A/C OS=Homo sapiens GN=LMNA PE=1 SV=1 - [LMNA_HUMAN]	P02545	S398	Prelamin-A/C [Cleaved into: Lamin-A/C (70 kDa lamin) (Renal carcinoma antigen NY-REN-32)]	LMNA LMN1	PSPTSQRSRGRASSH	0.717	0.943396	-0.479955	-0.0840643	0.725709	0.84434	-0.462538	-0.244105	37000000	6010000	26600000	6370000	63600000	12380000	7.80346	7.09272	7302	59528	AGC/PKC	PKCa, PKCi
P02545	1	Lamin-A/C OS=Homo sapiens GN=LMNA PE=1 SV=1 - [LMNA_HUMAN]	P02545	S404	Prelamin-A/C [Cleaved into: Lamin-A/C (70 kDa lamin) (Renal carcinoma antigen NY-REN-32)]	LMNA LMN1	RSRGRASSHSSQTQG	1.201	1.28535	0.264236	0.362158	1.21559	1.15039	0.281653	0.202118	625000	2350000	751000	1830000	1376000	4180000	6.13862	6.62118	69023	153219	AGC/AKT	AKT1, AKT2
P02545	1	Lamin-A/C OS=Homo sapiens GN=LMNA PE=1 SV=1 - [LMNA_HUMAN]	P02545	S407	Prelamin-A/C [Cleaved into: Lamin-A/C (70 kDa lamin) (Renal carcinoma antigen NY-REN-32)]	LMNA LMN1	GRASSHSSQTQGGGS	1.201	1.14811	0.264236	0.199255	1.21559	1.02755	0.281653	0.039215	625000	4900000	751000	4270000	1376000	9170000	6.13862	6.96237	69023	158462	CMGC	MOK
P02545	1	Lamin-A/C OS=Homo sapiens GN=LMNA PE=1 SV=1 - [LMNA_HUMAN]	P02545	S426	Prelamin-A/C [Cleaved into: Lamin-A/C (70 kDa lamin) (Renal carcinoma antigen NY-REN-32)]	LMNA LMN1	RKLESTESRSSFSQH	1.088	1.35318	0.121679	0.436354	1.10121	1.2111	0.139096	0.276313	1420000	1410000	1550000	1040000	2970000	2450000	6.47276	6.38917	59775	168812	AGC	PKN2, YANK3
P02545	1	Lamin-A/C OS=Homo sapiens GN=LMNA PE=1 SV=1 - [LMNA_HUMAN]	P02545	S429	Prelamin-A/C [Cleaved into: Lamin-A/C (70 kDa lamin) (Renal carcinoma antigen NY-REN-32)]	LMNA LMN1	ESTESRSSFSQHART	0.954	1.19617	-0.0679388	0.258425	0.965587	1.07057	-0.0505218	0.0983847	24900000	21100000	23800000	17700000	48700000	38800000	7.68753	7.58883	89070	72478	AGC/PKC	PKCa, PKCi
P02545	1	Lamin-A/C OS=Homo sapiens GN=LMNA PE=1 SV=1 - [LMNA_HUMAN]	P02545	S458	Prelamin-A/C [Cleaved into: Lamin-A/C (70 kDa lamin) (Renal carcinoma antigen NY-REN-32)]	LMNA LMN1	FVRLRNKSNEDQSMG	0.98	1.18624	-0.0291463	0.246395	0.991903	1.06168	-0.0117293	0.0863551	240000000	74300000	235000000	62700000	475000000	137000000	8.67669	8.13672	36628	52242	AGC/AKT	AKT1, AKT2
P02545	1	Lamin-A/C OS=Homo sapiens GN=LMNA PE=1 SV=1 - [LMNA_HUMAN]	P02545	S463	Prelamin-A/C [Cleaved into: Lamin-A/C (70 kDa lamin) (Renal carcinoma antigen NY-REN-32)]	LMNA LMN1	NKSNEDQSMGNWQIK	1.4	1.1976	0.485427	0.260152	1.417	1.07186	0.502844	0.100111	35000000	13100000	49000000	10900000	84000000	24000000	7.92428	7.38021	4729	100538
P02545	1	Lamin-A/C OS=Homo sapiens GN=LMNA PE=1 SV=1 - [LMNA_HUMAN]	P02545	S628	Prelamin-A/C [Cleaved into: Lamin-A/C (70 kDa lamin) (Renal carcinoma antigen NY-REN-32)]	LMNA LMN1	TVTRSYRSVGGSGGG	0.892	1.21951	-0.164884	0.286304	0.902834	1.09146	-0.147467	0.126264	133000000	17400000	119000000	14300000	252000000	31700000	8.4014	7.50106	106106	52273	AGC/DMPK	MRCKb
P02545	1	Lamin-A/C OS=Homo sapiens GN=LMNA PE=1 SV=1 - [LMNA_HUMAN]	P02545	S632	Prelamin-A/C [Cleaved into: Lamin-A/C (70 kDa lamin) (Renal carcinoma antigen NY-REN-32)]	LMNA LMN1	SYRSVGGSGGGSFGD	0.998	1.19474	-0.00288828	0.2567	1.01012	1.0693	0.0145288	0.0966601	59300000	62500000	59200000	52300000	118500000	114800000	8.07372	8.05994	106205	28435	AGC/DMPK	MRCKb
P02545	1	Lamin-A/C OS=Homo sapiens GN=LMNA PE=1 SV=1 - [LMNA_HUMAN]	P02545	S636	Prelamin-A/C [Cleaved into: Lamin-A/C (70 kDa lamin) (Renal carcinoma antigen NY-REN-32)]	LMNA LMN1	VGGSGGGSFGDNLVT	0.956	1.06724	-0.0649175	0.093879	0.967611	0.955176	-0.0475004	-0.0661614	837000000	327000000	800000000	306000000	1637000000	633000000	9.21405	8.8014	5258	28319
P02545	1	Lamin-A/C OS=Homo sapiens GN=LMNA PE=1 SV=1 - [LMNA_HUMAN]	P02545	T19	Prelamin-A/C [Cleaved into: Lamin-A/C (70 kDa lamin) (Renal carcinoma antigen NY-REN-32)]	LMNA LMN1	SGAQASSTPLSPTRI	0.915	1.04822	-0.128156	0.0679388	0.926113	0.938155	-0.110739	-0.0921016	72500000	221000000	66300000	211000000	138800000	432000000	8.14239	8.63548	103835	113101	CMGC/CDK/CDC2	CDC2
P02545	1	Lamin-A/C OS=Homo sapiens GN=LMNA PE=1 SV=1 - [LMNA_HUMAN]	P02545	T394	Prelamin-A/C [Cleaved into: Lamin-A/C (70 kDa lamin) (Renal carcinoma antigen NY-REN-32)]	LMNA LMN1	LRLSPSPTSQRSRGR	0.975	1.03627	-0.0365259	0.0513992	0.986842	0.927461	-0.0191088	-0.108641	65000000	18100000	63300000	17400000	128300000	35500000	8.10823	7.55023	15873	33498	AGC/PKC	PKCa, PKCi
P02686	1	Myelin basic protein OS=Homo sapiens GN=MBP PE=1 SV=3 - [MBP_HUMAN]	P02686	S96	Myelin basic protein (MBP) (Myelin A1 protein) (Myelin membrane encephalitogenic protein)	MBP	PHLIRLFSRDAPGRE	1.297	1.40845	0.375178	0.494109	1.31275	1.26056	0.392596	0.334069	64200000	101000000	83200000	71500000	147400000	172500000	8.1685	8.23679	48515	73742	CAMK/CAMK2	CaMK2d, CaMK2g
P02765	1	Alpha-2-HS-glycoprotein OS=Homo sapiens GN=AHSG PE=1 SV=1 - [FETUA_HUMAN]	P02765	S138	Alpha-2-HS-glycoprotein (Alpha-2-Z-globulin) (Ba-alpha-2-glycoprotein) (Fetuin-A) [Cleaved into: Alpha-2-HS-glycoprotein chain A; Alpha-2-HS-glycoprotein chain B]	AHSG FETUA PRO2743	KCDSSPDSAEDVRKV	1.028	1.08696	0.0398403	0.120294	1.04049	0.972826	0.0572573	-0.0397462	1940000000	899000000	1990000000	827000000	3930000000	1726000000	9.59439	9.23704	34922	50152
P04049	1	RAF proto-oncogene serine/threonine-protein kinase OS=Homo sapiens GN=RAF1 PE=1 SV=1 - [RAF1_HUMAN]	P04049	S259	RAF proto-oncogene serine/threonine-protein kinase (EC 2.7.11.1) (Proto-oncogene c-RAF) (cRaf) (Raf-1)	RAF1 RAF	SQRQRSTSTPNVHMV	1.011	1.01215	0.015783	0.0174171	1.02328	0.90587	0.0332001	-0.142623	358000000	363000000	362000000	359000000	720000000	722000000	8.85733	8.85854	76127	48090	AGC/SGK	SGK1
P04049	1	RAF proto-oncogene serine/threonine-protein kinase OS=Homo sapiens GN=RAF1 PE=1 SV=1 - [RAF1_HUMAN]	P04049	S296	RAF proto-oncogene serine/threonine-protein kinase (EC 2.7.11.1) (Proto-oncogene c-RAF) (cRaf) (Raf-1)	RAF1 RAF	SPSALSSSPNNLSPT	0.915	1.20919	-0.128156	0.274041	0.926113	1.08222	-0.110739	0.114	51400000	18000000	47100000	14900000	98500000	32900000	7.99344	7.5172	41262	145585	Atypical/PIKK/FRAP	FRAP
P04049	1	RAF proto-oncogene serine/threonine-protein kinase OS=Homo sapiens GN=RAF1 PE=1 SV=1 - [RAF1_HUMAN]	P04049	S301	RAF proto-oncogene serine/threonine-protein kinase (EC 2.7.11.1) (Proto-oncogene c-RAF) (cRaf) (Raf-1)	RAF1 RAF	SSSPNNLSPTGWSQP	0.924	1.26263	-0.114035	0.336428	0.935223	1.13005	-0.0966182	0.176387	27900000	2940000	25800000	2330000	53700000	5270000	7.72997	6.72181	40958	38745	Atypical/PIKK/FRAP	FRAP
P04049	1	RAF proto-oncogene serine/threonine-protein kinase OS=Homo sapiens GN=RAF1 PE=1 SV=1 - [RAF1_HUMAN]	P04049	S43	RAF proto-oncogene serine/threonine-protein kinase (EC 2.7.11.1) (Proto-oncogene c-RAF) (cRaf) (Raf-1)	RAF1 RAF	FGYQRRASDDGKLTD	1.31	1.30548	0.389567	0.384584	1.32591	1.16841	0.406984	0.224543	62500000	77100000	81900000	59000000	144400000	136100000	8.15957	8.13386	47359	72375	AGC/PKA	PKACa, PKACg
P04075	1	Fructose-bisphosphate aldolase A OS=Homo sapiens GN=ALDOA PE=1 SV=2 - [ALDOA_HUMAN]	P04075	S36	Fructose-bisphosphate aldolase A (EC 4.1.2.13) (Lung cancer antigen NY-LU-1) (Muscle-type aldolase)	ALDOA ALDA	GILAADESTGSIAKR	0.993	1.06383	-0.0101344	0.0892673	1.00506	0.952128	0.00728268	-0.0707731	88800000	97900000	88100000	92000000	176900000	189900000	8.24773	8.27852	5072	117191
P04075	1	Fructose-bisphosphate aldolase A OS=Homo sapiens GN=ALDOA PE=1 SV=2 - [ALDOA_HUMAN]	P04075	S39	Fructose-bisphosphate aldolase A (EC 4.1.2.13) (Lung cancer antigen NY-LU-1) (Muscle-type aldolase)	ALDOA ALDA	AADESTGSIAKRLQS	0.955	1.04932	-0.0664274	0.0694519	0.966599	0.93914	-0.0490103	-0.0905885	53800000	234000000	51400000	224000000	105200000	458000000	8.02202	8.66087	10950	116816
P04075	1	Fructose-bisphosphate aldolase A OS=Homo sapiens GN=ALDOA PE=1 SV=2 - [ALDOA_HUMAN]	P04075	S46	Fructose-bisphosphate aldolase A (EC 4.1.2.13) (Lung cancer antigen NY-LU-1) (Muscle-type aldolase)	ALDOA ALDA	SIAKRLQSIGTENTE	0.836	1.29534	-0.258425	0.373327	0.846154	1.15933	-0.241008	0.213287	69100000	29300000	57800000	22600000	126900000	51900000	8.10346	7.71517	52808	169109	CAMK/CAMKL/AMPK	AMPKa2
P04083	1	Annexin A1 OS=Homo sapiens GN=ANXA1 PE=1 SV=2 - [ANXA1_HUMAN]	P04083	S170	Annexin A1 (Annexin I) (Annexin-1) (Calpactin II) (Calpactin-2) (Chromobindin-9) (Lipocortin I) (Phospholipase A2 inhibitory protein) (p35)	ANXA1 ANX1 LPC1	DLAKDITSDTSGDFR	0.888	1.26422	-0.171368	0.33825	0.898785	1.13148	-0.153951	0.17821	3550000	1960000	3160000	1550000	6710000	3510000	6.82672	6.54531	67123	104458
P04183	1	Thymidine kinase, cytosolic OS=Homo sapiens GN=TK1 PE=1 SV=2 - [KITH_HUMAN]	P04183	S231	Thymidine kinase, cytosolic (EC 2.7.1.21)	TK1	PQQILQCSPAN****	1.085	1.20337	0.117695	0.26708	1.09818	1.07702	0.135112	0.107039	6890000	3460000	7470000	2880000	14360000	6340000	7.15715	6.80209	62247	96271	CMGC/CDK/CDC2	CDC2, CDK2
P04406	1	Glyceraldehyde-3-phosphate dehydrogenase OS=Homo sapiens GN=GAPDH PE=1 SV=3 - [G3P_HUMAN]	P04406	S210	Glyceraldehyde-3-phosphate dehydrogenase (GAPDH) (EC 1.2.1.12) (Peptidyl-cysteine S-nitrosylase GAPDH) (EC 2.6.99.-)	GAPDH GAPD CDABP0047 OK/SW-cl.12	LQNIIPASTGAAKAV	1.05	0.996016	0.0703893	-0.00575927	1.06275	0.891434	0.0878064	-0.1658	27800000	79600000	29200000	79900000	57000000	159500000	7.75587	8.20276	106478	118432
P04406	1	Glyceraldehyde-3-phosphate dehydrogenase OS=Homo sapiens GN=GAPDH PE=1 SV=3 - [G3P_HUMAN]	P04406	S83	Glyceraldehyde-3-phosphate dehydrogenase (GAPDH) (EC 1.2.1.12) (Peptidyl-cysteine S-nitrosylase GAPDH) (EC 2.6.99.-)	GAPDH GAPD CDABP0047 OK/SW-cl.12	IFQERDPSKIKWGDA	1.027	1.24224	0.0384362	0.312939	1.03947	1.1118	0.0558532	0.152899	69700000	464000000	71600000	373000000	141300000	837000000	8.15014	8.92273	76995	49796
P04637	1	Cellular tumor antigen p53 OS=Homo sapiens GN=TP53 PE=1 SV=3 - [P53_HUMAN]	P04637	S315	Cellular tumor antigen p53 (Antigen NY-CO-13) (Phosphoprotein p53) (Tumor suppressor p53)	TP53 P53	LPNNTSSSPQPKKKP	0.993	1.10497	-0.0101344	0.14401	1.00506	0.98895	0.00728268	-0.0160301	21800000	13200000	21600000	11900000	43400000	25100000	7.63749	7.39967	42249	65251
P04792	1	Heat shock protein beta-1 OS=Homo sapiens GN=HSPB1 PE=1 SV=2 - [HSPB1_HUMAN]	P04792	S15	Heat shock protein beta-1 (HspB1) (28 kDa heat shock protein) (Estrogen-regulated 24 kDa protein) (Heat shock 27 kDa protein) (HSP 27) (Stress-responsive protein 27) (SRP27)	HSPB1 HSP27 HSP28	FSLLRGPSWDPFRDW	1.123	1.20192	0.167358	0.265345	1.13664	1.07572	0.184775	0.105304	145000000	218000000	163000000	181000000	308000000	399000000	8.48855	8.60097	6468	80263	CAMK/MAPKAPK	MAPKAPK2, MAPKAPK3, MAPKAPK5
P04792	1	Heat shock protein beta-1 OS=Homo sapiens GN=HSPB1 PE=1 SV=2 - [HSPB1_HUMAN]	P04792	S199	Heat shock protein beta-1 (HspB1) (28 kDa heat shock protein) (Estrogen-regulated 24 kDa protein) (Heat shock 27 kDa protein) (HSP 27) (Stress-responsive protein 27) (SRP27)	HSPB1 HSP27 HSP28	GGPEAAKSDETAAK*	0.996	1.02987	-0.00578235	0.0424568	1.0081	0.92173	0.0116347	-0.117584	198000000	118000000	197000000	114000000	395000000	232000000	8.5966	8.36549	32468	47019	Other/CK2	CK2a2
P04792	1	Heat shock protein beta-1 OS=Homo sapiens GN=HSPB1 PE=1 SV=2 - [HSPB1_HUMAN]	P04792	S78	Heat shock protein beta-1 (HspB1) (28 kDa heat shock protein) (Estrogen-regulated 24 kDa protein) (Heat shock 27 kDa protein) (HSP 27) (Stress-responsive protein 27) (SRP27)	HSPB1 HSP27 HSP28	PAYSRALSRQLSSGV	0.862	0.935454	-0.21424	-0.0962619	0.87247	0.837231	-0.196823	-0.256302	285000000	95800000	246000000	102000000	531000000	197800000	8.72509	8.29623	5371	28096	CAMK/MAPKAPK	MAPKAPK2, MAPKAPK3, MAPKAPK5
P04792	1	Heat shock protein beta-1 OS=Homo sapiens GN=HSPB1 PE=1 SV=2 - [HSPB1_HUMAN]	P04792	S82	Heat shock protein beta-1 (HspB1) (28 kDa heat shock protein) (Estrogen-regulated 24 kDa protein) (Heat shock 27 kDa protein) (HSP 27) (Stress-responsive protein 27) (SRP27)	HSPB1 HSP27 HSP28	RALSRQLSSGVSEIR	1.073	1.15875	0.10165	0.212568	1.08603	1.03708	0.119067	0.0525271	22400000000	10800000000	24000000000	9330000000	46400000000	20130000000	10.6665	10.3038	4389	27110	CAMK/PKD	PKD1
P04792	1	Heat shock protein beta-1 OS=Homo sapiens GN=HSPB1 PE=1 SV=2 - [HSPB1_HUMAN]	P04792	S83	Heat shock protein beta-1 (HspB1) (28 kDa heat shock protein) (Estrogen-regulated 24 kDa protein) (Heat shock 27 kDa protein) (HSP 27) (Stress-responsive protein 27) (SRP27)	HSPB1 HSP27 HSP28	ALSRQLSSGVSEIRH	0.845	0.760456	-0.242977	-0.395063	0.855263	0.680608	-0.22556	-0.555103	242000000	1950000	204000000	2570000	446000000	4520000	8.64933	6.65514	5139	157390	CAMK	DCLK1
P04792	1	Heat shock protein beta-1 OS=Homo sapiens GN=HSPB1 PE=1 SV=2 - [HSPB1_HUMAN]	P04792	T174	Heat shock protein beta-1 (HspB1) (28 kDa heat shock protein) (Estrogen-regulated 24 kDa protein) (Heat shock 27 kDa protein) (HSP 27) (Stress-responsive protein 27) (SRP27)	HSPB1 HSP27 HSP28	APMPKLATQSNEITI	1.107	1.10988	0.146655	0.150401	1.12045	0.993341	0.164072	-0.00963942	8310000	22400000	9200000	20200000	17510000	42600000	7.24329	7.62941	72194	30120
P05114	1	Non-histone chromosomal protein HMG-14 OS=Homo sapiens GN=HMGN1 PE=1 SV=3 - [HMGN1_HUMAN]	P05114	S86	Non-histone chromosomal protein HMG-14 (High mobility group nucleosome-binding domain-containing protein 1)	HMGN1 HMG14	GETKTEESPASDEAG	0.999	1.27065	-0.00144342	0.345564	1.01113	1.13723	0.0159736	0.185524	32600000	5090000	32600000	4010000	65200000	9100000	7.81425	6.95904	74869	40825
P05114	1	Non-histone chromosomal protein HMG-14 OS=Homo sapiens GN=HMGN1 PE=1 SV=3 - [HMGN1_HUMAN]	P05114	S89	Non-histone chromosomal protein HMG-14 (High mobility group nucleosome-binding domain-containing protein 1)	HMGN1 HMG14	KTEESPASDEAGEKE	0.827	1.49254	-0.274041	0.577767	0.837045	1.33582	-0.256624	0.417727	133000000	44800000	110000000	30100000	243000000	74900000	8.38561	7.87448	82044	47187
P05362	1	Intercellular adhesion molecule 1 OS=Homo sapiens GN=ICAM1 PE=1 SV=2 - [ICAM1_HUMAN]	P05362	T530	Intercellular adhesion molecule 1 (ICAM-1) (Major group rhinovirus receptor) (CD antigen CD54)	ICAM1	MKPNTQATPP*****	0.97	1.05374	-0.0439433	0.07552	0.981781	0.943098	-0.0265263	-0.0845204	98100000	98400000	95100000	93500000	193200000	191900000	8.28601	8.28307	14608	34919	CMGC/CDK/CDC2	CDK2
P05386;P05387	2	60S acidic ribosomal protein P1 OS=Homo sapiens GN=RPLP1 PE=1 SV=1 - [RLA1_HUMAN]|60S acidic ribosomal protein P2 OS=Homo sapiens GN=RPLP2 PE=1 SV=1 - [RLA2_HUMAN]	P05386	S101	60S acidic ribosomal protein P1	RPLP1 RRP1	VEAKKEESEESDDDM	0.897	1.25	-0.15682	0.321928	0.907895	1.11875	-0.139403	0.161888	1310000000	63600000	1170000000	50900000	2480000000	114500000	9.39445	8.05881	6778	111719	Other/CK2	CK2a2	P05387	S102	60S acidic ribosomal protein P2 (Renal carcinoma antigen NY-REN-44)	RPLP2 D11S2243E RPP2
P05386;P05387	2	60S acidic ribosomal protein P1 OS=Homo sapiens GN=RPLP1 PE=1 SV=1 - [RLA1_HUMAN]|60S acidic ribosomal protein P2 OS=Homo sapiens GN=RPLP2 PE=1 SV=1 - [RLA2_HUMAN]	P05386	S104	60S acidic ribosomal protein P1	RPLP1 RRP1	KKEESEESDDDMGFG	0.897	1.19048	-0.15682	0.251539	0.907895	1.06548	-0.139403	0.0914984	1310000000	780000000	1170000000	655000000	2480000000	1435000000	9.39445	9.15685	6778	30159	Other/CK2	CK2a2	P05387	S105	60S acidic ribosomal protein P2 (Renal carcinoma antigen NY-REN-44)	RPLP2 D11S2243E RPP2
P05387	1	60S acidic ribosomal protein P2 OS=Homo sapiens GN=RPLP2 PE=1 SV=1 - [RLA2_HUMAN]	P05387	S17	60S acidic ribosomal protein P2 (Renal carcinoma antigen NY-REN-44)	RPLP2 D11S2243E RPP2	AALGGNSSPSAKDIK	0.979	1.12233	-0.0306192	0.166503	0.990891	1.00449	-0.0132022	0.00646225	110000000	281000000	108000000	250000000	218000000	531000000	8.33846	8.72509	6936	30562	Atypical/PIKK/FRAP	FRAP
P05387	1	60S acidic ribosomal protein P2 OS=Homo sapiens GN=RPLP2 PE=1 SV=1 - [RLA2_HUMAN]	P05387	S86	60S acidic ribosomal protein P2 (Renal carcinoma antigen NY-REN-44)	RPLP2 D11S2243E RPP2	SAAPAAGSAPAAAEE	1.271	1.1976	0.345964	0.260152	1.28644	1.07186	0.363381	0.100111	8490000	29800000	10800000	24900000	19290000	54700000	7.28533	7.73799	11441	18827	STE/STE-Unique/NIK	NIK
P05388	1	60S acidic ribosomal protein P0 OS=Homo sapiens GN=RPLP0 PE=1 SV=1 - [RLA0_HUMAN]	P05388	S304	60S acidic ribosomal protein P0 (60S ribosomal protein L10E)	RPLP0	KVEAKEESEESDEDM	1.091	1.06724	0.125651	0.093879	1.10425	0.955176	0.143068	-0.0661614	3860000	176000000	4220000	165000000	8080000	341000000	6.90741	8.53275	62181	97457	Other/IKK	TBK1
P05388	1	60S acidic ribosomal protein P0 OS=Homo sapiens GN=RPLP0 PE=1 SV=1 - [RLA0_HUMAN]	P05388	S307	60S acidic ribosomal protein P0 (60S ribosomal protein L10E)	RPLP0	AKEESEESDEDMGFG	1.069	1.07875	0.0962619	0.109359	1.08198	0.96548	0.113679	-0.0506817	10400000	5810000	11100000	5380000	21500000	11190000	7.33244	7.04883	1643	120425
P05412	1	Transcription factor AP-1 OS=Homo sapiens GN=JUN PE=1 SV=2 - [JUN_HUMAN]	P05412	S243	Transcription factor AP-1 (Activator protein 1) (AP1) (Proto-oncogene c-Jun) (V-jun avian sarcoma virus 17 oncogene homolog) (p39)	JUN	PGETPPLSPIDMESQ	1.008	1.13379	0.0114956	0.181149	1.02024	1.01474	0.0289127	0.021109	1460000	12200000	1470000	10800000	2930000	23000000	6.46687	7.36173	109481	45668
P05412	1	Transcription factor AP-1 OS=Homo sapiens GN=JUN PE=1 SV=2 - [JUN_HUMAN]	P05412	S73	Transcription factor AP-1 (Activator protein 1) (AP1) (Proto-oncogene c-Jun) (V-jun avian sarcoma virus 17 oncogene homolog) (p39)	JUN	VGLLKLASPELERLI	1.042	1.09051	0.0593553	0.125006	1.05466	0.976009	0.0767723	-0.0350341	180000000	206000000	187000000	189000000	367000000	395000000	8.56467	8.5966	4090	26727
P05412	1	Transcription factor AP-1 OS=Homo sapiens GN=JUN PE=1 SV=2 - [JUN_HUMAN]	P05412	T239	Transcription factor AP-1 (Activator protein 1) (AP1) (Proto-oncogene c-Jun) (V-jun avian sarcoma virus 17 oncogene homolog) (p39)	JUN	VPEMPGETPPLSPID	1.008	2.29358	0.0114956	1.1976	1.02024	2.05275	0.0289127	1.03756	1460000	488000	1470000	213000	2930000	701000	6.46687	5.84572	109481	34117
P05455	1	Lupus La protein OS=Homo sapiens GN=SSB PE=1 SV=2 - [LA_HUMAN]	P05455	S366	Lupus La protein (La autoantigen) (La ribonucleoprotein) (Sjoegren syndrome type B antigen) (SS-B)	SSB	GKKTKFASDDEHDEH	0.848	1.28866	-0.237864	0.365871	0.8583	1.15335	-0.220447	0.205831	4640000000	1720000000	3930000000	1340000000	8570000000	3060000000	9.93298	9.48572	52318	83357
P05534;P01891	2	HLA class I histocompatibility antigen, A-24 alpha chain OS=Homo sapiens GN=HLA-A PE=1 SV=2 - [1A24_HUMAN]|HLA class I histocompatibility antigen, A-68 alpha chain OS=Homo sapiens GN=HLA-A PE=1 SV=4 - [1A68_HUMAN]	P05534	S352	HLA class I histocompatibility antigen, A-24 alpha chain (Aw-24) (HLA class I histocompatibility antigen, A-9 alpha chain) (MHC class I antigen A*24)	HLA-A HLAA	SQAASSDSAQGSDVS	0.999	1.5015	-0.00144342	0.586406	1.01113	1.34384	0.0159736	0.426366	8640000	861000	8640000	574000	17280000	1435000	7.23754	6.15685	71006	37334			P01891	S352	HLA class I histocompatibility antigen, A-68 alpha chain (Aw-68) (HLA class I histocompatibility antigen, A-28 alpha chain) (MHC class I antigen A*68)	HLA-A HLAA
P05534;P01891	2	HLA class I histocompatibility antigen, A-24 alpha chain OS=Homo sapiens GN=HLA-A PE=1 SV=2 - [1A24_HUMAN]|HLA class I histocompatibility antigen, A-68 alpha chain OS=Homo sapiens GN=HLA-A PE=1 SV=4 - [1A68_HUMAN]	P05534	S356	HLA class I histocompatibility antigen, A-24 alpha chain (Aw-24) (HLA class I histocompatibility antigen, A-9 alpha chain) (MHC class I antigen A*24)	HLA-A HLAA	SSDSAQGSDVSLTAC	1.005	1.26103	0.0071955	0.334607	1.01721	1.12863	0.0246126	0.174567	18500000	17000000	18600000	13500000	37100000	30500000	7.56937	7.4843	40516	60636			P01891	S356	HLA class I histocompatibility antigen, A-68 alpha chain (Aw-68) (HLA class I histocompatibility antigen, A-28 alpha chain) (MHC class I antigen A*68)	HLA-A HLAA
P05534;P01891	2	HLA class I histocompatibility antigen, A-24 alpha chain OS=Homo sapiens GN=HLA-A PE=1 SV=2 - [1A24_HUMAN]|HLA class I histocompatibility antigen, A-68 alpha chain OS=Homo sapiens GN=HLA-A PE=1 SV=4 - [1A68_HUMAN]	P05534	S359	HLA class I histocompatibility antigen, A-24 alpha chain (Aw-24) (HLA class I histocompatibility antigen, A-9 alpha chain) (MHC class I antigen A*24)	HLA-A HLAA	SAQGSDVSLTACKV*	0.807	1.25628	-0.309359	0.32916	0.816802	1.12437	-0.291942	0.169119	15000000	39900000	12100000	31700000	27100000	71600000	7.43297	7.85491	20863	38490			P01891	S359	HLA class I histocompatibility antigen, A-68 alpha chain (Aw-68) (HLA class I histocompatibility antigen, A-28 alpha chain) (MHC class I antigen A*68)	HLA-A HLAA
P05783	1	Keratin, type I cytoskeletal 18 OS=Homo sapiens GN=KRT18 PE=1 SV=2 - [K1C18_HUMAN]	P05783	S100	Keratin, type I cytoskeletal 18 (Cell proliferation-inducing gene 46 protein) (Cytokeratin-18) (CK-18) (Keratin-18) (K18)	KRT18 CYK18 PIG46	SYLDRVRSLETENRR	1.121	1.15473	0.164786	0.207561	1.13462	1.03349	0.182203	0.0475207	10000000	469000	11200000	406000	21200000	875000	7.32634	5.94201	42285	138887
P05783	1	Keratin, type I cytoskeletal 18 OS=Homo sapiens GN=KRT18 PE=1 SV=2 - [K1C18_HUMAN]	P05783	S305	Keratin, type I cytoskeletal 18 (Cell proliferation-inducing gene 46 protein) (Cytokeratin-18) (CK-18) (Keratin-18) (K18)	KRT18 CYK18 PIG46	ELRRTVQSLEIDLDS	0.885	1.1655	-0.176251	0.22095	0.895749	1.04312	-0.158834	0.06091	67500000	44200000	59800000	37900000	127300000	82100000	8.10483	7.91434	5971	29223
P05783	1	Keratin, type I cytoskeletal 18 OS=Homo sapiens GN=KRT18 PE=1 SV=2 - [K1C18_HUMAN]	P05783	S399	Keratin, type I cytoskeletal 18 (Cell proliferation-inducing gene 46 protein) (Cytokeratin-18) (CK-18) (Keratin-18) (K18)	KRT18 CYK18 PIG46	LGDALDSSNSMQTIQ	0.924	1.221	-0.114035	0.288065	0.935223	1.0928	-0.0966182	0.128024	21800000	27600000	20100000	22700000	41900000	50300000	7.62221	7.70157	26421	107030
P05783	1	Keratin, type I cytoskeletal 18 OS=Homo sapiens GN=KRT18 PE=1 SV=2 - [K1C18_HUMAN]	P05783	S53	Keratin, type I cytoskeletal 18 (Cell proliferation-inducing gene 46 protein) (Cytokeratin-18) (CK-18) (Keratin-18) (K18)	KRT18 CYK18 PIG46	ISVSRSTSFRGGMGS	1.106	1.20482	0.145351	0.268817	1.11943	1.07831	0.162768	0.108776	71300000	605000000	78800000	502000000	150100000	1107000000	8.17638	9.04415	76812	125760	AGC/PKC	PKCa, PKCb, PKCe
P05783	1	Keratin, type I cytoskeletal 18 OS=Homo sapiens GN=KRT18 PE=1 SV=2 - [K1C18_HUMAN]	P05783	S60	Keratin, type I cytoskeletal 18 (Cell proliferation-inducing gene 46 protein) (Cytokeratin-18) (CK-18) (Keratin-18) (K18)	KRT18 CYK18 PIG46	SFRGGMGSGGLATGI	1.07	1.20482	0.0976108	0.268817	1.083	1.07831	0.115028	0.108776	18700000	605000000	20000000	502000000	38700000	1107000000	7.58771	9.04415	34388	125760
P06241	1	Proto-oncogene tyrosine-protein kinase Fyn OS=Homo sapiens GN=FYN PE=1 SV=3 - [FYN_HUMAN]	P06241	S21	Tyrosine-protein kinase Fyn (EC 2.7.10.2) (Proto-oncogene Syn) (Proto-oncogene c-Fyn) (Src-like kinase) (SLK) (p59-Fyn)	FYN	LTEERDGSLNQSSGY	1.168	1.18624	0.22404	0.246395	1.18219	1.06168	0.241457	0.0863551	23100000	1230000	27000000	1040000	50100000	2270000	7.69984	6.35603	78103	57475	TKL/RAF	RAF1
P06400	1	Retinoblastoma-associated protein OS=Homo sapiens GN=RB1 PE=1 SV=2 - [RB_HUMAN]	P06400	S249	Retinoblastoma-associated protein (p105-Rb) (pRb) (Rb) (pp110)	RB1	AVIPINGSPRTPRRG	1.006	1.08932	0.00863031	0.123434	1.01822	0.974946	0.0260474	-0.0366065	168000000	166000000	169000000	153000000	337000000	319000000	8.52763	8.50379	4924	117183	Atypical/PIKK/FRAP	FRAP
P06400	1	Retinoblastoma-associated protein OS=Homo sapiens GN=RB1 PE=1 SV=2 - [RB_HUMAN]	P06400	T356	Retinoblastoma-associated protein (p105-Rb) (pRb) (Rb) (pp110)	RB1	DSFETQRTPRKSNLD	1.045	0.735835	0.0635029	-0.442545	1.05769	0.658572	0.08092	-0.602586	11300000	11100000	11800000	15200000	23100000	26300000	7.36361	7.41996	46323	55588	Atypical/PIKK/FRAP	FRAP
P06733	1	Alpha-enolase OS=Homo sapiens GN=ENO1 PE=1 SV=2 - [ENOA_HUMAN]	P06733	S254	Alpha-enolase (EC 4.2.1.11) (2-phospho-D-glycerate hydro-lyase) (C-myc promoter-binding protein) (Enolase 1) (MBP-1) (MPB-1) (Non-neural enolase) (NNE) (Phosphopyruvate hydratase) (Plasminogen-binding protein)	ENO1 ENO1L1 MBPB1 MPB1	AASEFFRSGKYDLDF	0.87	1.08342	-0.200913	0.115597	0.880567	0.969664	-0.183496	-0.044443	7230000	3700000	6290000	3420000	13520000	7120000	7.13098	6.85248	88145	148722
P06733	1	Alpha-enolase OS=Homo sapiens GN=ENO1 PE=1 SV=2 - [ENOA_HUMAN]	P06733	S263	Alpha-enolase (EC 4.2.1.11) (2-phospho-D-glycerate hydro-lyase) (C-myc promoter-binding protein) (Enolase 1) (MBP-1) (MPB-1) (Non-neural enolase) (NNE) (Phosphopyruvate hydratase) (Plasminogen-binding protein)	ENO1 ENO1L1 MBPB1 MPB1	KYDLDFKSPDDPSRY	1.014	1.34953	0.0200577	0.432455	1.02632	1.20783	0.0374747	0.272414	19500000	21700000	19800000	16100000	39300000	37800000	7.59439	7.57749	90374	73852	Atypical/PIKK/FRAP	FRAP
P06733	1	Alpha-enolase OS=Homo sapiens GN=ENO1 PE=1 SV=2 - [ENOA_HUMAN]	P06733	S419	Alpha-enolase (EC 4.2.1.11) (2-phospho-D-glycerate hydro-lyase) (C-myc promoter-binding protein) (Enolase 1) (MBP-1) (MPB-1) (Non-neural enolase) (NNE) (Phosphopyruvate hydratase) (Plasminogen-binding protein)	ENO1 ENO1L1 MBPB1 MPB1	RIEEELGSKAKFAGR	1.154	0.834725	0.206643	-0.260628	1.16802	0.747078	0.22406	-0.420668	4070000	7690000	4700000	9220000	8770000	16910000	6.943	7.22814	69740	22612
P06748	1	Nucleophosmin OS=Homo sapiens GN=NPM1 PE=1 SV=2 - [NPM_HUMAN]	P06748	S125	Nucleophosmin (NPM) (Nucleolar phosphoprotein B23) (Nucleolar protein NO38) (Numatrin)	NPM1 NPM	AVEEDAESEDEEEED	0.625	1.35685	-0.678072	0.440263	0.632591	1.21438	-0.660655	0.280223	78000000	182000000	48700000	134000000	126700000	316000000	8.10278	8.49969	88315	71707	Other/CK2	CK2a2
P06748	1	Nucleophosmin OS=Homo sapiens GN=NPM1 PE=1 SV=2 - [NPM_HUMAN]	P06748	S137	Nucleophosmin (NPM) (Nucleolar phosphoprotein B23) (Nucleolar protein NO38) (Numatrin)	NPM1 NPM	EEDVKLLSISGKRSA	1.258	1.39276	0.331132	0.477944	1.27328	1.24652	0.348549	0.317904	112000000	132000000	141000000	95000000	253000000	227000000	8.40312	8.35603	4850	27640	TKL/RAF	BRAF
P06748	1	Nucleophosmin OS=Homo sapiens GN=NPM1 PE=1 SV=2 - [NPM_HUMAN]	P06748	S243	Nucleophosmin (NPM) (Nucleolar phosphoprotein B23) (Nucleolar protein NO38) (Numatrin)	NPM1 NPM	KTPKGPSSVEDIKAK	0.867	0.932836	-0.205896	-0.100305	0.87753	0.834888	-0.188479	-0.260345	163000000	93700000	141000000	100000000	304000000	193700000	8.48287	8.28713	3892	114384	Other/CK2	CK2a2
P06748	1	Nucleophosmin OS=Homo sapiens GN=NPM1 PE=1 SV=2 - [NPM_HUMAN]	P06748	S254	Nucleophosmin (NPM) (Nucleolar phosphoprotein B23) (Nucleolar protein NO38) (Numatrin)	NPM1 NPM	IKAKMQASIEKGGSL	1.026	0.853242	0.0370307	-0.228973	1.03846	0.763652	0.0544478	-0.389013	32900000	17400000	33800000	20400000	66700000	37800000	7.82413	7.57749	3420	108611
P06748	1	Nucleophosmin OS=Homo sapiens GN=NPM1 PE=1 SV=2 - [NPM_HUMAN]	P06748	S260	Nucleophosmin (NPM) (Nucleolar phosphoprotein B23) (Nucleolar protein NO38) (Numatrin)	NPM1 NPM	ASIEKGGSLPKVEAK	0.942	1.00806	-0.086201	0.011588	0.953441	0.902218	-0.068784	-0.148452	104000000	189000000	98300000	188000000	202300000	377000000	8.306	8.57634	35771	134209
P06748	1	Nucleophosmin OS=Homo sapiens GN=NPM1 PE=1 SV=2 - [NPM_HUMAN]	P06748	S70	Nucleophosmin (NPM) (Nucleolar phosphoprotein B23) (Nucleolar protein NO38) (Numatrin)	NPM1 NPM	EAMNYEGSPIKVTLA	0.98	1.57233	-0.0291463	0.652901	0.991903	1.40723	-0.0117293	0.492861	50600000	240000000	49600000	152000000	100200000	392000000	8.00087	8.59329	31439	42373	Atypical/PIKK/FRAP	FRAP
P06753	1	Tropomyosin alpha-3 chain OS=Homo sapiens GN=TPM3 PE=1 SV=1 - [TPM3_HUMAN]	P06753	S87	Tropomyosin alpha-3 chain (Gamma-tropomyosin) (Tropomyosin-3) (Tropomyosin-5) (hTM5)	TPM3	DAEAEVASLNRRIQL	0.818	1.03306	-0.289827	0.046921	0.827935	0.924587	-0.27241	-0.113119	29900000	4370000	24500000	4230000	54400000	8600000	7.7356	6.9345	36170	130502
P07108	1	Acyl-CoA-binding protein OS=Homo sapiens GN=DBI PE=1 SV=2 - [ACBP_HUMAN]	P07108	Y29	Acyl-CoA-binding protein (ACBP) (Diazepam-binding inhibitor) (DBI) (Endozepine) (EP)	DBI	DEEMLFIYGHYKQAT	0.808	1.30378	-0.307573	0.382702	0.817814	1.16688	-0.290156	0.222661	2220000	4030000	1790000	3090000	4010000	7120000	6.60314	6.85248	49048	167271
P07199	1	Major centromere autoantigen B OS=Homo sapiens GN=CENPB PE=1 SV=2 - [CENPB_HUMAN]	P07199	S156	Major centromere autoantigen B (Centromere protein B) (CENP-B)	CENPB	RTPAAPASPAAVPSE	0.894	1.01833	-0.161653	0.0262051	0.904858	0.911405	-0.144236	-0.133835	17200000	34400000	15400000	33800000	32600000	68200000	7.51322	7.83378	10799	27695	CMGC/CDK/CDC2	CDC2
P07355	1	Annexin A2 OS=Homo sapiens GN=ANXA2 PE=1 SV=2 - [ANXA2_HUMAN]	P07355	S12	Annexin A2 (Annexin II) (Annexin-2) (Calpactin I heavy chain) (Calpactin-1 heavy chain) (Chromobindin-8) (Lipocortin II) (Placental anticoagulant protein IV) (PAP-IV) (Protein I) (p36)	ANXA2 ANX2 ANX2L4 CAL1H LPC2D	HEILCKLSLEGDHST	0.917	1.32802	-0.125006	0.409278	0.928138	1.18858	-0.107589	0.249238	16300000	8890000	14900000	6690000	31200000	15580000	7.49415	7.19257	33766	125221
P07355	1	Annexin A2 OS=Homo sapiens GN=ANXA2 PE=1 SV=2 - [ANXA2_HUMAN]	P07355	S127	Annexin A2 (Annexin II) (Annexin-2) (Calpactin I heavy chain) (Calpactin-1 heavy chain) (Chromobindin-8) (Lipocortin II) (Placental anticoagulant protein IV) (PAP-IV) (Protein I) (p36)	ANXA2 ANX2 ANX2L4 CAL1H LPC2D	GLGTDEDSLIEIICS	0.895	1.16959	-0.16004	0.226004	0.90587	1.04678	-0.142623	0.0659633	16300000	51600000	14600000	44100000	30900000	95700000	7.48996	7.98091	6930	30528	CK1	CK1d, CK1e
P07355	1	Annexin A2 OS=Homo sapiens GN=ANXA2 PE=1 SV=2 - [ANXA2_HUMAN]	P07355	S164	Annexin A2 (Annexin II) (Annexin-2) (Calpactin I heavy chain) (Calpactin-1 heavy chain) (Chromobindin-8) (Lipocortin II) (Placental anticoagulant protein IV) (PAP-IV) (Protein I) (p36)	ANXA2 ANX2 ANX2L4 CAL1H LPC2D	KDIISDTSGDFRKLM	1.216	2.0284	0.282143	1.02034	1.23077	1.81542	0.29956	0.8603	5130000	2290000	6230000	1130000	11360000	3420000	7.05538	6.53403	33745	125189	CAMK/PKD	PKD1, PKD2, PKD3
P07355	1	Annexin A2 OS=Homo sapiens GN=ANXA2 PE=1 SV=2 - [ANXA2_HUMAN]	P07355	S18	Annexin A2 (Annexin II) (Annexin-2) (Calpactin I heavy chain) (Calpactin-1 heavy chain) (Chromobindin-8) (Lipocortin II) (Placental anticoagulant protein IV) (PAP-IV) (Protein I) (p36)	ANXA2 ANX2 ANX2L4 CAL1H LPC2D	LSLEGDHSTPPSAYG	1.024	0.938967	0.0342157	-0.0908534	1.03644	0.840376	0.0516328	-0.250894	179000000	140000000	183000000	149000000	362000000	289000000	8.55871	8.4609	33728	48482
P07355	1	Annexin A2 OS=Homo sapiens GN=ANXA2 PE=1 SV=2 - [ANXA2_HUMAN]	P07355	S184	Annexin A2 (Annexin II) (Annexin-2) (Calpactin I heavy chain) (Calpactin-1 heavy chain) (Chromobindin-8) (Lipocortin II) (Placental anticoagulant protein IV) (PAP-IV) (Protein I) (p36)	ANXA2 ANX2 ANX2L4 CAL1H LPC2D	GRRAEDGSVIDYELI	1.038	1.287	0.0538064	0.364013	1.05061	1.15187	0.0712235	0.203973	11400000	24100000	11900000	18700000	23300000	42800000	7.36736	7.63144	26538	20520
P07355	1	Annexin A2 OS=Homo sapiens GN=ANXA2 PE=1 SV=2 - [ANXA2_HUMAN]	P07355	S26	Annexin A2 (Annexin II) (Annexin-2) (Calpactin I heavy chain) (Calpactin-1 heavy chain) (Chromobindin-8) (Lipocortin II) (Placental anticoagulant protein IV) (PAP-IV) (Protein I) (p36)	ANXA2 ANX2 ANX2L4 CAL1H LPC2D	TPPSAYGSVKAYTNF	1.205	1.5361	0.269033	0.619271	1.21964	1.37481	0.28645	0.45923	4650000	23500000	5600000	15300000	10250000	38800000	7.01072	7.58883	33698	55442	TKL/STKR	TGFbR2
P07355	1	Annexin A2 OS=Homo sapiens GN=ANXA2 PE=1 SV=2 - [ANXA2_HUMAN]	P07355	S314	Annexin A2 (Annexin II) (Annexin-2) (Calpactin I heavy chain) (Calpactin-1 heavy chain) (Chromobindin-8) (Lipocortin II) (Placental anticoagulant protein IV) (PAP-IV) (Protein I) (p36)	ANXA2 ANX2 ANX2L4 CAL1H LPC2D	FKRKYGKSLYYYIQQ	1.277	0.75358	0.352759	-0.408168	1.29251	0.674454	0.370176	-0.568209	596000	3340000	760000	4430000	1356000	7770000	6.13226	6.89042	26321	101703
P07355	1	Annexin A2 OS=Homo sapiens GN=ANXA2 PE=1 SV=2 - [ANXA2_HUMAN]	P07355	T19	Annexin A2 (Annexin II) (Annexin-2) (Calpactin I heavy chain) (Calpactin-1 heavy chain) (Chromobindin-8) (Lipocortin II) (Placental anticoagulant protein IV) (PAP-IV) (Protein I) (p36)	ANXA2 ANX2 ANX2L4 CAL1H LPC2D	SLEGDHSTPPSAYGS	1.024	0.938967	0.0342157	-0.0908534	1.03644	0.840376	0.0516328	-0.250894	179000000	140000000	183000000	149000000	362000000	289000000	8.55871	8.4609	33728	48482	Atypical/PIKK/FRAP	FRAP
P07355	1	Annexin A2 OS=Homo sapiens GN=ANXA2 PE=1 SV=2 - [ANXA2_HUMAN]	P07355	Y24	Annexin A2 (Annexin II) (Annexin-2) (Calpactin I heavy chain) (Calpactin-1 heavy chain) (Chromobindin-8) (Lipocortin II) (Placental anticoagulant protein IV) (PAP-IV) (Protein I) (p36)	ANXA2 ANX2 ANX2L4 CAL1H LPC2D	HSTPPSAYGSVKAYT	1.343	1.321	0.425459	0.401635	1.35931	1.1823	0.442876	0.241594	188000000	254000000	253000000	193000000	441000000	447000000	8.64444	8.65031	37089	52032	TK/Src	FYN, SRC
P07737	1	Profilin-1 OS=Homo sapiens GN=PFN1 PE=1 SV=2 - [PROF1_HUMAN]	P07737	S92	Profilin-1 (Profilin I)	PFN1	SMDLRTKSTGGAPTF	0.954	0.85034	-0.0679388	-0.233888	0.965587	0.761054	-0.0505218	-0.393928	8350000	5230000	7960000	6150000	16310000	11380000	7.21245	7.05614	67721	14694
P07814	1	Bifunctional aminoacyl-tRNA synthetase OS=Homo sapiens GN=EPRS PE=1 SV=3 - [SYEP_HUMAN]	P07814	S880	Bifunctional glutamate/proline--tRNA ligase (Bifunctional aminoacyl-tRNA synthetase) (Cell proliferation-inducing gene 32 protein) [Includes: Glutamate--tRNA ligase (EC 6.1.1.17) (Glutamyl-tRNA synthetase) (GluRS); Proline--tRNA ligase (EC 6.1.1.15) (Prolyl-tRNA synthetase)]	EPRS GLNS PARS QARS QPRS PIG32	IPGQPPLSQSSDSSP	1.106	1.17233	0.145351	0.229382	1.11943	1.04924	0.162768	0.0693419	13500000	58000000	15000000	49400000	28500000	107400000	7.45484	8.031	20946	97060	Atypical/PIKK	SMG1
P07814	1	Bifunctional aminoacyl-tRNA synthetase OS=Homo sapiens GN=EPRS PE=1 SV=3 - [SYEP_HUMAN]	P07814	S882	Bifunctional glutamate/proline--tRNA ligase (Bifunctional aminoacyl-tRNA synthetase) (Cell proliferation-inducing gene 32 protein) [Includes: Glutamate--tRNA ligase (EC 6.1.1.17) (Glutamyl-tRNA synthetase) (GluRS); Proline--tRNA ligase (EC 6.1.1.15) (Prolyl-tRNA synthetase)]	EPRS GLNS PARS QARS QPRS PIG32	GQPPLSQSSDSSPTR	0.993	1.18064	-0.0101344	0.239566	1.00506	1.05667	0.00728268	0.0795257	35300000	82800000	35000000	70200000	70300000	153000000	7.84696	8.18469	21058	97178	TKL/STKR	ALK4
P07814	1	Bifunctional aminoacyl-tRNA synthetase OS=Homo sapiens GN=EPRS PE=1 SV=3 - [SYEP_HUMAN]	P07814	S883	Bifunctional glutamate/proline--tRNA ligase (Bifunctional aminoacyl-tRNA synthetase) (Cell proliferation-inducing gene 32 protein) [Includes: Glutamate--tRNA ligase (EC 6.1.1.17) (Glutamyl-tRNA synthetase) (GluRS); Proline--tRNA ligase (EC 6.1.1.15) (Prolyl-tRNA synthetase)]	EPRS GLNS PARS QARS QPRS PIG32	QPPLSQSSDSSPTRN	1.059	1.0989	0.0827026	0.136062	1.07186	0.983516	0.10012	-0.0239789	397000000	522000000	420000000	475000000	817000000	997000000	8.91222	8.9987	71063	28131	TKL/STKR	ALK4
P07814	1	Bifunctional aminoacyl-tRNA synthetase OS=Homo sapiens GN=EPRS PE=1 SV=3 - [SYEP_HUMAN]	P07814	S886	Bifunctional glutamate/proline--tRNA ligase (Bifunctional aminoacyl-tRNA synthetase) (Cell proliferation-inducing gene 32 protein) [Includes: Glutamate--tRNA ligase (EC 6.1.1.17) (Glutamyl-tRNA synthetase) (GluRS); Proline--tRNA ligase (EC 6.1.1.15) (Prolyl-tRNA synthetase)]	EPRS GLNS PARS QARS QPRS PIG32	LSQSSDSSPTRNSEP	1.065	1.15875	0.0908534	0.212568	1.07794	1.03708	0.10827	0.0525271	1710000000	431000000	1820000000	372000000	3530000000	803000000	9.54777	8.90472	5389	28144	CMGC/MAPK	Erk1
P07814	1	Bifunctional aminoacyl-tRNA synthetase OS=Homo sapiens GN=EPRS PE=1 SV=3 - [SYEP_HUMAN]	P07814	T888	Bifunctional glutamate/proline--tRNA ligase (Bifunctional aminoacyl-tRNA synthetase) (Cell proliferation-inducing gene 32 protein) [Includes: Glutamate--tRNA ligase (EC 6.1.1.17) (Glutamyl-tRNA synthetase) (GluRS); Proline--tRNA ligase (EC 6.1.1.15) (Prolyl-tRNA synthetase)]	EPRS GLNS PARS QARS QPRS PIG32	QSSDSSPTRNSEPAG	1.065	1.16144	0.0908534	0.215915	1.07794	1.03949	0.10827	0.0558744	1710000000	423000000	1820000000	364000000	3530000000	787000000	9.54777	8.89597	5389	24117	AGC/DMPK/ROCK	ROCK1, ROCK2
P07900	1	Heat shock protein HSP 90-alpha OS=Homo sapiens GN=HSP90AA1 PE=1 SV=5 - [HS90A_HUMAN]	P07900	S263	Heat shock protein HSP 90-alpha (Heat shock 86 kDa) (HSP 86) (HSP86) (Renal carcinoma antigen NY-REN-38)	HSP90AA1 HSP90A HSPC1 HSPCA	PEIEDVGSDEEEEKK	1.107	1.23457	0.146655	0.304006	1.12045	1.10494	0.164072	0.143966	6720000000	4880000000	7440000000	3950000000	14160000000	8830000000	10.1511	9.94596	43034	78737
P07900	1	Heat shock protein HSP 90-alpha OS=Homo sapiens GN=HSP90AA1 PE=1 SV=5 - [HS90A_HUMAN]	P07900	S453	Heat shock protein HSP 90-alpha (Heat shock 86 kDa) (HSP 86) (HSP86) (Renal carcinoma antigen NY-REN-38)	HSP90AA1 HSP90A HSPC1 HSPCA	KLGIHEDSQNRKKLS	1.166	0.808407	0.221568	-0.306846	1.18016	0.723525	0.238985	-0.466886	7460000	3960000	8700000	4900000	16160000	8860000	7.20844	6.94743	91576	168716
P07910	1	Heterogeneous nuclear ribonucleoproteins C1/C2 OS=Homo sapiens GN=HNRNPC PE=1 SV=4 - [HNRPC_HUMAN]	P07910	S233	Heterogeneous nuclear ribonucleoproteins C1/C2 (hnRNP C1/C2)	HNRNPC HNRPC	VEMKNDKSEEEQSSS	0.947	1.17096	-0.0785637	0.227692	0.958502	1.04801	-0.0611466	0.0676516	209000000	73600000	198000000	62800000	407000000	136400000	8.60959	8.13481	42269	67608
P07910	1	Heterogeneous nuclear ribonucleoproteins C1/C2 OS=Homo sapiens GN=HNRNPC PE=1 SV=4 - [HNRPC_HUMAN]	P07910	S241	Heterogeneous nuclear ribonucleoproteins C1/C2 (hnRNP C1/C2)	HNRNPC HNRPC	EEEQSSSSVKKDETN	1.184	1.21507	0.243669	0.281036	1.19838	1.08748	0.261086	0.120995	67500000	24500000	79900000	20200000	147400000	44700000	8.1685	7.65031	42242	65250
P07910	1	Heterogeneous nuclear ribonucleoproteins C1/C2 OS=Homo sapiens GN=HNRNPC PE=1 SV=4 - [HNRPC_HUMAN]	P07910	S260	Heterogeneous nuclear ribonucleoproteins C1/C2 (hnRNP C1/C2)	HNRNPC HNRPC	SEGGADDSAEEGDLL	0.848	1.31406	-0.237864	0.394032	0.8583	1.17608	-0.220447	0.233991	349000000	703000000	296000000	535000000	645000000	1238000000	8.80956	9.09272	83708	56170
P07948	1	Tyrosine-protein kinase Lyn OS=Homo sapiens GN=LYN PE=1 SV=3 - [LYN_HUMAN]	P07948	S11	Tyrosine-protein kinase Lyn (EC 2.7.10.2) (Lck/Yes-related novel protein tyrosine kinase) (V-yes-1 Yamaguchi sarcoma viral related oncogene homolog) (p53Lyn) (p56Lyn)	LYN JTK8	IKSKGKDSLSDDGVD	0.796	1.49031	-0.32916	0.575615	0.805668	1.33383	-0.311743	0.415575	48400000	29300000	38500000	19700000	86900000	49000000	7.93902	7.6902	79120	51767	STE/STE11	MAP3K3
P07948	1	Tyrosine-protein kinase Lyn OS=Homo sapiens GN=LYN PE=1 SV=3 - [LYN_HUMAN]	P07948	S13	Tyrosine-protein kinase Lyn (EC 2.7.10.2) (Lck/Yes-related novel protein tyrosine kinase) (V-yes-1 Yamaguchi sarcoma viral related oncogene homolog) (p53Lyn) (p56Lyn)	LYN JTK8	SKGKDSLSDDGVDLK	1.035	1.08225	0.0496308	0.114035	1.04757	0.968615	0.0670478	-0.0460052	139000000	108000000	144000000	100000000	283000000	208000000	8.45179	8.31806	36759	51514
P08107	1	Heat shock 70 kDa protein 1 OS=Homo sapiens GN=HSPA1A PE=1 SV=5 - [HSP71_HUMAN]	P08107	S631	Heat shock 70 kDa protein 1A/1B (Heat shock 70 kDa protein 1/2) (HSP70-1/HSP70-2) (HSP70.1/HSP70.2)	HSPA1A HSPA1; HSPA1B	AQGPKGGSGSGPTIE	1.339	1.07181	0.421156	0.100051	1.35526	0.959271	0.438573	-0.0599894	2980000	5800000	3990000	5410000	6970000	11210000	6.84323	7.04961	18678	92912	Atypical/PDHK	PDHK4
P08237	1	6-phosphofructokinase, muscle type OS=Homo sapiens GN=PFKM PE=1 SV=2 - [K6PF_HUMAN]	P08237	S667	6-phosphofructokinase, muscle type (EC 2.7.1.11) (Phosphofructo-1-kinase isozyme A) (PFK-A) (Phosphofructokinase-M) (Phosphofructokinase 1) (Phosphohexokinase)	PFKM PFKX	GHMQQGGSPTPFDRN	0.957	1.25	-0.0634092	0.321928	0.968623	1.11875	-0.0459921	0.161888	19900000	4090000	19000000	3270000	38900000	7360000	7.58995	6.86688	40749	145301
P08238	1	Heat shock protein HSP 90-beta OS=Homo sapiens GN=HSP90AB1 PE=1 SV=4 - [HS90B_HUMAN]	P08238	S255	Heat shock protein HSP 90-beta (HSP 90) (Heat shock 84 kDa) (HSP 84) (HSP84)	HSP90AB1 HSP90B HSPC2 HSPCB	PKIEDVGSDEEDDSG	1.355	1.21065	0.438293	0.275786	1.37146	1.08354	0.45571	0.115746	505000000	30300000	684000000	25000000	1189000000	55300000	9.07518	7.74273	44840	150655	Other/CK2	CK2a2
P08559;P29803	2	Pyruvate dehydrogenase E1 component subunit alpha, somatic form, mitochondrial OS=Homo sapiens GN=PDHA1 PE=1 SV=3 - [ODPA_HUMAN]|Pyruvate dehydrogenase E1 component subunit alpha, testis-specific form, mitochondrial OS=Homo sapiens GN=PDHA2 PE=1 SV=1 - [ODPAT_HUMAN]	P08559	S293	Pyruvate dehydrogenase E1 component subunit alpha, somatic form, mitochondrial (EC 1.2.4.1) (PDHE1-A type I)	PDHA1 PHE1A	TYRYHGHSMSDPGVS	0.671	1.38122	-0.575615	0.465938	0.67915	1.23619	-0.558198	0.305898	288000000	52400000	193000000	37900000	481000000	90300000	8.68215	7.95569	52505	83520			P29803	S291	Pyruvate dehydrogenase E1 component subunit alpha, testis-specific form, mitochondrial (EC 1.2.4.1) (PDHE1-A type II)	PDHA2 PDHAL
P08581	1	Hepatocyte growth factor receptor OS=Homo sapiens GN=MET PE=1 SV=3 - [MET_HUMAN]	P08581	S990	Hepatocyte growth factor receptor (HGF receptor) (EC 2.7.10.1) (HGF/SF receptor) (Proto-oncogene c-Met) (Scatter factor receptor) (SF receptor) (Tyrosine-protein kinase Met)	MET	LVSARSVSPTTEMVS	0.998	1.20337	-0.00288828	0.26708	1.01012	1.07702	0.0145288	0.107039	4440000	8030000	4430000	6670000	8870000	14700000	6.94792	7.16732	105181	104089	Atypical/PIKK/FRAP	FRAP
P08581	1	Hepatocyte growth factor receptor OS=Homo sapiens GN=MET PE=1 SV=3 - [MET_HUMAN]	P08581	T977	Hepatocyte growth factor receptor (HGF receptor) (EC 2.7.10.1) (HGF/SF receptor) (Proto-oncogene c-Met) (Scatter factor receptor) (SF receptor) (Tyrosine-protein kinase Met)	MET	RYDARVHTPHLDRLV	0.654	0.965251	-0.612637	-0.051024	0.661943	0.8639	-0.59522	-0.211064	6270000	15800000	4100000	16400000	10370000	32200000	7.01578	7.50786	54783	85680	Atypical/PIKK/FRAP	FRAP
P08621	1	U1 small nuclear ribonucleoprotein 70 kDa OS=Homo sapiens GN=SNRP70 PE=1 SV=2 - [RU17_HUMAN]	P08621	S226	U1 small nuclear ribonucleoprotein 70 kDa (U1 snRNP 70 kDa) (U1-70K) (snRNP70)	SNRNP70 RNPU1Z RPU1 SNRP70 U1AP1	YDERPGPSPLPHRDR	1.056	1.23762	0.0786098	0.307573	1.06883	1.10767	0.0960269	0.147532	406000000	804000000	429000000	649000000	835000000	1453000000	8.92169	9.16227	47865	72907	CMGC/CDK/CDC2	CDK2
P08621	1	U1 small nuclear ribonucleoprotein 70 kDa OS=Homo sapiens GN=SNRP70 PE=1 SV=2 - [RU17_HUMAN]	P08621	S320	U1 small nuclear ribonucleoprotein 70 kDa (U1 snRNP 70 kDa) (U1-70K) (snRNP70)	SNRNP70 RNPU1Z RPU1 SNRP70 U1AP1	GGDMAEPSEAGDAPP	0.954	1.11235	-0.0679388	0.153607	0.965587	0.995551	-0.0505218	-0.00643343	15000000	24300000	14300000	21800000	29300000	46100000	7.46687	7.6637	101299	100732
P08621	1	U1 small nuclear ribonucleoprotein 70 kDa OS=Homo sapiens GN=SNRP70 PE=1 SV=2 - [RU17_HUMAN]	P08621	S410	U1 small nuclear ribonucleoprotein 70 kDa (U1 snRNP 70 kDa) (U1-70K) (snRNP70)	SNRNP70 RNPU1Z RPU1 SNRP70 U1AP1	LEGLGNDSRDMYMES	1.144	1.37363	0.194087	0.45799	1.15789	1.2294	0.211504	0.297949	50500000	21700000	57800000	15800000	108300000	37500000	8.03463	7.57403	4373	27084
P08648	1	Integrin alpha-5 OS=Homo sapiens GN=ITGA5 PE=1 SV=2 - [ITA5_HUMAN]	P08648	S1047	Integrin alpha-5 (CD49 antigen-like family member E) (Fibronectin receptor subunit alpha) (Integrin alpha-F) (VLA-5) (CD antigen CD49e) [Cleaved into: Integrin alpha-5 heavy chain; Integrin alpha-5 light chain]	ITGA5 FNRA	QLKPPATSDA*****	0.999	1.08578	-0.00144342	0.118727	1.01113	0.97177	0.0159736	-0.0413135	40700000	32700000	40700000	30100000	81400000	62800000	7.91062	7.79796	72985	31411
P08648	1	Integrin alpha-5 OS=Homo sapiens GN=ITGA5 PE=1 SV=2 - [ITA5_HUMAN]	P08648	S127	Integrin alpha-5 (CD49 antigen-like family member E) (Fibronectin receptor subunit alpha) (Integrin alpha-F) (VLA-5) (CD antigen CD49e) [Cleaved into: Integrin alpha-5 heavy chain; Integrin alpha-5 light chain]	ITGA5 FNRA	LLESSLSSSEGEEPV	1.008	1.07991	0.0114956	0.110916	1.02024	0.966523	0.0289127	-0.0491245	3480000000	1040000000	3510000000	967000000	6990000000	2007000000	9.84448	9.30255	5706	28525	TKL/RAF	RAF1
P08648	1	Integrin alpha-5 OS=Homo sapiens GN=ITGA5 PE=1 SV=2 - [ITA5_HUMAN]	P08648	T1046	Integrin alpha-5 (CD49 antigen-like family member E) (Fibronectin receptor subunit alpha) (Integrin alpha-F) (VLA-5) (CD antigen CD49e) [Cleaved into: Integrin alpha-5 heavy chain; Integrin alpha-5 light chain]	ITGA5 FNRA	AQLKPPATSDA****	0.99	1.01112	-0.0144996	0.0159576	1.00202	0.904954	0.00291748	-0.144083	53300000	10000000	52800000	9920000	106100000	19920000	8.02572	7.29929	12967	33234
P08651	1	Nuclear factor 1 C-type OS=Homo sapiens GN=NFIC PE=1 SV=2 - [NFIC_HUMAN]	P08651	S323	Nuclear factor 1 C-type (NF1-C) (Nuclear factor 1/C) (CCAAT-box-binding transcription factor) (CTF) (Nuclear factor I/C) (NF-I/C) (NFI-C) (TGGCA-binding protein)	NFIC NFI	DMEGGISSPVKKTEM	1.337	1.11982	0.418999	0.163268	1.35324	1.00224	0.436417	0.00322751	129000000	166000000	172000000	149000000	301000000	315000000	8.47857	8.49831	5034	27846	CMGC/CDK/CDC2	CDC2
P08651	1	Nuclear factor 1 C-type OS=Homo sapiens GN=NFIC PE=1 SV=2 - [NFIC_HUMAN]	P08651	S333	Nuclear factor 1 C-type (NF1-C) (Nuclear factor 1/C) (CCAAT-box-binding transcription factor) (CTF) (Nuclear factor I/C) (NF-I/C) (NFI-C) (TGGCA-binding protein)	NFIC NFI	KKTEMDKSPFNSPSP	0.94	0.853242	-0.0892673	-0.228973	0.951417	0.763652	-0.0718503	-0.389013	73400000	23300000	69000000	27300000	142400000	50600000	8.15351	7.70415	47688	165180	CMGC/CDK/CDC2	CDC2
P08651	1	Nuclear factor 1 C-type OS=Homo sapiens GN=NFIC PE=1 SV=2 - [NFIC_HUMAN]	P08651	S339	Nuclear factor 1 C-type (NF1-C) (Nuclear factor 1/C) (CCAAT-box-binding transcription factor) (CTF) (Nuclear factor I/C) (NF-I/C) (NFI-C) (TGGCA-binding protein)	NFIC NFI	KSPFNSPSPQDSPRL	1.07	1.0989	0.0976108	0.136062	1.083	0.983516	0.115028	-0.0239789	385000000	210000000	412000000	191000000	797000000	401000000	8.90146	8.60314	4045	26754	CMGC/GSK	GSK3A
P08651	1	Nuclear factor 1 C-type OS=Homo sapiens GN=NFIC PE=1 SV=2 - [NFIC_HUMAN]	P08651	S343	Nuclear factor 1 C-type (NF1-C) (Nuclear factor 1/C) (CCAAT-box-binding transcription factor) (CTF) (Nuclear factor I/C) (NF-I/C) (NFI-C) (TGGCA-binding protein)	NFIC NFI	NSPSPQDSPRLSSFT	3.659	1.3369	1.87145	0.41889	3.70344	1.19652	1.88887	0.258849	20700000	23400000	75600000	17500000	96300000	40900000	7.98363	7.61172	104629	26688	CMGC/GSK	GSK3A
P08670	1	Vimentin OS=Homo sapiens GN=VIM PE=1 SV=4 - [VIME_HUMAN]	P08670	S144	Vimentin	VIM	QLKGQGKSRLGDLYE	1.249	1.11732	0.320773	0.16004	1.26417	1	0.338191	0	20700000	25600000	25900000	22900000	46600000	48500000	7.66839	7.68574	40850	145191
P08670	1	Vimentin OS=Homo sapiens GN=VIM PE=1 SV=4 - [VIME_HUMAN]	P08670	S214	Vimentin	VIM	RQDVDNASLARLDLE	1.022	1.16009	0.0313952	0.21424	1.03441	1.03828	0.0488122	0.0541998	302000000	179000000	309000000	154000000	611000000	333000000	8.78604	8.52244	3427	26036
P08670	1	Vimentin OS=Homo sapiens GN=VIM PE=1 SV=4 - [VIME_HUMAN]	P08670	S22	Vimentin	VIM	FGGPGTASRPSSSRS	1.024	1.09409	0.0342157	0.129734	1.03644	0.979212	0.0516328	-0.0303065	16100000	63300000	16500000	57900000	32600000	121200000	7.51322	8.0835	52426	57469
P08670	1	Vimentin OS=Homo sapiens GN=VIM PE=1 SV=4 - [VIME_HUMAN]	P08670	S25	Vimentin	VIM	PGTASRPSSSRSYVT	1.396	1.13766	0.481299	0.186065	1.41296	1.0182	0.498716	0.0260245	167000000	150000000	233000000	131000000	400000000	281000000	8.60206	8.44871	39825	59928	CAMK/PKD	PKD1, PKD2, PKD3
P08670	1	Vimentin OS=Homo sapiens GN=VIM PE=1 SV=4 - [VIME_HUMAN]	P08670	S26	Vimentin	VIM	GTASRPSSSRSYVTT	1.396	1.28866	0.481299	0.365871	1.41296	1.15335	0.498716	0.205831	167000000	90600000	233000000	70300000	400000000	160900000	8.60206	8.20656	39825	54070	TKL/STKR	ALK1
P08670	1	Vimentin OS=Homo sapiens GN=VIM PE=1 SV=4 - [VIME_HUMAN]	P08670	S299	Vimentin	VIM	KSKFADLSEAANRNN	1.078	0.959693	0.108357	-0.0593553	1.09109	0.858925	0.125774	-0.219396	13600000	1960000	14700000	2040000	28300000	4000000	7.45179	6.60206	37668	131738	Other/AUR/AUR-B	AurB
P08670	1	Vimentin OS=Homo sapiens GN=VIM PE=1 SV=4 - [VIME_HUMAN]	P08670	S325	Vimentin	VIM	EYRRQVQSLTCEVDA	1.066	1.21655	0.0922074	0.28279	1.07895	1.08881	0.109624	0.122749	496000000	352000000	528000000	289000000	1024000000	641000000	9.0103	8.80686	6102	29488	AGC/AKT	AKT1
P08670	1	Vimentin OS=Homo sapiens GN=VIM PE=1 SV=4 - [VIME_HUMAN]	P08670	S34	Vimentin	VIM	SRSYVTTSTRTYSLG	1.381	1.39276	0.465713	0.477944	1.39777	1.24652	0.48313	0.317904	36000000	60800000	49700000	43600000	85700000	104400000	7.93298	8.0187	103843	113202	AGC/PKC	PKCa, PKCb, PKCd, PKCe, PKCg, PKCh, PKCi, PKCt, PKCz
P08670	1	Vimentin OS=Homo sapiens GN=VIM PE=1 SV=4 - [VIME_HUMAN]	P08670	S39	Vimentin	VIM	TTSTRTYSLGSALRP	1.27	1.44509	0.344828	0.531156	1.28543	1.29335	0.362246	0.371116	686000000	262000000	871000000	181000000	1557000000	443000000	9.19229	8.6464	37788	52685	CAMK/CAMK2	CaMK2d
P08670	1	Vimentin OS=Homo sapiens GN=VIM PE=1 SV=4 - [VIME_HUMAN]	P08670	S419	Vimentin	VIM	SLPLPNFSSLNLRET	0.888	0.928505	-0.171368	-0.107018	0.898785	0.831012	-0.153951	-0.267059	19400000	374000000	17200000	403000000	36600000	777000000	7.56348	8.89042	108189	121314	TKL/STKR	ALK1
P08670	1	Vimentin OS=Homo sapiens GN=VIM PE=1 SV=4 - [VIME_HUMAN]	P08670	S42	Vimentin	VIM	TRTYSLGSALRPSTS	0.868	1.13507	-0.204233	0.182786	0.878543	1.01589	-0.186816	0.0227457	127000000	100000000	110000000	88100000	237000000	188100000	8.37475	8.27439	37777	55680	AGC/PKC	PKCa, PKCb, PKCd, PKCe, PKCg, PKCh, PKCi, PKCt, PKCz
P08670	1	Vimentin OS=Homo sapiens GN=VIM PE=1 SV=4 - [VIME_HUMAN]	P08670	S420	Vimentin	VIM	LPLPNFSSLNLRETN	0.969	1.03842	-0.0454314	0.0543923	0.980769	0.929387	-0.0280144	-0.105648	62600000	1060000000	60600000	1020000000	123200000	2080000000	8.09061	9.31806	108154	30726	TKL/STKR	ALK1
P08670	1	Vimentin OS=Homo sapiens GN=VIM PE=1 SV=4 - [VIME_HUMAN]	P08670	S430	Vimentin	VIM	LRETNLDSLPLVDTH	0.784	0.859845	-0.351074	-0.217851	0.793522	0.769561	-0.333657	-0.377892	2790000000	1970000000	2190000000	2290000000	4980000000	4260000000	9.69723	9.62941	76855	56110
P08670	1	Vimentin OS=Homo sapiens GN=VIM PE=1 SV=4 - [VIME_HUMAN]	P08670	S438	Vimentin	VIM	LPLVDTHSKRTLLIK	1.007	0.943396	0.0100637	-0.0840643	1.01923	0.84434	0.0274807	-0.244105	31200000	99200000	31400000	105000000	62600000	204200000	7.79657	8.31006	34584	49342
P08670	1	Vimentin OS=Homo sapiens GN=VIM PE=1 SV=4 - [VIME_HUMAN]	P08670	S459	Vimentin	VIM	GQVINETSQHHDDLE	0.981	1.10011	-0.027675	0.137648	0.992915	0.984598	-0.0102579	-0.0223926	893000000	384000000	876000000	349000000	1769000000	733000000	9.24773	8.8651	30305	40865	Atypical/PIKK/ATM	ATM
P08670	1	Vimentin OS=Homo sapiens GN=VIM PE=1 SV=4 - [VIME_HUMAN]	P08670	S47	Vimentin	VIM	LGSALRPSTSRSLYA	1.032	1.01215	0.045443	0.0174171	1.04453	0.90587	0.06286	-0.142623	158000000	92700000	163000000	91500000	321000000	184200000	8.50651	8.26529	37626	52233	Other/AUR/AUR-B	AurB
P08670	1	Vimentin OS=Homo sapiens GN=VIM PE=1 SV=4 - [VIME_HUMAN]	P08670	S49	Vimentin	VIM	SALRPSTSRSLYASS	0.871	1.35685	-0.199255	0.440263	0.881579	1.21438	-0.181838	0.280223	213000000	101000000	185000000	74700000	398000000	175700000	8.59988	8.24477	37663	52278
P08670	1	Vimentin OS=Homo sapiens GN=VIM PE=1 SV=4 - [VIME_HUMAN]	P08670	S51	Vimentin	VIM	LRPSTSRSLYASSPG	1.033	1.12233	0.0468403	0.166503	1.04555	1.00449	0.0642573	0.00646225	114000000	269000000	118000000	239000000	232000000	508000000	8.36549	8.70586	67397	18488	STE/STE20	MINK, MYO3A, PAK2
P08670	1	Vimentin OS=Homo sapiens GN=VIM PE=1 SV=4 - [VIME_HUMAN]	P08670	S55	Vimentin	VIM	TSRSLYASSPGGVYA	0.933	0.996016	-0.100051	-0.00575927	0.944332	0.891434	-0.082634	-0.1658	6200000000	3140000000	5780000000	3160000000	11980000000	6300000000	10.0785	9.79934	4916	23833	AGC/DMPK/ROCK	ROCK1
P08670	1	Vimentin OS=Homo sapiens GN=VIM PE=1 SV=4 - [VIME_HUMAN]	P08670	S56	Vimentin	VIM	SRSLYASSPGGVYAT	0.933	1.01937	-0.100051	0.027675	0.944332	0.912334	-0.082634	-0.132365	6200000000	5020000000	5780000000	4920000000	11980000000	9940000000	10.0785	9.99739	4916	27887	Atypical/PIKK/FRAP	FRAP
P08670	1	Vimentin OS=Homo sapiens GN=VIM PE=1 SV=4 - [VIME_HUMAN]	P08670	S66	Vimentin	VIM	GVYATRSSAVRLRSS	0.935	1.01112	-0.0969617	0.0159576	0.946356	0.904954	-0.0795447	-0.144083	140000000	133000000	130000000	132000000	270000000	265000000	8.43136	8.42325	37120	52059	CAMK/PKD	PKD1, PKD2, PKD3
P08670	1	Vimentin OS=Homo sapiens GN=VIM PE=1 SV=4 - [VIME_HUMAN]	P08670	S72	Vimentin	VIM	SSAVRLRSSVPGVRL	1.082	1.22399	0.1137	0.291592	1.09514	1.09547	0.131118	0.131552	275000000	410000000	297000000	335000000	572000000	745000000	8.7574	8.87216	84622	65580	AGC/DMPK/ROCK	ROCK1
P08670	1	Vimentin OS=Homo sapiens GN=VIM PE=1 SV=4 - [VIME_HUMAN]	P08670	S73	Vimentin	VIM	SAVRLRSSVPGVRLL	1.082	1.22399	0.1137	0.291592	1.09514	1.09547	0.131118	0.131552	275000000	410000000	297000000	335000000	572000000	745000000	8.7574	8.87216	84622	65580	Other/AUR/AUR-B	AurB
P08670	1	Vimentin OS=Homo sapiens GN=VIM PE=1 SV=4 - [VIME_HUMAN]	P08670	T20	Vimentin	VIM	RMFGGPGTASRPSSS	0.951	1.1325	-0.0724828	0.179515	0.962551	1.01359	-0.0550657	0.0194742	275000000	90200000	262000000	79700000	537000000	169900000	8.72997	8.23019	39589	59664	CMGC/CDK/CDC2	CDC2
P08670	1	Vimentin OS=Homo sapiens GN=VIM PE=1 SV=4 - [VIME_HUMAN]	P08670	T436	Vimentin	VIM	DSLPLVDTHSKRTLL	1.033	1.14811	0.0468403	0.199255	1.04555	1.02755	0.0642573	0.039215	81300000	42600000	84000000	37100000	165300000	79700000	8.21827	7.90146	34525	49046
P08670	1	Vimentin OS=Homo sapiens GN=VIM PE=1 SV=4 - [VIME_HUMAN]	P08670	T48	Vimentin	VIM	GSALRPSTSRSLYAS	1.052	1.13895	0.0731347	0.187707	1.06478	1.01936	0.0905518	0.0276667	100000000	14600000	105000000	12800000	205000000	27400000	8.31175	7.43775	79657	61229	TKL/STKR	ALK1
P08670	1	Vimentin OS=Homo sapiens GN=VIM PE=1 SV=4 - [VIME_HUMAN]	P08670	Y117	Vimentin	VIM	LNDRFANYIDKVRFL	1.175	1.18483	0.232661	0.244685	1.18927	1.06043	0.250078	0.0846447	3690000	13600000	4340000	11500000	8030000	25100000	6.90472	7.39967	9835	56476	TK/Eph	EphA2, EphB6
P08670	1	Vimentin OS=Homo sapiens GN=VIM PE=1 SV=4 - [VIME_HUMAN]	P08670	Y53	Vimentin	VIM	PSTSRSLYASSPGGV	0.844	1.06383	-0.244685	0.0892673	0.854251	0.952128	-0.227268	-0.0707731	12600000	46400000	10700000	43600000	23300000	90000000	7.36736	7.95424	70664	27511	TK/Tie	TIE2
P08670	1	Vimentin OS=Homo sapiens GN=VIM PE=1 SV=4 - [VIME_HUMAN]	P08670	Y61	Vimentin	VIM	ASSPGGVYATRSSAV	1.195	1.17647	0.257011	0.234465	1.20951	1.05294	0.274428	0.0744248	58700000	88300000	70200000	75000000	128900000	163300000	8.11025	8.21299	4459	115922	TK/Eph	EphA2, EphB6
P08708	1	40S ribosomal protein S17 OS=Homo sapiens GN=RPS17 PE=1 SV=2 - [RS17_HUMAN]	P08708	S113	40S ribosomal protein S17	RPS17	LKLLDFGSLSNLQVT	0.963	1.06496	-0.0543923	0.0908029	0.974696	0.953142	-0.0369752	-0.0692375	12300000	204000000	11800000	192000000	24100000	396000000	7.38202	8.5977	108039	30571
P08729	1	Keratin, type II cytoskeletal 7 OS=Homo sapiens GN=KRT7 PE=1 SV=3 - [K2C7_HUMAN]	P08729	T289	Keratin, type II cytoskeletal 7 (Cytokeratin-7) (CK-7) (Keratin-7) (K7) (Sarcolectin) (Type-II keratin Kb7)	KRT7 SCL	WYQTKFETLQAQAGK	0.657	1.46413	-0.606035	0.550043	0.66498	1.3104	-0.588618	0.390002	2920000	9410000	1920000	6430000	4840000	15840000	6.68485	7.19976	70127	114873
P08865	1	40S ribosomal protein SA OS=Homo sapiens GN=RPSA PE=1 SV=4 - [RSSA_HUMAN]	P08865	S43	40S ribosomal protein SA (37 kDa laminin receptor precursor) (37LRP) (37/67 kDa laminin receptor) (LRP/LR) (67 kDa laminin receptor) (67LR) (Colon carcinoma laminin-binding protein) (Laminin receptor 1) (LamR) (Laminin-binding protein precursor p40) (LBP/p40) (Multidrug resistance-associated protein MGr1-Ag) (NEM/1CHD4)	RPSA LAMBR LAMR1	QYIYKRKSDGIYIIN	0.544	1.2837	-0.878321	0.360305	0.550607	1.14891	-0.860904	0.200264	521000	2870000	284000	2230000	805000	5100000	5.9058	6.70757	51765	79882	CAMK/DAPK	DAPK2
P09382	1	Galectin-1 OS=Homo sapiens GN=LGALS1 PE=1 SV=2 - [LEG1_HUMAN]	P09382	S30	Galectin-1 (Gal-1) (14 kDa laminin-binding protein) (HLBP14) (14 kDa lectin) (Beta-galactoside-binding lectin L-14-I) (Galaptin) (HBL) (HPL) (Lactose-binding lectin 1) (Lectin galactoside-binding soluble 1) (Putative MAPK-activating protein PM12) (S-Lac lectin 1)	LGALS1	EVAPDAKSFVLNLGK	1.174	0.958773	0.231432	-0.0607392	1.18826	0.858102	0.248849	-0.22078	22300000	24900000	26200000	25900000	48500000	50800000	7.68574	7.70586	6417	163751
P09543	1	2',3'-cyclic-nucleotide 3'-phosphodiesterase OS=Homo sapiens GN=CNP PE=1 SV=2 - [CN37_HUMAN]	P09543	S170	2',3'-cyclic-nucleotide 3'-phosphodiesterase (CNP) (CNPase) (EC 3.1.4.37)	CNP	EKNQWQLSADDLKKL	1.074	1.34409	0.102994	0.426625	1.08704	1.20296	0.120411	0.266585	35000000	12200000	37600000	9040000	72600000	21240000	7.86094	7.32715	5987	24706
P09543	1	2',3'-cyclic-nucleotide 3'-phosphodiesterase OS=Homo sapiens GN=CNP PE=1 SV=2 - [CN37_HUMAN]	P09543	S9	2',3'-cyclic-nucleotide 3'-phosphodiesterase (CNP) (CNPase) (EC 3.1.4.37)	CNP	NRGFSRKSHTFLPKI	1.292	1.56006	0.369606	0.641604	1.30769	1.39626	0.387023	0.481563	14100000	19200000	18200000	12300000	32300000	31500000	7.5092	7.49831	40404	159873	AGC/PKC	PKCd
P09601	1	Heme oxygenase 1 OS=Homo sapiens GN=HMOX1 PE=1 SV=1 - [HMOX1_HUMAN]	P09601	S229	Heme oxygenase 1 (HO-1) (EC 1.14.99.3)	HMOX1 HO HO1	THDTKDQSPSRAPGL	1.161	1.14943	0.215368	0.200913	1.1751	1.02874	0.232785	0.0408723	141000000	76000000	163000000	66200000	304000000	142200000	8.48287	8.1529	77678	50686	CMGC	CLK3
P09651	1	Heterogeneous nuclear ribonucleoprotein A1 OS=Homo sapiens GN=HNRNPA1 PE=1 SV=4 - [ROA1_HUMAN]	P09651	S364	Heterogeneous nuclear ribonucleoprotein A1 (hnRNP A1) (Helix-destabilizing protein) (Single-strand RNA-binding protein) (hnRNP core protein A1)	HNRNPA1 HNRPA1	YGGSSSSSSYGSGRR	1.132	1.19332	0.178874	0.254978	1.14575	1.06802	0.196291	0.0949374	192000000	193000000	217000000	161000000	409000000	354000000	8.61172	8.549	103651	112656
P09874	1	Poly [ADP-ribose] polymerase 1 OS=Homo sapiens GN=PARP1 PE=1 SV=4 - [PARP1_HUMAN]	P09874	S782	Poly [ADP-ribose] polymerase 1 (PARP-1) (EC 2.4.2.30) (NAD(+) ADP-ribosyltransferase 1) (ADPRT 1) (Poly[ADP-ribose] synthase 1)	PARP1 ADPRT PPOL	YSLLRGGSDDSSKDP	0.873	1.21212	-0.195946	0.277534	0.883603	1.08485	-0.178529	0.117494	21300000	8600000	18600000	7100000	39900000	15700000	7.60097	7.1959	33339	124787	CAMK/MAPKAPK	MAPKAPK2
P0C1Z6	1	TCF3 fusion partner OS=Homo sapiens GN=TFPT PE=1 SV=1 - [TFPT_HUMAN]	P0C1Z6	S180	TCF3 fusion partner (INO80 complex subunit F) (Protein FB1)	TFPT INO80F	PAPPEPGSPAPGEGP	0.991	1.08696	-0.013043	0.120294	1.00304	0.972826	0.00437402	-0.0397462	80200000	72100000	79500000	66400000	159700000	138500000	8.2033	8.14145	35638	50768	CMGC/CDK/CDC2	CDK2
[truncated: 5,636 more rows]
[truncated: 54 more columns]
