# Supplementary material for: Quantitative global phosphoproteomics of human umbilical vein endothelial cells after activation of the Rap signaling pathway
Source: Royal Society of Chemistry journal article supplement (doi:10.1039/c3mb25524g), 2013-01-21
Supplement: c3mb25524g_9.xlsx [file c3mb25524g_9.xlsx]

## Sheet: Quant. Class I Phosphosites Rev
Protein Group Accessions	# of Protein Groups	Protein Descriptions	Acc. # 1	Sites Acc. # 1	Protein Names Acc. # 1	Gene Names Acc. # 1	Phosposite Sequence Context	Ratio (Light/Medium)	Log2 Ratio (Light/Medium)	Normalized Ratio (Light/Medium)	Normalized Log2 Ratio (Light/Medium)	Intensity Light	IntensityMedium	Intensity (Light+Medium)	Log10 Intensity (Light+Medium)	Quan Result ID	Predicted Kinase Group/Family/Subfamily	Predicted Kinases	Peptide Sequence	# of Phospho-sites	pRS Site Probabilities	pRS Score	Experiment Identifed	Class Type	Acc. # 2	Sites Acc. # 2	Protein Names Acc. # 2	Gene Names Acc. # 2	Acc. # 3	Sites Acc. # 3	Protein Names Acc. # 3	Gene Names Acc. # 3	Acc. # 4	Sites Acc. # 4	Protein Names Acc. # 4	Gene Names Acc. # 4	Acc. # 5	Sites Acc. # 5	Protein Names Acc. # 5	Gene Names Acc. # 5	Acc. # 6	Sites Acc. # 6	Protein Names Acc. # 6	Gene Names Acc. # 6	Acc. # 7	Sites Acc. # 7	Protein Names Acc. # 7	Gene Names Acc. # 7	Acc. # 8
A0FGR8	1	Extended synaptotagmin-2 OS=Homo sapiens GN=FAM62B PE=1 SV=1 - [ESYT2_HUMAN]	A0FGR8	S739	Extended synaptotagmin-2 (E-Syt2) (Chr2Syt)	ESYT2 FAM62B KIAA1228	DLGRSSSSLLASPGH	0.909091	-0.137504	0.813636	-0.297544	11800000	13000000	24800000	7.39445	52253			SSSpSLLASPGHISVK	1	S(1): 0.0; S(2): 0.0; S(3): 0.0; S(4): 100.0; S(8): 0.0; S(13): 0.0	259	Reverse	Class I
A0FGR8	1	Extended synaptotagmin-2 OS=Homo sapiens GN=FAM62B PE=1 SV=1 - [ESYT2_HUMAN]	A0FGR8	S755	Extended synaptotagmin-2 (E-Syt2) (Chr2Syt)	ESYT2 FAM62B KIAA1228	SVKEPTPSIASDISL	1.17509	0.232769	1.0517	0.0727286	7890000	6720000	14610000	7.16465	120850			EPTPpSIASDISLPIATQELR	1	T(3): 6.5; S(5): 80.6; S(8): 6.5; S(11): 6.5; T(16): 0.0	79	Reverse	Class I
A0FGR8	1	Extended synaptotagmin-2 OS=Homo sapiens GN=FAM62B PE=1 SV=1 - [ESYT2_HUMAN]	A0FGR8	S758	Extended synaptotagmin-2 (E-Syt2) (Chr2Syt)	ESYT2 FAM62B KIAA1228	EPTPSIASDISLPIA	1.34048	0.422752	1.19973	0.262712	9720000	7250000	16970000	7.22968	98376			EPTPSIApSDIpSLPIATQELR	2	T(3): 0.0; S(5): 0.0; S(8): 100.0; S(11): 100.0; T(16): 0.0	213	Reverse	Class I
A0FGR8	1	Extended synaptotagmin-2 OS=Homo sapiens GN=FAM62B PE=1 SV=1 - [ESYT2_HUMAN]	A0FGR8	S761	Extended synaptotagmin-2 (E-Syt2) (Chr2Syt)	ESYT2 FAM62B KIAA1228	PSIASDISLPIATQE	1.34048	0.422752	1.19973	0.262712	9720000	7250000	16970000	7.22968	98376			EPTPSIApSDIpSLPIATQELR	2	T(3): 0.0; S(5): 0.0; S(8): 100.0; S(11): 100.0; T(16): 0.0	213	Reverse	Class I
A0JLT2	1	Mediator of RNA polymerase II transcription subunit 19 OS=Homo sapiens GN=MED19 PE=1 SV=2 - [MED19_HUMAN]	A0JLT2	S194	Mediator of RNA polymerase II transcription subunit 19 (Lung cancer metastasis-related protein 1) (Mediator complex subunit 19)	MED19 LCMR1	PVPPETPSDSDHKKK	1.58983	0.668868	1.42289	0.508828	12100000	7620000	19720000	7.29491	47035			TQDPVPPETPpSDSDHK	1	T(1): 0.0; T(9): 0.0; S(11): 100.0; S(13): 0.0	211	Reverse	Class I
A0JNW5	1	UHRF1-binding protein 1-like OS=Homo sapiens GN=UHRF1BP1L PE=1 SV=2 - [UH1BL_HUMAN]	A0JNW5	S935	UHRF1-binding protein 1-like	UHRF1BP1L KIAA0701	MSDNRSMSVDLSHIP	1.03093	0.0439433	0.92268	-0.116097	5310000	5150000	10460000	7.01953	143047			SMpSVDLSHIPLKDPLLFK	1	S(1): 10.7; S(3): 89.3; S(7): 0.0	114	Reverse	Class I
A0JNW5	1	UHRF1-binding protein 1-like OS=Homo sapiens GN=UHRF1BP1L PE=1 SV=2 - [UH1BL_HUMAN]	A0JNW5	S989	UHRF1-binding protein 1-like	UHRF1BP1L KIAA0701	GLVYKSGSGEIGSET	1.04167	0.0588937	0.932292	-0.101147	882000	847000	1729000	6.23779	129183			SGpSGEIGSETSDKK	1	S(1): 0.3; S(3): 99.7; S(8): 0.0; T(10): 0.0; S(11): 0.0	266	Reverse	Class I
A0MZ66	1	Shootin-1 OS=Homo sapiens GN=KIAA1598 PE=1 SV=3 - [SHOT1_HUMAN]	A0MZ66	S506	Shootin-1	KIAA1598	LATSESKSMPVLGSV	1.40647	0.492079	1.25879	0.332038	105000000	74700000	179700000	8.25455	18541			pSMPVLGSVSSVTK	1	S(1): 100.0; S(7): 0.0; S(9): 0.0; S(10): 0.0; T(12): 0.0	52	Reverse	Class I
A1A4S6	1	Rho GTPase-activating protein 10 OS=Homo sapiens GN=ARHGAP10 PE=1 SV=1 - [RHG10_HUMAN]	A1A4S6	S589	Rho GTPase-activating protein 10 (GTPase regulator associated with focal adhesion kinase 2) (Graf-related protein 2) (Rho-type GTPase-activating protein 10)	ARHGAP10 GRAF2	FPEPTCLSASPPNAP	1.00301	0.00433459	0.897693	-0.155706	24600000	24600000	49200000	7.69197	111049			TPPDTTFPEPTCLpSASPPNAPPR	1	T(1): 0.0; T(5): 0.0; T(6): 0.0; T(11): 0.0; S(14): 99.2; S(16): 0.8	182	Reverse	Class I
A1A4S6	1	Rho GTPase-activating protein 10 OS=Homo sapiens GN=ARHGAP10 PE=1 SV=1 - [RHG10_HUMAN]	A1A4S6	S591	Rho GTPase-activating protein 10 (GTPase regulator associated with focal adhesion kinase 2) (Graf-related protein 2) (Rho-type GTPase-activating protein 10)	ARHGAP10 GRAF2	EPTCLSASPPNAPPR	3.41297	1.77103	3.05461	1.61099	76300000	22300000	98600000	7.99388	29147			TPPDTTFPEPTCLSApSPPNAPPR	1	T(1): 0.0; T(5): 0.0; T(6): 0.0; T(11): 0.0; S(14): 0.1; S(16): 99.9	97	Reverse	Class I
A1L170	1	Uncharacterized protein FLJ13137 OS=Homo sapiens PE=1 SV=1 - [YA022_HUMAN]	A1L170	S223	Uncharacterized protein C1orf226	C1orf226	TECRRASSPSLIERN	0.977517	-0.0328061	0.874878	-0.192847	21000000	21500000	42500000	7.62839	26827			ASpSPSLIER	1	S(2): 0.2; S(3): 99.8; S(5): 0.0	98	Reverse	Class I
A1L390	1	Pleckstrin homology domain-containing family G member 3 OS=Homo sapiens GN=PLEKHG3 PE=1 SV=1 - [PKHG3_HUMAN]	A1L390	S76	Pleckstrin homology domain-containing family G member 3 (PH domain-containing family G member 3)	PLEKHG3 KIAA0599	LNVKGPLSPFNSRAA	0.84317	-0.246104	0.754637	-0.406144	16200000	19200000	35400000	7.549	28346			GPLpSPFNSR	1	S(4): 100.0; S(8): 0.0	75	Reverse	Class I
A1X283	1	SH3 and PX domain-containing protein 2B OS=Homo sapiens GN=SH3PXD2B PE=1 SV=2 - [SPD2B_HUMAN]	A1X283	S528	SH3 and PX domain-containing protein 2B (Adapter protein HOFI) (Factor for adipocyte differentiation 49) (Tyrosine kinase substrate with four SH3 domains)	SH3PXD2B FAD49 KIAA1295 TKS4	SLPPRKESIIKSEGE	2.0202	1.0145	1.80808	0.854459	2250000	1120000	3370000	6.52763	148802			KEpSIIKSEGELLER	1	S(3): 100.0; S(7): 0.0	234	Reverse	Class I
A1X283	1	SH3 and PX domain-containing protein 2B OS=Homo sapiens GN=SH3PXD2B PE=1 SV=2 - [SPD2B_HUMAN]	A1X283	S720	SH3 and PX domain-containing protein 2B (Adapter protein HOFI) (Factor for adipocyte differentiation 49) (Tyrosine kinase substrate with four SH3 domains)	SH3PXD2B FAD49 KIAA1295 TKS4	TGKQDGLSPKEISCR	0.75643	-0.402722	0.677005	-0.562763	12600000	16600000	29200000	7.46538	143499			TGKQDGLpSPK	1	T(1): 0.0; S(8): 100.0	111	Reverse	Class I
A1X283	1	SH3 and PX domain-containing protein 2B OS=Homo sapiens GN=SH3PXD2B PE=1 SV=2 - [SPD2B_HUMAN]	A1X283	S811	SH3 and PX domain-containing protein 2B (Adapter protein HOFI) (Factor for adipocyte differentiation 49) (Tyrosine kinase substrate with four SH3 domains)	SH3PXD2B FAD49 KIAA1295 TKS4	AKPFLSNSLGGQDDT	1.36986	0.454032	1.22603	0.293991	1960000	1430000	3390000	6.5302	166501			AKPFLSNpSLGGQDDTRGK	1	S(6): 0.1; S(8): 99.9; T(15): 0.0	159	Reverse	Class I
A1XBS5	1	Protein FAM92A1 OS=Homo sapiens GN=FAM92A1 PE=2 SV=2 - [F92A1_HUMAN]	A1XBS5	T282	Protein FAM92A1	FAM92A1	EDDELDVTEEENFLK	0.554939	-0.849599	0.49667	-1.00964	493000	889000	1382000	6.14051	11297			DQQAEDDEDDELDVpTEEENFLK	1	T(15): 100.0	89	Reverse	Class I
A2A3K4	1	Protein tyrosine phosphatase domain-containing protein 1 OS=Homo sapiens GN=PTPDC1 PE=2 SV=1 - [PTPC1_HUMAN]	A2A3K4	S394	Protein tyrosine phosphatase domain-containing protein 1 (EC 3.1.3.-)	PTPDC1 PTP9Q22	LKRRLSYSDSDLKRA	0.90009	-0.151859	0.805581	-0.311899	1680000	1860000	3540000	6.549	104613			LSYpSDSDLK	1	S(2): 0.1; Y(3): 3.3; S(4): 96.5; S(6): 0.0	99	Reverse	Class I
A2AJT9	1	Uncharacterized protein CXorf23 OS=Homo sapiens GN=CXorf23 PE=1 SV=1 - [CX023_HUMAN]	A2AJT9	S402	Uncharacterized protein CXorf23	CXorf23	KLPDVKPSPINLRKK	1.08108	0.112475	0.967568	-0.0475657	4770000	4410000	9180000	6.96284	163200			SQKLPDVKPpSPINLR	1	S(1): 0.0; S(10): 100.0	116	Reverse	Class I
A2RRP1	1	Neuroblastoma-amplified gene protein OS=Homo sapiens GN=NAG PE=1 SV=1 - [NAG_HUMAN]	A2RRP1	S349	Neuroblastoma-amplified sequence (Neuroblastoma-amplified gene protein)	NBAS NAG	LSIWAIPSLKQQGEW	0.881834	-0.181421	0.789242	-0.341461	851000	965000	1816000	6.25912	163431			LSIWAIPpSLK	1	S(2): 0.8; S(8): 99.2	61	Reverse	Class I
A2RRP1	1	Neuroblastoma-amplified gene protein OS=Homo sapiens GN=NAG PE=1 SV=1 - [NAG_HUMAN]	A2RRP1	S473	Neuroblastoma-amplified sequence (Neuroblastoma-amplified gene protein)	NBAS NAG	EDEGEEDSDSDYEIS	1.03093	0.0439433	0.92268	-0.116097	92200000	89500000	181700000	8.25935	17454			AGEEDEGEEDpSDSDYEISAK	1	S(11): 99.8; S(13): 0.2; Y(15): 0.0; S(18): 0.0	196	Reverse	Class I
A2RRP1	1	Neuroblastoma-amplified gene protein OS=Homo sapiens GN=NAG PE=1 SV=1 - [NAG_HUMAN]	A2RRP1	S475	Neuroblastoma-amplified sequence (Neuroblastoma-amplified gene protein)	NBAS NAG	EGEEDSDSDYEISAK	1.05932	0.0831412	0.948093	-0.0768992	89100000	84100000	173200000	8.23855	103628			AGEEDEGEEDSDpSDYEISAK	1	S(11): 0.0; S(13): 100.0; Y(15): 0.0; S(18): 0.0	147	Reverse	Class I
A2RUS2	1	DENN domain-containing protein 3 OS=Homo sapiens GN=DENND3 PE=2 SV=2 - [DEND3_HUMAN]	A2RUS2	S472	DENN domain-containing protein 3	DENND3 KIAA0870	THRRMVVSMPNLQDI	0.884956	-0.176323	0.792035	-0.336363	5000000	5650000	10650000	7.02735	119939			MVVpSMPNLQDIAMPELAPR	1	S(4): 100.0	111	Reverse	Class I
A2RUS2	1	DENN domain-containing protein 3 OS=Homo sapiens GN=DENND3 PE=2 SV=2 - [DEND3_HUMAN]	A2RUS2	S490	DENN domain-containing protein 3	DENND3 KIAA0870	ELAPRNSSLRLTDTA	0.853971	-0.227741	0.764304	-0.387781	7610000	8910000	16520000	7.21801	60444			NSpSLRLTDTAGCR	1	S(2): 0.0; S(3): 100.0; T(7): 0.0; T(9): 0.0	209	Reverse	Class I
A3KMH1	1	Uncharacterized protein KIAA0564 OS=Homo sapiens GN=KIAA0564 PE=2 SV=2 - [K0564_HUMAN]	A3KMH1	S1707	Uncharacterized protein KIAA0564	KIAA0564	ELEPQLGSPQQKPKR	1.06157	0.086201	0.950106	-0.0738394	23800000	22400000	46200000	7.66464	88998			RRGELEPQLGpSPQQKPK	1	S(11): 100.0	144	Reverse	Class I
A3KN83	1	Protein strawberry notch homolog 1 OS=Homo sapiens GN=SBNO1 PE=1 SV=1 - [SBNO1_HUMAN]	A3KN83	S212	Protein strawberry notch homolog 1 (Monocyte protein 3) (MOP-3)	SBNO1 MOP3	INDMKMRSFSPTMKV	1.17233	0.229382	1.04924	0.0693419	58100000	49600000	107700000	8.03222	23249			pSFSPTMK	1	S(1): 99.4; S(3): 0.6; T(5): 0.0	101	Reverse	Class I
A3KN83	1	Protein strawberry notch homolog 1 OS=Homo sapiens GN=SBNO1 PE=1 SV=1 - [SBNO1_HUMAN]	A3KN83	S214	Protein strawberry notch homolog 1 (Monocyte protein 3) (MOP-3)	SBNO1 MOP3	DMKMRSFSPTMKVPV	1.17233	0.229382	1.04924	0.0693419	58100000	49600000	107700000	8.03222	23249			SFpSPTMK	1	S(1): 0.3; S(3): 99.7; T(5): 0.0	122	Reverse	Class I
A5PKW4	1	PH and SEC7 domain-containing protein 1 OS=Homo sapiens GN=PSD PE=2 SV=2 - [PSD1_HUMAN]	A5PKW4	T622	PH and SEC7 domain-containing protein 1 (Exchange factor for ARF6) (Pleckstrin homology and SEC7 domain-containing protein 1)	PSD EFA6 KIAA2011 PSD1 TYL	ELALMGETQERERVL	1.10375	0.142417	0.987859	-0.0176234	18900000	17200000	36100000	7.55751	77564			ELALMGEpTQERER	1	T(8): 100.0	152	Reverse	Class I
A5PL33	1	Protein KRBA1 OS=Homo sapiens GN=KRBA1 PE=2 SV=2 - [KRBA1_HUMAN]	A5PL33	S177	Protein KRBA1	KRBA1 KIAA1862	GALGGEPSPPTHSPS	0.521105	-0.940355	0.466389	-1.1004	1330000	2550000	3880000	6.58883	124178			EGPGALGGEPpSPPTHSPSR	1	S(11): 84.8; T(14): 7.2; S(16): 7.2; S(18): 0.7	56	Reverse	Class I
A5YKK6	1	CCR4-NOT transcription complex subunit 1 OS=Homo sapiens GN=CNOT1 PE=1 SV=2 - [CNOT1_HUMAN]	A5YKK6	S1061	CCR4-NOT transcription complex subunit 1 (CCR4-associated factor 1) (Negative regulator of transcription subunit 1 homolog) (NOT1H) (hNOT1)	CNOT1 CDC39 KIAA1007 NOT1 AD-005	VTRPTGVSFKKDVPP	1.20337	0.26708	1.07702	0.107039	2990000	2480000	5470000	6.73799	162802			TVTVTRPTGVpSFKK	1	T(1): 0.0; T(3): 0.0; T(5): 0.0; T(8): 0.0; S(11): 100.0	162	Reverse	Class I
A6ND36	1	Protein FAM83G OS=Homo sapiens GN=FAM83G PE=1 SV=2 - [FA83G_HUMAN]	A6ND36	S356	Protein FAM83G	FAM83G	YALVKAKSVDEIAKI	1.13636	0.184425	1.01705	0.0243842	41800000	36700000	78500000	7.89487	133628			AKpSVDEIAK	1	S(3): 100.0	143	Reverse	Class I
A6ND36	1	Protein FAM83G OS=Homo sapiens GN=FAM83G PE=1 SV=2 - [FA83G_HUMAN]	A6ND36	S760	Protein FAM83G	FAM83G	RLLPDPGSPRLAQNA	0.576369	-0.794936	0.51585	-0.954976	8310000	14400000	22710000	7.35622	23277			LLPDPGpSPR	1	S(7): 100.0	69	Reverse	Class I
A6NFI3	1	Zinc finger protein 316 OS=Homo sapiens GN=ZNF316 PE=3 SV=1 - [ZN316_HUMAN]	A6NFI3	S112	Zinc finger protein 316	ZNF316	SRGGDAKSPVLQEKG	1.02987	0.0424568	0.92173	-0.117584	13700000	13300000	27000000	7.43136	50665			GGDAKpSPVLQEK	1	S(6): 100.0	296	Reverse	Class I
A6NI79	1	Coiled-coil domain-containing protein 69 OS=Homo sapiens GN=CCDC69 PE=2 SV=1 - [CCD69_HUMAN]	A6NI79	S241	Coiled-coil domain-containing protein 69	CCDC69	VVLSRQLSEDLLLTR	2.73973	1.45403	2.45205	1.29399	603000	220000	823000	5.9154	119905			QLpSEDLLLTR	1	S(3): 100.0; T(9): 0.0	84	Reverse	Class I
A6NIX2	1	Wilms tumor protein 1-interacting protein OS=Homo sapiens GN=WTIP PE=2 SV=2 - [WTIP_HUMAN]	A6NIX2	S312	Wilms tumor protein 1-interacting protein (WT1-interacting protein)	WTIP	LSAQPAGSPRASLAG	0.481464	-1.0545	0.43091	-1.21454	4400000	9140000	13540000	7.13162	116570			AAVPELSAQPAGpSPR	1	S(7): 0.0; S(13): 100.0	159	Reverse	Class I
A6NJ09	1	Putative RUNDC2-like protein 2 OS=Homo sapiens PE=4 SV=2 - [RUN2M_HUMAN]	A6NJ09	S191	Deleted	Deleted	YQKLDVKSIDDEDVD	1.30039	0.378944	1.16385	0.218904	17300000	13300000	30600000	7.48572	140384			LDVKpSIDDEDVDENEDDVYGNSSGRK	1	S(5): 100.0; Y(19): 0.0; S(22): 0.0; S(23): 0.0	108	Reverse	Class I
A6NK07;P20042	2	Eukaryotic translation initiation factor 2 subunit 2-like protein OS=Homo sapiens PE=2 SV=1 - [IF2BL_HUMAN]|Eukaryotic translation initiation factor 2 subunit 2 OS=Homo sapiens GN=EIF2S2 PE=1 SV=2 - [IF2B_HUMAN]	A6NK07	S2	Deleted	Deleted	******MSGDEMIFD	1.03627	0.0513992	0.927461	-0.108641	10800000	10400000	21200000	7.32634	100874	Other/CK2	CK2a1, CK2a2	pSGDEMIFDPTMSK	1	S(1): 100.0; T(10): 0.0; S(12): 0.0	104	Reverse	Class I	P20042	S2	Eukaryotic translation initiation factor 2 subunit 2 (Eukaryotic translation initiation factor 2 subunit beta) (eIF-2-beta)	EIF2S2 EIF2B
A6NK07;P20042	2	Eukaryotic translation initiation factor 2 subunit 2-like protein OS=Homo sapiens PE=2 SV=1 - [IF2BL_HUMAN]|Eukaryotic translation initiation factor 2 subunit 2 OS=Homo sapiens GN=EIF2S2 PE=1 SV=2 - [IF2B_HUMAN]	A6NK07	S67	Deleted	Deleted	DTRKKDASDDLDDLN	1.44092	0.526992	1.28963	0.366952	4760000	3300000	8060000	6.90634	153009	Other/CK2	CK2a1, CK2a2	KKDApSDDLDDLNFFNQK	1	S(5): 100.0	264	Reverse	Class I	P20042	S67	Eukaryotic translation initiation factor 2 subunit 2 (Eukaryotic translation initiation factor 2 subunit beta) (eIF-2-beta)	EIF2S2 EIF2B
A6NK07;P20042	2	Eukaryotic translation initiation factor 2 subunit 2-like protein OS=Homo sapiens PE=2 SV=1 - [IF2BL_HUMAN]|Eukaryotic translation initiation factor 2 subunit 2 OS=Homo sapiens GN=EIF2S2 PE=1 SV=2 - [IF2B_HUMAN]	A6NK07	T111	Deleted	Deleted	ESDVQEPTEPEDDLD	1.10865	0.148801	0.992239	-0.0112398	55100000	49700000	104800000	8.02036	29648	Other/CK2	CK2a1, CK2a2	IESDVQEPpTEPEDDLDIMLGNK	1	S(3): 0.0; T(9): 100.0	99	Reverse	Class I	P20042	T111	Eukaryotic translation initiation factor 2 subunit 2 (Eukaryotic translation initiation factor 2 subunit beta) (eIF-2-beta)	EIF2S2 EIF2B
A6NKB4	1	UPF0634 protein E OS=Homo sapiens PE=2 SV=3 - [U634E_HUMAN]	A6NKB4	T66	Deleted	Deleted	RLRLEIDTIKHQNRE	1.00806	0.011588	0.902218	-0.148452	20000000	19900000	39900000	7.60097	59585			LRLEIDpTIK	1	T(7): 100.0	113	Reverse	Class I
A6NKC9	1	Putative SH2 domain-containing protein LOC646892 OS=Homo sapiens PE=4 SV=2 - [YO025_HUMAN]	A6NKC9	S209	SH2 domain-containing protein 7	SH2D7	DVSPRNLSQEESMEA	1.16279	0.217591	1.0407	0.057551	6820000	5860000	12680000	7.10312	138914			NLpSQEEpSMEAPIR	2	S(3): 100.0; S(7): 100.0	148	Reverse	Class I
A6NKC9	1	Putative SH2 domain-containing protein LOC646892 OS=Homo sapiens PE=4 SV=2 - [YO025_HUMAN]	A6NKC9	S213	SH2 domain-containing protein 7	SH2D7	RNLSQEESMEAPIRV	1.16279	0.217591	1.0407	0.057551	6820000	5860000	12680000	7.10312	138914			NLpSQEEpSMEAPIR	2	S(3): 100.0; S(7): 100.0	148	Reverse	Class I
A6NKD9	1	Coiled-coil domain-containing protein 85C OS=Homo sapiens GN=CCDC85C PE=3 SV=1 - [CC85C_HUMAN]	A6NKD9	S246	Coiled-coil domain-containing protein 85C	CCDC85C	KAGATRRSLDDLSAP	1.23001	0.298673	1.10086	0.138632	55000000	44700000	99700000	7.9987	169329			pSLDDLSAPPHHR	1	S(1): 100.0; S(6): 0.0	179	Reverse	Class I
A6NKD9	1	Coiled-coil domain-containing protein 85C OS=Homo sapiens GN=CCDC85C PE=3 SV=1 - [CC85C_HUMAN]	A6NKD9	S258	Coiled-coil domain-containing protein 85C	CCDC85C	SAPPHHRSIPNGLHD	0.940734	-0.0881416	0.841957	-0.248182	8360000	8880000	17240000	7.23654	135698			pSIPNGLHDPSSTYIR	1	S(1): 100.0; S(10): 0.0; S(11): 0.0; T(12): 0.0; Y(13): 0.0	191	Reverse	Class I
A6NKQ3	1	Uncharacterized protein ENSP00000361571 OS=Homo sapiens PE=4 SV=2 - [YA046_HUMAN]	A6NKQ3	S204	Replaced by: Q96MR6 = WD repeat-containing protein 65	WDR65	GIMRKKFSSLQKEIE	11.236	3.49005	10.0562	3.33001	7620000	681000	8301000	6.91913	86964			KKFpSSLQK	1	S(4): 100.0; S(5): 0.0	127	Reverse	Class I
A6NKT7;Q7Z3J3;Q53T03;P49792;Q99666;O14715	6	RANBP2-like and GRIP domain-containing protein 3 OS=Homo sapiens GN=RGPD3 PE=2 SV=1 - [RGPD3_HUMAN]|RANBP2-like and GRIP domain-containing protein 4 OS=Homo sapiens GN=RGPD4 PE=2 SV=2 - [RGPD4_HUMAN]|RANBP2-like and GRIP domain-containing protein 6 OS=Homo sapiens GN=RGPD6 PE=1 SV=1 - [RGPD6_HUMAN]|E3 SUMO-protein ligase RanBP2 OS=Homo sapiens GN=RANBP2 PE=1 SV=2 - [RBP2_HUMAN]|RANBP2-like and GR…	A6NKT7	S1479	RanBP2-like and GRIP domain-containing protein 3	RGPD3 RGP3	SLITPHVSRSSTPRE	1.20192	0.265345	1.07572	0.105304	21600000	17900000	39500000	7.5966	128058			DSLITPHVpSR	1	S(2): 0.0; T(5): 0.0; S(9): 100.0	147	Reverse	Class I	Q7Z3J3	S1479	RanBP2-like and GRIP domain-containing protein 4	RGPD4 RGP4
A6NKT7;Q7Z3J3;P49792;O14715	4	RANBP2-like and GRIP domain-containing protein 3 OS=Homo sapiens GN=RGPD3 PE=2 SV=1 - [RGPD3_HUMAN]|RANBP2-like and GRIP domain-containing protein 4 OS=Homo sapiens GN=RGPD4 PE=2 SV=2 - [RGPD4_HUMAN]|E3 SUMO-protein ligase RanBP2 OS=Homo sapiens GN=RANBP2 PE=1 SV=2 - [RBP2_HUMAN]|RANBP2-like and GRIP domain-containing protein 8 (Fragment) OS=Homo sapiens GN=RGPD8 PE=1 SV=1 - [RGPD8_HUMAN]	A6NKT7	S1535	RanBP2-like and GRIP domain-containing protein 3	RGPD3 RGP3	TTTKAVVSPPKFVFG	1.17509	0.232769	1.0517	0.0727286	31800000	27000000	58800000	7.76938	126310			AVVpSPPKFVFGSESVK	1	S(4): 100.0; S(12): 0.0; S(14): 0.0	212	Reverse	Class I	Q7Z3J3	S1535	RanBP2-like and GRIP domain-containing protein 4	RGPD4 RGP4
A6NKT7;Q7Z3J3;Q53T03;P49792;Q99666	5	RANBP2-like and GRIP domain-containing protein 3 OS=Homo sapiens GN=RGPD3 PE=2 SV=1 - [RGPD3_HUMAN]|RANBP2-like and GRIP domain-containing protein 4 OS=Homo sapiens GN=RGPD4 PE=2 SV=2 - [RGPD4_HUMAN]|RANBP2-like and GRIP domain-containing protein 6 OS=Homo sapiens GN=RGPD6 PE=1 SV=1 - [RGPD6_HUMAN]|E3 SUMO-protein ligase RanBP2 OS=Homo sapiens GN=RANBP2 PE=1 SV=2 - [RBP2_HUMAN]|RANBP2-like and GR…	A6NKT7	S789	RanBP2-like and GRIP domain-containing protein 3	RGPD3 RGP3	SPTKYSLSPSKSYKY	1.23609	0.305788	1.1063	0.145748	99200000	80200000	179400000	8.25382	22708			YSLpSPSK	1	Y(1): 1.0; S(2): 1.0; S(4): 98.0; S(6): 0.0	67	Reverse	Class I	Q7Z3J3	S789	RanBP2-like and GRIP domain-containing protein 4	RGPD4 RGP4
A6NKT7;Q53T03;P49792;Q99666;O14715	5	RANBP2-like and GRIP domain-containing protein 3 OS=Homo sapiens GN=RGPD3 PE=2 SV=1 - [RGPD3_HUMAN]|RANBP2-like and GRIP domain-containing protein 6 OS=Homo sapiens GN=RGPD6 PE=1 SV=1 - [RGPD6_HUMAN]|E3 SUMO-protein ligase RanBP2 OS=Homo sapiens GN=RANBP2 PE=1 SV=2 - [RBP2_HUMAN]|RANBP2-like and GRIP domain-containing protein 5 OS=Homo sapiens GN=RGPD5 PE=2 SV=2 - [RGPD5_HUMAN]|RANBP2-like and GR…	A6NKT7	T1178	RanBP2-like and GRIP domain-containing protein 3	RGPD3 RGP3	LLDIPLQTPHKLVDT	0.971817	-0.041243	0.869776	-0.201283	4740000	4880000	9620000	6.98318	126339			LLLDIPLQpTPHK	1	T(9): 100.0	212	Reverse	Class I	Q53T03	T1177	Replaced by: Q99666 = RANBP2-like and GRIP domain-containing protein 5/6 (Ran-binding protein 2-like 1/2) (RanBP2-like 1/2) (RanBP2L1) (RanBP2L2) (Sperm membrane protein BS-63)	RGPD5 RANBP2L1 RGP5 RGP7 RGPD7; RGPD6 RANBP2L2 RGP6
A6NKT7;Q7Z3J3;Q53T03;P49792;Q99666;O14715	6	RANBP2-like and GRIP domain-containing protein 3 OS=Homo sapiens GN=RGPD3 PE=2 SV=1 - [RGPD3_HUMAN]|RANBP2-like and GRIP domain-containing protein 4 OS=Homo sapiens GN=RGPD4 PE=2 SV=2 - [RGPD4_HUMAN]|RANBP2-like and GRIP domain-containing protein 6 OS=Homo sapiens GN=RGPD6 PE=1 SV=1 - [RGPD6_HUMAN]|E3 SUMO-protein ligase RanBP2 OS=Homo sapiens GN=RANBP2 PE=1 SV=2 - [RBP2_HUMAN]|RANBP2-like and GR…	A6NKT7	T1475	RanBP2-like and GRIP domain-containing protein 3	RGPD3 RGP3	QEKDSLITPHVSRSS	1.20192	0.265345	1.07572	0.105304	21600000	17900000	39500000	7.5966	128058			DSLIpTPHVSR	1	S(2): 0.0; T(5): 99.2; S(9): 0.8	67	Reverse	Class I	Q7Z3J3	T1475	RanBP2-like and GRIP domain-containing protein 4	RGPD4 RGP4
A6NKT7;Q7Z3J3;P49792	3	RANBP2-like and GRIP domain-containing protein 3 OS=Homo sapiens GN=RGPD3 PE=2 SV=1 - [RGPD3_HUMAN]|RANBP2-like and GRIP domain-containing protein 4 OS=Homo sapiens GN=RGPD4 PE=2 SV=2 - [RGPD4_HUMAN]|E3 SUMO-protein ligase RanBP2 OS=Homo sapiens GN=RANBP2 PE=1 SV=2 - [RBP2_HUMAN]	A6NKT7	T800	RanBP2-like and GRIP domain-containing protein 3	RGPD3 RGP3	SYKYSPKTPPRWAED	1.17786	0.236164	1.05418	0.0761231	38500000	32700000	71200000	7.85248	158899	Atypical/PIKK/FRAP	FRAP	YSPKpTPPR	1	Y(1): 0.0; S(2): 0.7; T(5): 99.3	57	Reverse	Class I	Q7Z3J3	T800	RanBP2-like and GRIP domain-containing protein 4	RGPD4 RGP4
A6NKT7;Q7Z3J3;Q53T03;P49792;Q99666	5	RANBP2-like and GRIP domain-containing protein 3 OS=Homo sapiens GN=RGPD3 PE=2 SV=1 - [RGPD3_HUMAN]|RANBP2-like and GRIP domain-containing protein 4 OS=Homo sapiens GN=RGPD4 PE=2 SV=2 - [RGPD4_HUMAN]|RANBP2-like and GRIP domain-containing protein 6 OS=Homo sapiens GN=RGPD6 PE=1 SV=1 - [RGPD6_HUMAN]|E3 SUMO-protein ligase RanBP2 OS=Homo sapiens GN=RANBP2 PE=1 SV=2 - [RBP2_HUMAN]|RANBP2-like and GR…	A6NKT7	Y786	RanBP2-like and GRIP domain-containing protein 3	RGPD3 RGP3	STPSPTKYSLSPSKS	1.23609	0.305788	1.1063	0.145748	99200000	80200000	179400000	8.25382	22708			pYSLSPSK	1	Y(1): 98.8; S(2): 0.6; S(4): 0.6; S(6): 0.0	36	Reverse	Class I	Q7Z3J3	Y786	RanBP2-like and GRIP domain-containing protein 4	RGPD4 RGP4
A6NM11	1	Leucine-rich repeat-containing protein 37A2 OS=Homo sapiens GN=LRRC37A2 PE=2 SV=2 - [L37A2_HUMAN]	A6NM11	S1208	Leucine-rich repeat-containing protein 37A2	LRRC37A2	AEEKRLGSPAPREVE	0.44484	-1.16864	0.398132	-1.32868	1330000	3000000	4330000	6.63649	113017			LGpSPAPR	1	S(3): 100.0	54	Reverse	Class I
A6NMZ7	1	Collagen alpha-6(VI) chain OS=Homo sapiens GN=COL6A6 PE=2 SV=2 - [CO6A6_HUMAN]	A6NMZ7	T308	Collagen alpha-6(VI) chain	COL6A6	PRTGKAYTGAAIKKL	1.07066	0.0985055	0.958244	-0.0615349	293000	274000	567000	5.75358	105050			ApYpTGAAIK	2	Y(2): 100.0; T(3): 100.0	81	Reverse	Class I
A6NMZ7	1	Collagen alpha-6(VI) chain OS=Homo sapiens GN=COL6A6 PE=2 SV=2 - [CO6A6_HUMAN]	A6NMZ7	Y307	Collagen alpha-6(VI) chain	COL6A6	SPRTGKAYTGAAIKK	1.07066	0.0985055	0.958244	-0.0615349	293000	274000	567000	5.75358	105050			ApYpTGAAIK	2	Y(2): 100.0; T(3): 100.0	81	Reverse	Class I
A7E2V4	1	Zinc finger SWIM domain-containing protein KIAA0913 OS=Homo sapiens GN=KIAA0913 PE=1 SV=1 - [K0913_HUMAN]	A7E2V4	S1130	Zinc finger SWIM domain-containing protein KIAA0913	KIAA0913	YNGRGWGSPGRPKKK	0.821693	-0.283329	0.735415	-0.44337	3100000	3770000	6870000	6.83696	62575			GWGpSPGRPK	1	S(4): 100.0	102	Reverse	Class I
A7E2V4	1	Zinc finger SWIM domain-containing protein KIAA0913 OS=Homo sapiens GN=KIAA0913 PE=1 SV=1 - [K0913_HUMAN]	A7E2V4	S53	Zinc finger SWIM domain-containing protein KIAA0913	KIAA0913	KQSAGPNSPTGGGGG	0.834725	-0.260628	0.747078	-0.420668	785000	941000	1726000	6.23704	107884			QSAGPNpSPTGGGGGGGSGGTR	1	S(2): 0.0; S(7): 100.0; T(9): 0.0; S(17): 0.0; T(20): 0.0	163	Reverse	Class I
A7KAX9	1	Rho/Cdc42/Rac GTPase-activating protein RICS OS=Homo sapiens GN=RICS PE=1 SV=1 - [RICS_HUMAN]	A7KAX9	S587	Rho GTPase-activating protein 32 (Brain-specific Rho GTPase-activating protein) (GAB-associated Cdc42/Rac GTPase-activating protein) (GC-GAP) (GTPase regulator interacting with TrkA) (Rho-type GTPase-activating protein 32) (Rho/Cdc42/Rac GTPase-activating protein RICS) (RhoGAP involved in the beta-catenin-N-cadherin and NMDA receptor signaling) (p200RhoGAP) (p250GAP)	ARHGAP32 GRIT KIAA0712 RICS	ASLSRPKSLLVSSPS	1.94932	0.962969	1.74464	0.802929	3160000	1620000	4780000	6.67943	17936			pSLLVSSPSTK	1	S(1): 99.9; S(5): 0.0; S(6): 0.0; S(8): 0.0; T(9): 0.0	60	Reverse	Class I
A7KAX9	1	Rho/Cdc42/Rac GTPase-activating protein RICS OS=Homo sapiens GN=RICS PE=1 SV=1 - [RICS_HUMAN]	A7KAX9	S706	Rho GTPase-activating protein 32 (Brain-specific Rho GTPase-activating protein) (GAB-associated Cdc42/Rac GTPase-activating protein) (GC-GAP) (GTPase regulator interacting with TrkA) (Rho-type GTPase-activating protein 32) (Rho/Cdc42/Rac GTPase-activating protein RICS) (RhoGAP involved in the beta-catenin-N-cadherin and NMDA receptor signaling) (p200RhoGAP) (p250GAP)	ARHGAP32 GRIT KIAA0712 RICS	GTLRSAKSEESLTSL	1.11359	0.155213	0.996659	-0.00482776	7680000	6890000	14570000	7.16346	162818			SAKpSEESLTSLHAVDGDSK	1	S(1): 0.0; S(4): 100.0; S(7): 0.0; T(9): 0.0; S(10): 0.0; S(18): 0.0	183	Reverse	Class I
A7KAX9	1	Rho/Cdc42/Rac GTPase-activating protein RICS OS=Homo sapiens GN=RICS PE=1 SV=1 - [RICS_HUMAN]	A7KAX9	S871	Rho GTPase-activating protein 32 (Brain-specific Rho GTPase-activating protein) (GAB-associated Cdc42/Rac GTPase-activating protein) (GC-GAP) (GTPase regulator interacting with TrkA) (Rho-type GTPase-activating protein 32) (Rho/Cdc42/Rac GTPase-activating protein RICS) (RhoGAP involved in the beta-catenin-N-cadherin and NMDA receptor signaling) (p200RhoGAP) (p250GAP)	ARHGAP32 GRIT KIAA0712 RICS	PFFTLDLSPTEDKSS	1.14155	0.190997	1.02169	0.0309568	4250000	3720000	7970000	6.90146	121307			LSPFFTLDLpSPTEDK	1	S(2): 0.0; T(6): 0.0; S(10): 99.9; T(12): 0.1	152	Reverse	Class I
A7KAX9	1	Rho/Cdc42/Rac GTPase-activating protein RICS OS=Homo sapiens GN=RICS PE=1 SV=1 - [RICS_HUMAN]	A7KAX9	S892	Rho GTPase-activating protein 32 (Brain-specific Rho GTPase-activating protein) (GAB-associated Cdc42/Rac GTPase-activating protein) (GC-GAP) (GTPase regulator interacting with TrkA) (Rho-type GTPase-activating protein 32) (Rho/Cdc42/Rac GTPase-activating protein RICS) (RhoGAP involved in the beta-catenin-N-cadherin and NMDA receptor signaling) (p200RhoGAP) (p250GAP)	ARHGAP32 GRIT KIAA0712 RICS	EKVVYAFSPKIGRKL	0.96432	-0.0524159	0.863067	-0.212456	36700000	38100000	74800000	7.8739	28254			VVYAFpSPK	1	Y(3): 0.3; S(6): 99.7	76	Reverse	Class I
A7KAX9	1	Rho/Cdc42/Rac GTPase-activating protein RICS OS=Homo sapiens GN=RICS PE=1 SV=1 - [RICS_HUMAN]	A7KAX9	T949	Rho GTPase-activating protein 32 (Brain-specific Rho GTPase-activating protein) (GAB-associated Cdc42/Rac GTPase-activating protein) (GC-GAP) (GTPase regulator interacting with TrkA) (Rho-type GTPase-activating protein 32) (Rho/Cdc42/Rac GTPase-activating protein RICS) (RhoGAP involved in the beta-catenin-N-cadherin and NMDA receptor signaling) (p200RhoGAP) (p250GAP)	ARHGAP32 GRIT KIAA0712 RICS	CVEERDATNRSPTQI	1.0929	0.128156	0.978142	-0.0318841	10400000	9500000	19900000	7.29885	123737			DApTNRSPTQIVK	1	T(3): 98.6; S(6): 0.7; T(8): 0.7	69	Reverse	Class I
A7KAX9	1	Rho/Cdc42/Rac GTPase-activating protein RICS OS=Homo sapiens GN=RICS PE=1 SV=1 - [RICS_HUMAN]	A7KAX9	Y889	Rho GTPase-activating protein 32 (Brain-specific Rho GTPase-activating protein) (GAB-associated Cdc42/Rac GTPase-activating protein) (GC-GAP) (GTPase regulator interacting with TrkA) (Rho-type GTPase-activating protein 32) (Rho/Cdc42/Rac GTPase-activating protein RICS) (RhoGAP involved in the beta-catenin-N-cadherin and NMDA receptor signaling) (p200RhoGAP) (p250GAP)	ARHGAP32 GRIT KIAA0712 RICS	SFTEKVVYAFSPKIG	0.538503	-0.892974	0.48196	-1.05301	212000	394000	606000	5.78247	157495			VVpYAFSPK	1	Y(3): 99.8; S(6): 0.2	71	Reverse	Class I
A7MCY6	1	TANK-binding kinase 1-binding protein OS=Homo sapiens GN=TBKBP1 PE=2 SV=1 - [TBKB1_HUMAN]	A7MCY6	S504	TANK-binding kinase 1-binding protein 1 (TBK1-binding protein 1)	TBKBP1 KIAA0775	YGPGRPLSPRRAFEG	1.0395	0.0558912	0.930353	-0.104149	48400000	46500000	94900000	7.97727	55553			AYGSELYGPGRPLpSPR	1	Y(2): 0.0; S(4): 0.0; Y(7): 0.0; S(14): 100.0	230	Reverse	Class I
A8CG34	1	Nuclear envelope pore membrane protein POM 121C OS=Homo sapiens GN=POM121C PE=1 SV=2 - [P121C_HUMAN]	A8CG34	S370	Nuclear envelope pore membrane protein POM 121C (Nuclear pore membrane protein 121-2) (POM121-2) (Pore membrane protein of 121 kDa C)	POM121C	NKRSRSSSMSSLTGA	0.744048	-0.426533	0.665923	-0.586574	472000	634000	1106000	6.04376	100863			SSpSMSSLTGAYTSGIPSSSR	1	S(1): 0.3; S(2): 0.3; S(3): 99.2; S(5): 0.3; S(6): 0.0; T(8): 0.0; Y(11): 0.0; T(12): 0.0; S(13): 0.0; S(17): 0.0; S(18): 0.0; S(19): 0.0	218	Reverse	Class I
A8CG34	1	Nuclear envelope pore membrane protein POM 121C OS=Homo sapiens GN=POM121C PE=1 SV=2 - [P121C_HUMAN]	A8CG34	S373	Nuclear envelope pore membrane protein POM 121C (Nuclear pore membrane protein 121-2) (POM121-2) (Pore membrane protein of 121 kDa C)	POM121C	SRSSSMSSLTGAYTS	1.27551	0.351074	1.14158	0.191034	11500000	8980000	20480000	7.31133	97047			SSpSMSpSLTGAYTSGIPSSSR	2	S(1): 0.5; S(2): 0.5; S(3): 98.4; S(5): 1.1; S(6): 99.5; T(8): 0.0; Y(11): 0.0; T(12): 0.0; S(13): 0.0; S(17): 0.0; S(18): 0.0; S(19): 0.0	263	Reverse	Class I
A8MUU9	1	Putative uncharacterized protein ENSP00000383309 OS=Homo sapiens PE=5 SV=3 - [YV023_HUMAN]	A8MUU9	T199	Putative uncharacterized protein ENSP00000383309		SRASLTRTPPTASLT	1.06724	0.093879	0.955176	-0.0661614	12600000	11800000	24400000	7.38739	11051			pTPPTASLTRASR	1	T(1): 99.5; T(4): 0.2; S(6): 0.2; T(8): 0.0; S(11): 0.0	53	Reverse	Class I
A8MW92	1	Tudor domain-containing protein PHF20L1 OS=Homo sapiens GN=PHF20L1 PE=1 SV=1 - [P20LX_HUMAN]	A8MW92	S437	PHD finger protein 20-like protein 1	PHF20L1 CGI-72	DSVEKVSSPSPATDG	1.14943	0.200913	1.02874	0.0408723	28100000	24400000	52500000	7.72016	112097			VSpSPSPATDGK	1	S(2): 4.4; S(3): 91.3; S(5): 4.4; T(8): 0.0	81	Reverse	Class I
A8MWC7	1	Putative neugrin-like protein OS=Homo sapiens PE=5 SV=2 - [NGRNL_HUMAN]	A8MWC7	S137	Putative neugrin-like protein		KYSSDCESIRRTGHG	1.29199	0.369595	1.15633	0.209554	2150000	1670000	3820000	6.58206	93192			KLQKYSSDCEpSIR	1	Y(5): 0.3; S(6): 0.3; S(7): 0.3; S(11): 99.0	82	Reverse	Class I
B2RTY4	1	Myosin-IXa OS=Homo sapiens GN=MYO9A PE=1 SV=1 - [MYO9A_HUMAN]	B2RTY4	S1258	Unconventional myosin-IXa (Unconventional myosin-9a)	MYO9A MYR7	LVRERPRSLEDLHQK	1.58479	0.664288	1.41838	0.504248	2100000	1320000	3420000	6.53403	93436	CAMK/MLCK	smMLCK	ERPRpSLEDLHQK	1	S(5): 100.0	274	Reverse	Class I
O00116	1	Alkyldihydroxyacetonephosphate synthase, peroxisomal OS=Homo sapiens GN=AGPS PE=1 SV=1 - [ADAS_HUMAN]	O00116	S589	Alkyldihydroxyacetonephosphate synthase, peroxisomal (Alkyl-DHAP synthase) (EC 2.5.1.26) (Aging-associated gene 5 protein) (Alkylglycerone-phosphate synthase)	AGPS AAG5	AFNYRGISDPLTVFE	0.82713	-0.273814	0.740281	-0.433855	660000	797000	1457000	6.16346	107670			GIpSDPLTVFEQTEAAAR	1	S(3): 100.0; T(7): 0.0; T(12): 0.0	163	Reverse	Class I
O00116	1	Alkyldihydroxyacetonephosphate synthase, peroxisomal OS=Homo sapiens GN=AGPS PE=1 SV=1 - [ADAS_HUMAN]	O00116	S65	Alkyldihydroxyacetonephosphate synthase, peroxisomal (Alkyl-DHAP synthase) (EC 2.5.1.26) (Aging-associated gene 5 protein) (Alkylglycerone-phosphate synthase)	AGPS AAG5	CKARRAASAATAAPT	1.10497	0.14401	0.98895	-0.0160301	43700000	39600000	83300000	7.92065	17521	Other/IKK	TBK1	AApSAATAAPTATPAAQESGTIPK	1	S(3): 91.0; T(6): 8.9; T(10): 0.1; T(12): 0.0; S(18): 0.0; T(20): 0.0	100	Reverse	Class I
O00116	1	Alkyldihydroxyacetonephosphate synthase, peroxisomal OS=Homo sapiens GN=AGPS PE=1 SV=1 - [ADAS_HUMAN]	O00116	T74	Alkyldihydroxyacetonephosphate synthase, peroxisomal (Alkyl-DHAP synthase) (EC 2.5.1.26) (Aging-associated gene 5 protein) (Alkylglycerone-phosphate synthase)	AGPS AAG5	ATAAPTATPAAQESG	1.16686	0.222633	1.04434	0.0625925	30500000	26100000	56600000	7.75282	114814			AASAATAAPTApTPAAQESGTIPK	1	S(3): 0.1; T(6): 0.9; T(10): 0.9; T(12): 98.0; S(18): 0.0; T(20): 0.0	79	Reverse	Class I
O00151	1	PDZ and LIM domain protein 1 OS=Homo sapiens GN=PDLIM1 PE=1 SV=4 - [PDLI1_HUMAN]	O00151	S130	PDZ and LIM domain protein 1 (C-terminal LIM domain protein 1) (Elfin) (LIM domain protein CLP-36)	PDLIM1 CLIM1 CLP36	SAMPFTASPASSTTA	0.840336	-0.250962	0.752101	-0.411002	174000000	207000000	381000000	8.58092	26815			SAMPFTApSPASSTTAR	1	S(1): 0.0; T(6): 0.0; S(8): 100.0; S(11): 0.0; S(12): 0.0; T(13): 0.0; T(14): 0.0	140	Reverse	Class I
O00151	1	PDZ and LIM domain protein 1 OS=Homo sapiens GN=PDLIM1 PE=1 SV=4 - [PDLI1_HUMAN]	O00151	S90	PDZ and LIM domain protein 1 (C-terminal LIM domain protein 1) (Elfin) (LIM domain protein CLP-36)	PDLIM1 CLIM1 CLP36	RSEHKVWSPLVTEEG	0.960615	-0.0579701	0.85975	-0.21801	116000000	120000000	236000000	8.37291	24439			VWpSPLVTEEGK	1	S(3): 100.0; T(7): 0.0	225	Reverse	Class I
O00151	1	PDZ and LIM domain protein 1 OS=Homo sapiens GN=PDLIM1 PE=1 SV=4 - [PDLI1_HUMAN]	O00151	T128	PDZ and LIM domain protein 1 (C-terminal LIM domain protein 1) (Elfin) (LIM domain protein CLP-36)	PDLIM1 CLIM1 CLP36	NRSAMPFTASPASST	0.892857	-0.163499	0.799107	-0.323539	80000000	89600000	169600000	8.22943	23919			SAMPFpTASPASSTTAR	1	S(1): 0.9; T(6): 98.2; S(8): 0.9; S(11): 0.0; S(12): 0.0; T(13): 0.0; T(14): 0.0	203	Reverse	Class I
O00159	1	Myosin-Ic OS=Homo sapiens GN=MYO1C PE=1 SV=2 - [MYO1C_HUMAN]	O00159	S312	Unconventional myosin-Ic (Myosin I beta) (MMI-beta) (MMIb)	MYO1C	RLLSVEGSTLREALT	1.23001	0.298673	1.10086	0.138632	7930000	6450000	14380000	7.15776	105146			pYLpTRLLSVEGpSTLR	3	Y(1): 100.0; T(3): 99.9; S(7): 0.7; S(11): 98.7; T(12): 0.6	67	Reverse	Class I
O00159	1	Myosin-Ic OS=Homo sapiens GN=MYO1C PE=1 SV=2 - [MYO1C_HUMAN]	O00159	S373	Unconventional myosin-Ic (Myosin I beta) (MMI-beta) (MMIb)	MYO1C	LASKDVESPSWRSTT	1.0627	0.0877334	0.951116	-0.072307	109000000	102000000	211000000	8.32428	23299			DVEpSPSWR	1	S(4): 100.0; S(6): 0.0	112	Reverse	Class I
O00159	1	Myosin-Ic OS=Homo sapiens GN=MYO1C PE=1 SV=2 - [MYO1C_HUMAN]	O00159	S375	Unconventional myosin-Ic (Myosin I beta) (MMI-beta) (MMIb)	MYO1C	SKDVESPSWRSTTVL	1.1274	0.172994	1.00902	0.0129536	121000000	108000000	229000000	8.35984	27264			DVESPpSWR	1	S(4): 6.5; S(6): 93.5	57	Reverse	Class I
O00159	1	Myosin-Ic OS=Homo sapiens GN=MYO1C PE=1 SV=2 - [MYO1C_HUMAN]	O00159	S557	Unconventional myosin-Ic (Myosin I beta) (MMI-beta) (MMIb)	MYO1C	CFDRSELSDKKRPET	1.3624	0.446148	1.21935	0.286108	4470000	3280000	7750000	6.8893	86374			SELpSDKKRPETVATQFK	1	S(1): 0.0; S(4): 99.9; T(11): 0.0; T(14): 0.0	137	Reverse	Class I
O00159	1	Myosin-Ic OS=Homo sapiens GN=MYO1C PE=1 SV=2 - [MYO1C_HUMAN]	O00159	S829	Unconventional myosin-Ic (Myosin I beta) (MMI-beta) (MMIb)	MYO1C	WKYCRSISPEWKQQL	1.10132	0.139236	0.985683	-0.0208046	92400000	83900000	176300000	8.24625	110199			SIpSPEWK	1	S(1): 0.0; S(3): 100.0	58	Reverse	Class I
O00159	1	Myosin-Ic OS=Homo sapiens GN=MYO1C PE=1 SV=2 - [MYO1C_HUMAN]	O00159	T304	Unconventional myosin-Ic (Myosin I beta) (MMI-beta) (MMIb)	MYO1C	ENQLKYLTRLLSVEG	1.23001	0.298673	1.10086	0.138632	7930000	6450000	14380000	7.15776	105146			pYLpTRLLSVEGpSTLR	3	Y(1): 100.0; T(3): 99.9; S(7): 0.7; S(11): 98.7; T(12): 0.6	67	Reverse	Class I
O00159	1	Myosin-Ic OS=Homo sapiens GN=MYO1C PE=1 SV=2 - [MYO1C_HUMAN]	O00159	Y302	Unconventional myosin-Ic (Myosin I beta) (MMI-beta) (MMIb)	MYO1C	TTENQLKYLTRLLSV	1.23001	0.298673	1.10086	0.138632	7930000	6450000	14380000	7.15776	105146			pYLpTRLLSVEGpSTLR	3	Y(1): 100.0; T(3): 99.9; S(7): 0.7; S(11): 98.7; T(12): 0.6	67	Reverse	Class I
O00161	1	Synaptosomal-associated protein 23 OS=Homo sapiens GN=SNAP23 PE=1 SV=1 - [SNP23_HUMAN]	O00161	S110	Synaptosomal-associated protein 23 (SNAP-23) (Vesicle-membrane fusion protein SNAP-23)	SNAP23	WGDGGENSPCNVVSK	1.16414	0.21927	1.04191	0.0592296	193000000	166000000	359000000	8.55509	23791			TTWGDGGENpSPCNVVSK	1	T(1): 0.0; T(2): 0.0; S(10): 100.0; S(16): 0.0	333	Reverse	Class I
O00161	1	Synaptosomal-associated protein 23 OS=Homo sapiens GN=SNAP23 PE=1 SV=1 - [SNP23_HUMAN]	O00161	S20	Synaptosomal-associated protein 23 (SNAP-23) (Vesicle-membrane fusion protein SNAP-23)	SNAP23	AHQITDESLESTRRI	1.23916	0.309359	1.10905	0.149319	249000000	201000000	450000000	8.65321	60076	Other/CK2	CK2a2	AHQITDEpSLESTR	1	T(5): 0.0; S(8): 100.0; S(11): 0.0; T(12): 0.0	130	Reverse	Class I
O00161	1	Synaptosomal-associated protein 23 OS=Homo sapiens GN=SNAP23 PE=1 SV=1 - [SNP23_HUMAN]	O00161	S34	Synaptosomal-associated protein 23 (SNAP-23) (Vesicle-membrane fusion protein SNAP-23)	SNAP23	ILGLAIESQDAGIKT	1.07527	0.104697	0.962366	-0.055343	37500000	34900000	72400000	7.85974	29868			ILGLAIEpSQDAGIK	1	S(8): 100.0	169	Reverse	Class I
O00178	1	GTP-binding protein 1 OS=Homo sapiens GN=GTPBP1 PE=1 SV=3 - [GTPB1_HUMAN]	O00178	S12	GTP-binding protein 1 (G-protein 1) (GP-1) (GP1)	GTPBP1	RSRSAMDSPVPASMF	0.883392	-0.178874	0.790636	-0.338914	18100000	20500000	38600000	7.58659	97274			SAMDpSPVPASMFAPEPSpSPGAAR	2	S(1): 0.0; S(5): 100.0; S(10): 0.0; S(17): 1.0; S(18): 99.0	208	Reverse	Class I
O00178	1	GTP-binding protein 1 OS=Homo sapiens GN=GTPBP1 PE=1 SV=3 - [GTPB1_HUMAN]	O00178	S25	GTP-binding protein 1 (G-protein 1) (GP-1) (GP1)	GTPBP1	MFAPEPSSPGAARAA	1.01729	0.0247367	0.910478	-0.135304	373000000	366000000	739000000	8.86864	24857			SAMDSPVPASMFAPEPSpSPGAAR	1	S(1): 0.0; S(5): 0.0; S(10): 0.0; S(17): 0.6; S(18): 99.4	368	Reverse	Class I
O00178	1	GTP-binding protein 1 OS=Homo sapiens GN=GTPBP1 PE=1 SV=3 - [GTPB1_HUMAN]	O00178	S44	GTP-binding protein 1 (G-protein 1) (GP-1) (GP1)	GTPBP1	RLHGGFDSDCSEDGE	1.16959	0.226004	1.04678	0.0659633	193000000	165000000	358000000	8.55388	24837			LHGGFDpSDCpSEDGEALNGEPELDLTSK	2	S(7): 100.0; S(10): 100.0; T(25): 0.0; S(26): 0.0	295	Reverse	Class I
O00178	1	GTP-binding protein 1 OS=Homo sapiens GN=GTPBP1 PE=1 SV=3 - [GTPB1_HUMAN]	O00178	S47	GTP-binding protein 1 (G-protein 1) (GP-1) (GP1)	GTPBP1	GGFDSDCSEDGEALN	1.16959	0.226004	1.04678	0.0659633	193000000	165000000	358000000	8.55388	24837			LHGGFDpSDCpSEDGEALNGEPELDLTSK	2	S(7): 100.0; S(10): 100.0; T(25): 0.0; S(26): 0.0	295	Reverse	Class I
O00178	1	GTP-binding protein 1 OS=Homo sapiens GN=GTPBP1 PE=1 SV=3 - [GTPB1_HUMAN]	O00178	S580	GTP-binding protein 1 (G-protein 1) (GP-1) (GP1)	GTPBP1	LLQTTNNSPMNSKPQ	1.17096	0.227692	1.04801	0.0676516	13600000	11700000	25300000	7.40312	134413			LLQTTNNpSPMNSKPQQIK	1	T(4): 0.0; T(5): 0.0; S(8): 99.9; S(12): 0.0	107	Reverse	Class I
O00192	1	Armadillo repeat protein deleted in velo-cardio-facial syndrome OS=Homo sapiens GN=ARVCF PE=1 SV=1 - [ARVC_HUMAN]	O00192	S198	Armadillo repeat protein deleted in velo-cardio-facial syndrome	ARVCF	EGPEPRDSPSYGSLS	0.566572	-0.819668	0.507082	-0.979709	42600000	75200000	117800000	8.07115	22798			DpSPSYGSLSR	1	S(2): 98.0; S(4): 1.9; Y(5): 0.0; S(7): 0.0; S(9): 0.0	36	Reverse	Class I
O00192	1	Armadillo repeat protein deleted in velo-cardio-facial syndrome OS=Homo sapiens GN=ARVCF PE=1 SV=1 - [ARVC_HUMAN]	O00192	S203	Armadillo repeat protein deleted in velo-cardio-facial syndrome	ARVCF	RDSPSYGSLSRGLGM	0.558971	-0.839153	0.500279	-0.999194	61700000	110000000	171700000	8.23477	26619			DSPSYGpSLSR	1	S(2): 0.0; S(4): 0.0; Y(5): 0.2; S(7): 99.8; S(9): 0.0	98	Reverse	Class I
O00192	1	Armadillo repeat protein deleted in velo-cardio-facial syndrome OS=Homo sapiens GN=ARVCF PE=1 SV=1 - [ARVC_HUMAN]	O00192	S343	Armadillo repeat protein deleted in velo-cardio-facial syndrome	ARVCF	LDRLVRRSPSVDSAR	1.06496	0.0908029	0.953142	-0.0692375	12100000	11300000	23400000	7.36922	83164			LVRRpSPSVDSAR	1	S(5): 100.0; S(7): 0.0; S(10): 0.0	274	Reverse	Class I
O00192	1	Armadillo repeat protein deleted in velo-cardio-facial syndrome OS=Homo sapiens GN=ARVCF PE=1 SV=1 - [ARVC_HUMAN]	O00192	S915	Armadillo repeat protein deleted in velo-cardio-facial syndrome	ARVCF	ERRPRGASSAGEASE	1.321	0.401635	1.1823	0.241594	10800000	8140000	18940000	7.27738	123635			GApSSAGEASEKEPLK	1	S(3): 99.7; S(4): 0.3; S(9): 0.0	175	Reverse	Class I
O00192	1	Armadillo repeat protein deleted in velo-cardio-facial syndrome OS=Homo sapiens GN=ARVCF PE=1 SV=1 - [ARVC_HUMAN]	O00192	T177	Armadillo repeat protein deleted in velo-cardio-facial syndrome	ARVCF	RGGGPVATLSRAYLS	0.152788	-2.71039	0.136746	-2.87043	297000	1940000	2237000	6.34967	114242			GGGPVApTLSR	1	T(7): 93.0; S(9): 7.0	62	Reverse	Class I
O00192	1	Armadillo repeat protein deleted in velo-cardio-facial syndrome OS=Homo sapiens GN=ARVCF PE=1 SV=1 - [ARVC_HUMAN]	O00192	T642	Armadillo repeat protein deleted in velo-cardio-facial syndrome	ARVCF	EMDRNFDTLDLPKRT	1.08108	0.112475	0.967568	-0.0475657	163000000	150000000	313000000	8.49554	125866			DGEMDRNFDpTLDLPK	1	T(10): 100.0	301	Reverse	Class I
O00192	1	Armadillo repeat protein deleted in velo-cardio-facial syndrome OS=Homo sapiens GN=ARVCF PE=1 SV=1 - [ARVC_HUMAN]	O00192	T838	Armadillo repeat protein deleted in velo-cardio-facial syndrome	ARVCF	SYKELRGTLQKDGWT	1.0142	0.0203404	0.907708	-0.1397	5780000	5700000	11480000	7.05994	57338			ELRGpTLQK	1	T(5): 100.0	225	Reverse	Class I
O00192	1	Armadillo repeat protein deleted in velo-cardio-facial syndrome OS=Homo sapiens GN=ARVCF PE=1 SV=1 - [ARVC_HUMAN]	O00192	T872	Armadillo repeat protein deleted in velo-cardio-facial syndrome	ARVCF	PGGFDDSTLPLVDKS	0.997009	-0.00432161	0.892323	-0.164362	92100000	92400000	184500000	8.266	30117			GALSPGGFDDSpTLPLVDK	1	S(4): 0.0; S(11): 2.7; T(12): 97.3	212	Reverse	Class I
O00193	1	Small acidic protein OS=Homo sapiens GN=SMAP PE=1 SV=1 - [SMAP_HUMAN]	O00193	S15	Small acidic protein	SMAP C11orf58	HPHGVKRSASPDDDL	1.0101	0.0144996	0.90404	-0.145541	15900000	15700000	31600000	7.49969	111051			pSApSPDDDLGSSNWEAADLGNEERK	2	S(1): 93.6; S(3): 93.6; S(10): 6.4; S(11): 6.4	101	Reverse	Class I
O00193	1	Small acidic protein OS=Homo sapiens GN=SMAP PE=1 SV=1 - [SMAP_HUMAN]	O00193	S17	Small acidic protein	SMAP C11orf58	HGVKRSASPDDDLGS	1.23001	0.298673	1.10086	0.138632	1300000000	1060000000	2360000000	9.37291	71703	AGC/AKT	AKT1	RSApSPDDDLGSSNWEAADLGNEERK	1	S(2): 0.5; S(4): 99.5; S(11): 0.0; S(12): 0.0	285	Reverse	Class I
O00193	1	Small acidic protein OS=Homo sapiens GN=SMAP PE=1 SV=1 - [SMAP_HUMAN]	O00193	S87	Small acidic protein	SMAP C11orf58	LESQYQQSMDSKLSG	1.90476	0.929611	1.70476	0.76957	10800000	5670000	16470000	7.21669	60425			KINEELESQYQQpSMDSK	1	S(8): 0.0; Y(10): 0.0; S(13): 100.0; S(16): 0.0	332	Reverse	Class I
O00203	1	AP-3 complex subunit beta-1 OS=Homo sapiens GN=AP3B1 PE=1 SV=2 - [AP3B1_HUMAN]	O00203	S276	AP-3 complex subunit beta-1 (Adapter-related protein complex 3 subunit beta-1) (Adaptor protein complex AP-3 subunit beta-1) (Beta-3A-adaptin) (Clathrin assembly protein complex 3 beta-1 large chain)	AP3B1 ADTB3A	NGKNFYESDDDQKEK	1.14286	0.192645	1.02286	0.0326047	873000000	764000000	1637000000	9.21405	114730	CK1	CK1a	NFYEpSDDDQK	1	Y(3): 0.1; S(5): 99.9	90	Reverse	Class I
O00203	1	AP-3 complex subunit beta-1 OS=Homo sapiens GN=AP3B1 PE=1 SV=2 - [AP3B1_HUMAN]	O00203	Y274	AP-3 complex subunit beta-1 (Adapter-related protein complex 3 subunit beta-1) (Adaptor protein complex AP-3 subunit beta-1) (Beta-3A-adaptin) (Clathrin assembly protein complex 3 beta-1 large chain)	AP3B1 ADTB3A	EDNGKNFYESDDDQK	1.37741	0.461959	1.23278	0.301918	456000000	331000000	787000000	8.89597	109178	TK/PDGFR	KIT	NFpYESDDDQK	1	Y(3): 100.0; S(5): 0.0	81	Reverse	Class I
O00255	1	Menin OS=Homo sapiens GN=MEN1 PE=1 SV=3 - [MEN1_HUMAN]	O00255	S548	Menin	MEN1 SCG2	QVPAPAASPPPEGPV	1.07759	0.107803	0.96444	-0.0522371	102000000	94300000	196300000	8.29292	29341	Atypical/PIKK/FRAP	FRAP	GPEGGSTAQVPAPAApSPPPEGPVLTFQSEK	1	S(6): 0.0; T(7): 0.0; S(16): 100.0; T(25): 0.0; S(28): 0.0	126	Reverse	Class I
O00264	1	Membrane-associated progesterone receptor component 1 OS=Homo sapiens GN=PGRMC1 PE=1 SV=3 - [PGRC1_HUMAN]	O00264	S181	Membrane-associated progesterone receptor component 1 (mPR)	PGRMC1 HPR6.6 PGRMC	GEEPTVYSDEEEPKD	1.07759	0.107803	0.96444	-0.0522371	1830000000	1690000000	3520000000	9.54654	47227	Other/CK2	CK2a2	EGEEPTVYpSDEEEPKDESAR	1	T(6): 0.0; Y(8): 0.0; S(9): 100.0; S(18): 0.0	269	Reverse	Class I
O00264	1	Membrane-associated progesterone receptor component 1 OS=Homo sapiens GN=PGRMC1 PE=1 SV=3 - [PGRC1_HUMAN]	O00264	S54	Membrane-associated progesterone receptor component 1 (mPR)	PGRMC1 HPR6.6 PGRMC	RGDQPAASGDSDDDE	1.42857	0.514573	1.27857	0.354533	102000000	71200000	173200000	8.23855	27344	Other/CK2	CK2a2	GDQPAApSGDSDDDEPPPLPR	1	S(7): 91.5; S(10): 8.5	77	Reverse	Class I
O00264	1	Membrane-associated progesterone receptor component 1 OS=Homo sapiens GN=PGRMC1 PE=1 SV=3 - [PGRC1_HUMAN]	O00264	S57	Membrane-associated progesterone receptor component 1 (mPR)	PGRMC1 HPR6.6 PGRMC	QPAASGDSDDDEPPP	1.31579	0.395929	1.17763	0.235888	121000000	92100000	213100000	8.32858	23709	Other/CK2	CK2a2	GDQPAASGDpSDDDEPPPLPR	1	S(7): 0.0; S(10): 100.0	221	Reverse	Class I
O00264	1	Membrane-associated progesterone receptor component 1 OS=Homo sapiens GN=PGRMC1 PE=1 SV=3 - [PGRC1_HUMAN]	O00264	Y180	Membrane-associated progesterone receptor component 1 (mPR)	PGRMC1 HPR6.6 PGRMC	EGEEPTVYSDEEEPK	1.10988	0.150401	0.993341	-0.00963942	359000000	323000000	682000000	8.83378	123996	TK/InsR	IRR	EGEEPTVpYSDEEEPKDESAR	1	T(6): 0.5; Y(8): 99.0; S(9): 0.5; S(18): 0.0	233	Reverse	Class I
O00267	1	Transcription elongation factor SPT5 OS=Homo sapiens GN=SUPT5H PE=1 SV=1 - [SPT5H_HUMAN]	O00267	S666	Transcription elongation factor SPT5 (hSPT5) (DRB sensitivity-inducing factor 160 kDa subunit) (DSIF p160) (DRB sensitivity-inducing factor large subunit) (DSIF large subunit) (Tat-cotransactivator 1 protein) (Tat-CT1 protein)	SUPT5H SPT5 SPT5H	VGGFAPMSPRISSPM	0.917431	-0.124328	0.821101	-0.284369	185000000	202000000	387000000	8.58771	20719	CMGC/CDK	CDK7, CDK9	DVTNFTVGGFAPMpSPR	1	T(3): 0.0; T(6): 0.0; S(14): 100.0	202	Reverse	Class I
O00267	1	Transcription elongation factor SPT5 OS=Homo sapiens GN=SUPT5H PE=1 SV=1 - [SPT5H_HUMAN]	O00267	S671	Transcription elongation factor SPT5 (hSPT5) (DRB sensitivity-inducing factor 160 kDa subunit) (DSIF p160) (DRB sensitivity-inducing factor large subunit) (DSIF large subunit) (Tat-cotransactivator 1 protein) (Tat-CT1 protein)	SUPT5H SPT5 SPT5H	PMSPRISSPMHPSAG	0.875657	-0.191563	0.783713	-0.351603	15000000	17200000	32200000	7.50786	133402	CMGC/CDK	CDK7, CDK9	ISpSPMHPSAGGQR	1	S(2): 6.0; S(3): 94.0; S(8): 0.0	136	Reverse	Class I
O00267	1	Transcription elongation factor SPT5 OS=Homo sapiens GN=SUPT5H PE=1 SV=1 - [SPT5H_HUMAN]	O00267	S789	Transcription elongation factor SPT5 (hSPT5) (DRB sensitivity-inducing factor 160 kDa subunit) (DSIF p160) (DRB sensitivity-inducing factor large subunit) (DSIF large subunit) (Tat-cotransactivator 1 protein) (Tat-CT1 protein)	SUPT5H SPT5 SPT5H	SRTPMYGSQTPLQDG	1.23609	0.305788	1.1063	0.145748	13100000	10600000	23700000	7.37475	23233			TPMYGpSQTPLQDGSR	1	T(1): 0.0; Y(4): 0.3; S(6): 99.5; T(8): 0.3; S(14): 0.0	175	Reverse	Class I
O00267	1	Transcription elongation factor SPT5 OS=Homo sapiens GN=SUPT5H PE=1 SV=1 - [SPT5H_HUMAN]	O00267	S804	Transcription elongation factor SPT5 (hSPT5) (DRB sensitivity-inducing factor 160 kDa subunit) (DSIF p160) (DRB sensitivity-inducing factor large subunit) (DSIF large subunit) (Tat-cotransactivator 1 protein) (Tat-CT1 protein)	SUPT5H SPT5 SPT5H	SRTPHYGSQTPLHDG	1.37931	0.463947	1.23448	0.303907	12000000	8730000	20730000	7.3166	168563			TPHYGpSQTPLHDGSR	1	T(1): 0.0; Y(4): 0.0; S(6): 99.3; T(8): 0.6; S(14): 0.0	154	Reverse	Class I
O00267	1	Transcription elongation factor SPT5 OS=Homo sapiens GN=SUPT5H PE=1 SV=1 - [SPT5H_HUMAN]	O00267	T1034	Transcription elongation factor SPT5 (hSPT5) (DRB sensitivity-inducing factor 160 kDa subunit) (DSIF p160) (DRB sensitivity-inducing factor large subunit) (DSIF large subunit) (Tat-cotransactivator 1 protein) (Tat-CT1 protein)	SUPT5H SPT5 SPT5H	SEHLEPITPTKNNKV	0.833333	-0.263034	0.745833	-0.423075	5610000	6730000	12340000	7.09132	135833	CMGC/CDK	CDK7, CDK9	VVSISSEHLEPIpTPTK	1	S(3): 0.0; S(5): 0.0; S(6): 0.0; T(13): 93.4; T(15): 6.5	74	Reverse	Class I
O00267	1	Transcription elongation factor SPT5 OS=Homo sapiens GN=SUPT5H PE=1 SV=1 - [SPT5H_HUMAN]	O00267	T1036	Transcription elongation factor SPT5 (hSPT5) (DRB sensitivity-inducing factor 160 kDa subunit) (DSIF p160) (DRB sensitivity-inducing factor large subunit) (DSIF large subunit) (Tat-cotransactivator 1 protein) (Tat-CT1 protein)	SUPT5H SPT5 SPT5H	HLEPITPTKNNKVKV	0.877963	-0.187768	0.785777	-0.347808	7070000	8050000	15120000	7.17955	55610			VVSISSEHLEPITPpTK	1	S(3): 0.0; S(5): 0.0; S(6): 0.0; T(13): 4.3; T(15): 95.7	174	Reverse	Class I
O00267	1	Transcription elongation factor SPT5 OS=Homo sapiens GN=SUPT5H PE=1 SV=1 - [SPT5H_HUMAN]	O00267	T806	Transcription elongation factor SPT5 (hSPT5) (DRB sensitivity-inducing factor 160 kDa subunit) (DSIF p160) (DRB sensitivity-inducing factor large subunit) (DSIF large subunit) (Tat-cotransactivator 1 protein) (Tat-CT1 protein)	SUPT5H SPT5 SPT5H	TPHYGSQTPLHDGSR	1.22699	0.295128	1.09816	0.135088	22000000	18000000	40000000	7.60206	168727	CMGC/CDK	CDK7, CDK9	TPHYGSQpTPLHDGSR	1	T(1): 0.0; Y(4): 0.0; S(6): 0.0; T(8): 100.0; S(14): 0.0	264	Reverse	Class I
O00273	1	DNA fragmentation factor subunit alpha OS=Homo sapiens GN=DFFA PE=1 SV=1 - [DFFA_HUMAN]	O00273	S315	DNA fragmentation factor subunit alpha (DNA fragmentation factor 45 kDa subunit) (DFF-45) (Inhibitor of CAD) (ICAD)	DFFA DFF1 DFF45 H13	SISASKASPPGDLQN	1.03413	0.0484122	0.925543	-0.111628	302000000	292000000	594000000	8.77379	51242	CMGC/CDK/CDC2	CDC2	SISASKApSPPGDLQNPK	1	S(1): 0.0; S(3): 0.0; S(5): 0.0; S(8): 100.0	323	Reverse	Class I
O00308	1	NEDD4-like E3 ubiquitin-protein ligase WWP2 OS=Homo sapiens GN=WWP2 PE=1 SV=2 - [WWP2_HUMAN]	O00308	S211	NEDD4-like E3 ubiquitin-protein ligase WWP2 (EC 6.3.2.-) (Atrophin-1-interacting protein 2) (AIP2) (WW domain-containing protein 2)	WWP2	TPATGEQSPGARSRH	0.999001	-0.00144197	0.894106	-0.161482	140000000	140000000	280000000	8.44716	112180			TTPATGEQpSPGAR	1	T(1): 0.0; T(2): 0.0; T(5): 0.0; S(9): 100.0	75	Reverse	Class I
O00308	1	NEDD4-like E3 ubiquitin-protein ligase WWP2 OS=Homo sapiens GN=WWP2 PE=1 SV=2 - [WWP2_HUMAN]	O00308	T207	NEDD4-like E3 ubiquitin-protein ligase WWP2 (EC 6.3.2.-) (Atrophin-1-interacting protein 2) (AIP2) (WW domain-containing protein 2)	WWP2	SARTTPATGEQSPGA	1.05708	0.0800879	0.946089	-0.0799525	78400000	74200000	152600000	8.18355	107980			TTPApTGEQSPGAR	1	T(1): 0.0; T(2): 0.0; T(5): 100.0; S(9): 0.0	150	Reverse	Class I
O00401	1	Neural Wiskott-Aldrich syndrome protein OS=Homo sapiens GN=WASL PE=1 SV=2 - [WASL_HUMAN]	O00401	S426	Neural Wiskott-Aldrich syndrome protein (N-WASP)	WASL	LKKVEQNSRPVSCSG	1.24224	0.312939	1.1118	0.152899	773000	622000	1395000	6.14457	62294			KVEQNpSRPVpSCSGR	2	S(6): 100.0; S(10): 99.4; S(12): 0.6	139	Reverse	Class I
O00401	1	Neural Wiskott-Aldrich syndrome protein OS=Homo sapiens GN=WASL PE=1 SV=2 - [WASL_HUMAN]	O00401	S430	Neural Wiskott-Aldrich syndrome protein (N-WASP)	WASL	EQNSRPVSCSGRDAL	1.97239	0.979942	1.76529	0.819902	51000000	25900000	76900000	7.88593	83083			KVEQNSRPVpSCSGR	1	S(6): 0.0; S(10): 100.0; S(12): 0.0	320	Reverse	Class I
O00401	1	Neural Wiskott-Aldrich syndrome protein OS=Homo sapiens GN=WASL PE=1 SV=2 - [WASL_HUMAN]	O00401	Y256	Neural Wiskott-Aldrich syndrome protein (N-WASP)	WASL	RETSKVIYDFIEKTG	1.0582	0.0816138	0.94709	-0.0784266	57500000	54300000	111800000	8.04844	119067			VIpYDFIEK	1	Y(3): 100.0	97	Reverse	Class I
O00418	1	Elongation factor 2 kinase OS=Homo sapiens GN=EEF2K PE=1 SV=1 - [EF2K_HUMAN]	O00418	S18	Eukaryotic elongation factor 2 kinase (eEF-2 kinase) (eEF-2K) (EC 2.7.11.20) (Calcium/calmodulin-dependent eukaryotic elongation factor 2 kinase)	EEF2K	EGVDGGQSPRAGHDG	1.21212	0.277534	1.08485	0.117494	31300000	25800000	57100000	7.75664	22384	CMGC/MAPK	Erk1, Erk2, JNK2, p38a, p38b, p38d, p38g	LEGVDGGQpSPR	1	S(9): 100.0	105	Reverse	Class I
O00418	1	Elongation factor 2 kinase OS=Homo sapiens GN=EEF2K PE=1 SV=1 - [EF2K_HUMAN]	O00418	S445	Eukaryotic elongation factor 2 kinase (eEF-2 kinase) (eEF-2K) (EC 2.7.11.20) (Calcium/calmodulin-dependent eukaryotic elongation factor 2 kinase)	EEF2K	SGDSGYPSEKRGELD	1.1976	0.260152	1.07186	0.100111	40800000	34100000	74900000	7.87448	139474	Other/CK2	CK2a2	ESENSGDSGYPpSEKRGELDDPEPR	1	S(2): 0.0; S(5): 0.0; S(8): 1.6; Y(10): 1.6; S(12): 96.9	128	Reverse	Class I
O00418	1	Elongation factor 2 kinase OS=Homo sapiens GN=EEF2K PE=1 SV=1 - [EF2K_HUMAN]	O00418	S470	Eukaryotic elongation factor 2 kinase (eEF-2 kinase) (eEF-2K) (EC 2.7.11.20) (Calcium/calmodulin-dependent eukaryotic elongation factor 2 kinase)	EEF2K	YSNRKYESDEDSLGS	1.10254	0.140826	0.98677	-0.0192149	19200000	17500000	36700000	7.56467	59678	Other/CK2	CK2a2	KYEpSDEDSLGSSGR	1	Y(2): 0.5; S(4): 99.5; S(8): 0.0; S(11): 0.0; S(12): 0.0	187	Reverse	Class I
O00418	1	Elongation factor 2 kinase OS=Homo sapiens GN=EEF2K PE=1 SV=1 - [EF2K_HUMAN]	O00418	S474	Eukaryotic elongation factor 2 kinase (eEF-2 kinase) (eEF-2K) (EC 2.7.11.20) (Calcium/calmodulin-dependent eukaryotic elongation factor 2 kinase)	EEF2K	KYESDEDSLGSSGRV	1.17371	0.231075	1.05047	0.0710343	8990000	7660000	16650000	7.22141	143903	Other/CK2	CK2a2	KYESDEDpSLGSSGR	1	Y(2): 0.0; S(4): 0.0; S(8): 100.0; S(11): 0.0; S(12): 0.0	132	Reverse	Class I
O00418	1	Elongation factor 2 kinase OS=Homo sapiens GN=EEF2K PE=1 SV=1 - [EF2K_HUMAN]	O00418	S72	Eukaryotic elongation factor 2 kinase (eEF-2 kinase) (eEF-2K) (EC 2.7.11.20) (Calcium/calmodulin-dependent eukaryotic elongation factor 2 kinase)	EEF2K	KSERYSSSGSPANSF	0.788644	-0.342555	0.705836	-0.502595	28100000	35600000	63700000	7.80414	157521	CMGC/GSK	GSK3A	YSSpSGpSPANSFHFK	2	Y(1): 0.0; S(2): 0.0; S(3): 4.8; S(4): 95.4; S(6): 99.5; S(10): 0.3	84	Reverse	Class I
O00418	1	Elongation factor 2 kinase OS=Homo sapiens GN=EEF2K PE=1 SV=1 - [EF2K_HUMAN]	O00418	S74	Eukaryotic elongation factor 2 kinase (eEF-2 kinase) (eEF-2K) (EC 2.7.11.20) (Calcium/calmodulin-dependent eukaryotic elongation factor 2 kinase)	EEF2K	ERYSSSGSPANSFHF	0.995025	-0.0071955	0.890547	-0.167236	13700000	13700000	27400000	7.43775	61204	CMGC/CDK/CDC2	CDC2	YSSSGpSPANSFHFK	1	Y(1): 0.0; S(2): 0.0; S(3): 0.0; S(4): 0.0; S(6): 100.0; S(10): 0.0	350	Reverse	Class I
O00418	1	Elongation factor 2 kinase OS=Homo sapiens GN=EEF2K PE=1 SV=1 - [EF2K_HUMAN]	O00418	T348	Eukaryotic elongation factor 2 kinase (eEF-2 kinase) (eEF-2K) (EC 2.7.11.20) (Calcium/calmodulin-dependent eukaryotic elongation factor 2 kinase)	EEF2K	KLLQSAKTILRGTEE	0.543478	-0.879706	0.486413	-1.03975	50000000	91900000	141900000	8.15198	51828			LLQSAKpTILR	1	S(4): 0.0; T(7): 100.0	132	Reverse	Class I
O00418	1	Elongation factor 2 kinase OS=Homo sapiens GN=EEF2K PE=1 SV=1 - [EF2K_HUMAN]	O00418	Y468	Eukaryotic elongation factor 2 kinase (eEF-2 kinase) (eEF-2K) (EC 2.7.11.20) (Calcium/calmodulin-dependent eukaryotic elongation factor 2 kinase)	EEF2K	HSYSNRKYESDEDSL	0.783699	-0.351628	0.701411	-0.511669	3940000	5030000	8970000	6.95279	159132	TK/VEGFR	FLT1	KpYESDEDSLGSSGR	1	Y(2): 99.3; S(4): 0.7; S(8): 0.0; S(11): 0.0; S(12): 0.0	152	Reverse	Class I
O00423	1	Echinoderm microtubule-associated protein-like 1 OS=Homo sapiens GN=EML1 PE=2 SV=2 - [EMAL1_HUMAN]	O00423	S113	Echinoderm microtubule-associated protein-like 1 (EMAP-1) (HuEMAP-1)	EML1 EMAP1 EMAPL EMAPL1	KPTGSLPSPSGVRKE	1.23153	0.300448	1.10222	0.140408	89300000	72500000	161800000	8.20898	165444			KPTGSLPpSPSGVRK	1	T(3): 0.0; S(5): 0.0; S(8): 99.4; S(10): 0.6	166	Reverse	Class I
O00425	1	Insulin-like growth factor 2 mRNA-binding protein 3 OS=Homo sapiens GN=IGF2BP3 PE=1 SV=1 - [IF2B3_HUMAN]	O00425	S184	Insulin-like growth factor 2 mRNA-binding protein 3 (IGF2 mRNA-binding protein 3) (IMP-3) (IGF-II mRNA-binding protein 3) (KH domain-containing protein overexpressed in cancer) (hKOC) (VICKZ family member 3)	IGF2BP3 IMP3 KOC1 VICKZ3	RGSSRQGSPGSVSKQ	1.07643	0.106249	0.963402	-0.0537909	287000	267000	554000	5.74351	21754			QGpSPGSVSK	1	S(3): 100.0; S(6): 0.0; S(8): 0.0	55	Reverse	Class I
O00425	1	Insulin-like growth factor 2 mRNA-binding protein 3 OS=Homo sapiens GN=IGF2BP3 PE=1 SV=1 - [IF2B3_HUMAN]	O00425	T528	Insulin-like growth factor 2 mRNA-binding protein 3 (IGF2 mRNA-binding protein 3) (IMP-3) (IGF-II mRNA-binding protein 3) (KH domain-containing protein overexpressed in cancer) (hKOC) (VICKZ family member 3)	IGF2BP3 IMP3 KOC1 VICKZ3	VVVPRDQTPDENDQV	1.06045	0.0846703	0.949099	-0.0753701	17800000	16800000	34600000	7.53908	16886			DQpTPDENDQVVVK	1	T(3): 100.0	175	Reverse	Class I
O00429	1	Dynamin-1-like protein OS=Homo sapiens GN=DNM1L PE=1 SV=2 - [DNM1L_HUMAN]	O00429	S616	Dynamin-1-like protein (EC 3.6.5.5) (Dnm1p/Vps1p-like protein) (DVLP) (Dynamin family member proline-rich carboxyl-terminal domain less) (Dymple) (Dynamin-like protein) (Dynamin-like protein 4) (Dynamin-like protein IV) (HdynIV) (Dynamin-related protein 1)	DNM1L DLP1 DRP1	PIPIMPASPQKGHAV	1.09649	0.132894	0.98136	-0.0271461	425000000	388000000	813000000	8.91009	60343			SKPIPIMPApSPQK	1	S(1): 0.0; S(10): 100.0	198	Reverse	Class I
O00443	1	Phosphatidylinositol-4-phosphate 3-kinase C2 domain-containing alpha polypeptide OS=Homo sapiens GN=PIK3C2A PE=1 SV=2 - [P3C2A_HUMAN]	O00443	S1281	Phosphatidylinositol 4-phosphate 3-kinase C2 domain-containing subunit alpha (PI3K-C2-alpha) (PtdIns-3-kinase C2 subunit alpha) (EC 2.7.1.154) (Phosphoinositide 3-kinase-C2-alpha)	PIK3C2A	GHAQMFGSFKRDRAP	0.971817	-0.041243	0.869776	-0.201283	612000	629000	1241000	6.09377	155455			FLGHAQMFGpSFKR	1	S(10): 100.0	119	Reverse	Class I
O00443	1	Phosphatidylinositol-4-phosphate 3-kinase C2 domain-containing alpha polypeptide OS=Homo sapiens GN=PIK3C2A PE=1 SV=2 - [P3C2A_HUMAN]	O00443	S259	Phosphatidylinositol 4-phosphate 3-kinase C2 domain-containing subunit alpha (PI3K-C2-alpha) (PtdIns-3-kinase C2 subunit alpha) (EC 2.7.1.154) (Phosphoinositide 3-kinase-C2-alpha)	PIK3C2A	KVSNLQVSPKSEDIS	1.23305	0.302226	1.10358	0.142186	63200000	51300000	114500000	8.05881	26440	Atypical/PIKK/FRAP	FRAP	VSNLQVpSPK	1	S(2): 0.0; S(7): 100.0	64	Reverse	Class I
O00443	1	Phosphatidylinositol-4-phosphate 3-kinase C2 domain-containing alpha polypeptide OS=Homo sapiens GN=PIK3C2A PE=1 SV=2 - [P3C2A_HUMAN]	O00443	S336	Phosphatidylinositol 4-phosphate 3-kinase C2 domain-containing subunit alpha (PI3K-C2-alpha) (PtdIns-3-kinase C2 subunit alpha) (EC 2.7.1.154) (Phosphoinositide 3-kinase-C2-alpha)	PIK3C2A	SVATVTRSQSLNIRT	0.710732	-0.492622	0.636105	-0.652663	52400000	73800000	126200000	8.10106	22791			pSQSLNIR	1	S(1): 99.4; S(3): 0.6	106	Reverse	Class I
O00443	1	Phosphatidylinositol-4-phosphate 3-kinase C2 domain-containing alpha polypeptide OS=Homo sapiens GN=PIK3C2A PE=1 SV=2 - [P3C2A_HUMAN]	O00443	S338	Phosphatidylinositol 4-phosphate 3-kinase C2 domain-containing subunit alpha (PI3K-C2-alpha) (PtdIns-3-kinase C2 subunit alpha) (EC 2.7.1.154) (Phosphoinositide 3-kinase-C2-alpha)	PIK3C2A	ATVTRSQSLNIRTTQ	0.714796	-0.484396	0.639743	-0.644436	139000000	195000000	334000000	8.52375	114690	AGC/PKC	PKCa, PKCb, PKCz	SQpSLNIR	1	S(1): 0.0; S(3): 100.0	70	Reverse	Class I
O00443	1	Phosphatidylinositol-4-phosphate 3-kinase C2 domain-containing alpha polypeptide OS=Homo sapiens GN=PIK3C2A PE=1 SV=2 - [P3C2A_HUMAN]	O00443	S58	Phosphatidylinositol 4-phosphate 3-kinase C2 domain-containing subunit alpha (PI3K-C2-alpha) (PtdIns-3-kinase C2 subunit alpha) (EC 2.7.1.154) (Phosphoinositide 3-kinase-C2-alpha)	PIK3C2A	NQRGFELSSSTRKKA	1.3459	0.428566	1.20458	0.268525	18300000	13600000	31900000	7.50379	23599			GFELpSSSTR	1	S(5): 97.3; S(6): 1.3; S(7): 1.3; T(8): 0.0	71	Reverse	Class I
O00443	1	Phosphatidylinositol-4-phosphate 3-kinase C2 domain-containing alpha polypeptide OS=Homo sapiens GN=PIK3C2A PE=1 SV=2 - [P3C2A_HUMAN]	O00443	S59	Phosphatidylinositol 4-phosphate 3-kinase C2 domain-containing subunit alpha (PI3K-C2-alpha) (PtdIns-3-kinase C2 subunit alpha) (EC 2.7.1.154) (Phosphoinositide 3-kinase-C2-alpha)	PIK3C2A	QRGFELSSSTRKKAQ	1.39665	0.481969	1.25	0.321928	27800000	20000000	47800000	7.67943	27605			GFELSpSSTR	1	S(5): 3.4; S(6): 93.0; S(7): 3.4; T(8): 0.2	97	Reverse	Class I
O00461	1	Golgi integral membrane protein 4 OS=Homo sapiens GN=GOLIM4 PE=1 SV=1 - [GOLI4_HUMAN]	O00461	Y641	Golgi integral membrane protein 4 (Golgi integral membrane protein, cis) (GIMPc) (Golgi phosphoprotein 4) (Golgi-localized phosphoprotein of 130 kDa) (Golgi phosphoprotein of 130 kDa)	GOLIM4 GIMPC GOLPH4 GPP130	EHNAEETYGENDENT	1.11732	0.16004	1	0	64400000	57700000	122100000	8.08672	89264			ELEHNAEETpYGENDENTDDKNNDGEEQEVRDDNRPK	1	T(9): 15.8; Y(10): 80.6; T(17): 3.6	35	Reverse	Class I
O00461	1	Golgi integral membrane protein 4 OS=Homo sapiens GN=GOLIM4 PE=1 SV=1 - [GOLI4_HUMAN]	O00461	Y673	Golgi integral membrane protein 4 (Golgi integral membrane protein, cis) (GIMPc) (Golgi phosphoprotein 4) (Golgi-localized phosphoprotein of 130 kDa) (Golgi phosphoprotein of 130 kDa)	GOLIM4 GIMPC GOLPH4 GPP130	PKGREEHYEEEEEEE	0.956938	-0.0635029	0.856459	-0.223543	23200000	24200000	47400000	7.67578	73185			GREEHpYEEEEEEEEDGAAVAEK	1	Y(6): 100.0	291	Reverse	Class I
O00479	1	High mobility group nucleosome-binding domain-containing protein 4 OS=Homo sapiens GN=HMGN4 PE=1 SV=3 - [HMGN4_HUMAN]	O00479	S80	High mobility group nucleosome-binding domain-containing protein 4 (Non-histone chromosomal protein HMG-17-like 3) (Non-histone chromosomal protein)	HMGN4 HMG17L3 NHC	RDASTLQSQKAEGTG	0.98912	-0.015783	0.885262	-0.175823	4290000	4340000	8630000	6.93601	72324			NRDASTLQpSQKAEGTGDAK	1	S(5): 0.0; T(6): 0.0; S(9): 100.0; T(15): 0.0	387	Reverse	Class I
O00499	1	Myc box-dependent-interacting protein 1 OS=Homo sapiens GN=BIN1 PE=1 SV=1 - [BIN1_HUMAN]	O00499	S296	Myc box-dependent-interacting protein 1 (Amphiphysin II) (Amphiphysin-like protein) (Box-dependent myc-interacting protein 1) (Bridging integrator 1)	BIN1 AMPHL	APAKGNKSPSPPDGS	0.976562	-0.0342157	0.874023	-0.194256	147000000	150000000	297000000	8.47276	51246	CMGC	CLK1	GNKpSPSPPDGSPAATPEIR	1	S(4): 92.3; S(6): 7.7; S(11): 0.0; T(15): 0.0	161	Reverse	Class I
O00499	1	Myc box-dependent-interacting protein 1 OS=Homo sapiens GN=BIN1 PE=1 SV=1 - [BIN1_HUMAN]	O00499	S298	Myc box-dependent-interacting protein 1 (Amphiphysin II) (Amphiphysin-like protein) (Box-dependent myc-interacting protein 1) (Bridging integrator 1)	BIN1 AMPHL	AKGNKSPSPPDGSPA	0.967118	-0.0482362	0.865571	-0.208277	311000000	322000000	633000000	8.8014	51268	CMGC	CLK1	GNKSPpSPPDGSPAATPEIR	1	S(4): 0.0; S(6): 100.0; S(11): 0.0; T(15): 0.0	278	Reverse	Class I
O00499	1	Myc box-dependent-interacting protein 1 OS=Homo sapiens GN=BIN1 PE=1 SV=1 - [BIN1_HUMAN]	O00499	S303	Myc box-dependent-interacting protein 1 (Amphiphysin II) (Amphiphysin-like protein) (Box-dependent myc-interacting protein 1) (Bridging integrator 1)	BIN1 AMPHL	SPSPPDGSPAATPEI	1.001	0.00144342	0.895896	-0.158597	103000000	103000000	206000000	8.31387	26883	CMGC	CLK1	SPSPPDGpSPAATPEIR	1	S(1): 0.0; S(3): 0.0; S(8): 100.0; T(12): 0.0	127	Reverse	Class I
O00499	1	Myc box-dependent-interacting protein 1 OS=Homo sapiens GN=BIN1 PE=1 SV=1 - [BIN1_HUMAN]	O00499	S331	Myc box-dependent-interacting protein 1 (Amphiphysin II) (Amphiphysin-like protein) (Box-dependent myc-interacting protein 1) (Bridging integrator 1)	BIN1 AMPHL	PGATLPKSPSQLRKG	1.13895	0.187707	1.01936	0.0276667	162000000	143000000	305000000	8.4843	84113	CMGC	CLK1	VNHEPEPAGGATPGATLPKpSPSQLRK	1	T(12): 0.0; T(16): 1.0; S(20): 97.9; S(22): 1.0	130	Reverse	Class I
O00499	1	Myc box-dependent-interacting protein 1 OS=Homo sapiens GN=BIN1 PE=1 SV=1 - [BIN1_HUMAN]	O00499	S333	Myc box-dependent-interacting protein 1 (Amphiphysin II) (Amphiphysin-like protein) (Box-dependent myc-interacting protein 1) (Bridging integrator 1)	BIN1 AMPHL	ATLPKSPSQLRKGPP	1.15473	0.207561	1.03349	0.0475207	106000000	91600000	197600000	8.29579	84254	Atypical/PIKK/DNAPK	DNAPK	VNHEPEPAGGATPGATLPKSPpSQLRK	1	T(12): 0.1; T(16): 0.9; S(20): 17.2; S(22): 81.8	57	Reverse	Class I
O00499	1	Myc box-dependent-interacting protein 1 OS=Homo sapiens GN=BIN1 PE=1 SV=1 - [BIN1_HUMAN]	O00499	T307	Myc box-dependent-interacting protein 1 (Amphiphysin II) (Amphiphysin-like protein) (Box-dependent myc-interacting protein 1) (Bridging integrator 1)	BIN1 AMPHL	PDGSPAATPEIRVNH	0.996016	-0.00575927	0.891434	-0.1658	12700000	12700000	25400000	7.40483	121981	CMGC	CLK1	GNKpSPSPPDGSPAApTPEIR	2	S(4): 92.0; S(6): 8.0; S(11): 8.0; T(15): 92.0	56	Reverse	Class I
O00501	1	Claudin-5 OS=Homo sapiens GN=CLDN5 PE=1 SV=1 - [CLD5_HUMAN]	O00501	T207	Claudin-5 (Transmembrane protein deleted in VCFS) (TMDVCF)	CLDN5 AWAL TMVCF	YSAPRRPTATGDYDK	2.13675	1.09542	1.91239	0.935379	86000000	40300000	126300000	8.1014	77611			RPpTATGDYDKK	1	T(3): 100.0; T(5): 0.0; Y(8): 0.0	282	Reverse	Class I
O00505	1	Importin subunit alpha-3 OS=Homo sapiens GN=KPNA3 PE=1 SV=2 - [IMA3_HUMAN]	O00505	S56	Importin subunit alpha-3 (Importin alpha Q2) (Qip2) (Karyopherin subunit alpha-3) (SRP1-gamma)	KPNA3 QIP2	RNVPQEESLEDSDVD	1.14155	0.190997	1.02169	0.0309568	760000000	666000000	1426000000	9.15412	28911	CAMK/PKD	PKD3	NVPQEEpSLEDSDVDADFK	1	S(7): 100.0; S(11): 0.0	74	Reverse	Class I
O00505	1	Importin subunit alpha-3 OS=Homo sapiens GN=KPNA3 PE=1 SV=2 - [IMA3_HUMAN]	O00505	S60	Importin subunit alpha-3 (Importin alpha Q2) (Qip2) (Karyopherin subunit alpha-3) (SRP1-gamma)	KPNA3 QIP2	QEESLEDSDVDADFK	1.1655	0.22095	1.04312	0.06091	770000000	660000000	1430000000	9.15534	118507			NVPQEESLEDpSDVDADFK	1	S(7): 0.0; S(11): 100.0	105	Reverse	Class I
O00506	1	Serine/threonine-protein kinase 25 OS=Homo sapiens GN=STK25 PE=1 SV=1 - [STK25_HUMAN]	O00506	S231	Serine/threonine-protein kinase 25 (EC 2.7.11.1) (Ste20-like kinase) (Sterile 20/oxidant stress-response kinase 1) (SOK-1) (Ste20/oxidant stress response kinase 1)	STK25 SOK1 YSK1	LFLIPKNSPPTLEGQ	0.963391	-0.0538064	0.862235	-0.213847	2240000	2320000	4560000	6.65896	82757			VLFLIPKNpSPPTLEGQHSKPFK	1	S(9): 91.6; T(12): 8.4; S(18): 0.0	46	Reverse	Class I
O00512	1	B-cell CLL/lymphoma 9 protein OS=Homo sapiens GN=BCL9 PE=1 SV=4 - [BCL9_HUMAN]	O00512	S687	B-cell CLL/lymphoma 9 protein (B-cell lymphoma 9 protein) (Bcl-9) (Protein legless homolog)	BCL9	IPVEGPLSPSRGDFP	1.04167	0.0588937	0.932292	-0.101147	32000000	30700000	62700000	7.79727	48956	Atypical/PIKK/FRAP	FRAP	IPVEGPLpSPSRGDFPK	1	S(8): 100.0; S(10): 0.0	298	Reverse	Class I
O00512	1	B-cell CLL/lymphoma 9 protein OS=Homo sapiens GN=BCL9 PE=1 SV=4 - [BCL9_HUMAN]	O00512	S689	B-cell CLL/lymphoma 9 protein (B-cell lymphoma 9 protein) (Bcl-9) (Protein legless homolog)	BCL9	VEGPLSPSRGDFPKG	1.03199	0.0454314	0.923633	-0.114609	2440000	2370000	4810000	6.68215	131968			IPVEGPLSPpSRGDFPK	1	S(8): 7.6; S(10): 92.4	147	Reverse	Class I
O00512	1	B-cell CLL/lymphoma 9 protein OS=Homo sapiens GN=BCL9 PE=1 SV=4 - [BCL9_HUMAN]	O00512	S917	B-cell CLL/lymphoma 9 protein (B-cell lymphoma 9 protein) (Bcl-9) (Protein legless homolog)	BCL9	VLGSAAASPVHLKSP	1.1236	0.168123	1.00562	0.00808235	2970000	2640000	5610000	6.74896	125218			SPPVLGSAAApSPVHLK	1	S(1): 0.0; S(7): 0.0; S(11): 100.0	187	Reverse	Class I
O00512	1	B-cell CLL/lymphoma 9 protein OS=Homo sapiens GN=BCL9 PE=1 SV=4 - [BCL9_HUMAN]	O00512	T155	B-cell CLL/lymphoma 9 protein (B-cell lymphoma 9 protein) (Bcl-9) (Protein legless homolog)	BCL9	ATAPRSSTPSHGQTT	1.07411	0.103147	0.961332	-0.0568935	60900000	56600000	117500000	8.07004	46535	Atypical/PIKK/FRAP	FRAP	SSpTPSHGQTTATEPTPAQK	1	S(1): 0.0; S(2): 0.0; T(3): 100.0; S(5): 0.0; T(9): 0.0; T(10): 0.0; T(12): 0.0; T(15): 0.0	329	Reverse	Class I
O00512	1	B-cell CLL/lymphoma 9 protein OS=Homo sapiens GN=BCL9 PE=1 SV=4 - [BCL9_HUMAN]	O00512	T315	B-cell CLL/lymphoma 9 protein (B-cell lymphoma 9 protein) (Bcl-9) (Protein legless homolog)	BCL9	TPNNRAVTPVSQGSN	1.24533	0.316528	1.11457	0.156488	29000000	23300000	52300000	7.7185	22117	Atypical/PIKK/FRAP	FRAP	AVpTPVSQGSNSSSADPK	1	T(3): 100.0; S(6): 0.0; S(9): 0.0; S(11): 0.0; S(12): 0.0; S(13): 0.0	288	Reverse	Class I
O00541	1	Pescadillo homolog 1 OS=Homo sapiens GN=PES1 PE=1 SV=1 - [PESC_HUMAN]	O00541	T515	Pescadillo homolog	PES1	KPRVMAGTLKLEDKQ	0.862069	-0.214125	0.771552	-0.374165	26700000	31000000	57700000	7.76118	89156			KPRVMAGpTLKLEDK	1	T(8): 100.0	120	Reverse	Class I
O00559	1	Receptor-binding cancer antigen expressed on SiSo cells OS=Homo sapiens GN=EBAG9 PE=1 SV=1 - [RCAS1_HUMAN]	O00559	S36	Receptor-binding cancer antigen expressed on SiSo cells (Cancer-associated surface antigen RCAS1) (Estrogen receptor-binding fragment-associated gene 9 protein)	EBAG9 RCAS1	SGRGRKLSGDQITLP	1.24533	0.316528	1.11457	0.156488	610000000	489000000	1099000000	9.041	45617			KLpSGDQITLPTTVDYSSVPK	1	S(3): 100.0; T(8): 0.0; T(11): 0.0; T(12): 0.0; Y(15): 0.0; S(16): 0.0; S(17): 0.0	243	Reverse	Class I
O00567	1	Nucleolar protein 5A OS=Homo sapiens GN=NOL5A PE=1 SV=4 - [NOL5A_HUMAN]	O00567	S519	Nucleolar protein 56 (Nucleolar protein 5A)	NOP56 NOL5A	FSKEELMSSDLEETA	1.26743	0.341903	1.13435	0.181862	122000000	96100000	218100000	8.33866	19234	Other/CK2	CK2a2	EELMpSSDLEETAGSTSIPK	1	S(5): 95.8; S(6): 4.2; T(11): 0.0; S(14): 0.0; T(15): 0.0; S(16): 0.0	80	Reverse	Class I
O00567	1	Nucleolar protein 5A OS=Homo sapiens GN=NOL5A PE=1 SV=4 - [NOL5A_HUMAN]	O00567	S520	Nucleolar protein 56 (Nucleolar protein 5A)	NOP56 NOL5A	SKEELMSSDLEETAG	1.10619	0.145605	0.990044	-0.0144351	157000000	142000000	299000000	8.47567	55729	Other/CK2	CK2a2	SFSKEELMSpSDLEETAGSTSIPK	1	S(1): 0.0; S(3): 0.0; S(9): 0.0; S(10): 100.0; T(15): 0.0; S(18): 0.0; T(19): 0.0; S(20): 0.0	357	Reverse	Class I
O00567	1	Nucleolar protein 5A OS=Homo sapiens GN=NOL5A PE=1 SV=4 - [NOL5A_HUMAN]	O00567	S569	Nucleolar protein 56 (Nucleolar protein 5A)	NOP56 NOL5A	FSKEEPVSSGPEEAV	1.42653	0.512514	1.27675	0.352473	18100000	12700000	30800000	7.48855	37443	Other/CK2	CK2a2	FSKEEPVpSpSGPEEAVGK	2	S(2): 0.0; S(8): 100.0; S(9): 100.0	275	Reverse	Class I
O00567	1	Nucleolar protein 5A OS=Homo sapiens GN=NOL5A PE=1 SV=4 - [NOL5A_HUMAN]	O00567	S570	Nucleolar protein 56 (Nucleolar protein 5A)	NOP56 NOL5A	SKEEPVSSGPEEAVG	0.985222	-0.0214797	0.881773	-0.18152	239000000	243000000	482000000	8.68305	51573	Other/CK2	CK2a2	FSKEEPVSpSGPEEAVGK	1	S(2): 0.0; S(8): 0.2; S(9): 99.8	148	Reverse	Class I
O00571	1	ATP-dependent RNA helicase DDX3X OS=Homo sapiens GN=DDX3X PE=1 SV=3 - [DDX3X_HUMAN]	O00571	S594	ATP-dependent RNA helicase DDX3X (EC 3.6.4.13) (DEAD box protein 3, X-chromosomal) (DEAD box, X isoform) (Helicase-like protein 2) (HLP2)	DDX3X DBX DDX3	RSKSSRFSGGFGARD	1.02669	0.0380063	0.918891	-0.122034	18000000	17600000	35600000	7.55145	142068			SSRFpSGGFGAR	1	S(1): 0.0; S(2): 0.8; S(5): 99.2	119	Reverse	Class I
O00571	1	ATP-dependent RNA helicase DDX3X OS=Homo sapiens GN=DDX3X PE=1 SV=3 - [DDX3X_HUMAN]	O00571	S82	ATP-dependent RNA helicase DDX3X (EC 3.6.4.13) (DEAD box protein 3, X-chromosomal) (DEAD box, X isoform) (Helicase-like protein 2) (HLP2)	DDX3X DBX DDX3	RSDSRGKSSFFSDRG	1.22699	0.295128	1.09816	0.135088	2960000	2410000	5370000	6.72997	145160			GKpSSFFSDR	1	S(3): 98.6; S(4): 1.4; S(7): 0.0	48	Reverse	Class I
O00571	1	ATP-dependent RNA helicase DDX3X OS=Homo sapiens GN=DDX3X PE=1 SV=3 - [DDX3X_HUMAN]	O00571	S90	ATP-dependent RNA helicase DDX3X (EC 3.6.4.13) (DEAD box protein 3, X-chromosomal) (DEAD box, X isoform) (Helicase-like protein 2) (HLP2)	DDX3X DBX DDX3	SFFSDRGSGSRGRFD	1.21803	0.284546	1.09013	0.124505	13200000	10800000	24000000	7.38021	142208			SSFFSDRGpSGSR	1	S(1): 0.0; S(2): 0.0; S(5): 0.0; S(9): 99.9; S(11): 0.0	115	Reverse	Class I
O00622	1	Protein CYR61 OS=Homo sapiens GN=CYR61 PE=1 SV=1 - [CYR61_HUMAN]	O00622	S188	Protein CYR61 (CCN family member 1) (Cysteine-rich angiogenic inducer 61) (Insulin-like growth factor-binding protein 10) (IBP-10) (IGF-binding protein 10) (IGFBP-10) (Protein GIG1)	CYR61 CCN1 GIG1 IGFBP10	KELGFDASEVELTRN	1.17647	0.234465	1.05294	0.0744248	2600000	2210000	4810000	6.68215	120165			ELGFDApSEVELTR	1	S(7): 100.0; T(12): 0.0	107	Reverse	Class I
O00629	1	Importin subunit alpha-4 OS=Homo sapiens GN=KPNA4 PE=1 SV=1 - [IMA4_HUMAN]	O00629	S60	Importin subunit alpha-4 (Importin alpha Q1) (Qip1) (Karyopherin subunit alpha-4)	KPNA4 QIP1	HEDICEDSDIDGDYR	1.2285	0.296899	1.09951	0.136859	27300000	22200000	49500000	7.69461	51889			NVPHEDICEDpSDIDGDYR	1	S(11): 100.0; Y(17): 0.0	266	Reverse	Class I
O00712	1	Nuclear factor 1 B-type OS=Homo sapiens GN=NFIB PE=2 SV=2 - [NFIB_HUMAN]	O00712	S264	Nuclear factor 1 B-type (NF1-B) (Nuclear factor 1/B) (CCAAT-box-binding transcription factor) (CTF) (Nuclear factor I/B) (NF-I/B) (NFI-B) (TGGCA-binding protein)	NFIB	VNLQRSLSSPPSSKR	1.21655	0.28279	1.08881	0.122749	36900000	30300000	67200000	7.82737	108307			SLpSSPPSSK	1	S(1): 0.0; S(3): 99.3; S(4): 0.7; S(7): 0.0; S(8): 0.0	105	Reverse	Class I
O00712	1	Nuclear factor 1 B-type OS=Homo sapiens GN=NFIB PE=2 SV=2 - [NFIB_HUMAN]	O00712	S265	Nuclear factor 1 B-type (NF1-B) (Nuclear factor 1/B) (CCAAT-box-binding transcription factor) (CTF) (Nuclear factor I/B) (NF-I/B) (NFI-B) (TGGCA-binding protein)	NFIB	NLQRSLSSPPSSKRP	0.69541	-0.524064	0.622392	-0.684104	50400000	72500000	122900000	8.08955	108379			SLSpSPPSSK	1	S(1): 1.2; S(3): 1.2; S(4): 97.6; S(7): 0.0; S(8): 0.0	92	Reverse	Class I
O00712	1	Nuclear factor 1 B-type OS=Homo sapiens GN=NFIB PE=2 SV=2 - [NFIB_HUMAN]	O00712	S295	Nuclear factor 1 B-type (NF1-B) (Nuclear factor 1/B) (CCAAT-box-binding transcription factor) (CTF) (Nuclear factor I/B) (NF-I/B) (NFI-B) (TGGCA-binding protein)	NFIB	DFYPSPSSPAAGSRT	0.968992	-0.045443	0.867248	-0.205483	135000000	139000000	274000000	8.43775	29284			TISIDENMEPSPTGDFYPSPSpSPAAGSR	1	T(1): 0.0; S(3): 0.0; S(11): 0.0; T(13): 0.0; Y(17): 0.4; S(19): 12.1; S(21): 12.1; S(22): 75.0; S(27): 0.4	55	Reverse	Class I
O00712	1	Nuclear factor 1 B-type OS=Homo sapiens GN=NFIB PE=2 SV=2 - [NFIB_HUMAN]	O00712	S312	Nuclear factor 1 B-type (NF1-B) (Nuclear factor 1/B) (CCAAT-box-binding transcription factor) (CTF) (Nuclear factor I/B) (NF-I/B) (NFI-B) (TGGCA-binding protein)	NFIB	ERDQDMSSPTTMKKP	1.38122	0.465938	1.23619	0.305898	13000000	9420000	22420000	7.35064	83455			TWHERDQDMSpSPTTMK	1	T(1): 0.0; S(10): 0.5; S(11): 99.0; T(13): 0.5; T(14): 0.0	153	Reverse	Class I
O00712	1	Nuclear factor 1 B-type OS=Homo sapiens GN=NFIB PE=2 SV=2 - [NFIB_HUMAN]	O00712	S326	Nuclear factor 1 B-type (NF1-B) (Nuclear factor 1/B) (CCAAT-box-binding transcription factor) (CTF) (Nuclear factor I/B) (NF-I/B) (NFI-B) (TGGCA-binding protein)	NFIB	PEKPLFSSASPQDSS	1.3986	0.483985	1.25175	0.323944	104000000	74400000	178400000	8.25139	81568			KPEKPLFSpSASPQDSSPR	1	S(8): 6.2; S(9): 87.5; S(11): 6.2; S(15): 0.0; S(16): 0.0	80	Reverse	Class I
O00712	1	Nuclear factor 1 B-type OS=Homo sapiens GN=NFIB PE=2 SV=2 - [NFIB_HUMAN]	O00712	S328	Nuclear factor 1 B-type (NF1-B) (Nuclear factor 1/B) (CCAAT-box-binding transcription factor) (CTF) (Nuclear factor I/B) (NF-I/B) (NFI-B) (TGGCA-binding protein)	NFIB	KPLFSSASPQDSSPR	1.27714	0.352916	1.14304	0.192875	273000000	213000000	486000000	8.68664	169686			KPEKPLFSSApSPQDSSPR	1	S(8): 0.1; S(9): 1.2; S(11): 98.7; S(15): 0.0; S(16): 0.0	141	Reverse	Class I
O00712	1	Nuclear factor 1 B-type OS=Homo sapiens GN=NFIB PE=2 SV=2 - [NFIB_HUMAN]	O00712	S332	Nuclear factor 1 B-type (NF1-B) (Nuclear factor 1/B) (CCAAT-box-binding transcription factor) (CTF) (Nuclear factor I/B) (NF-I/B) (NFI-B) (TGGCA-binding protein)	NFIB	SSASPQDSSPRLSTF	1.27714	0.352916	1.14304	0.192875	273000000	213000000	486000000	8.68664	169686			KPEKPLFSSASPQDpSSPR	1	S(8): 0.0; S(9): 0.0; S(11): 0.1; S(15): 99.9; S(16): 0.1	124	Reverse	Class I
O00712	1	Nuclear factor 1 B-type OS=Homo sapiens GN=NFIB PE=2 SV=2 - [NFIB_HUMAN]	O00712	S333	Nuclear factor 1 B-type (NF1-B) (Nuclear factor 1/B) (CCAAT-box-binding transcription factor) (CTF) (Nuclear factor I/B) (NF-I/B) (NFI-B) (TGGCA-binding protein)	NFIB	SASPQDSSPRLSTFP	1.27714	0.352916	1.14304	0.192875	273000000	213000000	486000000	8.68664	169686			KPEKPLFSSASPQDSpSPR	1	S(8): 0.0; S(9): 0.0; S(11): 0.1; S(15): 7.0; S(16): 92.9	71	Reverse	Class I
O00750	1	Phosphatidylinositol-4-phosphate 3-kinase C2 domain-containing beta polypeptide OS=Homo sapiens GN=PIK3C2B PE=1 SV=2 - [P3C2B_HUMAN]	O00750	S155	Phosphatidylinositol 4-phosphate 3-kinase C2 domain-containing subunit beta (PI3K-C2-beta) (PtdIns-3-kinase C2 subunit beta) (EC 2.7.1.154) (C2-PI3K) (Phosphoinositide 3-kinase-C2-beta)	PIK3C2B	EGSCKKLSPPPLPPR	1.0846	0.117161	0.970716	-0.0428791	3600000	3320000	6920000	6.84011	135403	Atypical/PIKK/FRAP	FRAP	KLpSPPPLPPR	1	S(3): 100.0	114	Reverse	Class I
O00767	1	Acyl-CoA desaturase OS=Homo sapiens GN=SCD PE=2 SV=2 - [ACOD_HUMAN]	O00767	S198	Acyl-CoA desaturase (EC 1.14.19.1) (Delta(9)-desaturase) (Delta-9 desaturase) (Fatty acid desaturase) (Stearoyl-CoA desaturase)	SCD	PAVKEKGSTLDLSDL	1.5625	0.643856	1.39844	0.483816	3520000	2250000	5770000	6.76118	125918	CAMK/CAMKL/CHK1	CHK1	EKGpSTLDLSDLEAEK	1	S(4): 88.6; T(5): 10.1; S(9): 1.3	61	Reverse	Class I
O14490	1	Disks large-associated protein 1 OS=Homo sapiens GN=DLGAP1 PE=2 SV=1 - [DLGP1_HUMAN]	O14490	S77	Disks large-associated protein 1 (DAP-1) (Guanylate kinase-associated protein) (hGKAP) (PSD-95/SAP90-binding protein 1) (SAP90/PSD-95-associated protein 1) (SAPAP1)	DLGAP1 DAP1 GKAP	FPRRHYTSQQELKDE	4.42478	2.14561	3.96018	1.98556	2500000	567000	3067000	6.48671	8574			RHYpTpSQQELK	2	Y(3): 13.1; T(4): 93.5; S(5): 93.5	58	Reverse	Class I
O14490	1	Disks large-associated protein 1 OS=Homo sapiens GN=DLGAP1 PE=2 SV=1 - [DLGP1_HUMAN]	O14490	T76	Disks large-associated protein 1 (DAP-1) (Guanylate kinase-associated protein) (hGKAP) (PSD-95/SAP90-binding protein 1) (SAP90/PSD-95-associated protein 1) (SAPAP1)	DLGAP1 DAP1 GKAP	TFPRRHYTSQQELKD	4.42478	2.14561	3.96018	1.98556	2500000	567000	3067000	6.48671	8574			RHYpTpSQQELK	2	Y(3): 13.1; T(4): 93.5; S(5): 93.5	58	Reverse	Class I
O14497	1	AT-rich interactive domain-containing protein 1A OS=Homo sapiens GN=ARID1A PE=1 SV=3 - [ARI1A_HUMAN]	O14497	S1184	AT-rich interactive domain-containing protein 1A (ARID domain-containing protein 1A) (B120) (BRG1-associated factor 250) (BAF250) (BRG1-associated factor 250a) (BAF250A) (Osa homolog 1) (hOSA1) (SWI-like protein) (SWI/SNF complex protein p270) (SWI/SNF-related, matrix-associated, actin-dependent regulator of chromatin subfamily F member 1) (hELD)	ARID1A BAF250 BAF250A C1orf4 OSA1 SMARCF1	PGMSRSNSVGIQDAF	1.25156	0.323733	1.12015	0.163692	40300000	32200000	72500000	7.86034	101538			SNpSVGIQDAFNDGSDSTFQK	1	S(1): 0.3; S(3): 99.7; S(14): 0.0; S(16): 0.0; T(17): 0.0	413	Reverse	Class I
O14497	1	AT-rich interactive domain-containing protein 1A OS=Homo sapiens GN=ARID1A PE=1 SV=3 - [ARI1A_HUMAN]	O14497	S1751	AT-rich interactive domain-containing protein 1A (ARID domain-containing protein 1A) (B120) (BRG1-associated factor 250) (BAF250) (BRG1-associated factor 250a) (BAF250A) (Osa homolog 1) (hOSA1) (SWI-like protein) (SWI/SNF complex protein p270) (SWI/SNF-related, matrix-associated, actin-dependent regulator of chromatin subfamily F member 1) (hELD)	ARID1A BAF250 BAF250A C1orf4 OSA1 SMARCF1	LLDPGRFSKVSSPAP	1.11607	0.158429	0.998884	-0.00161105	19700000	17700000	37400000	7.57287	52306			TLLDPGRFpSK	1	T(1): 0.0; S(9): 100.0	174	Reverse	Class I
O14497	1	AT-rich interactive domain-containing protein 1A OS=Homo sapiens GN=ARID1A PE=1 SV=3 - [ARI1A_HUMAN]	O14497	S1754	AT-rich interactive domain-containing protein 1A (ARID domain-containing protein 1A) (B120) (BRG1-associated factor 250) (BAF250) (BRG1-associated factor 250a) (BAF250A) (Osa homolog 1) (hOSA1) (SWI-like protein) (SWI/SNF complex protein p270) (SWI/SNF-related, matrix-associated, actin-dependent regulator of chromatin subfamily F member 1) (hELD)	ARID1A BAF250 BAF250A C1orf4 OSA1 SMARCF1	PGRFSKVSSPAPMEG	1.10619	0.145605	0.990044	-0.0144351	9550000	8630000	18180000	7.25959	101307			VpSSPAPMEGGEEEEELLGPK	1	S(2): 92.7; S(3): 7.3	183	Reverse	Class I
O14497	1	AT-rich interactive domain-containing protein 1A OS=Homo sapiens GN=ARID1A PE=1 SV=3 - [ARI1A_HUMAN]	O14497	S1755	AT-rich interactive domain-containing protein 1A (ARID domain-containing protein 1A) (B120) (BRG1-associated factor 250) (BAF250) (BRG1-associated factor 250a) (BAF250A) (Osa homolog 1) (hOSA1) (SWI-like protein) (SWI/SNF complex protein p270) (SWI/SNF-related, matrix-associated, actin-dependent regulator of chromatin subfamily F member 1) (hELD)	ARID1A BAF250 BAF250A C1orf4 OSA1 SMARCF1	GRFSKVSSPAPMEGG	0.825083	-0.27739	0.738449	-0.43743	4440000	5390000	9830000	6.99255	24946	CMGC/CDK	CDK4	VSpSPAPMEGGEEEEELLGPK	1	S(2): 0.4; S(3): 99.6	173	Reverse	Class I
O14497	1	AT-rich interactive domain-containing protein 1A OS=Homo sapiens GN=ARID1A PE=1 SV=3 - [ARI1A_HUMAN]	O14497	S1944	AT-rich interactive domain-containing protein 1A (ARID domain-containing protein 1A) (B120) (BRG1-associated factor 250) (BAF250) (BRG1-associated factor 250a) (BAF250A) (Osa homolog 1) (hOSA1) (SWI-like protein) (SWI/SNF complex protein p270) (SWI/SNF-related, matrix-associated, actin-dependent regulator of chromatin subfamily F member 1) (hELD)	ARID1A BAF250 BAF250A C1orf4 OSA1 SMARCF1	SKFPFGISPAQSHRN	0.628931	-0.669027	0.562893	-0.829067	2340000	3720000	6060000	6.78247	74379	CMGC/CDK	CDK4	ESSKFPFGIpSPAQSHR	1	S(2): 0.0; S(3): 0.0; S(10): 100.0; S(14): 0.0	256	Reverse	Class I
O14497	1	AT-rich interactive domain-containing protein 1A OS=Homo sapiens GN=ARID1A PE=1 SV=3 - [ARI1A_HUMAN]	O14497	S233	AT-rich interactive domain-containing protein 1A (ARID domain-containing protein 1A) (B120) (BRG1-associated factor 250) (BAF250) (BRG1-associated factor 250a) (BAF250A) (Osa homolog 1) (hOSA1) (SWI-like protein) (SWI/SNF complex protein p270) (SWI/SNF-related, matrix-associated, actin-dependent regulator of chromatin subfamily F member 1) (hELD)	ARID1A BAF250 BAF250A C1orf4 OSA1 SMARCF1	APAYALSSPRGGTPG	1.3369	0.41889	1.19652	0.258849	972000	728000	1700000	6.23045	117885	CMGC/CDK	CDK4	SAYPPPAPAYALSpSPR	1	S(1): 0.0; Y(3): 0.0; Y(10): 0.0; S(13): 4.4; S(14): 95.6	52	Reverse	Class I
O14497	1	AT-rich interactive domain-containing protein 1A OS=Homo sapiens GN=ARID1A PE=1 SV=3 - [ARI1A_HUMAN]	O14497	S363	AT-rich interactive domain-containing protein 1A (ARID domain-containing protein 1A) (B120) (BRG1-associated factor 250) (BAF250) (BRG1-associated factor 250a) (BAF250A) (Osa homolog 1) (hOSA1) (SWI-like protein) (SWI/SNF complex protein p270) (SWI/SNF-related, matrix-associated, actin-dependent regulator of chromatin subfamily F member 1) (hELD)	ARID1A BAF250 BAF250A C1orf4 OSA1 SMARCF1	RSHHAPMSPGSSGGG	1.51515	0.599462	1.35606	0.439422	85500000	56400000	141900000	8.15198	85576	CMGC/CDK	CDK4	SHHAPMpSPGSSGGGGQPLAR	1	S(1): 0.0; S(7): 100.0; S(10): 0.0; S(11): 0.0	259	Reverse	Class I
O14497	1	AT-rich interactive domain-containing protein 1A OS=Homo sapiens GN=ARID1A PE=1 SV=3 - [ARI1A_HUMAN]	O14497	S382	AT-rich interactive domain-containing protein 1A (ARID domain-containing protein 1A) (B120) (BRG1-associated factor 250) (BAF250) (BRG1-associated factor 250a) (BAF250A) (Osa homolog 1) (hOSA1) (SWI-like protein) (SWI/SNF complex protein p270) (SWI/SNF-related, matrix-associated, actin-dependent regulator of chromatin subfamily F member 1) (hELD)	ARID1A BAF250 BAF250A C1orf4 OSA1 SMARCF1	ARTPQPSSPMDQMGK	2.26244	1.17788	2.02489	1.01784	4140000	1830000	5970000	6.77597	112034			TPQPSpSPMDQMGK	1	T(1): 0.0; S(5): 0.2; S(6): 99.8	114	Reverse	Class I
O14497	1	AT-rich interactive domain-containing protein 1A OS=Homo sapiens GN=ARID1A PE=1 SV=3 - [ARI1A_HUMAN]	O14497	S604	AT-rich interactive domain-containing protein 1A (ARID domain-containing protein 1A) (B120) (BRG1-associated factor 250) (BAF250) (BRG1-associated factor 250a) (BAF250A) (Osa homolog 1) (hOSA1) (SWI-like protein) (SWI/SNF complex protein p270) (SWI/SNF-related, matrix-associated, actin-dependent regulator of chromatin subfamily F member 1) (hELD)	ARID1A BAF250 BAF250A C1orf4 OSA1 SMARCF1	FPPPQELSQDSFGSQ	1.27714	0.352916	1.14304	0.192875	4010000	3140000	7150000	6.85431	19571			FPPPQELpSQDSFGSQASSAPSMTSSK	1	S(8): 91.4; S(11): 7.7; S(14): 0.8; S(17): 0.0; S(18): 0.0; S(21): 0.0; T(23): 0.0; S(24): 0.0; S(25): 0.0	47	Reverse	Class I
O14497	1	AT-rich interactive domain-containing protein 1A OS=Homo sapiens GN=ARID1A PE=1 SV=3 - [ARI1A_HUMAN]	O14497	S696	AT-rich interactive domain-containing protein 1A (ARID domain-containing protein 1A) (B120) (BRG1-associated factor 250) (BAF250) (BRG1-associated factor 250a) (BAF250A) (Osa homolog 1) (hOSA1) (SWI-like protein) (SWI/SNF complex protein p270) (SWI/SNF-related, matrix-associated, actin-dependent regulator of chromatin subfamily F member 1) (hELD)	ARID1A BAF250 BAF250A C1orf4 OSA1 SMARCF1	LPGIRGPSPSPVGSP	1.20773	0.272297	1.08092	0.112257	95200000	78800000	174000000	8.24055	26777	CMGC/CDK	CDK4	GPpSPSPVGSPASVAQSR	1	S(3): 99.9; S(5): 0.1; S(9): 0.0; S(12): 0.0; S(16): 0.0	191	Reverse	Class I
O14497	1	AT-rich interactive domain-containing protein 1A OS=Homo sapiens GN=ARID1A PE=1 SV=3 - [ARI1A_HUMAN]	O14497	S698	AT-rich interactive domain-containing protein 1A (ARID domain-containing protein 1A) (B120) (BRG1-associated factor 250) (BAF250) (BRG1-associated factor 250a) (BAF250A) (Osa homolog 1) (hOSA1) (SWI-like protein) (SWI/SNF complex protein p270) (SWI/SNF-related, matrix-associated, actin-dependent regulator of chromatin subfamily F member 1) (hELD)	ARID1A BAF250 BAF250A C1orf4 OSA1 SMARCF1	GIRGPSPSPVGSPAS	0.977517	-0.0328061	0.874878	-0.192847	40600000	41600000	82200000	7.91487	96752	CMGC/CDK	CDK4	GPpSPpSPVGSPASVAQSR	2	S(3): 100.0; S(5): 99.6; S(9): 0.4; S(12): 0.0; S(16): 0.0	121	Reverse	Class I
O14497	1	AT-rich interactive domain-containing protein 1A OS=Homo sapiens GN=ARID1A PE=1 SV=3 - [ARI1A_HUMAN]	O14497	S702	AT-rich interactive domain-containing protein 1A (ARID domain-containing protein 1A) (B120) (BRG1-associated factor 250) (BAF250) (BRG1-associated factor 250a) (BAF250A) (Osa homolog 1) (hOSA1) (SWI-like protein) (SWI/SNF complex protein p270) (SWI/SNF-related, matrix-associated, actin-dependent regulator of chromatin subfamily F member 1) (hELD)	ARID1A BAF250 BAF250A C1orf4 OSA1 SMARCF1	PSPSPVGSPASVAQS	0.977517	-0.0328061	0.874878	-0.192847	40600000	41600000	82200000	7.91487	96752	CMGC/CDK	CDK4	GPpSPSPVGpSPASVAQSR	2	S(3): 100.0; S(5): 0.0; S(9): 100.0; S(12): 0.0; S(16): 0.0	187	Reverse	Class I
O14497	1	AT-rich interactive domain-containing protein 1A OS=Homo sapiens GN=ARID1A PE=1 SV=3 - [ARI1A_HUMAN]	O14497	S772	AT-rich interactive domain-containing protein 1A (ARID domain-containing protein 1A) (B120) (BRG1-associated factor 250) (BAF250) (BRG1-associated factor 250a) (BAF250A) (Osa homolog 1) (hOSA1) (SWI-like protein) (SWI/SNF complex protein p270) (SWI/SNF-related, matrix-associated, actin-dependent regulator of chromatin subfamily F member 1) (hELD)	ARID1A BAF250 BAF250A C1orf4 OSA1 SMARCF1	PQPGSALSPRQPSGG	1.07296	0.101598	0.9603	-0.0584423	171000000	159000000	330000000	8.51851	27198	CMGC/CDK	CDK4	NPQMPQYSSPQPGSALpSPR	1	Y(7): 0.0; S(8): 0.0; S(9): 0.0; S(14): 6.8; S(17): 93.2	70	Reverse	Class I
O14523	1	C2 domain-containing protein 2-like OS=Homo sapiens GN=C2CD2L PE=1 SV=3 - [C2C2L_HUMAN]	O14523	S662	C2 domain-containing protein 2-like (Transmembrane protein 24)	C2CD2L KIAA0285 TMEM24 DLNB23	KEAGLSQSHDDLSNA	1.21065	0.275786	1.08354	0.115746	8700000	7190000	15890000	7.20112	65877			EAGLSQpSHDDLSNATATPSVRK	1	S(5): 0.3; S(7): 99.7; S(12): 0.0; T(15): 0.0; T(17): 0.0; S(19): 0.0	191	Reverse	Class I
O14523	1	C2 domain-containing protein 2-like OS=Homo sapiens GN=C2CD2L PE=1 SV=3 - [C2C2L_HUMAN]	O14523	S703	C2 domain-containing protein 2-like (Transmembrane protein 24)	C2CD2L KIAA0285 TMEM24 DLNB23	PKANGNPSPQL****	1.0627	0.0877334	0.951116	-0.072307	13100000	12300000	25400000	7.40483	95604			ANGNPpSPQL	1	S(6): 100.0	50	Reverse	Class I
O14545	1	TRAF-type zinc finger domain-containing protein 1 OS=Homo sapiens GN=TRAFD1 PE=1 SV=1 - [TRAD1_HUMAN]	O14545	S278	TRAF-type zinc finger domain-containing protein 1 (Protein FLN29)	TRAFD1 FLN29	QSHGGPRSLSDIKGA	1.18483	0.244685	1.06043	0.0846447	7200000	6080000	13280000	7.1232	71038			AVCEADQSHGGPRpSLSDIK	1	S(8): 0.0; S(14): 100.0; S(16): 0.0	136	Reverse	Class I
O14545	1	TRAF-type zinc finger domain-containing protein 1 OS=Homo sapiens GN=TRAFD1 PE=1 SV=1 - [TRAD1_HUMAN]	O14545	S327	TRAF-type zinc finger domain-containing protein 1 (Protein FLN29)	TRAFD1 FLN29	SLNTGSSSPRGVEEP	1.37363	0.45799	1.2294	0.297949	452000000	329000000	781000000	8.89265	117240			ALPSLNTGSSpSPR	1	S(4): 0.0; T(7): 0.1; S(9): 3.4; S(10): 3.4; S(11): 93.0	100	Reverse	Class I
O14545	1	TRAF-type zinc finger domain-containing protein 1 OS=Homo sapiens GN=TRAFD1 PE=1 SV=1 - [TRAD1_HUMAN]	O14545	S415	TRAF-type zinc finger domain-containing protein 1 (Protein FLN29)	TRAFD1 FLN29	DSQPQETSPELPRRR	1.04932	0.0694519	0.93914	-0.0905885	857000000	816000000	1673000000	9.2235	115646			LDSQPQETpSPELPR	1	S(3): 0.0; T(8): 0.1; S(9): 99.9	135	Reverse	Class I
O14545	1	TRAF-type zinc finger domain-containing protein 1 OS=Homo sapiens GN=TRAFD1 PE=1 SV=1 - [TRAD1_HUMAN]	O14545	T414	TRAF-type zinc finger domain-containing protein 1 (Protein FLN29)	TRAFD1 FLN29	LDSQPQETSPELPRR	1.04384	0.0619024	0.934238	-0.098138	426000000	408000000	834000000	8.92117	23256			LDSQPQEpTSPELPR	1	S(3): 0.0; T(8): 99.3; S(9): 0.7	242	Reverse	Class I
O14558	1	Heat shock protein beta-6 OS=Homo sapiens GN=HSPB6 PE=1 SV=2 - [HSPB6_HUMAN]	O14558	S16	Heat shock protein beta-6 (HspB6) (Heat shock 20 kDa-like protein p20)	HSPB6	PSWLRRASAPLPGLS	1.98807	0.99137	1.77932	0.831329	12400000	6250000	18650000	7.27068	60941			RApSAPLPGLSAPGR	1	S(3): 100.0; S(10): 0.0	203	Reverse	Class I
O14578	1	Citron Rho-interacting kinase OS=Homo sapiens GN=CIT PE=1 SV=2 - [CTRO_HUMAN]	O14578	S1971	Citron Rho-interacting kinase (CRIK) (EC 2.7.11.1) (Serine/threonine-protein kinase 21)	CIT CRIK KIAA0949 STK21	TELRRDKSPGRPLER	1.20627	0.270556	1.07961	0.110516	13100000	10900000	24000000	7.38021	77915	CAMK/CAMK2	CaMK2d, CaMK2g	DKpSPGRPLER	1	S(3): 100.0	215	Reverse	Class I
O14578	1	Citron Rho-interacting kinase OS=Homo sapiens GN=CIT PE=1 SV=2 - [CTRO_HUMAN]	O14578	S1993	Citron Rho-interacting kinase (CRIK) (EC 2.7.11.1) (Serine/threonine-protein kinase 21)	CIT CRIK KIAA0949 STK21	LSTRRERSPGRLFED	1.2285	0.296899	1.09951	0.136859	4700000	3830000	8530000	6.93095	84259	AGC	PKN1	ERpSPGRLFEDSSR	1	S(3): 100.0; S(11): 0.0; S(12): 0.0	256	Reverse	Class I
O14578	1	Citron Rho-interacting kinase OS=Homo sapiens GN=CIT PE=1 SV=2 - [CTRO_HUMAN]	O14578	S440	Citron Rho-interacting kinase (CRIK) (EC 2.7.11.1) (Serine/threonine-protein kinase 21)	CIT CRIK KIAA0949 STK21	SVVSGLDSPAKTSSM	1.13636	0.184425	1.01705	0.0243842	8910000	7840000	16750000	7.22401	116237	CMGC/CDK	CDK5	SESVVSGLDpSPAK	1	S(1): 0.0; S(3): 0.0; S(6): 0.0; S(10): 100.0	157	Reverse	Class I
O14579	1	Coatomer subunit epsilon OS=Homo sapiens GN=COPE PE=2 SV=3 - [COPE_HUMAN]	O14579	S13	Coatomer subunit epsilon (Epsilon-coat protein) (Epsilon-COP)	COPE	PGPASGGSGEVDELF	1.08578	0.118727	0.97177	-0.0413135	14100000	13000000	27100000	7.43297	21055			APPAPGPASGGpSGEVDELFDVK	1	S(9): 0.9; S(12): 99.1	108	Reverse	Class I
O14579	1	Coatomer subunit epsilon OS=Homo sapiens GN=COPE PE=2 SV=3 - [COPE_HUMAN]	O14579	S99	Coatomer subunit epsilon (Epsilon-coat protein) (Epsilon-COP)	COPE	AHESRRDSIVAELDR	1.41443	0.500218	1.26591	0.340177	11600000	8200000	19800000	7.29667	79457	STE/STE20	NRK	RDpSIVAELDREMSR	1	S(3): 100.0; S(13): 0.0	274	Reverse	Class I
O14607	1	Histone demethylase UTY OS=Homo sapiens GN=UTY PE=1 SV=1 - [UTY_HUMAN]	O14607	S79	Histone demethylase UTY (EC 1.14.11.-) (Ubiquitously-transcribed TPR protein on the Y chromosome) (Ubiquitously-transcribed Y chromosome tetratricopeptide repeat protein)	UTY	KAVRCYESLILKAEG	26.3158	4.71786	23.5526	4.55782	1710000	64900	1774900	6.24917	103711			CpYEpSLILK	2	Y(2): 100.0; S(4): 100.0	79	Reverse	Class I
O14607	1	Histone demethylase UTY OS=Homo sapiens GN=UTY PE=1 SV=1 - [UTY_HUMAN]	O14607	Y77	Histone demethylase UTY (EC 1.14.11.-) (Ubiquitously-transcribed TPR protein on the Y chromosome) (Ubiquitously-transcribed Y chromosome tetratricopeptide repeat protein)	UTY	LGKAVRCYESLILKA	26.3158	4.71786	23.5526	4.55782	1710000	64900	1774900	6.24917	103711			CpYEpSLILK	2	Y(2): 100.0; S(4): 100.0	79	Reverse	Class I
O14613	1	Cdc42 effector protein 2 OS=Homo sapiens GN=CDC42EP2 PE=1 SV=1 - [BORG1_HUMAN]	O14613	S101	Cdc42 effector protein 2 (Binder of Rho GTPases 1)	CDC42EP2 BORG1 CEP2	RELPDGPSPLLKNAI	0.313381	-1.67401	0.280476	-1.83405	529000	1690000	2219000	6.34616	119132			ELPDGPpSPLLK	1	S(7): 100.0	77	Reverse	Class I
O14617	1	AP-3 complex subunit delta-1 OS=Homo sapiens GN=AP3D1 PE=1 SV=1 - [AP3D1_HUMAN]	O14617	S658	AP-3 complex subunit delta-1 (AP-3 complex subunit delta) (Adapter-related protein complex 3 subunit delta-1) (Delta-adaptin)	AP3D1 PRO0039	RRPKHRPSEADEEEL	1.3947	0.479955	1.24826	0.319915	4230000	3030000	7260000	6.86094	83352			HRPpSEADEEELAR	1	S(4): 100.0	135	Reverse	Class I
O14617	1	AP-3 complex subunit delta-1 OS=Homo sapiens GN=AP3D1 PE=1 SV=1 - [AP3D1_HUMAN]	O14617	S686	AP-3 complex subunit delta-1 (AP-3 complex subunit delta) (Adapter-related protein complex 3 subunit delta-1) (Delta-adaptin)	AP3D1 PRO0039	NPFYIKSSPSPQKRY	0.844595	-0.243669	0.755912	-0.403709	20900000	24700000	45600000	7.65896	68932			KQEQANNPFYIKSpSPSPQK	1	Y(10): 0.0; S(13): 1.4; S(14): 98.6; S(16): 0.0	166	Reverse	Class I
O14617	1	AP-3 complex subunit delta-1 OS=Homo sapiens GN=AP3D1 PE=1 SV=1 - [AP3D1_HUMAN]	O14617	S829	AP-3 complex subunit delta-1 (AP-3 complex subunit delta) (Adapter-related protein complex 3 subunit delta-1) (Delta-adaptin)	AP3D1 PRO0039	RNTETSKSPEKDVPM	1.19332	0.254978	1.06802	0.0949374	11000000	9230000	20230000	7.306	65774			NTETSKpSPEKDVPMVEK	1	T(2): 0.0; T(4): 0.0; S(5): 0.0; S(7): 100.0	276	Reverse	Class I
O14617	1	AP-3 complex subunit delta-1 OS=Homo sapiens GN=AP3D1 PE=1 SV=1 - [AP3D1_HUMAN]	O14617	S9	AP-3 complex subunit delta-1 (AP-3 complex subunit delta) (Adapter-related protein complex 3 subunit delta-1) (Delta-adaptin)	AP3D1 PRO0039	ALKMVKGSIDRMFDK	1.7094	0.773491	1.52991	0.613451	2010000	1180000	3190000	6.50379	75869			MVKGpSIDRMFDK	1	S(5): 100.0	252	Reverse	Class I
O14639	1	Actin-binding LIM protein 1 OS=Homo sapiens GN=ABLIM1 PE=1 SV=3 - [ABLM1_HUMAN]	O14639	S367	Actin-binding LIM protein 1 (abLIM-1) (Actin-binding LIM protein family member 1) (Actin-binding double zinc finger protein) (LIMAB1) (Limatin)	ABLIM1 ABLIM KIAA0059 LIMAB1	PGSSIPGSPGHTIYA	0.921659	-0.117695	0.824885	-0.277735	66000000	71600000	137600000	8.13862	66303			TSSESIYSRPGSSIPGpSPGHTIYAK	1	T(1): 0.0; S(2): 0.0; S(3): 0.0; S(5): 0.0; Y(7): 0.0; S(8): 0.0; S(12): 0.0; S(13): 0.0; S(17): 100.0; T(21): 0.0; Y(23): 0.0	237	Reverse	Class I
O14639	1	Actin-binding LIM protein 1 OS=Homo sapiens GN=ABLIM1 PE=1 SV=3 - [ABLM1_HUMAN]	O14639	S431	Actin-binding LIM protein 1 (abLIM-1) (Actin-binding LIM protein family member 1) (Actin-binding double zinc finger protein) (LIMAB1) (Limatin)	ABLIM1 ABLIM KIAA0059 LIMAB1	GESPRTLSPTPSAEG	1.06724	0.093879	0.955176	-0.0661614	371000000	348000000	719000000	8.85673	51662			TLpSPTPSAEGYQDVRDR	1	T(1): 0.0; S(3): 100.0; T(5): 0.0; S(7): 0.0; Y(11): 0.0	286	Reverse	Class I
O14639	1	Actin-binding LIM protein 1 OS=Homo sapiens GN=ABLIM1 PE=1 SV=3 - [ABLM1_HUMAN]	O14639	S435	Actin-binding LIM protein 1 (abLIM-1) (Actin-binding LIM protein family member 1) (Actin-binding double zinc finger protein) (LIMAB1) (Limatin)	ABLIM1 ABLIM KIAA0059 LIMAB1	RTLSPTPSAEGYQDV	1.33869	0.42082	1.19813	0.260779	34900000	26100000	61000000	7.78533	96942			TLpSPTPpSAEGYQDVR	2	T(1): 1.0; S(3): 98.0; T(5): 2.0; S(7): 99.0; Y(11): 0.0	163	Reverse	Class I
O14639	1	Actin-binding LIM protein 1 OS=Homo sapiens GN=ABLIM1 PE=1 SV=3 - [ABLM1_HUMAN]	O14639	S452	Actin-binding LIM protein 1 (abLIM-1) (Actin-binding LIM protein family member 1) (Actin-binding double zinc finger protein) (LIMAB1) (Limatin)	ABLIM1 ABLIM KIAA0059 LIMAB1	RMIHRSTSQGSINSP	1.20773	0.272297	1.08092	0.112257	261000000	216000000	477000000	8.67852	26784			STpSQGSINSPVYSR	1	S(1): 0.1; T(2): 2.7; S(3): 97.2; S(6): 0.0; S(9): 0.0; Y(12): 0.0; S(13): 0.0	152	Reverse	Class I
O14639	1	Actin-binding LIM protein 1 OS=Homo sapiens GN=ABLIM1 PE=1 SV=3 - [ABLM1_HUMAN]	O14639	S455	Actin-binding LIM protein 1 (abLIM-1) (Actin-binding LIM protein family member 1) (Actin-binding double zinc finger protein) (LIMAB1) (Limatin)	ABLIM1 ABLIM KIAA0059 LIMAB1	HRSTSQGSINSPVYS	1.07759	0.107803	0.96444	-0.0522371	29400000	27300000	56700000	7.75358	96750			STpSQGpSINSPVYSR	2	S(1): 1.7; T(2): 1.7; S(3): 98.3; S(6): 98.3; S(9): 0.0; Y(12): 0.0; S(13): 0.0	131	Reverse	Class I
O14639	1	Actin-binding LIM protein 1 OS=Homo sapiens GN=ABLIM1 PE=1 SV=3 - [ABLM1_HUMAN]	O14639	S458	Actin-binding LIM protein 1 (abLIM-1) (Actin-binding LIM protein family member 1) (Actin-binding double zinc finger protein) (LIMAB1) (Limatin)	ABLIM1 ABLIM KIAA0059 LIMAB1	TSQGSINSPVYSRHS	0.516262	-0.953824	0.462055	-1.11386	41700000	80800000	122500000	8.08814	114108			STSQGSINpSPVYSR	1	S(1): 0.0; T(2): 0.0; S(3): 0.0; S(6): 0.0; S(9): 100.0; Y(12): 0.0; S(13): 0.0	160	Reverse	Class I
O14639	1	Actin-binding LIM protein 1 OS=Homo sapiens GN=ABLIM1 PE=1 SV=3 - [ABLM1_HUMAN]	O14639	S538	Actin-binding LIM protein 1 (abLIM-1) (Actin-binding LIM protein family member 1) (Actin-binding double zinc finger protein) (LIMAB1) (Limatin)	ABLIM1 ABLIM KIAA0059 LIMAB1	HAALAAQSKSSEDII	1.43472	0.520769	1.28407	0.360729	11700000	8180000	19880000	7.29842	165905			QHAALAAQpSKSSEDIIK	1	S(9): 99.6; S(11): 0.4; S(12): 0.0	255	Reverse	Class I
O14639	1	Actin-binding LIM protein 1 OS=Homo sapiens GN=ABLIM1 PE=1 SV=3 - [ABLM1_HUMAN]	O14639	S540	Actin-binding LIM protein 1 (abLIM-1) (Actin-binding LIM protein family member 1) (Actin-binding double zinc finger protein) (LIMAB1) (Limatin)	ABLIM1 ABLIM KIAA0059 LIMAB1	ALAAQSKSSEDIIKF	1.2837	0.360305	1.14891	0.200264	44100000	34300000	78400000	7.89432	73251			QHAALAAQSKpSSEDIIK	1	S(9): 0.0; S(11): 100.0; S(12): 0.0	402	Reverse	Class I
O14639	1	Actin-binding LIM protein 1 OS=Homo sapiens GN=ABLIM1 PE=1 SV=3 - [ABLM1_HUMAN]	O14639	S587	Actin-binding LIM protein 1 (abLIM-1) (Actin-binding LIM protein family member 1) (Actin-binding double zinc finger protein) (LIMAB1) (Limatin)	ABLIM1 ABLIM KIAA0059 LIMAB1	PDMKRRSSGREEDDE	1.74825	0.805913	1.56469	0.645873	2760000	1580000	4340000	6.63749	130927			SpSGREEDDEELLR	1	S(1): 2.5; S(2): 97.5	290	Reverse	Class I
O14639	1	Actin-binding LIM protein 1 OS=Homo sapiens GN=ABLIM1 PE=1 SV=3 - [ABLM1_HUMAN]	O14639	S655	Actin-binding LIM protein 1 (abLIM-1) (Actin-binding LIM protein family member 1) (Actin-binding double zinc finger protein) (LIMAB1) (Limatin)	ABLIM1 ABLIM KIAA0059 LIMAB1	IPSSKTASLPGYGRN	0.980392	-0.0285692	0.877451	-0.18861	677000000	691000000	1368000000	9.13609	26963			TApSLPGYGR	1	T(1): 0.2; S(3): 99.8; Y(7): 0.0	102	Reverse	Class I
O14639	1	Actin-binding LIM protein 1 OS=Homo sapiens GN=ABLIM1 PE=1 SV=3 - [ABLM1_HUMAN]	O14639	S677	Actin-binding LIM protein 1 (abLIM-1) (Actin-binding LIM protein family member 1) (Actin-binding double zinc finger protein) (LIMAB1) (Limatin)	ABLIM1 ABLIM KIAA0059 LIMAB1	TDFAQYNSYGDVSGG	1.34953	0.432455	1.20783	0.272414	11200000	8320000	19520000	7.29048	170267			NGLHRPVSTDFAQYNpSYGDVSGGVR	1	S(8): 0.0; T(9): 0.0; Y(14): 0.0; S(16): 99.3; Y(17): 0.7; S(21): 0.0	284	Reverse	Class I
O14639	1	Actin-binding LIM protein 1 OS=Homo sapiens GN=ABLIM1 PE=1 SV=3 - [ABLM1_HUMAN]	O14639	S706	Actin-binding LIM protein 1 (abLIM-1) (Actin-binding LIM protein family member 1) (Actin-binding double zinc finger protein) (LIMAB1) (Limatin)	ABLIM1 ABLIM KIAA0059 LIMAB1	MRMDRGVSMPNMLEP	1.05597	0.0785637	0.94509	-0.0814767	719000000	680000000	1399000000	9.14582	114497			GVpSMPNMLEPK	1	S(3): 100.0	71	Reverse	Class I
O14639	1	Actin-binding LIM protein 1 OS=Homo sapiens GN=ABLIM1 PE=1 SV=3 - [ABLM1_HUMAN]	O14639	T433	Actin-binding LIM protein 1 (abLIM-1) (Actin-binding LIM protein family member 1) (Actin-binding double zinc finger protein) (LIMAB1) (Limatin)	ABLIM1 ABLIM KIAA0059 LIMAB1	SPRTLSPTPSAEGYQ	1.15741	0.210897	1.03588	0.0508564	72600000	62700000	135300000	8.1313	51437			TLSPpTPSAEGYQDVRDR	1	T(1): 0.0; S(3): 1.4; T(5): 97.1; S(7): 1.4; Y(11): 0.0	142	Reverse	Class I
O14639	1	Actin-binding LIM protein 1 OS=Homo sapiens GN=ABLIM1 PE=1 SV=3 - [ABLM1_HUMAN]	O14639	T653	Actin-binding LIM protein 1 (abLIM-1) (Actin-binding LIM protein family member 1) (Actin-binding double zinc finger protein) (LIMAB1) (Limatin)	ABLIM1 ABLIM KIAA0059 LIMAB1	SHIPSSKTASLPGYG	0.961538	-0.0565835	0.860577	-0.216624	373000000	388000000	761000000	8.88138	109453			pTASLPGYGR	1	T(1): 99.4; S(3): 0.6; Y(7): 0.0	126	Reverse	Class I
O14640	1	Segment polarity protein dishevelled homolog DVL-1 OS=Homo sapiens GN=DVL1 PE=1 SV=2 - [DVL1_HUMAN]	O14640	S625	Segment polarity protein dishevelled homolog DVL-1 (Dishevelled-1) (DSH homolog 1)	DVL1	ERPAGQLSRGSSPRS	2.34192	1.22769	2.09602	1.06765	5370000	2290000	7660000	6.88423	138818			ERPAGQLpSR	1	S(8): 100.0	30	Reverse	Class I
O14646	1	Chromodomain-helicase-DNA-binding protein 1 OS=Homo sapiens GN=CHD1 PE=1 SV=1 - [CHD1_HUMAN]	O14646	S1677	Chromodomain-helicase-DNA-binding protein 1 (CHD-1) (EC 3.6.4.12) (ATP-dependent helicase CHD1)	CHD1	ASSSGPRSPLDQRSY	1.13507	0.182786	1.01589	0.0227457	55800000	49100000	104900000	8.02078	59590			ASSSGPRpSPLDQR	1	S(2): 0.0; S(3): 0.0; S(4): 0.0; S(8): 100.0	279	Reverse	Class I
O14646	1	Chromodomain-helicase-DNA-binding protein 1 OS=Homo sapiens GN=CHD1 PE=1 SV=1 - [CHD1_HUMAN]	O14646	S1688	Chromodomain-helicase-DNA-binding protein 1 (CHD-1) (EC 3.6.4.12) (ATP-dependent helicase CHD1)	CHD1	QRSYGSRSPFEHSVE	1.82815	0.870387	1.6362	0.710347	16800000	9160000	25960000	7.4143	90466			SYGSRpSPFEHSVEHK	1	S(1): 0.0; Y(2): 0.0; S(4): 0.0; S(6): 100.0; S(11): 0.0	265	Reverse	Class I
O14646	1	Chromodomain-helicase-DNA-binding protein 1 OS=Homo sapiens GN=CHD1 PE=1 SV=1 - [CHD1_HUMAN]	O14646	S89	Chromodomain-helicase-DNA-binding protein 1 (CHD-1) (EC 3.6.4.12) (ATP-dependent helicase CHD1)	CHD1	DGAEFWKSSPSILAV	1.02987	0.0424568	0.92173	-0.117584	12900000	12600000	25500000	7.40654	23693			pSSPSILAVQR	1	S(1): 99.5; S(2): 0.5; S(4): 0.0	91	Reverse	Class I
O14646	1	Chromodomain-helicase-DNA-binding protein 1 OS=Homo sapiens GN=CHD1 PE=1 SV=1 - [CHD1_HUMAN]	O14646	S90	Chromodomain-helicase-DNA-binding protein 1 (CHD-1) (EC 3.6.4.12) (ATP-dependent helicase CHD1)	CHD1	GAEFWKSSPSILAVQ	1.00705	0.0101344	0.901309	-0.149906	27100000	26900000	54000000	7.73239	27832	CMGC/CDK	CDK9	SpSPSILAVQR	1	S(1): 2.5; S(2): 97.5; S(4): 0.0	130	Reverse	Class I
O14647	1	Chromodomain-helicase-DNA-binding protein 2 OS=Homo sapiens GN=CHD2 PE=2 SV=2 - [CHD2_HUMAN]	O14647	S1365	Chromodomain-helicase-DNA-binding protein 2 (CHD-2) (EC 3.6.4.12) (ATP-dependent helicase CHD2)	CHD2	EHGIELSSPRHSDNP	1.11732	0.16004	1	0	7110000	6360000	13470000	7.12937	83988			LKEEHGIELSpSPR	1	S(10): 0.0; S(11): 100.0	306	Reverse	Class I
O14647	1	Chromodomain-helicase-DNA-binding protein 2 OS=Homo sapiens GN=CHD2 PE=2 SV=2 - [CHD2_HUMAN]	O14647	S1807	Chromodomain-helicase-DNA-binding protein 2 (CHD-2) (EC 3.6.4.12) (ATP-dependent helicase CHD2)	CHD2	KSPLDHRSPLERSLE	0.988142	-0.0172093	0.884387	-0.17725	15800000	16000000	31800000	7.50243	78394			SPLDHRpSPLER	1	S(1): 0.0; S(7): 100.0	168	Reverse	Class I
O14662	1	Syntaxin-16 OS=Homo sapiens GN=STX16 PE=2 SV=3 - [STX16_HUMAN]	O14662	S35	Syntaxin-16 (Syn16)	STX16	VSSHITSSPLHSRSI	1.25945	0.332789	1.1272	0.172749	32200000	25500000	57700000	7.76118	163498			QLLAEQVSSHITSpSPLHSR	1	S(8): 0.0; S(9): 0.2; T(12): 10.1; S(13): 10.1; S(14): 78.1; S(18): 1.4	80	Reverse	Class I
O14662	1	Syntaxin-16 OS=Homo sapiens GN=STX16 PE=2 SV=3 - [STX16_HUMAN]	O14662	S41	Syntaxin-16 (Syn16)	STX16	SSPLHSRSIAAELDE	2.3753	1.24811	2.12589	1.08807	961000	404000	1365000	6.13513	107261			pSIAAELDELADDR	1	S(1): 100.0	66	Reverse	Class I
O14672	1	ADAM 10 OS=Homo sapiens GN=ADAM10 PE=1 SV=1 - [ADA10_HUMAN]	O14672	T719	Disintegrin and metalloproteinase domain-containing protein 10 (ADAM 10) (EC 3.4.24.81) (CDw156) (Kuzbanian protein homolog) (Mammalian disintegrin-metalloprotease) (CD antigen CD156c)	ADAM10 KUZ MADM	PPKPLPGTLKRRRPP	0.876424	-0.190299	0.7844	-0.350339	15800000	18100000	33900000	7.5302	52119			LPPPKPLPGpTLK	1	T(10): 100.0	133	Reverse	Class I
O14686	1	Histone-lysine N-methyltransferase MLL2 OS=Homo sapiens GN=MLL2 PE=1 SV=1 - [MLL2_HUMAN]	O14686	S1331	Histone-lysine N-methyltransferase MLL2 (EC 2.1.1.43) (ALL1-related protein) (Lysine N-methyltransferase 2B) (KMT2B) (Myeloid/lymphoid or mixed-lineage leukemia protein 2)	MLL2 ALR KMT2B	LLRNLTMSPLHKRRQ	1.11235	0.153607	0.995551	-0.00643343	12000000	10800000	22800000	7.35793	134207			NLTMpSPLHK	1	T(3): 0.0; S(5): 100.0	130	Reverse	Class I
O14686	1	Histone-lysine N-methyltransferase MLL2 OS=Homo sapiens GN=MLL2 PE=1 SV=1 - [MLL2_HUMAN]	O14686	S1396	Histone-lysine N-methyltransferase MLL2 (EC 2.1.1.43) (ALL1-related protein) (Lysine N-methyltransferase 2B) (KMT2B) (Myeloid/lymphoid or mixed-lineage leukemia protein 2)	MLL2 ALR KMT2B	IKLEGPVSPDVEPGK	1.13507	0.182786	1.01589	0.0227457	15500000	13600000	29100000	7.46389	124573			LEGPVpSPDVEPGKEETEESK	1	S(6): 100.0; T(16): 0.0; S(19): 0.0	187	Reverse	Class I
O14686	1	Histone-lysine N-methyltransferase MLL2 OS=Homo sapiens GN=MLL2 PE=1 SV=1 - [MLL2_HUMAN]	O14686	S1999	Histone-lysine N-methyltransferase MLL2 (EC 2.1.1.43) (ALL1-related protein) (Lysine N-methyltransferase 2B) (KMT2B) (Myeloid/lymphoid or mixed-lineage leukemia protein 2)	MLL2 ALR KMT2B	KASEPLLSPPPFGES	1.02987	0.0424568	0.92173	-0.117584	41900000	40700000	82600000	7.91698	56056			ASEPLLpSPPPFGESRK	1	S(2): 0.0; S(7): 100.0; S(14): 0.0	193	Reverse	Class I
O14686	1	Histone-lysine N-methyltransferase MLL2 OS=Homo sapiens GN=MLL2 PE=1 SV=1 - [MLL2_HUMAN]	O14686	S2361	Histone-lysine N-methyltransferase MLL2 (EC 2.1.1.43) (ALL1-related protein) (Lysine N-methyltransferase 2B) (KMT2B) (Myeloid/lymphoid or mixed-lineage leukemia protein 2)	MLL2 ALR KMT2B	SHGASQRSGITSPVE	1.18483	0.244685	1.06043	0.0846447	15100000	12700000	27800000	7.44404	108854			pSGITSPVEK	1	S(1): 99.1; T(4): 0.5; S(5): 0.5	39	Reverse	Class I
O14686	1	Histone-lysine N-methyltransferase MLL2 OS=Homo sapiens GN=MLL2 PE=1 SV=1 - [MLL2_HUMAN]	O14686	S2365	Histone-lysine N-methyltransferase MLL2 (EC 2.1.1.43) (ALL1-related protein) (Lysine N-methyltransferase 2B) (KMT2B) (Myeloid/lymphoid or mixed-lineage leukemia protein 2)	MLL2 ALR KMT2B	SQRSGITSPVEKRED	1.11732	0.16004	1	0	23300000	20800000	44100000	7.64444	26286			SGITpSPVEK	1	S(1): 0.0; T(4): 0.1; S(5): 99.9	106	Reverse	Class I
O14686	1	Histone-lysine N-methyltransferase MLL2 OS=Homo sapiens GN=MLL2 PE=1 SV=1 - [MLL2_HUMAN]	O14686	S2855	Histone-lysine N-methyltransferase MLL2 (EC 2.1.1.43) (ALL1-related protein) (Lysine N-methyltransferase 2B) (KMT2B) (Myeloid/lymphoid or mixed-lineage leukemia protein 2)	MLL2 ALR KMT2B	EEGGRHPSPCQFTIA	0.855432	-0.225275	0.765612	-0.385315	13300000	15600000	28900000	7.4609	148319			VEEGGRHPpSPCQFTIATPK	1	S(9): 100.0; T(14): 0.0; T(17): 0.0	152	Reverse	Class I
O14686	1	Histone-lysine N-methyltransferase MLL2 OS=Homo sapiens GN=MLL2 PE=1 SV=1 - [MLL2_HUMAN]	O14686	S4084	Histone-lysine N-methyltransferase MLL2 (EC 2.1.1.43) (ALL1-related protein) (Lysine N-methyltransferase 2B) (KMT2B) (Myeloid/lymphoid or mixed-lineage leukemia protein 2)	MLL2 ALR KMT2B	EPPPGRVSPAAAQLA	2.34192	1.22769	2.09602	1.06765	469000	200000	669000	5.82543	101953			VpSPAAAQLADTLFSK	1	S(2): 100.0; T(11): 0.0; S(14): 0.0	284	Reverse	Class I
O14686	1	Histone-lysine N-methyltransferase MLL2 OS=Homo sapiens GN=MLL2 PE=1 SV=1 - [MLL2_HUMAN]	O14686	S4463	Histone-lysine N-methyltransferase MLL2 (EC 2.1.1.43) (ALL1-related protein) (Lysine N-methyltransferase 2B) (KMT2B) (Myeloid/lymphoid or mixed-lineage leukemia protein 2)	MLL2 ALR KMT2B	EQEDRALSPVIPLIP	1.07643	0.106249	0.963402	-0.0537909	257000000	239000000	496000000	8.69548	120802			ALpSPVIPLIPR	1	S(3): 100.0	95	Reverse	Class I
O14686	1	Histone-lysine N-methyltransferase MLL2 OS=Homo sapiens GN=MLL2 PE=1 SV=1 - [MLL2_HUMAN]	O14686	S4547	Histone-lysine N-methyltransferase MLL2 (EC 2.1.1.43) (ALL1-related protein) (Lysine N-methyltransferase 2B) (KMT2B) (Myeloid/lymphoid or mixed-lineage leukemia protein 2)	MLL2 ALR KMT2B	YEVLFPESPARGGTE	0.957854	-0.0621217	0.85728	-0.222162	33500000	35000000	68500000	7.83569	30179			IPNSYEVLFPEpSPAR	1	S(4): 0.0; Y(5): 0.0; S(12): 100.0	66	Reverse	Class I
O14686	1	Histone-lysine N-methyltransferase MLL2 OS=Homo sapiens GN=MLL2 PE=1 SV=1 - [MLL2_HUMAN]	O14686	S4574	Histone-lysine N-methyltransferase MLL2 (EC 2.1.1.43) (ALL1-related protein) (Lysine N-methyltransferase 2B) (KMT2B) (Myeloid/lymphoid or mixed-lineage leukemia protein 2)	MLL2 ALR KMT2B	EKGLEGKSPDTGPDW	0.925069	-0.112367	0.827937	-0.272407	1050000	1140000	2190000	6.34044	132224			GLEGKpSPDTGPDWLK	1	S(6): 99.6; T(9): 0.4	103	Reverse	Class I
O14686	1	Histone-lysine N-methyltransferase MLL2 OS=Homo sapiens GN=MLL2 PE=1 SV=1 - [MLL2_HUMAN]	O14686	T1528	Histone-lysine N-methyltransferase MLL2 (EC 2.1.1.43) (ALL1-related protein) (Lysine N-methyltransferase 2B) (KMT2B) (Myeloid/lymphoid or mixed-lineage leukemia protein 2)	MLL2 ALR KMT2B	RPSFGLGTPKAKGDG	1.002	0.00288828	0.896794	-0.157152	5210000	5200000	10410000	7.01745	136369			ALFAVGVGRPSFGLGpTPK	1	S(11): 0.0; T(16): 100.0	98	Reverse	Class I
O14686	1	Histone-lysine N-methyltransferase MLL2 OS=Homo sapiens GN=MLL2 PE=1 SV=1 - [MLL2_HUMAN]	O14686	T1965	Histone-lysine N-methyltransferase MLL2 (EC 2.1.1.43) (ALL1-related protein) (Lysine N-methyltransferase 2B) (KMT2B) (Myeloid/lymphoid or mixed-lineage leukemia protein 2)	MLL2 ALR KMT2B	TPRHQPSTPDPFLKP	1.19332	0.254978	1.06802	0.0949374	41200000	34600000	75800000	7.87967	79058			HQPSpTPDPFLKPR	1	S(4): 0.0; T(5): 100.0	177	Reverse	Class I
O14686	1	Histone-lysine N-methyltransferase MLL2 OS=Homo sapiens GN=MLL2 PE=1 SV=1 - [MLL2_HUMAN]	O14686	T2057	Histone-lysine N-methyltransferase MLL2 (EC 2.1.1.43) (ALL1-related protein) (Lysine N-methyltransferase 2B) (KMT2B) (Myeloid/lymphoid or mixed-lineage leukemia protein 2)	MLL2 ALR KMT2B	DVFKAPLTPRASQVE	0.700771	-0.512985	0.62719	-0.673026	1370000	1950000	3320000	6.52114	135933			TPDVFKAPLpTPR	1	T(1): 0.0; T(10): 100.0	125	Reverse	Class I
O14713	1	Integrin beta-1-binding protein 1 OS=Homo sapiens GN=ITGB1BP1 PE=1 SV=1 - [ITBP1_HUMAN]	O14713	S41	Integrin beta-1-binding protein 1 (Integrin cytoplasmic domain-associated protein 1) (ICAP-1)	ITGB1BP1 ICAP1	SRSSTVASLDTDSTK	0.809061	-0.305679	0.72411	-0.465719	8520000	10500000	19020000	7.27921	114560			SSTVApSLDTDSTK	1	S(1): 0.0; S(2): 0.0; T(3): 0.0; S(6): 100.0; T(9): 0.0; S(11): 0.0; T(12): 0.0	127	Reverse	Class I
O14745	1	Ezrin-radixin-moesin-binding phosphoprotein 50 OS=Homo sapiens GN=SLC9A3R1 PE=1 SV=4 - [NHERF_HUMAN]	O14745	S280	Na(+)/H(+) exchange regulatory cofactor NHE-RF1 (NHERF-1) (Ezrin-radixin-moesin-binding phosphoprotein 50) (EBP50) (Regulatory cofactor of Na(+)/H(+) exchanger) (Sodium-hydrogen exchanger regulatory factor 1) (Solute carrier family 9 isoform A3 regulatory factor 1)	SLC9A3R1 NHERF NHERF1	LAEAALESPRPALVR	0.794913	-0.331132	0.711447	-0.491172	137000000	172000000	309000000	8.48996	55995	Atypical/PIKK/FRAP	FRAP	EALAEAALEpSPRPALVR	1	S(10): 100.0	204	Reverse	Class I
O14745	1	Ezrin-radixin-moesin-binding phosphoprotein 50 OS=Homo sapiens GN=SLC9A3R1 PE=1 SV=4 - [NHERF_HUMAN]	O14745	S288	Na(+)/H(+) exchange regulatory cofactor NHE-RF1 (NHERF-1) (Ezrin-radixin-moesin-binding phosphoprotein 50) (EBP50) (Regulatory cofactor of Na(+)/H(+) exchanger) (Sodium-hydrogen exchanger regulatory factor 1) (Solute carrier family 9 isoform A3 regulatory factor 1)	SLC9A3R1 NHERF NHERF1	PRPALVRSASSDTSE	1.16279	0.217591	1.0407	0.057551	2820000	2430000	5250000	6.72016	103117	Atypical/PIKK/FRAP	FRAP	pSASSDTSEELNSQDSPPK	1	S(1): 84.6; S(3): 7.0; S(4): 7.0; T(6): 0.7; S(7): 0.7; S(12): 0.0; S(15): 0.0	87	Reverse	Class I
O14745	1	Ezrin-radixin-moesin-binding phosphoprotein 50 OS=Homo sapiens GN=SLC9A3R1 PE=1 SV=4 - [NHERF_HUMAN]	O14745	S290	Na(+)/H(+) exchange regulatory cofactor NHE-RF1 (NHERF-1) (Ezrin-radixin-moesin-binding phosphoprotein 50) (EBP50) (Regulatory cofactor of Na(+)/H(+) exchanger) (Sodium-hydrogen exchanger regulatory factor 1) (Solute carrier family 9 isoform A3 regulatory factor 1)	SLC9A3R1 NHERF NHERF1	PALVRSASSDTSEEL	1.3587	0.442222	1.21603	0.282182	8070000	5940000	14010000	7.14644	99877	CAMK/PKD	PKD1, PKD2, PKD3	SApSSDTSEELNSQDSPPK	1	S(1): 0.3; S(3): 99.5; S(4): 0.3; T(6): 0.0; S(7): 0.0; S(12): 0.0; S(15): 0.0	296	Reverse	Class I
O14828	1	Secretory carrier-associated membrane protein 3 OS=Homo sapiens GN=SCAMP3 PE=1 SV=3 - [SCAM3_HUMAN]	O14828	S76	Secretory carrier-associated membrane protein 3 (Secretory carrier membrane protein 3)	SCAMP3 C1orf3 PROPIN1	LQPSRKLSPTEPKNY	1.09649	0.132894	0.98136	-0.0271461	5450000	4970000	10420000	7.01787	50650	CMGC	CLK2	KLpSPTEPK	1	S(3): 100.0; T(5): 0.0	144	Reverse	Class I
O14874	1	[3-methyl-2-oxobutanoate dehydrogenase [lipoamide]] kinase, mitochondrial OS=Homo sapiens GN=BCKDK PE=1 SV=2 - [BCKD_HUMAN]	O14874	S31	[3-methyl-2-oxobutanoate dehydrogenase [lipoamide]] kinase, mitochondrial (EC 2.7.11.4) (Branched-chain alpha-ketoacid dehydrogenase kinase) (BCKD-kinase) (BCKDHKIN)	BCKDK	ALALRARSTSATDTH	1.1534	0.205896	1.0323	0.0458557	142000000	123000000	265000000	8.42325	149685			pSTSATDTHHVEMAR	1	S(1): 94.9; T(2): 5.1; S(3): 0.0; T(5): 0.0; T(7): 0.0	234	Reverse	Class I
O14874	1	[3-methyl-2-oxobutanoate dehydrogenase [lipoamide]] kinase, mitochondrial OS=Homo sapiens GN=BCKDK PE=1 SV=2 - [BCKD_HUMAN]	O14874	S33	[3-methyl-2-oxobutanoate dehydrogenase [lipoamide]] kinase, mitochondrial (EC 2.7.11.4) (Branched-chain alpha-ketoacid dehydrogenase kinase) (BCKD-kinase) (BCKDHKIN)	BCKDK	ALRARSTSATDTHHV	1.25945	0.332789	1.1272	0.172749	9440000	7490000	16930000	7.22866	72190			STpSATDTHHVEMAR	1	S(1): 0.4; T(2): 0.4; S(3): 98.8; T(5): 0.4; T(7): 0.0	154	Reverse	Class I
O14908	1	PDZ domain-containing protein GIPC1 OS=Homo sapiens GN=GIPC1 PE=1 SV=2 - [GIPC1_HUMAN]	O14908	S232	PDZ domain-containing protein GIPC1 (GAIP C-terminus-interacting protein) (RGS-GAIP-interacting protein) (RGS19-interacting protein 1) (Tax interaction protein 2) (TIP-2)	GIPC1 C19orf3 GIPC RGS19IP1	SAGGRPGSGPQLGTG	1.39082	0.475936	1.24478	0.315896	34200000	24600000	58800000	7.76938	59917			SAGGRPGpSGPQLGTGR	1	S(1): 0.0; S(8): 100.0; T(14): 0.0	236	Reverse	Class I
O14908	1	PDZ domain-containing protein GIPC1 OS=Homo sapiens GN=GIPC1 PE=1 SV=2 - [GIPC1_HUMAN]	O14908	T242	PDZ domain-containing protein GIPC1 (GAIP C-terminus-interacting protein) (RGS-GAIP-interacting protein) (RGS19-interacting protein 1) (Tax interaction protein 2) (TIP-2)	GIPC1 C19orf3 GIPC RGS19IP1	QLGTGRGTLRLRSRG	1	0	0.895	-0.16004	74900000	74900000	149800000	8.17551	72887			SAGGRPGSGPQLGTGRGpTLR	1	S(1): 0.0; S(8): 0.0; T(14): 0.0; T(18): 100.0	220	Reverse	Class I
O14920	1	Inhibitor of nuclear factor kappa-B kinase subunit beta OS=Homo sapiens GN=IKBKB PE=1 SV=1 - [IKKB_HUMAN]	O14920	S672	Inhibitor of nuclear factor kappa-B kinase subunit beta (I-kappa-B-kinase beta) (IKK-B) (IKK-beta) (IkBKB) (EC 2.7.11.10) (I-kappa-B kinase 2) (IKK2) (Nuclear factor NF-kappa-B inhibitor kinase beta) (NFKBIKB)	IKBKB IKKB	VRGPVSGSPDSMNAS	1.04712	0.0664274	0.937173	-0.0936131	13300000	12700000	26000000	7.41497	143817	Atypical/PIKK/FRAP	FRAP	VRGPVSGpSPDSMNASR	1	S(6): 0.0; S(8): 99.3; S(11): 0.6; S(15): 0.0	160	Reverse	Class I
O14924	1	Regulator of G-protein signaling 12 OS=Homo sapiens GN=RGS12 PE=1 SV=1 - [RGS12_HUMAN]	O14924	S16	Regulator of G-protein signaling 12 (RGS12)	RGS12	KRPLPGPSPPRVRSV	1.24378	0.314733	1.11318	0.154692	3960000	3180000	7140000	6.8537	83966			RPLPGPpSPPRVR	1	S(7): 100.0	98	Reverse	Class I
O14924	1	Regulator of G-protein signaling 12 OS=Homo sapiens GN=RGS12 PE=1 SV=1 - [RGS12_HUMAN]	O14924	S170	Regulator of G-protein signaling 12 (RGS12)	RGS12	PLKLKQRSLSESAAT	1.7762	0.828793	1.5897	0.668753	6610000	3720000	10330000	7.0141	22219			pSLSESAATR	1	S(1): 99.5; S(3): 0.5; S(5): 0.0; T(8): 0.0	117	Reverse	Class I
O14924	1	Regulator of G-protein signaling 12 OS=Homo sapiens GN=RGS12 PE=1 SV=1 - [RGS12_HUMAN]	O14924	S172	Regulator of G-protein signaling 12 (RGS12)	RGS12	KLKQRSLSESAATRF	1.28041	0.356606	1.14597	0.196565	21000000	16400000	37400000	7.57287	113055			SLpSESAATR	1	S(1): 0.0; S(3): 100.0; S(5): 0.0; T(8): 0.0	86	Reverse	Class I
O14924	1	Regulator of G-protein signaling 12 OS=Homo sapiens GN=RGS12 PE=1 SV=1 - [RGS12_HUMAN]	O14924	S448	Regulator of G-protein signaling 12 (RGS12)	RGS12	VDLGGSSSRHGPGGS	1.10375	0.142417	0.987859	-0.0176234	3490000	3170000	6660000	6.82347	118951			VLVVDLGGSSpSR	1	S(9): 5.0; S(10): 5.0; S(11): 90.0	97	Reverse	Class I
O14924	1	Regulator of G-protein signaling 12 OS=Homo sapiens GN=RGS12 PE=1 SV=1 - [RGS12_HUMAN]	O14924	S671	Regulator of G-protein signaling 12 (RGS12)	RGS12	DLESATVSDGELTGA	1.00503	0.00723157	0.899497	-0.152809	18600000	18500000	37100000	7.56937	20886			SLDDLESATVpSDGELTGADLK	1	S(1): 0.0; S(7): 0.0; T(9): 0.0; S(11): 99.9; T(16): 0.0	118	Reverse	Class I
O14924	1	Regulator of G-protein signaling 12 OS=Homo sapiens GN=RGS12 PE=1 SV=1 - [RGS12_HUMAN]	O14924	S850	Regulator of G-protein signaling 12 (RGS12)	RGS12	DSQQVPSSPASKHSL	1.99203	0.994241	1.78287	0.8342	59700000	29900000	89600000	7.95231	26717	STE/STE7	MAP2K2	ALPDSQQVPSpSPASK	1	S(5): 0.0; S(10): 5.3; S(11): 94.7; S(14): 0.0	119	Reverse	Class I
O14924	1	Regulator of G-protein signaling 12 OS=Homo sapiens GN=RGS12 PE=1 SV=1 - [RGS12_HUMAN]	O14924	S853	Regulator of G-protein signaling 12 (RGS12)	RGS12	QVPSSPASKHSLGSD	1.02145	0.0306192	0.914198	-0.129421	8310000	8130000	16440000	7.2159	109376			ALPDSQQVPSSPApSK	1	S(5): 0.0; S(10): 0.4; S(11): 5.9; S(14): 93.7	115	Reverse	Class I
O14924	1	Regulator of G-protein signaling 12 OS=Homo sapiens GN=RGS12 PE=1 SV=1 - [RGS12_HUMAN]	O14924	S879	Regulator of G-protein signaling 12 (RGS12)	RGS12	GKSKSGRSLNEELGD	0.0191869	-5.70374	0.0171722	-5.86378	232000	12100000	12332000	7.09103	162194			SGRpSLNEELGDEDSEKK	1	S(1): 1.7; S(4): 98.3; S(14): 0.0	92	Reverse	Class I
O14974	1	Protein phosphatase 1 regulatory subunit 12A OS=Homo sapiens GN=PPP1R12A PE=1 SV=1 - [MYPT1_HUMAN]	O14974	S422	Protein phosphatase 1 regulatory subunit 12A (Myosin phosphatase-targeting subunit 1) (Myosin phosphatase target subunit 1) (Protein phosphatase myosin-binding subunit)	PPP1R12A MBS MYPT1	PTTATKISPKEEERK	1.21359	0.279284	1.08617	0.119243	16600000	13700000	30300000	7.48144	166095	CMGC/CDK	CDK6, CDK7	KFPTTATKIpSPK	1	T(4): 0.0; T(5): 0.0; T(7): 0.0; S(10): 100.0	163	Reverse	Class I
O14974	1	Protein phosphatase 1 regulatory subunit 12A OS=Homo sapiens GN=PPP1R12A PE=1 SV=1 - [MYPT1_HUMAN]	O14974	S445	Protein phosphatase 1 regulatory subunit 12A (Myosin phosphatase-targeting subunit 1) (Myosin phosphatase target subunit 1) (Protein phosphatase myosin-binding subunit)	PPP1R12A MBS MYPT1	LGLRKTGSYGALAEI	1.10497	0.14401	0.98895	-0.0160301	1190000000	1070000000	2260000000	9.35411	29370	CAMK/CAMK2	CaMK2d, CaMK2g	TGpSYGALAEITASK	1	T(1): 0.1; S(3): 99.8; Y(4): 0.1; T(11): 0.0; S(13): 0.0	159	Reverse	Class I
O14974	1	Protein phosphatase 1 regulatory subunit 12A OS=Homo sapiens GN=PPP1R12A PE=1 SV=1 - [MYPT1_HUMAN]	O14974	S507	Protein phosphatase 1 regulatory subunit 12A (Myosin phosphatase-targeting subunit 1) (Myosin phosphatase target subunit 1) (Protein phosphatase myosin-binding subunit)	PPP1R12A MBS MYPT1	TIPRRLASTSDIEEK	1.46628	0.552156	1.31232	0.392116	168000000	115000000	283000000	8.45179	59838	CAMK/CAMK2	CaMK2d, CaMK2g	RLApSTSDIEEK	1	S(4): 99.5; T(5): 0.5; S(6): 0.0	116	Reverse	Class I
O14974	1	Protein phosphatase 1 regulatory subunit 12A OS=Homo sapiens GN=PPP1R12A PE=1 SV=1 - [MYPT1_HUMAN]	O14974	S871	Protein phosphatase 1 regulatory subunit 12A (Myosin phosphatase-targeting subunit 1) (Myosin phosphatase target subunit 1) (Protein phosphatase myosin-binding subunit)	PPP1R12A MBS MYPT1	ENEQEQQSDTEEGSN	1.40252	0.488026	1.25526	0.327986	67000000	47800000	114800000	8.05994	125421	AGC/GRK	BARK1	STGVSFWTQDSDENEQEQQpSDTEEGSNKK	1	S(1): 0.0; T(2): 0.0; S(5): 0.0; T(8): 0.0; S(11): 0.0; S(20): 99.9; T(22): 0.0; S(26): 0.0	221	Reverse	Class I
O14974	1	Protein phosphatase 1 regulatory subunit 12A OS=Homo sapiens GN=PPP1R12A PE=1 SV=1 - [MYPT1_HUMAN]	O14974	S903	Protein phosphatase 1 regulatory subunit 12A (Myosin phosphatase-targeting subunit 1) (Myosin phosphatase target subunit 1) (Protein phosphatase myosin-binding subunit)	PPP1R12A MBS MYPT1	SAGDRYDSLLGRSGS	0.501505	-0.995665	0.448847	-1.15571	5250000	10500000	15750000	7.19728	131756	TKL/RAF	RAF1	YETSSTSAGDRYDpSLLGR	1	Y(1): 0.0; T(3): 0.0; S(4): 0.0; S(5): 0.0; T(6): 0.0; S(7): 0.0; Y(12): 0.0; S(14): 100.0	200	Reverse	Class I
O14974	1	Protein phosphatase 1 regulatory subunit 12A OS=Homo sapiens GN=PPP1R12A PE=1 SV=1 - [MYPT1_HUMAN]	O14974	S908	Protein phosphatase 1 regulatory subunit 12A (Myosin phosphatase-targeting subunit 1) (Myosin phosphatase target subunit 1) (Protein phosphatase myosin-binding subunit)	PPP1R12A MBS MYPT1	YDSLLGRSGSYSYLE	1.49031	0.575615	1.33383	0.415575	26900000	18100000	45000000	7.65321	110019			pSGSYSYLEER	1	S(1): 100.0; S(3): 0.0; Y(4): 0.0; S(5): 0.0; Y(6): 0.0	92	Reverse	Class I
O14974	1	Protein phosphatase 1 regulatory subunit 12A OS=Homo sapiens GN=PPP1R12A PE=1 SV=1 - [MYPT1_HUMAN]	O14974	S910	Protein phosphatase 1 regulatory subunit 12A (Myosin phosphatase-targeting subunit 1) (Myosin phosphatase target subunit 1) (Protein phosphatase myosin-binding subunit)	PPP1R12A MBS MYPT1	SLLGRSGSYSYLEER	0.951475	-0.0717627	0.85157	-0.231803	65800000	69200000	135000000	8.13033	27716	CAMK/MLCK	caMLCK, smMLCK	SGpSYSYLEER	1	S(1): 0.0; S(3): 100.0; Y(4): 0.0; S(5): 0.0; Y(6): 0.0	163	Reverse	Class I
O14974	1	Protein phosphatase 1 regulatory subunit 12A OS=Homo sapiens GN=PPP1R12A PE=1 SV=1 - [MYPT1_HUMAN]	O14974	T443	Protein phosphatase 1 regulatory subunit 12A (Myosin phosphatase-targeting subunit 1) (Myosin phosphatase target subunit 1) (Protein phosphatase myosin-binding subunit)	PPP1R12A MBS MYPT1	WRLGLRKTGSYGALA	1.9802	0.985645	1.77228	0.825604	572000	289000	861000	5.935	94979			pTGSYGALAEITASK	1	T(1): 99.7; S(3): 0.3; Y(4): 0.0; T(11): 0.0; S(13): 0.0	272	Reverse	Class I
O14974	1	Protein phosphatase 1 regulatory subunit 12A OS=Homo sapiens GN=PPP1R12A PE=1 SV=1 - [MYPT1_HUMAN]	O14974	T696	Protein phosphatase 1 regulatory subunit 12A (Myosin phosphatase-targeting subunit 1) (Myosin phosphatase target subunit 1) (Protein phosphatase myosin-binding subunit)	PPP1R12A MBS MYPT1	ARQSRRSTQGVTLTD	1.07759	0.107803	0.96444	-0.0522371	410000000	381000000	791000000	8.89818	135649	CAMK/DAPK	DAPK3	RSpTQGVTLTDLQEAEK	1	S(2): 0.4; T(3): 99.6; T(7): 0.0; T(9): 0.0	292	Reverse	Class I
O14974	1	Protein phosphatase 1 regulatory subunit 12A OS=Homo sapiens GN=PPP1R12A PE=1 SV=1 - [MYPT1_HUMAN]	O14974	Y446	Protein phosphatase 1 regulatory subunit 12A (Myosin phosphatase-targeting subunit 1) (Myosin phosphatase target subunit 1) (Protein phosphatase myosin-binding subunit)	PPP1R12A MBS MYPT1	GLRKTGSYGALAEIT	1.11982	0.163268	1.00224	0.00322751	262000000	234000000	496000000	8.69548	29373	TK/Axl	MER	TGSpYGALAEITASK	1	T(1): 5.9; S(3): 5.9; Y(4): 88.2; T(11): 0.0; S(13): 0.0	93	Reverse	Class I
O14974	1	Protein phosphatase 1 regulatory subunit 12A OS=Homo sapiens GN=PPP1R12A PE=1 SV=1 - [MYPT1_HUMAN]	O14974	Y901	Protein phosphatase 1 regulatory subunit 12A (Myosin phosphatase-targeting subunit 1) (Myosin phosphatase target subunit 1) (Protein phosphatase myosin-binding subunit)	PPP1R12A MBS MYPT1	STSAGDRYDSLLGRS	0.566251	-0.820485	0.506795	-0.980526	5770000	10200000	15970000	7.2033	135787	TK/Src	FYN	YETSSTSAGDRpYDSLLGR	1	Y(1): 0.0; T(3): 0.0; S(4): 0.0; S(5): 0.0; T(6): 0.0; S(7): 0.0; Y(12): 93.3; S(14): 6.6	80	Reverse	Class I
O14979	1	Heterogeneous nuclear ribonucleoprotein D-like OS=Homo sapiens GN=HNRPDL PE=1 SV=3 - [HNRDL_HUMAN]	O14979	S241	Heterogeneous nuclear ribonucleoprotein D-like (hnRNP D-like) (hnRNP DL) (AU-rich element RNA-binding factor) (JKT41-binding protein) (Protein laAUF1)	HNRPDL JKTBP	KVFVGGLSPDTSEEQ	1.06496	0.0908029	0.953142	-0.0692375	155000000	145000000	300000000	8.47712	29187			VFVGGLpSPDTSEEQIK	1	S(7): 100.0; T(10): 0.0; S(11): 0.0	179	Reverse	Class I
O14981	1	TATA-binding protein-associated factor 172 OS=Homo sapiens GN=BTAF1 PE=1 SV=2 - [BTAF1_HUMAN]	O14981	T426	TATA-binding protein-associated factor 172 (EC 3.6.4.-) (ATP-dependent helicase BTAF1) (B-TFIID transcription factor-associated 170 kDa subunit) (TAF(II)170) (TBP-associated factor 172) (TAF-172)	BTAF1 TAF172	VRQDVINTLLPKVLT	0.919118	-0.121679	0.82261	-0.281719	71200000	77400000	148600000	8.17202	116009			QDVINpTLLPK	1	T(6): 100.0	87	Reverse	Class I
O15013	1	Rho guanine nucleotide exchange factor 10 OS=Homo sapiens GN=ARHGEF10 PE=1 SV=4 - [ARHGA_HUMAN]	O15013	S1232	Rho guanine nucleotide exchange factor 10	ARHGEF10 KIAA0294	DKDKSRDSLAPGPEP	1.34048	0.422752	1.19973	0.262712	12400000	9270000	21670000	7.33586	134083			SRDpSLAPGPEPQDEDQK	1	S(1): 0.0; S(4): 100.0	148	Reverse	Class I
O15013	1	Rho guanine nucleotide exchange factor 10 OS=Homo sapiens GN=ARHGEF10 PE=1 SV=4 - [ARHGA_HUMAN]	O15013	S379	Rho guanine nucleotide exchange factor 10	ARHGEF10 KIAA0294	RSFIRTKSLIAQDHR	1.04493	0.0634092	0.935214	-0.0966312	5290000	5060000	10350000	7.01494	129617			pSLIAQDHR	1	S(1): 100.0	166	Reverse	Class I
O15013	1	Rho guanine nucleotide exchange factor 10 OS=Homo sapiens GN=ARHGEF10 PE=1 SV=4 - [ARHGA_HUMAN]	O15013	S691	Rho guanine nucleotide exchange factor 10	ARHGEF10 KIAA0294	HDSRVMSSQRYLLKW	1.25	0.321928	1.11875	0.161888	6040000	4830000	10870000	7.03623	16424			VMSpSQRYLLK	1	S(3): 8.6; S(4): 82.7; Y(7): 8.6	39	Reverse	Class I
O15014	1	Zinc finger protein 609 OS=Homo sapiens GN=ZNF609 PE=1 SV=2 - [ZN609_HUMAN]	O15014	S1055	Zinc finger protein 609	ZNF609 KIAA0295	PTLTKAPSLTDLVKS	1.15207	0.204233	1.03111	0.0441926	54200000	47000000	101200000	8.00518	24734			APpSLTDLVK	1	S(3): 100.0; T(5): 0.0	114	Reverse	Class I
O15014	1	Zinc finger protein 609 OS=Homo sapiens GN=ZNF609 PE=1 SV=2 - [ZN609_HUMAN]	O15014	S1285	Zinc finger protein 609	ZNF609 KIAA0295	DADKARASPSVTCKS	0.987167	-0.0186342	0.883514	-0.178675	6760000	6850000	13610000	7.13386	143418			ARApSPSVTCK	1	S(4): 100.0; S(6): 0.0; T(8): 0.0	122	Reverse	Class I
O15014	1	Zinc finger protein 609 OS=Homo sapiens GN=ZNF609 PE=1 SV=2 - [ZN609_HUMAN]	O15014	S1313	Zinc finger protein 609	ZNF609 KIAA0295	ASHYKSKSPTISDKT	0.674309	-0.568519	0.603506	-0.728559	1700000	2510000	4210000	6.62428	164524			SKpSPTISDKTSQER	1	S(1): 0.1; S(3): 99.8; T(5): 0.1; S(7): 0.0; T(10): 0.0; S(11): 0.0	140	Reverse	Class I
O15014	1	Zinc finger protein 609 OS=Homo sapiens GN=ZNF609 PE=1 SV=2 - [ZN609_HUMAN]	O15014	S358	Zinc finger protein 609	ZNF609 KIAA0295	APPRFCDSPTSDLEM	1.14286	0.192645	1.02286	0.0326047	57400000	50200000	107600000	8.03181	27498			FCDpSPTSDLEMR	1	S(4): 94.3; T(6): 2.9; S(7): 2.9	139	Reverse	Class I
O15014	1	Zinc finger protein 609 OS=Homo sapiens GN=ZNF609 PE=1 SV=2 - [ZN609_HUMAN]	O15014	S467	Zinc finger protein 609	ZNF609 KIAA0295	SKRVRTNSMGSATGP	1.41243	0.498179	1.26412	0.338138	91700000	64900000	156600000	8.19479	114206			TNpSMGSATGPLPGTK	1	T(1): 5.2; S(3): 94.8; S(6): 0.0; T(8): 0.0; T(14): 0.0	119	Reverse	Class I
O15014	1	Zinc finger protein 609 OS=Homo sapiens GN=ZNF609 PE=1 SV=2 - [ZN609_HUMAN]	O15014	S576	Zinc finger protein 609	ZNF609 KIAA0295	VRLVEPHSPSPSSKF	1.07296	0.101598	0.9603	-0.0584423	305000000	284000000	589000000	8.77012	133673			LVEPHpSPSPSSK	1	S(6): 100.0; S(8): 0.0; S(10): 0.0; S(11): 0.0	165	Reverse	Class I
O15014	1	Zinc finger protein 609 OS=Homo sapiens GN=ZNF609 PE=1 SV=2 - [ZN609_HUMAN]	O15014	S578	Zinc finger protein 609	ZNF609 KIAA0295	LVEPHSPSPSSKFST	0.903342	-0.146655	0.808491	-0.306696	37100000	41100000	78200000	7.89321	112651			LVEPHpSPpSPSSK	2	S(6): 95.6; S(8): 95.6; S(10): 8.2; S(11): 0.6	77	Reverse	Class I
O15014	1	Zinc finger protein 609 OS=Homo sapiens GN=ZNF609 PE=1 SV=2 - [ZN609_HUMAN]	O15014	S580	Zinc finger protein 609	ZNF609 KIAA0295	EPHSPSPSSKFSTKG	0.782473	-0.353888	0.700313	-0.513928	503000	642000	1145000	6.05881	139556			VRLVEPHpSPSPpSSK	2	S(8): 99.3; S(10): 8.3; S(12): 91.7; S(13): 0.7	85	Reverse	Class I
O15014	1	Zinc finger protein 609 OS=Homo sapiens GN=ZNF609 PE=1 SV=2 - [ZN609_HUMAN]	O15014	S758	Zinc finger protein 609	ZNF609 KIAA0295	CRAEEGKSPFRESSG	1.13122	0.177882	1.01244	0.0178413	73600000	65100000	138700000	8.14208	147259			AEEGKpSPFRESSGDGMK	1	S(6): 100.0; S(11): 0.0; S(12): 0.0	254	Reverse	Class I
O15014	1	Zinc finger protein 609 OS=Homo sapiens GN=ZNF609 PE=1 SV=2 - [ZN609_HUMAN]	O15014	S804	Zinc finger protein 609	ZNF609 KIAA0295	SFTDNAPSPSIGGSS	1.0582	0.0816138	0.94709	-0.0784266	31500000	29800000	61300000	7.78746	24545			IYSFTDNAPpSPSIGGSSR	1	Y(2): 0.0; S(3): 0.0; T(5): 0.0; S(10): 100.0; S(12): 0.0; S(16): 0.0; S(17): 0.0	274	Reverse	Class I
O15014	1	Zinc finger protein 609 OS=Homo sapiens GN=ZNF609 PE=1 SV=2 - [ZN609_HUMAN]	O15014	S842	Zinc finger protein 609	ZNF609 KIAA0295	ASSVKTNSPAYSDIS	1.19474	0.2567	1.0693	0.0966601	3580000	2990000	6570000	6.81757	124916			TNpSPAYSDISDAGEDGEGKVDSVK	1	T(1): 1.1; S(3): 97.7; Y(6): 1.1; S(7): 0.0; S(10): 0.0; S(22): 0.0	126	Reverse	Class I
O15014	1	Zinc finger protein 609 OS=Homo sapiens GN=ZNF609 PE=1 SV=2 - [ZN609_HUMAN]	O15014	S846	Zinc finger protein 609	ZNF609 KIAA0295	KTNSPAYSDISDAGE	0.412201	-1.27858	0.36892	-1.43862	1280000	3110000	4390000	6.64246	98937			TNpSPAYpSDIpSDAGEDGEGKVDSVK	3	T(1): 1.3; S(3): 98.7; Y(6): 2.6; S(7): 98.7; S(10): 98.7; S(22): 0.0	71	Reverse	Class I
O15014	1	Zinc finger protein 609 OS=Homo sapiens GN=ZNF609 PE=1 SV=2 - [ZN609_HUMAN]	O15014	S849	Zinc finger protein 609	ZNF609 KIAA0295	SPAYSDISDAGEDGE	0.412201	-1.27858	0.36892	-1.43862	1280000	3110000	4390000	6.64246	98937			TNpSPAYpSDIpSDAGEDGEGKVDSVK	3	T(1): 1.3; S(3): 98.7; Y(6): 2.6; S(7): 98.7; S(10): 98.7; S(22): 0.0	71	Reverse	Class I
O15014	1	Zinc finger protein 609 OS=Homo sapiens GN=ZNF609 PE=1 SV=2 - [ZN609_HUMAN]	O15014	T746	Zinc finger protein 609	ZNF609 KIAA0295	KELESPLTPGKVCRA	1.06045	0.0846703	0.949099	-0.0753701	146000000	137000000	283000000	8.45179	116541			ELESPLpTPGK	1	S(4): 0.0; T(7): 100.0	116	Reverse	Class I
O15014	1	Zinc finger protein 609 OS=Homo sapiens GN=ZNF609 PE=1 SV=2 - [ZN609_HUMAN]	O15014	T799	Zinc finger protein 609	ZNF609 KIAA0295	ADKIYSFTDNAPSPS	0.844595	-0.243669	0.755912	-0.403709	7830000	9270000	17100000	7.233	24350			IYSFpTDNAPSPSIGGSSR	1	Y(2): 0.0; S(3): 0.0; T(5): 99.0; S(10): 1.0; S(12): 0.0; S(16): 0.0; S(17): 0.0	151	Reverse	Class I
O15020	1	Spectrin beta chain, brain 2 OS=Homo sapiens GN=SPTBN2 PE=1 SV=2 - [SPTN2_HUMAN]	O15020	S2384	Spectrin beta chain, brain 2 (Beta-III spectrin) (Spectrin, non-erythroid beta chain 2)	SPTBN2 KIAA0302	REREKRFSFFKKNK*	1.23001	0.298673	1.10086	0.138632	1830000	1490000	3320000	6.52114	84949			RFpSFFKK	1	S(3): 100.0	179	Reverse	Class I
O15021	1	Microtubule-associated serine/threonine-protein kinase 4 OS=Homo sapiens GN=MAST4 PE=1 SV=2 - [MAST4_HUMAN]	O15021	S1191	Microtubule-associated serine/threonine-protein kinase 4 (EC 2.7.11.1)	MAST4 KIAA0303	YRSGRRKSAGNIPLS	1.50376	0.588574	1.34586	0.428533	94800000	63000000	157800000	8.19811	29085			pSAGNIPLSPLAR	1	S(1): 100.0; S(8): 0.0	49	Reverse	Class I
O15021	1	Microtubule-associated serine/threonine-protein kinase 4 OS=Homo sapiens GN=MAST4 PE=1 SV=2 - [MAST4_HUMAN]	O15021	S1198	Microtubule-associated serine/threonine-protein kinase 4 (EC 2.7.11.1)	MAST4 KIAA0303	SAGNIPLSPLARTPS	0.360881	-1.47041	0.322988	-1.63045	3060000	8470000	11530000	7.06183	28713			SAGNIPLpSPLAR	1	S(1): 0.0; S(8): 100.0	117	Reverse	Class I
O15021	1	Microtubule-associated serine/threonine-protein kinase 4 OS=Homo sapiens GN=MAST4 PE=1 SV=2 - [MAST4_HUMAN]	O15021	S1205	Microtubule-associated serine/threonine-protein kinase 4 (EC 2.7.11.1)	MAST4 KIAA0303	SPLARTPSPTPQPTS	1.02145	0.0306192	0.914198	-0.129421	8680000	8500000	17180000	7.23502	21859			TPpSPTPQPTSPQR	1	T(1): 0.0; S(3): 100.0; T(5): 0.0; T(9): 0.0; S(10): 0.0	182	Reverse	Class I
O15021	1	Microtubule-associated serine/threonine-protein kinase 4 OS=Homo sapiens GN=MAST4 PE=1 SV=2 - [MAST4_HUMAN]	O15021	S1212	Microtubule-associated serine/threonine-protein kinase 4 (EC 2.7.11.1)	MAST4 KIAA0303	SPTPQPTSPQRSPSP	1.02987	0.0424568	0.92173	-0.117584	2790000	2710000	5500000	6.74036	96535			TPpSPTPQPTpSPQR	2	T(1): 0.7; S(3): 99.3; T(5): 0.1; T(9): 0.1; S(10): 99.9	127	Reverse	Class I
O15021	1	Microtubule-associated serine/threonine-protein kinase 4 OS=Homo sapiens GN=MAST4 PE=1 SV=2 - [MAST4_HUMAN]	O15021	S1218	Microtubule-associated serine/threonine-protein kinase 4 (EC 2.7.11.1)	MAST4 KIAA0303	TSPQRSPSPLLGHSL	1.07643	0.106249	0.963402	-0.0537909	13600000	12700000	26300000	7.41996	52105			SPpSPLLGHSLGNSK	1	S(1): 0.3; S(3): 99.7; S(9): 0.0; S(13): 0.0	228	Reverse	Class I
O15021	1	Microtubule-associated serine/threonine-protein kinase 4 OS=Homo sapiens GN=MAST4 PE=1 SV=2 - [MAST4_HUMAN]	O15021	S1240	Microtubule-associated serine/threonine-protein kinase 4 (EC 2.7.11.1)	MAST4 KIAA0303	AFPSKMHSPPTIVRH	1.23153	0.300448	1.10222	0.140408	97800000	79400000	177200000	8.24846	59759			MHpSPPTIVR	1	S(3): 100.0; T(6): 0.0	97	Reverse	Class I
O15021	1	Microtubule-associated serine/threonine-protein kinase 4 OS=Homo sapiens GN=MAST4 PE=1 SV=2 - [MAST4_HUMAN]	O15021	S1288	Microtubule-associated serine/threonine-protein kinase 4 (EC 2.7.11.1)	MAST4 KIAA0303	HLCSRKHSLEVTQEE	2.46914	1.30401	2.20988	1.14397	9810000	3970000	13780000	7.13925	168951			KHpSLEVTQEEVQR	1	S(3): 100.0; T(7): 0.0	130	Reverse	Class I
O15021	1	Microtubule-associated serine/threonine-protein kinase 4 OS=Homo sapiens GN=MAST4 PE=1 SV=2 - [MAST4_HUMAN]	O15021	S1344	Microtubule-associated serine/threonine-protein kinase 4 (EC 2.7.11.1)	MAST4 KIAA0303	RKVGRQESVDDLDRD	1.52207	0.606035	1.36225	0.445994	127000000	83200000	210200000	8.32263	72850			VGRQEpSVDDLDRDK	1	S(6): 100.0	321	Reverse	Class I
O15021	1	Microtubule-associated serine/threonine-protein kinase 4 OS=Homo sapiens GN=MAST4 PE=1 SV=2 - [MAST4_HUMAN]	O15021	S1515	Microtubule-associated serine/threonine-protein kinase 4 (EC 2.7.11.1)	MAST4 KIAA0303	DYLRKKMSLEDKEDN	0.893655	-0.16221	0.799821	-0.32225	3950000	4420000	8370000	6.92273	84433			KMpSLEDKEDNLCPVLKPK	1	S(3): 100.0	131	Reverse	Class I
O15021	1	Microtubule-associated serine/threonine-protein kinase 4 OS=Homo sapiens GN=MAST4 PE=1 SV=2 - [MAST4_HUMAN]	O15021	S1600	Microtubule-associated serine/threonine-protein kinase 4 (EC 2.7.11.1)	MAST4 KIAA0303	PGLVAPESPVRKSPS	1.01112	0.0159576	0.904954	-0.144083	48200000	47700000	95900000	7.98182	65996			VDSGTEKPGLVAPEpSPVRK	1	S(3): 0.0; T(5): 0.0; S(15): 100.0	200	Reverse	Class I
O15021	1	Microtubule-associated serine/threonine-protein kinase 4 OS=Homo sapiens GN=MAST4 PE=1 SV=2 - [MAST4_HUMAN]	O15021	S1643	Microtubule-associated serine/threonine-protein kinase 4 (EC 2.7.11.1)	MAST4 KIAA0303	ASKTELPSPESAQSP	0.785546	-0.348232	0.703064	-0.508273	3340000	4260000	7600000	6.88081	116032			TELPpSPESAQSPSPSGDVR	1	T(1): 0.0; S(5): 99.6; S(8): 0.4; S(11): 0.0; S(13): 0.0; S(15): 0.0	93	Reverse	Class I
O15021	1	Microtubule-associated serine/threonine-protein kinase 4 OS=Homo sapiens GN=MAST4 PE=1 SV=2 - [MAST4_HUMAN]	O15021	S1681	Microtubule-associated serine/threonine-protein kinase 4 (EC 2.7.11.1)	MAST4 KIAA0303	TTSARELSPSSLKMN	1.0989	0.136062	0.983516	-0.0239789	93800000	85300000	179100000	8.2531	115887			ELpSPSSLK	1	S(3): 100.0; S(5): 0.0; S(6): 0.0	91	Reverse	Class I
O15021	1	Microtubule-associated serine/threonine-protein kinase 4 OS=Homo sapiens GN=MAST4 PE=1 SV=2 - [MAST4_HUMAN]	O15021	S1768	Microtubule-associated serine/threonine-protein kinase 4 (EC 2.7.11.1)	MAST4 KIAA0303	CLGQNLHSPDLARPR	1.05263	0.0740006	0.942105	-0.0860398	29800000	28300000	58100000	7.76418	163505			LLTCLGQNLHpSPDLARPR	1	T(3): 0.0; S(11): 100.0	143	Reverse	Class I
O15021	1	Microtubule-associated serine/threonine-protein kinase 4 OS=Homo sapiens GN=MAST4 PE=1 SV=2 - [MAST4_HUMAN]	O15021	S2283	Microtubule-associated serine/threonine-protein kinase 4 (EC 2.7.11.1)	MAST4 KIAA0303	PEKSLSCSSSFPETR	1.55763	0.639355	1.39408	0.479314	37100000	23800000	60900000	7.78462	23526			SLSCpSSSFPETR	1	S(1): 0.0; S(3): 0.5; S(5): 99.1; S(6): 0.5; S(7): 0.0; T(11): 0.0	171	Reverse	Class I
O15021	1	Microtubule-associated serine/threonine-protein kinase 4 OS=Homo sapiens GN=MAST4 PE=1 SV=2 - [MAST4_HUMAN]	O15021	S2341	Microtubule-associated serine/threonine-protein kinase 4 (EC 2.7.11.1)	MAST4 KIAA0303	THMTKSDSLPSFRVS	1.01112	0.0159576	0.904954	-0.144083	16300000	16100000	32400000	7.51055	28239			SDpSLPSFR	1	S(1): 0.0; S(3): 100.0; S(6): 0.0	68	Reverse	Class I
O15021	1	Microtubule-associated serine/threonine-protein kinase 4 OS=Homo sapiens GN=MAST4 PE=1 SV=2 - [MAST4_HUMAN]	O15021	S793	Microtubule-associated serine/threonine-protein kinase 4 (EC 2.7.11.1)	MAST4 KIAA0303	ESNRHKLSSGLLPKL	1.29534	0.373327	1.15933	0.213287	1540000	1190000	2730000	6.43616	84108			HKLpSSGLLPK	1	S(4): 98.8; S(5): 1.2	78	Reverse	Class I
O15021	1	Microtubule-associated serine/threonine-protein kinase 4 OS=Homo sapiens GN=MAST4 PE=1 SV=2 - [MAST4_HUMAN]	O15021	S84	Microtubule-associated serine/threonine-protein kinase 4 (EC 2.7.11.1)	MAST4 KIAA0303	QDSPRNFSPSASAHF	1.0846	0.117161	0.970716	-0.0428791	1200000	1110000	2310000	6.36361	146179			NFpSPSASAHFSFAR	1	S(3): 100.0; S(5): 0.0; S(7): 0.0; S(11): 0.0	102	Reverse	Class I
O15021	1	Microtubule-associated serine/threonine-protein kinase 4 OS=Homo sapiens GN=MAST4 PE=1 SV=2 - [MAST4_HUMAN]	O15021	S88	Microtubule-associated serine/threonine-protein kinase 4 (EC 2.7.11.1)	MAST4 KIAA0303	RNFSPSASAHFSFAR	0.972763	-0.0398403	0.870623	-0.199881	2380000	2450000	4830000	6.68395	52830			NFSPSApSAHFSFAR	1	S(3): 0.0; S(5): 0.0; S(7): 100.0; S(11): 0.0	285	Reverse	Class I
O15027	1	Protein transport protein Sec16A OS=Homo sapiens GN=SEC16A PE=1 SV=3 - [SC16A_HUMAN]	O15027	S1127	Protein transport protein Sec16A (SEC16 homolog A)	SEC16A KIAA0310 SEC16 SEC16L	DAYRREHSAFGDRPE	2.65252	1.40736	2.37401	1.24732	1280000	483000	1763000	6.24625	168491			EHpSAFGDRPEK	1	S(3): 100.0	76	Reverse	Class I
O15027	1	Protein transport protein Sec16A OS=Homo sapiens GN=SEC16A PE=1 SV=3 - [SC16A_HUMAN]	O15027	S1178	Protein transport protein Sec16A (SEC16 homolog A)	SEC16A KIAA0310 SEC16 SEC16L	HSEHSARSLHSAHSL	1.27714	0.352916	1.14304	0.192875	2130000	1670000	3800000	6.57978	168545			pSLHSAHSLASR	1	S(1): 100.0; S(4): 0.0; S(7): 0.0; S(10): 0.0	139	Reverse	Class I
O15027	1	Protein transport protein Sec16A OS=Homo sapiens GN=SEC16A PE=1 SV=3 - [SC16A_HUMAN]	O15027	S136	Protein transport protein Sec16A (SEC16 homolog A)	SEC16A KIAA0310 SEC16 SEC16L	RIVNHWASPELRQNP	1.13636	0.184425	1.01705	0.0243842	10300000	9100000	19400000	7.2878	145480			IVNHWApSPELR	1	S(7): 100.0	153	Reverse	Class I
O15027	1	Protein transport protein Sec16A OS=Homo sapiens GN=SEC16A PE=1 SV=3 - [SC16A_HUMAN]	O15027	S153	Protein transport protein Sec16A (SEC16 homolog A)	SEC16A KIAA0310 SEC16 SEC16L	KNEHRPASALVNPLA	1.27551	0.351074	1.14158	0.191034	827000	649000	1476000	6.16909	84672			NEHRPApSALVNPLAR	1	S(7): 100.0	156	Reverse	Class I
O15027	1	Protein transport protein Sec16A OS=Homo sapiens GN=SEC16A PE=1 SV=3 - [SC16A_HUMAN]	O15027	S1786	Protein transport protein Sec16A (SEC16 homolog A)	SEC16A KIAA0310 SEC16 SEC16L	LPDGPLASPARVPMF	1.13636	0.184425	1.01705	0.0243842	90600000	79700000	170300000	8.23121	29578			LLPSAPQTLPDGPLApSPAR	1	S(4): 0.0; T(8): 0.0; S(16): 100.0	69	Reverse	Class I
O15027	1	Protein transport protein Sec16A OS=Homo sapiens GN=SEC16A PE=1 SV=3 - [SC16A_HUMAN]	O15027	S1903	Protein transport protein Sec16A (SEC16 homolog A)	SEC16A KIAA0310 SEC16 SEC16L	GPTQPPLSLSPAPET	1.36612	0.450084	1.22268	0.290044	45600000	33400000	79000000	7.89763	23977			ADSGPTQPPLpSLSPAPETK	1	S(3): 0.0; T(6): 0.0; S(11): 99.1; S(13): 0.9; T(18): 0.0	145	Reverse	Class I
O15027	1	Protein transport protein Sec16A OS=Homo sapiens GN=SEC16A PE=1 SV=3 - [SC16A_HUMAN]	O15027	S1905	Protein transport protein Sec16A (SEC16 homolog A)	SEC16A KIAA0310 SEC16 SEC16L	TQPPLSLSPAPETKR	1.15607	0.209228	1.03468	0.0491875	129000000	112000000	241000000	8.38202	24146			ADSGPTQPPLSLpSPAPETK	1	S(3): 0.0; T(6): 0.0; S(11): 0.0; S(13): 100.0; T(18): 0.0	263	Reverse	Class I
O15027	1	Protein transport protein Sec16A OS=Homo sapiens GN=SEC16A PE=1 SV=3 - [SC16A_HUMAN]	O15027	S391	Protein transport protein Sec16A (SEC16 homolog A)	SEC16A KIAA0310 SEC16 SEC16L	FFKQIDSSPVGGETD	1.05597	0.0785637	0.94509	-0.0814767	34200000	32400000	66600000	7.82347	115982	STE/STE11	MAP3K3	QIDSpSPVGGETDETTVSQNYR	1	S(4): 0.7; S(5): 99.3; T(11): 0.0; T(14): 0.0; T(15): 0.0; S(17): 0.0; Y(20): 0.0	126	Reverse	Class I
O15027	1	Protein transport protein Sec16A OS=Homo sapiens GN=SEC16A PE=1 SV=3 - [SC16A_HUMAN]	O15027	S417	Protein transport protein Sec16A (SEC16 homolog A)	SEC16A KIAA0310 SEC16 SEC16L	VSQPSTPSPPKPTGI	1.24224	0.312939	1.1118	0.152899	31100000	25000000	56100000	7.74896	42153			GSVSQPSTPpSPPKPTGIFQTSANSSFEPVK	1	S(2): 0.0; S(4): 0.0; S(7): 0.0; T(8): 1.1; S(10): 93.4; T(15): 1.1; T(20): 1.1; S(21): 1.1; S(24): 1.1; S(25): 1.1	126	Reverse	Class I
O15027	1	Protein transport protein Sec16A OS=Homo sapiens GN=SEC16A PE=1 SV=3 - [SC16A_HUMAN]	O15027	S891	Protein transport protein Sec16A (SEC16 homolog A)	SEC16A KIAA0310 SEC16 SEC16L	VPPQQQASPPQLPKA	1.02881	0.0409718	0.920782	-0.119069	217000000	211000000	428000000	8.63144	24162			AQQELVPPQQQApSPPQLPK	1	S(13): 100.0	170	Reverse	Class I
O15027	1	Protein transport protein Sec16A OS=Homo sapiens GN=SEC16A PE=1 SV=3 - [SC16A_HUMAN]	O15027	T1876	Protein transport protein Sec16A (SEC16 homolog A)	SEC16A KIAA0310 SEC16 SEC16L	DGKFANLTPSRTVPD	0.953289	-0.0690147	0.853194	-0.229055	18900000	19900000	38800000	7.58883	23262			FANLpTPSR	1	T(5): 100.0; S(7): 0.0	78	Reverse	Class I
O15027	1	Protein transport protein Sec16A OS=Homo sapiens GN=SEC16A PE=1 SV=3 - [SC16A_HUMAN]	O15027	Y1161	Protein transport protein Sec16A (SEC16 homolog A)	SEC16A KIAA0310 SEC16 SEC16L	PDPHRDPYGEEVDRR	1.66945	0.739372	1.49416	0.579332	6330000	3790000	10120000	7.00518	86730			FTGSFDDDPDPHRDPpYGEEVDRR	1	T(2): 13.7; S(4): 2.7; Y(16): 83.7	17	Reverse	Class I
O15042	1	U2-associated protein SR140 OS=Homo sapiens GN=SR140 PE=1 SV=2 - [SR140_HUMAN]	O15042	S485	U2 snRNP-associated SURP motif-containing protein (140 kDa Ser/Arg-rich domain protein) (U2-associated protein SR140)	U2SURP KIAA0332 SR140	YSILQGDSPTKWRTE	1.20919	0.274041	1.08222	0.114	57200000	47300000	104500000	8.01912	29058			LYSILQGDpSPTK	1	Y(2): 0.0; S(3): 0.0; S(9): 99.9; T(11): 0.1	151	Reverse	Class I
O15042	1	U2-associated protein SR140 OS=Homo sapiens GN=SR140 PE=1 SV=2 - [SR140_HUMAN]	O15042	S67	U2 snRNP-associated SURP motif-containing protein (140 kDa Ser/Arg-rich domain protein) (U2-associated protein SR140)	U2SURP KIAA0332 SR140	ARESLCDSPHQNLSR	1.13379	0.181149	1.01474	0.021109	29900000	26400000	56300000	7.75051	66290			ESLCDpSPHQNLSRPLLENK	1	S(2): 0.0; S(6): 100.0; S(12): 0.0	146	Reverse	Class I
O15056	1	Synaptojanin-2 OS=Homo sapiens GN=SYNJ2 PE=1 SV=3 - [SYNJ2_HUMAN]	O15056	S1124	Synaptojanin-2 (EC 3.1.3.36) (Synaptic inositol 1,4,5-trisphosphate 5-phosphatase 2)	SYNJ2 KIAA0348	LMVKKSASDASISSG	1.37174	0.456009	1.22771	0.295969	13000000	9490000	22490000	7.35199	162990			KSApSDASISSGTHGQYSILQTAR	1	S(2): 1.0; S(4): 97.1; S(7): 1.0; S(9): 0.0; S(10): 1.0; T(12): 0.0; Y(16): 0.0; S(17): 0.0; T(21): 0.0	190	Reverse	Class I
O15056	1	Synaptojanin-2 OS=Homo sapiens GN=SYNJ2 PE=1 SV=3 - [SYNJ2_HUMAN]	O15056	S1127	Synaptojanin-2 (EC 3.1.3.36) (Synaptic inositol 1,4,5-trisphosphate 5-phosphatase 2)	SYNJ2 KIAA0348	KKSASDASISSGTHG	1.34048	0.422752	1.19973	0.262712	11600000	8660000	20260000	7.30664	148554			KSASDApSISSGTHGQYSILQTAR	1	S(2): 1.2; S(4): 1.2; S(7): 94.1; S(9): 1.2; S(10): 1.2; T(12): 1.2; Y(16): 0.0; S(17): 0.0; T(21): 0.0	118	Reverse	Class I
O15061	1	Desmuslin OS=Homo sapiens GN=DMN PE=1 SV=2 - [DMN_HUMAN]	O15061	S1044	Synemin (Desmuslin)	SYNM DMN KIAA0353 SYN	ESLSRQRSPAPGSPD	0.979432	-0.0299829	0.876592	-0.190023	3720000	3790000	7510000	6.87564	115156	CAMK/PKD	PKD1	pSPAPGSPDEEGGAEAPAAGIR	1	S(1): 93.8; S(6): 6.2	106	Reverse	Class I
O15061	1	Desmuslin OS=Homo sapiens GN=DMN PE=1 SV=2 - [DMN_HUMAN]	O15061	S429	Synemin (Desmuslin)	SYNM DMN KIAA0353 SYN	QTNVRTFSPTYGLLR	1.16279	0.217591	1.0407	0.057551	26200000	22500000	48700000	7.68753	29971	TKL/STKR	TGFbR1, TGFbR2	TFpSPTYGLLR	1	T(1): 0.0; S(3): 100.0; T(5): 0.0; Y(6): 0.0	87	Reverse	Class I
O15061	1	Desmuslin OS=Homo sapiens GN=DMN PE=1 SV=2 - [DMN_HUMAN]	O15061	T171	Synemin (Desmuslin)	SYNM DMN KIAA0353 SYN	MHFRARATGPAAPPP	0.683995	-0.547943	0.612175	-0.707984	101000	148000	249000	5.3962	112237			ARApTGPAAPPPR	1	T(4): 100.0	56	Reverse	Class I
O15061	1	Desmuslin OS=Homo sapiens GN=DMN PE=1 SV=2 - [DMN_HUMAN]	O15061	T427	Synemin (Desmuslin)	SYNM DMN KIAA0353 SYN	SSQTNVRTFSPTYGL	1.11607	0.158429	0.998884	-0.00161105	18000000	16100000	34100000	7.53275	25063			pTFSPTYGLLR	1	T(1): 99.4; S(3): 0.6; T(5): 0.0; Y(6): 0.0	160	Reverse	Class I
O15062	1	Zinc finger and BTB domain-containing protein 5 OS=Homo sapiens GN=ZBTB5 PE=1 SV=1 - [ZBTB5_HUMAN]	O15062	S234	Zinc finger and BTB domain-containing protein 5	ZBTB5 KIAA0354	HSREEFFSPDSLKIV	1.12108	0.164884	1.00336	0.00484397	4930000	4400000	9330000	6.96988	120152			EEFFpSPDSLK	1	S(5): 100.0; S(8): 0.0	100	Reverse	Class I
O15063	1	Uncharacterized protein KIAA0355 OS=Homo sapiens GN=KIAA0355 PE=2 SV=2 - [K0355_HUMAN]	O15063	S723	Uncharacterized protein KIAA0355	KIAA0355	GLAPQQQSPKQQQPQ	1.33333	0.415037	1.19333	0.254997	60600000	45400000	106000000	8.02531	51496			APQAGAHTPLTPQPGLAPQQQpSPK	1	T(8): 0.0; T(11): 0.0; S(22): 100.0	214	Reverse	Class I
O15069	1	NAC-alpha domain-containing protein 1 OS=Homo sapiens GN=NACAD PE=2 SV=2 - [NACAD_HUMAN]	O15069	S1303	NAC-alpha domain-containing protein 1	NACAD KIAA0363	RVSLSPHSPLLSPKV	1.04493	0.0634092	0.935214	-0.0966312	6730000	6440000	13170000	7.11959	55601			VSLSPHpSPLLSPK	1	S(2): 0.0; S(4): 0.0; S(7): 100.0; S(11): 0.0	230	Reverse	Class I
O15075	1	Serine/threonine-protein kinase DCLK1 OS=Homo sapiens GN=DCLK1 PE=1 SV=2 - [DCLK1_HUMAN]	O15075	S172	Serine/threonine-protein kinase DCLK1 (EC 2.7.11.1) (Doublecortin domain-containing protein 3A) (Doublecortin-like and CAM kinase-like 1) (Doublecortin-like kinase 1)	DCLK1 DCAMKL1 DCDC3A KIAA0369	SLATAKGSPSEVREN	0.819001	-0.288063	0.733006	-0.448104	3080000	3770000	6850000	6.83569	162095			AVSSLATAKGpSPSEVRENK	1	S(3): 0.0; S(4): 0.0; T(7): 0.0; S(11): 99.4; S(13): 0.5	93	Reverse	Class I
O15075	1	Serine/threonine-protein kinase DCLK1 OS=Homo sapiens GN=DCLK1 PE=1 SV=2 - [DCLK1_HUMAN]	O15075	S307	Serine/threonine-protein kinase DCLK1 (EC 2.7.11.1) (Doublecortin domain-containing protein 3A) (Doublecortin-like and CAM kinase-like 1) (Doublecortin-like kinase 1)	DCLK1 DCAMKL1 DCDC3A KIAA0369	GPSRRSKSPASTSSV	1.02987	0.0424568	0.92173	-0.117584	935000	908000	1843000	6.26553	130032	CAMK/CAMK2	CaMK2g	SKpSPASTSSVNGTPGSQLSTPR	1	S(1): 0.8; S(3): 96.2; S(6): 0.8; T(7): 0.8; S(8): 0.8; S(9): 0.8; T(13): 0.0; S(16): 0.0; S(19): 0.0; T(20): 0.0	217	Reverse	Class I
O15075	1	Serine/threonine-protein kinase DCLK1 OS=Homo sapiens GN=DCLK1 PE=1 SV=2 - [DCLK1_HUMAN]	O15075	S330	Serine/threonine-protein kinase DCLK1 (EC 2.7.11.1) (Doublecortin domain-containing protein 3A) (Doublecortin-like and CAM kinase-like 1) (Doublecortin-like kinase 1)	DCLK1 DCAMKL1 DCDC3A KIAA0369	STPRSGKSPSPSPTS	0.594177	-0.751035	0.531788	-0.911076	708000	1190000	1898000	6.2783	37188	Other/PLK	PLK1	SGKpSPpSPSPTpSPGSLRK	3	S(1): 0.1; S(4): 99.9; S(6): 96.1; S(8): 3.9; T(10): 3.9; S(11): 95.8; S(14): 0.3	77	Reverse	Class I
O15075	1	Serine/threonine-protein kinase DCLK1 OS=Homo sapiens GN=DCLK1 PE=1 SV=2 - [DCLK1_HUMAN]	O15075	S332	Serine/threonine-protein kinase DCLK1 (EC 2.7.11.1) (Doublecortin domain-containing protein 3A) (Doublecortin-like and CAM kinase-like 1) (Doublecortin-like kinase 1)	DCLK1 DCAMKL1 DCDC3A KIAA0369	PRSGKSPSPSPTSPG	0.594177	-0.751035	0.531788	-0.911076	708000	1190000	1898000	6.2783	37188	Other/PLK	PLK1	SGKpSPpSPSPTpSPGSLRK	3	S(1): 0.1; S(4): 99.9; S(6): 96.1; S(8): 3.9; T(10): 3.9; S(11): 95.8; S(14): 0.3	77	Reverse	Class I
O15075	1	Serine/threonine-protein kinase DCLK1 OS=Homo sapiens GN=DCLK1 PE=1 SV=2 - [DCLK1_HUMAN]	O15075	S337	Serine/threonine-protein kinase DCLK1 (EC 2.7.11.1) (Doublecortin domain-containing protein 3A) (Doublecortin-like and CAM kinase-like 1) (Doublecortin-like kinase 1)	DCLK1 DCAMKL1 DCDC3A KIAA0369	SPSPSPTSPGSLRKQ	0.594177	-0.751035	0.531788	-0.911076	708000	1190000	1898000	6.2783	37188			SGKpSPpSPSPTpSPGSLRK	3	S(1): 0.1; S(4): 99.9; S(6): 96.1; S(8): 3.9; T(10): 3.9; S(11): 95.8; S(14): 0.3	77	Reverse	Class I
O15084	1	Ankyrin repeat domain-containing protein 28 OS=Homo sapiens GN=ANKRD28 PE=1 SV=4 - [ANR28_HUMAN]	O15084	S1044	Serine/threonine-protein phosphatase 6 regulatory ankyrin repeat subunit A (PP6-ARS-A) (Serine/threonine-protein phosphatase 6 regulatory subunit ARS-A) (Ankyrin repeat domain-containing protein 28) (Phosphatase interactor targeting protein hnRNP K) (PITK)	ANKRD28 KIAA0379	TNTSKTVSFEALPIM	1.0917	0.12658	0.977074	-0.0334599	18900000	17300000	36200000	7.55871	29669	CMGC/GSK	GSK3A	TVpSFEALPIMR	1	T(1): 0.0; S(3): 100.0	82	Reverse	Class I
O15084	1	Ankyrin repeat domain-containing protein 28 OS=Homo sapiens GN=ANKRD28 PE=1 SV=4 - [ANR28_HUMAN]	O15084	T1042	Serine/threonine-protein phosphatase 6 regulatory ankyrin repeat subunit A (PP6-ARS-A) (Serine/threonine-protein phosphatase 6 regulatory subunit ARS-A) (Ankyrin repeat domain-containing protein 28) (Phosphatase interactor targeting protein hnRNP K) (PITK)	ANKRD28 KIAA0379	RYTNTSKTVSFEALP	1.04932	0.0694519	0.93914	-0.0905885	17100000	16300000	33400000	7.52375	25176			pTVSFEALPIMR	1	T(1): 99.8; S(3): 0.2	108	Reverse	Class I
O15085	1	Rho guanine nucleotide exchange factor 11 OS=Homo sapiens GN=ARHGEF11 PE=1 SV=1 - [ARHGB_HUMAN]	O15085	S1295	Rho guanine nucleotide exchange factor 11 (PDZ-RhoGEF)	ARHGEF11 KIAA0380	LPPRTRNSGIWESPE	1.21951	0.286304	1.09146	0.126264	19600000	16100000	35700000	7.55267	146006			TRNpSGIWESPELDR	1	T(1): 0.0; S(4): 100.0; S(9): 0.0	242	Reverse	Class I
O15085	1	Rho guanine nucleotide exchange factor 11 OS=Homo sapiens GN=ARHGEF11 PE=1 SV=1 - [ARHGB_HUMAN]	O15085	S1480	Rho guanine nucleotide exchange factor 11 (PDZ-RhoGEF)	ARHGEF11 KIAA0380	RWTDGSLSPPAKEPL	0.819672	-0.286881	0.733607	-0.446922	20800000	25400000	46200000	7.66464	125236			WTDGSLpSPPAKEPLASDSR	1	T(2): 0.0; S(5): 0.0; S(7): 100.0; S(16): 0.0; S(18): 0.0	155	Reverse	Class I
O15085	1	Rho guanine nucleotide exchange factor 11 OS=Homo sapiens GN=ARHGEF11 PE=1 SV=1 - [ARHGB_HUMAN]	O15085	S556	Rho guanine nucleotide exchange factor 11 (PDZ-RhoGEF)	ARHGEF11 KIAA0380	STFHIPLSPVEVKPG	1.29366	0.37146	1.15783	0.211419	12100000	9330000	21430000	7.33102	163568			SSSQSTFHIPLpSPVEVKPGNVR	1	S(1): 0.0; S(2): 0.0; S(3): 0.0; S(5): 0.0; T(6): 0.0; S(12): 100.0	245	Reverse	Class I
O15085	1	Rho guanine nucleotide exchange factor 11 OS=Homo sapiens GN=ARHGEF11 PE=1 SV=1 - [ARHGB_HUMAN]	O15085	S614	Rho guanine nucleotide exchange factor 11 (PDZ-RhoGEF)	ARHGEF11 KIAA0380	IRLGRSESLKGREEM	0.909091	-0.137504	0.813636	-0.297544	21100000	23200000	44300000	7.6464	72280			SEpSLKGREEMK	1	S(1): 0.0; S(3): 100.0	209	Reverse	Class I
O15085	1	Rho guanine nucleotide exchange factor 11 OS=Homo sapiens GN=ARHGEF11 PE=1 SV=1 - [ARHGB_HUMAN]	O15085	T1292	Rho guanine nucleotide exchange factor 11 (PDZ-RhoGEF)	ARHGEF11 KIAA0380	LEHLPPRTRNSGIWE	1.17371	0.231075	1.05047	0.0710343	13400000	11400000	24800000	7.39445	145842			pTRNSGIWESPELDR	1	T(1): 99.1; S(4): 0.9; S(9): 0.0	138	Reverse	Class I
O15085	1	Rho guanine nucleotide exchange factor 11 OS=Homo sapiens GN=ARHGEF11 PE=1 SV=1 - [ARHGB_HUMAN]	O15085	T668	Rho guanine nucleotide exchange factor 11 (PDZ-RhoGEF)	ARHGEF11 KIAA0380	TRSLENPTPPFTPKM	0.974659	-0.0370307	0.87232	-0.197071	10600000	10900000	21500000	7.33244	28505			SLENPpTPPFTPK	1	S(1): 0.0; T(6): 97.3; T(10): 2.7	83	Reverse	Class I
O15085	1	Rho guanine nucleotide exchange factor 11 OS=Homo sapiens GN=ARHGEF11 PE=1 SV=1 - [ARHGB_HUMAN]	O15085	T672	Rho guanine nucleotide exchange factor 11 (PDZ-RhoGEF)	ARHGEF11 KIAA0380	ENPTPPFTPKMGRRS	1.60256	0.680382	1.43429	0.520342	5690000	3550000	9240000	6.96567	110418			SLENPTPPFpTPK	1	S(1): 0.0; T(6): 0.7; T(10): 99.3	58	Reverse	Class I
O15116	1	U6 snRNA-associated Sm-like protein LSm1 OS=Homo sapiens GN=LSM1 PE=1 SV=1 - [LSM1_HUMAN]	O15116	S123	U6 snRNA-associated Sm-like protein LSm1 (Cancer-associated Sm-like) (Small nuclear ribonuclear CaSm)	LSM1 CASM	ALKDRGLSIPRADTL	0.909091	-0.137504	0.813636	-0.297544	81800000	89900000	171700000	8.23477	27327			GLpSIPR	1	S(3): 100.0	93	Reverse	Class I
O15123	1	Angiopoietin-2 OS=Homo sapiens GN=ANGPT2 PE=1 SV=1 - [ANGP2_HUMAN]	O15123	S25	Angiopoietin-2 (ANG-2)	ANGPT2	AYNNFRKSMDSIGKK	1.47059	0.556393	1.31618	0.396353	33400000	22700000	56100000	7.74896	18224			pSMDSIGK	1	S(1): 99.1; S(4): 0.9	42	Reverse	Class I
O15127	1	Secretory carrier-associated membrane protein 2 OS=Homo sapiens GN=SCAMP2 PE=1 SV=2 - [SCAM2_HUMAN]	O15127	S319	Secretory carrier-associated membrane protein 2 (Secretory carrier membrane protein 2)	SCAMP2	RTFHRAASSAAQGAF	1.03413	0.0484122	0.925543	-0.111628	72700000	70300000	143000000	8.15534	95552			AApSSAAQGAFQGN	1	S(3): 99.2; S(4): 0.8	164	Reverse	Class I
O15143	1	Actin-related protein 2/3 complex subunit 1B OS=Homo sapiens GN=ARPC1B PE=1 SV=3 - [ARC1B_HUMAN]	O15143	S310	Actin-related protein 2/3 complex subunit 1B (Arp2/3 complex 41 kDa subunit) (p41-ARC)	ARPC1B ARC41	QNLDKKASSEGGTAA	0.99108	-0.0129262	0.887017	-0.172967	17200000	17300000	34500000	7.53782	68581	STE/STE20	HGK, PAK1	KApSSEGGTAAGAGLDSLHK	1	S(3): 100.0; S(4): 0.0; T(8): 0.0; S(16): 0.0	255	Reverse	Class I
O15155	1	BET1 homolog OS=Homo sapiens GN=BET1 PE=1 SV=1 - [BET1_HUMAN]	O15155	S48	BET1 homolog (hBET1) (Golgi vesicular membrane-trafficking protein p18)	BET1	SKVTAIKSLSIEIGH	2.09644	1.06794	1.87631	0.907898	31700000	15100000	46800000	7.67025	55391			pSLSIEIGHEVK	1	S(1): 99.8; S(3): 0.2	108	Reverse	Class I
O15155	1	BET1 homolog OS=Homo sapiens GN=BET1 PE=1 SV=1 - [BET1_HUMAN]	O15155	S50	BET1 homolog (hBET1) (Golgi vesicular membrane-trafficking protein p18)	BET1	VTAIKSLSIEIGHEV	1.93424	0.951764	1.73114	0.791723	14600000	7550000	22150000	7.34537	55685			SLpSIEIGHEVK	1	S(1): 0.0; S(3): 100.0	331	Reverse	Class I
O15164	1	Transcription intermediary factor 1-alpha OS=Homo sapiens GN=TRIM24 PE=1 SV=3 - [TIF1A_HUMAN]	O15164	S1025	Transcription intermediary factor 1-alpha (TIF1-alpha) (EC 6.3.2.-) (E3 ubiquitin-protein ligase TRIM24) (RING finger protein 82) (Tripartite motif-containing protein 24)	TRIM24 RNF82 TIF1 TIF1A	ESEDNKFSDDSDDDF	1.27389	0.349235	1.14013	0.189195	78400000	61600000	140000000	8.14613	28035			NESEDNKFpSDDpSDDDFVQPR	2	S(3): 0.1; S(9): 99.9; S(12): 100.0	64	Reverse	Class I
O15164	1	Transcription intermediary factor 1-alpha OS=Homo sapiens GN=TRIM24 PE=1 SV=3 - [TIF1A_HUMAN]	O15164	S1028	Transcription intermediary factor 1-alpha (TIF1-alpha) (EC 6.3.2.-) (E3 ubiquitin-protein ligase TRIM24) (RING finger protein 82) (Tripartite motif-containing protein 24)	TRIM24 RNF82 TIF1 TIF1A	DNKFSDDSDDDFVQP	1.27389	0.349235	1.14013	0.189195	78400000	61600000	140000000	8.14613	28035			NESEDNKFpSDDpSDDDFVQPR	2	S(3): 0.1; S(9): 99.9; S(12): 100.0	64	Reverse	Class I
O15164	1	Transcription intermediary factor 1-alpha OS=Homo sapiens GN=TRIM24 PE=1 SV=3 - [TIF1A_HUMAN]	O15164	S811	Transcription intermediary factor 1-alpha (TIF1-alpha) (EC 6.3.2.-) (E3 ubiquitin-protein ligase TRIM24) (RING finger protein 82) (Tripartite motif-containing protein 24)	TRIM24 RNF82 TIF1 TIF1A	WLDPSQKSPLHVGET	0.880282	-0.183963	0.787852	-0.344003	5120000	5820000	10940000	7.03902	64202	Atypical/PIKK/FRAP	FRAP	SEWLDPSQKpSPLHVGETR	1	S(1): 0.0; S(7): 0.1; S(10): 99.9; T(17): 0.0	163	Reverse	Class I
O15169	1	Axin-1 OS=Homo sapiens GN=AXIN1 PE=1 SV=2 - [AXN1_HUMAN]	O15169	S217	Axin-1 (Axis inhibition protein 1) (hAxin)	AXIN1 AXIN	YTRTGSESPKVCSDQ	0.853242	-0.228973	0.763652	-0.389013	4770000	5590000	10360000	7.01536	46497	CMGC/DYRK	HIPK2	TGSEpSPKVCSDQSSGSGTGK	1	T(1): 0.0; S(3): 0.0; S(5): 100.0; S(10): 0.0; S(13): 0.0; S(14): 0.0; S(16): 0.0; T(18): 0.0	211	Reverse	Class I
O15169	1	Axin-1 OS=Homo sapiens GN=AXIN1 PE=1 SV=2 - [AXN1_HUMAN]	O15169	S77	Axin-1 (Axis inhibition protein 1) (hAxin)	AXIN1 AXIN	YEPEGSASPTPPYLK	5.20833	2.38082	4.66146	2.22078	1190000	228000	1418000	6.15168	132428	CMGC/DYRK	HIPK2	RSDLDLGYEPEGSApSPTPPYLK	1	S(2): 0.0; Y(8): 0.0; S(13): 0.0; S(15): 100.0; T(17): 0.0; Y(20): 0.0	242	Reverse	Class I
O15173	1	Membrane-associated progesterone receptor component 2 OS=Homo sapiens GN=PGRMC2 PE=1 SV=1 - [PGRC2_HUMAN]	O15173	S104	Membrane-associated progesterone receptor component 2 (Progesterone membrane-binding protein) (Steroid receptor protein DG6)	PGRMC2 DG6 PMBP	RMKKRDFSLEQLRQY	1.52905	0.612637	1.3685	0.452597	4730000	3090000	7820000	6.89321	86960			KRDFpSLEQLR	1	S(5): 100.0	230	Reverse	Class I
O15173	1	Membrane-associated progesterone receptor component 2 OS=Homo sapiens GN=PGRMC2 PE=1 SV=1 - [PGRC2_HUMAN]	O15173	S208	Membrane-associated progesterone receptor component 2 (Progesterone membrane-binding protein) (Steroid receptor protein DG6)	PGRMC2 DG6 PMBP	LKPGEEPSEYTDEED	1.05374	0.07552	0.943098	-0.0845204	6390000	6070000	12460000	7.09552	154605			LLKPGEEPpSEYTDEEDTKDHNK	1	S(9): 79.2; Y(11): 9.8; T(12): 9.8; T(17): 1.3	70	Reverse	Class I
O15173	1	Membrane-associated progesterone receptor component 2 OS=Homo sapiens GN=PGRMC2 PE=1 SV=1 - [PGRC2_HUMAN]	O15173	T211	Membrane-associated progesterone receptor component 2 (Progesterone membrane-binding protein) (Steroid receptor protein DG6)	PGRMC2 DG6 PMBP	GEEPSEYTDEEDTKD	1.23305	0.302226	1.10358	0.142186	2920000000	2370000000	5290000000	9.72346	51401			LLKPGEEPSEYpTDEEDTK	1	S(9): 0.0; Y(11): 0.0; T(12): 100.0; T(17): 0.0	263	Reverse	Class I
O15173	1	Membrane-associated progesterone receptor component 2 OS=Homo sapiens GN=PGRMC2 PE=1 SV=1 - [PGRC2_HUMAN]	O15173	T216	Membrane-associated progesterone receptor component 2 (Progesterone membrane-binding protein) (Steroid receptor protein DG6)	PGRMC2 DG6 PMBP	EYTDEEDTKDHNKQD	1.05597	0.0785637	0.94509	-0.0814767	107000000	101000000	208000000	8.31806	86430			LLKPGEEPSEYTDEEDpTKDHNKQD	1	S(9): 0.9; Y(11): 0.9; T(12): 0.9; T(17): 97.3	115	Reverse	Class I
O15173	1	Membrane-associated progesterone receptor component 2 OS=Homo sapiens GN=PGRMC2 PE=1 SV=1 - [PGRC2_HUMAN]	O15173	Y210	Membrane-associated progesterone receptor component 2 (Progesterone membrane-binding protein) (Steroid receptor protein DG6)	PGRMC2 DG6 PMBP	PGEEPSEYTDEEDTK	1.11483	0.15682	0.99777	-0.0032203	2100000000	1880000000	3980000000	9.59988	78596			LLKPGEEPSEpYTDEEDTKDHNKQD	1	S(9): 0.6; Y(11): 89.3; T(12): 9.8; T(17): 0.2	45	Reverse	Class I
O15211	1	Ral guanine nucleotide dissociation stimulator-like 2 OS=Homo sapiens GN=RGL2 PE=1 SV=1 - [RGL2_HUMAN]	O15211	S13	Ral guanine nucleotide dissociation stimulator-like 2 (RalGDS-like 2) (RalGDS-like factor) (Ras-associated protein RAB2L)	RGL2 RAB2L	LRLLLDTSPPGGVVL	1.11483	0.15682	0.99777	-0.0032203	23000000	20600000	43600000	7.63949	120961			LLLDTpSPPGGVVLSSFR	1	T(5): 0.8; S(6): 99.2; S(14): 0.0; S(15): 0.0	98	Reverse	Class I
O15211	1	Ral guanine nucleotide dissociation stimulator-like 2 OS=Homo sapiens GN=RGL2 PE=1 SV=1 - [RGL2_HUMAN]	O15211	S409	Ral guanine nucleotide dissociation stimulator-like 2 (RalGDS-like 2) (RalGDS-like factor) (Ras-associated protein RAB2L)	RGL2 RAB2L	VQEVKLQSPLEPHSK	1.221	0.288065	1.0928	0.128024	11100000	9110000	20210000	7.30557	133909			LQpSPLEPHSK	1	S(3): 100.0; S(9): 0.0	159	Reverse	Class I
O15213	1	WD repeat-containing protein 46 OS=Homo sapiens GN=WDR46 PE=1 SV=2 - [WDR46_HUMAN]	O15213	S41	WD repeat-containing protein 46 (WD repeat-containing protein BING4)	WDR46 BING4 C6orf11 FP221	VPTTAGASPGPPRNK	1.12613	0.171368	1.00788	0.011328	6000000	5330000	11330000	7.05423	145472			RYWEEETVPTTAGApSPGPPR	1	Y(2): 0.0; T(7): 0.0; T(10): 0.0; T(11): 0.0; S(15): 100.0	201	Reverse	Class I
O15231	1	Zinc finger protein 185 OS=Homo sapiens GN=ZNF185 PE=1 SV=2 - [ZN185_HUMAN]	O15231	S17	Zinc finger protein 185 (LIM domain protein ZNF185) (P1-A)	ZNF185	APYNIRRSSTSGDTE	1.46413	0.550043	1.3104	0.390002	223000000	153000000	376000000	8.57519	125348			RpSSTSGDTEEEEEEEVVPFSSDEQK	1	S(2): 97.7; S(3): 0.8; T(4): 0.8; S(5): 0.8; T(8): 0.0; S(20): 0.0; S(21): 0.0	349	Reverse	Class I
O15231	1	Zinc finger protein 185 OS=Homo sapiens GN=ZNF185 PE=1 SV=2 - [ZN185_HUMAN]	O15231	S221	Zinc finger protein 185 (LIM domain protein ZNF185) (P1-A)	ZNF185	STPERQSSPSGSEQL	1.17371	0.231075	1.05047	0.0710343	130000000	111000000	241000000	8.38202	114063			QSpSPSGSEQLVR	1	S(2): 0.2; S(3): 99.6; S(5): 0.2; S(7): 0.0	117	Reverse	Class I
O15231	1	Zinc finger protein 185 OS=Homo sapiens GN=ZNF185 PE=1 SV=2 - [ZN185_HUMAN]	O15231	S233	Zinc finger protein 185 (LIM domain protein ZNF185) (P1-A)	ZNF185	EQLVRRESCGSSVLT	1.52207	0.606035	1.36225	0.445994	98200000	64500000	162700000	8.21139	55984			REpSCGSSVLTDFEGK	1	S(3): 100.0; S(6): 0.0; S(7): 0.0; T(10): 0.0	298	Reverse	Class I
O15231	1	Zinc finger protein 185 OS=Homo sapiens GN=ZNF185 PE=1 SV=2 - [ZN185_HUMAN]	O15231	S71	Zinc finger protein 185 (LIM domain protein ZNF185) (P1-A)	ZNF185	AAKKSTGSPTQETQA	1.03734	0.0528949	0.928423	-0.107145	150000000	145000000	295000000	8.46982	117236			STGpSPTQETQAPFIAK	1	S(1): 0.5; T(2): 6.3; S(4): 92.7; T(6): 0.5; T(9): 0.0	104	Reverse	Class I
O15231	1	Zinc finger protein 185 OS=Homo sapiens GN=ZNF185 PE=1 SV=2 - [ZN185_HUMAN]	O15231	T23	Zinc finger protein 185 (LIM domain protein ZNF185) (P1-A)	ZNF185	RSSTSGDTEEEEEEE	0.721501	-0.470927	0.645743	-0.630968	35900000	49700000	85600000	7.93247	15100			SSTSGDpTEEEEEEEVVPFSSDEQK	1	S(1): 0.9; S(2): 0.9; T(3): 0.9; S(4): 0.0; T(7): 97.2; S(19): 0.0; S(20): 0.0	282	Reverse	Class I
O15231	1	Zinc finger protein 185 OS=Homo sapiens GN=ZNF185 PE=1 SV=2 - [ZN185_HUMAN]	O15231	T73	Zinc finger protein 185 (LIM domain protein ZNF185) (P1-A)	ZNF185	KKSTGSPTQETQAPF	1.3089	0.388355	1.17147	0.228315	8750000	6690000	15440000	7.18865	130977			KSTGSPpTQETQAPFIAK	1	S(2): 0.0; T(3): 0.0; S(5): 0.0; T(7): 100.0; T(10): 0.0	274	Reverse	Class I
O15231	1	Zinc finger protein 185 OS=Homo sapiens GN=ZNF185 PE=1 SV=2 - [ZN185_HUMAN]	O15231	T76	Zinc finger protein 185 (LIM domain protein ZNF185) (P1-A)	ZNF185	TGSPTQETQAPFIAK	1.3089	0.388355	1.17147	0.228315	8750000	6690000	15440000	7.18865	130977			KSTGSPTQEpTQAPFIAK	1	S(2): 0.4; T(3): 0.4; S(5): 12.9; T(7): 2.2; T(10): 84.0	54	Reverse	Class I
O15234	1	Protein CASC3 OS=Homo sapiens GN=CASC3 PE=1 SV=2 - [CASC3_HUMAN]	O15234	S148	Protein CASC3 (Cancer susceptibility candidate gene 3 protein) (Metastatic lymph node gene 51 protein) (MLN 51) (Protein barentsz) (Btz)	CASC3 MLN51	TVTGERQSGDGQEST	1.0929	0.128156	0.978142	-0.0318841	193000000	177000000	370000000	8.5682	127047			STVTGERQpSGDGQESTEPVENK	1	S(1): 0.0; T(2): 0.0; T(4): 0.0; S(9): 100.0; S(15): 0.0; T(16): 0.0	272	Reverse	Class I
O15234	1	Protein CASC3 OS=Homo sapiens GN=CASC3 PE=1 SV=2 - [CASC3_HUMAN]	O15234	S265	Protein CASC3 (Cancer susceptibility candidate gene 3 protein) (Metastatic lymph node gene 51 protein) (MLN 51) (Protein barentsz) (Btz)	CASC3 MLN51	IRKPRYGSPPQRDPN	1.06496	0.0908029	0.953142	-0.0692375	84900000	79700000	164600000	8.21643	144707			YGpSPPQRDPNWNGER	1	Y(1): 0.0; S(3): 100.0	228	Reverse	Class I
O15234	1	Protein CASC3 OS=Homo sapiens GN=CASC3 PE=1 SV=2 - [CASC3_HUMAN]	O15234	S363	Protein CASC3 (Cancer susceptibility candidate gene 3 protein) (Metastatic lymph node gene 51 protein) (MLN 51) (Protein barentsz) (Btz)	CASC3 MLN51	QTSVRDPSPEADAPV	1.19332	0.254978	1.06802	0.0949374	7620000	6380000	14000000	7.14613	148295			RLEQTSVRDPpSPEADAPVLGSPEK	1	T(5): 0.0; S(6): 0.0; S(11): 100.0; S(21): 0.0	140	Reverse	Class I
O15234	1	Protein CASC3 OS=Homo sapiens GN=CASC3 PE=1 SV=2 - [CASC3_HUMAN]	O15234	Y263	Protein CASC3 (Cancer susceptibility candidate gene 3 protein) (Metastatic lymph node gene 51 protein) (MLN 51) (Protein barentsz) (Btz)	CASC3 MLN51	RRIRKPRYGSPPQRD	1.06496	0.0908029	0.953142	-0.0692375	84900000	79700000	164600000	8.21643	144707			pYGSPPQRDPNWNGER	1	Y(1): 100.0; S(3): 0.0	182	Reverse	Class I
O15258	1	Protein RER1 OS=Homo sapiens GN=RER1 PE=2 SV=1 - [RER1_HUMAN]	O15258	S90	Protein RER1	RER1	LSPKVDPSLMEDSDD	1.10375	0.142417	0.987859	-0.0176234	13600000	12400000	26000000	7.41497	117265			VDPpSLMEDSDDGPSLPTK	1	S(4): 92.4; S(9): 7.6; S(14): 0.0; T(17): 0.0	59	Reverse	Class I
O15320	1	Cutaneous T-cell lymphoma-associated antigen 5 OS=Homo sapiens GN=CTAGE5 PE=1 SV=2 - [CTGE5_HUMAN]	O15320	S137	Cutaneous T-cell lymphoma-associated antigen 5 (Protein cTAGE-5) (Meningioma-expressed antigen 6/11) (cTAGE family member 5)	CTAGE5 MEA11 MEA6 MGEA11 MGEA6	TCEKLNRSNSELEDE	0.935454	-0.0962619	0.837231	-0.256302	750000	802000	1552000	6.19089	132709			LNRpSNSELEDEILCLEK	1	S(4): 99.9; S(6): 0.1	133	Reverse	Class I
O15320	1	Cutaneous T-cell lymphoma-associated antigen 5 OS=Homo sapiens GN=CTAGE5 PE=1 SV=2 - [CTGE5_HUMAN]	O15320	S139	Cutaneous T-cell lymphoma-associated antigen 5 (Protein cTAGE-5) (Meningioma-expressed antigen 6/11) (cTAGE family member 5)	CTAGE5 MEA11 MEA6 MGEA11 MGEA6	EKLNRSNSELEDEIL	0.977517	-0.0328061	0.874878	-0.192847	1960000	2000000	3960000	6.5977	102073			SNpSELEDEILCLEK	1	S(1): 0.1; S(3): 99.9	165	Reverse	Class I
O15320	1	Cutaneous T-cell lymphoma-associated antigen 5 OS=Homo sapiens GN=CTAGE5 PE=1 SV=2 - [CTGE5_HUMAN]	O15320	S522	Cutaneous T-cell lymphoma-associated antigen 5 (Protein cTAGE-5) (Meningioma-expressed antigen 6/11) (cTAGE family member 5)	CTAGE5 MEA11 MEA6 MGEA11 MGEA6	EHSPYGPSPLGWPSS	0.887311	-0.172488	0.794144	-0.332528	5630000	6350000	11980000	7.07846	146130	CMGC	MOK	EHSPYGPpSPLGWPSSETR	1	S(3): 0.0; Y(5): 0.1; S(8): 99.9; S(14): 0.0; S(15): 0.0; T(17): 0.0	123	Reverse	Class I
O15320	1	Cutaneous T-cell lymphoma-associated antigen 5 OS=Homo sapiens GN=CTAGE5 PE=1 SV=2 - [CTGE5_HUMAN]	O15320	S536	Cutaneous T-cell lymphoma-associated antigen 5 (Protein cTAGE-5) (Meningioma-expressed antigen 6/11) (cTAGE family member 5)	CTAGE5 MEA11 MEA6 MGEA11 MGEA6	SETRAFLSPPTLLEG	1.14286	0.192645	1.02286	0.0326047	240000000	210000000	450000000	8.65321	121236	CMGC	MOK	AFLpSPPTLLEGPLR	1	S(4): 100.0; T(7): 0.0	145	Reverse	Class I
O15320	1	Cutaneous T-cell lymphoma-associated antigen 5 OS=Homo sapiens GN=CTAGE5 PE=1 SV=2 - [CTGE5_HUMAN]	O15320	S635	Cutaneous T-cell lymphoma-associated antigen 5 (Protein cTAGE-5) (Meningioma-expressed antigen 6/11) (cTAGE family member 5)	CTAGE5 MEA11 MEA6 MGEA11 MGEA6	CSNSGRLSGPAELRS	0.943396	-0.0840643	0.84434	-0.244105	165000000	175000000	340000000	8.53148	60856			FCSNSGRLpSGPAELR	1	S(3): 0.0; S(5): 0.0; S(9): 100.0	303	Reverse	Class I
O15320;Q96RT6	2	Cutaneous T-cell lymphoma-associated antigen 5 OS=Homo sapiens GN=CTAGE5 PE=1 SV=2 - [CTGE5_HUMAN]|Protein cTAGE-2 OS=Homo sapiens GN=CTAGE1 PE=2 SV=1 - [CTGE2_HUMAN]	O15320	S647	Cutaneous T-cell lymphoma-associated antigen 5 (Protein cTAGE-5) (Meningioma-expressed antigen 6/11) (cTAGE family member 5)	CTAGE5 MEA11 MEA6 MGEA11 MGEA6	LRSFNMPSLDKMDGS	0.947867	-0.077243	0.848341	-0.237283	13200000	13900000	27100000	7.43297	24676			SFNMPpSLDK	1	S(1): 0.0; S(6): 100.0	72	Reverse	Class I	Q96RT6	S616	Protein cTAGE-2 (Cancer/testis antigen 21.2) (CT21.2)	CTAGE1 CTAGE2
O15344	1	Midline-1 OS=Homo sapiens GN=MID1 PE=1 SV=1 - [TRI18_HUMAN]	O15344	S92	Midline-1 (EC 6.3.2.-) (Midin) (Midline 1 RING finger protein) (Putative transcription factor XPRF) (RING finger protein 59) (Tripartite motif-containing protein 18)	MID1 FXY RNF59 TRIM18 XPRF	RFQKASVSGPNSPSE	0.85034	-0.233888	0.761054	-0.393928	2930000	3440000	6370000	6.80414	35039			ASVpSGPNpSPSETRR	2	S(2): 0.0; S(4): 100.0; S(8): 99.6; S(10): 0.4; T(12): 0.0	197	Reverse	Class I
O15344	1	Midline-1 OS=Homo sapiens GN=MID1 PE=1 SV=1 - [TRI18_HUMAN]	O15344	S96	Midline-1 (EC 6.3.2.-) (Midin) (Midline 1 RING finger protein) (Putative transcription factor XPRF) (RING finger protein 59) (Tripartite motif-containing protein 18)	MID1 FXY RNF59 TRIM18 XPRF	ASVSGPNSPSETRRE	0.85034	-0.233888	0.761054	-0.393928	2930000	3440000	6370000	6.80414	35039	STE/STE-Unique/NIK	NIK	ASVpSGPNpSPSETRR	2	S(2): 0.0; S(4): 100.0; S(8): 99.6; S(10): 0.4; T(12): 0.0	197	Reverse	Class I
O15344	1	Midline-1 OS=Homo sapiens GN=MID1 PE=1 SV=1 - [TRI18_HUMAN]	O15344	S98	Midline-1 (EC 6.3.2.-) (Midin) (Midline 1 RING finger protein) (Putative transcription factor XPRF) (RING finger protein 59) (Tripartite motif-containing protein 18)	MID1 FXY RNF59 TRIM18 XPRF	VSGPNSPSETRRERA	1.16686	0.222633	1.04434	0.0625925	6310000	5410000	11720000	7.06893	143460			ASVSGPNSPpSETRR	1	S(2): 0.0; S(4): 0.0; S(8): 0.7; S(10): 98.6; T(12): 0.7	87	Reverse	Class I
O15357	1	Phosphatidylinositol-3,4,5-trisphosphate 5-phosphatase 2 OS=Homo sapiens GN=INPPL1 PE=1 SV=1 - [SHIP2_HUMAN]	O15357	S240	Phosphatidylinositol 3,4,5-trisphosphate 5-phosphatase 2 (EC 3.1.3.86) (Inositol polyphosphate phosphatase-like protein 1) (INPPL-1) (Protein 51C) (SH2 domain-containing inositol 5'-phosphatase 2) (SH2 domain-containing inositol phosphatase 2) (SHIP-2)	INPPL1 SHIP2	SKVFDQQSSPMVTRL	1.14416	0.194295	1.02403	0.0342544	49600000	43300000	92900000	7.96802	26353			VFDQQpSSPMVTR	1	S(6): 96.0; S(7): 4.0; T(11): 0.0	116	Reverse	Class I
O15357	1	Phosphatidylinositol-3,4,5-trisphosphate 5-phosphatase 2 OS=Homo sapiens GN=INPPL1 PE=1 SV=1 - [SHIP2_HUMAN]	O15357	S241	Phosphatidylinositol 3,4,5-trisphosphate 5-phosphatase 2 (EC 3.1.3.86) (Inositol polyphosphate phosphatase-like protein 1) (INPPL-1) (Protein 51C) (SH2 domain-containing inositol 5'-phosphatase 2) (SH2 domain-containing inositol phosphatase 2) (SHIP-2)	INPPL1 SHIP2	KVFDQQSSPMVTRLL	1.08932	0.123434	0.974946	-0.0366065	8170000	7490000	15660000	7.19479	23350	CMGC/GSK	GSK3A	VFDQQSpSPMVTR	1	S(6): 5.1; S(7): 94.9; T(11): 0.0	198	Reverse	Class I
O15372	1	Eukaryotic translation initiation factor 3 subunit H OS=Homo sapiens GN=EIF3H PE=1 SV=1 - [EIF3H_HUMAN]	O15372	S183	Eukaryotic translation initiation factor 3 subunit H (eIF3h) (Eukaryotic translation initiation factor 3 subunit 3) (eIF-3-gamma) (eIF3 p40 subunit)	EIF3H EIF3S3	VCKEKDFSPEALKKA	0.91659	-0.125651	0.820348	-0.285692	15800000	17300000	33100000	7.51983	51903			DFpSPEALKK	1	S(3): 100.0	117	Reverse	Class I
O15400	1	Syntaxin-7 OS=Homo sapiens GN=STX7 PE=1 SV=4 - [STX7_HUMAN]	O15400	S126	Syntaxin-7	STX7	VARVRASSRVSGSFP	1.33333	0.415037	1.19333	0.254997	2030000	1520000	3550000	6.55023	134172	AGC/AKT	AKT1	ASpSRVSGSFPEDSSK	1	S(2): 1.1; S(3): 98.9; S(6): 0.0; S(8): 0.0; S(13): 0.0; S(14): 0.0	141	Reverse	Class I
O15400	1	Syntaxin-7 OS=Homo sapiens GN=STX7 PE=1 SV=4 - [STX7_HUMAN]	O15400	S129	Syntaxin-7	STX7	VRASSRVSGSFPEDS	1.28041	0.356606	1.14597	0.196565	131000000	103000000	234000000	8.36922	134193			ASSRVpSGSFPEDSSK	1	S(2): 0.0; S(3): 0.0; S(6): 100.0; S(8): 0.0; S(13): 0.0; S(14): 0.0	254	Reverse	Class I
O15400	1	Syntaxin-7 OS=Homo sapiens GN=STX7 PE=1 SV=4 - [STX7_HUMAN]	O15400	S45	Syntaxin-7	STX7	QLGTPQDSPELRQQL	1.0352	0.0499049	0.926501	-0.110136	15300000	14800000	30100000	7.47857	117200			TLNQLGTPQDpSPELR	1	T(1): 0.0; T(7): 0.0; S(11): 100.0	152	Reverse	Class I
O15400	1	Syntaxin-7 OS=Homo sapiens GN=STX7 PE=1 SV=4 - [STX7_HUMAN]	O15400	T78	Syntaxin-7	STX7	KEFGSLPTTPSEQRQ	1.00604	0.00868224	0.900402	-0.151358	171000000	170000000	341000000	8.53275	117215			EFGSLPpTTPSEQR	1	S(4): 0.0; T(7): 95.6; T(8): 4.2; S(10): 0.2	106	Reverse	Class I
O15400	1	Syntaxin-7 OS=Homo sapiens GN=STX7 PE=1 SV=4 - [STX7_HUMAN]	O15400	T79	Syntaxin-7	STX7	EFGSLPTTPSEQRQR	1.00604	0.00868224	0.900402	-0.151358	171000000	170000000	341000000	8.53275	117215	CMGC/MAPK	Erk1	EFGSLPTpTPSEQR	1	S(4): 0.0; T(7): 4.2; T(8): 91.5; S(10): 4.2	104	Reverse	Class I
O15417	1	Trinucleotide repeat-containing gene 18 protein OS=Homo sapiens GN=TNRC18 PE=1 SV=3 - [TNC18_HUMAN]	O15417	S1127	Trinucleotide repeat-containing gene 18 protein (Long CAG trinucleotide repeat-containing gene 79 protein)	TNRC18 CAGL79 KIAA1856	GPERLALSPEDKPIR	1.13895	0.187707	1.01936	0.0276667	10300000	9040000	19340000	7.28646	136051			LALpSPEDKPIRLpSPSK	2	S(4): 100.0; S(13): 99.5; S(15): 0.5	122	Reverse	Class I
O15417	1	Trinucleotide repeat-containing gene 18 protein OS=Homo sapiens GN=TNRC18 PE=1 SV=3 - [TNC18_HUMAN]	O15417	S1136	Trinucleotide repeat-containing gene 18 protein (Long CAG trinucleotide repeat-containing gene 79 protein)	TNRC18 CAGL79 KIAA1856	EDKPIRLSPSKITEP	1.30548	0.384584	1.16841	0.224543	4440000	3400000	7840000	6.89432	66794			LALSPEDKPIRLpSPSK	1	S(4): 0.0; S(13): 100.0; S(15): 0.0	247	Reverse	Class I
O15417	1	Trinucleotide repeat-containing gene 18 protein OS=Homo sapiens GN=TNRC18 PE=1 SV=3 - [TNC18_HUMAN]	O15417	S1857	Trinucleotide repeat-containing gene 18 protein (Long CAG trinucleotide repeat-containing gene 79 protein)	TNRC18 CAGL79 KIAA1856	GARERALSPGLEESG	1.09409	0.129734	0.979212	-0.0303065	13400000	12300000	25700000	7.40993	120779			ALpSPGLEESGLGLLAR	1	S(3): 100.0; S(9): 0.0	164	Reverse	Class I
O15417	1	Trinucleotide repeat-containing gene 18 protein OS=Homo sapiens GN=TNRC18 PE=1 SV=3 - [TNC18_HUMAN]	O15417	S1989	Trinucleotide repeat-containing gene 18 protein (Long CAG trinucleotide repeat-containing gene 79 protein)	TNRC18 CAGL79 KIAA1856	FEAGPEASDDDLWTR	0.754717	-0.405992	0.675472	-0.566033	939000	1240000	2179000	6.33826	79774			LRGPKEPGFEAGPEApSDDDLWTR	1	S(16): 100.0; T(22): 0.0	160	Reverse	Class I
O15417	1	Trinucleotide repeat-containing gene 18 protein OS=Homo sapiens GN=TNRC18 PE=1 SV=3 - [TNC18_HUMAN]	O15417	S263	Trinucleotide repeat-containing gene 18 protein (Long CAG trinucleotide repeat-containing gene 79 protein)	TNRC18 CAGL79 KIAA1856	PRLAERLSPFLAESK	0.984252	-0.0229004	0.880906	-0.182941	9870000	10000000	19870000	7.2982	56129			LAERLpSPFLAESK	1	S(6): 100.0; S(12): 0.0	324	Reverse	Class I
O15417	1	Trinucleotide repeat-containing gene 18 protein OS=Homo sapiens GN=TNRC18 PE=1 SV=3 - [TNC18_HUMAN]	O15417	S991	Trinucleotide repeat-containing gene 18 protein (Long CAG trinucleotide repeat-containing gene 79 protein)	TNRC18 CAGL79 KIAA1856	GTYGKAVSPPPSPRA	1.17509	0.232769	1.0517	0.0727286	2230000	1900000	4130000	6.61595	97661			AVpSPPPpSPR	2	S(3): 100.0; S(7): 100.0	77	Reverse	Class I
O15417	1	Trinucleotide repeat-containing gene 18 protein OS=Homo sapiens GN=TNRC18 PE=1 SV=3 - [TNC18_HUMAN]	O15417	S995	Trinucleotide repeat-containing gene 18 protein (Long CAG trinucleotide repeat-containing gene 79 protein)	TNRC18 CAGL79 KIAA1856	KAVSPPPSPRASPVA	1.17509	0.232769	1.0517	0.0727286	2230000	1900000	4130000	6.61595	97661			AVpSPPPpSPR	2	S(3): 100.0; S(7): 100.0	77	Reverse	Class I
O15417	1	Trinucleotide repeat-containing gene 18 protein OS=Homo sapiens GN=TNRC18 PE=1 SV=3 - [TNC18_HUMAN]	O15417	S999	Trinucleotide repeat-containing gene 18 protein (Long CAG trinucleotide repeat-containing gene 79 protein)	TNRC18 CAGL79 KIAA1856	PPPSPRASPVAALKA	0.591716	-0.757023	0.529586	-0.917064	874000	1480000	2354000	6.37181	98201			AVpSPPPpSPRApSPVAALK	3	S(3): 100.0; S(7): 100.0; S(11): 100.0	154	Reverse	Class I
O15417	1	Trinucleotide repeat-containing gene 18 protein OS=Homo sapiens GN=TNRC18 PE=1 SV=3 - [TNC18_HUMAN]	O15417	T2146	Trinucleotide repeat-containing gene 18 protein (Long CAG trinucleotide repeat-containing gene 79 protein)	TNRC18 CAGL79 KIAA1856	GAVERPLTPAPRSCI	0.794281	-0.332278	0.710882	-0.492319	4610000	5810000	10420000	7.01787	133905			GGAVERPLpTPAPR	1	T(9): 100.0	121	Reverse	Class I
O15427	1	Monocarboxylate transporter 4 OS=Homo sapiens GN=SLC16A3 PE=1 SV=1 - [MOT4_HUMAN]	O15427	S464	Monocarboxylate transporter 4 (MCT 4) (Solute carrier family 16 member 3)	SLC16A3 MCT4	VVHTPETSV******	1.05152	0.0724828	0.941115	-0.0875577	73400000	69800000	143200000	8.15594	26858	TKL/RAF	RAF1	NGEVVHTPETpSV	1	T(7): 0.0; T(10): 0.4; S(11): 99.6	94	Reverse	Class I
O15439	1	Multidrug resistance-associated protein 4 OS=Homo sapiens GN=ABCC4 PE=1 SV=3 - [MRP4_HUMAN]	O15439	S404	Multidrug resistance-associated protein 4 (ATP-binding cassette sub-family C member 4) (MRP/cMOAT-related ABC transporter) (Multi-specific organic anion transporter B) (MOAT-B)	ABCC4 MRP4	QRNRQLPSDGKKMVH	1.18906	0.249822	1.06421	0.0897819	28300000	23800000	52100000	7.71684	133285			QLPpSDGKK	1	S(4): 100.0	96	Reverse	Class I
O15439	1	Multidrug resistance-associated protein 4 OS=Homo sapiens GN=ABCC4 PE=1 SV=3 - [MRP4_HUMAN]	O15439	T646	Multidrug resistance-associated protein 4 (ATP-binding cassette sub-family C member 4) (MRP/cMOAT-related ABC transporter) (Multi-specific organic anion transporter B) (MOAT-B)	ABCC4 MRP4	EQPPVPGTPTLRNRT	0.961538	-0.0565835	0.860577	-0.216624	105000000	109000000	214000000	8.33041	60756	CAMK/MAPKAPK	MAPKAPK3	KDNEESEQPPVPGpTPTLR	1	S(6): 0.0; T(14): 100.0; T(16): 0.0	284	Reverse	Class I
O15439	1	Multidrug resistance-associated protein 4 OS=Homo sapiens GN=ABCC4 PE=1 SV=3 - [MRP4_HUMAN]	O15439	T648	Multidrug resistance-associated protein 4 (ATP-binding cassette sub-family C member 4) (MRP/cMOAT-related ABC transporter) (Multi-specific organic anion transporter B) (MOAT-B)	ABCC4 MRP4	PPVPGTPTLRNRTFS	0.979432	-0.0299829	0.876592	-0.190023	63400000	64700000	128100000	8.10755	27580			DNEESEQPPVPGTPpTLR	1	S(5): 0.0; T(13): 4.8; T(15): 95.2	45	Reverse	Class I
O15523	1	ATP-dependent RNA helicase DDX3Y OS=Homo sapiens GN=DDX3Y PE=1 SV=2 - [DDX3Y_HUMAN]	O15523	S592	ATP-dependent RNA helicase DDX3Y (EC 3.6.4.13) (DEAD box protein 3, Y-chromosomal)	DDX3Y DBY	RSKSNRFSGGFGARD	0.915751	-0.126973	0.819597	-0.287013	3280000	3590000	6870000	6.83696	65916	AGC/PKA	PRKY	SNRFpSGGFGAR	1	S(1): 0.0; S(5): 100.0	110	Reverse	Class I
O15530	1	3-phosphoinositide-dependent protein kinase 1 OS=Homo sapiens GN=PDPK1 PE=1 SV=1 - [PDPK1_HUMAN]	O15530	S241	3-phosphoinositide-dependent protein kinase 1 (hPDK1) (EC 2.7.11.1)	PDPK1 PDK1	SKQARANSFVGTAQY	1.13766	0.186065	1.0182	0.0260245	472000000	415000000	887000000	8.94792	21000	AGC/PKB	PDK1	ANpSFVGTAQYVSPELLTEK	1	S(3): 91.2; T(7): 8.7; Y(10): 0.1; S(12): 0.0; T(17): 0.0	75	Reverse	Class I
O15530	1	3-phosphoinositide-dependent protein kinase 1 OS=Homo sapiens GN=PDPK1 PE=1 SV=1 - [PDPK1_HUMAN]	O15530	T245	3-phosphoinositide-dependent protein kinase 1 (hPDK1) (EC 2.7.11.1)	PDPK1 PDK1	RANSFVGTAQYVSPE	1.13766	0.186065	1.0182	0.0260245	472000000	415000000	887000000	8.94792	21000	TKL/IRAK	IRAK4	ANSFVGpTAQYVSPELLTEK	1	S(3): 6.0; T(7): 94.0; Y(10): 0.0; S(12): 0.0; T(17): 0.0	106	Reverse	Class I
O15530	1	3-phosphoinositide-dependent protein kinase 1 OS=Homo sapiens GN=PDPK1 PE=1 SV=1 - [PDPK1_HUMAN]	O15530	T513	3-phosphoinositide-dependent protein kinase 1 (hPDK1) (EC 2.7.11.1)	PDPK1 PDK1	PEAKNFKTFFVHTPN	0.99108	-0.0129262	0.887017	-0.172967	142000	143000	285000	5.45484	82721			NFKpTFFVHTPNR	1	T(4): 100.0; T(9): 0.0	189	Reverse	Class I
O15534	1	Period circadian protein homolog 1 OS=Homo sapiens GN=PER1 PE=1 SV=1 - [PER1_HUMAN]	O15534	S815	Period circadian protein homolog 1 (hPER1) (Circadian clock protein PERIOD 1) (Circadian pacemaker protein Rigui)	PER1 KIAA0482 PER RIGUI	DSSSTAPSALGERGC	1.04932	0.0694519	0.93914	-0.0905885	22800000	21700000	44500000	7.64836	27085	CAMK/CAMK1	CaMK4	GLDSSSTAPpSALGER	1	S(4): 0.0; S(5): 0.0; S(6): 0.0; T(7): 0.0; S(10): 100.0	169	Reverse	Class I
O15541	1	RING finger protein 113A OS=Homo sapiens GN=RNF113A PE=1 SV=1 - [R113A_HUMAN]	O15541	S253	RING finger protein 113A (Zinc finger protein 183)	RNF113A RNF113 ZNF183	DENYEVGSDDEEIPF	1.43266	0.518701	1.28223	0.358661	98600000	68800000	167400000	8.22376	30078			YGVYEDENYEVGpSDDEEIPFK	1	Y(1): 0.0; Y(4): 0.0; Y(9): 0.0; S(13): 100.0	102	Reverse	Class I
O15541	1	RING finger protein 113A OS=Homo sapiens GN=RNF113A PE=1 SV=1 - [R113A_HUMAN]	O15541	S84	RING finger protein 113A (Zinc finger protein 183)	RNF113A RNF113 ZNF183	KAAYGDLSSEEEEEN	1.5625	0.643856	1.39844	0.483816	5440000	3480000	8920000	6.95036	96180			AAYGDLpSpSEEEEENEPESLGVVYK	2	Y(3): 0.0; S(7): 100.0; S(8): 100.0; S(18): 0.0; Y(23): 0.0	251	Reverse	Class I
O15541	1	RING finger protein 113A OS=Homo sapiens GN=RNF113A PE=1 SV=1 - [R113A_HUMAN]	O15541	S85	RING finger protein 113A (Zinc finger protein 183)	RNF113A RNF113 ZNF183	AAYGDLSSEEEEENE	1.5625	0.643856	1.39844	0.483816	5440000	3480000	8920000	6.95036	96180			AAYGDLpSpSEEEEENEPESLGVVYK	2	Y(3): 0.0; S(7): 100.0; S(8): 100.0; S(18): 0.0; Y(23): 0.0	251	Reverse	Class I
O15550	1	Histone demethylase UTX OS=Homo sapiens GN=UTX PE=1 SV=2 - [UTX_HUMAN]	O15550	S818	Lysine-specific demethylase 6A (EC 1.14.11.-) (Histone demethylase UTX) (Ubiquitously-transcribed TPR protein on the X chromosome) (Ubiquitously-transcribed X chromosome tetratricopeptide repeat protein)	KDM6A UTX	TDNSVASSPSSAIST	0.993049	-0.0100637	0.888779	-0.170104	5490000	5530000	11020000	7.04218	96918	Other/IKK	IKKa	TDNSVASpSPSSAISTATPpSPK	2	T(1): 0.0; S(4): 0.0; S(7): 7.6; S(8): 84.8; S(10): 7.6; S(11): 0.1; S(14): 0.0; T(15): 0.0; T(17): 0.1; S(19): 99.9	76	Reverse	Class I
O15550	1	Histone demethylase UTX OS=Homo sapiens GN=UTX PE=1 SV=2 - [UTX_HUMAN]	O15550	S829	Lysine-specific demethylase 6A (EC 1.14.11.-) (Histone demethylase UTX) (Ubiquitously-transcribed TPR protein on the X chromosome) (Ubiquitously-transcribed X chromosome tetratricopeptide repeat protein)	KDM6A UTX	AISTATPSPKSTEQT	0.993049	-0.0100637	0.888779	-0.170104	5490000	5530000	11020000	7.04218	96918	Other/IKK	IKKa	TDNSVASpSPSSAISTATPpSPK	2	T(1): 0.0; S(4): 0.0; S(7): 7.6; S(8): 84.8; S(10): 7.6; S(11): 0.1; S(14): 0.0; T(15): 0.0; T(17): 0.1; S(19): 99.9	76	Reverse	Class I
O43149	1	Zinc finger ZZ-type and EF-hand domain-containing protein 1 OS=Homo sapiens GN=ZZEF1 PE=1 SV=5 - [ZZEF1_HUMAN]	O43149	S1464	Zinc finger ZZ-type and EF-hand domain-containing protein 1	ZZEF1 KIAA0399	NKRQRTSSVVEEHFQ	1.88324	0.913216	1.6855	0.753176	50300000	26700000	77000000	7.88649	41772			TSpSVVEEHFQASVSPTEAAPPATGDQSPGLGTQPK	1	T(1): 1.4; S(2): 1.4; S(3): 97.2; S(12): 0.0; S(14): 0.0; T(16): 0.0; T(23): 0.0; S(27): 0.0; T(32): 0.0	328	Reverse	Class I
O43149	1	Zinc finger ZZ-type and EF-hand domain-containing protein 1 OS=Homo sapiens GN=ZZEF1 PE=1 SV=5 - [ZZEF1_HUMAN]	O43149	S240	Zinc finger ZZ-type and EF-hand domain-containing protein 1	ZZEF1 KIAA0399	SPGDLTRSPEMDKLK	1.00402	0.00578235	0.898594	-0.154258	2880000	2870000	5750000	6.75967	150409			EKESPGDLTRpSPEMDK	1	S(4): 0.0; T(9): 0.0; S(11): 100.0	122	Reverse	Class I
O43150	1	Development and differentiation-enhancing factor 2 OS=Homo sapiens GN=DDEF2 PE=1 SV=3 - [DDEF2_HUMAN]	O43150	S701	Arf-GAP with SH3 domain, ANK repeat and PH domain-containing protein 2 (Development and differentiation-enhancing factor 2) (Paxillin-associated protein with ARF GAP activity 3) (PAG3) (Pyk2 C-terminus-associated protein) (PAP)	ASAP2 DDEF2 KIAA0400	LHEDLDESDDDMDEK	1.14811	0.199255	1.02755	0.039215	249000000	216000000	465000000	8.66745	54613			LLHEDLDEpSDDDMDEK	1	S(9): 100.0	508	Reverse	Class I
O43150	1	Development and differentiation-enhancing factor 2 OS=Homo sapiens GN=DDEF2 PE=1 SV=3 - [DDEF2_HUMAN]	O43150	S822	Arf-GAP with SH3 domain, ANK repeat and PH domain-containing protein 2 (Development and differentiation-enhancing factor 2) (Paxillin-associated protein with ARF GAP activity 3) (PAG3) (Pyk2 C-terminus-associated protein) (PAP)	ASAP2 DDEF2 KIAA0400	GSRQRSSSDPPAVHP	1.23916	0.309359	1.10905	0.149319	22500000	18100000	40600000	7.60853	55906			SSpSDPPAVHPPLPPLR	1	S(1): 7.8; S(2): 7.8; S(3): 84.3	154	Reverse	Class I
O43159	1	Cerebral protein 1 OS=Homo sapiens GN=KIAA0409 PE=1 SV=2 - [HUCE1_HUMAN]	O43159	S104	Ribosomal RNA-processing protein 8 (EC 2.1.1.-) (Cerebral protein 1) (Nucleomethylin)	RRP8 KIAA0409 NML hucep-1	QKQGPPCSDSEEEVE	0.718907	-0.476122	0.643422	-0.636163	7520000	10500000	18020000	7.25575	31320			QGPPCpSDpSEEEVERK	2	S(6): 100.0; S(8): 100.0	247	Reverse	Class I
O43159	1	Cerebral protein 1 OS=Homo sapiens GN=KIAA0409 PE=1 SV=2 - [HUCE1_HUMAN]	O43159	S106	Ribosomal RNA-processing protein 8 (EC 2.1.1.-) (Cerebral protein 1) (Nucleomethylin)	RRP8 KIAA0409 NML hucep-1	QGPPCSDSEEEVERK	0.718907	-0.476122	0.643422	-0.636163	7520000	10500000	18020000	7.25575	31320			QGPPCpSDpSEEEVERK	2	S(6): 100.0; S(8): 100.0	247	Reverse	Class I
O43159	1	Cerebral protein 1 OS=Homo sapiens GN=KIAA0409 PE=1 SV=2 - [HUCE1_HUMAN]	O43159	S126	Ribosomal RNA-processing protein 8 (EC 2.1.1.-) (Cerebral protein 1) (Nucleomethylin)	RRP8 KIAA0409 NML hucep-1	QALVGSDSAEDEKRK	0.868056	-0.204141	0.77691	-0.364181	7810000	8990000	16800000	7.22531	26306			QALVGSDpSAEDEK	1	S(6): 4.7; S(8): 95.3	101	Reverse	Class I
O43159	1	Cerebral protein 1 OS=Homo sapiens GN=KIAA0409 PE=1 SV=2 - [HUCE1_HUMAN]	O43159	S176	Ribosomal RNA-processing protein 8 (EC 2.1.1.-) (Cerebral protein 1) (Nucleomethylin)	RRP8 KIAA0409 NML hucep-1	KQSPGSTSPKPPHTL	1.24378	0.314733	1.11318	0.154692	54500000	43800000	98300000	7.99255	72522			QSPGSTpSPKPPHTLSR	1	S(2): 0.0; S(5): 0.0; T(6): 0.3; S(7): 99.7; T(13): 0.0; S(15): 0.0	252	Reverse	Class I
O43159	1	Cerebral protein 1 OS=Homo sapiens GN=KIAA0409 PE=1 SV=2 - [HUCE1_HUMAN]	O43159	S223	Ribosomal RNA-processing protein 8 (EC 2.1.1.-) (Cerebral protein 1) (Nucleomethylin)	RRP8 KIAA0409 NML hucep-1	PTEKTEVSPVPRTDS	1.21803	0.284546	1.09013	0.124505	28400000	23300000	51700000	7.71349	113804			TEVpSPVPR	1	T(1): 0.2; S(4): 99.8	65	Reverse	Class I
O43159	1	Cerebral protein 1 OS=Homo sapiens GN=KIAA0409 PE=1 SV=2 - [HUCE1_HUMAN]	O43159	T220	Ribosomal RNA-processing protein 8 (EC 2.1.1.-) (Cerebral protein 1) (Nucleomethylin)	RRP8 KIAA0409 NML hucep-1	AEAPTEKTEVSPVPR	1.20337	0.26708	1.07702	0.107039	11700000	9720000	21420000	7.33082	22426			pTEVSPVPR	1	T(1): 99.2; S(4): 0.8	51	Reverse	Class I
O43164	1	E3 ubiquitin-protein ligase Praja2 OS=Homo sapiens GN=PJA2 PE=1 SV=3 - [PJA2_HUMAN]	O43164	S309	E3 ubiquitin-protein ligase Praja-2 (Praja2) (EC 6.3.2.-) (RING finger protein 131)	PJA2 KIAA0438 RNF131	REKNHGSSPEQVVRP	1.16822	0.224317	1.04556	0.0642769	26800000	22900000	49700000	7.69636	168673			NHGSpSPEQVVRPK	1	S(4): 0.1; S(5): 99.9	119	Reverse	Class I
O43166	1	Signal-induced proliferation-associated 1-like protein 1 OS=Homo sapiens GN=SIPA1L1 PE=1 SV=4 - [SI1L1_HUMAN]	O43166	S1181	Signal-induced proliferation-associated 1-like protein 1 (SIPA1-like protein 1) (High-risk human papilloma viruses E6 oncoproteins targeted protein 1) (E6-targeted protein 1)	SIPA1L1 E6TP1 KIAA0440	GFGVSRRSPASIDRQ	1.13636	0.184425	1.01705	0.0243842	17000000	15000000	32000000	7.50515	73357			SMPEGFGVSRRpSPASIDR	1	S(1): 0.0; S(9): 0.0; S(12): 100.0; S(15): 0.0	225	Reverse	Class I
O43166	1	Signal-induced proliferation-associated 1-like protein 1 OS=Homo sapiens GN=SIPA1L1 PE=1 SV=4 - [SI1L1_HUMAN]	O43166	S1255	Signal-induced proliferation-associated 1-like protein 1 (SIPA1-like protein 1) (High-risk human papilloma viruses E6 oncoproteins targeted protein 1) (E6-targeted protein 1)	SIPA1L1 E6TP1 KIAA0440	VLPAFRESPSGRLMR	0.761615	-0.392867	0.681645	-0.552907	2480000	3250000	5730000	6.75815	135751			VLPAFREpSPSGR	1	S(8): 99.0; S(10): 1.0	94	Reverse	Class I
O43166	1	Signal-induced proliferation-associated 1-like protein 1 OS=Homo sapiens GN=SIPA1L1 PE=1 SV=4 - [SI1L1_HUMAN]	O43166	S1366	Signal-induced proliferation-associated 1-like protein 1 (SIPA1-like protein 1) (High-risk human papilloma viruses E6 oncoproteins targeted protein 1) (E6-targeted protein 1)	SIPA1L1 E6TP1 KIAA0440	VAPLWHSSSEVISMA	0.94518	-0.0813396	0.845936	-0.24138	1610000	1700000	3310000	6.51983	55980			VAPLWHSpSSEVISMADR	1	S(7): 0.0; S(8): 96.0; S(9): 4.0; S(13): 0.0	305	Reverse	Class I
O43166	1	Signal-induced proliferation-associated 1-like protein 1 OS=Homo sapiens GN=SIPA1L1 PE=1 SV=4 - [SI1L1_HUMAN]	O43166	S1433	Signal-induced proliferation-associated 1-like protein 1 (SIPA1-like protein 1) (High-risk human papilloma viruses E6 oncoproteins targeted protein 1) (E6-targeted protein 1)	SIPA1L1 E6TP1 KIAA0440	MSSRHSASPVVFTSA	0.94697	-0.0786098	0.847538	-0.23865	9110000	9620000	18730000	7.27254	60244	CMGC/GSK	GSK3A	HSApSPVVFTSAR	1	S(2): 0.4; S(4): 99.6; T(9): 0.0; S(10): 0.0	230	Reverse	Class I
O43166	1	Signal-induced proliferation-associated 1-like protein 1 OS=Homo sapiens GN=SIPA1L1 PE=1 SV=4 - [SI1L1_HUMAN]	O43166	S1528	Signal-induced proliferation-associated 1-like protein 1 (SIPA1-like protein 1) (High-risk human papilloma viruses E6 oncoproteins targeted protein 1) (E6-targeted protein 1)	SIPA1L1 E6TP1 KIAA0440	STRDLRASPKPTSKS	0.968992	-0.045443	0.867248	-0.205483	61900000	63900000	125800000	8.09968	67733	CMGC/GSK	GSK3A	DLRApSPKPTSK	1	S(5): 100.0; T(9): 0.0; S(10): 0.0	209	Reverse	Class I
O43166	1	Signal-induced proliferation-associated 1-like protein 1 OS=Homo sapiens GN=SIPA1L1 PE=1 SV=4 - [SI1L1_HUMAN]	O43166	S1549	Signal-induced proliferation-associated 1-like protein 1 (SIPA1-like protein 1) (High-risk human papilloma viruses E6 oncoproteins targeted protein 1) (E6-targeted protein 1)	SIPA1L1 E6TP1 KIAA0440	KKLIDLESPTPESQK	1.1976	0.260152	1.07186	0.100111	45200000	37700000	82900000	7.91855	23970	CMGC/GSK	GSK3A	LIDLEpSPTPESQK	1	S(6): 100.0; T(8): 0.0; S(11): 0.0	155	Reverse	Class I
O43166	1	Signal-induced proliferation-associated 1-like protein 1 OS=Homo sapiens GN=SIPA1L1 PE=1 SV=4 - [SI1L1_HUMAN]	O43166	S1568	Signal-induced proliferation-associated 1-like protein 1 (SIPA1-like protein 1) (High-risk human papilloma viruses E6 oncoproteins targeted protein 1) (E6-targeted protein 1)	SIPA1L1 E6TP1 KIAA0440	HALSSPQSPFPSTPT	0.83682	-0.257011	0.748954	-0.417051	13500000	16100000	29600000	7.47129	61297	CMGC/GSK	GSK3A	FHALSSPQpSPFPSTPTSR	1	S(5): 0.0; S(6): 0.0; S(9): 100.0; S(13): 0.0; T(14): 0.0; T(16): 0.0; S(17): 0.0	272	Reverse	Class I
O43166	1	Signal-induced proliferation-associated 1-like protein 1 OS=Homo sapiens GN=SIPA1L1 PE=1 SV=4 - [SI1L1_HUMAN]	O43166	S1572	Signal-induced proliferation-associated 1-like protein 1 (SIPA1-like protein 1) (High-risk human papilloma viruses E6 oncoproteins targeted protein 1) (E6-targeted protein 1)	SIPA1L1 E6TP1 KIAA0440	SPQSPFPSTPTSRRA	0.875657	-0.191563	0.783713	-0.351603	1580000	1800000	3380000	6.52892	145767			FHALSSPQSPFPpSTPTSR	1	S(5): 0.0; S(6): 0.0; S(9): 0.0; S(13): 98.9; T(14): 1.1; T(16): 0.0; S(17): 0.0	177	Reverse	Class I
O43166	1	Signal-induced proliferation-associated 1-like protein 1 OS=Homo sapiens GN=SIPA1L1 PE=1 SV=4 - [SI1L1_HUMAN]	O43166	S1585	Signal-induced proliferation-associated 1-like protein 1 (SIPA1-like protein 1) (High-risk human papilloma viruses E6 oncoproteins targeted protein 1) (E6-targeted protein 1)	SIPA1L1 E6TP1 KIAA0440	RALHRTLSDESIYNS	1.18624	0.246395	1.06168	0.0863551	145000000	122000000	267000000	8.42651	116082	CK1	CK1d, CK1e	TLpSDESIYNSQR	1	T(1): 0.0; S(3): 100.0; S(6): 0.0; Y(8): 0.0; S(10): 0.0	91	Reverse	Class I
O43166	1	Signal-induced proliferation-associated 1-like protein 1 OS=Homo sapiens GN=SIPA1L1 PE=1 SV=4 - [SI1L1_HUMAN]	O43166	S1588	Signal-induced proliferation-associated 1-like protein 1 (SIPA1-like protein 1) (High-risk human papilloma viruses E6 oncoproteins targeted protein 1) (E6-targeted protein 1)	SIPA1L1 E6TP1 KIAA0440	HRTLSDESIYNSQRE	0.831255	-0.266637	0.743973	-0.426677	11700000	14100000	25800000	7.41162	96810	CK1	CK1d, CK1e	TLpSDEpSIYNSQR	2	T(1): 0.5; S(3): 99.5; S(6): 100.0; Y(8): 0.0; S(10): 0.0	170	Reverse	Class I
O43166	1	Signal-induced proliferation-associated 1-like protein 1 OS=Homo sapiens GN=SIPA1L1 PE=1 SV=4 - [SI1L1_HUMAN]	O43166	S162	Signal-induced proliferation-associated 1-like protein 1 (SIPA1-like protein 1) (High-risk human papilloma viruses E6 oncoproteins targeted protein 1) (E6-targeted protein 1)	SIPA1L1 E6TP1 KIAA0440	MPEAYPSSPRKALRR	0.631313	-0.663572	0.565025	-0.823613	6350000	10100000	16450000	7.21617	52735	CMGC/GSK	GSK3A	FLMPEAYPSpSPRK	1	Y(7): 0.0; S(9): 0.0; S(10): 99.9	151	Reverse	Class I
O43166	1	Signal-induced proliferation-associated 1-like protein 1 OS=Homo sapiens GN=SIPA1L1 PE=1 SV=4 - [SI1L1_HUMAN]	O43166	S1632	Signal-induced proliferation-associated 1-like protein 1 (SIPA1-like protein 1) (High-risk human papilloma viruses E6 oncoproteins targeted protein 1) (E6-targeted protein 1)	SIPA1L1 E6TP1 KIAA0440	SLPLRRPSYTLGMKS	1.33869	0.42082	1.19813	0.260779	27300000	20400000	47700000	7.67852	166888			SLPLRRPpSYTLGMK	1	S(1): 0.0; S(8): 100.0; Y(9): 0.0; T(10): 0.0	145	Reverse	Class I
O43166	1	Signal-induced proliferation-associated 1-like protein 1 OS=Homo sapiens GN=SIPA1L1 PE=1 SV=4 - [SI1L1_HUMAN]	O43166	S208	Signal-induced proliferation-associated 1-like protein 1 (SIPA1-like protein 1) (High-risk human papilloma viruses E6 oncoproteins targeted protein 1) (E6-targeted protein 1)	SIPA1L1 E6TP1 KIAA0440	SLHREYGSTSSIDKQ	0.496524	-1.01006	0.444389	-1.1701	17000000	34200000	51200000	7.70927	113638	CK1	CK1d, CK1e	EYGpSTSSIDK	1	Y(2): 0.6; S(4): 80.3; T(5): 6.3; S(6): 6.3; S(7): 6.3	56	Reverse	Class I
O43166	1	Signal-induced proliferation-associated 1-like protein 1 OS=Homo sapiens GN=SIPA1L1 PE=1 SV=4 - [SI1L1_HUMAN]	O43166	S288	Signal-induced proliferation-associated 1-like protein 1 (SIPA1-like protein 1) (High-risk human papilloma viruses E6 oncoproteins targeted protein 1) (E6-targeted protein 1)	SIPA1L1 E6TP1 KIAA0440	PLKRRSKSETGDSSI	1.20773	0.272297	1.08092	0.112257	13700000	11300000	25000000	7.39794	73044			SKpSETGDSSIFRK	1	S(1): 0.0; S(3): 100.0; T(5): 0.0; S(8): 0.0; S(9): 0.0	259	Reverse	Class I
O43237	1	Cytoplasmic dynein 1 light intermediate chain 2 OS=Homo sapiens GN=DYNC1LI2 PE=1 SV=1 - [DC1L2_HUMAN]	O43237	S194	Cytoplasmic dynein 1 light intermediate chain 2 (Dynein light intermediate chain 2, cytosolic) (LIC-2) (LIC53/55)	DYNC1LI2 DNCLI2 LIC2	PEEGCQGSPQRRGPL	1.07411	0.103147	0.961332	-0.0568935	214000000	199000000	413000000	8.61595	124565			DFQDYMEPEEGCQGpSPQRR	1	Y(5): 0.0; S(15): 100.0	84	Reverse	Class I
O43237	1	Cytoplasmic dynein 1 light intermediate chain 2 OS=Homo sapiens GN=DYNC1LI2 PE=1 SV=1 - [DC1L2_HUMAN]	O43237	S383	Cytoplasmic dynein 1 light intermediate chain 2 (Dynein light intermediate chain 2, cytosolic) (LIC-2) (LIC53/55)	DYNC1LI2 DNCLI2 LIC2	TPTRASESPARGPSG	0.783085	-0.352759	0.700861	-0.512799	15400000	19600000	35000000	7.54407	132996			ASEpSPARGPSGSPR	1	S(2): 0.0; S(4): 99.4; S(10): 0.6; S(12): 0.0	162	Reverse	Class I
O43237	1	Cytoplasmic dynein 1 light intermediate chain 2 OS=Homo sapiens GN=DYNC1LI2 PE=1 SV=1 - [DC1L2_HUMAN]	O43237	S391	Cytoplasmic dynein 1 light intermediate chain 2 (Dynein light intermediate chain 2, cytosolic) (LIC-2) (LIC53/55)	DYNC1LI2 DNCLI2 LIC2	PARGPSGSPRTQGRG	0.6035	-0.728574	0.540133	-0.888614	14200000	23500000	37700000	7.57634	143380			ASESPARGPSGpSPR	1	S(2): 0.0; S(4): 0.0; S(10): 0.0; S(12): 100.0	98	Reverse	Class I
O43237	1	Cytoplasmic dynein 1 light intermediate chain 2 OS=Homo sapiens GN=DYNC1LI2 PE=1 SV=1 - [DC1L2_HUMAN]	O43237	S407	Cytoplasmic dynein 1 light intermediate chain 2 (Dynein light intermediate chain 2, cytosolic) (LIC-2) (LIC53/55)	DYNC1LI2 DNCLI2 LIC2	PASVPSSSPGTSVKK	0.782473	-0.353888	0.700313	-0.513928	24200000	30900000	55100000	7.74115	22573			GGPASVPSSpSPGTSVK	1	S(5): 0.0; S(8): 0.0; S(9): 5.9; S(10): 94.0; T(13): 0.0; S(14): 0.0	166	Reverse	Class I
O43237	1	Cytoplasmic dynein 1 light intermediate chain 2 OS=Homo sapiens GN=DYNC1LI2 PE=1 SV=1 - [DC1L2_HUMAN]	O43237	S446	Cytoplasmic dynein 1 light intermediate chain 2 (Dynein light intermediate chain 2, cytosolic) (LIC-2) (LIC53/55)	DYNC1LI2 DNCLI2 LIC2	KKTGSPGSPGAGGVQ	0.75188	-0.411426	0.672932	-0.571467	50500000	67100000	117600000	8.07041	50299			KTGSPGpSPGAGGVQSTAK	1	T(2): 0.0; S(4): 0.0; S(7): 100.0; S(15): 0.0; T(16): 0.0	429	Reverse	Class I
O43237	1	Cytoplasmic dynein 1 light intermediate chain 2 OS=Homo sapiens GN=DYNC1LI2 PE=1 SV=1 - [DC1L2_HUMAN]	O43237	S486	Cytoplasmic dynein 1 light intermediate chain 2 (Dynein light intermediate chain 2, cytosolic) (LIC-2) (LIC53/55)	DYNC1LI2 DNCLI2 LIC2	PDSMVTNSSTENEA*	1.36986	0.454032	1.22603	0.293991	6090000	4450000	10540000	7.02284	156456			KPDSMVTNpSSTENEA	1	S(4): 0.0; T(7): 0.2; S(9): 95.1; S(10): 4.4; T(11): 0.2	107	Reverse	Class I
O43237	1	Cytoplasmic dynein 1 light intermediate chain 2 OS=Homo sapiens GN=DYNC1LI2 PE=1 SV=1 - [DC1L2_HUMAN]	O43237	S487	Cytoplasmic dynein 1 light intermediate chain 2 (Dynein light intermediate chain 2, cytosolic) (LIC-2) (LIC53/55)	DYNC1LI2 DNCLI2 LIC2	DSMVTNSSTENEA**	1.36986	0.454032	1.22603	0.293991	6090000	4450000	10540000	7.02284	156456			KPDSMVTNSpSTENEA	1	S(4): 0.0; T(7): 0.0; S(9): 3.4; S(10): 93.2; T(11): 3.4	145	Reverse	Class I
O43237	1	Cytoplasmic dynein 1 light intermediate chain 2 OS=Homo sapiens GN=DYNC1LI2 PE=1 SV=1 - [DC1L2_HUMAN]	O43237	T376	Cytoplasmic dynein 1 light intermediate chain 2 (Dynein light intermediate chain 2, cytosolic) (LIC-2) (LIC53/55)	DYNC1LI2 DNCLI2 LIC2	LLAKQPATPTRASES	0.60423	-0.726831	0.540785	-0.886872	408000	675000	1083000	6.03463	133355			QPApTPTRASESPAR	1	T(4): 98.4; T(6): 1.6; S(9): 0.0; S(11): 0.0	109	Reverse	Class I
O43237	1	Cytoplasmic dynein 1 light intermediate chain 2 OS=Homo sapiens GN=DYNC1LI2 PE=1 SV=1 - [DC1L2_HUMAN]	O43237	T410	Cytoplasmic dynein 1 light intermediate chain 2 (Dynein light intermediate chain 2, cytosolic) (LIC-2) (LIC53/55)	DYNC1LI2 DNCLI2 LIC2	VPSSSPGTSVKKPDP	0.779423	-0.359521	0.697584	-0.519562	132000000	170000000	302000000	8.48001	26146			GGPASVPSSSPGpTSVK	1	S(5): 0.0; S(8): 0.3; S(9): 4.7; S(10): 4.7; T(13): 85.7; S(14): 4.7	127	Reverse	Class I
O43290	1	U4/U6.U5 tri-snRNP-associated protein 1 OS=Homo sapiens GN=SART1 PE=1 SV=1 - [SNUT1_HUMAN]	O43290	S321	U4/U6.U5 tri-snRNP-associated protein 1 (SNU66 homolog) (hSnu66) (Squamous cell carcinoma antigen recognized by T-cells 1) (SART-1) (hSART-1) (U4/U6.U5 tri-snRNP-associated 110 kDa protein) (allergen Hom s 1)	SART1	LPYAEDESVDDLAQQ	1.82815	0.870387	1.6362	0.710347	1420000	779000	2199000	6.34223	89547			KKPDYLPYAEDEpSVDDLAQQKPR	1	Y(5): 0.0; Y(8): 1.1; S(13): 98.9	52	Reverse	Class I
O43290	1	U4/U6.U5 tri-snRNP-associated protein 1 OS=Homo sapiens GN=SART1 PE=1 SV=1 - [SNUT1_HUMAN]	O43290	S598	U4/U6.U5 tri-snRNP-associated protein 1 (SNU66 homolog) (hSnu66) (Squamous cell carcinoma antigen recognized by T-cells 1) (SART-1) (hSART-1) (U4/U6.U5 tri-snRNP-associated 110 kDa protein) (allergen Hom s 1)	SART1	SANGGSESDGEENIG	1.23609	0.305788	1.1063	0.145748	72500000	58700000	131200000	8.11793	101586			SANGGSEpSDGEENIGWSTVNLDEEK	1	S(1): 0.0; S(6): 0.0; S(8): 100.0; S(17): 0.0; T(18): 0.0	394	Reverse	Class I
O43293	1	Death-associated protein kinase 3 OS=Homo sapiens GN=DAPK3 PE=1 SV=1 - [DAPK3_HUMAN]	O43293	S311	Death-associated protein kinase 3 (DAP kinase 3) (EC 2.7.11.1) (DAP-like kinase) (Dlk) (MYPT1 kinase) (Zipper-interacting protein kinase) (ZIP-kinase)	DAPK3 ZIPK	EYTIKSHSSLPPNNS	1.62075	0.696658	1.45057	0.536617	6460000	3980000	10440000	7.0187	135389	CAMK/DAPK	DAPK2, DAPK3, DRAK1, DRAK2	SHpSSLPPNNSYADFER	1	S(1): 0.4; S(3): 99.2; S(4): 0.4; S(10): 0.0; Y(11): 0.0	274	Reverse	Class I
O43293	1	Death-associated protein kinase 3 OS=Homo sapiens GN=DAPK3 PE=1 SV=1 - [DAPK3_HUMAN]	O43293	S312	Death-associated protein kinase 3 (DAP kinase 3) (EC 2.7.11.1) (DAP-like kinase) (Dlk) (MYPT1 kinase) (Zipper-interacting protein kinase) (ZIP-kinase)	DAPK3 ZIPK	YTIKSHSSLPPNNSY	1.02459	0.0350469	0.917008	-0.124993	8370000	8170000	16540000	7.21854	135347			SHSpSLPPNNSYADFER	1	S(1): 0.0; S(3): 0.4; S(4): 99.6; S(10): 0.0; Y(11): 0.0	220	Reverse	Class I
O43294	1	Transforming growth factor beta-1-induced transcript 1 protein OS=Homo sapiens GN=TGFB1I1 PE=1 SV=2 - [TGFI1_HUMAN]	O43294	S137	Transforming growth factor beta-1-induced transcript 1 protein (Androgen receptor coactivator 55 kDa protein) (Androgen receptor-associated protein of 55 kDa) (Hydrogen peroxide-inducible clone 5 protein) (Hic-5)	TGFB1I1 ARA55	SEDKKRPSLPSSPSP	1.36986	0.454032	1.22603	0.293991	70200000	51200000	121400000	8.08422	166434	CMGC/MAPK	Erk2, Erk7	KRPpSLPSSPSPGLPK	1	S(4): 100.0; S(7): 0.0; S(8): 0.0; S(10): 0.0	132	Reverse	Class I
O43294	1	Transforming growth factor beta-1-induced transcript 1 protein OS=Homo sapiens GN=TGFB1I1 PE=1 SV=2 - [TGFI1_HUMAN]	O43294	S140	Transforming growth factor beta-1-induced transcript 1 protein (Androgen receptor coactivator 55 kDa protein) (Androgen receptor-associated protein of 55 kDa) (Hydrogen peroxide-inducible clone 5 protein) (Hic-5)	TGFB1I1 ARA55	KKRPSLPSSPSPGLP	1.43885	0.524915	1.28777	0.364875	7730000	5370000	13100000	7.11727	139935	Atypical/PDHK	PDHK3	KRPSLPpSpSPSPGLPK	2	S(4): 6.5; S(7): 93.5; S(8): 93.5; S(10): 6.5	64	Reverse	Class I
O43294	1	Transforming growth factor beta-1-induced transcript 1 protein OS=Homo sapiens GN=TGFB1I1 PE=1 SV=2 - [TGFI1_HUMAN]	O43294	S141	Transforming growth factor beta-1-induced transcript 1 protein (Androgen receptor coactivator 55 kDa protein) (Androgen receptor-associated protein of 55 kDa) (Hydrogen peroxide-inducible clone 5 protein) (Hic-5)	TGFB1I1 ARA55	KRPSLPSSPSPGLPK	1.92678	0.946194	1.72447	0.786153	5570000	2890000	8460000	6.92737	84241	CMGC/DYRK	HIPK3	KRPSLPSpSPSPGLPK	1	S(4): 0.7; S(7): 0.7; S(8): 98.6; S(10): 0.1	122	Reverse	Class I
O43294	1	Transforming growth factor beta-1-induced transcript 1 protein OS=Homo sapiens GN=TGFB1I1 PE=1 SV=2 - [TGFI1_HUMAN]	O43294	S143	Transforming growth factor beta-1-induced transcript 1 protein (Androgen receptor coactivator 55 kDa protein) (Androgen receptor-associated protein of 55 kDa) (Hydrogen peroxide-inducible clone 5 protein) (Hic-5)	TGFB1I1 ARA55	PSLPSSPSPGLPKAS	1.49031	0.575615	1.33383	0.415575	28200000	18900000	47100000	7.67302	84256	CMGC/DYRK	HIPK3	KRPSLPSSPpSPGLPK	1	S(4): 0.0; S(7): 0.0; S(8): 0.5; S(10): 99.5	145	Reverse	Class I
O43294	1	Transforming growth factor beta-1-induced transcript 1 protein OS=Homo sapiens GN=TGFB1I1 PE=1 SV=2 - [TGFI1_HUMAN]	O43294	S164	Transforming growth factor beta-1-induced transcript 1 protein (Androgen receptor coactivator 55 kDa protein) (Androgen receptor-associated protein of 55 kDa) (Hydrogen peroxide-inducible clone 5 protein) (Hic-5)	TGFB1I1 ARA55	ELDRLMASLSDFRVQ	1.27877	0.354759	1.1445	0.194719	16400000	12800000	29200000	7.46538	111027			LMApSLSDFR	1	S(4): 100.0; S(6): 0.0	90	Reverse	Class I
O43303	1	Centrosomal protein of 110 kDa OS=Homo sapiens GN=CEP110 PE=1 SV=3 - [CE110_HUMAN]	O43303	S370	Centriolar coiled-coil protein of 110 kDa (Centrosomal protein of 110 kDa) (CP110) (Cep110)	CCP110 CEP110 CP110 KIAA0419	KLPSPEPSMSPKMHR	0.867303	-0.205393	0.776236	-0.365433	206000000	238000000	444000000	8.64738	113811	Other/PLK	PLK1, PLK4	LPSPEPpSMSPK	1	S(3): 0.0; S(7): 99.7; S(9): 0.3	87	Reverse	Class I
O43303	1	Centrosomal protein of 110 kDa OS=Homo sapiens GN=CEP110 PE=1 SV=3 - [CE110_HUMAN]	O43303	S372	Centriolar coiled-coil protein of 110 kDa (Centrosomal protein of 110 kDa) (CP110) (Cep110)	CCP110 CEP110 CP110 KIAA0419	PSPEPSMSPKMHRRR	1.08578	0.118727	0.97177	-0.0413135	32100000	29600000	61700000	7.79029	108802	CMGC/CDK/CDC2	CDC2, CDK2	LPSPEPSMpSPK	1	S(3): 0.0; S(7): 1.3; S(9): 98.7	104	Reverse	Class I
O43306	1	Adenylate cyclase type 6 OS=Homo sapiens GN=ADCY6 PE=1 SV=2 - [ADCY6_HUMAN]	O43306	S54	Adenylate cyclase type 6 (EC 4.6.1.1) (ATP pyrophosphate-lyase 6) (Adenylate cyclase type VI) (Adenylyl cyclase 6) (Ca(2+)-inhibitable adenylyl cyclase)	ADCY6 KIAA0422	LRDAEPPSPTPAGPP	0.93633	-0.0949116	0.838015	-0.254952	21700000	23100000	44800000	7.65128	22419			DAEPPpSPTPAGPPR	1	S(6): 100.0; T(8): 0.0	142	Reverse	Class I
O43306	1	Adenylate cyclase type 6 OS=Homo sapiens GN=ADCY6 PE=1 SV=2 - [ADCY6_HUMAN]	O43306	S576	Adenylate cyclase type 6 (EC 4.6.1.1) (ATP pyrophosphate-lyase 6) (Adenylate cyclase type VI) (Adenylyl cyclase 6) (Ca(2+)-inhibitable adenylyl cyclase)	ADCY6 KIAA0422	LQRTRANSMEGLMPR	1.36054	0.444184	1.21769	0.284143	13700000	10000000	23700000	7.37475	24260	AGC/AKT	AKT1	ANpSMEGLMPR	1	S(3): 100.0	169	Reverse	Class I
O43310	1	Uncharacterized protein KIAA0427 OS=Homo sapiens GN=KIAA0427 PE=1 SV=1 - [K0427_HUMAN]	O43310	S18	CBP80/20-dependent translation initiation factor	CTIF KIAA0427	SEAGSSRSQEIEELE	1.2987	0.37707	1.16234	0.217029	3510000	2700000	6210000	6.79309	104319			pSQEIEELER	1	S(1): 100.0	53	Reverse	Class I
O43310	1	Uncharacterized protein KIAA0427 OS=Homo sapiens GN=KIAA0427 PE=1 SV=1 - [K0427_HUMAN]	O43310	S299	CBP80/20-dependent translation initiation factor	CTIF KIAA0427	SSLEAPRSPDTLAPV	1.16959	0.226004	1.04678	0.0659633	6390000	5460000	11850000	7.07372	148790			ETMTIENPKLEDTAGDTGHSSLEAPRpSPDTLAPVASER	1	T(2): 0.2; T(4): 0.3; T(13): 3.2; T(17): 3.2; S(20): 3.2; S(21): 6.6; S(27): 76.6; T(30): 6.6; S(36): 0.2	33	Reverse	Class I
O43312	1	Metastasis suppressor protein 1 OS=Homo sapiens GN=MTSS1 PE=1 SV=2 - [MTSS1_HUMAN]	O43312	T592	Metastasis suppressor protein 1 (Metastasis suppressor YGL-1) (Missing in metastasis protein)	MTSS1 KIAA0429 MIM	GVATIRRTPSTKPSV	0.766871	-0.382944	0.68635	-0.542984	1410000	1840000	3250000	6.51188	83023			RpTPSTKPSVR	1	T(2): 99.3; S(4): 0.7; T(5): 0.0; S(8): 0.0	84	Reverse	Class I
O43314	1	Inositol hexakisphosphate and diphosphoinositol-pentakisphosphate kinase 2 OS=Homo sapiens GN=HISPPD1 PE=1 SV=3 - [VIP2_HUMAN]	O43314	S1006	Inositol hexakisphosphate and diphosphoinositol-pentakisphosphate kinase 2 (EC 2.7.4.21) (EC 2.7.4.24) (Diphosphoinositol pentakisphosphate kinase 2) (Histidine acid phosphatase domain-containing protein 1) (InsP6 and PP-IP5 kinase 2) (VIP1 homolog 2) (hsVIP2)	PPIP5K2 HISPPD1 KIAA0433 VIP2	TGRRRRRSGEQITSS	1.04822	0.0679388	0.938155	-0.0921016	13200000	12600000	25800000	7.41162	17069			pSGEQITSSPVSPK	1	S(1): 100.0; T(6): 0.0; S(7): 0.0; S(8): 0.0; S(11): 0.0	74	Reverse	Class I
O43314	1	Inositol hexakisphosphate and diphosphoinositol-pentakisphosphate kinase 2 OS=Homo sapiens GN=HISPPD1 PE=1 SV=3 - [VIP2_HUMAN]	O43314	S1108	Inositol hexakisphosphate and diphosphoinositol-pentakisphosphate kinase 2 (EC 2.7.4.21) (EC 2.7.4.24) (Diphosphoinositol pentakisphosphate kinase 2) (Histidine acid phosphatase domain-containing protein 1) (InsP6 and PP-IP5 kinase 2) (VIP1 homolog 2) (hsVIP2)	PPIP5K2 HISPPD1 KIAA0433 VIP2	GSAVKRFSISFARHP	1.2837	0.360305	1.14891	0.200264	4200000	3270000	7470000	6.87332	67003			RFpSISFAR	1	S(3): 99.0; S(5): 1.0	52	Reverse	Class I
O43314	1	Inositol hexakisphosphate and diphosphoinositol-pentakisphosphate kinase 2 OS=Homo sapiens GN=HISPPD1 PE=1 SV=3 - [VIP2_HUMAN]	O43314	S1171	Inositol hexakisphosphate and diphosphoinositol-pentakisphosphate kinase 2 (EC 2.7.4.21) (EC 2.7.4.24) (Diphosphoinositol pentakisphosphate kinase 2) (Histidine acid phosphatase domain-containing protein 1) (InsP6 and PP-IP5 kinase 2) (VIP1 homolog 2) (hsVIP2)	PPIP5K2 HISPPD1 KIAA0433 VIP2	ISSTALRSSPIMRKK	0.914913	-0.128293	0.818847	-0.288334	18200000	19900000	38100000	7.58092	51953			TAEISSTALRpSSPIMR	1	T(1): 0.0; S(5): 0.7; S(6): 0.7; T(7): 0.7; S(11): 97.1; S(12): 0.7	200	Reverse	Class I
O43314	1	Inositol hexakisphosphate and diphosphoinositol-pentakisphosphate kinase 2 OS=Homo sapiens GN=HISPPD1 PE=1 SV=3 - [VIP2_HUMAN]	O43314	S1172	Inositol hexakisphosphate and diphosphoinositol-pentakisphosphate kinase 2 (EC 2.7.4.21) (EC 2.7.4.24) (Diphosphoinositol pentakisphosphate kinase 2) (Histidine acid phosphatase domain-containing protein 1) (InsP6 and PP-IP5 kinase 2) (VIP1 homolog 2) (hsVIP2)	PPIP5K2 HISPPD1 KIAA0433 VIP2	SSTALRSSPIMRKKV	1.04058	0.0573917	0.931322	-0.102649	240000000	230000000	470000000	8.6721	51702			TAEISSTALRSpSPIMR	1	T(1): 0.0; S(5): 0.0; S(6): 0.0; T(7): 0.0; S(11): 0.0; S(12): 100.0	342	Reverse	Class I
O43318	1	Mitogen-activated protein kinase kinase kinase 7 OS=Homo sapiens GN=MAP3K7 PE=1 SV=1 - [M3K7_HUMAN]	O43318	S389	Mitogen-activated protein kinase kinase kinase 7 (EC 2.7.11.25) (Transforming growth factor-beta-activated kinase 1) (TGF-beta-activated kinase 1)	MAP3K7 TAK1	TSEGKRMSADMSEIE	1.15473	0.207561	1.03349	0.0475207	71200000	61700000	132900000	8.12352	158910	STE/STE-Unique/NIK	NIK	RMpSADMSEIEAR	1	S(3): 100.0; S(7): 0.0	96	Reverse	Class I
O43318	1	Mitogen-activated protein kinase kinase kinase 7 OS=Homo sapiens GN=MAP3K7 PE=1 SV=1 - [M3K7_HUMAN]	O43318	S439	Mitogen-activated protein kinase kinase kinase 7 (EC 2.7.11.25) (Transforming growth factor-beta-activated kinase 1) (TGF-beta-activated kinase 1)	MAP3K7 TAK1	NGQPRRRSIQDLTVT	1.287	0.364013	1.15187	0.203973	32600000	25300000	57900000	7.76268	14956	TKL/IRAK	IRAK1, IRAK2	pSIQDLTVTGTEPGQVSSR	1	S(1): 100.0; T(6): 0.0; T(8): 0.0; T(10): 0.0; S(16): 0.0; S(17): 0.0	278	Reverse	Class I
O43318	1	Mitogen-activated protein kinase kinase kinase 7 OS=Homo sapiens GN=MAP3K7 PE=1 SV=1 - [M3K7_HUMAN]	O43318	T444	Mitogen-activated protein kinase kinase kinase 7 (EC 2.7.11.25) (Transforming growth factor-beta-activated kinase 1) (TGF-beta-activated kinase 1)	MAP3K7 TAK1	RRSIQDLTVTGTEPG	1.3587	0.442222	1.21603	0.282182	15200000	11200000	26400000	7.4216	105331	CAMK/MAPKAPK	MAPKAPK2, MAPKAPK3	SIQDLpTVTGTEPGQVSSR	1	S(1): 0.4; T(6): 99.2; T(8): 0.4; T(10): 0.0; S(16): 0.0; S(17): 0.0	79	Reverse	Class I
O43379	1	WD repeat-containing protein 62 OS=Homo sapiens GN=WDR62 PE=1 SV=2 - [WDR62_HUMAN]	O43379	S1144	WD repeat-containing protein 62	WDR62 C19orf14	RAGTGYASPDRTHVL	1.18343	0.242977	1.05917	0.0829363	19800000	16700000	36500000	7.56229	68372	CMGC/MAPK	JNK2	AGTGYApSPDRTHVLAAGK	1	T(3): 0.0; Y(5): 0.0; S(7): 100.0; T(11): 0.0	222	Reverse	Class I
O43395	1	U4/U6 small nuclear ribonucleoprotein Prp3 OS=Homo sapiens GN=PRPF3 PE=1 SV=2 - [PRPF3_HUMAN]	O43395	S619	U4/U6 small nuclear ribonucleoprotein Prp3 (Pre-mRNA-splicing factor 3) (hPrp3) (U4/U6 snRNP 90 kDa protein)	PRPF3 HPRP3 PRP3	KGDDDEESDEEAVKK	1.24533	0.316528	1.11457	0.156488	31800000	25500000	57300000	7.75815	65593	Other/CK2	CK2a2	WDEQTSNTKGDDDEEpSDEEAVKK	1	T(5): 0.0; S(6): 0.0; T(8): 0.0; S(16): 100.0	244	Reverse	Class I
O43396	1	Thioredoxin-like protein 1 OS=Homo sapiens GN=TXNL1 PE=1 SV=3 - [TXNL1_HUMAN]	O43396	S113	Thioredoxin-like protein 1 (32 kDa thioredoxin-related protein)	TXNL1 TRP32 TXL TXNL	HLENDPGSNEDTDIP	1.1325	0.179515	1.01359	0.0194742	7390000	6530000	13920000	7.14364	169253			IKQHLENDPGpSNEDTDIPK	1	S(11): 100.0; T(15): 0.0	198	Reverse	Class I
O43399	1	Tumor protein D54 OS=Homo sapiens GN=TPD52L2 PE=1 SV=2 - [TPD54_HUMAN]	O43399	S161	Tumor protein D54 (hD54) (Tumor protein D52-like 2)	TPD52L2	KLGDMRNSATFKSFE	1.34409	0.426625	1.20296	0.266585	2670000	1990000	4660000	6.66839	168896			KLGDMRNpSATFK	1	S(8): 98.7; T(10): 1.3	50	Reverse	Class I
O43399	1	Tumor protein D54 OS=Homo sapiens GN=TPD52L2 PE=1 SV=2 - [TPD54_HUMAN]	O43399	S166	Tumor protein D54 (hD54) (Tumor protein D52-like 2)	TPD52L2	RNSATFKSFEDRVGT	1.3245	0.405451	1.18543	0.245411	908000000	685000000	1593000000	9.20222	60618			NSATFKpSFEDR	1	S(2): 0.0; T(4): 0.0; S(7): 100.0	137	Reverse	Class I
O43399	1	Tumor protein D54 OS=Homo sapiens GN=TPD52L2 PE=1 SV=2 - [TPD54_HUMAN]	O43399	S19	Tumor protein D54 (hD54) (Tumor protein D52-like 2)	TPD52L2	SPNKGLLSDSMTDVP	1.40252	0.488026	1.25526	0.327986	2840000	2020000	4860000	6.68664	106066			GLLpSDSMTDVPVDTGVAAR	1	S(4): 83.7; S(6): 8.1; T(8): 8.1; T(14): 0.0	55	Reverse	Class I
O43399	1	Tumor protein D54 OS=Homo sapiens GN=TPD52L2 PE=1 SV=2 - [TPD54_HUMAN]	O43399	S21	Tumor protein D54 (hD54) (Tumor protein D52-like 2)	TPD52L2	NKGLLSDSMTDVPVD	1.00908	0.013043	0.903128	-0.146997	53400000	52900000	106300000	8.02653	24998			GLLSDpSMTDVPVDTGVAAR	1	S(4): 0.0; S(6): 100.0; T(8): 0.0; T(14): 0.0	340	Reverse	Class I
O43399	1	Tumor protein D54 OS=Homo sapiens GN=TPD52L2 PE=1 SV=2 - [TPD54_HUMAN]	O43399	T23	Tumor protein D54 (hD54) (Tumor protein D52-like 2)	TPD52L2	GLLSDSMTDVPVDTG	0.979432	-0.0299829	0.876592	-0.190023	26900000	27500000	54400000	7.7356	19841			GLLSDSMpTDVPVDTGVAAR	1	S(4): 0.4; S(6): 6.0; T(8): 93.6; T(14): 0.0	82	Reverse	Class I
O43426	1	Synaptojanin-1 OS=Homo sapiens GN=SYNJ1 PE=1 SV=1 - [SYNJ1_HUMAN]	O43426	S1223	Synaptojanin-1 (EC 3.1.3.36) (Synaptic inositol 1,4,5-trisphosphate 5-phosphatase 1)	SYNJ1 KIAA0910	AGRLTPESQSKTSET	1.01729	0.0247367	0.910478	-0.135304	15100000	14800000	29900000	7.47567	158848			ASAGRLTPEpSQSK	1	S(2): 0.0; T(7): 0.6; S(10): 99.4; S(12): 0.0	140	Reverse	Class I
O43426	1	Synaptojanin-1 OS=Homo sapiens GN=SYNJ1 PE=1 SV=1 - [SYNJ1_HUMAN]	O43426	S1345	Synaptojanin-1 (EC 3.1.3.36) (Synaptic inositol 1,4,5-trisphosphate 5-phosphatase 1)	SYNJ1 KIAA0910	AQLSVQTSPVPTPDP	0.92081	-0.119024	0.824125	-0.279065	25500000	27600000	53100000	7.72509	23775	CMGC/DYRK	DYRK1A	AQLSVQTpSPVPTPDPK	1	S(4): 0.0; T(7): 0.0; S(8): 100.0; T(12): 0.0	246	Reverse	Class I
O43426	1	Synaptojanin-1 OS=Homo sapiens GN=SYNJ1 PE=1 SV=1 - [SYNJ1_HUMAN]	O43426	S1394	Synaptojanin-1 (EC 3.1.3.36) (Synaptic inositol 1,4,5-trisphosphate 5-phosphatase 1)	SYNJ1 KIAA0910	SQENMRSSPNPFITG	1.07875	0.109359	0.96548	-0.0506817	38800000	36000000	74800000	7.8739	29794			SpSPNPFITGLTR	1	S(1): 2.6; S(2): 97.4; T(8): 0.0; T(11): 0.0	121	Reverse	Class I
O43426	1	Synaptojanin-1 OS=Homo sapiens GN=SYNJ1 PE=1 SV=1 - [SYNJ1_HUMAN]	O43426	S1567	Synaptojanin-1 (EC 3.1.3.36) (Synaptic inositol 1,4,5-trisphosphate 5-phosphatase 1)	SYNJ1 KIAA0910	TTLASKASPTLDFTE	1.27226	0.347399	1.13868	0.187358	23900000	18800000	42700000	7.63043	28378	CMGC/DYRK	DYRK1A	ApSPTLDFTER	1	S(2): 99.9; T(4): 0.1; T(8): 0.0	108	Reverse	Class I
O43426	1	Synaptojanin-1 OS=Homo sapiens GN=SYNJ1 PE=1 SV=1 - [SYNJ1_HUMAN]	O43426	T1220	Synaptojanin-1 (EC 3.1.3.36) (Synaptic inositol 1,4,5-trisphosphate 5-phosphatase 1)	SYNJ1 KIAA0910	RASAGRLTPESQSKT	0.99108	-0.0129262	0.887017	-0.172967	100000000	101000000	201000000	8.3032	133295	CMGC/DYRK	DYRK1A	ASAGRLpTPESQSK	1	S(2): 0.0; T(7): 99.6; S(10): 0.4; S(12): 0.0	182	Reverse	Class I
O43432	1	Eukaryotic translation initiation factor 4 gamma 3 OS=Homo sapiens GN=EIF4G3 PE=1 SV=2 - [IF4G3_HUMAN]	O43432	S1131	Eukaryotic translation initiation factor 4 gamma 3 (eIF-4-gamma 3) (eIF-4G 3) (eIF4G 3) (eIF-4-gamma II) (eIF4GII)	EIF4G3	RTLTSRGSMGREKND	0.952381	-0.0703893	0.852381	-0.23043	2100000	2210000	4310000	6.63448	56971			TLTSRGpSMGR	1	T(1): 0.0; T(3): 0.0; S(4): 0.0; S(7): 100.0	245	Reverse	Class I
O43432	1	Eukaryotic translation initiation factor 4 gamma 3 OS=Homo sapiens GN=EIF4G3 PE=1 SV=2 - [IF4G3_HUMAN]	O43432	S1156	Eukaryotic translation initiation factor 4 gamma 3 (eIF-4-gamma 3) (eIF-4G 3) (eIF4G 3) (eIF-4-gamma II) (eIF4GII)	EIF4G3	NTFMRGGSSKDLLDN	1.04932	0.0694519	0.93914	-0.0905885	222000000	212000000	434000000	8.63749	68235	CAMK/CAMK1	CaMK1a	GGpSSKDLLDNQSQEEQRR	1	S(3): 94.0; S(4): 6.0; S(12): 0.0	92	Reverse	Class I
O43432	1	Eukaryotic translation initiation factor 4 gamma 3 OS=Homo sapiens GN=EIF4G3 PE=1 SV=2 - [IF4G3_HUMAN]	O43432	S1165	Eukaryotic translation initiation factor 4 gamma 3 (eIF-4-gamma 3) (eIF-4G 3) (eIF4G 3) (eIF-4-gamma II) (eIF4GII)	EIF4G3	KDLLDNQSQEEQRRE	1.08342	0.115597	0.969664	-0.044443	17900000	16500000	34400000	7.53656	147644			GGSSKDLLDNQpSQEEQRR	1	S(3): 0.0; S(4): 0.0; S(12): 100.0	98	Reverse	Class I
O43432	1	Eukaryotic translation initiation factor 4 gamma 3 OS=Homo sapiens GN=EIF4G3 PE=1 SV=2 - [IF4G3_HUMAN]	O43432	S1409	Eukaryotic translation initiation factor 4 gamma 3 (eIF-4-gamma 3) (eIF-4G 3) (eIF4G 3) (eIF-4-gamma II) (eIF4GII)	EIF4G3	LDFIESDSPCSSEAL	1.13507	0.182786	1.01589	0.0227457	10600000	9350000	19950000	7.29994	125897			LDFIESDpSPCSSEALSKK	1	S(6): 0.0; S(8): 99.4; S(11): 0.6; S(12): 0.0; S(16): 0.0	200	Reverse	Class I
O43432	1	Eukaryotic translation initiation factor 4 gamma 3 OS=Homo sapiens GN=EIF4G3 PE=1 SV=2 - [IF4G3_HUMAN]	O43432	S1412	Eukaryotic translation initiation factor 4 gamma 3 (eIF-4-gamma 3) (eIF-4G 3) (eIF4G 3) (eIF-4-gamma II) (eIF4GII)	EIF4G3	IESDSPCSSEALSKK	1.08696	0.120294	0.972826	-0.0397462	14800000	13600000	28400000	7.45332	49026			LDFIESDSPCpSSEALSKK	1	S(6): 0.0; S(8): 0.8; S(11): 98.5; S(12): 0.8; S(16): 0.0	207	Reverse	Class I
O43432	1	Eukaryotic translation initiation factor 4 gamma 3 OS=Homo sapiens GN=EIF4G3 PE=1 SV=2 - [IF4G3_HUMAN]	O43432	S232	Eukaryotic translation initiation factor 4 gamma 3 (eIF-4-gamma 3) (eIF-4G 3) (eIF4G 3) (eIF-4-gamma II) (eIF4GII)	EIF4G3	DPVLKSPSPVLRLVL	0.207684	-2.26754	0.185877	-2.42758	7780000	37500000	45280000	7.65591	114007			SPpSPVLR	1	S(1): 0.3; S(3): 99.7	62	Reverse	Class I
O43432	1	Eukaryotic translation initiation factor 4 gamma 3 OS=Homo sapiens GN=EIF4G3 PE=1 SV=2 - [IF4G3_HUMAN]	O43432	S240	Eukaryotic translation initiation factor 4 gamma 3 (eIF-4-gamma 3) (eIF-4G 3) (eIF4G 3) (eIF-4-gamma II) (eIF4GII)	EIF4G3	PVLRLVLSGEKKEQE	1.04384	0.0619024	0.934238	-0.098138	12500000	12000000	24500000	7.38917	134201			LVLpSGEKK	1	S(4): 100.0	93	Reverse	Class I
O43432	1	Eukaryotic translation initiation factor 4 gamma 3 OS=Homo sapiens GN=EIF4G3 PE=1 SV=2 - [IF4G3_HUMAN]	O43432	S495	Eukaryotic translation initiation factor 4 gamma 3 (eIF-4-gamma 3) (eIF-4G 3) (eIF4G 3) (eIF-4-gamma II) (eIF4GII)	EIF4G3	QNLNSRRSPVPAQIA	1.16959	0.226004	1.04678	0.0659633	54900000	47000000	101900000	8.00817	55688	Atypical/PIKK/FRAP	FRAP	RpSPVPAQIAITVPK	1	S(2): 100.0; T(11): 0.0	214	Reverse	Class I
O43491	1	Band 4.1-like protein 2 OS=Homo sapiens GN=EPB41L2 PE=1 SV=1 - [E41L2_HUMAN]	O43491	S38	Band 4.1-like protein 2 (Generally expressed protein 4.1) (4.1G)	EPB41L2	AENQQNQSSDPEEEK	0.829876	-0.269033	0.742739	-0.429074	6050000	7280000	13330000	7.12483	108176			EVAENQQNQpSSDPEEEK	1	S(10): 92.9; S(11): 7.1	194	Reverse	Class I
O43491	1	Band 4.1-like protein 2 OS=Homo sapiens GN=EPB41L2 PE=1 SV=1 - [E41L2_HUMAN]	O43491	S39	Band 4.1-like protein 2 (Generally expressed protein 4.1) (4.1G)	EPB41L2	ENQQNQSSDPEEEKG	0.734754	-0.444667	0.657605	-0.604707	16000000	21800000	37800000	7.57749	22064			EVAENQQNQSpSDPEEEK	1	S(10): 0.0; S(11): 100.0	304	Reverse	Class I
O43491	1	Band 4.1-like protein 2 OS=Homo sapiens GN=EPB41L2 PE=1 SV=1 - [E41L2_HUMAN]	O43491	S499	Band 4.1-like protein 2 (Generally expressed protein 4.1) (4.1G)	EPB41L2	HTFYRLVSPEQPPKA	1.08932	0.123434	0.974946	-0.0366065	78500000	72100000	150600000	8.17782	113420			LVpSPEQPPK	1	S(3): 100.0	95	Reverse	Class I
O43491	1	Band 4.1-like protein 2 OS=Homo sapiens GN=EPB41L2 PE=1 SV=1 - [E41L2_HUMAN]	O43491	S55	Band 4.1-like protein 2 (Generally expressed protein 4.1) (4.1G)	EPB41L2	QPPPAAESQSSLRRQ	0.825083	-0.27739	0.738449	-0.43743	1580000	1920000	3500000	6.54407	31226			GSQPPPAAEpSQSpSLRR	2	S(2): 0.0; S(10): 99.9; S(12): 0.2; S(13): 99.9	142	Reverse	Class I
O43491	1	Band 4.1-like protein 2 OS=Homo sapiens GN=EPB41L2 PE=1 SV=1 - [E41L2_HUMAN]	O43491	S58	Band 4.1-like protein 2 (Generally expressed protein 4.1) (4.1G)	EPB41L2	PAAESQSSLRRQKRE	0.786782	-0.345964	0.70417	-0.506004	277000000	352000000	629000000	8.79865	50617			GSQPPPAAESQSpSLRR	1	S(2): 0.0; S(10): 0.0; S(12): 0.2; S(13): 99.8	215	Reverse	Class I
O43491	1	Band 4.1-like protein 2 OS=Homo sapiens GN=EPB41L2 PE=1 SV=1 - [E41L2_HUMAN]	O43491	S614	Band 4.1-like protein 2 (Generally expressed protein 4.1) (4.1G)	EPB41L2	LIEGKKNSLRVEGDN	0.628536	-0.669934	0.562539	-0.829974	2520000	4000000	6520000	6.81425	79193			KNpSLRVEGDNIYVR	1	S(3): 100.0; Y(12): 0.0	304	Reverse	Class I
O43491	1	Band 4.1-like protein 2 OS=Homo sapiens GN=EPB41L2 PE=1 SV=1 - [E41L2_HUMAN]	O43491	S683	Band 4.1-like protein 2 (Generally expressed protein 4.1) (4.1G)	EPB41L2	SLQTQGSSHETLNIV	1.41443	0.500218	1.26591	0.340177	39900000	28200000	68100000	7.83315	45652			ITPLSLQTQGSpSHETLNIVEEK	1	T(2): 0.0; S(5): 0.0; T(8): 0.0; S(11): 1.1; S(12): 97.8; T(15): 1.1	169	Reverse	Class I
O43491	1	Band 4.1-like protein 2 OS=Homo sapiens GN=EPB41L2 PE=1 SV=1 - [E41L2_HUMAN]	O43491	S715	Band 4.1-like protein 2 (Generally expressed protein 4.1) (4.1G)	EPB41L2	EMNGKEISPGSGPGE	1.24533	0.316528	1.11457	0.156488	19500000	15700000	35200000	7.54654	109479			EIpSPGSGPGEIR	1	S(3): 100.0; S(6): 0.0	131	Reverse	Class I
O43491	1	Band 4.1-like protein 2 OS=Homo sapiens GN=EPB41L2 PE=1 SV=1 - [E41L2_HUMAN]	O43491	S718	Band 4.1-like protein 2 (Generally expressed protein 4.1) (4.1G)	EPB41L2	GKEISPGSGPGEIRK	0.929368	-0.105678	0.831784	-0.265718	45400000	48800000	94200000	7.97405	26958			EISPGpSGPGEIR	1	S(3): 0.1; S(6): 99.9	63	Reverse	Class I
O43491	1	Band 4.1-like protein 2 OS=Homo sapiens GN=EPB41L2 PE=1 SV=1 - [E41L2_HUMAN]	O43491	S87	Band 4.1-like protein 2 (Generally expressed protein 4.1) (4.1G)	EPB41L2	PWLKKQKSYTLVVAK	1.23457	0.304006	1.10494	0.143966	495000000	401000000	896000000	8.95231	18934			pSYTLVVAK	1	S(1): 97.0; Y(2): 2.9; T(3): 0.1	98	Reverse	Class I
O43491;Q9Y2J2	2	Band 4.1-like protein 2 OS=Homo sapiens GN=EPB41L2 PE=1 SV=1 - [E41L2_HUMAN]|Band 4.1-like protein 3 OS=Homo sapiens GN=EPB41L3 PE=1 SV=2 - [E41L3_HUMAN]	O43491	T510	Band 4.1-like protein 2 (Generally expressed protein 4.1) (4.1G)	EPB41L2	PPKAKFLTLGSKFRY	0.701262	-0.511974	0.62763	-0.672014	4610000	6570000	11180000	7.04844	28678			FLpTLGSK	1	T(3): 100.0; S(6): 0.0	88	Reverse	Class I	Q9Y2J2	T401	Band 4.1-like protein 3 (4.1B) (Differentially expressed in adenocarcinoma of the lung protein 1) (DAL-1)	EPB41L3 DAL1 KIAA0987
O43491	1	Band 4.1-like protein 2 OS=Homo sapiens GN=EPB41L2 PE=1 SV=1 - [E41L2_HUMAN]	O43491	T686	Band 4.1-like protein 2 (Generally expressed protein 4.1) (4.1G)	EPB41L2	TQGSSHETLNIVEEK	1.18203	0.24127	1.05792	0.08123	298000000	253000000	551000000	8.74115	49261			ITPLSLQTQGSSHEpTLNIVEEK	1	T(2): 0.0; S(5): 0.0; T(8): 0.0; S(11): 1.1; S(12): 1.1; T(15): 97.7	149	Reverse	Class I
O43493	1	Trans-Golgi network integral membrane protein 2 OS=Homo sapiens GN=TGOLN2 PE=1 SV=2 - [TGON2_HUMAN]	O43493	S224	Trans-Golgi network integral membrane protein 2 (TGN38 homolog) (TGN46) (TGN48) (Trans-Golgi network protein TGN51)	TGOLN2 TGN46 TGN51	PKDGSNKSGAEEQGP	2.33645	1.22432	2.09112	1.06428	1710000	735000	2445000	6.38828	40683			DGSNKpSGAEEQGPIDGPSK	1	S(3): 0.0; S(6): 100.0; S(18): 0.0	287	Reverse	Class I
O43493	1	Trans-Golgi network integral membrane protein 2 OS=Homo sapiens GN=TGOLN2 PE=1 SV=2 - [TGON2_HUMAN]	O43493	S298	Trans-Golgi network integral membrane protein 2 (TGN38 homolog) (TGN46) (TGN48) (Trans-Golgi network protein TGN51)	TGOLN2 TGN46 TGN51	PHAFKTESGEETDLI	1.46413	0.550043	1.3104	0.390002	46500000	31700000	78200000	7.89321	101275	Other/CK2	CK2a2	TEpSGEETDLISPPQEEVK	1	T(1): 0.0; S(3): 100.0; T(7): 0.0; S(11): 0.0	229	Reverse	Class I
O43493	1	Trans-Golgi network integral membrane protein 2 OS=Homo sapiens GN=TGOLN2 PE=1 SV=2 - [TGON2_HUMAN]	O43493	S71	Trans-Golgi network integral membrane protein 2 (TGN38 homolog) (TGN46) (TGN48) (Trans-Golgi network protein TGN51)	TGOLN2 TGN46 TGN51	KDSPSKSSAEAQTPE	1.06838	0.0954196	0.956197	-0.0646208	74500000	69700000	144200000	8.15897	43019	Other/CK2	CK2a2	DSPSKSpSAEAQTPEDTPNK	1	S(2): 0.0; S(4): 0.0; S(6): 0.0; S(7): 100.0; T(12): 0.0; T(16): 0.0	296	Reverse	Class I
O43493	1	Trans-Golgi network integral membrane protein 2 OS=Homo sapiens GN=TGOLN2 PE=1 SV=2 - [TGON2_HUMAN]	O43493	T296	Trans-Golgi network integral membrane protein 2 (TGN38 homolog) (TGN46) (TGN48) (Trans-Golgi network protein TGN51)	TGOLN2 TGN46 TGN51	LSPHAFKTESGEETD	1.57729	0.657445	1.41167	0.497405	95400000	60500000	155900000	8.19285	64069	Other/CK2	CK2a2	LSPHAFKpTESGEETDLISPPQEEVK	1	S(2): 0.0; T(8): 98.8; S(10): 1.2; T(14): 0.0; S(18): 0.0	209	Reverse	Class I
O43516	1	WAS/WASL-interacting protein family member 1 OS=Homo sapiens GN=WIPF1 PE=1 SV=2 - [WIPF1_HUMAN]	O43516	T398	WAS/WASL-interacting protein family member 1 (Protein PRPL-2) (Wiskott-Aldrich syndrome protein-interacting protein) (WASP-interacting protein)	WIPF1 WASPIP WIP	TSRALPATPQLPSRS	0.445434	-1.16672	0.398664	-1.32676	9100000	20400000	29500000	7.46982	23823			ALPApTPQLPSR	1	T(5): 100.0; S(10): 0.0	120	Reverse	Class I
O43524	1	Forkhead box protein O3 OS=Homo sapiens GN=FOXO3 PE=1 SV=1 - [FOXO3_HUMAN]	O43524	S299	Forkhead box protein O3 (AF6q21 protein) (Forkhead in rhabdomyosarcoma-like 1)	FOXO3 FKHRL1 FOXO3A	PGSPTSRSSDELDAW	1.35501	0.438307	1.21274	0.278267	2250000	1660000	3910000	6.59218	101937	Atypical/PDHK	PDHK4	pSSDELDAWTDFR	1	S(1): 99.7; S(2): 0.3; T(9): 0.0	190	Reverse	Class I
O43572	1	A kinase anchor protein 10, mitochondrial OS=Homo sapiens GN=AKAP10 PE=2 SV=2 - [AKA10_HUMAN]	O43572	S187	A-kinase anchor protein 10, mitochondrial (AKAP-10) (Dual specificity A kinase-anchoring protein 2) (D-AKAP-2) (Protein kinase A-anchoring protein 10) (PRKA10)	AKAP10	SSLAEPVSPSKKHET	1.52207	0.606035	1.36225	0.445994	142000000	93500000	235500000	8.37199	114175			QSSLAEPVpSPSK	1	S(2): 0.0; S(3): 0.0; S(9): 92.4; S(11): 7.6	71	Reverse	Class I
O43572	1	A kinase anchor protein 10, mitochondrial OS=Homo sapiens GN=AKAP10 PE=2 SV=2 - [AKA10_HUMAN]	O43572	S281	A-kinase anchor protein 10, mitochondrial (AKAP-10) (Dual specificity A kinase-anchoring protein 2) (D-AKAP-2) (Protein kinase A-anchoring protein 10) (PRKA10)	AKAP10	ASRNSPASPLKELSG	0.621504	-0.686164	0.556246	-0.846205	4750000	7640000	12390000	7.09307	108651			NSPApSPLK	1	S(2): 0.0; S(5): 100.0	95	Reverse	Class I
O43583	1	Density-regulated protein OS=Homo sapiens GN=DENR PE=1 SV=2 - [DENR_HUMAN]	O43583	S73	Density-regulated protein (DRP) (Protein DRP1) (Smooth muscle cell-associated protein 3) (SMAP-3)	DENR DRP1 H14	AKLTVENSPKQEAGI	1.08225	0.114035	0.968615	-0.0460052	410000000	379000000	789000000	8.89708	124332	CMGC/CDK/CDC2	CDC2	LTVENpSPKQEAGISEGQGTAGEEEEK	1	T(2): 0.0; S(6): 100.0; S(14): 0.0; T(19): 0.0	358	Reverse	Class I
O43583	1	Density-regulated protein OS=Homo sapiens GN=DENR PE=1 SV=2 - [DENR_HUMAN]	O43583	T86	Density-regulated protein (DRP) (Protein DRP1) (Smooth muscle cell-associated protein 3) (SMAP-3)	DENR DRP1 H14	GISEGQGTAGEEEEK	1.3587	0.442222	1.21603	0.282182	1700000	1250000	2950000	6.46982	127827			LTVENSPKQEAGISEGQGpTAGEEEEK	1	T(2): 0.0; S(6): 0.0; S(14): 0.0; T(19): 100.0	167	Reverse	Class I
O43598	1	c-Myc-responsive protein Rcl OS=Homo sapiens GN=RCL PE=1 SV=1 - [RCL_HUMAN]	O43598	S169	Deoxyribonucleoside 5'-monophosphate N-glycosidase (EC 3.2.2.-) (c-Myc-responsive protein Rcl)	RCL C6orf108	PPGQVAASPDPTT**	1.25786	0.330973	1.12579	0.170933	8900000	7070000	15970000	7.2033	96008			YFEADPPGQVAApSPDPTT	1	Y(1): 0.0; S(13): 100.0; T(17): 0.0; T(18): 0.0	238	Reverse	Class I
O43639	1	Cytoplasmic protein NCK2 OS=Homo sapiens GN=NCK2 PE=1 SV=2 - [NCK2_HUMAN]	O43639	S90	Cytoplasmic protein NCK2 (Growth factor receptor-bound protein 4) (NCK adaptor protein 2) (Nck-2) (SH2/SH3 adaptor protein NCK-beta)	NCK2 GRB4	KTSARDASPTPSTDA	0.859107	-0.219091	0.7689	-0.379131	10400000	12100000	22500000	7.35218	16736	CMGC/GSK	GSK3A	DApSPTPSTDAEYPANGSGADR	1	S(3): 100.0; T(5): 0.0; S(7): 0.0; T(8): 0.0; Y(12): 0.0; S(17): 0.0	154	Reverse	Class I
O43639	1	Cytoplasmic protein NCK2 OS=Homo sapiens GN=NCK2 PE=1 SV=2 - [NCK2_HUMAN]	O43639	S94	Cytoplasmic protein NCK2 (Growth factor receptor-bound protein 4) (NCK adaptor protein 2) (Nck-2) (SH2/SH3 adaptor protein NCK-beta)	NCK2 GRB4	RDASPTPSTDAEYPA	1.23762	0.307573	1.10767	0.147532	10100000	8130000	18230000	7.26079	96655			DApSPTPpSTDAEYPANGSGADR	2	S(3): 99.0; T(5): 2.0; S(7): 98.0; T(8): 1.0; Y(12): 0.0; S(17): 0.0	216	Reverse	Class I
O43663	1	Protein regulator of cytokinesis 1 OS=Homo sapiens GN=PRC1 PE=1 SV=1 - [PRC1_HUMAN]	O43663	T470	Protein regulator of cytokinesis 1	PRC1	LYGSAPRTPSKRRGL	0.928505	-0.107018	0.831012	-0.267059	2080000	2240000	4320000	6.63548	124387	CMGC/CDK/CDC2	CDC2, CDK2	QTETEMLYGSAPRpTPSK	1	T(2): 0.0; T(4): 0.0; Y(8): 0.0; S(10): 0.0; T(14): 98.8; S(16): 1.2	153	Reverse	Class I
O43663	1	Protein regulator of cytokinesis 1 OS=Homo sapiens GN=PRC1 PE=1 SV=1 - [PRC1_HUMAN]	O43663	T481	Protein regulator of cytokinesis 1	PRC1	RRGLAPNTPGKARKL	1.02354	0.0335695	0.91607	-0.126471	34600000	33700000	68300000	7.83442	22194	Atypical/PIKK/FRAP	FRAP	GLAPNpTPGK	1	T(6): 100.0	130	Reverse	Class I
O43684	1	Mitotic checkpoint protein BUB3 OS=Homo sapiens GN=BUB3 PE=1 SV=1 - [BUB3_HUMAN]	O43684	S211	Mitotic checkpoint protein BUB3	BUB3	AVEYLDPSPEVQKKK	1.37552	0.459973	1.23109	0.299932	10000000	7300000	17300000	7.23805	24555	CMGC/CDK/CDC2	CDC2	VAVEYLDPpSPEVQK	1	Y(5): 0.0; S(9): 100.0	208	Reverse	Class I
O43707	1	Alpha-actinin-4 OS=Homo sapiens GN=ACTN4 PE=1 SV=2 - [ACTN4_HUMAN]	O43707	S507	Alpha-actinin-4 (F-actin cross-linking protein) (Non-muscle alpha-actinin 4)	ACTN4	DQWDALGSLTHSRRE	1.41443	0.500218	1.26591	0.340177	1160000	819000	1979000	6.29645	79984			ICDQWDALGpSLTHSRR	1	S(10): 99.8; T(12): 0.2; S(14): 0.0	122	Reverse	Class I
O43719	1	HIV Tat-specific factor 1 OS=Homo sapiens GN=HTATSF1 PE=1 SV=1 - [HTSF1_HUMAN]	O43719	S453	HIV Tat-specific factor 1 (Tat-SF1)	HTATSF1	ENNAKESSPEKEAEE	1.08342	0.115597	0.969664	-0.044443	6740000	6220000	12960000	7.11261	43395	CMGC/CDK/CDC2	CDK2, CDK3	ESpSPEKEAEEGCPEK	1	S(2): 0.0; S(3): 100.0	165	Reverse	Class I
O43719	1	HIV Tat-specific factor 1 OS=Homo sapiens GN=HTATSF1 PE=1 SV=1 - [HTSF1_HUMAN]	O43719	S498	HIV Tat-specific factor 1 (Tat-SF1)	HTATSF1	VRGSEEDSPKKESKK	1.14286	0.192645	1.02286	0.0326047	258000000	226000000	484000000	8.68485	67712	CMGC/CDK/CDC2	CDK2, CDK3	ESEEGNPVRGSEEDpSPKK	1	S(2): 0.0; S(11): 0.0; S(15): 100.0	242	Reverse	Class I
O43719	1	HIV Tat-specific factor 1 OS=Homo sapiens GN=HTATSF1 PE=1 SV=1 - [HTSF1_HUMAN]	O43719	S579	HIV Tat-specific factor 1 (Tat-SF1)	HTATSF1	KDLDEEGSEKELHEN	1.10254	0.140826	0.98677	-0.0192149	62100000	56400000	118500000	8.07372	63642			DLDEEGpSEKELHENVLDK	1	S(7): 100.0	119	Reverse	Class I
O43719	1	HIV Tat-specific factor 1 OS=Homo sapiens GN=HTATSF1 PE=1 SV=1 - [HTSF1_HUMAN]	O43719	S616	HIV Tat-specific factor 1 (Tat-SF1)	HTATSF1	KVLDEEGSEREFDED	1.04822	0.0679388	0.938155	-0.0921016	95700000	91300000	187000000	8.27184	41443			VLDEEGpSEREFDEDpSDEKEEEEDTYEK	2	S(7): 100.0; S(15): 100.0; T(24): 0.0; Y(25): 0.0	187	Reverse	Class I
O43719	1	HIV Tat-specific factor 1 OS=Homo sapiens GN=HTATSF1 PE=1 SV=1 - [HTSF1_HUMAN]	O43719	S624	HIV Tat-specific factor 1 (Tat-SF1)	HTATSF1	EREFDEDSDEKEEEE	1.04822	0.0679388	0.938155	-0.0921016	95700000	91300000	187000000	8.27184	41443			VLDEEGpSEREFDEDpSDEKEEEEDTYEK	2	S(7): 100.0; S(15): 100.0; T(24): 0.0; Y(25): 0.0	187	Reverse	Class I
O43719	1	HIV Tat-specific factor 1 OS=Homo sapiens GN=HTATSF1 PE=1 SV=1 - [HTSF1_HUMAN]	O43719	S642	HIV Tat-specific factor 1 (Tat-SF1)	HTATSF1	EKVFDDESDEKEDEE	1.10497	0.14401	0.98895	-0.0160301	146000000	132000000	278000000	8.44404	124356			VFDDEpSDEKEDEEYADEK	1	S(6): 100.0; Y(14): 0.0	180	Reverse	Class I
O43719	1	HIV Tat-specific factor 1 OS=Homo sapiens GN=HTATSF1 PE=1 SV=1 - [HTSF1_HUMAN]	O43719	S676	HIV Tat-specific factor 1 (Tat-SF1)	HTATSF1	DEKLFEESDDKEDED	1.13895	0.187707	1.01936	0.0276667	280000000	246000000	526000000	8.72099	144877			LFEEpSDDKEDEDADGKEVEDADEK	1	S(5): 100.0	189	Reverse	Class I
O43719	1	HIV Tat-specific factor 1 OS=Homo sapiens GN=HTATSF1 PE=1 SV=1 - [HTSF1_HUMAN]	O43719	S702	HIV Tat-specific factor 1 (Tat-SF1)	HTATSF1	KLFEDDDSNEKLFDE	1.9685	0.9771	1.76181	0.817059	98300000	50000000	148300000	8.17114	109020			LFEDDDpSNEK	1	S(7): 100.0	182	Reverse	Class I
O43719	1	HIV Tat-specific factor 1 OS=Homo sapiens GN=HTATSF1 PE=1 SV=1 - [HTSF1_HUMAN]	O43719	S713	HIV Tat-specific factor 1 (Tat-SF1)	HTATSF1	LFDEEEDSSEKLFDD	1.37363	0.45799	1.2294	0.297949	58500000	42600000	101100000	8.00475	26741			LFDEEEDpSSEK	1	S(8): 95.6; S(9): 4.4	82	Reverse	Class I
O43741	1	5'-AMP-activated protein kinase subunit beta-2 OS=Homo sapiens GN=PRKAB2 PE=1 SV=1 - [AAKB2_HUMAN]	O43741	S184	5'-AMP-activated protein kinase subunit beta-2 (AMPK subunit beta-2)	PRKAB2	SCRDLSSSPPGPYGQ	1.18064	0.239566	1.05667	0.0795257	40200000	34100000	74300000	7.87099	15815	Atypical/PIKK/FRAP	FRAP	DLSSpSPPGPYGQEMYAFR	1	S(3): 0.0; S(4): 0.0; S(5): 100.0; Y(10): 0.0; Y(15): 0.0	238	Reverse	Class I
O43741	1	5'-AMP-activated protein kinase subunit beta-2 OS=Homo sapiens GN=PRKAB2 PE=1 SV=1 - [AAKB2_HUMAN]	O43741	S39	5'-AMP-activated protein kinase subunit beta-2 (AMPK subunit beta-2)	PRKAB2	EHKIMVGSTDDPSVF	1.05042	0.0709665	0.940126	-0.0890739	23400000	22200000	45600000	7.65896	20827	Atypical/PIKK/FRAP	FRAP	IMVGpSTDDPSVFSLPDSK	1	S(5): 92.0; T(6): 7.3; S(10): 0.7; S(13): 0.0; S(17): 0.0	60	Reverse	Class I
O43747	1	AP-1 complex subunit gamma-1 OS=Homo sapiens GN=AP1G1 PE=1 SV=5 - [AP1G1_HUMAN]	O43747	S149	AP-1 complex subunit gamma-1 (Adapter-related protein complex 1 subunit gamma-1) (Adaptor protein complex AP-1 subunit gamma-1) (Clathrin assembly protein complex 1 gamma-1 large chain) (Gamma1-adaptin) (Golgi adaptor HA1/AP1 adaptin subunit gamma-1)	AP1G1 ADTG CLAPG1	VEKLLKTSNSYLRKK	1.24533	0.316528	1.11457	0.156488	613000000	492000000	1105000000	9.04336	51760			LLKpTpSNSpYLRK	3	T(4): 97.9; S(5): 97.9; S(7): 16.7; Y(8): 87.5	72	Reverse	Class I
O43747	1	AP-1 complex subunit gamma-1 OS=Homo sapiens GN=AP1G1 PE=1 SV=5 - [AP1G1_HUMAN]	O43747	T148	AP-1 complex subunit gamma-1 (Adapter-related protein complex 1 subunit gamma-1) (Adaptor protein complex AP-1 subunit gamma-1) (Clathrin assembly protein complex 1 gamma-1 large chain) (Gamma1-adaptin) (Golgi adaptor HA1/AP1 adaptin subunit gamma-1)	AP1G1 ADTG CLAPG1	EVEKLLKTSNSYLRK	1.24533	0.316528	1.11457	0.156488	613000000	492000000	1105000000	9.04336	51760			LLKpTpSNSpYLRK	3	T(4): 97.9; S(5): 97.9; S(7): 16.7; Y(8): 87.5	72	Reverse	Class I
O43747	1	AP-1 complex subunit gamma-1 OS=Homo sapiens GN=AP1G1 PE=1 SV=5 - [AP1G1_HUMAN]	O43747	Y152	AP-1 complex subunit gamma-1 (Adapter-related protein complex 1 subunit gamma-1) (Adaptor protein complex AP-1 subunit gamma-1) (Clathrin assembly protein complex 1 gamma-1 large chain) (Gamma1-adaptin) (Golgi adaptor HA1/AP1 adaptin subunit gamma-1)	AP1G1 ADTG CLAPG1	LLKTSNSYLRKKAAL	1.24533	0.316528	1.11457	0.156488	613000000	492000000	1105000000	9.04336	51760			LLKpTpSNSpYLRK	3	T(4): 97.9; S(5): 97.9; S(7): 16.7; Y(8): 87.5	72	Reverse	Class I
O43765	1	Small glutamine-rich tetratricopeptide repeat-containing protein alpha OS=Homo sapiens GN=SGTA PE=1 SV=1 - [SGTA_HUMAN]	O43765	S301	Small glutamine-rich tetratricopeptide repeat-containing protein alpha (Alpha-SGT) (Vpu-binding protein) (UBP)	SGTA SGT SGT1	QLRSQIRSRTPSASN	1.05042	0.0709665	0.940126	-0.0890739	43900000	41800000	85700000	7.93298	31072	AGC/AKT	AKT1	SQIRpSRTPpSASNDDQQE	2	S(1): 0.0; S(5): 100.0; T(7): 0.6; S(9): 99.5; S(11): 0.0	217	Reverse	Class I
O43765	1	Small glutamine-rich tetratricopeptide repeat-containing protein alpha OS=Homo sapiens GN=SGTA PE=1 SV=1 - [SGTA_HUMAN]	O43765	S305	Small glutamine-rich tetratricopeptide repeat-containing protein alpha (Alpha-SGT) (Vpu-binding protein) (UBP)	SGTA SGT SGT1	QIRSRTPSASNDDQQ	2.34742	1.23107	2.10094	1.07103	169000	71900	240900	5.38184	21748	AGC/AKT	AKT1	SRTPpSASNDDQQE	1	S(1): 0.6; T(3): 0.6; S(5): 98.2; S(7): 0.6	59	Reverse	Class I
O43765	1	Small glutamine-rich tetratricopeptide repeat-containing protein alpha OS=Homo sapiens GN=SGTA PE=1 SV=1 - [SGTA_HUMAN]	O43765	S84	Small glutamine-rich tetratricopeptide repeat-containing protein alpha (Alpha-SGT) (Vpu-binding protein) (UBP)	SGTA SGT SGT1	SPARTPPSEEDSAEA	0.858369	-0.22033	0.76824	-0.38037	4160000	4850000	9010000	6.95472	137234	Atypical/PIKK/FRAP	FRAP	SPARTPPpSEEDSAEAER	1	S(1): 5.7; T(5): 5.7; S(8): 88.1; S(12): 0.4	76	Reverse	Class I
O43765	1	Small glutamine-rich tetratricopeptide repeat-containing protein alpha OS=Homo sapiens GN=SGTA PE=1 SV=1 - [SGTA_HUMAN]	O43765	T81	Small glutamine-rich tetratricopeptide repeat-containing protein alpha (Alpha-SGT) (Vpu-binding protein) (UBP)	SGTA SGT SGT1	DLRSPARTPPSEEDS	1.0989	0.136062	0.983516	-0.0239789	54900000	50000000	104900000	8.02078	50626	Atypical/PIKK/FRAP	FRAP	SPARpTPPSEEDSAEAER	1	S(1): 0.0; T(5): 100.0; S(8): 0.0; S(12): 0.0	304	Reverse	Class I
O43768	1	Alpha-endosulfine OS=Homo sapiens GN=ENSA PE=1 SV=1 - [ENSA_HUMAN]	O43768	S43	Alpha-endosulfine (ARPP-19e)	ENSA	KLKAKYPSLGQKPGG	0.986193	-0.0200577	0.882643	-0.180098	5370000	5450000	10820000	7.03423	163409			AKYPpSLGQKPGGSDFLMK	1	Y(3): 8.3; S(5): 91.7; S(13): 0.0	122	Reverse	Class I
O43815	1	Striatin OS=Homo sapiens GN=STRN PE=1 SV=4 - [STRN_HUMAN]	O43815	S245	Striatin	STRN	ESAAADFSDEDEDDD	1.26743	0.341903	1.13435	0.181862	216000000	171000000	387000000	8.58771	125349			FLESAAADFpSDEDEDDDVDGREK	1	S(4): 0.0; S(10): 100.0	210	Reverse	Class I
O43823	1	A-kinase anchor protein 8 OS=Homo sapiens GN=AKAP8 PE=1 SV=1 - [AKAP8_HUMAN]	O43823	S323	A-kinase anchor protein 8 (AKAP-8) (A-kinase anchor protein 95 kDa) (AKAP 95)	AKAP8 AKAP95	TKLARVDSEGDFSEN	1.30719	0.386468	1.16993	0.226428	10500000	8010000	18510000	7.26741	95899			VDpSEGDFpSENDDAAGDFR	2	S(3): 100.0; S(8): 100.0	255	Reverse	Class I
O43823	1	A-kinase anchor protein 8 OS=Homo sapiens GN=AKAP8 PE=1 SV=1 - [AKAP8_HUMAN]	O43823	S328	A-kinase anchor protein 8 (AKAP-8) (A-kinase anchor protein 95 kDa) (AKAP 95)	AKAP8 AKAP95	VDSEGDFSENDDAAG	1.49925	0.584241	1.34183	0.424201	7690000	5130000	12820000	7.10789	100866			VDSEGDFpSENDDAAGDFR	1	S(3): 0.0; S(8): 100.0	230	Reverse	Class I
O43847	1	Nardilysin OS=Homo sapiens GN=NRD1 PE=2 SV=2 - [NRDC_HUMAN]	O43847	S94	Nardilysin (EC 3.4.24.61) (N-arginine dibasic convertase) (NRD convertase) (NRD-C)	NRD1	EEEGRRGSLSNAGDP	1.19904	0.261881	1.07314	0.10184	28400000	23700000	52100000	7.71684	144630			RGpSLSNAGDPEIVK	1	S(3): 100.0; S(5): 0.0	190	Reverse	Class I
O43847	1	Nardilysin OS=Homo sapiens GN=NRD1 PE=2 SV=2 - [NRDC_HUMAN]	O43847	S96	Nardilysin (EC 3.4.24.61) (N-arginine dibasic convertase) (NRD convertase) (NRD-C)	NRD1	EGRRGSLSNAGDPEI	1.10619	0.145605	0.990044	-0.0144351	20100000	18200000	38300000	7.5832	159688			RGSLpSNAGDPEIVK	1	S(3): 0.4; S(5): 99.6	78	Reverse	Class I
O43896	1	Kinesin-like protein KIF1C OS=Homo sapiens GN=KIF1C PE=1 SV=3 - [KIF1C_HUMAN]	O43896	S1092	Kinesin-like protein KIF1C	KIF1C KIAA0706	PRMRRQRSAPDLKES	0.930233	-0.104337	0.832558	-0.264377	30500000	32800000	63300000	7.8014	108610	Other/CK2	CK2a1, CK2a2	pSAPDLK	1	S(1): 100.0	85	Reverse	Class I
O43896	1	Kinesin-like protein KIF1C OS=Homo sapiens GN=KIF1C PE=1 SV=3 - [KIF1C_HUMAN]	O43896	S852	Kinesin-like protein KIF1C	KIF1C KIAA0706	QEVKLQNSSKDRELQ	1.64204	0.715486	1.46962	0.555445	834000	508000	1342000	6.12775	151233			LQNpSSKDRELQALR	1	S(4): 99.4; S(5): 0.6	140	Reverse	Class I
O43896	1	Kinesin-like protein KIF1C OS=Homo sapiens GN=KIF1C PE=1 SV=3 - [KIF1C_HUMAN]	O43896	S915	Kinesin-like protein KIF1C	KIF1C KIAA0706	MPSARPPSPPLSSWE	1.3459	0.428566	1.20458	0.268525	56100000	41700000	97800000	7.99034	52783			MPSARPPpSPPLSSWER	1	S(3): 0.0; S(8): 100.0; S(12): 0.0; S(13): 0.0	162	Reverse	Class I
O43896	1	Kinesin-like protein KIF1C OS=Homo sapiens GN=KIF1C PE=1 SV=3 - [KIF1C_HUMAN]	O43896	Y1078	Kinesin-like protein KIF1C	KIF1C KIAA0706	QRPPGPRYPPYTTPP	1.00705	0.0101344	0.901309	-0.149906	249000000	247000000	496000000	8.69548	27060			pYPPYTTPPR	1	Y(1): 99.9; Y(4): 0.0; T(5): 0.0; T(6): 0.0	89	Reverse	Class I
O43930	1	Serine/threonine-protein kinase PRKY OS=Homo sapiens GN=PRKY PE=2 SV=1 - [PRKY_HUMAN]	O43930	T203	Serine/threonine-protein kinase PRKY (EC 2.7.11.1)	PRKY	KLVDRTWTLCGTPEY	1.36986	0.454032	1.22603	0.293991	22300000	16300000	38600000	7.58659	25161			TWpTLCGTPEYLAPEVIQSK	1	T(1): 0.4; T(3): 99.6; T(7): 0.0; Y(10): 0.0; S(18): 0.0	327	Reverse	Class I
O43933	1	Peroxisome biogenesis factor 1 OS=Homo sapiens GN=PEX1 PE=1 SV=1 - [PEX1_HUMAN]	O43933	S1209	Peroxisome biogenesis factor 1 (Peroxin-1) (Peroxisome biogenesis disorder protein 1)	PEX1	IIKGRYRSQSGEDES	1.25	0.321928	1.11875	0.161888	11200000	8950000	20150000	7.30428	16456			pSQSGEDESMNQPGPIK	1	S(1): 92.8; S(3): 7.1; S(8): 0.1	89	Reverse	Class I
O43933	1	Peroxisome biogenesis factor 1 OS=Homo sapiens GN=PEX1 PE=1 SV=1 - [PEX1_HUMAN]	O43933	S1211	Peroxisome biogenesis factor 1 (Peroxin-1) (Peroxisome biogenesis disorder protein 1)	PEX1	KGRYRSQSGEDESMN	1.10619	0.145605	0.990044	-0.0144351	9670000	8740000	18410000	7.26505	16459			SQpSGEDESMNQPGPIK	1	S(1): 4.1; S(3): 95.9; S(8): 0.0	148	Reverse	Class I
O60220	1	Mitochondrial import inner membrane translocase subunit Tim8 A OS=Homo sapiens GN=TIMM8A PE=1 SV=1 - [TIM8A_HUMAN]	O60220	S96	Mitochondrial import inner membrane translocase subunit Tim8 A (Deafness dystonia protein 1) (X-linked deafness dystonia protein)	TIMM8A DDP DDP1 TIM8A	PVFSESLSD******	1.13766	0.186065	1.0182	0.0260245	3130000	2750000	5880000	6.76938	35306	TKL/MLK	MLK3	SKPVFSESLpSD	1	S(1): 0.0; S(6): 0.0; S(8): 0.0; S(10): 100.0	98	Reverse	Class I
O60231	1	Putative pre-mRNA-splicing factor ATP-dependent RNA helicase DHX16 OS=Homo sapiens GN=DHX16 PE=1 SV=2 - [DHX16_HUMAN]	O60231	S103	Putative pre-mRNA-splicing factor ATP-dependent RNA helicase DHX16 (EC 3.6.4.13) (ATP-dependent RNA helicase #3) (DEAH-box protein 16)	DHX16 DBP2 DDX16 KIAA0577	SYRLLEDSEESSEET	1.3986	0.483985	1.25175	0.323944	485000	347000	832000	5.92012	100150			LLEDpSEESSEETVSR	1	S(5): 100.0; S(8): 0.0; S(9): 0.0; T(12): 0.0; S(14): 0.0	123	Reverse	Class I
O60231	1	Putative pre-mRNA-splicing factor ATP-dependent RNA helicase DHX16 OS=Homo sapiens GN=DHX16 PE=1 SV=2 - [DHX16_HUMAN]	O60231	S106	Putative pre-mRNA-splicing factor ATP-dependent RNA helicase DHX16 (EC 3.6.4.13) (ATP-dependent RNA helicase #3) (DEAH-box protein 16)	DHX16 DBP2 DDX16 KIAA0577	LLEDSEESSEETVSR	1.09409	0.129734	0.979212	-0.0303065	324000000	296000000	620000000	8.79239	96772			LLEDpSEEpSSEETVSR	2	S(5): 99.7; S(8): 99.7; S(9): 0.6; T(12): 0.0; S(14): 0.0	149	Reverse	Class I
O60231	1	Putative pre-mRNA-splicing factor ATP-dependent RNA helicase DHX16 OS=Homo sapiens GN=DHX16 PE=1 SV=2 - [DHX16_HUMAN]	O60231	S160	Putative pre-mRNA-splicing factor ATP-dependent RNA helicase DHX16 (EC 3.6.4.13) (ATP-dependent RNA helicase #3) (DEAH-box protein 16)	DHX16 DBP2 DDX16 KIAA0577	QQTEKPESEDEWERT	1.221	0.288065	1.0928	0.128024	172000000	141000000	313000000	8.49554	72690			QQTEKPEpSEDEWERTER	1	T(3): 0.0; S(8): 100.0; T(15): 0.0	121	Reverse	Class I
O60231	1	Putative pre-mRNA-splicing factor ATP-dependent RNA helicase DHX16 OS=Homo sapiens GN=DHX16 PE=1 SV=2 - [DHX16_HUMAN]	O60231	T167	Putative pre-mRNA-splicing factor ATP-dependent RNA helicase DHX16 (EC 3.6.4.13) (ATP-dependent RNA helicase #3) (DEAH-box protein 16)	DHX16 DBP2 DDX16 KIAA0577	SEDEWERTERERLQD	0.652316	-0.616358	0.583823	-0.776398	7970000	12200000	20170000	7.30471	165555			QQTEKPESEDEWERpTER	1	T(3): 0.0; S(8): 1.5; T(15): 98.5	44	Reverse	Class I
O60238	1	BCL2/adenovirus E1B 19 kDa protein-interacting protein 3-like OS=Homo sapiens GN=BNIP3L PE=1 SV=1 - [BNI3L_HUMAN]	O60238	S118	BCL2/adenovirus E1B 19 kDa protein-interacting protein 3-like (Adenovirus E1B19K-binding protein B5) (BCL2/adenovirus E1B 19 kDa protein-interacting protein 3A) (NIP3-like protein X) (NIP3L)	BNIP3L BNIP3A BNIP3H NIX	HTSRDHSSQSEEEVV	0.717875	-0.478195	0.642498	-0.638236	5980000	8330000	14310000	7.15564	46931			DHSpSQSEEEVVEGEK	1	S(3): 0.0; S(4): 99.1; S(6): 0.8	185	Reverse	Class I
O60238	1	BCL2/adenovirus E1B 19 kDa protein-interacting protein 3-like OS=Homo sapiens GN=BNIP3L PE=1 SV=1 - [BNI3L_HUMAN]	O60238	S120	BCL2/adenovirus E1B 19 kDa protein-interacting protein 3-like (Adenovirus E1B19K-binding protein B5) (BCL2/adenovirus E1B 19 kDa protein-interacting protein 3A) (NIP3-like protein X) (NIP3L)	BNIP3L BNIP3A BNIP3H NIX	SRDHSSQSEEEVVEG	0.812348	-0.299831	0.727051	-0.459871	8800000	10800000	19600000	7.29226	123740			DHSSQpSEEEVVEGEK	1	S(3): 0.4; S(4): 0.4; S(6): 99.3	126	Reverse	Class I
O60238	1	BCL2/adenovirus E1B 19 kDa protein-interacting protein 3-like OS=Homo sapiens GN=BNIP3L PE=1 SV=1 - [BNI3L_HUMAN]	O60238	S164	BCL2/adenovirus E1B 19 kDa protein-interacting protein 3-like (Adenovirus E1B19K-binding protein B5) (BCL2/adenovirus E1B 19 kDa protein-interacting protein 3A) (NIP3-like protein X) (NIP3L)	BNIP3L BNIP3A BNIP3H NIX	HFRHPKRSVSLSMRK	1.18483	0.244685	1.06043	0.0846447	2350000	1990000	4340000	6.63749	62976			RpSVSLSMR	1	S(2): 100.0; S(4): 0.0; S(6): 0.0	58	Reverse	Class I
O60238	1	BCL2/adenovirus E1B 19 kDa protein-interacting protein 3-like OS=Homo sapiens GN=BNIP3L PE=1 SV=1 - [BNI3L_HUMAN]	O60238	S65	BCL2/adenovirus E1B 19 kDa protein-interacting protein 3-like (Adenovirus E1B19K-binding protein B5) (BCL2/adenovirus E1B 19 kDa protein-interacting protein 3A) (NIP3-like protein X) (NIP3L)	BNIP3L BNIP3A BNIP3H NIX	EHVPSSSSIHNGDME	1.05932	0.0831412	0.948093	-0.0768992	46600000	43900000	90500000	7.95665	162138			NGGLEHVPSSSpSIHNGDMEK	1	S(9): 0.0; S(10): 0.0; S(11): 1.1; S(12): 98.9	138	Reverse	Class I
O60244	1	Mediator of RNA polymerase II transcription subunit 14 OS=Homo sapiens GN=MED14 PE=1 SV=2 - [MED14_HUMAN]	O60244	S1112	Mediator of RNA polymerase II transcription subunit 14 (Activator-recruited cofactor 150 kDa component) (ARC150) (Cofactor required for Sp1 transcriptional activation subunit 2) (CRSP complex subunit 2) (Mediator complex subunit 14) (RGR1 homolog) (hRGR1) (Thyroid hormone receptor-associated protein complex 170 kDa component) (Trap170) (Transcriptional coactivator CRSP150) (Vitamin D3 receptor-in…	MED14 ARC150 CRSP2 CXorf4 DRIP150 EXLM1 RGR1 TRAP170	RAGNWPGSPQVSGPS	1.14416	0.194295	1.02403	0.0342544	5700000	4980000	10680000	7.02857	98198	CMGC/CDK	CDK11, CDK7, CDK8	AGNWPGpSPQVSGPpSPAAR	2	S(7): 100.0; S(11): 0.0; S(14): 100.0	190	Reverse	Class I
O60244	1	Mediator of RNA polymerase II transcription subunit 14 OS=Homo sapiens GN=MED14 PE=1 SV=2 - [MED14_HUMAN]	O60244	S1119	Mediator of RNA polymerase II transcription subunit 14 (Activator-recruited cofactor 150 kDa component) (ARC150) (Cofactor required for Sp1 transcriptional activation subunit 2) (CRSP complex subunit 2) (Mediator complex subunit 14) (RGR1 homolog) (hRGR1) (Thyroid hormone receptor-associated protein complex 170 kDa component) (Trap170) (Transcriptional coactivator CRSP150) (Vitamin D3 receptor-in…	MED14 ARC150 CRSP2 CXorf4 DRIP150 EXLM1 RGR1 TRAP170	SPQVSGPSPAARMPG	1.14416	0.194295	1.02403	0.0342544	5700000	4980000	10680000	7.02857	98198	CMGC/CDK	CDK11, CDK7, CDK8	AGNWPGpSPQVSGPpSPAAR	2	S(7): 100.0; S(11): 0.0; S(14): 100.0	190	Reverse	Class I
O60244	1	Mediator of RNA polymerase II transcription subunit 14 OS=Homo sapiens GN=MED14 PE=1 SV=2 - [MED14_HUMAN]	O60244	S617	Mediator of RNA polymerase II transcription subunit 14 (Activator-recruited cofactor 150 kDa component) (ARC150) (Cofactor required for Sp1 transcriptional activation subunit 2) (CRSP complex subunit 2) (Mediator complex subunit 14) (RGR1 homolog) (hRGR1) (Thyroid hormone receptor-associated protein complex 170 kDa component) (Trap170) (Transcriptional coactivator CRSP150) (Vitamin D3 receptor-in…	MED14 ARC150 CRSP2 CXorf4 DRIP150 EXLM1 RGR1 TRAP170	TNAKRKLSDDPCPVE	1.24224	0.312939	1.1118	0.152899	5020000	4040000	9060000	6.95713	168761			RKLpSDDPCPVESK	1	S(4): 100.0; S(12): 0.0	136	Reverse	Class I
O60245	1	Protocadherin-7 OS=Homo sapiens GN=PCDH7 PE=1 SV=1 - [PCDH7_HUMAN]	O60245	S1011	Protocadherin-7 (Brain-heart protocadherin) (BH-Pcdh)	PCDH7 BHPCDH	TVQLHPQSPTAGKKH	0.993049	-0.0100637	0.888779	-0.170104	50300000	50700000	101000000	8.00432	66458	Other/IKK	IKKa, IKKb	SSSPLPTVQLHPQpSPTAGKK	1	S(1): 0.0; S(2): 0.0; S(3): 0.0; T(7): 0.0; S(14): 100.0; T(16): 0.0	199	Reverse	Class I
O60245	1	Protocadherin-7 OS=Homo sapiens GN=PCDH7 PE=1 SV=1 - [PCDH7_HUMAN]	O60245	S972	Protocadherin-7 (Brain-heart protocadherin) (BH-Pcdh)	PCDH7 BHPCDH	DSVNEKLSDSPSMGR	0.970874	-0.0426443	0.868932	-0.202685	20600000	21200000	41800000	7.62118	22381			LpSDSPSMGR	1	S(2): 99.5; S(4): 0.5; S(6): 0.0	76	Reverse	Class I
O60245	1	Protocadherin-7 OS=Homo sapiens GN=PCDH7 PE=1 SV=1 - [PCDH7_HUMAN]	O60245	S976	Protocadherin-7 (Brain-heart protocadherin) (BH-Pcdh)	PCDH7 BHPCDH	EKLSDSPSMGRYRSV	0.970874	-0.0426443	0.868932	-0.202685	20600000	21200000	41800000	7.62118	22381			LSDSPpSMGR	1	S(2): 0.5; S(4): 0.5; S(6): 99.1	39	Reverse	Class I
O60245	1	Protocadherin-7 OS=Homo sapiens GN=PCDH7 PE=1 SV=1 - [PCDH7_HUMAN]	O60245	S982	Protocadherin-7 (Brain-heart protocadherin) (BH-Pcdh)	PCDH7 BHPCDH	PSMGRYRSVNGGPGS	0.73692	-0.440421	0.659543	-0.600461	403000	547000	950000	5.97772	31588			YRpSVNGGPGpSPDLAR	2	Y(1): 0.4; S(3): 99.6; S(10): 100.0	139	Reverse	Class I
O60245	1	Protocadherin-7 OS=Homo sapiens GN=PCDH7 PE=1 SV=1 - [PCDH7_HUMAN]	O60245	S989	Protocadherin-7 (Brain-heart protocadherin) (BH-Pcdh)	PCDH7 BHPCDH	SVNGGPGSPDLARHY	1.02564	0.0365259	0.917949	-0.123515	147000000	144000000	291000000	8.46389	114088			SVNGGPGpSPDLAR	1	S(1): 0.0; S(8): 100.0	144	Reverse	Class I
O60264	1	SWI/SNF-related matrix-associated actin-dependent regulator of chromatin subfamily A member 5 OS=Homo sapiens GN=SMARCA5 PE=1 SV=1 - [SMCA5_HUMAN]	O60264	S116	SWI/SNF-related matrix-associated actin-dependent regulator of chromatin subfamily A member 5 (SWI/SNF-related matrix-associated actin-dependent regulator of chromatin A5) (EC 3.6.4.-) (Sucrose nonfermenting protein 2 homolog) (hSNF2H)	SMARCA5 SNF2H WCRF135	AAQKTPTSPLKMKPG	1.15607	0.209228	1.03468	0.0491875	2430000	2100000	4530000	6.6561	156592	CMGC/CDK/CDC2	CDK2	TPTpSPLK	1	T(1): 0.0; T(3): 4.0; S(4): 96.0	70	Reverse	Class I
O60264	1	SWI/SNF-related matrix-associated actin-dependent regulator of chromatin subfamily A member 5 OS=Homo sapiens GN=SMARCA5 PE=1 SV=1 - [SMCA5_HUMAN]	O60264	T113	SWI/SNF-related matrix-associated actin-dependent regulator of chromatin subfamily A member 5 (SWI/SNF-related matrix-associated actin-dependent regulator of chromatin A5) (EC 3.6.4.-) (Sucrose nonfermenting protein 2 homolog) (hSNF2H)	SMARCA5 SNF2H WCRF135	IQPAAQKTPTSPLKM	1.19332	0.254978	1.06802	0.0949374	13100000	11000000	24100000	7.38202	136176	CMGC/CDK/CDC2	CDK2	QTELFAHFIQPAAQKpTPpTSPLK	2	T(2): 0.0; T(16): 100.0; T(18): 98.9; S(19): 1.1	197	Reverse	Class I
O60264	1	SWI/SNF-related matrix-associated actin-dependent regulator of chromatin subfamily A member 5 OS=Homo sapiens GN=SMARCA5 PE=1 SV=1 - [SMCA5_HUMAN]	O60264	T115	SWI/SNF-related matrix-associated actin-dependent regulator of chromatin subfamily A member 5 (SWI/SNF-related matrix-associated actin-dependent regulator of chromatin A5) (EC 3.6.4.-) (Sucrose nonfermenting protein 2 homolog) (hSNF2H)	SMARCA5 SNF2H WCRF135	PAAQKTPTSPLKMKP	1.19332	0.254978	1.06802	0.0949374	13100000	11000000	24100000	7.38202	136176	AGC/RSK	MSK1	QTELFAHFIQPAAQKpTPpTSPLK	2	T(2): 0.0; T(16): 100.0; T(18): 98.9; S(19): 1.1	197	Reverse	Class I
O60271	1	C-jun-amino-terminal kinase-interacting protein 4 OS=Homo sapiens GN=SPAG9 PE=1 SV=4 - [JIP4_HUMAN]	O60271	S1188	C-Jun-amino-terminal kinase-interacting protein 4 (JIP-4) (JNK-interacting protein 4) (Cancer/testis antigen 89) (CT89) (Human lung cancer oncogene 6 protein) (HLC-6) (JNK-associated leucine-zipper protein) (JLP) (Mitogen-activated protein kinase 8-interacting protein 4) (Proliferation-inducing protein 6) (Protein highly expressed in testis) (PHET) (Sperm surface protein) (Sperm-associated antige…	SPAG9 HSS KIAA0516 MAPK8IP4 SYD1 HLC6	VPGNRPGSVIRVYGD	0.98912	-0.015783	0.885262	-0.175823	11300000	11500000	22800000	7.35793	60335			TSGVPGNRPGpSVIR	1	T(1): 0.0; S(2): 0.0; S(11): 100.0	194	Reverse	Class I
O60271	1	C-jun-amino-terminal kinase-interacting protein 4 OS=Homo sapiens GN=SPAG9 PE=1 SV=4 - [JIP4_HUMAN]	O60271	S183	C-Jun-amino-terminal kinase-interacting protein 4 (JIP-4) (JNK-interacting protein 4) (Cancer/testis antigen 89) (CT89) (Human lung cancer oncogene 6 protein) (HLC-6) (JNK-associated leucine-zipper protein) (JLP) (Mitogen-activated protein kinase 8-interacting protein 4) (Proliferation-inducing protein 6) (Protein highly expressed in testis) (PHET) (Sperm surface protein) (Sperm-associated antige…	SPAG9 HSS KIAA0516 MAPK8IP4 SYD1 HLC6	RTKLHQLSGSDQLES	1.30719	0.386468	1.16993	0.226428	3490000	2670000	6160000	6.78958	166068	Other/CK2	CK2a2	LHQLpSGSDQLESTAHSR	1	S(5): 100.0; S(7): 0.0; S(12): 0.0; T(13): 0.0; S(16): 0.0	180	Reverse	Class I
O60271	1	C-jun-amino-terminal kinase-interacting protein 4 OS=Homo sapiens GN=SPAG9 PE=1 SV=4 - [JIP4_HUMAN]	O60271	S203	C-Jun-amino-terminal kinase-interacting protein 4 (JIP-4) (JNK-interacting protein 4) (Cancer/testis antigen 89) (CT89) (Human lung cancer oncogene 6 protein) (HLC-6) (JNK-associated leucine-zipper protein) (JLP) (Mitogen-activated protein kinase 8-interacting protein 4) (Proliferation-inducing protein 6) (Protein highly expressed in testis) (PHET) (Sperm surface protein) (Sperm-associated antige…	SPAG9 HSS KIAA0516 MAPK8IP4 SYD1 HLC6	IRKERPISLGIFPLP	1.0627	0.0877334	0.951116	-0.072307	121000000	113000000	234000000	8.36922	49701			ERPIpSLGIFPLPAGDGLLTPDAQK	1	S(5): 100.0; T(19): 0.0	379	Reverse	Class I
O60271	1	C-jun-amino-terminal kinase-interacting protein 4 OS=Homo sapiens GN=SPAG9 PE=1 SV=4 - [JIP4_HUMAN]	O60271	S332	C-Jun-amino-terminal kinase-interacting protein 4 (JIP-4) (JNK-interacting protein 4) (Cancer/testis antigen 89) (CT89) (Human lung cancer oncogene 6 protein) (HLC-6) (JNK-associated leucine-zipper protein) (JLP) (Mitogen-activated protein kinase 8-interacting protein 4) (Proliferation-inducing protein 6) (Protein highly expressed in testis) (PHET) (Sperm surface protein) (Sperm-associated antige…	SPAG9 HSS KIAA0516 MAPK8IP4 SYD1 HLC6	TRNVSTGSAENEEKS	1.20048	0.263612	1.07443	0.103571	14000000	11700000	25700000	7.40993	112177	Other/CK2	CK2a2	NVSTGpSAENEEK	1	S(3): 0.0; T(4): 0.0; S(6): 100.0	144	Reverse	Class I
O60271	1	C-jun-amino-terminal kinase-interacting protein 4 OS=Homo sapiens GN=SPAG9 PE=1 SV=4 - [JIP4_HUMAN]	O60271	S730	C-Jun-amino-terminal kinase-interacting protein 4 (JIP-4) (JNK-interacting protein 4) (Cancer/testis antigen 89) (CT89) (Human lung cancer oncogene 6 protein) (HLC-6) (JNK-associated leucine-zipper protein) (JLP) (Mitogen-activated protein kinase 8-interacting protein 4) (Proliferation-inducing protein 6) (Protein highly expressed in testis) (PHET) (Sperm surface protein) (Sperm-associated antige…	SPAG9 HSS KIAA0516 MAPK8IP4 SYD1 HLC6	GSKQRSASQSSLDKL	1.01112	0.0159576	0.904954	-0.144083	32500000	32200000	64700000	7.8109	49017	Other/CK2	CK2a2	SApSQSSLDKLDQELK	1	S(1): 0.0; S(3): 100.0; S(5): 0.0; S(6): 0.0	309	Reverse	Class I
O60271	1	C-jun-amino-terminal kinase-interacting protein 4 OS=Homo sapiens GN=SPAG9 PE=1 SV=4 - [JIP4_HUMAN]	O60271	S732	C-Jun-amino-terminal kinase-interacting protein 4 (JIP-4) (JNK-interacting protein 4) (Cancer/testis antigen 89) (CT89) (Human lung cancer oncogene 6 protein) (HLC-6) (JNK-associated leucine-zipper protein) (JLP) (Mitogen-activated protein kinase 8-interacting protein 4) (Proliferation-inducing protein 6) (Protein highly expressed in testis) (PHET) (Sperm surface protein) (Sperm-associated antige…	SPAG9 HSS KIAA0516 MAPK8IP4 SYD1 HLC6	KQRSASQSSLDKLDQ	1.20048	0.263612	1.07443	0.103571	177000000	147000000	324000000	8.51055	110760	Other/CK2	CK2a2	SASQpSpSLDKLDQELK	2	S(1): 0.0; S(3): 1.9; S(5): 99.0; S(6): 99.0	124	Reverse	Class I
O60271	1	C-jun-amino-terminal kinase-interacting protein 4 OS=Homo sapiens GN=SPAG9 PE=1 SV=4 - [JIP4_HUMAN]	O60271	S733	C-Jun-amino-terminal kinase-interacting protein 4 (JIP-4) (JNK-interacting protein 4) (Cancer/testis antigen 89) (CT89) (Human lung cancer oncogene 6 protein) (HLC-6) (JNK-associated leucine-zipper protein) (JLP) (Mitogen-activated protein kinase 8-interacting protein 4) (Proliferation-inducing protein 6) (Protein highly expressed in testis) (PHET) (Sperm surface protein) (Sperm-associated antige…	SPAG9 HSS KIAA0516 MAPK8IP4 SYD1 HLC6	QRSASQSSLDKLDQE	0.924214	-0.1137	0.827172	-0.273741	126000000	136000000	262000000	8.4183	48879	Other/CK2	CK2a2	SASQSpSLDKLDQELK	1	S(1): 0.0; S(3): 0.0; S(5): 0.0; S(6): 100.0	368	Reverse	Class I
O60271	1	C-jun-amino-terminal kinase-interacting protein 4 OS=Homo sapiens GN=SPAG9 PE=1 SV=4 - [JIP4_HUMAN]	O60271	T217	C-Jun-amino-terminal kinase-interacting protein 4 (JIP-4) (JNK-interacting protein 4) (Cancer/testis antigen 89) (CT89) (Human lung cancer oncogene 6 protein) (HLC-6) (JNK-associated leucine-zipper protein) (JLP) (Mitogen-activated protein kinase 8-interacting protein 4) (Proliferation-inducing protein 6) (Protein highly expressed in testis) (PHET) (Sperm surface protein) (Sperm-associated antige…	SPAG9 HSS KIAA0516 MAPK8IP4 SYD1 HLC6	PAGDGLLTPDAQKGG	1.0989	0.136062	0.983516	-0.0239789	42000000	38200000	80200000	7.90417	56367	CMGC/MAPK	p38a	ERPISLGIFPLPAGDGLLpTPDAQK	1	S(5): 0.0; T(19): 100.0	377	Reverse	Class I
O60271	1	C-jun-amino-terminal kinase-interacting protein 4 OS=Homo sapiens GN=SPAG9 PE=1 SV=4 - [JIP4_HUMAN]	O60271	T330	C-Jun-amino-terminal kinase-interacting protein 4 (JIP-4) (JNK-interacting protein 4) (Cancer/testis antigen 89) (CT89) (Human lung cancer oncogene 6 protein) (HLC-6) (JNK-associated leucine-zipper protein) (JLP) (Mitogen-activated protein kinase 8-interacting protein 4) (Proliferation-inducing protein 6) (Protein highly expressed in testis) (PHET) (Sperm surface protein) (Sperm-associated antige…	SPAG9 HSS KIAA0516 MAPK8IP4 SYD1 HLC6	QETRNVSTGSAENEE	1.53374	0.617056	1.3727	0.457016	2800000	1820000	4620000	6.66464	107976	Other/CK2	CK2a2	NVSpTGSAENEEK	1	S(3): 1.0; T(4): 98.0; S(6): 1.0	106	Reverse	Class I
O60271	1	C-jun-amino-terminal kinase-interacting protein 4 OS=Homo sapiens GN=SPAG9 PE=1 SV=4 - [JIP4_HUMAN]	O60271	T365	C-Jun-amino-terminal kinase-interacting protein 4 (JIP-4) (JNK-interacting protein 4) (Cancer/testis antigen 89) (CT89) (Human lung cancer oncogene 6 protein) (HLC-6) (JNK-associated leucine-zipper protein) (JLP) (Mitogen-activated protein kinase 8-interacting protein 4) (Proliferation-inducing protein 6) (Protein highly expressed in testis) (PHET) (Sperm surface protein) (Sperm-associated antige…	SPAG9 HSS KIAA0516 MAPK8IP4 SYD1 HLC6	SGYKGSSTPTKGIEN	0.816327	-0.292782	0.730612	-0.452822	45900000	56300000	102200000	8.00945	46898			DLSGYKGSSpTPTK	1	S(3): 0.0; Y(5): 0.0; S(8): 0.0; S(9): 1.6; T(10): 98.4; T(12): 0.0	112	Reverse	Class I
O60271	1	C-jun-amino-terminal kinase-interacting protein 4 OS=Homo sapiens GN=SPAG9 PE=1 SV=4 - [JIP4_HUMAN]	O60271	T586	C-Jun-amino-terminal kinase-interacting protein 4 (JIP-4) (JNK-interacting protein 4) (Cancer/testis antigen 89) (CT89) (Human lung cancer oncogene 6 protein) (HLC-6) (JNK-associated leucine-zipper protein) (JLP) (Mitogen-activated protein kinase 8-interacting protein 4) (Proliferation-inducing protein 6) (Protein highly expressed in testis) (PHET) (Sperm surface protein) (Sperm-associated antige…	SPAG9 HSS KIAA0516 MAPK8IP4 SYD1 HLC6	NAPTSHVTPSVKKRS	1.13507	0.182786	1.01589	0.0227457	48100000	42400000	90500000	7.95665	134206	CMGC/CDK	CDK9	YNAPTSHVpTPSVK	1	Y(1): 0.0; T(5): 1.4; S(6): 1.4; T(9): 95.7; S(11): 1.4	62	Reverse	Class I
O60271	1	C-jun-amino-terminal kinase-interacting protein 4 OS=Homo sapiens GN=SPAG9 PE=1 SV=4 - [JIP4_HUMAN]	O60271	T595	C-Jun-amino-terminal kinase-interacting protein 4 (JIP-4) (JNK-interacting protein 4) (Cancer/testis antigen 89) (CT89) (Human lung cancer oncogene 6 protein) (HLC-6) (JNK-associated leucine-zipper protein) (JLP) (Mitogen-activated protein kinase 8-interacting protein 4) (Proliferation-inducing protein 6) (Protein highly expressed in testis) (PHET) (Sperm surface protein) (Sperm-associated antige…	SPAG9 HSS KIAA0516 MAPK8IP4 SYD1 HLC6	SVKKRSSTLSQLPGD	1.15875	0.212568	1.03708	0.0525271	28800000	24800000	53600000	7.72916	27082			SSpTLSQLPGDK	1	S(1): 0.0; S(2): 0.2; T(3): 99.6; S(5): 0.2	96	Reverse	Class I
O60281	1	Zinc finger protein 292 OS=Homo sapiens GN=ZNF292 PE=1 SV=2 - [ZN292_HUMAN]	O60281	S1873	Zinc finger protein 292	ZNF292 KIAA0530	KKGSHSNSRKNIDKT	38.4615	5.26534	34.4231	5.1053	11200000	289000	11489000	7.06028	83502			KGSHSNpSRK	1	S(3): 0.3; S(5): 5.1; S(7): 94.5	57	Reverse	Class I
O60285	1	NUAK family SNF1-like kinase 1 OS=Homo sapiens GN=NUAK1 PE=1 SV=1 - [NUAK1_HUMAN]	O60285	S455	NUAK family SNF1-like kinase 1 (EC 2.7.11.1) (AMPK-related protein kinase 5) (ARK5) (Omphalocele kinase 1)	NUAK1 ARK5 KIAA0537 OMPHK1	AEVPGKLSPKQSATM	0.956938	-0.0635029	0.856459	-0.223543	6470000	6760000	13230000	7.12156	125965	CMGC	CDKL2	TGVLLPSSPEAEVPGKLpSPK	1	T(1): 0.0; S(7): 0.0; S(8): 0.0; S(18): 100.0	187	Reverse	Class I
O60291	1	Probable E3 ubiquitin-protein ligase MGRN1 OS=Homo sapiens GN=MGRN1 PE=2 SV=2 - [MGRN1_HUMAN]	O60291	S524	E3 ubiquitin-protein ligase MGRN1 (EC 6.3.2.-) (Mahogunin RING finger protein 1) (RING finger protein 156)	MGRN1 KIAA0544 RNF156	ENVLQDSSPEHCGRG	1.23762	0.307573	1.10767	0.147532	1160000	937000	2097000	6.3216	131877			AASIENVLQDSpSPEHCGR	1	S(3): 0.0; S(11): 1.5; S(12): 98.5	108	Reverse	Class I
O60292	1	Signal-induced proliferation-associated 1-like protein 3 OS=Homo sapiens GN=SIPA1L3 PE=1 SV=3 - [SI1L3_HUMAN]	O60292	S100	Signal-induced proliferation-associated 1-like protein 3 (SIPA1-like protein 3) (SPA-1-like protein 3)	SIPA1L3 KIAA0545 SPAL3	LREHSNPSPSQDTDG	0.917431	-0.124328	0.821101	-0.284369	10700000	11600000	22300000	7.3483	164559			EALREHSNPpSPSQDTDGTK	1	S(7): 0.1; S(10): 99.1; S(12): 0.8; T(15): 0.0; T(18): 0.0	143	Reverse	Class I
O60292	1	Signal-induced proliferation-associated 1-like protein 3 OS=Homo sapiens GN=SIPA1L3 PE=1 SV=3 - [SI1L3_HUMAN]	O60292	S1364	Signal-induced proliferation-associated 1-like protein 3 (SIPA1-like protein 3) (SPA-1-like protein 3)	SIPA1L3 KIAA0545 SPAL3	ADRRREVSPAPAVAG	0.921659	-0.117695	0.824885	-0.277735	68600000	74400000	143000000	8.15534	22274			EVpSPAPAVAGQSK	1	S(3): 100.0; S(12): 0.0	250	Reverse	Class I
O60292	1	Signal-induced proliferation-associated 1-like protein 3 OS=Homo sapiens GN=SIPA1L3 PE=1 SV=3 - [SI1L3_HUMAN]	O60292	S1544	Signal-induced proliferation-associated 1-like protein 3 (SIPA1-like protein 3) (SPA-1-like protein 3)	SIPA1L3 KIAA0545 SPAL3	KGLQRTLSDESLCSG	0.99108	-0.0129262	0.887017	-0.172967	26200000	26500000	52700000	7.72181	26805			TLpSDESLCSGR	1	T(1): 0.0; S(3): 100.0; S(6): 0.0; S(9): 0.0	94	Reverse	Class I
O60292	1	Signal-induced proliferation-associated 1-like protein 3 OS=Homo sapiens GN=SIPA1L3 PE=1 SV=3 - [SI1L3_HUMAN]	O60292	S1547	Signal-induced proliferation-associated 1-like protein 3 (SIPA1-like protein 3) (SPA-1-like protein 3)	SIPA1L3 KIAA0545 SPAL3	QRTLSDESLCSGRRE	1.44092	0.526992	1.28963	0.366952	4430000	3080000	7510000	6.87564	31557			TLpSDEpSLCSGRR	2	T(1): 0.4; S(3): 99.6; S(6): 94.5; S(9): 5.5	108	Reverse	Class I
O60292	1	Signal-induced proliferation-associated 1-like protein 3 OS=Homo sapiens GN=SIPA1L3 PE=1 SV=3 - [SI1L3_HUMAN]	O60292	S158	Signal-induced proliferation-associated 1-like protein 3 (SIPA1-like protein 3) (SPA-1-like protein 3)	SIPA1L3 KIAA0545 SPAL3	FQDGWPRSPGRAFLP	0.895255	-0.159629	0.801253	-0.31967	15500000	17300000	32800000	7.51587	125905			DVEFQDGWPRpSPGR	1	S(11): 100.0	182	Reverse	Class I
O60292	1	Signal-induced proliferation-associated 1-like protein 3 OS=Homo sapiens GN=SIPA1L3 PE=1 SV=3 - [SI1L3_HUMAN]	O60292	S172	Signal-induced proliferation-associated 1-like protein 3 (SIPA1-like protein 3) (SPA-1-like protein 3)	SIPA1L3 KIAA0545 SPAL3	PLRHRSSSEITLSEC	1.08932	0.123434	0.974946	-0.0366065	17800000	16300000	34100000	7.53275	14581			SSpSEITLSECDAEDAGEPR	1	S(1): 0.0; S(2): 0.0; S(3): 100.0; T(6): 0.0; S(8): 0.0	289	Reverse	Class I
O60292	1	Signal-induced proliferation-associated 1-like protein 3 OS=Homo sapiens GN=SIPA1L3 PE=1 SV=3 - [SI1L3_HUMAN]	O60292	S401	Signal-induced proliferation-associated 1-like protein 3 (SIPA1-like protein 3) (SPA-1-like protein 3)	SIPA1L3 KIAA0545 SPAL3	GLDPAFTSTEDLNCK	1.43266	0.518701	1.28223	0.358661	11400000	7940000	19340000	7.28646	61522			AHSLGGLDPAFTpSTEDLNCK	1	S(3): 0.0; T(12): 0.4; S(13): 99.2; T(14): 0.4	350	Reverse	Class I
O60292	1	Signal-induced proliferation-associated 1-like protein 3 OS=Homo sapiens GN=SIPA1L3 PE=1 SV=3 - [SI1L3_HUMAN]	O60292	T1063	Signal-induced proliferation-associated 1-like protein 3 (SIPA1-like protein 3) (SPA-1-like protein 3)	SIPA1L3 KIAA0545 SPAL3	MNTSEPKTEQESITP	1.16144	0.215915	1.03949	0.0558744	963000	830000	1793000	6.25358	170148			pTEQESITPGGRPPYR	1	T(1): 99.7; S(5): 0.3; T(7): 0.0; Y(14): 0.0	54	Reverse	Class I
O60292	1	Signal-induced proliferation-associated 1-like protein 3 OS=Homo sapiens GN=SIPA1L3 PE=1 SV=3 - [SI1L3_HUMAN]	O60292	T1703	Signal-induced proliferation-associated 1-like protein 3 (SIPA1-like protein 3) (SPA-1-like protein 3)	SIPA1L3 KIAA0545 SPAL3	GPPTPRTTPTMSEEP	1.05485	0.077041	0.944093	-0.0829994	11500000	10900000	22400000	7.35025	19389			TpTPTMSEEPPLDLTGK	1	T(1): 5.3; T(2): 89.5; T(4): 5.3; S(6): 0.0; T(14): 0.0	122	Reverse	Class I
O60293	1	Coiled-coil domain-containing protein 131 OS=Homo sapiens GN=CCDC131 PE=1 SV=3 - [CC131_HUMAN]	O60293	S1303	Zinc finger C3H1 domain-containing protein (Coiled-coil domain-containing protein 131) (Proline/serine-rich coiled-coil protein 2)	ZFC3H1 CCDC131 KIAA0546 PSRC2	PISDNSFSSDEEQST	1.2837	0.360305	1.14891	0.200264	24600000	19200000	43800000	7.64147	135021			KPISDNSFpSSDEEQSTGPIK	1	S(4): 0.7; S(7): 0.7; S(9): 98.0; S(10): 0.7; S(15): 0.0; T(16): 0.0	194	Reverse	Class I
O60293	1	Coiled-coil domain-containing protein 131 OS=Homo sapiens GN=CCDC131 PE=1 SV=3 - [CC131_HUMAN]	O60293	S1304	Zinc finger C3H1 domain-containing protein (Coiled-coil domain-containing protein 131) (Proline/serine-rich coiled-coil protein 2)	ZFC3H1 CCDC131 KIAA0546 PSRC2	ISDNSFSSDEEQSTG	0.874891	-0.192825	0.783027	-0.352866	5190000	5930000	11120000	7.0461	37366			KPISDNSFpSpSDEEQSTGPIK	2	S(4): 0.0; S(7): 0.0; S(9): 100.0; S(10): 100.0; S(15): 0.0; T(16): 0.0	174	Reverse	Class I
O60293	1	Coiled-coil domain-containing protein 131 OS=Homo sapiens GN=CCDC131 PE=1 SV=3 - [CC131_HUMAN]	O60293	S352	Zinc finger C3H1 domain-containing protein (Coiled-coil domain-containing protein 131) (Proline/serine-rich coiled-coil protein 2)	ZFC3H1 CCDC131 KIAA0546 PSRC2	QNLTRRISTSDILSE	0.772798	-0.371838	0.691654	-0.531878	11700000	15200000	26900000	7.42975	55244			RIpSTSDILSEK	1	S(3): 99.2; T(4): 0.4; S(5): 0.4; S(9): 0.0	83	Reverse	Class I
O60293	1	Coiled-coil domain-containing protein 131 OS=Homo sapiens GN=CCDC131 PE=1 SV=3 - [CC131_HUMAN]	O60293	S805	Zinc finger C3H1 domain-containing protein (Coiled-coil domain-containing protein 131) (Proline/serine-rich coiled-coil protein 2)	ZFC3H1 CCDC131 KIAA0546 PSRC2	QLKTSSSSPANSDVE	1.22699	0.295128	1.09816	0.135088	1030000	842000	1872000	6.27231	117139			TSSSpSPANSDVEIDGIGR	1	T(1): 0.0; S(2): 0.2; S(3): 0.2; S(4): 3.8; S(5): 95.9; S(9): 0.0	166	Reverse	Class I
O60293	1	Coiled-coil domain-containing protein 131 OS=Homo sapiens GN=CCDC131 PE=1 SV=3 - [CC131_HUMAN]	O60293	S809	Zinc finger C3H1 domain-containing protein (Coiled-coil domain-containing protein 131) (Proline/serine-rich coiled-coil protein 2)	ZFC3H1 CCDC131 KIAA0546 PSRC2	SSSSPANSDVEIDGI	1.42045	0.506353	1.27131	0.346312	6260000	4410000	10670000	7.02816	97165			TSSSpSPANpSDVEIDGIGR	2	T(1): 0.0; S(2): 0.0; S(3): 0.0; S(4): 0.1; S(5): 99.9; S(9): 100.0	190	Reverse	Class I
O60293	1	Coiled-coil domain-containing protein 131 OS=Homo sapiens GN=CCDC131 PE=1 SV=3 - [CC131_HUMAN]	O60293	S949	Zinc finger C3H1 domain-containing protein (Coiled-coil domain-containing protein 131) (Proline/serine-rich coiled-coil protein 2)	ZFC3H1 CCDC131 KIAA0546 PSRC2	KMMRLDSSPVSSPRK	1.29032	0.367732	1.15484	0.207691	18400000	14300000	32700000	7.51455	22277			LDSpSPVSSPR	1	S(3): 0.5; S(4): 99.5; S(7): 0.0; S(8): 0.0	177	Reverse	Class I
O60303	1	Uncharacterized protein KIAA0556 OS=Homo sapiens GN=KIAA0556 PE=2 SV=3 - [K0556_HUMAN]	O60303	S660	Uncharacterized protein KIAA0556	KIAA0556	KELGLGCSPPAETLA	1.27065	0.345564	1.13723	0.185524	7980000	6280000	14260000	7.15412	29115			ELGLGCpSPPAETLADAK	1	S(7): 99.9; T(12): 0.1	104	Reverse	Class I
O60303	1	Uncharacterized protein KIAA0556 OS=Homo sapiens GN=KIAA0556 PE=2 SV=3 - [K0556_HUMAN]	O60303	S691	Uncharacterized protein KIAA0556	KIAA0556	STNCRKDSLSQLEEY	1.87617	0.907793	1.67917	0.747752	2890000	1540000	4430000	6.6464	136188			KDpSLSQLEEYLR	1	S(3): 100.0; S(5): 0.0; Y(10): 0.0	149	Reverse	Class I
O60315	1	Zinc finger E-box-binding homeobox 2 OS=Homo sapiens GN=ZEB2 PE=1 SV=1 - [ZEB2_HUMAN]	O60315	S353	Zinc finger E-box-binding homeobox 2 (Smad-interacting protein 1) (SMADIP1) (Zinc finger homeobox protein 1b)	ZEB2 KIAA0569 SIP1 ZFHX1B ZFX1B HRIHFB2411	NNIKTGSSPNSVSSS	1.0582	0.0816138	0.94709	-0.0784266	11500000	10900000	22400000	7.35025	24101			TGSpSPNSVSSSPTNSAITQLR	1	T(1): 0.0; S(3): 0.0; S(4): 100.0; S(7): 0.0; S(9): 0.0; S(10): 0.0; S(11): 0.0; T(13): 0.0; S(15): 0.0; T(18): 0.0	227	Reverse	Class I
O60315	1	Zinc finger E-box-binding homeobox 2 OS=Homo sapiens GN=ZEB2 PE=1 SV=1 - [ZEB2_HUMAN]	O60315	S705	Zinc finger E-box-binding homeobox 2 (Smad-interacting protein 1) (SMADIP1) (Zinc finger homeobox protein 1b)	ZEB2 KIAA0569 SIP1 ZFHX1B ZFX1B HRIHFB2411	YQYSNSRSPSLERSS	1.03842	0.0543923	0.929387	-0.105648	21200000	20400000	41600000	7.61909	60383			VYQYSNSRpSPSLER	1	Y(2): 0.0; Y(4): 0.0; S(5): 0.0; S(7): 0.0; S(9): 100.0; S(11): 0.0	253	Reverse	Class I
O60315	1	Zinc finger E-box-binding homeobox 2 OS=Homo sapiens GN=ZEB2 PE=1 SV=1 - [ZEB2_HUMAN]	O60315	T782	Zinc finger E-box-binding homeobox 2 (Smad-interacting protein 1) (SMADIP1) (Zinc finger homeobox protein 1b)	ZEB2 KIAA0569 SIP1 ZFHX1B ZFX1B HRIHFB2411	LDHSRSNTPSPLNLS	0.806452	-0.31034	0.721774	-0.470381	8210000	10200000	18410000	7.26505	116994	CMGC/GSK	GSK3A	SNpTPSPLNLSSTSSK	1	S(1): 9.8; T(3): 80.5; S(5): 9.8; S(10): 0.0; S(11): 0.0; T(12): 0.0; S(13): 0.0; S(14): 0.0	59	Reverse	Class I
O60318	1	80 kDa MCM3-associated protein OS=Homo sapiens GN=MCM3AP PE=1 SV=2 - [MCM3A_HUMAN]	O60318	S527	80 kDa MCM3-associated protein (Protein GANP)	MCM3AP GANP KIAA0572 MAP80	KPGDGEVSPSTEDAP	1.0929	0.128156	0.978142	-0.0318841	6740000	6170000	12910000	7.11093	63706			KPGDGEVpSPSTEDAPFQHSPLGK	1	S(8): 98.1; S(10): 0.9; T(11): 0.9; S(19): 0.0	117	Reverse	Class I
O60333	1	Kinesin-like protein KIF1B OS=Homo sapiens GN=KIF1B PE=1 SV=5 - [KIF1B_HUMAN]	O60333	S1057	Kinesin-like protein KIF1B (Klp)	KIF1B KIAA0591 KIAA1448	AMTRSGLSLEELRIV	1.24844	0.320126	1.11735	0.160085	84100000	67400000	151500000	8.18041	119223			SGLpSLEELR	1	S(1): 0.0; S(4): 100.0	91	Reverse	Class I
O60333	1	Kinesin-like protein KIF1B OS=Homo sapiens GN=KIF1B PE=1 SV=5 - [KIF1B_HUMAN]	O60333	S1454	Kinesin-like protein KIF1B (Klp)	KIF1B KIAA0591 KIAA1448	CKMSDTGSPGMQRRR	0.8285	-0.271426	0.741508	-0.431466	9340000	11300000	20640000	7.31471	21965			MSDTGpSPGMQR	1	S(2): 0.0; T(4): 0.6; S(6): 99.4	157	Reverse	Class I
O60333	1	Kinesin-like protein KIF1B OS=Homo sapiens GN=KIF1B PE=1 SV=5 - [KIF1B_HUMAN]	O60333	S1487	Kinesin-like protein KIF1B (Klp)	KIF1B KIAA0591 KIAA1448	GWRPRGDSLILEHQW	0.851064	-0.232661	0.761702	-0.392701	20100000	23600000	43700000	7.64048	45946			GDpSLILEHQWELEK	1	S(3): 100.0	287	Reverse	Class I
O60336	1	Mitogen-activated protein kinase-binding protein 1 OS=Homo sapiens GN=MAPKBP1 PE=2 SV=3 - [MABP1_HUMAN]	O60336	S1096	Mitogen-activated protein kinase-binding protein 1 (JNK-binding protein 1) (JNKBP-1)	MAPKBP1 JNKBP1 KIAA0596	PERSESRSISSRFLL	11.1111	3.47393	9.94444	3.31389	102000000	9180000	111180000	8.04603	49471			pSISSRFLLQVQpTRPLR	2	S(1): 99.9; S(3): 0.1; S(4): 0.0; T(12): 100.0	95	Reverse	Class I
O60336	1	Mitogen-activated protein kinase-binding protein 1 OS=Homo sapiens GN=MAPKBP1 PE=2 SV=3 - [MABP1_HUMAN]	O60336	S1198	Mitogen-activated protein kinase-binding protein 1 (JNK-binding protein 1) (JNKBP-1)	MAPKBP1 JNKBP1 KIAA0596	SGLQKAQSVHSLVPQ	0.855432	-0.225275	0.765612	-0.385315	10600000	12400000	23000000	7.36173	134952			AQpSVHSLVPQER	1	S(3): 100.0; S(6): 0.0	111	Reverse	Class I
O60336	1	Mitogen-activated protein kinase-binding protein 1 OS=Homo sapiens GN=MAPKBP1 PE=2 SV=3 - [MABP1_HUMAN]	O60336	S18	Mitogen-activated protein kinase-binding protein 1 (JNK-binding protein 1) (JNKBP-1)	MAPKBP1 JNKBP1 KIAA0596	RIKNLLRSPSIKLRR	1.09649	0.132894	0.98136	-0.0271461	28200000	25700000	53900000	7.73159	160054			NLLRpSPSIK	1	S(5): 100.0; S(7): 0.0	90	Reverse	Class I
O60336	1	Mitogen-activated protein kinase-binding protein 1 OS=Homo sapiens GN=MAPKBP1 PE=2 SV=3 - [MABP1_HUMAN]	O60336	S819	Mitogen-activated protein kinase-binding protein 1 (JNK-binding protein 1) (JNKBP-1)	MAPKBP1 JNKBP1 KIAA0596	KALASVPSPALPRSL	0.510204	-0.970854	0.456633	-1.13089	6170000	12100000	18270000	7.26174	118162			ALASVPpSPALPR	1	S(4): 0.0; S(7): 100.0	121	Reverse	Class I
O60336	1	Mitogen-activated protein kinase-binding protein 1 OS=Homo sapiens GN=MAPKBP1 PE=2 SV=3 - [MABP1_HUMAN]	O60336	T1107	Mitogen-activated protein kinase-binding protein 1 (JNK-binding protein 1) (JNKBP-1)	MAPKBP1 JNKBP1 KIAA0596	RFLLQVQTRPLREPS	11.1111	3.47393	9.94444	3.31389	102000000	9180000	111180000	8.04603	49471			pSISSRFLLQVQpTRPLR	2	S(1): 99.9; S(3): 0.1; S(4): 0.0; T(12): 100.0	95	Reverse	Class I
O60341	1	Lysine-specific histone demethylase 1 OS=Homo sapiens GN=AOF2 PE=1 SV=2 - [LSD1_HUMAN]	O60341	S131	Lysine-specific histone demethylase 1A (EC 1.-.-.-) (BRAF35-HDAC complex protein BHC110) (Flavin-containing amine oxidase domain-containing protein 2)	KDM1A AOF2 KDM1 KIAA0601 LSD1	DESLANLSEDEYYSE	1.14679	0.1976	1.02638	0.0375595	121000000	106000000	227000000	8.35603	28652			EMDESLANLpSEDEYYpSEEERNAK	2	S(5): 0.1; S(10): 99.2; Y(14): 3.2; Y(15): 2.8; S(16): 94.6	61	Reverse	Class I
O60341	1	Lysine-specific histone demethylase 1 OS=Homo sapiens GN=AOF2 PE=1 SV=2 - [LSD1_HUMAN]	O60341	S137	Lysine-specific histone demethylase 1A (EC 1.-.-.-) (BRAF35-HDAC complex protein BHC110) (Flavin-containing amine oxidase domain-containing protein 2)	KDM1A AOF2 KDM1 KIAA0601 LSD1	LSEDEYYSEEERNAK	1.14679	0.1976	1.02638	0.0375595	121000000	106000000	227000000	8.35603	28652			EMDESLANLpSEDEYYpSEEERNAK	2	S(5): 0.1; S(10): 99.2; Y(14): 3.2; Y(15): 2.8; S(16): 94.6	61	Reverse	Class I
O60341	1	Lysine-specific histone demethylase 1 OS=Homo sapiens GN=AOF2 PE=1 SV=2 - [LSD1_HUMAN]	O60341	S849	Lysine-specific histone demethylase 1A (EC 1.-.-.-) (BRAF35-HDAC complex protein BHC110) (Flavin-containing amine oxidase domain-containing protein 2)	KDM1A AOF2 KDM1 KIAA0601 LSD1	PGVPAQQSPSM****	1.17096	0.227692	1.04801	0.0676516	37500000	32100000	69600000	7.84261	95365	CMGC/MAPK	Erk1, Erk2	QATPGVPAQQpSPSM	1	T(3): 0.0; S(11): 100.0; S(13): 0.0	142	Reverse	Class I
O60341	1	Lysine-specific histone demethylase 1 OS=Homo sapiens GN=AOF2 PE=1 SV=2 - [LSD1_HUMAN]	O60341	T841	Lysine-specific histone demethylase 1A (EC 1.-.-.-) (BRAF35-HDAC complex protein BHC110) (Flavin-containing amine oxidase domain-containing protein 2)	KDM1A AOF2 KDM1 KIAA0601 LSD1	YTLPRQATPGVPAQQ	1.11235	0.153607	0.995551	-0.00643343	5480000	4930000	10410000	7.01745	95342			QApTPGVPAQQSPSM	1	T(3): 100.0; S(11): 0.0; S(13): 0.0	167	Reverse	Class I
O60343	1	TBC1 domain family member 4 OS=Homo sapiens GN=TBC1D4 PE=1 SV=2 - [TBCD4_HUMAN]	O60343	S314	TBC1 domain family member 4 (Akt substrate of 160 kDa) (AS160)	TBC1D4 AS160 KIAA0603	DEQQEFRSRCSSVTG	1.4881	0.573467	1.33185	0.413426	8490000	5710000	14200000	7.15229	55565			ILEDSGFDEQQEFRpSR	1	S(5): 0.0; S(15): 100.0	263	Reverse	Class I
O60343	1	TBC1 domain family member 4 OS=Homo sapiens GN=TBC1D4 PE=1 SV=2 - [TBCD4_HUMAN]	O60343	S317	TBC1 domain family member 4 (Akt substrate of 160 kDa) (AS160)	TBC1D4 AS160 KIAA0603	QEFRSRCSSVTGVQR	2.10526	1.074	1.88421	0.91396	3050000	1450000	4500000	6.65321	21866			CpSSVTGVQR	1	S(2): 99.5; S(3): 0.5; T(5): 0.0	91	Reverse	Class I
O60343	1	TBC1 domain family member 4 OS=Homo sapiens GN=TBC1D4 PE=1 SV=2 - [TBCD4_HUMAN]	O60343	S318	TBC1 domain family member 4 (Akt substrate of 160 kDa) (AS160)	TBC1D4 AS160 KIAA0603	EFRSRCSSVTGVQRR	2.15054	1.1047	1.92473	0.944657	42300000	19700000	62000000	7.79239	112485	AGC/SGK	SGK1	CSpSVTGVQR	1	S(2): 0.6; S(3): 99.3; T(5): 0.1	59	Reverse	Class I
O60343	1	TBC1 domain family member 4 OS=Homo sapiens GN=TBC1D4 PE=1 SV=2 - [TBCD4_HUMAN]	O60343	S341	TBC1 domain family member 4 (Akt substrate of 160 kDa) (AS160)	TBC1D4 AS160 KIAA0603	QPRRRHASAPSHVQP	1.36054	0.444184	1.21769	0.284143	554000000	407000000	961000000	8.98272	72275	AGC/SGK	SGK1	HApSAPSHVQPSDSEK	1	S(3): 100.0; S(6): 0.0; S(11): 0.0; S(13): 0.0	343	Reverse	Class I
O60343	1	TBC1 domain family member 4 OS=Homo sapiens GN=TBC1D4 PE=1 SV=2 - [TBCD4_HUMAN]	O60343	S566	TBC1 domain family member 4 (Akt substrate of 160 kDa) (AS160)	TBC1D4 AS160 KIAA0603	LKNKAKRSLTSSLEN	1.5456	0.628162	1.38331	0.468122	1660000	1070000	2730000	6.43616	170566	AGC/PKG	PKG1, PKG2	RpSLTSSLENIFSR	1	S(2): 96.7; T(4): 1.1; S(5): 1.1; S(6): 1.1; S(12): 0.0	62	Reverse	Class I
O60343	1	TBC1 domain family member 4 OS=Homo sapiens GN=TBC1D4 PE=1 SV=2 - [TBCD4_HUMAN]	O60343	S570	TBC1 domain family member 4 (Akt substrate of 160 kDa) (AS160)	TBC1D4 AS160 KIAA0603	AKRSLTSSLENIFSR	1.49254	0.577767	1.33582	0.417727	117000000	78400000	195400000	8.29092	30433	AGC/SGK	SGK1	SLTSpSLENIFSR	1	S(1): 0.0; T(3): 0.1; S(4): 2.1; S(5): 97.8; S(11): 0.0	122	Reverse	Class I
O60343	1	TBC1 domain family member 4 OS=Homo sapiens GN=TBC1D4 PE=1 SV=2 - [TBCD4_HUMAN]	O60343	S588	TBC1 domain family member 4 (Akt substrate of 160 kDa) (AS160)	TBC1D4 AS160 KIAA0603	RMRGRLGSVDSFERS	1.51515	0.599462	1.35606	0.439422	663000000	437000000	1100000000	9.04139	117456	AGC/SGK	SGK1	LGpSVDSFER	1	S(3): 100.0; S(6): 0.0	124	Reverse	Class I
O60343	1	TBC1 domain family member 4 OS=Homo sapiens GN=TBC1D4 PE=1 SV=2 - [TBCD4_HUMAN]	O60343	S591	TBC1 domain family member 4 (Akt substrate of 160 kDa) (AS160)	TBC1D4 AS160 KIAA0603	GRLGSVDSFERSNSL	0.655738	-0.608809	0.586885	-0.76885	43900000	66900000	110800000	8.04454	117304			LGSVDpSFER	1	S(3): 0.0; S(6): 100.0	74	Reverse	Class I
O60343	1	TBC1 domain family member 4 OS=Homo sapiens GN=TBC1D4 PE=1 SV=2 - [TBCD4_HUMAN]	O60343	S666	TBC1 domain family member 4 (Akt substrate of 160 kDa) (AS160)	TBC1D4 AS160 KIAA0603	GRAQGVRSPLLRQSS	1.06838	0.0954196	0.956197	-0.0646208	168000000	158000000	326000000	8.51322	60374	Atypical/PIKK/FRAP	FRAP	AQGVRpSPLLR	1	S(6): 100.0	236	Reverse	Class I
O60343	1	TBC1 domain family member 4 OS=Homo sapiens GN=TBC1D4 PE=1 SV=2 - [TBCD4_HUMAN]	O60343	S751	TBC1 domain family member 4 (Akt substrate of 160 kDa) (AS160)	TBC1D4 AS160 KIAA0603	EGRKRTSSTCSNESL	1.22549	0.293359	1.09681	0.133319	48500000	39600000	88100000	7.94498	97126	AGC/SGK	SGK1	TSpSTCpSNESLSVGGTSVTPR	2	T(1): 0.0; S(2): 0.0; S(3): 100.0; T(4): 0.0; S(6): 100.0; S(9): 0.0; S(11): 0.0; T(15): 0.0; S(16): 0.0; T(18): 0.0	295	Reverse	Class I
O60343	1	TBC1 domain family member 4 OS=Homo sapiens GN=TBC1D4 PE=1 SV=2 - [TBCD4_HUMAN]	O60343	S754	TBC1 domain family member 4 (Akt substrate of 160 kDa) (AS160)	TBC1D4 AS160 KIAA0603	KRTSSTCSNESLSVG	1.22549	0.293359	1.09681	0.133319	48500000	39600000	88100000	7.94498	97126	AGC/SGK	SGK1	TSpSTCpSNESLSVGGTSVTPR	2	T(1): 0.0; S(2): 0.0; S(3): 100.0; T(4): 0.0; S(6): 100.0; S(9): 0.0; S(11): 0.0; T(15): 0.0; S(16): 0.0; T(18): 0.0	295	Reverse	Class I
O60343	1	TBC1 domain family member 4 OS=Homo sapiens GN=TBC1D4 PE=1 SV=2 - [TBCD4_HUMAN]	O60343	T642	TBC1 domain family member 4 (Akt substrate of 160 kDa) (AS160)	TBC1D4 AS160 KIAA0603	QFRRRAHTFSHPPSS	2.17865	1.12343	1.94989	0.963394	186000000	85100000	271100000	8.43313	77913	AGC/AKT	AKT1, AKT2	AHpTFSHPPSSTK	1	T(3): 100.0; S(5): 0.0; S(9): 0.0; S(10): 0.0; T(11): 0.0	197	Reverse	Class I
O60353	1	Frizzled-6 OS=Homo sapiens GN=FZD6 PE=2 SV=1 - [FZD6_HUMAN]	O60353	S620	Frizzled-6 (Fz-6) (hFz6)	FZD6	QDCGEPASPAASISR	1.57729	0.657445	1.41167	0.497405	12900000	8200000	21100000	7.32428	60342	CMGC/MAPK	Erk1	LREQDCGEPApSPAASISR	1	S(11): 100.0; S(15): 0.0; S(17): 0.0	219	Reverse	Class I
O60381	1	HMG box-containing protein 1 OS=Homo sapiens GN=HBP1 PE=1 SV=2 - [HBP1_HUMAN]	O60381	S380	HMG box-containing protein 1 (HMG box transcription factor 1) (High mobility group box transcription factor 1)	HBP1	MARQRRASLSCGGPG	1.68634	0.753896	1.50927	0.593856	7480000	4440000	11920000	7.07628	60469			RApSLSCGGPGGQDFAR	1	S(3): 100.0; S(5): 0.0	302	Reverse	Class I
O60443	1	Non-syndromic hearing impairment protein 5 OS=Homo sapiens GN=DFNA5 PE=2 SV=2 - [DFNA5_HUMAN]	O60443	S252	Non-syndromic hearing impairment protein 5 (Inversely correlated with estrogen receptor expression 1) (ICERE-1)	DFNA5 ICERE1	ENKKRIDSVYLDPLV	1.443	0.529073	1.29149	0.369032	6730000	4660000	11390000	7.05652	136429			RIDpSVYLDPLVFR	1	S(4): 100.0; Y(6): 0.0	144	Reverse	Class I
O60487	1	Myelin protein zero-like protein 2 OS=Homo sapiens GN=MPZL2 PE=2 SV=1 - [MPZL2_HUMAN]	O60487	S208	Myelin protein zero-like protein 2 (Epithelial V-like antigen 1)	MPZL2 EVA EVA1 UNQ606/PRO1192	LNQEKKVSVYLEDTD	1.65837	0.72977	1.48425	0.56973	11300000	6810000	18110000	7.25792	110341			KVpSVYLEDTD	1	S(3): 100.0; Y(5): 0.0; T(9): 0.0	108	Reverse	Class I
O60487	1	Myelin protein zero-like protein 2 OS=Homo sapiens GN=MPZL2 PE=2 SV=1 - [MPZL2_HUMAN]	O60487	T214	Myelin protein zero-like protein 2 (Epithelial V-like antigen 1)	MPZL2 EVA EVA1 UNQ606/PRO1192	VSVYLEDTD******	1.3089	0.388355	1.17147	0.228315	26000000	19900000	45900000	7.66181	37393			KVSVYLEDpTD	1	S(3): 0.0; Y(5): 0.0; T(9): 100.0	113	Reverse	Class I
O60488	1	Long-chain-fatty-acid--CoA ligase 4 OS=Homo sapiens GN=ACSL4 PE=1 SV=2 - [ACSL4_HUMAN]	O60488	S57	Long-chain-fatty-acid--CoA ligase 4 (EC 6.2.1.3) (Long-chain acyl-CoA synthetase 4) (LACS 4)	ACSL4 ACS4 FACL4 LACS4	PTSDKPGSPYRSVTH	0.809717	-0.304511	0.724696	-0.464551	1240000	1530000	2770000	6.44248	168140			AKPTSDKPGpSPYR	1	T(4): 0.6; S(5): 0.6; S(10): 98.2; Y(12): 0.6	59	Reverse	Class I
O60488	1	Long-chain-fatty-acid--CoA ligase 4 OS=Homo sapiens GN=ACSL4 PE=1 SV=2 - [ACSL4_HUMAN]	O60488	T679	Long-chain-fatty-acid--CoA ligase 4 (EC 6.2.1.3) (Long-chain acyl-CoA synthetase 4) (LACS 4)	ACSL4 ACS4 FACL4 LACS4	RLSPEPWTPETGLVT	1.17371	0.231075	1.05047	0.0710343	267000	227000	494000	5.69373	132527			VRLSPEPWpTPETGLVTDAFK	1	S(4): 0.5; T(9): 99.5; T(12): 0.0; T(16): 0.0	98	Reverse	Class I
O60502	1	Bifunctional protein NCOAT OS=Homo sapiens GN=MGEA5 PE=1 SV=2 - [NCOAT_HUMAN]	O60502	S364	Bifunctional protein NCOAT (Meningioma-expressed antigen 5) (Nuclear cytoplasmic O-GlcNAcase and acetyltransferase) [Includes: Protein O-GlcNAcase (EC 3.2.1.169) (Glycoside hydrolase O-GlcNAcase) (Hexosaminidase C) (N-acetyl-beta-D-glucosaminidase) (N-acetyl-beta-glucosaminidase) (O-GlcNAcase) (OGA); Histone acetyltransferase (HAT) (EC 2.3.1.48)]	MGEA5 HEXC KIAA0679 MEA5	IKLENEGSDEDIETD	1.31406	0.394032	1.17608	0.233991	79000000	60100000	139100000	8.14333	20920			LENEGpSDEDIETDVLYSPQMALK	1	S(6): 100.0; T(12): 0.0; Y(16): 0.0; S(17): 0.0	76	Reverse	Class I
O60504	1	Vinexin OS=Homo sapiens GN=SORBS3 PE=1 SV=1 - [VINEX_HUMAN]	O60504	S395	Vinexin (SH3-containing adapter molecule 1) (SCAM-1) (Sorbin and SH3 domain-containing protein 3)	SORBS3 SCAM1	KFDFQAQSPKELTLQ	1.66945	0.739372	1.49416	0.579332	4620000	2770000	7390000	6.86864	28046	CMGC/MAPK	Erk1, Erk2	FDFQAQpSPK	1	S(7): 100.0	103	Reverse	Class I
O60504	1	Vinexin OS=Homo sapiens GN=SORBS3 PE=1 SV=1 - [VINEX_HUMAN]	O60504	S530	Vinexin (SH3-containing adapter molecule 1) (SCAM-1) (Sorbin and SH3 domain-containing protein 3)	SORBS3 SCAM1	DGPQLPTSPRLTAAA	1.05597	0.0785637	0.94509	-0.0814767	953000000	903000000	1856000000	9.26858	27547	CMGC/MAPK	Erk1, Erk2	LCDDGPQLPTpSPR	1	T(10): 1.9; S(11): 98.1	156	Reverse	Class I
O60504	1	Vinexin OS=Homo sapiens GN=SORBS3 PE=1 SV=1 - [VINEX_HUMAN]	O60504	S544	Vinexin (SH3-containing adapter molecule 1) (SCAM-1) (Sorbin and SH3 domain-containing protein 3)	SORBS3 SCAM1	ARSARHPSSPSALRS	1.0101	0.0144996	0.90404	-0.145541	17900000	17700000	35600000	7.55145	138868	CAMK/CAMK2	CaMK2d, CaMK2g	HPpSSPSALR	1	S(3): 98.8; S(4): 1.2; S(6): 0.0	73	Reverse	Class I
O60504	1	Vinexin OS=Homo sapiens GN=SORBS3 PE=1 SV=1 - [VINEX_HUMAN]	O60504	S545	Vinexin (SH3-containing adapter molecule 1) (SCAM-1) (Sorbin and SH3 domain-containing protein 3)	SORBS3 SCAM1	RSARHPSSPSALRSP	0.909091	-0.137504	0.813636	-0.297544	47000000	51700000	98700000	7.99432	68514	CMGC/MAPK	Erk1, Erk2	HPSpSPSALRSPADPTDLGGQTSPR	1	S(3): 1.6; S(4): 96.7; S(6): 1.6; S(10): 0.0; T(15): 0.0; T(21): 0.0; S(22): 0.0	164	Reverse	Class I
O60504	1	Vinexin OS=Homo sapiens GN=SORBS3 PE=1 SV=1 - [VINEX_HUMAN]	O60504	S563	Vinexin (SH3-containing adapter molecule 1) (SCAM-1) (Sorbin and SH3 domain-containing protein 3)	SORBS3 SCAM1	TDLGGQTSPRRTGFS	1.10254	0.140826	0.98677	-0.0192149	714000000	648000000	1362000000	9.13418	26590	CMGC/MAPK	Erk1, Erk2	SPADPTDLGGQTpSPR	1	S(1): 0.0; T(6): 0.0; T(12): 0.2; S(13): 99.8	149	Reverse	Class I
O60504	1	Vinexin OS=Homo sapiens GN=SORBS3 PE=1 SV=1 - [VINEX_HUMAN]	O60504	T562	Vinexin (SH3-containing adapter molecule 1) (SCAM-1) (Sorbin and SH3 domain-containing protein 3)	SORBS3 SCAM1	PTDLGGQTSPRRTGF	1.07296	0.101598	0.9603	-0.0584423	247000000	230000000	477000000	8.67852	109131			SPADPTDLGGQpTSPR	1	S(1): 0.0; T(6): 0.6; T(12): 98.8; S(13): 0.6	128	Reverse	Class I
O60506;O43390	2	Heterogeneous nuclear ribonucleoprotein Q OS=Homo sapiens GN=SYNCRIP PE=1 SV=2 - [HNRPQ_HUMAN]|Heterogeneous nuclear ribonucleoprotein R OS=Homo sapiens GN=HNRNPR PE=1 SV=1 - [HNRPR_HUMAN]	O60506	S249	Heterogeneous nuclear ribonucleoprotein Q (hnRNP Q) (Glycine- and tyrosine-rich RNA-binding protein) (GRY-RBP) (NS1-associated protein 1) (Synaptotagmin-binding, cytoplasmic RNA-interacting protein)	SYNCRIP HNRPQ NSAP1	NNRLFVGSIPKSKTK	0.393546	-1.3454	0.352224	-1.50544	13700000	34700000	48400000	7.68485	119279			LFVGpSIPK	1	S(5): 100.0	70	Reverse	Class I	O43390	S252	Heterogeneous nuclear ribonucleoprotein R (hnRNP R)	HNRNPR HNRPR
O60524	1	Serologically defined colon cancer antigen 1 OS=Homo sapiens GN=SDCCAG1 PE=1 SV=3 - [SDCG1_HUMAN]	O60524	S417	Nuclear export mediator factor NEMF (Antigen NY-CO-1) (Serologically defined colon cancer antigen 1)	NEMF SDCCAG1	LRNPYLLSEEEDDDV	1.39082	0.475936	1.24478	0.315896	97300000	70000000	167300000	8.2235	119151			NPYLLpSEEEDDDVDGDVNVEK	1	Y(3): 0.1; S(6): 99.9	108	Reverse	Class I
O60524	1	Serologically defined colon cancer antigen 1 OS=Homo sapiens GN=SDCCAG1 PE=1 SV=3 - [SDCG1_HUMAN]	O60524	S831	Nuclear export mediator factor NEMF (Antigen NY-CO-1) (Serologically defined colon cancer antigen 1)	NEMF SDCCAG1	MKKKKLPSDSGDLEA	1.05597	0.0785637	0.94509	-0.0814767	381000	361000	742000	5.8704	132226			KLPpSDSGDLEALEGK	1	S(4): 99.6; S(6): 0.4	85	Reverse	Class I
O60551	1	Glycylpeptide N-tetradecanoyltransferase 2 OS=Homo sapiens GN=NMT2 PE=2 SV=1 - [NMT2_HUMAN]	O60551	S38	Glycylpeptide N-tetradecanoyltransferase 2 (EC 2.3.1.97) (Myristoyl-CoA:protein N-myristoyltransferase 2) (NMT 2) (Peptide N-myristoyltransferase 2) (Type II N-myristoyltransferase)	NMT2	ETEHAKGSPGGYLGA	1.16414	0.21927	1.04191	0.0592296	20700000	17800000	38500000	7.58546	26950			GpSPGGYLGAK	1	S(2): 100.0; Y(6): 0.0	120	Reverse	Class I
O60566	1	Mitotic checkpoint serine/threonine-protein kinase BUB1 beta OS=Homo sapiens GN=BUB1B PE=1 SV=3 - [BUB1B_HUMAN]	O60566	S543	Mitotic checkpoint serine/threonine-protein kinase BUB1 beta (EC 2.7.11.1) (MAD3/BUB1-related protein kinase) (hBUBR1) (Mitotic checkpoint kinase MAD3L) (Protein SSK1)	BUB1B BUBR1 MAD3L SSK1	LSEKKNKSPPADPPR	0.888099	-0.171207	0.794849	-0.331247	4870000	5490000	10360000	7.01536	167962	Atypical/PIKK/FRAP	FRAP	KNKpSPPADPPR	1	S(4): 100.0	132	Reverse	Class I
O60583	1	Cyclin-T2 OS=Homo sapiens GN=CCNT2 PE=1 SV=2 - [CCNT2_HUMAN]	O60583	S3	Cyclin-T2 (CycT2)	CCNT2	*****MASGRGASSR	1.16144	0.215915	1.03949	0.0558744	40500000	34900000	75400000	7.87737	16955			MApSGRGASSR	1	S(3): 100.0; S(8): 0.0; S(9): 0.0	51	Reverse	Class I
O60583	1	Cyclin-T2 OS=Homo sapiens GN=CCNT2 PE=1 SV=2 - [CCNT2_HUMAN]	O60583	S480	Cyclin-T2 (CycT2)	CCNT2	ASSSSVTSPIKMKIP	1.10132	0.139236	0.985683	-0.0208046	122000000	111000000	233000000	8.36736	22561	CMGC/CDK/CDC2	CDC2, CDK2, CDK3	QGQSQAASSSSVTpSPIK	1	S(4): 0.0; S(8): 0.0; S(9): 0.0; S(10): 0.0; S(11): 0.0; T(13): 0.0; S(14): 100.0	351	Reverse	Class I
O60583	1	Cyclin-T2 OS=Homo sapiens GN=CCNT2 PE=1 SV=2 - [CCNT2_HUMAN]	O60583	T426	Cyclin-T2 (CycT2)	CCNT2	HHGPISTTPGIIPQK	1.86567	0.899695	1.66978	0.739655	15600000	8340000	23940000	7.37912	86611			HHGPISTpTPGIIPQK	1	S(6): 0.0; T(7): 0.0; T(8): 100.0	298	Reverse	Class I
O60664	1	Mannose-6-phosphate receptor-binding protein 1 OS=Homo sapiens GN=M6PRBP1 PE=1 SV=2 - [M6PBP_HUMAN]	O60664	S130	Perilipin-3 (47 kDa mannose 6-phosphate receptor-binding protein) (47 kDa MPR-binding protein) (Cargo selection protein TIP47) (Mannose-6-phosphate receptor-binding protein 1) (Placental protein 17) (PP17)	PLIN3 M6PRBP1 TIP47	ELVSSKVSGAQEMVS	1.49925	0.584241	1.34183	0.424201	3870000	2580000	6450000	6.80956	127932	CAMK/PKD	PKD2	ELVSSKVpSGAQEMVSSAK	1	S(4): 6.1; S(5): 6.1; S(8): 87.8; S(15): 0.0; S(16): 0.0	135	Reverse	Class I
O60673	1	DNA polymerase zeta catalytic subunit OS=Homo sapiens GN=REV3L PE=1 SV=2 - [DPOLZ_HUMAN]	O60673	S1114	DNA polymerase zeta catalytic subunit (EC 2.7.7.7) (Protein reversionless 3-like) (REV3-like) (hREV3)	REV3L POLZ REV3	MSKLGFLSERSTSPI	1.11111	0.152003	0.994444	-0.00803732	2240000	2010000	4250000	6.62839	119631			LGFLpSER	1	S(5): 100.0	42	Reverse	Class I
O60673	1	DNA polymerase zeta catalytic subunit OS=Homo sapiens GN=REV3L PE=1 SV=2 - [DPOLZ_HUMAN]	O60673	S1724	DNA polymerase zeta catalytic subunit (EC 2.7.7.7) (Protein reversionless 3-like) (REV3-like) (hREV3)	REV3L POLZ REV3	WIRSGTLSPEIFEKS	1.29366	0.37146	1.15783	0.211419	21300000	16500000	37800000	7.57749	111132			SGTLpSPEIFEK	1	S(1): 0.0; T(3): 0.7; S(5): 99.3	155	Reverse	Class I
O60701	1	UDP-glucose 6-dehydrogenase OS=Homo sapiens GN=UGDH PE=1 SV=1 - [UGDH_HUMAN]	O60701	S476	UDP-glucose 6-dehydrogenase (UDP-Glc dehydrogenase) (UDP-GlcDH) (UDPGDH) (EC 1.1.1.22)	UGDH	KRIPYAPSGEIPKFS	1.07991	0.110916	0.966523	-0.0491245	4080000	3780000	7860000	6.89542	61321			RIPYAPpSGEIPK	1	Y(4): 0.0; S(7): 100.0	181	Reverse	Class I
O60711	1	Leupaxin OS=Homo sapiens GN=LPXN PE=1 SV=1 - [LPXN_HUMAN]	O60711	S19	Leupaxin	LPXN LDLP	ERSTLQDSDEYSNPA	1.14025	0.189351	1.02052	0.0293108	1560000	1370000	2930000	6.46687	131680			STLQDpSDEYSNPAPLPLDQHSR	1	S(1): 0.5; T(2): 0.5; S(6): 97.9; Y(9): 0.5; S(10): 0.5; S(21): 0.0	116	Reverse	Class I
O60716	1	Catenin delta-1 OS=Homo sapiens GN=CTNND1 PE=1 SV=1 - [CTND1_HUMAN]	O60716	S171	Catenin delta-1 (Cadherin-associated Src substrate) (CAS) (p120 catenin) (p120(ctn)) (p120(cas))	CTNND1 KIAA0384	PVDASSVSNNYIQTL	0.591716	-0.757023	0.529586	-0.917064	39500000	66800000	106300000	8.02653	106899	TKL/STKR	TGFbR2	TVQPVAMGPDGLPVDASSVpSNNYIQTLGR	1	T(1): 0.0; S(17): 0.0; S(18): 0.4; S(20): 97.4; Y(23): 2.2; T(26): 0.0	68	Reverse	Class I
O60716	1	Catenin delta-1 OS=Homo sapiens GN=CTNND1 PE=1 SV=1 - [CTND1_HUMAN]	O60716	S230	Catenin delta-1 (Cadherin-associated Src substrate) (CAS) (p120 catenin) (p120(ctn)) (p120(cas))	CTNND1 KIAA0384	GGSDNYGSLSRVTRI	0.791139	-0.337996	0.70807	-0.498037	770000000	974000000	1744000000	9.24155	60802	AGC/DMPK/ROCK	ROCK1, ROCK2	HYEDGYPGGSDNYGpSLSR	1	Y(2): 0.0; Y(6): 0.0; S(10): 0.0; Y(13): 0.0; S(15): 100.0; S(17): 0.0	336	Reverse	Class I
O60716	1	Catenin delta-1 OS=Homo sapiens GN=CTNND1 PE=1 SV=1 - [CTND1_HUMAN]	O60716	S252	Catenin delta-1 (Cadherin-associated Src substrate) (CAS) (p120 catenin) (p120(ctn)) (p120(cas))	CTNND1 KIAA0384	MEGYRAPSRQDVYGP	0.793021	-0.334568	0.709754	-0.494609	482000000	608000000	1090000000	9.03743	51221			APpSRQDVYGPQPQVR	1	S(3): 100.0; Y(8): 0.0	284	Reverse	Class I
O60716	1	Catenin delta-1 OS=Homo sapiens GN=CTNND1 PE=1 SV=1 - [CTND1_HUMAN]	O60716	S268	Catenin delta-1 (Cadherin-associated Src substrate) (CAS) (p120 catenin) (p120(ctn)) (p120(cas))	CTNND1 KIAA0384	PQVRVGGSSVDLHRF	0.793651	-0.333424	0.710317	-0.493464	1130000000	1420000000	2550000000	9.40654	59753			VGGpSSVDLHR	1	S(4): 99.8; S(5): 0.2	137	Reverse	Class I
O60716	1	Catenin delta-1 OS=Homo sapiens GN=CTNND1 PE=1 SV=1 - [CTND1_HUMAN]	O60716	S269	Catenin delta-1 (Cadherin-associated Src substrate) (CAS) (p120 catenin) (p120(ctn)) (p120(cas))	CTNND1 KIAA0384	QVRVGGSSVDLHRFH	1.35318	0.436354	1.2111	0.276313	115000000	85000000	200000000	8.30103	133776	TKL/STKR	TGFbR2	VGGSpSVDLHR	1	S(4): 1.0; S(5): 99.0	125	Reverse	Class I
O60716	1	Catenin delta-1 OS=Homo sapiens GN=CTNND1 PE=1 SV=1 - [CTND1_HUMAN]	O60716	S288	Catenin delta-1 (Cadherin-associated Src substrate) (CAS) (p120 catenin) (p120(ctn)) (p120(cas))	CTNND1 KIAA0384	GLEDDQRSMGYDDLD	1.24069	0.311148	1.11042	0.151108	11800000	9520000	21320000	7.32879	10805			pSMGYDDLDYGMMSDYGTAR	1	S(1): 99.9; Y(4): 0.1; Y(9): 0.0; S(13): 0.0; Y(15): 0.0; T(17): 0.0	146	Reverse	Class I
O60716	1	Catenin delta-1 OS=Homo sapiens GN=CTNND1 PE=1 SV=1 - [CTND1_HUMAN]	O60716	S300	Catenin delta-1 (Cadherin-associated Src substrate) (CAS) (p120 catenin) (p120(ctn)) (p120(cas))	CTNND1 KIAA0384	DLDYGMMSDYGTARR	1.26743	0.341903	1.13435	0.181862	9520000	7520000	17040000	7.23147	117470			SMGYDDLDYGMMpSDYGTAR	1	S(1): 0.0; Y(4): 0.0; Y(9): 0.3; S(13): 99.4; Y(15): 0.3; T(17): 0.0	107	Reverse	Class I
O60716	1	Catenin delta-1 OS=Homo sapiens GN=CTNND1 PE=1 SV=1 - [CTND1_HUMAN]	O60716	S346	Catenin delta-1 (Cadherin-associated Src substrate) (CAS) (p120 catenin) (p120(ctn)) (p120(cas))	CTNND1 KIAA0384	LAQHERGSLASLDSL	1.49477	0.579922	1.33782	0.419881	17600000	11800000	29400000	7.46835	24700	AGC	PKN1, PKN2	GpSLASLDSLR	1	S(2): 99.0; S(5): 1.0; S(8): 0.0	77	Reverse	Class I
O60716	1	Catenin delta-1 OS=Homo sapiens GN=CTNND1 PE=1 SV=1 - [CTND1_HUMAN]	O60716	S349	Catenin delta-1 (Cadherin-associated Src substrate) (CAS) (p120 catenin) (p120(ctn)) (p120(cas))	CTNND1 KIAA0384	HERGSLASLDSLRKG	1.34409	0.426625	1.20296	0.266585	231000000	172000000	403000000	8.60531	135742	TKL/STKR	TGFbR2	GSLApSLDSLRK	1	S(2): 0.0; S(5): 100.0; S(8): 0.0	108	Reverse	Class I
O60716	1	Catenin delta-1 OS=Homo sapiens GN=CTNND1 PE=1 SV=1 - [CTND1_HUMAN]	O60716	S352	Catenin delta-1 (Cadherin-associated Src substrate) (CAS) (p120 catenin) (p120(ctn)) (p120(cas))	CTNND1 KIAA0384	GSLASLDSLRKGGPP	0.30012	-1.73639	0.268607	-1.89643	11900000	39800000	51700000	7.71349	51955			GSLASLDpSLRK	1	S(2): 0.0; S(5): 0.0; S(8): 100.0	137	Reverse	Class I
O60716	1	Catenin delta-1 OS=Homo sapiens GN=CTNND1 PE=1 SV=1 - [CTND1_HUMAN]	O60716	S47	Catenin delta-1 (Cadherin-associated Src substrate) (CAS) (p120 catenin) (p120(ctn)) (p120(cas))	CTNND1 KIAA0384	QLERVRVSPQDANPL	1.18343	0.242977	1.05917	0.0829363	39400000	33300000	72700000	7.86153	131797	CMGC/CDK/CDC2	CDK2	VRVpSPQDANPLMANGTLTR	1	S(4): 100.0; T(16): 0.0; T(18): 0.0	171	Reverse	Class I
O60716	1	Catenin delta-1 OS=Homo sapiens GN=CTNND1 PE=1 SV=1 - [CTND1_HUMAN]	O60716	S713	Catenin delta-1 (Cadherin-associated Src substrate) (CAS) (p120 catenin) (p120(ctn)) (p120(cas))	CTNND1 KIAA0384	LRQEKALSAIADLLT	1.03093	0.0439433	0.92268	-0.116097	2010000	1950000	3960000	6.5977	138575			ALpSAIADLLTNEHER	1	S(3): 100.0; T(10): 0.0	331	Reverse	Class I
O60716	1	Catenin delta-1 OS=Homo sapiens GN=CTNND1 PE=1 SV=1 - [CTND1_HUMAN]	O60716	S81	Catenin delta-1 (Cadherin-associated Src substrate) (CAS) (p120 catenin) (p120(ctn)) (p120(cas))	CTNND1 KIAA0384	DLERQKFSDLKLNGP	0.593824	-0.751892	0.531473	-0.911933	3800000	6400000	10200000	7.0086	57596			QKFpSDLK	1	S(4): 100.0	96	Reverse	Class I
O60716	1	Catenin delta-1 OS=Homo sapiens GN=CTNND1 PE=1 SV=1 - [CTND1_HUMAN]	O60716	S847	Catenin delta-1 (Cadherin-associated Src substrate) (CAS) (p120 catenin) (p120(ctn)) (p120(cas))	CTNND1 KIAA0384	EKEGWKKSDFQVNLN	1.1655	0.22095	1.04312	0.06091	59700000	51200000	110900000	8.04493	74298			EGWKKpSDFQVNLNNASR	1	S(6): 100.0; S(16): 0.0	348	Reverse	Class I
O60716	1	Catenin delta-1 OS=Homo sapiens GN=CTNND1 PE=1 SV=1 - [CTND1_HUMAN]	O60716	S857	Catenin delta-1 (Cadherin-associated Src substrate) (CAS) (p120 catenin) (p120(ctn)) (p120(cas))	CTNND1 KIAA0384	QVNLNNASRSQSSHS	1.53846	0.621488	1.37692	0.461448	3150000	2050000	5200000	6.716	117478	CMGC/GSK	GSK3A	SDFQVNLNNApSR	1	S(1): 0.0; S(11): 100.0	62	Reverse	Class I
O60716	1	Catenin delta-1 OS=Homo sapiens GN=CTNND1 PE=1 SV=1 - [CTND1_HUMAN]	O60716	S861	Catenin delta-1 (Cadherin-associated Src substrate) (CAS) (p120 catenin) (p120(ctn)) (p120(cas))	CTNND1 KIAA0384	NNASRSQSSHSYDDS	1.45138	0.537424	1.29898	0.377384	16100000	11100000	27200000	7.43457	111085	TKL/STKR	TGFbR2	SQpSpSHSYDDSTLPLIDR	2	S(1): 2.0; S(3): 98.0; S(4): 98.0; S(6): 2.0; Y(7): 0.0; S(10): 0.0; T(11): 0.0	123	Reverse	Class I
O60716	1	Catenin delta-1 OS=Homo sapiens GN=CTNND1 PE=1 SV=1 - [CTND1_HUMAN]	O60716	S862	Catenin delta-1 (Cadherin-associated Src substrate) (CAS) (p120 catenin) (p120(ctn)) (p120(cas))	CTNND1 KIAA0384	NASRSQSSHSYDDST	1.18906	0.249822	1.06421	0.0897819	28000000	23600000	51600000	7.71265	125863	CK1	CK1d, CK1e	SQSpSHSYDDSTLPLIDR	1	S(1): 0.6; S(3): 0.6; S(4): 98.8; S(6): 0.0; Y(7): 0.0; S(10): 0.0; T(11): 0.0	176	Reverse	Class I
O60716	1	Catenin delta-1 OS=Homo sapiens GN=CTNND1 PE=1 SV=1 - [CTND1_HUMAN]	O60716	S864	Catenin delta-1 (Cadherin-associated Src substrate) (CAS) (p120 catenin) (p120(ctn)) (p120(cas))	CTNND1 KIAA0384	SRSQSSHSYDDSTLP	1.11483	0.15682	0.99777	-0.0032203	315000000	283000000	598000000	8.7767	55908	TKL/STKR	TGFbR2	SQSSHpSYDDSTLPLIDR	1	S(1): 0.0; S(3): 0.0; S(4): 0.0; S(6): 100.0; Y(7): 0.0; S(10): 0.0; T(11): 0.0	379	Reverse	Class I
O60716	1	Catenin delta-1 OS=Homo sapiens GN=CTNND1 PE=1 SV=1 - [CTND1_HUMAN]	O60716	S868	Catenin delta-1 (Cadherin-associated Src substrate) (CAS) (p120 catenin) (p120(ctn)) (p120(cas))	CTNND1 KIAA0384	SSHSYDDSTLPLIDR	1.04822	0.0679388	0.938155	-0.0921016	52300000	49900000	102200000	8.00945	138334			SQSSHSYDDpSTLPLIDR	1	S(1): 0.0; S(3): 0.0; S(4): 0.0; S(6): 0.0; Y(7): 0.0; S(10): 92.8; T(11): 7.2	144	Reverse	Class I
O60716	1	Catenin delta-1 OS=Homo sapiens GN=CTNND1 PE=1 SV=1 - [CTND1_HUMAN]	O60716	S899	Catenin delta-1 (Cadherin-associated Src substrate) (CAS) (p120 catenin) (p120(ctn)) (p120(cas))	CTNND1 KIAA0384	NMGSNTKSLDNNYST	1.35135	0.434403	1.20946	0.274362	40900000	30300000	71200000	7.85248	26495			pSLDNNYSTPNER	1	S(1): 99.9; Y(6): 0.1; S(7): 0.0; T(8): 0.0	54	Reverse	Class I
O60716	1	Catenin delta-1 OS=Homo sapiens GN=CTNND1 PE=1 SV=1 - [CTND1_HUMAN]	O60716	S920	Catenin delta-1 (Cadherin-associated Src substrate) (CAS) (p120 catenin) (p120(ctn)) (p120(cas))	CTNND1 KIAA0384	HNRTLDRSGDLGDME	1.31926	0.39973	1.18074	0.23969	491000000	372000000	863000000	8.93601	51736	TKL/STKR	TGFbR2	TLDRpSGDLGDMEPLK	1	T(1): 0.0; S(5): 100.0	356	Reverse	Class I
O60716	1	Catenin delta-1 OS=Homo sapiens GN=CTNND1 PE=1 SV=1 - [CTND1_HUMAN]	O60716	T177	Catenin delta-1 (Cadherin-associated Src substrate) (CAS) (p120 catenin) (p120(ctn)) (p120(cas))	CTNND1 KIAA0384	VSNNYIQTLGRDFRK	0.56243	-0.830255	0.503375	-0.990296	62700000	111000000	173700000	8.2398	29878			TVQPVAMGPDGLPVDASSVSNNYIQpTLGR	1	T(1): 0.0; S(17): 0.0; S(18): 0.0; S(20): 0.0; Y(23): 0.2; T(26): 99.8	90	Reverse	Class I
O60716	1	Catenin delta-1 OS=Homo sapiens GN=CTNND1 PE=1 SV=1 - [CTND1_HUMAN]	O60716	T199	Catenin delta-1 (Cadherin-associated Src substrate) (CAS) (p120 catenin) (p120(ctn)) (p120(cas))	CTNND1 KIAA0384	PYVGQAGTATLPRNF	0.569476	-0.812293	0.509681	-0.972333	146000000	257000000	403000000	8.60531	117003			NGNGGPGPYVGQAGpTATLPR	1	Y(9): 0.8; T(15): 91.8; T(17): 7.5	30	Reverse	Class I
O60716	1	Catenin delta-1 OS=Homo sapiens GN=CTNND1 PE=1 SV=1 - [CTND1_HUMAN]	O60716	T201	Catenin delta-1 (Cadherin-associated Src substrate) (CAS) (p120 catenin) (p120(ctn)) (p120(cas))	CTNND1 KIAA0384	VGQAGTATLPRNFHY	0.597372	-0.7433	0.534648	-0.90334	188000000	314000000	502000000	8.7007	27880			NGNGGPGPYVGQAGTApTLPR	1	Y(9): 0.0; T(15): 2.3; T(17): 97.7	61	Reverse	Class I
O60716	1	Catenin delta-1 OS=Homo sapiens GN=CTNND1 PE=1 SV=1 - [CTND1_HUMAN]	O60716	T59	Catenin delta-1 (Cadherin-associated Src substrate) (CAS) (p120 catenin) (p120(ctn)) (p120(cas))	CTNND1 KIAA0384	NPLMANGTLTRRHQN	0.462963	-1.11103	0.414352	-1.27107	60200000	130000000	190200000	8.27921	52114			VSPQDANPLMANGpTLTRR	1	S(2): 0.0; T(14): 100.0; T(16): 0.0	252	Reverse	Class I
O60716	1	Catenin delta-1 OS=Homo sapiens GN=CTNND1 PE=1 SV=1 - [CTND1_HUMAN]	O60716	T643	Catenin delta-1 (Cadherin-associated Src substrate) (CAS) (p120 catenin) (p120(ctn)) (p120(cas))	CTNND1 KIAA0384	IEDPANDTVDFPKRT	1.14155	0.190997	1.02169	0.0309568	34000000	29800000	63800000	7.80482	170031			GKKPIEDPANDpTVDFPK	1	T(12): 100.0	151	Reverse	Class I
O60716	1	Catenin delta-1 OS=Homo sapiens GN=CTNND1 PE=1 SV=1 - [CTND1_HUMAN]	O60716	T869	Catenin delta-1 (Cadherin-associated Src substrate) (CAS) (p120 catenin) (p120(ctn)) (p120(cas))	CTNND1 KIAA0384	SHSYDDSTLPLIDRN	1.03199	0.0454314	0.923633	-0.114609	866000000	839000000	1705000000	9.23172	61349			SQSSHSYDDSpTLPLIDR	1	S(1): 0.0; S(3): 0.0; S(4): 0.0; S(6): 0.0; Y(7): 0.0; S(10): 0.0; T(11): 100.0	389	Reverse	Class I
O60716	1	Catenin delta-1 OS=Homo sapiens GN=CTNND1 PE=1 SV=1 - [CTND1_HUMAN]	O60716	T906	Catenin delta-1 (Cadherin-associated Src substrate) (CAS) (p120 catenin) (p120(ctn)) (p120(cas))	CTNND1 KIAA0384	SLDNNYSTPNERGDH	0.830565	-0.267835	0.743355	-0.427876	4040000	4860000	8900000	6.94939	153843	CMGC/CDK/CDC2	CDK2	SLDNNYSpTPNERGDHNR	1	S(1): 0.0; Y(6): 0.0; S(7): 0.5; T(8): 99.5	196	Reverse	Class I
O60716	1	Catenin delta-1 OS=Homo sapiens GN=CTNND1 PE=1 SV=1 - [CTND1_HUMAN]	O60716	T98	Catenin delta-1 (Cadherin-associated Src substrate) (CAS) (p120 catenin) (p120(ctn)) (p120(cas))	CTNND1 KIAA0384	HSHLLYSTIPRMQEP	0.423191	-1.24062	0.378756	-1.40066	140000000	330000000	470000000	8.6721	74050			LNGPQDHSHLLYSpTIPR	1	S(8): 0.0; Y(12): 0.0; S(13): 0.0; T(14): 100.0	260	Reverse	Class I
O60716	1	Catenin delta-1 OS=Homo sapiens GN=CTNND1 PE=1 SV=1 - [CTND1_HUMAN]	O60716	Y228	Catenin delta-1 (Cadherin-associated Src substrate) (CAS) (p120 catenin) (p120(ctn)) (p120(cas))	CTNND1 KIAA0384	YPGGSDNYGSLSRVT	0.772798	-0.371838	0.691654	-0.531878	479000000	621000000	1100000000	9.04139	144895	TK/EGFR	EGFR, ErbB2	HYEDGYPGGSDNpYGSLSR	1	Y(2): 0.0; Y(6): 0.0; S(10): 0.0; Y(13): 99.6; S(15): 0.4; S(17): 0.0	213	Reverse	Class I
O60716	1	Catenin delta-1 OS=Homo sapiens GN=CTNND1 PE=1 SV=1 - [CTND1_HUMAN]	O60716	Y291	Catenin delta-1 (Cadherin-associated Src substrate) (CAS) (p120 catenin) (p120(ctn)) (p120(cas))	CTNND1 KIAA0384	DDQRSMGYDDLDYGM	1.27877	0.354759	1.1445	0.194719	13500000	10500000	24000000	7.38021	5255	TK/InsR	IGF1R	SMGpYDDLDYGMMSDYGTAR	1	S(1): 1.1; Y(4): 97.8; Y(9): 1.1; S(13): 0.0; Y(15): 0.0; T(17): 0.0	149	Reverse	Class I
O60716	1	Catenin delta-1 OS=Homo sapiens GN=CTNND1 PE=1 SV=1 - [CTND1_HUMAN]	O60716	Y96	Catenin delta-1 (Cadherin-associated Src substrate) (CAS) (p120 catenin) (p120(ctn)) (p120(cas))	CTNND1 KIAA0384	QDHSHLLYSTIPRMQ	0.411692	-1.28036	0.368464	-1.4404	70400000	171000000	241400000	8.38274	74090	TK/Fak	FAK, PYK2	LNGPQDHSHLLpYSTIPR	1	S(8): 0.0; Y(12): 98.4; S(13): 0.8; T(14): 0.8	186	Reverse	Class I
O60749	1	Sorting nexin-2 OS=Homo sapiens GN=SNX2 PE=1 SV=2 - [SNX2_HUMAN]	O60749	S119	Sorting nexin-2 (Transformation-related gene 9 protein) (TRG-9)	SNX2 TRG9	RIESKSMSAPVIFDR	0.888099	-0.171207	0.794849	-0.331247	13100000	14800000	27900000	7.4456	28485	TKL/STKR	ACTR2B, ALK4, TGFbR1, TGFbR2	SMpSAPVIFDR	1	S(1): 0.0; S(3): 100.0	99	Reverse	Class I
O60749	1	Sorting nexin-2 OS=Homo sapiens GN=SNX2 PE=1 SV=2 - [SNX2_HUMAN]	O60749	S185	Sorting nexin-2 (Transformation-related gene 9 protein) (TRG-9)	SNX2 TRG9	FSVKRRFSDFLGLHS	1.16144	0.215915	1.03949	0.0558744	603000	519000	1122000	6.04999	80039			RFpSDFLGLHSK	1	S(3): 100.0; S(10): 0.0	234	Reverse	Class I
O60749	1	Sorting nexin-2 OS=Homo sapiens GN=SNX2 PE=1 SV=2 - [SNX2_HUMAN]	O60749	S277	Sorting nexin-2 (Transformation-related gene 9 protein) (TRG-9)	SNX2 TRG9	AVNTQALSGAGILRM	2.21729	1.1488	1.98448	0.98876	1940000	875000	2815000	6.44948	118769			AVNTQALpSGAGILR	1	T(4): 0.0; S(8): 100.0	119	Reverse	Class I
O60763	1	General vesicular transport factor p115 OS=Homo sapiens GN=USO1 PE=1 SV=2 - [USO1_HUMAN]	O60763	S942	General vesicular transport factor p115 (Protein USO1 homolog) (Transcytosis-associated protein) (TAP) (Vesicle-docking protein)	USO1 VDP	EEEDELESGDQEDED	1.30378	0.382702	1.16688	0.222661	93200000	71500000	164700000	8.21669	36286			DLGHPVEEEDELEpSGDQEDEDDESEDPGK	1	S(14): 100.0; S(24): 0.0	287	Reverse	Class I
O60784	1	Target of Myb protein 1 OS=Homo sapiens GN=TOM1 PE=1 SV=2 - [TOM1_HUMAN]	O60784	S355	Target of Myb protein 1	TOM1	SVRAGLQSLEASGRL	1.25156	0.323733	1.12015	0.163692	36700000	29300000	66000000	7.81954	116899			AGLQpSLEASGR	1	S(5): 100.0; S(9): 0.0	127	Reverse	Class I
O60825	1	6-phosphofructo-2-kinase/fructose-2,6-biphosphatase 2 OS=Homo sapiens GN=PFKFB2 PE=1 SV=2 - [F262_HUMAN]	O60825	S466	6-phosphofructo-2-kinase/fructose-2,6-bisphosphatase 2 (6PF-2-K/Fru-2,6-P2ase 2) (PFK/FBPase 2) (6PF-2-K/Fru-2,6-P2ase heart-type isozyme) [Includes: 6-phosphofructo-2-kinase (EC 2.7.1.105); Fructose-2,6-bisphosphatase (EC 3.1.3.46)]	PFKFB2	PVRMRRNSFTPLSSS	2.079	1.05589	1.86071	0.895851	6290000	3030000	9320000	6.96942	60938	AGC/AKT	AKT1	RNpSFTPLSSSNTIR	1	S(3): 100.0; T(5): 0.0; S(8): 0.0; S(9): 0.0; S(10): 0.0; T(12): 0.0	248	Reverse	Class I
O60825	1	6-phosphofructo-2-kinase/fructose-2,6-biphosphatase 2 OS=Homo sapiens GN=PFKFB2 PE=1 SV=2 - [F262_HUMAN]	O60825	S493	6-phosphofructo-2-kinase/fructose-2,6-bisphosphatase 2 (6PF-2-K/Fru-2,6-P2ase 2) (PFK/FBPase 2) (6PF-2-K/Fru-2,6-P2ase heart-type isozyme) [Includes: 6-phosphofructo-2-kinase (EC 2.7.1.105); Fructose-2,6-bisphosphatase (EC 3.1.3.46)]	PFKFB2	SRPLKPLSPLRAQDM	0.876424	-0.190299	0.7844	-0.350339	1130000	1280000	2410000	6.38202	167192			NYSVGSRPLKPLpSPLR	1	Y(2): 0.0; S(3): 0.0; S(6): 0.0; S(13): 100.0	82	Reverse	Class I
O60826	1	Coiled-coil domain-containing protein 22 OS=Homo sapiens GN=CCDC22 PE=1 SV=1 - [CCD22_HUMAN]	O60826	S54	Coiled-coil domain-containing protein 22	CCDC22 CXorf37 JM1	PAVGSGLSPLLPLAM	0.952381	-0.0703893	0.852381	-0.23043	15200000	16000000	31200000	7.49415	120919			VINPAVGSGLpSPLLPLAMSAR	1	S(8): 2.4; S(11): 97.6; S(19): 0.0	57	Reverse	Class I
O60832	1	H/ACA ribonucleoprotein complex subunit 4 OS=Homo sapiens GN=DKC1 PE=1 SV=3 - [DKC1_HUMAN]	O60832	S485	H/ACA ribonucleoprotein complex subunit 4 (EC 5.4.99.-) (CBF5 homolog) (Dyskerin) (Nopp140-associated protein of 57 kDa) (Nucleolar protein NAP57) (Nucleolar protein family A member 4) (snoRNP protein DKC1)	DKC1 NOLA4	KAKAGLESGAEPGDG	0.620732	-0.687956	0.555556	-0.847997	3820000	6160000	9980000	6.99913	113754	Other/CK2	CK2a2	AGLEpSGAEPGDGDSDTTK	1	S(5): 100.0; S(14): 0.0; T(16): 0.0; T(17): 0.0	88	Reverse	Class I
O60832	1	H/ACA ribonucleoprotein complex subunit 4 OS=Homo sapiens GN=DKC1 PE=1 SV=3 - [DKC1_HUMAN]	O60832	S494	H/ACA ribonucleoprotein complex subunit 4 (EC 5.4.99.-) (CBF5 homolog) (Dyskerin) (Nopp140-associated protein of 57 kDa) (Nucleolar protein NAP57) (Nucleolar protein family A member 4) (snoRNP protein DKC1)	DKC1 NOLA4	AEPGDGDSDTTKKKK	1.14286	0.192645	1.02286	0.0326047	499000000	437000000	936000000	8.97128	113584	Other/CK2	CK2a2	AGLESGAEPGDGDpSDTTK	1	S(5): 0.0; S(14): 94.0; T(16): 3.0; T(17): 3.0	175	Reverse	Class I
O60832	1	H/ACA ribonucleoprotein complex subunit 4 OS=Homo sapiens GN=DKC1 PE=1 SV=3 - [DKC1_HUMAN]	O60832	S513	H/ACA ribonucleoprotein complex subunit 4 (EC 5.4.99.-) (CBF5 homolog) (Dyskerin) (Nopp140-associated protein of 57 kDa) (Nucleolar protein NAP57) (Nucleolar protein family A member 4) (snoRNP protein DKC1)	DKC1 NOLA4	AKEVELVSE******	1.04058	0.0573917	0.931322	-0.102649	166000000	159000000	325000000	8.51188	35195	Other/CK2	CK2a2	AKEVELVpSE	1	S(8): 100.0	114	Reverse	Class I
O60841	1	Eukaryotic translation initiation factor 5B OS=Homo sapiens GN=EIF5B PE=1 SV=3 - [IF2P_HUMAN]	O60841	S107	Eukaryotic translation initiation factor 5B (eIF-5B) (Translation initiation factor IF-2)	EIF5B IF2 KIAA0741	GQKGKKQSFDDNDSE	1.39082	0.475936	1.24478	0.315896	7870000	5660000	13530000	7.1313	161986	AGC	LATS1	KQpSFDDNDSEELEDKDSK	1	S(3): 99.0; S(9): 1.0; S(17): 0.0	101	Reverse	Class I
O60841	1	Eukaryotic translation initiation factor 5B OS=Homo sapiens GN=EIF5B PE=1 SV=3 - [IF2P_HUMAN]	O60841	S113	Eukaryotic translation initiation factor 5B (eIF-5B) (Translation initiation factor IF-2)	EIF5B IF2 KIAA0741	QSFDDNDSEELEDKD	1.00705	0.0101344	0.901309	-0.149906	802000000	796000000	1598000000	9.20358	47555			QSFDDNDpSEELEDKDSK	1	S(2): 0.0; S(8): 100.0; S(16): 0.0	483	Reverse	Class I
O60841	1	Eukaryotic translation initiation factor 5B OS=Homo sapiens GN=EIF5B PE=1 SV=3 - [IF2P_HUMAN]	O60841	S1168	Eukaryotic translation initiation factor 5B (eIF-5B) (Translation initiation factor IF-2)	EIF5B IF2 KIAA0741	IEPIPGESPKMFGRH	1.20919	0.274041	1.08222	0.114	121000000	100000000	221000000	8.34439	116069			IEPIPGEpSPK	1	S(8): 100.0	102	Reverse	Class I
O60841	1	Eukaryotic translation initiation factor 5B OS=Homo sapiens GN=EIF5B PE=1 SV=3 - [IF2P_HUMAN]	O60841	S135	Eukaryotic translation initiation factor 5B (eIF-5B) (Translation initiation factor IF-2)	EIF5B IF2 KIAA0741	KPKVEMYSGSDDDDD	1.10988	0.150401	0.993341	-0.00963942	812000000	732000000	1544000000	9.18865	28430			VEMYpSGpSDDDDDFNKLPK	2	Y(4): 11.5; S(5): 89.8; S(7): 98.7	71	Reverse	Class I
O60841	1	Eukaryotic translation initiation factor 5B OS=Homo sapiens GN=EIF5B PE=1 SV=3 - [IF2P_HUMAN]	O60841	S137	Eukaryotic translation initiation factor 5B (eIF-5B) (Translation initiation factor IF-2)	EIF5B IF2 KIAA0741	KVEMYSGSDDDDDFN	1.04058	0.0573917	0.931322	-0.102649	10700000	10300000	21000000	7.32222	162609			VEMYSGpSDDDDDFNKLPKK	1	Y(4): 0.0; S(5): 1.3; S(7): 98.6	133	Reverse	Class I
O60841	1	Eukaryotic translation initiation factor 5B OS=Homo sapiens GN=EIF5B PE=1 SV=3 - [IF2P_HUMAN]	O60841	S164	Eukaryotic translation initiation factor 5B (eIF-5B) (Translation initiation factor IF-2)	EIF5B IF2 KIAA0741	SNKKWDGSEEDEDNS	1.10254	0.140826	0.98677	-0.0192149	246000000	224000000	470000000	8.6721	72430			KWDGpSEEDEDNSKK	1	S(5): 100.0; S(12): 0.0	389	Reverse	Class I
O60841	1	Eukaryotic translation initiation factor 5B OS=Homo sapiens GN=EIF5B PE=1 SV=3 - [IF2P_HUMAN]	O60841	S214	Eukaryotic translation initiation factor 5B (eIF-5B) (Translation initiation factor IF-2)	EIF5B IF2 KIAA0741	KPGPNIESGNEDDDA	1.10865	0.148801	0.992239	-0.0112398	3910000000	3530000000	7440000000	9.87157	51600			NKPGPNIEpSGNEDDDASFK	1	S(9): 100.0; S(17): 0.0	343	Reverse	Class I
O60841	1	Eukaryotic translation initiation factor 5B OS=Homo sapiens GN=EIF5B PE=1 SV=3 - [IF2P_HUMAN]	O60841	S438	Eukaryotic translation initiation factor 5B (eIF-5B) (Translation initiation factor IF-2)	EIF5B IF2 KIAA0741	VEVPSKDSLPKKRPI	0.784929	-0.349365	0.702512	-0.509406	2790000	3550000	6340000	6.80209	125463			LLQAQGVEVPSKDpSLPK	1	S(11): 0.0; S(14): 100.0	270	Reverse	Class I
O60841	1	Eukaryotic translation initiation factor 5B OS=Homo sapiens GN=EIF5B PE=1 SV=3 - [IF2P_HUMAN]	O60841	S66	Eukaryotic translation initiation factor 5B (eIF-5B) (Translation initiation factor IF-2)	EIF5B IF2 KIAA0741	LKELEELSLEAQGIK	0.984252	-0.0229004	0.880906	-0.182941	5460000	5550000	11010000	7.04179	119418			ELEELpSLEAQGIK	1	S(6): 100.0	121	Reverse	Class I
O60885	1	Bromodomain-containing protein 4 OS=Homo sapiens GN=BRD4 PE=1 SV=2 - [BRD4_HUMAN]	O60885	S1083	Bromodomain-containing protein 4 (Protein HUNK1)	BRD4 HUNK1	FQSLTHQSPPQQNVQ	0.993049	-0.0100637	0.888779	-0.170104	25900000	26100000	52000000	7.716	61633			EAPSPLMIHSPQMSQFQSLTHQpSPPQQNVQPK	1	S(4): 1.0; S(10): 4.8; S(14): 2.1; S(18): 2.1; T(20): 2.1; S(23): 88.0	35	Reverse	Class I
O60885	1	Bromodomain-containing protein 4 OS=Homo sapiens GN=BRD4 PE=1 SV=2 - [BRD4_HUMAN]	O60885	S1117	Bromodomain-containing protein 4 (Protein HUNK1)	BRD4 HUNK1	VKEEKIHSPIIRSEP	0.927644	-0.108357	0.830241	-0.268398	91500000	98600000	190100000	8.27898	141739	Atypical/PIKK/FRAP	FRAP	IHpSPIIR	1	S(3): 100.0	74	Reverse	Class I
O60885	1	Bromodomain-containing protein 4 OS=Homo sapiens GN=BRD4 PE=1 SV=2 - [BRD4_HUMAN]	O60885	S593	Bromodomain-containing protein 4 (Protein HUNK1)	BRD4 HUNK1	KEPAPMKSKPPPTYE	0.864304	-0.210389	0.773552	-0.370429	141000000	164000000	305000000	8.4843	50451			pSKPPPTYESEEEDK	1	S(1): 97.7; T(6): 0.8; Y(7): 0.8; S(9): 0.8	35	Reverse	Class I
O60885	1	Bromodomain-containing protein 4 OS=Homo sapiens GN=BRD4 PE=1 SV=2 - [BRD4_HUMAN]	O60885	S601	Bromodomain-containing protein 4 (Protein HUNK1)	BRD4 HUNK1	KPPPTYESEEEDKCK	0.864304	-0.210389	0.773552	-0.370429	141000000	164000000	305000000	8.4843	50451	CMGC/CDK/CDC2	CDC2, CDK2, CDK3	SKPPPTYEpSEEEDK	1	S(1): 0.0; T(6): 1.8; Y(7): 1.8; S(9): 96.3	95	Reverse	Class I
O60885	1	Bromodomain-containing protein 4 OS=Homo sapiens GN=BRD4 PE=1 SV=2 - [BRD4_HUMAN]	O60885	T1080	Bromodomain-containing protein 4 (Protein HUNK1)	BRD4 HUNK1	MSQFQSLTHQSPPQQ	0.997009	-0.00432161	0.892323	-0.164362	16900000	17000000	33900000	7.5302	49040			EAPSPLMIHSPQMSQFQSLpTHQpSPPQQNVQPK	2	S(4): 0.6; S(10): 3.5; S(14): 3.5; S(18): 8.8; T(20): 85.3; S(23): 98.4	33	Reverse	Class I
O60930	1	Ribonuclease H1 OS=Homo sapiens GN=RNASEH1 PE=1 SV=2 - [RNH1_HUMAN]	O60930	S76	Ribonuclease H1 (RNase H1) (EC 3.1.26.4) (Ribonuclease H type II)	RNASEH1 RNH1	AFVRKSASPEVSEGH	1.22549	0.293359	1.09681	0.133319	24800000	20200000	45000000	7.65321	67541			SApSPEVSEGHENQHGQESEAK	1	S(1): 0.5; S(3): 99.5; S(7): 0.0; S(18): 0.0	203	Reverse	Class I
O60934	1	Nibrin OS=Homo sapiens GN=NBN PE=1 SV=1 - [NBN_HUMAN]	O60934	S432	Nibrin (Cell cycle regulatory protein p95) (Nijmegen breakage syndrome protein 1)	NBN NBS NBS1 P95	RIPNYQLSPTKLPSI	1.01523	0.0218044	0.908629	-0.138236	24100000	23800000	47900000	7.68034	128579	CMGC/CDK/CDC2	CDK2	IPNYQLpSPTKLPSINK	1	Y(4): 4.9; S(7): 90.1; T(9): 4.9; S(13): 0.0	98	Reverse	Class I
O60934	1	Nibrin OS=Homo sapiens GN=NBN PE=1 SV=1 - [NBN_HUMAN]	O60934	T337	Nibrin (Cell cycle regulatory protein p95) (Nijmegen breakage syndrome protein 1)	NBN NBS NBS1 P95	STGLKTTTPGPSLSQ	0.970874	-0.0426443	0.868932	-0.202685	6530000	6730000	13260000	7.12254	116406	Atypical/PIKK/FRAP	FRAP	TTpTPGPSLSQGVSVDEK	1	T(1): 0.2; T(2): 4.1; T(3): 95.7; S(7): 0.0; S(9): 0.0; S(13): 0.0	113	Reverse	Class I
O60934	1	Nibrin OS=Homo sapiens GN=NBN PE=1 SV=1 - [NBN_HUMAN]	O60934	T434	Nibrin (Cell cycle regulatory protein p95) (Nijmegen breakage syndrome protein 1)	NBN NBS NBS1 P95	PNYQLSPTKLPSINK	1.41643	0.50226	1.26771	0.342219	27300000	19300000	46600000	7.66839	125964			IPNYQLSPpTKLPSINK	1	Y(4): 0.0; S(7): 3.4; T(9): 96.6; S(13): 0.0	235	Reverse	Class I
O60934	1	Nibrin OS=Homo sapiens GN=NBN PE=1 SV=1 - [NBN_HUMAN]	O60934	Y429	Nibrin (Cell cycle regulatory protein p95) (Nijmegen breakage syndrome protein 1)	NBN NBS NBS1 P95	AKMRIPNYQLSPTKL	1.29366	0.37146	1.15783	0.211419	5880000	4550000	10430000	7.01828	136100			IPNpYQLSPTKLPSINK	1	Y(4): 85.5; S(7): 7.3; T(9): 7.3; S(13): 0.0	80	Reverse	Class I
O60941	1	Dystrobrevin beta OS=Homo sapiens GN=DTNB PE=1 SV=1 - [DTNB_HUMAN]	O60941	S394	Dystrobrevin beta (DTN-B) (Beta-dystrobrevin)	DTNB	HCARVLDSPSRLDEE	1.20919	0.274041	1.08222	0.114	1260000	1040000	2300000	6.36173	165710			VLDpSPSRLDEEHR	1	S(4): 100.0; S(6): 0.0	115	Reverse	Class I
O75044	1	SLIT-ROBO Rho GTPase-activating protein 2 OS=Homo sapiens GN=SRGAP2 PE=1 SV=2 - [FNBP2_HUMAN]	O75044	S1013	SLIT-ROBO Rho GTPase-activating protein 2 (srGAP2) (Formin-binding protein 2) (Rho GTPase-activating protein 34)	SRGAP2 ARHGAP34 FNBP2 KIAA0456	PAFQRSASTAGDIAC	1.09529	0.131313	0.980285	-0.0287272	2430000	2220000	4650000	6.66745	56092			SApSTAGDIACAFRPVK	1	S(1): 1.5; S(3): 98.3; T(4): 0.2	96	Reverse	Class I
O75044	1	SLIT-ROBO Rho GTPase-activating protein 2 OS=Homo sapiens GN=SRGAP2 PE=1 SV=2 - [FNBP2_HUMAN]	O75044	S206	SLIT-ROBO Rho GTPase-activating protein 2 (srGAP2) (Formin-binding protein 2) (Rho GTPase-activating protein 34)	SRGAP2 ARHGAP34 FNBP2 KIAA0456	EDRQTPRSPDSTANV	1.02459	0.0350469	0.917008	-0.124993	17500000	17100000	34600000	7.53908	158655			QTPRpSPDSTANVR	1	T(2): 0.0; S(5): 100.0; S(8): 0.0; T(9): 0.0	182	Reverse	Class I
O75044	1	SLIT-ROBO Rho GTPase-activating protein 2 OS=Homo sapiens GN=SRGAP2 PE=1 SV=2 - [FNBP2_HUMAN]	O75044	S427	SLIT-ROBO Rho GTPase-activating protein 2 (srGAP2) (Formin-binding protein 2) (Rho GTPase-activating protein 34)	SRGAP2 ARHGAP34 FNBP2 KIAA0456	ESVKSTVSETFMSKP	1.24069	0.311148	1.11042	0.151108	18100000	14600000	32700000	7.51455	128352			STVpSETFMSKPSIAK	1	S(1): 0.4; T(2): 0.4; S(4): 99.2; T(6): 0.0; S(9): 0.0; S(12): 0.0	159	Reverse	Class I
O75044	1	SLIT-ROBO Rho GTPase-activating protein 2 OS=Homo sapiens GN=SRGAP2 PE=1 SV=2 - [FNBP2_HUMAN]	O75044	S900	SLIT-ROBO Rho GTPase-activating protein 2 (srGAP2) (Formin-binding protein 2) (Rho GTPase-activating protein 34)	SRGAP2 ARHGAP34 FNBP2 KIAA0456	CSISGHGSLNSISRH	0.673854	-0.569491	0.6031	-0.729532	497000	738000	1235000	6.09167	144616			CSISGHGpSLNSISR	1	S(2): 0.0; S(4): 0.7; S(8): 99.3; S(11): 0.0; S(13): 0.0	123	Reverse	Class I
O75051	1	Plexin-A2 OS=Homo sapiens GN=PLXNA2 PE=2 SV=2 - [PLXA2_HUMAN]	O75051	S1639	Plexin-A2 (Semaphorin receptor OCT)	PLXNA2 KIAA0463 OCT PLXN2 UNQ209/PRO235	SISRYDSSFRYTGSP	0.858369	-0.22033	0.76824	-0.38037	1290000	1510000	2800000	6.44716	131562			YDSpSFRYTGSPDSLR	1	Y(1): 0.7; S(3): 0.7; S(4): 98.5; Y(7): 0.0; T(8): 0.0; S(10): 0.0; S(13): 0.0	92	Reverse	Class I
O75096	1	Low-density lipoprotein receptor-related protein 4 OS=Homo sapiens GN=LRP4 PE=2 SV=2 - [LRP4_HUMAN]	O75096	S1201	Low-density lipoprotein receptor-related protein 4 (LRP-4) (Multiple epidermal growth factor-like domains 7)	LRP4 KIAA0816 LRP10 MEGF7	EVGNLDGSMRKVLVW	66.6667	6.05889	59.6667	5.89885	46100000	712000	46812000	7.67036	61603			IEVGNLDGpSMRK	1	S(9): 100.0	100	Reverse	Class I
O75113	1	NEDD4-binding protein 1 OS=Homo sapiens GN=N4BP1 PE=1 SV=3 - [N4BP1_HUMAN]	O75113	T242	NEDD4-binding protein 1 (N4BP1)	N4BP1 KIAA0615	EARNKAGTPVSELTK	0.974659	-0.0370307	0.87232	-0.197071	319000000	327000000	646000000	8.81023	115897			AGpTPVSELTK	1	T(3): 100.0; S(6): 0.0; T(9): 0.0	86	Reverse	Class I
O75116	1	Rho-associated protein kinase 2 OS=Homo sapiens GN=ROCK2 PE=1 SV=3 - [ROCK2_HUMAN]	O75116	S1362	Rho-associated protein kinase 2 (EC 2.7.11.1) (Rho kinase 2) (Rho-associated, coiled-coil-containing protein kinase 2) (Rho-associated, coiled-coil-containing protein kinase II) (ROCK-II) (p164 ROCK-2)	ROCK2 KIAA0619	PDPFARSSPRTSMKI	0.816993	-0.291604	0.731209	-0.451644	432000000	529000000	961000000	8.98272	169756	Atypical/PIKK/FRAP	FRAP	KPPAPDPFARSpSPR	1	S(11): 0.0; S(12): 100.0	154	Reverse	Class I
O75116	1	Rho-associated protein kinase 2 OS=Homo sapiens GN=ROCK2 PE=1 SV=3 - [ROCK2_HUMAN]	O75116	S1374	Rho-associated protein kinase 2 (EC 2.7.11.1) (Rho kinase 2) (Rho-associated, coiled-coil-containing protein kinase 2) (Rho-associated, coiled-coil-containing protein kinase II) (ROCK-II) (p164 ROCK-2)	ROCK2 KIAA0619	MKIQQNQSIRRPSRQ	1.23001	0.298673	1.10086	0.138632	4850000	3950000	8800000	6.94448	83171	AGC/PKC	PKCa	IQQNQpSIRRPSR	1	S(6): 100.0; S(11): 0.0	170	Reverse	Class I
O75116	1	Rho-associated protein kinase 2 OS=Homo sapiens GN=ROCK2 PE=1 SV=3 - [ROCK2_HUMAN]	O75116	S1379	Rho-associated protein kinase 2 (EC 2.7.11.1) (Rho kinase 2) (Rho-associated, coiled-coil-containing protein kinase 2) (Rho-associated, coiled-coil-containing protein kinase II) (ROCK-II) (p164 ROCK-2)	ROCK2 KIAA0619	NQSIRRPSRQLAPNK	2.1692	1.11716	1.94143	0.957121	8610000	3970000	12580000	7.09968	77659			RPpSRQLAPNKPS	1	S(3): 100.0; S(12): 0.0	157	Reverse	Class I
O75122	1	CLIP-associating protein 2 OS=Homo sapiens GN=CLASP2 PE=1 SV=2 - [CLAP2_HUMAN]	O75122	S1013	CLIP-associating protein 2 (Cytoplasmic linker-associated protein 2) (Protein Orbit homolog 2) (hOrbit2)	CLASP2 KIAA0627	HSMPTHSSPRSRDYN	1.19474	0.2567	1.0693	0.0966601	60900000	51000000	111900000	8.04883	72735			ASLLHSMPTHSpSPR	1	S(2): 0.0; S(6): 0.0; T(9): 0.0; S(11): 0.0; S(12): 100.0	322	Reverse	Class I
O75122	1	CLIP-associating protein 2 OS=Homo sapiens GN=CLASP2 PE=1 SV=2 - [CLAP2_HUMAN]	O75122	S313	CLIP-associating protein 2 (Cytoplasmic linker-associated protein 2) (Protein Orbit homolog 2) (hOrbit2)	CLASP2 KIAA0627	TYLKSSGSVASLPQS	0.564653	-0.824564	0.505364	-0.984605	7800000	13800000	21600000	7.33445	26334			SSGpSVASLPQSDR	1	S(1): 1.4; S(2): 10.1; S(4): 88.2; S(7): 0.2; S(11): 0.0	51	Reverse	Class I
O75122	1	CLIP-associating protein 2 OS=Homo sapiens GN=CLASP2 PE=1 SV=2 - [CLAP2_HUMAN]	O75122	S327	CLIP-associating protein 2 (Cytoplasmic linker-associated protein 2) (Protein Orbit homolog 2) (hOrbit2)	CLASP2 KIAA0627	SDRSSSSSQESLNRP	1.11111	0.152003	0.994444	-0.00803732	58300000	52400000	110700000	8.04415	51280	CK1	CK1d, CK1e	SSSSpSQESLNRPFSSK	1	S(1): 0.0; S(2): 0.0; S(3): 0.0; S(4): 0.0; S(5): 100.0; S(8): 0.0; S(14): 0.0; S(15): 0.0	301	Reverse	Class I
O75122	1	CLIP-associating protein 2 OS=Homo sapiens GN=CLASP2 PE=1 SV=2 - [CLAP2_HUMAN]	O75122	S360	CLIP-associating protein 2 (Cytoplasmic linker-associated protein 2) (Protein Orbit homolog 2) (hOrbit2)	CLASP2 KIAA0627	AGSSKASSLPGSLQR	0.912409	-0.132248	0.816606	-0.292288	17900000	19600000	37500000	7.57403	109448			ASpSLPGSLQR	1	S(2): 0.5; S(3): 99.5; S(7): 0.0	38	Reverse	Class I
O75122	1	CLIP-associating protein 2 OS=Homo sapiens GN=CLASP2 PE=1 SV=2 - [CLAP2_HUMAN]	O75122	S364	CLIP-associating protein 2 (Cytoplasmic linker-associated protein 2) (Protein Orbit homolog 2) (hOrbit2)	CLASP2 KIAA0627	KASSLPGSLQRSRSD	0.633714	-0.658097	0.567174	-0.818138	7230000	11400000	18630000	7.27021	96735			ASpSLPGpSLQR	2	S(2): 0.9; S(3): 99.2; S(7): 100.0	17	Reverse	Class I
O75122	1	CLIP-associating protein 2 OS=Homo sapiens GN=CLASP2 PE=1 SV=2 - [CLAP2_HUMAN]	O75122	S370	CLIP-associating protein 2 (Cytoplasmic linker-associated protein 2) (Protein Orbit homolog 2) (hOrbit2)	CLASP2 KIAA0627	GSLQRSRSDIDVNAA	1.07066	0.0985055	0.958244	-0.0615349	267000000	249000000	516000000	8.71265	50825			SRpSDIDVNAAAGAK	1	S(1): 0.0; S(3): 100.0	283	Reverse	Class I
O75122	1	CLIP-associating protein 2 OS=Homo sapiens GN=CLASP2 PE=1 SV=2 - [CLAP2_HUMAN]	O75122	S455	CLIP-associating protein 2 (Cytoplasmic linker-associated protein 2) (Protein Orbit homolog 2) (hOrbit2)	CLASP2 KIAA0627	RTKMVSQSQPGSRSG	1.05708	0.0800879	0.946089	-0.0799525	4330000	4100000	8430000	6.92583	97691			MVSQpSQPGpSRSGpSPGR	3	S(3): 0.0; S(5): 100.0; S(9): 100.0; S(11): 0.0; S(13): 100.0	243	Reverse	Class I
O75122	1	CLIP-associating protein 2 OS=Homo sapiens GN=CLASP2 PE=1 SV=2 - [CLAP2_HUMAN]	O75122	S459	CLIP-associating protein 2 (Cytoplasmic linker-associated protein 2) (Protein Orbit homolog 2) (hOrbit2)	CLASP2 KIAA0627	VSQSQPGSRSGSPGR	1.05708	0.0800879	0.946089	-0.0799525	4330000	4100000	8430000	6.92583	97691			MVSQpSQPGpSRSGpSPGR	3	S(3): 0.0; S(5): 100.0; S(9): 100.0; S(11): 0.0; S(13): 100.0	243	Reverse	Class I
O75122	1	CLIP-associating protein 2 OS=Homo sapiens GN=CLASP2 PE=1 SV=2 - [CLAP2_HUMAN]	O75122	S463	CLIP-associating protein 2 (Cytoplasmic linker-associated protein 2) (Protein Orbit homolog 2) (hOrbit2)	CLASP2 KIAA0627	QPGSRSGSPGRVLTT	1.05708	0.0800879	0.946089	-0.0799525	4330000	4100000	8430000	6.92583	97691			MVSQpSQPGpSRSGpSPGR	3	S(3): 0.0; S(5): 100.0; S(9): 100.0; S(11): 0.0; S(13): 100.0	243	Reverse	Class I
O75122	1	CLIP-associating protein 2 OS=Homo sapiens GN=CLASP2 PE=1 SV=2 - [CLAP2_HUMAN]	O75122	S499	CLIP-associating protein 2 (Cytoplasmic linker-associated protein 2) (Protein Orbit homolog 2) (hOrbit2)	CLASP2 KIAA0627	KRSKIPRSQGCSREA	1.10742	0.147202	0.991141	-0.0128383	2080000	1870000	3950000	6.5966	36916			IPRpSQGCpSREApSPSR	3	S(4): 100.0; S(8): 100.0; S(12): 99.7; S(14): 0.3	213	Reverse	Class I
O75122	1	CLIP-associating protein 2 OS=Homo sapiens GN=CLASP2 PE=1 SV=2 - [CLAP2_HUMAN]	O75122	S503	CLIP-associating protein 2 (Cytoplasmic linker-associated protein 2) (Protein Orbit homolog 2) (hOrbit2)	CLASP2 KIAA0627	IPRSQGCSREASPSR	1.10742	0.147202	0.991141	-0.0128383	2080000	1870000	3950000	6.5966	36916			IPRpSQGCpSREApSPSR	3	S(4): 100.0; S(8): 100.0; S(12): 99.7; S(14): 0.3	213	Reverse	Class I
O75122	1	CLIP-associating protein 2 OS=Homo sapiens GN=CLASP2 PE=1 SV=2 - [CLAP2_HUMAN]	O75122	S507	CLIP-associating protein 2 (Cytoplasmic linker-associated protein 2) (Protein Orbit homolog 2) (hOrbit2)	CLASP2 KIAA0627	QGCSREASPSRLSVA	1.10742	0.147202	0.991141	-0.0128383	2080000	1870000	3950000	6.5966	36916			IPRpSQGCpSREApSPSR	3	S(4): 100.0; S(8): 100.0; S(12): 99.7; S(14): 0.3	213	Reverse	Class I
O75122	1	CLIP-associating protein 2 OS=Homo sapiens GN=CLASP2 PE=1 SV=2 - [CLAP2_HUMAN]	O75122	S525	CLIP-associating protein 2 (Cytoplasmic linker-associated protein 2) (Protein Orbit homolog 2) (hOrbit2)	CLASP2 KIAA0627	RIPRPSVSQGCSREA	1.27389	0.349235	1.14013	0.189195	2250000	1770000	4020000	6.60423	37187			IPRPSVpSQGCpSR	2	S(5): 0.0; S(7): 100.0; S(11): 100.0	235	Reverse	Class I
O75122	1	CLIP-associating protein 2 OS=Homo sapiens GN=CLASP2 PE=1 SV=2 - [CLAP2_HUMAN]	O75122	S529	CLIP-associating protein 2 (Cytoplasmic linker-associated protein 2) (Protein Orbit homolog 2) (hOrbit2)	CLASP2 KIAA0627	PSVSQGCSREASRES	1.27389	0.349235	1.14013	0.189195	2250000	1770000	4020000	6.60423	37187			IPRPSVpSQGCpSR	2	S(5): 0.0; S(7): 100.0; S(11): 100.0	235	Reverse	Class I
O75122	1	CLIP-associating protein 2 OS=Homo sapiens GN=CLASP2 PE=1 SV=2 - [CLAP2_HUMAN]	O75122	S585	CLIP-associating protein 2 (Cytoplasmic linker-associated protein 2) (Protein Orbit homolog 2) (hOrbit2)	CLASP2 KIAA0627	QSSRLSSSVSAMRVL	1.06045	0.0846703	0.949099	-0.0753701	28300000	26700000	55000000	7.74036	112700			LSSpSVSAMR	1	S(2): 0.9; S(3): 7.4; S(4): 84.3; S(6): 7.4	37	Reverse	Class I
O75122	1	CLIP-associating protein 2 OS=Homo sapiens GN=CLASP2 PE=1 SV=2 - [CLAP2_HUMAN]	O75122	S596	CLIP-associating protein 2 (Cytoplasmic linker-associated protein 2) (Protein Orbit homolog 2) (hOrbit2)	CLASP2 KIAA0627	MRVLNTGSDVEEAVA	0.910747	-0.134878	0.815118	-0.294918	50000000	54900000	104900000	8.02078	163649			VLNTGpSDVEEAVADALKKPAR	1	T(4): 0.0; S(6): 100.0	232	Reverse	Class I
O75122	1	CLIP-associating protein 2 OS=Homo sapiens GN=CLASP2 PE=1 SV=2 - [CLAP2_HUMAN]	O75122	T1010	CLIP-associating protein 2 (Cytoplasmic linker-associated protein 2) (Protein Orbit homolog 2) (hOrbit2)	CLASP2 KIAA0627	SLLHSMPTHSSPRSR	1.12613	0.171368	1.00788	0.011328	7350000	6520000	13870000	7.14208	165130			ASLLHSMPpTHSSPR	1	S(2): 0.0; S(6): 0.0; T(9): 97.2; S(11): 1.4; S(12): 1.4	116	Reverse	Class I
O75131	1	Copine-3 OS=Homo sapiens GN=CPNE3 PE=1 SV=1 - [CPNE3_HUMAN]	O75131	S243	Copine-3 (Copine III)	CPNE3 CPN3 KIAA0636	LKEASRSSPVEFECI	1.08342	0.115597	0.969664	-0.044443	12400000	11400000	23800000	7.37658	52118			EASRSpSPVEFECINEK	1	S(3): 0.0; S(5): 0.0; S(6): 100.0	322	Reverse	Class I
O75132	1	Zinc finger BED domain-containing protein 4 OS=Homo sapiens GN=ZBED4 PE=2 SV=1 - [ZBED4_HUMAN]	O75132	S624	Zinc finger BED domain-containing protein 4	ZBED4 KIAA0637	SETARPSSPDTRVPR	1.21655	0.28279	1.08881	0.122749	7580000	6240000	13820000	7.14051	161899			TEVSETARPSpSPDTRVPR	1	T(1): 0.0; S(4): 0.0; T(6): 0.0; S(10): 0.2; S(11): 99.8; T(14): 0.0	107	Reverse	Class I
O75146	1	Huntingtin-interacting protein 1-related protein OS=Homo sapiens GN=HIP1R PE=1 SV=2 - [HIP1R_HUMAN]	O75146	S1045	Huntingtin-interacting protein 1-related protein (HIP1-related protein) (Huntingtin-interacting protein 12) (HIP-12)	HIP1R HIP12 KIAA0655	PPLAQKPSVAPRQDH	2.6455	1.40354	2.36772	1.2435	30900000	11700000	42600000	7.62941	165332			KPPLAQKPpSVAPR	1	S(9): 100.0	162	Reverse	Class I
O75151	1	PHD finger protein 2 OS=Homo sapiens GN=PHF2 PE=1 SV=3 - [PHF2_HUMAN]	O75151	S1061	Lysine-specific demethylase PHF2 (EC 1.14.11.-) (GRC5) (PHD finger protein 2)	PHF2 KIAA0662	FLTQRRPSASSPNNN	1.17925	0.237864	1.05542	0.0778234	1220000	1030000	2250000	6.35218	158409			RPpSASSPNNNTAAK	1	S(3): 100.0; S(5): 0.0; S(6): 0.0; T(11): 0.0	103	Reverse	Class I
O75151	1	PHD finger protein 2 OS=Homo sapiens GN=PHF2 PE=1 SV=3 - [PHF2_HUMAN]	O75151	S625	Lysine-specific demethylase PHF2 (EC 1.14.11.-) (GRC5) (PHD finger protein 2)	PHF2 KIAA0662	EEQKLEKSPLAGNKD	1.80832	0.854649	1.61844	0.694608	2900000	1600000	4500000	6.65321	162043			MEEEQKLEKpSPLAGNK	1	S(10): 100.0	151	Reverse	Class I
O75151	1	PHD finger protein 2 OS=Homo sapiens GN=PHF2 PE=1 SV=3 - [PHF2_HUMAN]	O75151	S655	Lysine-specific demethylase PHF2 (EC 1.14.11.-) (GRC5) (PHD finger protein 2)	PHF2 KIAA0662	KALRPPTSPGVFGAL	1.68919	0.756331	1.51182	0.596291	15800000	9340000	25140000	7.40037	138524			ALRPPTpSPGVFGALQNFK	1	T(6): 3.4; S(7): 96.6	68	Reverse	Class I
O75151	1	PHD finger protein 2 OS=Homo sapiens GN=PHF2 PE=1 SV=3 - [PHF2_HUMAN]	O75151	S705	Lysine-specific demethylase PHF2 (EC 1.14.11.-) (GRC5) (PHD finger protein 2)	PHF2 KIAA0662	NAPKRDLSFLLDKKA	1.77936	0.831358	1.59253	0.671318	705000	396000	1101000	6.04179	79991			RDLpSFLLDKK	1	S(4): 100.0	145	Reverse	Class I
O75151	1	PHD finger protein 2 OS=Homo sapiens GN=PHF2 PE=1 SV=3 - [PHF2_HUMAN]	O75151	S882	Lysine-specific demethylase PHF2 (EC 1.14.11.-) (GRC5) (PHD finger protein 2)	PHF2 KIAA0662	YVYPSLESDEDNPIF	1.3947	0.479955	1.24826	0.319915	12900000	9240000	22140000	7.34518	21242			DSDYVYPSLEpSDEDNPIFK	1	S(2): 0.0; Y(4): 0.0; Y(6): 0.0; S(8): 0.0; S(11): 100.0	93	Reverse	Class I
O75151	1	PHD finger protein 2 OS=Homo sapiens GN=PHF2 PE=1 SV=3 - [PHF2_HUMAN]	O75151	Y877	Lysine-specific demethylase PHF2 (EC 1.14.11.-) (GRC5) (PHD finger protein 2)	PHF2 KIAA0662	FKDSDYVYPSLESDE	1.37363	0.45799	1.2294	0.297949	7010000	5100000	12110000	7.08314	101925			DSDYVpYPSLESDEDNPIFK	1	S(2): 0.0; Y(4): 0.0; Y(6): 100.0; S(8): 0.0; S(11): 0.0	167	Reverse	Class I
O75152	1	Zinc finger CCCH domain-containing protein 11A OS=Homo sapiens GN=ZC3H11A PE=1 SV=3 - [ZC11A_HUMAN]	O75152	S108	Zinc finger CCCH domain-containing protein 11A	ZC3H11A KIAA0663 ZC3HDC11A	VLPTVPESPEEEVKA	1.15741	0.210897	1.03588	0.0508564	40100000	34700000	74800000	7.8739	28806			TVLPTVPEpSPEEEVK	1	T(1): 0.0; T(5): 0.0; S(9): 100.0	127	Reverse	Class I
O75152	1	Zinc finger CCCH domain-containing protein 11A OS=Homo sapiens GN=ZC3H11A PE=1 SV=3 - [ZC11A_HUMAN]	O75152	S132	Zinc finger CCCH domain-containing protein 11A	ZC3H11A KIAA0663 ZC3HDC11A	LSVQSNPSPQLRSVM	0.899281	-0.153157	0.804856	-0.313197	5720000	6360000	12080000	7.08207	23296			LSVQSNPpSPQLR	1	S(2): 0.0; S(5): 0.0; S(8): 100.0	160	Reverse	Class I
O75152	1	Zinc finger CCCH domain-containing protein 11A OS=Homo sapiens GN=ZC3H11A PE=1 SV=3 - [ZC11A_HUMAN]	O75152	T321	Zinc finger CCCH domain-containing protein 11A	ZC3H11A KIAA0663 ZC3HDC11A	PETNIDKTPKKAQVS	1.28866	0.365871	1.15335	0.205831	2470000	1920000	4390000	6.64246	165415			KVEAPETNIDKpTPK	1	T(7): 0.0; T(12): 100.0	146	Reverse	Class I
O75153	1	Putative eukaryotic translation initiation factor 3 subunit OS=Homo sapiens GN=KIAA0664 PE=1 SV=2 - [EIF3X_HUMAN]	O75153	S664	Protein KIAA0664	KIAA0664	PPGQEAGSEEEGSSA	0.963391	-0.0538064	0.862235	-0.213847	11100000	11500000	22600000	7.35411	114067			SEDPPGQEAGpSEEEGSSASGLAK	1	S(1): 0.0; S(11): 100.0; S(16): 0.0; S(17): 0.0; S(19): 0.0	115	Reverse	Class I
O75159	1	Suppressor of cytokine signaling 5 OS=Homo sapiens GN=SOCS5 PE=2 SV=1 - [SOCS5_HUMAN]	O75159	T184	Suppressor of cytokine signaling 5 (SOCS-5) (Cytokine-inducible SH2 protein 6) (CIS-6) (Cytokine-inducible SH2-containing protein 5)	SOCS5 CIS6 CISH5 CISH6 KIAA0671	LRQRLQDTVGLCFPM	0.638162	-0.648005	0.571155	-0.808046	3240000	5070000	8310000	6.9196	150185			LQDpTVGLCFPMR	1	T(4): 100.0	94	Reverse	Class I
O75161	1	Nephrocystin-4 OS=Homo sapiens GN=NPHP4 PE=1 SV=2 - [NPHP4_HUMAN]	O75161	S142	Nephrocystin-4 (Nephroretinin)	NPHP4 KIAA0673	IFSNQPDSPISASQD	0.946074	-0.0799754	0.846736	-0.240016	3040000	3210000	6250000	6.79588	115971			IFSNQPDpSPISASQDK	1	S(3): 0.0; S(8): 100.0; S(11): 0.0; S(13): 0.0	98	Reverse	Class I
O75164	1	JmjC domain-containing histone demethylation protein 3A OS=Homo sapiens GN=JMJD2A PE=1 SV=1 - [JHD3A_HUMAN]	O75164	S523	Lysine-specific demethylase 4A (EC 1.14.11.-) (JmjC domain-containing histone demethylation protein 3A) (Jumonji domain-containing protein 2A)	KDM4A JHDM3A JMJD2 JMJD2A KIAA0677	SSRDSISSDSETSEP	0.978474	-0.0313952	0.875734	-0.191436	12400000	12600000	25000000	7.39794	100272			DSISpSDSETSEPLSCR	1	S(2): 0.0; S(4): 0.5; S(5): 99.5; S(7): 0.0; T(9): 0.0; S(10): 0.0; S(14): 0.0	206	Reverse	Class I
O75167	1	Phosphatase and actin regulator 2 OS=Homo sapiens GN=PHACTR2 PE=1 SV=2 - [PHAR2_HUMAN]	O75167	S23	Phosphatase and actin regulator 2	PHACTR2 C6orf56 KIAA0680	SDGPTAGSQTPPFKR	1.0582	0.0816138	0.94709	-0.0784266	78100000	73800000	151900000	8.18156	23663			ASIANSDGPTAGpSQTPPFK	1	S(2): 0.0; S(6): 0.0; T(10): 0.0; S(13): 99.2; T(15): 0.8	248	Reverse	Class I
O75167	1	Phosphatase and actin regulator 2 OS=Homo sapiens GN=PHACTR2 PE=1 SV=2 - [PHAR2_HUMAN]	O75167	S237	Phosphatase and actin regulator 2	PHACTR2 C6orf56 KIAA0680	TGSKASASPSTSSTS	0.98912	-0.015783	0.885262	-0.175823	98300000	99300000	197600000	8.29579	132948			ASApSPSTSSTSSRPK	1	S(2): 0.0; S(4): 100.0; S(6): 0.0; T(7): 0.0; S(8): 0.0; S(9): 0.0; T(10): 0.0; S(11): 0.0; S(12): 0.0	252	Reverse	Class I
O75167	1	Phosphatase and actin regulator 2 OS=Homo sapiens GN=PHACTR2 PE=1 SV=2 - [PHAR2_HUMAN]	O75167	S35	Phosphatase and actin regulator 2	PHACTR2 C6orf56 KIAA0680	FKRKGKLSTIGKIFK	1.77305	0.826233	1.58688	0.666193	934000	526000	1460000	6.16435	159381			GKLpSTIGK	1	S(4): 98.7; T(5): 1.3	63	Reverse	Class I
O75167	1	Phosphatase and actin regulator 2 OS=Homo sapiens GN=PHACTR2 PE=1 SV=2 - [PHAR2_HUMAN]	O75167	S522	Phosphatase and actin regulator 2	PHACTR2 C6orf56 KIAA0680	TKLVRRLSQRPTTEE	0.728332	-0.457332	0.651857	-0.617372	37400000	51300000	88700000	7.94792	78544			RLpSQRPTTEELEQR	1	S(3): 100.0; T(7): 0.0; T(8): 0.0	249	Reverse	Class I
O75167	1	Phosphatase and actin regulator 2 OS=Homo sapiens GN=PHACTR2 PE=1 SV=2 - [PHAR2_HUMAN]	O75167	S560	Phosphatase and actin regulator 2	PHACTR2 C6orf56 KIAA0680	RRLSRKLSLRPTVAE	0.735294	-0.443607	0.658088	-0.603647	12000000	16300000	28300000	7.45179	163496			KLpSLRPTVAELQAR	1	S(3): 100.0; T(7): 0.0	175	Reverse	Class I
O75167	1	Phosphatase and actin regulator 2 OS=Homo sapiens GN=PHACTR2 PE=1 SV=2 - [PHAR2_HUMAN]	O75167	T20	Phosphatase and actin regulator 2	PHACTR2 C6orf56 KIAA0680	IANSDGPTAGSQTPP	1.15207	0.204233	1.03111	0.0441926	23900000	20800000	44700000	7.65031	109974			ASIANSDGPpTAGSQTPPFK	1	S(2): 0.0; S(6): 0.0; T(10): 98.9; S(13): 0.5; T(15): 0.5	163	Reverse	Class I
O75167	1	Phosphatase and actin regulator 2 OS=Homo sapiens GN=PHACTR2 PE=1 SV=2 - [PHAR2_HUMAN]	O75167	T25	Phosphatase and actin regulator 2	PHACTR2 C6orf56 KIAA0680	GPTAGSQTPPFKRKG	1	0	0.895	-0.16004	277000000	277000000	554000000	8.74351	27717			ASIANSDGPTAGSQpTPPFK	1	S(2): 0.0; S(6): 0.0; T(10): 0.0; S(13): 0.0; T(15): 100.0	87	Reverse	Class I
O75167	1	Phosphatase and actin regulator 2 OS=Homo sapiens GN=PHACTR2 PE=1 SV=2 - [PHAR2_HUMAN]	O75167	T564	Phosphatase and actin regulator 2	PHACTR2 C6orf56 KIAA0680	RKLSLRPTVAELQAR	0.735294	-0.443607	0.658088	-0.603647	12000000	16300000	28300000	7.45179	163496			KLSLRPpTVAELQAR	1	S(3): 0.4; T(7): 99.6	55	Reverse	Class I
O75170	1	SAPS domain family member 2 OS=Homo sapiens GN=SAPS2 PE=1 SV=2 - [SAPS2_HUMAN]	O75170	S289	Serine/threonine-protein phosphatase 6 regulatory subunit 2 (SAPS domain family member 2)	PPP6R2 KIAA0685 PP6R2 SAPS2	GTEGLVDSFSQGLER	1.11982	0.163268	1.00224	0.00322751	5860000	5230000	11090000	7.04493	146377			RVGTEGLVDpSFSQGLER	1	T(4): 0.0; S(10): 100.0; S(12): 0.0	221	Reverse	Class I
O75170	1	SAPS domain family member 2 OS=Homo sapiens GN=SAPS2 PE=1 SV=2 - [SAPS2_HUMAN]	O75170	S771	Serine/threonine-protein phosphatase 6 regulatory subunit 2 (SAPS domain family member 2)	PPP6R2 KIAA0685 PP6R2 SAPS2	ESGPRCSSPVDTECS	1.11111	0.152003	0.994444	-0.00803732	2510000	2260000	4770000	6.67852	129181			CSpSPVDTECSHAEGSR	1	S(2): 0.3; S(3): 99.7; T(7): 0.0; S(10): 0.0; S(15): 0.0	288	Reverse	Class I
O75175	1	CCR4-NOT transcription complex subunit 3 OS=Homo sapiens GN=CNOT3 PE=1 SV=1 - [CNOT3_HUMAN]	O75175	S299	CCR4-NOT transcription complex subunit 3 (CCR4-associated factor 3) (Leukocyte receptor cluster member 2)	CNOT3 KIAA0691 LENG2 NOT3	TDSEVSQSPAKNGSK	1.34409	0.426625	1.20296	0.266585	4550000	3380000	7930000	6.89927	107932			STDSEVSQpSPAK	1	S(1): 0.0; T(2): 0.0; S(4): 0.0; S(7): 1.3; S(9): 98.7	118	Reverse	Class I
O75179	1	Ankyrin repeat domain-containing protein 17 OS=Homo sapiens GN=ANKRD17 PE=1 SV=3 - [ANR17_HUMAN]	O75179	S1709	Ankyrin repeat domain-containing protein 17 (Gene trap ankyrin repeat protein) (Serologically defined breast cancer antigen NY-BR-16)	ANKRD17 GTAR KIAA0697	NGKLTVASPKRGQKR	1.04822	0.0679388	0.938155	-0.0921016	228000000	217000000	445000000	8.64836	22447	CMGC/CDK/CDC2	CDK2	LTVApSPK	1	T(2): 0.0; S(5): 100.0	101	Reverse	Class I
O75179	1	Ankyrin repeat domain-containing protein 17 OS=Homo sapiens GN=ANKRD17 PE=1 SV=3 - [ANR17_HUMAN]	O75179	S2065	Ankyrin repeat domain-containing protein 17 (Gene trap ankyrin repeat protein) (Serologically defined breast cancer antigen NY-BR-16)	ANKRD17 GTAR KIAA0697	NSPLDCGSASPNKVA	0.951475	-0.0717627	0.85157	-0.231803	21600000	22700000	44300000	7.6464	113883			NSPLDCGpSASPNK	1	S(2): 0.0; S(8): 92.9; S(10): 7.1	36	Reverse	Class I
O75179	1	Ankyrin repeat domain-containing protein 17 OS=Homo sapiens GN=ANKRD17 PE=1 SV=3 - [ANR17_HUMAN]	O75179	S2067	Ankyrin repeat domain-containing protein 17 (Gene trap ankyrin repeat protein) (Serologically defined breast cancer antigen NY-BR-16)	ANKRD17 GTAR KIAA0697	PLDCGSASPNKVASS	1.10742	0.147202	0.991141	-0.0128383	69400000	62700000	132100000	8.1209	26262	CMGC/CDK/CDC2	CDK2	NSPLDCGSApSPNK	1	S(2): 0.0; S(8): 6.3; S(10): 93.7	81	Reverse	Class I
O75179	1	Ankyrin repeat domain-containing protein 17 OS=Homo sapiens GN=ANKRD17 PE=1 SV=3 - [ANR17_HUMAN]	O75179	S2401	Ankyrin repeat domain-containing protein 17 (Gene trap ankyrin repeat protein) (Serologically defined breast cancer antigen NY-BR-16)	ANKRD17 GTAR KIAA0697	SSGVRAPSPAPSSVP	1.01523	0.0218044	0.908629	-0.138236	71900000	70800000	142700000	8.15442	127842	CMGC/CDK/CDC2	CDK2	APpSPAPSSVPLGSEKPSNVSQDR	1	S(3): 100.0; S(7): 0.0; S(8): 0.0; S(13): 0.0; S(17): 0.0; S(20): 0.0	162	Reverse	Class I
O75182	1	Paired amphipathic helix protein Sin3b OS=Homo sapiens GN=SIN3B PE=1 SV=2 - [SIN3B_HUMAN]	O75182	S740	Paired amphipathic helix protein Sin3b (Histone deacetylase complex subunit Sin3b) (Transcriptional corepressor Sin3b)	SIN3B KIAA0700	PAPGPHSSPPEEKGA	1.27877	0.354759	1.1445	0.194719	24400000	19100000	43500000	7.63849	90207			KKPAPGPHSpSPPEEK	1	S(9): 0.6; S(10): 99.4	156	Reverse	Class I
O75190	1	DnaJ homolog subfamily B member 6 OS=Homo sapiens GN=DNAJB6 PE=1 SV=2 - [DNJB6_HUMAN]	O75190	S277	DnaJ homolog subfamily B member 6 (HHDJ1) (Heat shock protein J2) (HSJ-2) (MRJ) (MSJ-1)	DNAJB6 HSJ2 MRJ MSJ1	RHAPHCLSEEEGEQD	2.46914	1.30401	2.20988	1.14397	15900000	6420000	22320000	7.34869	93413	STE/STE-Unique/NIK	NIK	HAPHCLpSEEEGEQDRPR	1	S(7): 100.0	253	Reverse	Class I
O75351	1	Vacuolar protein sorting-associating protein 4B OS=Homo sapiens GN=VPS4B PE=1 SV=2 - [VPS4B_HUMAN]	O75351	S102	Vacuolar protein sorting-associated protein 4B (Cell migration-inducing gene 1 protein) (Suppressor of K(+) transport growth defect 1) (Protein SKD1)	VPS4B SKD1 VPS42 MIG1	ADEKGNDSDGEGESD	0.880282	-0.183963	0.787852	-0.344003	116000000	132000000	248000000	8.39445	141168	CMGC/DYRK	HIPK2	EGQPSPADEKGNDpSDGEGESDDPEKK	1	S(5): 0.0; S(14): 100.0; S(20): 0.0	194	Reverse	Class I
O75362	1	Zinc finger protein 217 OS=Homo sapiens GN=ZNF217 PE=1 SV=1 - [ZN217_HUMAN]	O75362	S407	Zinc finger protein 217	ZNF217 ZABC1	DRRAGAESPTMSVDG	1.03093	0.0439433	0.92268	-0.116097	14900000	14500000	29400000	7.46835	22684	CMGC/DYRK	HIPK2	AGAEpSPTMSVDGR	1	S(5): 100.0; T(7): 0.0; S(9): 0.0	207	Reverse	Class I
O75362	1	Zinc finger protein 217 OS=Homo sapiens GN=ZNF217 PE=1 SV=1 - [ZN217_HUMAN]	O75362	S848	Zinc finger protein 217	ZNF217 ZABC1	MFPKTSVSPAPDKTK	1.08225	0.114035	0.968615	-0.0460052	3090000	2860000	5950000	6.77452	108052	CMGC/CDK	CDK4, CDK6	TSVpSPAPDK	1	T(1): 0.0; S(2): 0.0; S(4): 100.0	48	Reverse	Class I
O75367	1	Core histone macro-H2A.1 OS=Homo sapiens GN=H2AFY PE=1 SV=4 - [H2AY_HUMAN]	O75367	S170	Core histone macro-H2A.1 (Histone macroH2A1) (mH2A1) (Histone H2A.y) (H2A/y) (Medulloblastoma antigen MU-MB-50.205)	H2AFY MACROH2A1	GEVSKAASADSTTEG	1.24844	0.320126	1.11735	0.160085	7230000	5790000	13020000	7.11461	97315	CAMK/CAMKL/CHK1	CHK1	AApSADpSTTEGTPADGFTVLSTK	2	S(3): 100.0; S(6): 99.4; T(7): 0.6; T(8): 0.0; T(11): 0.0; T(17): 0.0; S(20): 0.0; T(21): 0.0	291	Reverse	Class I
O75367	1	Core histone macro-H2A.1 OS=Homo sapiens GN=H2AFY PE=1 SV=4 - [H2AY_HUMAN]	O75367	S173	Core histone macro-H2A.1 (Histone macroH2A1) (mH2A1) (Histone H2A.y) (H2A/y) (Medulloblastoma antigen MU-MB-50.205)	H2AFY MACROH2A1	SKAASADSTTEGTPA	1.11732	0.16004	1	0	9020000	8070000	17090000	7.23274	106289	CK1	VRK1	AASADpSTTEGTPADGFTVLSTK	1	S(3): 0.0; S(6): 95.5; T(7): 4.3; T(8): 0.2; T(11): 0.0; T(17): 0.0; S(20): 0.0; T(21): 0.0	193	Reverse	Class I
O75367	1	Core histone macro-H2A.1 OS=Homo sapiens GN=H2AFY PE=1 SV=4 - [H2AY_HUMAN]	O75367	T129	Core histone macro-H2A.1 (Histone macroH2A1) (mH2A1) (Histone H2A.y) (H2A/y) (Medulloblastoma antigen MU-MB-50.205)	H2AFY MACROH2A1	GKLEAIITPPPAKKA	1.03093	0.0439433	0.92268	-0.116097	15300000	14900000	30200000	7.48001	162907	CMGC/CDK/CDC2	CDK2	GKLEAIIpTPPPAKK	1	T(8): 100.0	150	Reverse	Class I
O75369	1	Filamin-B OS=Homo sapiens GN=FLNB PE=1 SV=1 - [FLNB_HUMAN]	O75369	S1433	Filamin-B (FLN-B) (ABP-278) (ABP-280 homolog) (Actin-binding-like protein) (Beta-filamin) (Filamin homolog 1) (Fh1) (Filamin-3) (Thyroid autoantigen) (Truncated actin-binding protein) (Truncated ABP)	FLNB FLN1L FLN3 TABP TAP	IAGPGLGSGVRARVL	1.43885	0.524915	1.28777	0.364875	12800000	8920000	21720000	7.33686	116115	STE/STE11	MAP3K1	IAGPGLGpSGVR	1	S(8): 100.0	27	Reverse	Class I
O75369	1	Filamin-B OS=Homo sapiens GN=FLNB PE=1 SV=1 - [FLNB_HUMAN]	O75369	S1505	Filamin-B (FLN-B) (ABP-278) (ABP-280 homolog) (Actin-binding-like protein) (Beta-filamin) (Filamin homolog 1) (Fh1) (Filamin-3) (Thyroid autoantigen) (Truncated actin-binding protein) (Truncated ABP)	FLNB FLN1L FLN3 TABP TAP	ADEEIPRSPFKVKVL	1.06838	0.0954196	0.956197	-0.0646208	143000000	134000000	277000000	8.44248	52261			YADEEIPRpSPFK	1	Y(1): 0.0; S(9): 100.0	274	Reverse	Class I
O75369	1	Filamin-B OS=Homo sapiens GN=FLNB PE=1 SV=1 - [FLNB_HUMAN]	O75369	S2107	Filamin-B (FLN-B) (ABP-278) (ABP-280 homolog) (Actin-binding-like protein) (Beta-filamin) (Filamin homolog 1) (Fh1) (Filamin-3) (Thyroid autoantigen) (Truncated actin-binding protein) (Truncated ABP)	FLNB FLN1L FLN3 TABP TAP	TRTSRAPSVATVGSI	1.22549	0.293359	1.09681	0.133319	60400000	49300000	109700000	8.04021	56128			TSRAPpSVATVGSICDLNLK	1	T(1): 0.0; S(2): 0.0; S(6): 100.0; T(9): 0.0; S(12): 0.0	398	Reverse	Class I
O75369	1	Filamin-B OS=Homo sapiens GN=FLNB PE=1 SV=1 - [FLNB_HUMAN]	O75369	S2135	Filamin-B (FLN-B) (ABP-278) (ABP-280 homolog) (Actin-binding-like protein) (Beta-filamin) (Filamin homolog 1) (Fh1) (Filamin-3) (Thyroid autoantigen) (Truncated actin-binding protein) (Truncated ABP)	FLNB FLN1L FLN3 TABP TAP	DMSAHVTSPSGRVTE	1.20048	0.263612	1.07443	0.103571	11100000	9240000	20340000	7.30835	44901			IPEINSSDMSAHVTpSPSGR	1	S(6): 0.0; S(7): 0.0; S(10): 0.0; T(14): 0.4; S(15): 99.2; S(17): 0.4	204	Reverse	Class I
O75369	1	Filamin-B OS=Homo sapiens GN=FLNB PE=1 SV=1 - [FLNB_HUMAN]	O75369	S2465	Filamin-B (FLN-B) (ABP-278) (ABP-280 homolog) (Actin-binding-like protein) (Beta-filamin) (Filamin homolog 1) (Fh1) (Filamin-3) (Thyroid autoantigen) (Truncated actin-binding protein) (Truncated ABP)	FLNB FLN1L FLN3 TABP TAP	GPNHIVGSPFKAKVT	1.15741	0.210897	1.03588	0.0508564	12100000	10500000	22600000	7.35411	61225			YGGPNHIVGpSPFK	1	Y(1): 0.0; S(10): 100.0	298	Reverse	Class I
O75369	1	Filamin-B OS=Homo sapiens GN=FLNB PE=1 SV=1 - [FLNB_HUMAN]	O75369	S2481	Filamin-B (FLN-B) (ABP-278) (ABP-280 homolog) (Actin-binding-like protein) (Beta-filamin) (Filamin homolog 1) (Fh1) (Filamin-3) (Thyroid autoantigen) (Truncated actin-binding protein) (Truncated ABP)	FLNB FLN1L FLN3 TABP TAP	QRLVSPGSANETSSI	1.24378	0.314733	1.11318	0.154692	2260000	1820000	4080000	6.61066	106991			LVSPGpSANETSSILVESVTR	1	S(3): 0.1; S(6): 98.0; T(10): 0.9; S(11): 0.9; S(12): 0.1; S(17): 0.0; T(19): 0.0	84	Reverse	Class I
O75369	1	Filamin-B OS=Homo sapiens GN=FLNB PE=1 SV=1 - [FLNB_HUMAN]	O75369	S842	Filamin-B (FLN-B) (ABP-278) (ABP-280 homolog) (Actin-binding-like protein) (Beta-filamin) (Filamin homolog 1) (Fh1) (Filamin-3) (Thyroid autoantigen) (Truncated actin-binding protein) (Truncated ABP)	FLNB FLN1L FLN3 TABP TAP	FRVKVDPSHDASKVK	0.953289	-0.0690147	0.853194	-0.229055	2410000	2530000	4940000	6.69373	164216			VKVDPpSHDASK	1	S(6): 100.0; S(10): 0.0	119	Reverse	Class I
O75369	1	Filamin-B OS=Homo sapiens GN=FLNB PE=1 SV=1 - [FLNB_HUMAN]	O75369	S983	Filamin-B (FLN-B) (ABP-278) (ABP-280 homolog) (Actin-binding-like protein) (Beta-filamin) (Filamin homolog 1) (Fh1) (Filamin-3) (Thyroid autoantigen) (Truncated actin-binding protein) (Truncated ABP)	FLNB FLN1L FLN3 TABP TAP	KLDVTILSPSRKVVP	0.998004	-0.00288251	0.893214	-0.162923	6660000	6670000	13330000	7.12483	55732	STE/STE11	MAP3K1	LDVTILpSPSRK	1	T(4): 0.0; S(7): 99.4; S(9): 0.6	129	Reverse	Class I
O75369	1	Filamin-B OS=Homo sapiens GN=FLNB PE=1 SV=1 - [FLNB_HUMAN]	O75369	T1609	Filamin-B (FLN-B) (ABP-278) (ABP-280 homolog) (Actin-binding-like protein) (Beta-filamin) (Filamin homolog 1) (Fh1) (Filamin-3) (Thyroid autoantigen) (Truncated actin-binding protein) (Truncated ABP)	FLNB FLN1L FLN3 TABP TAP	SPYRIRATQTGDASK	1.01317	0.018878	0.906788	-0.141162	3940000	3890000	7830000	6.89376	158558			IRApTQTGDASK	1	T(4): 99.3; T(6): 0.7; S(10): 0.0	168	Reverse	Class I
O75369	1	Filamin-B OS=Homo sapiens GN=FLNB PE=1 SV=1 - [FLNB_HUMAN]	O75369	T2110	Filamin-B (FLN-B) (ABP-278) (ABP-280 homolog) (Actin-binding-like protein) (Beta-filamin) (Filamin homolog 1) (Fh1) (Filamin-3) (Thyroid autoantigen) (Truncated actin-binding protein) (Truncated ABP)	FLNB FLN1L FLN3 TABP TAP	SRAPSVATVGSICDL	1.45985	0.545824	1.30657	0.385784	41200000	28200000	69400000	7.84136	29769			APSVApTVGSICDLNLK	1	S(3): 5.3; T(6): 94.6; S(9): 0.0	116	Reverse	Class I
O75369	1	Filamin-B OS=Homo sapiens GN=FLNB PE=1 SV=1 - [FLNB_HUMAN]	O75369	T519	Filamin-B (FLN-B) (ABP-278) (ABP-280 homolog) (Actin-binding-like protein) (Beta-filamin) (Filamin homolog 1) (Fh1) (Filamin-3) (Thyroid autoantigen) (Truncated actin-binding protein) (Truncated ABP)	FLNB FLN1L FLN3 TABP TAP	AFEYYPSTPGRYSIA	1.14416	0.194295	1.02403	0.0342544	42600000	37200000	79800000	7.902	16021			DFLDGVYAFEYYPSpTPGR	1	Y(7): 0.0; Y(11): 0.0; Y(12): 0.0; S(14): 0.3; T(15): 99.7	277	Reverse	Class I
O75369	1	Filamin-B OS=Homo sapiens GN=FLNB PE=1 SV=1 - [FLNB_HUMAN]	O75369	Y511	Filamin-B (FLN-B) (ABP-278) (ABP-280 homolog) (Actin-binding-like protein) (Beta-filamin) (Filamin homolog 1) (Fh1) (Filamin-3) (Thyroid autoantigen) (Truncated actin-binding protein) (Truncated ABP)	FLNB FLN1L FLN3 TABP TAP	KDFLDGVYAFEYYPS	1.21212	0.277534	1.08485	0.117494	18900000	15600000	34500000	7.53782	15923			DFLDGVpYAFEYYPSTPGR	1	Y(7): 99.0; Y(11): 1.0; Y(12): 0.0; S(14): 0.0; T(15): 0.0	177	Reverse	Class I
O75376	1	Nuclear receptor corepressor 1 OS=Homo sapiens GN=NCOR1 PE=1 SV=2 - [NCOR1_HUMAN]	O75376	S1111	Nuclear receptor corepressor 1 (N-CoR) (N-CoR1)	NCOR1 KIAA1047	YIKQEEFSPRSQNSQ	0.598802	-0.739848	0.535928	-0.899889	15800000	26300000	42100000	7.62428	56006	CMGC/CDK/CDC2	CDK2	SATLPYIKQEEFpSPR	1	S(1): 0.0; T(3): 0.0; Y(6): 0.0; S(13): 100.0	302	Reverse	Class I
O75376	1	Nuclear receptor corepressor 1 OS=Homo sapiens GN=NCOR1 PE=1 SV=2 - [NCOR1_HUMAN]	O75376	S1263	Nuclear receptor corepressor 1 (N-CoR) (N-CoR1)	NCOR1 KIAA1047	QGMSMRESPVSAPLE	0.992063	-0.0114956	0.887897	-0.171536	17900000	18100000	36000000	7.5563	56209			QGMSMREpSPVSAPLEGLICR	1	S(4): 1.1; S(8): 98.9; S(11): 0.0	199	Reverse	Class I
O75376	1	Nuclear receptor corepressor 1 OS=Homo sapiens GN=NCOR1 PE=1 SV=2 - [NCOR1_HUMAN]	O75376	S1281	Nuclear receptor corepressor 1 (N-CoR) (N-CoR1)	NCOR1 KIAA1047	CRALPRGSPHSDLKE	1.02987	0.0424568	0.92173	-0.117584	83500000	81100000	164600000	8.21643	72802			ALPRGpSPHSDLK	1	S(6): 99.9; S(9): 0.1	241	Reverse	Class I
O75376	1	Nuclear receptor corepressor 1 OS=Homo sapiens GN=NCOR1 PE=1 SV=2 - [NCOR1_HUMAN]	O75376	S1322	Nuclear receptor corepressor 1 (N-CoR) (N-CoR1)	NCOR1 KIAA1047	PKQIKRESPPIRAFE	1.04932	0.0694519	0.93914	-0.0905885	16900000	16100000	33000000	7.51851	83517			QIKREpSPPIR	1	S(6): 100.0	166	Reverse	Class I
O75376	1	Nuclear receptor corepressor 1 OS=Homo sapiens GN=NCOR1 PE=1 SV=2 - [NCOR1_HUMAN]	O75376	S1472	Nuclear receptor corepressor 1 (N-CoR) (N-CoR1)	NCOR1 KIAA1047	EAPKAQLSPGIYDDT	1.15207	0.204233	1.03111	0.0441926	107000000	92800000	199800000	8.3006	117171	CMGC/DYRK	HIPK2, PRP4	AQLpSPGIYDDTSAR	1	S(4): 100.0; Y(8): 0.0; T(11): 0.0; S(12): 0.0	181	Reverse	Class I
O75376	1	Nuclear receptor corepressor 1 OS=Homo sapiens GN=NCOR1 PE=1 SV=2 - [NCOR1_HUMAN]	O75376	S1533	Nuclear receptor corepressor 1 (N-CoR) (N-CoR1)	NCOR1 KIAA1047	RESIPAKSPVPGVDP	1.40056	0.486004	1.2535	0.325964	9000000	6430000	15430000	7.18837	91024	Atypical/PIKK/FRAP	FRAP	ESIPAKpSPVPGVDPVVSHSPFDPHHR	1	S(2): 0.0; S(7): 100.0; S(17): 0.0; S(19): 0.0	134	Reverse	Class I
O75376	1	Nuclear receptor corepressor 1 OS=Homo sapiens GN=NCOR1 PE=1 SV=2 - [NCOR1_HUMAN]	O75376	S158	Nuclear receptor corepressor 1 (N-CoR) (N-CoR1)	NCOR1 KIAA1047	GKHEAPSSPISGQPC	1.28041	0.356606	1.14597	0.196565	28400000	22200000	50600000	7.70415	50474	Atypical/PIKK/FRAP	FRAP	HEAPSpSPISGQPCGDDQNASPSK	1	S(5): 0.9; S(6): 99.1; S(9): 0.0; S(20): 0.0; S(22): 0.0	277	Reverse	Class I
O75376	1	Nuclear receptor corepressor 1 OS=Homo sapiens GN=NCOR1 PE=1 SV=2 - [NCOR1_HUMAN]	O75376	S2151	Nuclear receptor corepressor 1 (N-CoR) (N-CoR1)	NCOR1 KIAA1047	SEPYEPISPPQVPVV	1.39082	0.475936	1.24478	0.315896	53000000	38100000	91100000	7.95952	163338	CMGC/GSK	GSK3A	SHVSSEPYEPIpSPPQVPVVHEK	1	S(1): 0.0; S(4): 0.0; S(5): 0.0; Y(8): 0.0; S(12): 100.0	307	Reverse	Class I
O75376	1	Nuclear receptor corepressor 1 OS=Homo sapiens GN=NCOR1 PE=1 SV=2 - [NCOR1_HUMAN]	O75376	S2184	Nuclear receptor corepressor 1 (N-CoR) (N-CoR1)	NCOR1 KIAA1047	EQRNDARSPGSISYL	1.03734	0.0528949	0.928423	-0.107145	145000000	140000000	285000000	8.45484	56570	Atypical/PIKK/FRAP	FRAP	NDARpSPGSISYLPSFFTK	1	S(5): 100.0; S(8): 0.0; S(10): 0.0; Y(11): 0.0; S(14): 0.0; T(17): 0.0	374	Reverse	Class I
O75379	1	Vesicle-associated membrane protein 4 OS=Homo sapiens GN=VAMP4 PE=1 SV=2 - [VAMP4_HUMAN]	O75379	S30	Vesicle-associated membrane protein 4 (VAMP-4)	VAMP4	RNLLEDDSDEEEDFF	0.965251	-0.051024	0.8639	-0.211064	108000000	112000000	220000000	8.34242	126209	Other/CK2	CK2a1, CK2a2	NLLEDDpSDEEEDFFLRGPSGPR	1	S(7): 99.7; S(19): 0.3	52	Reverse	Class I
O75381	1	Peroxisomal membrane protein PEX14 OS=Homo sapiens GN=PEX14 PE=1 SV=1 - [PEX14_HUMAN]	O75381	S44	Peroxisomal membrane protein PEX14 (PTS1 receptor-docking protein) (Peroxin-14) (Peroxisomal membrane anchor protein PEX14)	PEX14	QNSRVRQSPLATRRA	1.001	0.00144342	0.895896	-0.158597	2790000	2790000	5580000	6.74663	85533			VRQpSPLATRR	1	S(4): 100.0; T(8): 0.0	161	Reverse	Class I
O75382	1	Tripartite motif-containing protein 3 OS=Homo sapiens GN=TRIM3 PE=1 SV=1 - [TRIM3_HUMAN]	O75382	S427	Tripartite motif-containing protein 3 (Brain-expressed RING finger protein) (RING finger protein 22) (RING finger protein 97)	TRIM3 BERP RNF22 RNF97	RPGDLPPSPDDVKRR	1.41844	0.504305	1.2695	0.344264	6360000	4480000	10840000	7.03503	138104			ALRPGDLPPpSPDDVK	1	S(10): 100.0	102	Reverse	Class I
O75382	1	Tripartite motif-containing protein 3 OS=Homo sapiens GN=TRIM3 PE=1 SV=1 - [TRIM3_HUMAN]	O75382	S437	Tripartite motif-containing protein 3 (Brain-expressed RING finger protein) (RING finger protein 22) (RING finger protein 97)	TRIM3 BERP RNF22 RNF97	DVKRRVKSPGGPGSH	1.03306	0.046921	0.924587	-0.113119	69600000	67400000	137000000	8.13672	83098	CAMK/CAMK2	CaMK2g	VKpSPGGPGSHVR	1	S(3): 100.0; S(9): 0.0	227	Reverse	Class I
O75382	1	Tripartite motif-containing protein 3 OS=Homo sapiens GN=TRIM3 PE=1 SV=1 - [TRIM3_HUMAN]	O75382	S455	Tripartite motif-containing protein 3 (Brain-expressed RING finger protein) (RING finger protein 22) (RING finger protein 97)	TRIM3 BERP RNF22 RNF97	KAVRRPSSMYSTGGK	1.38696	0.471929	1.24133	0.311888	2200000	1580000	3780000	6.57749	57003			RPSpSMYSTGGK	1	S(3): 0.8; S(4): 98.3; Y(6): 0.8; S(7): 0.0; T(8): 0.0	118	Reverse	Class I
O75382	1	Tripartite motif-containing protein 3 OS=Homo sapiens GN=TRIM3 PE=1 SV=1 - [TRIM3_HUMAN]	O75382	S7	Tripartite motif-containing protein 3 (Brain-expressed RING finger protein) (RING finger protein 22) (RING finger protein 97)	TRIM3 BERP RNF22 RNF97	*MAKREDSPGPEVQP	1.03627	0.0513992	0.927461	-0.108641	88900000	85800000	174700000	8.24229	53727	CAMK/CAMK2	CaMK2g	REDpSPGPEVQPMDK	1	S(4): 100.0	228	Reverse	Class I
O75385	1	Serine/threonine-protein kinase ULK1 OS=Homo sapiens GN=ULK1 PE=1 SV=1 - [ULK1_HUMAN]	O75385	S450	Serine/threonine-protein kinase ULK1 (EC 2.7.11.1) (Autophagy-related protein 1 homolog) (ATG1) (hATG1) (Unc-51-like kinase 1)	ULK1 KIAA0722	RIERNLQSPTQFQTP	0.837521	-0.255803	0.749581	-0.415843	35400000	42200000	77600000	7.88986	27707	Atypical/PIKK/FRAP	FRAP	NLQpSPTQFQTPR	1	S(4): 100.0; T(6): 0.0; T(10): 0.0	135	Reverse	Class I
O75385	1	Serine/threonine-protein kinase ULK1 OS=Homo sapiens GN=ULK1 PE=1 SV=1 - [ULK1_HUMAN]	O75385	S469	Serine/threonine-protein kinase ULK1 (EC 2.7.11.1) (Autophagy-related protein 1 homolog) (ATG1) (hATG1) (Unc-51-like kinase 1)	ULK1 KIAA0722	IRRSGSTSPLGFARA	1.03199	0.0454314	0.923633	-0.114609	51800000	50200000	102000000	8.0086	28087	Atypical/PIKK/FRAP	FRAP	SGSTpSPLGFAR	1	S(1): 0.0; S(3): 0.0; T(4): 0.1; S(5): 99.9	156	Reverse	Class I
O75385	1	Serine/threonine-protein kinase ULK1 OS=Homo sapiens GN=ULK1 PE=1 SV=1 - [ULK1_HUMAN]	O75385	S479	Serine/threonine-protein kinase ULK1 (EC 2.7.11.1) (Autophagy-related protein 1 homolog) (ATG1) (hATG1) (Unc-51-like kinase 1)	ULK1 KIAA0722	GFARASPSPPAHAEH	0.962464	-0.0551957	0.861405	-0.215236	9060000	9410000	18470000	7.26647	72862	Atypical/PIKK/FRAP	FRAP	ASPpSPPAHAEHGGVLAR	1	S(2): 0.0; S(4): 100.0	218	Reverse	Class I
O75385	1	Serine/threonine-protein kinase ULK1 OS=Homo sapiens GN=ULK1 PE=1 SV=1 - [ULK1_HUMAN]	O75385	S539	Serine/threonine-protein kinase ULK1 (EC 2.7.11.1) (Autophagy-related protein 1 homolog) (ATG1) (hATG1) (Unc-51-like kinase 1)	ULK1 KIAA0722	RSPRPGSSAPEHSPR	1.29199	0.369595	1.15633	0.209554	2540000	1960000	4500000	6.65321	167999			SPRPGSpSAPEHSPR	1	S(1): 0.0; S(6): 0.6; S(7): 99.4; S(12): 0.0	129	Reverse	Class I
O75385	1	Serine/threonine-protein kinase ULK1 OS=Homo sapiens GN=ULK1 PE=1 SV=1 - [ULK1_HUMAN]	O75385	S556	Serine/threonine-protein kinase ULK1 (EC 2.7.11.1) (Autophagy-related protein 1 homolog) (ATG1) (hATG1) (Unc-51-like kinase 1)	ULK1 KIAA0722	GLGCRLHSAPNLSDL	1.5083	0.592919	1.34992	0.432879	16200000	10800000	27000000	7.43136	89851	CAMK/CAMK2	CaMK2g	LHpSAPNLSDLHVVRPK	1	S(3): 100.0; S(8): 0.0	159	Reverse	Class I
O75385	1	Serine/threonine-protein kinase ULK1 OS=Homo sapiens GN=ULK1 PE=1 SV=1 - [ULK1_HUMAN]	O75385	S605	Serine/threonine-protein kinase ULK1 (EC 2.7.11.1) (Autophagy-related protein 1 homolog) (ATG1) (hATG1) (Unc-51-like kinase 1)	ULK1 KIAA0722	SCRNLRGSPKLPDFL	1.26422	0.33825	1.13148	0.17821	3520000	2790000	6310000	6.80003	74662			NLRGpSPKLPDFLQR	1	S(5): 100.0	247	Reverse	Class I
O75385	1	Serine/threonine-protein kinase ULK1 OS=Homo sapiens GN=ULK1 PE=1 SV=1 - [ULK1_HUMAN]	O75385	S623	Serine/threonine-protein kinase ULK1 (EC 2.7.11.1) (Autophagy-related protein 1 homolog) (ATG1) (hATG1) (Unc-51-like kinase 1)	ULK1 KIAA0722	PLPPILGSPTKAVPS	1.14025	0.189351	1.02052	0.0293108	86800000	76100000	162900000	8.21192	119841	Atypical/PIKK/FRAP	FRAP	NPLPPILGpSPTK	1	S(9): 94.5; T(11): 5.5	80	Reverse	Class I
O75385	1	Serine/threonine-protein kinase ULK1 OS=Homo sapiens GN=ULK1 PE=1 SV=1 - [ULK1_HUMAN]	O75385	S638	Serine/threonine-protein kinase ULK1 (EC 2.7.11.1) (Autophagy-related protein 1 homolog) (ATG1) (hATG1) (Unc-51-like kinase 1)	ULK1 KIAA0722	FDFPKTPSSQNLLAL	1.26422	0.33825	1.13148	0.17821	45200000	35700000	80900000	7.90795	30618			TPpSSQNLLALLAR	1	T(1): 0.1; S(3): 99.8; S(4): 0.1	131	Reverse	Class I
O75385	1	Serine/threonine-protein kinase ULK1 OS=Homo sapiens GN=ULK1 PE=1 SV=1 - [ULK1_HUMAN]	O75385	T636	Serine/threonine-protein kinase ULK1 (EC 2.7.11.1) (Autophagy-related protein 1 homolog) (ATG1) (hATG1) (Unc-51-like kinase 1)	ULK1 KIAA0722	PSFDFPKTPSSQNLL	1.443	0.529073	1.29149	0.369032	2800000	1940000	4740000	6.67578	15717	Atypical/PIKK/FRAP	FRAP	pTPSSQNLLALLAR	1	T(1): 99.3; S(3): 0.7; S(4): 0.0	138	Reverse	Class I
O75396	1	Vesicle-trafficking protein SEC22b OS=Homo sapiens GN=SEC22B PE=1 SV=3 - [SC22B_HUMAN]	O75396	S137	Vesicle-trafficking protein SEC22b (ER-Golgi SNARE of 24 kDa) (ERS-24) (ERS24) (SEC22 vesicle-trafficking protein homolog B) (SEC22 vesicle-trafficking protein-like 1)	SEC22B SEC22L1	RARRNLGSINTELQD	2.04082	1.02915	1.82653	0.869106	57700000	28300000	86000000	7.9345	119459			NLGpSINTELQDVQR	1	S(4): 100.0; T(7): 0.0	185	Reverse	Class I
O75400	1	Pre-mRNA-processing factor 40 homolog A OS=Homo sapiens GN=PRPF40A PE=1 SV=2 - [PR40A_HUMAN]	O75400	S888	Pre-mRNA-processing factor 40 homolog A (Fas ligand-associated factor 1) (Formin-binding protein 11) (Formin-binding protein 3) (Huntingtin yeast partner A) (Huntingtin-interacting protein 10) (HIP-10) (Huntingtin-interacting protein A) (Renal carcinoma antigen NY-REN-6)	PRPF40A FBP11 FLAF1 FNBP3 HIP10 HYPA HSPC225	HKSDSPESDAEREKD	0.838223	-0.254594	0.75021	-0.414634	3640000	4340000	7980000	6.902	93152	Other/PEK	HRI, PEK, PKR	HKSDSPEpSDAEREK	1	S(3): 0.0; S(5): 0.0; S(8): 100.0	322	Reverse	Class I
O75410	1	Transforming acidic coiled-coil-containing protein 1 OS=Homo sapiens GN=TACC1 PE=1 SV=2 - [TACC1_HUMAN]	O75410	S153	Transforming acidic coiled-coil-containing protein 1 (Gastric cancer antigen Ga55) (Taxin-1)	TACC1 KIAA1103	ISIVRPFSIETKDST	2.27273	1.18442	2.03409	1.02438	4650000	2050000	6700000	6.82607	136185			ISIVRPFpSIETK	1	S(2): 0.0; S(8): 100.0; T(11): 0.0	124	Reverse	Class I
O75410	1	Transforming acidic coiled-coil-containing protein 1 OS=Homo sapiens GN=TACC1 PE=1 SV=2 - [TACC1_HUMAN]	O75410	S276	Transforming acidic coiled-coil-containing protein 1 (Gastric cancer antigen Ga55) (Taxin-1)	TACC1 KIAA1103	EELDENTSPLLGDAR	1.12486	0.169745	1.00675	0.00970426	13300000	11800000	25100000	7.39967	132450	CMGC/CDK	PCTAIRE2	ASYHFSPEELDENTpSPLLGDAR	1	S(2): 0.0; Y(3): 0.0; S(6): 0.0; T(14): 0.4; S(15): 99.6	370	Reverse	Class I
O75410	1	Transforming acidic coiled-coil-containing protein 1 OS=Homo sapiens GN=TACC1 PE=1 SV=2 - [TACC1_HUMAN]	O75410	S94	Transforming acidic coiled-coil-containing protein 1 (Gastric cancer antigen Ga55) (Taxin-1)	TACC1 KIAA1103	PGAKSQESQEADEQL	1.52439	0.608232	1.36433	0.448192	2670000	1750000	4420000	6.64542	107050			SQEpSQEADEQLVAEVVEK	1	S(1): 5.1; S(4): 94.9	96	Reverse	Class I
O75420	1	PERQ amino acid-rich with GYF domain-containing protein 1 OS=Homo sapiens GN=GIGYF1 PE=1 SV=2 - [PERQ1_HUMAN]	O75420	S137	PERQ amino acid-rich with GYF domain-containing protein 1 (GRB10-interacting GYF protein 1)	GIGYF1 CDS2 PERQ1 PP3360	DSCFYQRSIEEGDGA	2.15517	1.1078	1.92888	0.947763	2000000	930000	2930000	6.46687	100456			pSIEEGDGAFGR	1	S(1): 100.0	111	Reverse	Class I
O75420	1	PERQ amino acid-rich with GYF domain-containing protein 1 OS=Homo sapiens GN=GIGYF1 PE=1 SV=2 - [PERQ1_HUMAN]	O75420	S230	PERQ amino acid-rich with GYF domain-containing protein 1 (GRB10-interacting GYF protein 1)	GIGYF1 CDS2 PERQ1 PP3360	GDRWRSASPDGGPRS	1.87266	0.905088	1.67603	0.745048	2520000	1340000	3860000	6.58659	31567			SApSPDGGPRpSAGWR	2	S(1): 0.0; S(3): 100.0; S(10): 100.0	177	Reverse	Class I
O75420	1	PERQ amino acid-rich with GYF domain-containing protein 1 OS=Homo sapiens GN=GIGYF1 PE=1 SV=2 - [PERQ1_HUMAN]	O75420	S237	PERQ amino acid-rich with GYF domain-containing protein 1 (GRB10-interacting GYF protein 1)	GIGYF1 CDS2 PERQ1 PP3360	SPDGGPRSAGWREHG	1.87266	0.905088	1.67603	0.745048	2520000	1340000	3860000	6.58659	31567			SApSPDGGPRpSAGWR	2	S(1): 0.0; S(3): 100.0; S(10): 100.0	177	Reverse	Class I
O75420	1	PERQ amino acid-rich with GYF domain-containing protein 1 OS=Homo sapiens GN=GIGYF1 PE=1 SV=2 - [PERQ1_HUMAN]	O75420	S24	PERQ amino acid-rich with GYF domain-containing protein 1 (GRB10-interacting GYF protein 1)	GIGYF1 CDS2 PERQ1 PP3360	SGGGSVASPPPSPAM	0.729927	-0.454176	0.653285	-0.614216	26800000	36800000	63600000	7.80346	26761			ALSGGGSVApSPPPSPAMPK	1	S(3): 8.1; S(7): 8.1; S(10): 75.8; S(14): 8.1	41	Reverse	Class I
O75420	1	PERQ amino acid-rich with GYF domain-containing protein 1 OS=Homo sapiens GN=GIGYF1 PE=1 SV=2 - [PERQ1_HUMAN]	O75420	S28	PERQ amino acid-rich with GYF domain-containing protein 1 (GRB10-interacting GYF protein 1)	GIGYF1 CDS2 PERQ1 PP3360	SVASPPPSPAMPKYK	0.267023	-1.90497	0.238985	-2.06501	893000	3340000	4233000	6.62665	97983			ALSGGGSVApSPPPpSPAMPK	2	S(3): 0.0; S(7): 0.0; S(10): 100.0; S(14): 100.0	200	Reverse	Class I
O75420	1	PERQ amino acid-rich with GYF domain-containing protein 1 OS=Homo sapiens GN=GIGYF1 PE=1 SV=2 - [PERQ1_HUMAN]	O75420	S406	PERQ amino acid-rich with GYF domain-containing protein 1 (GRB10-interacting GYF protein 1)	GIGYF1 CDS2 PERQ1 PP3360	DIRGIQLSPGVGSSA	1.02775	0.0394883	0.919836	-0.120552	3260000	3170000	6430000	6.80821	101575			GIQLpSPGVGSSAGPPGDLEDDEGLK	1	S(5): 100.0; S(10): 0.0; S(11): 0.0	298	Reverse	Class I
O75420	1	PERQ amino acid-rich with GYF domain-containing protein 1 OS=Homo sapiens GN=GIGYF1 PE=1 SV=2 - [PERQ1_HUMAN]	O75420	S538	PERQ amino acid-rich with GYF domain-containing protein 1 (GRB10-interacting GYF protein 1)	GIGYF1 CDS2 PERQ1 PP3360	VPFAPGPSPPPLLGN	0.528541	-0.919912	0.473044	-1.07995	5800000	11000000	16800000	7.22531	29852			VPFAPGPpSPPPLLGNMDQER	1	S(8): 100.0	115	Reverse	Class I
O75420	1	PERQ amino acid-rich with GYF domain-containing protein 1 OS=Homo sapiens GN=GIGYF1 PE=1 SV=2 - [PERQ1_HUMAN]	O75420	S636	PERQ amino acid-rich with GYF domain-containing protein 1 (GRB10-interacting GYF protein 1)	GIGYF1 CDS2 PERQ1 PP3360	LLPTMSRSLSVPDSG	1.26582	0.340075	1.13291	0.180035	20700000	16300000	37000000	7.5682	22894			pSLSVPDSGR	1	S(1): 99.3; S(3): 0.7; S(7): 0.0	68	Reverse	Class I
O75420	1	PERQ amino acid-rich with GYF domain-containing protein 1 OS=Homo sapiens GN=GIGYF1 PE=1 SV=2 - [PERQ1_HUMAN]	O75420	S638	PERQ amino acid-rich with GYF domain-containing protein 1 (GRB10-interacting GYF protein 1)	GIGYF1 CDS2 PERQ1 PP3360	PTMSRSLSVPDSGRL	1.32802	0.409278	1.18858	0.249238	32100000	24200000	56300000	7.75051	26721	AGC/AKT	AKT1	SLpSVPDSGR	1	S(1): 0.0; S(3): 100.0; S(7): 0.0	86	Reverse	Class I
O75436	1	Vacuolar protein sorting-associated protein 26A OS=Homo sapiens GN=VPS26A PE=1 SV=2 - [VP26A_HUMAN]	O75436	S47	Vacuolar protein sorting-associated protein 26A (Vesicle protein sorting 26A) (hVPS26)	VPS26A VPS26	YLFYDGESVSGKVNL	0.422833	-1.24184	0.378436	-1.40188	424000	1000000	1424000	6.15351	146190			HYLFYDGEpSVSGK	1	Y(2): 1.0; Y(5): 1.0; S(9): 98.0; S(11): 0.0	68	Reverse	Class I
O75445	1	Usherin OS=Homo sapiens GN=USH2A PE=1 SV=3 - [USH2A_HUMAN]	O75445	S3503	Usherin (Usher syndrome type IIa protein) (Usher syndrome type-2A protein)	USH2A	EDVPQGVSPPTWTKI	1.22549	0.293359	1.09681	0.133319	21700000	17700000	39400000	7.5955	57402			EDVPQGVpSPPTWTK	1	S(8): 99.8; T(11): 0.2; T(13): 0.0	90	Reverse	Class I
O75445	1	Usherin OS=Homo sapiens GN=USH2A PE=1 SV=3 - [USH2A_HUMAN]	O75445	T875	Usherin (Usher syndrome type IIa protein) (Usher syndrome type-2A protein)	USH2A	CPCKLGVTGLRCNQC	1.65837	0.72977	1.48425	0.56973	5690000	3430000	9120000	6.95999	62525			LGVpTGLR	1	T(4): 100.0	58	Reverse	Class I
O75448	1	Mediator of RNA polymerase II transcription subunit 24 OS=Homo sapiens GN=MED24 PE=1 SV=1 - [MED24_HUMAN]	O75448	S374	Mediator of RNA polymerase II transcription subunit 24 (Activator-recruited cofactor 100 kDa component) (ARC100) (Cofactor required for Sp1 transcriptional activation subunit 4) (CRSP complex subunit 4) (Mediator complex subunit 24) (Thyroid hormone receptor-associated protein 4) (Thyroid hormone receptor-associated protein complex 100 kDa component) (Trap100) (hTRAP100) (Vitamin D3 receptor-inte…	MED24 ARC100 CRSP4 DRIP100 KIAA0130 THRAP4 TRAP100	CGKQGLLSEASVNNL	1.45349	0.53952	1.30087	0.379479	7860000	5410000	13270000	7.12287	29098			QGLLpSEApSVNNLMAK	2	S(5): 100.0; S(8): 100.0	38	Reverse	Class I
O75448	1	Mediator of RNA polymerase II transcription subunit 24 OS=Homo sapiens GN=MED24 PE=1 SV=1 - [MED24_HUMAN]	O75448	S377	Mediator of RNA polymerase II transcription subunit 24 (Activator-recruited cofactor 100 kDa component) (ARC100) (Cofactor required for Sp1 transcriptional activation subunit 4) (CRSP complex subunit 4) (Mediator complex subunit 24) (Thyroid hormone receptor-associated protein 4) (Thyroid hormone receptor-associated protein complex 100 kDa component) (Trap100) (hTRAP100) (Vitamin D3 receptor-inte…	MED24 ARC100 CRSP4 DRIP100 KIAA0130 THRAP4 TRAP100	QGLLSEASVNNLMAK	1.45349	0.53952	1.30087	0.379479	7860000	5410000	13270000	7.12287	29098			QGLLpSEApSVNNLMAK	2	S(5): 100.0; S(8): 100.0	38	Reverse	Class I
O75448	1	Mediator of RNA polymerase II transcription subunit 24 OS=Homo sapiens GN=MED24 PE=1 SV=1 - [MED24_HUMAN]	O75448	S862	Mediator of RNA polymerase II transcription subunit 24 (Activator-recruited cofactor 100 kDa component) (ARC100) (Cofactor required for Sp1 transcriptional activation subunit 4) (CRSP complex subunit 4) (Mediator complex subunit 24) (Thyroid hormone receptor-associated protein 4) (Thyroid hormone receptor-associated protein complex 100 kDa component) (Trap100) (hTRAP100) (Vitamin D3 receptor-inte…	MED24 ARC100 CRSP4 DRIP100 KIAA0130 THRAP4 TRAP100	SKLMRLLSSNEDDAN	1.13636	0.184425	1.01705	0.0243842	10400000	9120000	19520000	7.29048	19870			LLpSSNEDDANILSSPTDR	1	S(3): 93.7; S(4): 6.3; S(13): 0.0; S(14): 0.0; T(16): 0.0	126	Reverse	Class I
O75448	1	Mediator of RNA polymerase II transcription subunit 24 OS=Homo sapiens GN=MED24 PE=1 SV=1 - [MED24_HUMAN]	O75448	S873	Mediator of RNA polymerase II transcription subunit 24 (Activator-recruited cofactor 100 kDa component) (ARC100) (Cofactor required for Sp1 transcriptional activation subunit 4) (CRSP complex subunit 4) (Mediator complex subunit 24) (Thyroid hormone receptor-associated protein 4) (Thyroid hormone receptor-associated protein complex 100 kDa component) (Trap100) (hTRAP100) (Vitamin D3 receptor-inte…	MED24 ARC100 CRSP4 DRIP100 KIAA0130 THRAP4 TRAP100	DDANILSSPTDRSMS	1.08578	0.118727	0.97177	-0.0413135	60600000	55800000	116400000	8.06595	117987	CMGC/CDK	CDK11, CDK8	LLSSNEDDANILSpSPTDR	1	S(3): 0.0; S(4): 0.0; S(13): 0.1; S(14): 99.9; T(16): 0.0	195	Reverse	Class I
O75475	1	PC4 and SFRS1-interacting protein OS=Homo sapiens GN=PSIP1 PE=1 SV=1 - [PSIP1_HUMAN]	O75475	S105	PC4 and SFRS1-interacting protein (CLL-associated antigen KW-7) (Dense fine speckles 70 kDa protein) (DFS 70) (Lens epithelium-derived growth factor) (Transcriptional coactivator p75/p52)	PSIP1 DFS70 LEDGF PSIP2	ATKQSNASSDVEVEE	0.841043	-0.249749	0.752733	-0.409789	2660000	3160000	5820000	6.76492	12689	STE/STE20	NRK	QSNApSSDVEVEEK	1	S(2): 0.0; S(5): 99.0; S(6): 1.0	147	Reverse	Class I
O75475	1	PC4 and SFRS1-interacting protein OS=Homo sapiens GN=PSIP1 PE=1 SV=1 - [PSIP1_HUMAN]	O75475	S106	PC4 and SFRS1-interacting protein (CLL-associated antigen KW-7) (Dense fine speckles 70 kDa protein) (DFS 70) (Lens epithelium-derived growth factor) (Transcriptional coactivator p75/p52)	PSIP1 DFS70 LEDGF PSIP2	TKQSNASSDVEVEEK	1.0929	0.128156	0.978142	-0.0318841	376000000	344000000	720000000	8.85733	113064	STE/STE20	NRK	QSNASpSDVEVEEK	1	S(2): 0.0; S(5): 5.6; S(6): 94.4	86	Reverse	Class I
O75475	1	PC4 and SFRS1-interacting protein OS=Homo sapiens GN=PSIP1 PE=1 SV=1 - [PSIP1_HUMAN]	O75475	S129	PC4 and SFRS1-interacting protein (CLL-associated antigen KW-7) (Dense fine speckles 70 kDa protein) (DFS 70) (Lens epithelium-derived growth factor) (Transcriptional coactivator p75/p52)	PSIP1 DFS70 LEDGF PSIP2	TDHEEKASNEDVTKA	1.13766	0.186065	1.0182	0.0260245	11600000	10200000	21800000	7.33846	83056			ETSVSKEDTDHEEKApSNEDVTK	1	T(2): 0.0; S(3): 0.0; S(5): 0.0; T(9): 0.0; S(16): 100.0; T(21): 0.0	194	Reverse	Class I
O75475	1	PC4 and SFRS1-interacting protein OS=Homo sapiens GN=PSIP1 PE=1 SV=1 - [PSIP1_HUMAN]	O75475	S514	PC4 and SFRS1-interacting protein (CLL-associated antigen KW-7) (Dense fine speckles 70 kDa protein) (DFS 70) (Lens epithelium-derived growth factor) (Transcriptional coactivator p75/p52)	PSIP1 DFS70 LEDGF PSIP2	STKKKPSSEERETEI	1.68919	0.756331	1.51182	0.596291	9330000	5520000	14850000	7.17173	88148	AGC/PKC	PKCg	KKPSpSEERETEISLK	1	S(4): 0.0; S(5): 100.0; T(10): 0.0; S(13): 0.0	378	Reverse	Class I
O75475	1	PC4 and SFRS1-interacting protein OS=Homo sapiens GN=PSIP1 PE=1 SV=1 - [PSIP1_HUMAN]	O75475	T122	PC4 and SFRS1-interacting protein (CLL-associated antigen KW-7) (Dense fine speckles 70 kDa protein) (DFS 70) (Lens epithelium-derived growth factor) (Transcriptional coactivator p75/p52)	PSIP1 DFS70 LEDGF PSIP2	TSVSKEDTDHEEKAS	1.12994	0.176251	1.0113	0.0162102	16700000	14800000	31500000	7.49831	72954			QSNASSDVEVEEKETSVSKEDpTDHEEK	1	S(2): 0.0; S(5): 0.0; S(6): 0.0; T(15): 0.5; S(16): 1.6; S(18): 1.6; T(22): 96.3	56	Reverse	Class I
O75494	1	FUS-interacting serine-arginine-rich protein 1 OS=Homo sapiens GN=FUSIP1 PE=1 SV=1 - [FUSIP_HUMAN]	O75494	S106	Serine/arginine-rich splicing factor 10 (40 kDa SR-repressor protein) (SRrp40) (FUS-interacting serine-arginine-rich protein 1) (Splicing factor SRp38) (Splicing factor, arginine/serine-rich 13A) (TLS-associated protein with Ser-Arg repeats) (TASR) (TLS-associated protein with SR repeats) (TLS-associated serine-arginine protein) (TLS-associated SR protein)	SRSF10 FUSIP1 FUSIP2 SFRS13A TASR	KEGRNVYSSSRYDDY	1.27714	0.352916	1.14304	0.192875	15700000	12300000	28000000	7.44716	60539			NVYpSSSRYDDYDR	1	Y(3): 0.0; S(4): 100.0; S(5): 0.0; S(6): 0.0; Y(8): 0.0; Y(11): 0.0	275	Reverse	Class I
O75494	1	FUS-interacting serine-arginine-rich protein 1 OS=Homo sapiens GN=FUSIP1 PE=1 SV=1 - [FUSIP_HUMAN]	O75494	S129	Serine/arginine-rich splicing factor 10 (40 kDa SR-repressor protein) (SRrp40) (FUS-interacting serine-arginine-rich protein 1) (Splicing factor SRp38) (Splicing factor, arginine/serine-rich 13A) (TLS-associated protein with Ser-Arg repeats) (TASR) (TLS-associated protein with SR repeats) (TLS-associated serine-arginine protein) (TLS-associated SR protein)	SRSF10 FUSIP1 FUSIP2 SFRS13A TASR	RSYERRRSRSRSFDY	2.03252	1.02327	1.81911	0.863229	282000	139000	421000	5.62428	38626	AGC/PKC	PKCb	pSRpSRpSFDYNYR	3	S(1): 100.0; S(3): 100.0; S(5): 100.0; Y(8): 0.0; Y(10): 0.0	189	Reverse	Class I
O75494	1	FUS-interacting serine-arginine-rich protein 1 OS=Homo sapiens GN=FUSIP1 PE=1 SV=1 - [FUSIP_HUMAN]	O75494	S131	Serine/arginine-rich splicing factor 10 (40 kDa SR-repressor protein) (SRrp40) (FUS-interacting serine-arginine-rich protein 1) (Splicing factor SRp38) (Splicing factor, arginine/serine-rich 13A) (TLS-associated protein with Ser-Arg repeats) (TASR) (TLS-associated protein with SR repeats) (TLS-associated serine-arginine protein) (TLS-associated SR protein)	SRSF10 FUSIP1 FUSIP2 SFRS13A TASR	YERRRSRSRSFDYNY	1.3624	0.446148	1.21935	0.286108	2670000	1960000	4630000	6.66558	65913	AGC/PKC	PKCb	pSRSFDYNYR	1	S(1): 99.6; S(3): 0.4; Y(6): 0.0; Y(8): 0.0	140	Reverse	Class I
O75494	1	FUS-interacting serine-arginine-rich protein 1 OS=Homo sapiens GN=FUSIP1 PE=1 SV=1 - [FUSIP_HUMAN]	O75494	S133	Serine/arginine-rich splicing factor 10 (40 kDa SR-repressor protein) (SRrp40) (FUS-interacting serine-arginine-rich protein 1) (Splicing factor SRp38) (Splicing factor, arginine/serine-rich 13A) (TLS-associated protein with Ser-Arg repeats) (TASR) (TLS-associated protein with SR repeats) (TLS-associated serine-arginine protein) (TLS-associated SR protein)	SRSF10 FUSIP1 FUSIP2 SFRS13A TASR	RRRSRSRSFDYNYRR	1.71821	0.780909	1.5378	0.620869	9770000	5690000	15460000	7.18921	89321	AGC/PKC	PKCb	SRpSFDYNYRR	1	S(1): 0.0; S(3): 100.0; Y(6): 0.0; Y(8): 0.0	216	Reverse	Class I
O75494	1	FUS-interacting serine-arginine-rich protein 1 OS=Homo sapiens GN=FUSIP1 PE=1 SV=1 - [FUSIP_HUMAN]	O75494	S141	Serine/arginine-rich splicing factor 10 (40 kDa SR-repressor protein) (SRrp40) (FUS-interacting serine-arginine-rich protein 1) (Splicing factor SRp38) (Splicing factor, arginine/serine-rich 13A) (TLS-associated protein with Ser-Arg repeats) (TASR) (TLS-associated protein with SR repeats) (TLS-associated serine-arginine protein) (TLS-associated SR protein)	SRSF10 FUSIP1 FUSIP2 SFRS13A TASR	FDYNYRRSYSPRNSR	0.997009	-0.00432161	0.892323	-0.164362	1780000	1790000	3570000	6.55267	140002	AGC/PKC	PKCb	SFDYNYRRpSYpSPR	2	S(1): 0.0; Y(4): 0.0; Y(6): 0.0; S(9): 99.0; Y(10): 1.1; S(11): 99.9	131	Reverse	Class I
O75494	1	FUS-interacting serine-arginine-rich protein 1 OS=Homo sapiens GN=FUSIP1 PE=1 SV=1 - [FUSIP_HUMAN]	O75494	S143	Serine/arginine-rich splicing factor 10 (40 kDa SR-repressor protein) (SRrp40) (FUS-interacting serine-arginine-rich protein 1) (Splicing factor SRp38) (Splicing factor, arginine/serine-rich 13A) (TLS-associated protein with Ser-Arg repeats) (TASR) (TLS-associated protein with SR repeats) (TLS-associated serine-arginine protein) (TLS-associated SR protein)	SRSF10 FUSIP1 FUSIP2 SFRS13A TASR	YNYRRSYSPRNSRPT	0.997009	-0.00432161	0.892323	-0.164362	1780000	1790000	3570000	6.55267	140002	AGC/PKC	PKCb	SFDYNYRRpSYpSPR	2	S(1): 0.0; Y(4): 0.0; Y(6): 0.0; S(9): 99.0; Y(10): 1.1; S(11): 99.9	131	Reverse	Class I
O75494	1	FUS-interacting serine-arginine-rich protein 1 OS=Homo sapiens GN=FUSIP1 PE=1 SV=1 - [FUSIP_HUMAN]	O75494	S23	Serine/arginine-rich splicing factor 10 (40 kDa SR-repressor protein) (SRrp40) (FUS-interacting serine-arginine-rich protein 1) (Splicing factor SRp38) (Splicing factor, arginine/serine-rich 13A) (TLS-associated protein with Ser-Arg repeats) (TASR) (TLS-associated protein with SR repeats) (TLS-associated serine-arginine protein) (TLS-associated SR protein)	SRSF10 FUSIP1 FUSIP2 SFRS13A TASR	NVADDTRSEDLRREF	1.34771	0.430509	1.2062	0.270468	11400000	8470000	19870000	7.2982	78019			NVADDTRpSEDLRR	1	T(6): 0.0; S(8): 100.0	277	Reverse	Class I
O75494	1	FUS-interacting serine-arginine-rich protein 1 OS=Homo sapiens GN=FUSIP1 PE=1 SV=1 - [FUSIP_HUMAN]	O75494	S251	Serine/arginine-rich splicing factor 10 (40 kDa SR-repressor protein) (SRrp40) (FUS-interacting serine-arginine-rich protein 1) (Splicing factor SRp38) (Splicing factor, arginine/serine-rich 13A) (TLS-associated protein with Ser-Arg repeats) (TASR) (TLS-associated protein with SR repeats) (TLS-associated serine-arginine protein) (TLS-associated SR protein)	SRSF10 FUSIP1 FUSIP2 SFRS13A TASR	RSRSKSRSRSWTSPK	1.25786	0.330973	1.12579	0.170933	2880000	2290000	5170000	6.71349	62514	AGC/PKC	PKCb	pSRSWTSPK	1	S(1): 98.1; S(3): 0.6; T(5): 0.6; S(6): 0.6	70	Reverse	Class I
O75508	1	Claudin-11 OS=Homo sapiens GN=CLDN11 PE=1 SV=2 - [CLD11_HUMAN]	O75508	S196	Claudin-11 (Oligodendrocyte-specific protein)	CLDN11 OSP OTM	RFYYTAGSSSPTHAK	1.27714	0.352916	1.14304	0.192875	102000000	79700000	181700000	8.25935	134692			FYYTAGpSSSPTHAK	1	Y(2): 0.0; Y(3): 0.0; T(4): 0.0; S(7): 97.9; S(8): 1.0; S(9): 1.0; T(11): 0.0	134	Reverse	Class I
O75508	1	Claudin-11 OS=Homo sapiens GN=CLDN11 PE=1 SV=2 - [CLD11_HUMAN]	O75508	S198	Claudin-11 (Oligodendrocyte-specific protein)	CLDN11 OSP OTM	YYTAGSSSPTHAKSA	1.12867	0.174621	1.01016	0.014581	147000000	130000000	277000000	8.44248	51285	STE/STE11	MAP3K2	FYYTAGSSpSPTHAK	1	Y(2): 0.0; Y(3): 0.0; T(4): 0.0; S(7): 0.0; S(8): 0.0; S(9): 100.0; T(11): 0.0	343	Reverse	Class I
O75533	1	Splicing factor 3B subunit 1 OS=Homo sapiens GN=SF3B1 PE=1 SV=2 - [SF3B1_HUMAN]	O75533	S129	Splicing factor 3B subunit 1 (Pre-mRNA-splicing factor SF3b 155 kDa subunit) (SF3b155) (Spliceosome-associated protein 155) (SAP 155)	SF3B1 SAP155	HRRTMIISPERLDPF	1.49925	0.584241	1.34183	0.424201	70300000	46900000	117200000	8.06893	49800	CMGC/DYRK	DYRK1A, DYRK1B	TMIIpSPERLDPFADGGK	1	T(1): 0.0; S(5): 100.0	291	Reverse	Class I
O75533	1	Splicing factor 3B subunit 1 OS=Homo sapiens GN=SF3B1 PE=1 SV=2 - [SF3B1_HUMAN]	O75533	S190	Splicing factor 3B subunit 1 (Pre-mRNA-splicing factor SF3b 155 kDa subunit) (SF3b155) (Spliceosome-associated protein 155) (SAP 155)	SF3B1 SAP155	VVNGAAASQPPSKRK	0.94518	-0.0813396	0.845936	-0.24138	1770000	1880000	3650000	6.56229	96386			VVNGAAApSQPPpSK	2	S(8): 100.0; S(12): 100.0	110	Reverse	Class I
O75533	1	Splicing factor 3B subunit 1 OS=Homo sapiens GN=SF3B1 PE=1 SV=2 - [SF3B1_HUMAN]	O75533	S194	Splicing factor 3B subunit 1 (Pre-mRNA-splicing factor SF3b 155 kDa subunit) (SF3b155) (Spliceosome-associated protein 155) (SAP 155)	SF3B1 SAP155	AAASQPPSKRKRRWD	1.21212	0.277534	1.08485	0.117494	400000000	330000000	730000000	8.86332	112326	CMGC/DYRK	DYRK1A, DYRK1B	VVNGAAASQPPpSK	1	S(8): 0.0; S(12): 100.0	133	Reverse	Class I
O75533	1	Splicing factor 3B subunit 1 OS=Homo sapiens GN=SF3B1 PE=1 SV=2 - [SF3B1_HUMAN]	O75533	S332	Splicing factor 3B subunit 1 (Pre-mRNA-splicing factor SF3b 155 kDa subunit) (SF3b155) (Spliceosome-associated protein 155) (SAP 155)	SF3B1 SAP155	ETPTPGASKRKSRWD	1.22549	0.293359	1.09681	0.133319	2630000	2140000	4770000	6.67852	96622	CMGC/GSK	GSK3B	GGDSIGEpTPTPGApSK	2	S(4): 0.0; T(8): 99.6; T(10): 0.4; S(14): 100.0	184	Reverse	Class I
O75533	1	Splicing factor 3B subunit 1 OS=Homo sapiens GN=SF3B1 PE=1 SV=2 - [SF3B1_HUMAN]	O75533	S400	Splicing factor 3B subunit 1 (Pre-mRNA-splicing factor SF3b 155 kDa subunit) (SF3b155) (Spliceosome-associated protein 155) (SAP 155)	SF3B1 SAP155	DERNRPLSDEELDAM	2.30415	1.20423	2.06221	1.04419	1080000	469000	1549000	6.19005	132113			NRPLpSDEELDAMFPEGYK	1	S(5): 100.0; Y(17): 0.0	159	Reverse	Class I
O75533	1	Splicing factor 3B subunit 1 OS=Homo sapiens GN=SF3B1 PE=1 SV=2 - [SF3B1_HUMAN]	O75533	S488	Splicing factor 3B subunit 1 (Pre-mRNA-splicing factor SF3b 155 kDa subunit) (SF3b155) (Spliceosome-associated protein 155) (SAP 155)	SF3B1 SAP155	DVDESTLSPEEQKER	1.90114	0.926865	1.70152	0.766825	2880000	1510000	4390000	6.64246	118988	CMGC/CDK/CDC2	CDK2	LLVDVDESTLpSPEEQK	1	S(8): 0.0; T(9): 0.1; S(11): 99.9	139	Reverse	Class I
O75533	1	Splicing factor 3B subunit 1 OS=Homo sapiens GN=SF3B1 PE=1 SV=2 - [SF3B1_HUMAN]	O75533	T142	Splicing factor 3B subunit 1 (Pre-mRNA-splicing factor SF3b 155 kDa subunit) (SF3b155) (Spliceosome-associated protein 155) (SAP 155)	SF3B1 SAP155	PFADGGKTPDPKMNV	1.06724	0.093879	0.955176	-0.0661614	33800000	31700000	65500000	7.81624	125469			LDPFADGGKpTPDPK	1	T(10): 100.0	297	Reverse	Class I
O75533	1	Splicing factor 3B subunit 1 OS=Homo sapiens GN=SF3B1 PE=1 SV=2 - [SF3B1_HUMAN]	O75533	T203	Splicing factor 3B subunit 1 (Pre-mRNA-splicing factor SF3b 155 kDa subunit) (SF3b155) (Spliceosome-associated protein 155) (SAP 155)	SF3B1 SAP155	RKRRWDQTADQTPGA	1.17371	0.231075	1.05047	0.0710343	56700000	48300000	105000000	8.02119	109034			WDQpTADQTPGATPK	1	T(4): 97.6; T(8): 1.2; T(12): 1.2	16	Reverse	Class I
O75533	1	Splicing factor 3B subunit 1 OS=Homo sapiens GN=SF3B1 PE=1 SV=2 - [SF3B1_HUMAN]	O75533	T207	Splicing factor 3B subunit 1 (Pre-mRNA-splicing factor SF3b 155 kDa subunit) (SF3b155) (Spliceosome-associated protein 155) (SAP 155)	SF3B1 SAP155	WDQTADQTPGATPKK	1.14548	0.195946	1.0252	0.035906	7730000	6750000	14480000	7.16077	89242	CMGC/CDK/CDC2	CDK2	RRWDQTADQpTPGATPK	1	T(6): 0.0; T(10): 100.0; T(14): 0.0	270	Reverse	Class I
O75533	1	Splicing factor 3B subunit 1 OS=Homo sapiens GN=SF3B1 PE=1 SV=2 - [SF3B1_HUMAN]	O75533	T211	Splicing factor 3B subunit 1 (Pre-mRNA-splicing factor SF3b 155 kDa subunit) (SF3b155) (Spliceosome-associated protein 155) (SAP 155)	SF3B1 SAP155	ADQTPGATPKKLSSW	1.33156	0.413115	1.19174	0.253075	132000000	99300000	231300000	8.36418	26510	CMGC/CDK/CDC2	CDK2	WDQTADQTPGApTPK	1	T(4): 0.0; T(8): 0.0; T(12): 100.0	57	Reverse	Class I
O75533	1	Splicing factor 3B subunit 1 OS=Homo sapiens GN=SF3B1 PE=1 SV=2 - [SF3B1_HUMAN]	O75533	T223	Splicing factor 3B subunit 1 (Pre-mRNA-splicing factor SF3b 155 kDa subunit) (SF3b155) (Spliceosome-associated protein 155) (SAP 155)	SF3B1 SAP155	SSWDQAETPGHTPSL	1.23153	0.300448	1.10222	0.140408	107000000	86700000	193700000	8.28713	73817	CMGC/CDK/CDC2	CDK2	KLSSWDQAEpTPGHTPSLR	1	S(3): 0.0; S(4): 0.0; T(10): 100.0; T(14): 0.0; S(16): 0.0	280	Reverse	Class I
O75533	1	Splicing factor 3B subunit 1 OS=Homo sapiens GN=SF3B1 PE=1 SV=2 - [SF3B1_HUMAN]	O75533	T227	Splicing factor 3B subunit 1 (Pre-mRNA-splicing factor SF3b 155 kDa subunit) (SF3b155) (Spliceosome-associated protein 155) (SAP 155)	SF3B1 SAP155	QAETPGHTPSLRWDE	1.41044	0.496142	1.26234	0.336102	29600000	21000000	50600000	7.70415	73786	CMGC/CDK/CDC2	CDK2	KLSSWDQAETPGHpTPSLR	1	S(3): 0.0; S(4): 0.0; T(10): 0.0; T(14): 100.0; S(16): 0.0	305	Reverse	Class I
O75533	1	Splicing factor 3B subunit 1 OS=Homo sapiens GN=SF3B1 PE=1 SV=2 - [SF3B1_HUMAN]	O75533	T235	Splicing factor 3B subunit 1 (Pre-mRNA-splicing factor SF3b 155 kDa subunit) (SF3b155) (Spliceosome-associated protein 155) (SAP 155)	SF3B1 SAP155	PSLRWDETPGRAKGS	1.22399	0.291592	1.09547	0.131552	121000000	98900000	219900000	8.34223	108766	CMGC/CDK/CDC2	CDK2	WDEpTPGR	1	T(4): 100.0	103	Reverse	Class I
O75533	1	Splicing factor 3B subunit 1 OS=Homo sapiens GN=SF3B1 PE=1 SV=2 - [SF3B1_HUMAN]	O75533	T244	Splicing factor 3B subunit 1 (Pre-mRNA-splicing factor SF3b 155 kDa subunit) (SF3b155) (Spliceosome-associated protein 155) (SAP 155)	SF3B1 SAP155	GRAKGSETPGATPGS	0.914077	-0.129613	0.818099	-0.289653	5140000	5620000	10760000	7.03181	158487	CMGC/CDK/CDC2	CDK2	AKGSEpTPGATPGSK	1	S(4): 0.0; T(6): 100.0; T(10): 0.0; S(13): 0.0	178	Reverse	Class I
O75533	1	Splicing factor 3B subunit 1 OS=Homo sapiens GN=SF3B1 PE=1 SV=2 - [SF3B1_HUMAN]	O75533	T296	Splicing factor 3B subunit 1 (Pre-mRNA-splicing factor SF3b 155 kDa subunit) (SF3b155) (Spliceosome-associated protein 155) (SAP 155)	SF3B1 SAP155	RKNRWDETPKTERDT	1.37552	0.459973	1.23109	0.299932	12100000	8820000	20920000	7.32056	85892	CMGC/CDK/CDC2	CDK2	NRWDEpTPKTER	1	T(6): 100.0; T(9): 0.0	263	Reverse	Class I
O75533	1	Splicing factor 3B subunit 1 OS=Homo sapiens GN=SF3B1 PE=1 SV=2 - [SF3B1_HUMAN]	O75533	T313	Splicing factor 3B subunit 1 (Pre-mRNA-splicing factor SF3b 155 kDa subunit) (SF3b155) (Spliceosome-associated protein 155) (SAP 155)	SF3B1 SAP155	HGSGWAETPRTDRGG	1.10497	0.14401	0.98895	-0.0160301	83100000	75200000	158300000	8.19948	72923	CMGC/CDK/CDC2	CDK2	DTPGHGSGWAEpTPRTDR	1	T(2): 0.0; S(7): 0.0; T(12): 100.0; T(15): 0.0	172	Reverse	Class I
O75533	1	Splicing factor 3B subunit 1 OS=Homo sapiens GN=SF3B1 PE=1 SV=2 - [SF3B1_HUMAN]	O75533	T326	Splicing factor 3B subunit 1 (Pre-mRNA-splicing factor SF3b 155 kDa subunit) (SF3b155) (Spliceosome-associated protein 155) (SAP 155)	SF3B1 SAP155	GGDSIGETPTPGASK	1.1236	0.168123	1.00562	0.00808235	253000000	225000000	478000000	8.67943	108478	CMGC/CDK/CDC2	CDK2	GGDSIGEpTPTPGASK	1	S(4): 0.0; T(8): 100.0; T(10): 0.0; S(14): 0.0	171	Reverse	Class I
O75533	1	Splicing factor 3B subunit 1 OS=Homo sapiens GN=SF3B1 PE=1 SV=2 - [SF3B1_HUMAN]	O75533	T350	Splicing factor 3B subunit 1 (Pre-mRNA-splicing factor SF3b 155 kDa subunit) (SF3b155) (Spliceosome-associated protein 155) (SAP 155)	SF3B1 SAP155	ASQMGGSTPVLTPGK	1.23762	0.307573	1.10767	0.147532	64700000	52300000	117000000	8.06819	60737	CMGC/DYRK	DYRK1A, DYRK1B	SRWDETPASQMGGSpTPVLTPGK	1	S(1): 0.0; T(6): 0.0; S(9): 0.0; S(14): 0.5; T(15): 99.5; T(19): 0.0	357	Reverse	Class I
O75533	1	Splicing factor 3B subunit 1 OS=Homo sapiens GN=SF3B1 PE=1 SV=2 - [SF3B1_HUMAN]	O75533	T426	Splicing factor 3B subunit 1 (Pre-mRNA-splicing factor SF3b 155 kDa subunit) (SF3b155) (Spliceosome-associated protein 155) (SAP 155)	SF3B1 SAP155	AGYVPIRTPARKLTA	0.995025	-0.0071955	0.890547	-0.167236	152000000	153000000	305000000	8.4843	55946			VLPPPAGYVPIRpTPAR	1	Y(8): 0.0; T(13): 100.0	187	Reverse	Class I
O75533	1	Splicing factor 3B subunit 1 OS=Homo sapiens GN=SF3B1 PE=1 SV=2 - [SF3B1_HUMAN]	O75533	T434	Splicing factor 3B subunit 1 (Pre-mRNA-splicing factor SF3b 155 kDa subunit) (SF3b155) (Spliceosome-associated protein 155) (SAP 155)	SF3B1 SAP155	PARKLTATPTPLGGM	1.18064	0.239566	1.05667	0.0795257	82200000	69700000	151900000	8.18156	162678	CMGC/CDK/CDC2	CDK2	KLTApTPTPLGGMTGFHMQTEDR	1	T(3): 0.0; T(5): 99.3; T(7): 0.7; T(13): 0.0; T(19): 0.0	210	Reverse	Class I
O75533	1	Splicing factor 3B subunit 1 OS=Homo sapiens GN=SF3B1 PE=1 SV=2 - [SF3B1_HUMAN]	O75533	T436	Splicing factor 3B subunit 1 (Pre-mRNA-splicing factor SF3b 155 kDa subunit) (SF3b155) (Spliceosome-associated protein 155) (SAP 155)	SF3B1 SAP155	RKLTATPTPLGGMTG	1.01112	0.0159576	0.904954	-0.144083	30900000	30600000	61500000	7.78888	60676	CMGC/GSK	GSK3B	KLTApTPpTPLGGMTGFHMQTEDR	2	T(3): 0.0; T(5): 100.0; T(7): 100.0; T(13): 0.0; T(19): 0.0	181	Reverse	Class I
O75569	1	Interferon-inducible double stranded RNA-dependent protein kinase activator A OS=Homo sapiens GN=PRKRA PE=1 SV=1 - [PRKRA_HUMAN]	O75569	S18	Interferon-inducible double stranded RNA-dependent protein kinase activator A (PKR-associated protein X) (PKR-associating protein X) (Protein activator of the interferon-induced protein kinase) (Protein kinase, interferon-inducible double stranded RNA-dependent activator)	PRKRA PACT RAX HSD-14 HSD14	PPLEREDSGTFSLGK	1.21507	0.281036	1.08748	0.120995	27100000	22300000	49400000	7.69373	125606	Other/NEK	NEK1	AEAPPLEREDpSGTFSLGK	1	S(11): 100.0; T(13): 0.0; S(15): 0.0	242	Reverse	Class I
O75592	1	Probable E3 ubiquitin-protein ligase MYCBP2 OS=Homo sapiens GN=MYCBP2 PE=1 SV=3 - [MYCB2_HUMAN]	O75592	S2751	Probable E3 ubiquitin-protein ligase MYCBP2 (EC 6.3.2.-) (Myc-binding protein 2) (Pam/highwire/rpm-1 protein) (Protein associated with Myc)	MYCBP2 KIAA0916 PAM	DSHSRSLSPNHNTLQ	1.05932	0.0831412	0.948093	-0.0768992	143000000	135000000	278000000	8.44404	51520	Atypical/PIKK/FRAP	FRAP	SLpSPNHNTLQTLK	1	S(1): 0.0; S(3): 100.0; T(8): 0.0; T(11): 0.0	233	Reverse	Class I
O75592	1	Probable E3 ubiquitin-protein ligase MYCBP2 OS=Homo sapiens GN=MYCBP2 PE=1 SV=3 - [MYCB2_HUMAN]	O75592	S2774	Probable E3 ubiquitin-protein ligase MYCBP2 (EC 6.3.2.-) (Myc-binding protein 2) (Pam/highwire/rpm-1 protein) (Protein associated with Myc)	MYCBP2 KIAA0916 PAM	PSSSRAESPGPGSRL	0.692521	-0.530071	0.619806	-0.690111	4080000	5900000	9980000	6.99913	143532	Atypical/PIKK/FRAP	FRAP	MPSSSRAEpSPGPGSR	1	S(3): 0.0; S(4): 0.0; S(5): 0.0; S(9): 100.0; S(14): 0.0	205	Reverse	Class I
O75592	1	Probable E3 ubiquitin-protein ligase MYCBP2 OS=Homo sapiens GN=MYCBP2 PE=1 SV=3 - [MYCB2_HUMAN]	O75592	S2831	Probable E3 ubiquitin-protein ligase MYCBP2 (EC 6.3.2.-) (Myc-binding protein 2) (Pam/highwire/rpm-1 protein) (Protein associated with Myc)	MYCBP2 KIAA0916 PAM	LDPPRERSKSDSYTL	1.20919	0.274041	1.08222	0.114	27200000	22500000	49700000	7.69636	148489	AGC/AKT	AKT1	pSKSDSYTLDPDTLRK	1	S(1): 94.1; S(3): 5.9; S(5): 0.0; Y(6): 0.0; T(7): 0.0; T(12): 0.0	127	Reverse	Class I
O75592	1	Probable E3 ubiquitin-protein ligase MYCBP2 OS=Homo sapiens GN=MYCBP2 PE=1 SV=3 - [MYCB2_HUMAN]	O75592	S2833	Probable E3 ubiquitin-protein ligase MYCBP2 (EC 6.3.2.-) (Myc-binding protein 2) (Pam/highwire/rpm-1 protein) (Protein associated with Myc)	MYCBP2 KIAA0916 PAM	PPRERSKSDSYTLDP	1.1534	0.205896	1.0323	0.0458557	28800000	25000000	53800000	7.73078	162926	AGC/AKT	AKT1	SKpSDSYTLDPDTLRK	1	S(1): 5.1; S(3): 94.9; S(5): 0.0; Y(6): 0.0; T(7): 0.0; T(12): 0.0	184	Reverse	Class I
O75592	1	Probable E3 ubiquitin-protein ligase MYCBP2 OS=Homo sapiens GN=MYCBP2 PE=1 SV=3 - [MYCB2_HUMAN]	O75592	S2858	Probable E3 ubiquitin-protein ligase MYCBP2 (EC 6.3.2.-) (Myc-binding protein 2) (Pam/highwire/rpm-1 protein) (Protein associated with Myc)	MYCBP2 KIAA0916 PAM	TEPLRGRSTSPKPKS	1.21507	0.281036	1.08748	0.120995	13000000	10700000	23700000	7.37475	162147			MPLTEPLRGRpSTpSPKPK	2	T(4): 0.0; S(11): 98.0; T(12): 2.3; S(13): 99.7	102	Reverse	Class I
O75592	1	Probable E3 ubiquitin-protein ligase MYCBP2 OS=Homo sapiens GN=MYCBP2 PE=1 SV=3 - [MYCB2_HUMAN]	O75592	S2860	Probable E3 ubiquitin-protein ligase MYCBP2 (EC 6.3.2.-) (Myc-binding protein 2) (Pam/highwire/rpm-1 protein) (Protein associated with Myc)	MYCBP2 KIAA0916 PAM	PLRGRSTSPKPKSVP	1.21507	0.281036	1.08748	0.120995	13000000	10700000	23700000	7.37475	162147			MPLTEPLRGRpSTpSPKPK	2	T(4): 0.0; S(11): 98.0; T(12): 2.3; S(13): 99.7	102	Reverse	Class I
O75592	1	Probable E3 ubiquitin-protein ligase MYCBP2 OS=Homo sapiens GN=MYCBP2 PE=1 SV=3 - [MYCB2_HUMAN]	O75592	S2947	Probable E3 ubiquitin-protein ligase MYCBP2 (EC 6.3.2.-) (Myc-binding protein 2) (Pam/highwire/rpm-1 protein) (Protein associated with Myc)	MYCBP2 KIAA0916 PAM	DEQEMRASPKISRKC	0.677048	-0.56267	0.605958	-0.72271	143000000	211000000	354000000	8.549	164488			APLKDEQEMRApSPK	1	S(12): 100.0	216	Reverse	Class I
O75592	1	Probable E3 ubiquitin-protein ligase MYCBP2 OS=Homo sapiens GN=MYCBP2 PE=1 SV=3 - [MYCB2_HUMAN]	O75592	S3438	Probable E3 ubiquitin-protein ligase MYCBP2 (EC 6.3.2.-) (Myc-binding protein 2) (Pam/highwire/rpm-1 protein) (Protein associated with Myc)	MYCBP2 KIAA0916 PAM	KRTVFQRSYSVVASE	0.646831	-0.62854	0.578913	-0.788581	8410000	13000000	21410000	7.33062	110197			pSYSVVASEYDK	1	S(1): 99.1; Y(2): 0.5; S(3): 0.5; S(7): 0.0; Y(9): 0.0	145	Reverse	Class I
O75592	1	Probable E3 ubiquitin-protein ligase MYCBP2 OS=Homo sapiens GN=MYCBP2 PE=1 SV=3 - [MYCB2_HUMAN]	O75592	S3440	Probable E3 ubiquitin-protein ligase MYCBP2 (EC 6.3.2.-) (Myc-binding protein 2) (Pam/highwire/rpm-1 protein) (Protein associated with Myc)	MYCBP2 KIAA0916 PAM	TVFQRSYSVVASEYD	1.42045	0.506353	1.27131	0.346312	14900000	10500000	25400000	7.40483	117195	AGC/AKT	AKT1	SYpSVVASEYDK	1	S(1): 0.3; Y(2): 0.3; S(3): 99.4; S(7): 0.0; Y(9): 0.0	66	Reverse	Class I
O75592	1	Probable E3 ubiquitin-protein ligase MYCBP2 OS=Homo sapiens GN=MYCBP2 PE=1 SV=3 - [MYCB2_HUMAN]	O75592	S3467	Probable E3 ubiquitin-protein ligase MYCBP2 (EC 6.3.2.-) (Myc-binding protein 2) (Pam/highwire/rpm-1 protein) (Protein associated with Myc)	MYCBP2 KIAA0916 PAM	IPRRRVNSGDTEVGS	1.10988	0.150401	0.993341	-0.00963942	30000000	27000000	57000000	7.75587	117942	AGC/AKT	AKT1	VNpSGDTEVGSSLLR	1	S(3): 100.0; T(6): 0.0; S(10): 0.0; S(11): 0.0	98	Reverse	Class I
O75592	1	Probable E3 ubiquitin-protein ligase MYCBP2 OS=Homo sapiens GN=MYCBP2 PE=1 SV=3 - [MYCB2_HUMAN]	O75592	S633	Probable E3 ubiquitin-protein ligase MYCBP2 (EC 6.3.2.-) (Myc-binding protein 2) (Pam/highwire/rpm-1 protein) (Protein associated with Myc)	MYCBP2 KIAA0916 PAM	KDAIYSDSSSLVTDL	1.00503	0.00723157	0.899497	-0.152809	43600000	43400000	87000000	7.93952	70136			DAIpYSDpSSSLVTDLK	2	Y(4): 99.6; S(5): 5.4; S(7): 89.5; S(8): 5.1; S(9): 0.3; T(12): 0.0	89	Reverse	Class I
O75592	1	Probable E3 ubiquitin-protein ligase MYCBP2 OS=Homo sapiens GN=MYCBP2 PE=1 SV=3 - [MYCB2_HUMAN]	O75592	T2645	Probable E3 ubiquitin-protein ligase MYCBP2 (EC 6.3.2.-) (Myc-binding protein 2) (Pam/highwire/rpm-1 protein) (Protein associated with Myc)	MYCBP2 KIAA0916 PAM	LLDQNSQTPPPSPFS	1.28535	0.362158	1.15039	0.202118	13500000	10500000	24000000	7.38021	146282	Atypical/PIKK/FRAP	FRAP	HEDEQALLDQNSQpTPPPSPFSVQAFNK	1	S(12): 0.0; T(14): 100.0; S(18): 0.0; S(21): 0.0	312	Reverse	Class I
O75592	1	Probable E3 ubiquitin-protein ligase MYCBP2 OS=Homo sapiens GN=MYCBP2 PE=1 SV=3 - [MYCB2_HUMAN]	O75592	Y630	Probable E3 ubiquitin-protein ligase MYCBP2 (EC 6.3.2.-) (Myc-binding protein 2) (Pam/highwire/rpm-1 protein) (Protein associated with Myc)	MYCBP2 KIAA0916 PAM	MFGKDAIYSDSSSLV	1.00503	0.00723157	0.899497	-0.152809	43600000	43400000	87000000	7.93952	70136			DAIpYSDpSSSLVTDLK	2	Y(4): 99.6; S(5): 5.4; S(7): 89.5; S(8): 5.1; S(9): 0.3; T(12): 0.0	89	Reverse	Class I
O75665	1	Oral-facial-digital syndrome 1 protein OS=Homo sapiens GN=OFD1 PE=1 SV=1 - [OFD1_HUMAN]	O75665	S686	Oral-facial-digital syndrome 1 protein (Protein 71-7A)	OFD1 CXorf5	FKNITSSSPERHIFG	1.16279	0.217591	1.0407	0.057551	3800000	3270000	7070000	6.84942	152002			NITSSpSPERHIFGEDR	1	T(3): 0.0; S(4): 0.0; S(5): 0.0; S(6): 100.0	227	Reverse	Class I
O75674	1	TOM1-like protein 1 OS=Homo sapiens GN=TOM1L1 PE=1 SV=1 - [TM1L1_HUMAN]	O75674	S323	TOM1-like protein 1 (Src-activating and signaling molecule protein) (Target of Myb-like protein 1)	TOM1L1 SRCASM	DLLDLSPSPRMPRAT	0.911577	-0.133564	0.815861	-0.293604	16800000	18500000	35300000	7.54777	29537			EATNTTSEPSAPSQDLLDLSPpSPR	1	T(3): 0.0; T(5): 0.0; T(6): 0.0; S(7): 0.0; S(10): 0.0; S(13): 0.0; S(20): 0.9; S(22): 99.1	69	Reverse	Class I
O75676	1	Ribosomal protein S6 kinase alpha-4 OS=Homo sapiens GN=RPS6KA4 PE=1 SV=1 - [KS6A4_HUMAN]	O75676	S343	Ribosomal protein S6 kinase alpha-4 (S6K-alpha-4) (EC 2.7.11.1) (90 kDa ribosomal protein S6 kinase 4) (Nuclear mitogen- and stress-activated protein kinase 2) (Ribosomal protein kinase B) (RSKB)	RPS6KA4 MSK2	TRLEPVYSPPGSPPP	1.49031	0.575615	1.33383	0.415575	759000	509000	1268000	6.10312	98125	Atypical/PIKK/FRAP	FRAP	LEPVpYpSPPGSPPPGDPR	2	Y(5): 99.4; S(6): 99.4; S(10): 1.2	55	Reverse	Class I
O75676	1	Ribosomal protein S6 kinase alpha-4 OS=Homo sapiens GN=RPS6KA4 PE=1 SV=1 - [KS6A4_HUMAN]	O75676	S347	Ribosomal protein S6 kinase alpha-4 (S6K-alpha-4) (EC 2.7.11.1) (90 kDa ribosomal protein S6 kinase 4) (Nuclear mitogen- and stress-activated protein kinase 2) (Ribosomal protein kinase B) (RSKB)	RPS6KA4 MSK2	PVYSPPGSPPPGDPR	2.42131	1.27579	2.16707	1.11575	6270000	2590000	8860000	6.94743	28099	Atypical/PIKK/FRAP	FRAP	LEPVYSPPGpSPPPGDPR	1	Y(5): 0.0; S(6): 0.0; S(10): 100.0	127	Reverse	Class I
O75676	1	Ribosomal protein S6 kinase alpha-4 OS=Homo sapiens GN=RPS6KA4 PE=1 SV=1 - [KS6A4_HUMAN]	O75676	S681	Ribosomal protein S6 kinase alpha-4 (S6K-alpha-4) (EC 2.7.11.1) (90 kDa ribosomal protein S6 kinase 4) (Nuclear mitogen- and stress-activated protein kinase 2) (Ribosomal protein kinase B) (RSKB)	RPS6KA4 MSK2	LQDGSARSSPPLRTP	0.74239	-0.42975	0.664439	-0.58979	525000	708000	1233000	6.09096	58806	TKL/RAF	RAF1	pSSPPLRTPDVLESSGPAVR	1	S(1): 92.4; S(2): 7.6; T(7): 0.0; S(13): 0.0; S(14): 0.0	112	Reverse	Class I
O75676	1	Ribosomal protein S6 kinase alpha-4 OS=Homo sapiens GN=RPS6KA4 PE=1 SV=1 - [KS6A4_HUMAN]	O75676	S682	Ribosomal protein S6 kinase alpha-4 (S6K-alpha-4) (EC 2.7.11.1) (90 kDa ribosomal protein S6 kinase 4) (Nuclear mitogen- and stress-activated protein kinase 2) (Ribosomal protein kinase B) (RSKB)	RPS6KA4 MSK2	QDGSARSSPPLRTPD	1.08696	0.120294	0.972826	-0.0397462	117000000	108000000	225000000	8.35218	48958	Atypical/PIKK/FRAP	FRAP	SpSPPLRTPDVLESSGPAVR	1	S(1): 8.9; S(2): 91.1; T(7): 0.0; S(13): 0.0; S(14): 0.0	182	Reverse	Class I
O75676	1	Ribosomal protein S6 kinase alpha-4 OS=Homo sapiens GN=RPS6KA4 PE=1 SV=1 - [KS6A4_HUMAN]	O75676	S745	Ribosomal protein S6 kinase alpha-4 (S6K-alpha-4) (EC 2.7.11.1) (90 kDa ribosomal protein S6 kinase 4) (Nuclear mitogen- and stress-activated protein kinase 2) (Ribosomal protein kinase B) (RSKB)	RPS6KA4 MSK2	ATASRRGSPAPANPG	1.23305	0.302226	1.10358	0.142186	419000	340000	759000	5.88024	138743	Atypical/PIKK/FRAP	FRAP	RGpSPAPANPGR	1	S(3): 100.0	171	Reverse	Class I
O75676	1	Ribosomal protein S6 kinase alpha-4 OS=Homo sapiens GN=RPS6KA4 PE=1 SV=1 - [KS6A4_HUMAN]	O75676	Y342	Ribosomal protein S6 kinase alpha-4 (S6K-alpha-4) (EC 2.7.11.1) (90 kDa ribosomal protein S6 kinase 4) (Nuclear mitogen- and stress-activated protein kinase 2) (Ribosomal protein kinase B) (RSKB)	RPS6KA4 MSK2	FTRLEPVYSPPGSPP	1.49031	0.575615	1.33383	0.415575	759000	509000	1268000	6.10312	98125	TK/Src	SRC	LEPVpYpSPPGSPPPGDPR	2	Y(5): 99.4; S(6): 99.4; S(10): 1.2	55	Reverse	Class I
O75683	1	Surfeit locus protein 6 OS=Homo sapiens GN=SURF6 PE=1 SV=3 - [SURF6_HUMAN]	O75683	S138	Surfeit locus protein 6	SURF6 SURF-6	QGSAKELSPAALEKR	1.06045	0.0846703	0.949099	-0.0753701	338000000	319000000	657000000	8.81757	116995			ELpSPAALEK	1	S(3): 100.0	145	Reverse	Class I
O75691	1	Small subunit processome component 20 homolog OS=Homo sapiens GN=UTP20 PE=1 SV=1 - [UTP20_HUMAN]	O75691	T1741	Small subunit processome component 20 homolog (Down-regulated in metastasis protein) (Novel nucleolar protein 73) (NNP73) (Protein Key-1A6)	UTP20 DRIM	SDNGQPGTPDPADSG	1.19904	0.261881	1.07314	0.10184	93100000	77600000	170700000	8.23223	22578			SLSDNGQPGpTPDPADSGGTSAK	1	S(1): 0.0; S(3): 0.0; T(10): 100.0; S(16): 0.0; T(19): 0.0; S(20): 0.0	270	Reverse	Class I
O75694	1	Nuclear pore complex protein Nup155 OS=Homo sapiens GN=NUP155 PE=1 SV=1 - [NU155_HUMAN]	O75694	S992	Nuclear pore complex protein Nup155 (155 kDa nucleoporin) (Nucleoporin Nup155)	NUP155 KIAA0791	QSKAAPQSPSVPKKP	1.11359	0.155213	0.996659	-0.00482776	299000000	269000000	568000000	8.75435	22238	CMGC/CDK	CDK4	AAPQpSPSVPK	1	S(5): 100.0; S(7): 0.0	101	Reverse	Class I
O75717	1	WD repeat and HMG-box DNA-binding protein 1 OS=Homo sapiens GN=WDHD1 PE=1 SV=1 - [WDHD1_HUMAN]	O75717	S383	WD repeat and HMG-box DNA-binding protein 1 (Acidic nucleoplasmic DNA-binding protein 1) (And-1)	WDHD1 AND1	ILEDDENSVDISMLK	1.36612	0.450084	1.22268	0.290044	24300000	17800000	42100000	7.62428	61604			SHILEDDENpSVDISMLK	1	S(1): 0.0; S(10): 100.0; S(14): 0.0	382	Reverse	Class I
O75717	1	WD repeat and HMG-box DNA-binding protein 1 OS=Homo sapiens GN=WDHD1 PE=1 SV=1 - [WDHD1_HUMAN]	O75717	S868	WD repeat and HMG-box DNA-binding protein 1 (Acidic nucleoplasmic DNA-binding protein 1) (And-1)	WDHD1 AND1	VEEDAEDSGEADDEE	1.37363	0.45799	1.2294	0.297949	15200000	11100000	26300000	7.41996	78901	CMGC/MAPK	Erk2	NQVEEDAEDpSGEADDEEKPEIHKPGQNSFSK	1	S(10): 99.9; S(28): 0.1; S(30): 0.0	38	Reverse	Class I
O75764	1	Transcription elongation factor A protein 3 OS=Homo sapiens GN=TCEA3 PE=2 SV=2 - [TCEA3_HUMAN]	O75764	S140	Transcription elongation factor A protein 3 (Transcription elongation factor S-II protein 3) (Transcription elongation factor TFIIS.h)	TCEA3 TFIISH	SKSSASSSPKRPSVE	1.25945	0.332789	1.1272	0.172749	2090000	1660000	3750000	6.57403	164455			SSASSpSPKRPSVER	1	S(1): 0.0; S(2): 0.0; S(4): 0.0; S(5): 0.1; S(6): 99.9; S(11): 0.0	162	Reverse	Class I
O75781	1	Paralemmin OS=Homo sapiens GN=PALM PE=1 SV=2 - [PALM_HUMAN]	O75781	S116	Paralemmin-1 (Paralemmin)	PALM KIAA0270	KENAAAPSPVRAPAP	1.16009	0.21424	1.03828	0.0541998	8730000	7520000	16250000	7.21085	43505			ENAAAPpSPVRAPAPSPAK	1	S(7): 100.0; S(15): 0.0	261	Reverse	Class I
[truncated: 9,456 more rows]
[truncated: 25 more columns]
