# Supplementary material for: Quantitative global phosphoproteomics of human umbilical vein endothelial cells after activation of the Rap signaling pathway
Source: Royal Society of Chemistry journal article supplement (doi:10.1039/c3mb25524g), 2013-01-21
Supplement: c3mb25524g_10.xlsx [file c3mb25524g_10.xlsx]

## Sheet: Co-Regulated
Protein Group Accessions	# of Protein Groups	Protein Descriptions	Acc. # 1	Sites Acc. # 1	Protein Names Acc. # 1	Gene Names Acc. # 1	Phosposite Sequence Context	Fold Regulated Forward	Fold Regulated Reverse	Regulation Direction	Ratio (Medium/Light) Forward	Ratio (Light/Medium) Reverse	Log2 Ratio (Medium/Light) Forward	Log2 Ratio (Light/Medium) Reverse	Normalized Ratio (Medium/Light) Forward	Normalized Ratio (Light/Medium) Reverse	Normalized Log2 Ratio (Medium/Light) Forward	Normalized Log2 Ratio (Light/Medium) Reverse	Intensity Light Forward	Intensity Light Reverse	Intensity Medium Forward	Intensity Medium Reverse	Intensity (Light+Medium) Forward	Intensity (Light+Medium) Reverse	Log10 Intensity (Light+Medium) Forward	Log10 Intensity (Light+Medium) Reverse	Quan Result ID Forward	Quan Result ID Reverse	Predicted Kinase Group/Family/Subfamily	Predicted Kinases	Acc. # 2	Sites Acc. # 2	Protein Names Acc. # 2	Gene Names Acc. # 2	Acc. # 3	Sites Acc. # 3	Protein Names Acc. # 3	Gene Names Acc. # 3	Acc. # 4	Sites Acc. # 4	Protein Names Acc. # 4	Gene Names Acc. # 4	Acc. # 5	Sites Acc. # 5	Protein Names Acc. # 5	Gene Names Acc. # 5	Acc. # 6	Sites Acc. # 6	Protein Names Acc. # 6
Q9C0C2	1	182 kDa tankyrase 1-binding protein OS=Homo sapiens GN=TNKS1BP1 PE=1 SV=3 - [TB182_HUMAN]	Q9C0C2	S429	182 kDa tankyrase-1-binding protein	TNKS1BP1 KIAA1741 TAB182	SLVQRRFSEGVLQSP	1.54453	1.57293	Up	1.526	1.75747	0.609755	0.813499	1.54453	1.57293	0.627172	0.653459	479000000	285000000	730000000	162000000	1209000000	447000000	9.08243	8.65031	37132	52072
Q9C0C2	1	182 kDa tankyrase 1-binding protein OS=Homo sapiens GN=TNKS1BP1 PE=1 SV=3 - [TB182_HUMAN]	Q9C0C2	S1652	182 kDa tankyrase-1-binding protein	TNKS1BP1 KIAA1741 TAB182	VNLFPGLSPSALKAK	1.78339	1.73184	Down	0.554	0.645161	-0.852042	-0.632268	0.560729	0.577419	-0.834625	-0.792309	21500000	64300000	11900000	99600000	33400000	163900000	7.52375	8.21458	6777	121053
Q2PPJ7	1	250 kDa substrate of Akt OS=Homo sapiens GN=C20orf74 PE=1 SV=2 - [AS250_HUMAN]	Q2PPJ7	S486	Ral GTPase-activating protein subunit alpha-2 (250 kDa substrate of Akt) (AS250) (p220)	RALGAPA2 C20orf74 KIAA1272	SSWGRTYSFTSAMSR	1.73583	1.5897	Up	1.715	1.7762	0.778209	0.828793	1.73583	1.5897	0.795626	0.668753	1900000	64000000	3250000	36000000	5150000	100000000	6.71181	8	12214	27274
Q2PPJ7	1	250 kDa substrate of Akt OS=Homo sapiens GN=C20orf74 PE=1 SV=2 - [AS250_HUMAN]	Q2PPJ7	T484	Ral GTPase-activating protein subunit alpha-2 (250 kDa substrate of Akt) (AS250) (p220)	RALGAPA2 C20orf74 KIAA1272	RSSSWGRTYSFTSAM	1.70951	2.20988	Up	1.689	2.46914	0.756169	1.30401	1.70951	2.20988	0.773586	1.14397	26700000	48200000	45000000	19500000	71700000	67700000	7.85552	7.83059	5567	24301
O60825	1	6-phosphofructo-2-kinase/fructose-2,6-biphosphatase 2 OS=Homo sapiens GN=PFKFB2 PE=1 SV=2 - [F262_HUMAN]	O60825	S466	6-phosphofructo-2-kinase/fructose-2,6-bisphosphatase 2 (6PF-2-K/Fru-2,6-P2ase 2) (PFK/FBPase 2) (6PF-2-K/Fru-2,6-P2ase heart-type isozyme) [Includes: 6-phosphofructo-2-kinase (EC 2.7.1.105); Fructose-2,6-bisphosphatase (EC 3.1.3.46)]	PFKFB2	PVRMRRNSFTPLSSS	1.8998	1.86071	Up	1.877	2.079	0.908429	1.05589	1.8998	1.86071	0.925846	0.895851	4070000	6290000	7640000	3030000	11710000	9320000	7.06856	6.96942	40828	60938	AGC/AKT	AKT1
Q8TED9	1	Actin filament-associated protein 1-like 1 OS=Homo sapiens GN=AFAP1L1 PE=1 SV=2 - [AF1L1_HUMAN]	Q8TED9	S747	Actin filament-associated protein 1-like 1 (AFAP1-like protein 1)	AFAP1L1	ELRKRSPSIVASNQG	1.69737	1.78643	Up	1.677	1.99601	0.745883	0.997117	1.69737	1.78643	0.7633	0.837077	80400000	97400000	135000000	48800000	215400000	146200000	8.33325	8.16495	39317	59376
O14639	1	Actin-binding LIM protein 1 OS=Homo sapiens GN=ABLIM1 PE=1 SV=3 - [ABLM1_HUMAN]	O14639	S587	Actin-binding LIM protein 1 (abLIM-1) (Actin-binding LIM protein family member 1) (Actin-binding double zinc finger protein) (LIMAB1) (Limatin)	ABLIM1 ABLIM KIAA0059 LIMAB1	PDMKRRSSGREEDDE	2.53036	1.56469	Up	2.5	1.74825	1.32193	0.805913	2.53036	1.56469	1.33935	0.645873	3770000	2760000	9430000	1580000	13200000	4340000	7.12057	6.63749	36665	130927
O14639	1	Actin-binding LIM protein 1 OS=Homo sapiens GN=ABLIM1 PE=1 SV=3 - [ABLM1_HUMAN]	O14639	S458	Actin-binding LIM protein 1 (abLIM-1) (Actin-binding LIM protein family member 1) (Actin-binding double zinc finger protein) (LIMAB1) (Limatin)	ABLIM1 ABLIM KIAA0059 LIMAB1	TSQGSINSPVYSRHS	2.44554	2.16425	Down	0.404	0.516262	-1.30757	-0.953824	0.408907	0.462055	-1.29016	-1.11386	199000000	41700000	80200000	80800000	279200000	122500000	8.44592	8.08814	3643	114108
P55196	1	Afadin OS=Homo sapiens GN=MLLT4 PE=1 SV=2 - [AFAD_HUMAN]	P55196	S215	Afadin (ALL1-fused gene from chromosome 6 protein) (Protein AF-6)	MLLT4 AF6	TSFTRTISNPEVVMK	1.70345	2.38212	Down	0.58	0.469043	-0.785875	-1.09221	0.587045	0.419794	-0.768458	-1.25225	26600000	50700000	15400000	108000000	42000000	158700000	7.62325	8.20058	104487	114530	STE/STE11	MAP3K1
P55196	1	Afadin OS=Homo sapiens GN=MLLT4 PE=1 SV=2 - [AFAD_HUMAN]	P55196	T1215	Afadin (ALL1-fused gene from chromosome 6 protein) (Protein AF-6)	MLLT4 AF6	TYTREYFTFPASKSQ	1.95644	1.92291	Down	0.505	0.581058	-0.985645	-0.783247	0.511134	0.520046	-0.968228	-0.943288	233000000	208000000	118000000	359000000	351000000	567000000	8.54531	8.75358	6276	119740
P55196	1	Afadin OS=Homo sapiens GN=MLLT4 PE=1 SV=2 - [AFAD_HUMAN]	P55196	T1313	Afadin (ALL1-fused gene from chromosome 6 protein) (Protein AF-6)	MLLT4 AF6	NHSSKSVTPASTLTK	1.82963	2.25698	Down	0.54	0.49505	-0.888969	-1.01436	0.546559	0.443069	-0.871552	-1.1744	24600000	76400000	13300000	154000000	37900000	230400000	7.57864	8.36248	69934	22809
P55196	1	Afadin OS=Homo sapiens GN=MLLT4 PE=1 SV=2 - [AFAD_HUMAN]	P55196	T1472	Afadin (ALL1-fused gene from chromosome 6 protein) (Protein AF-6)	MLLT4 AF6	QPQQQPRTIERRDLQ	3.0875	2.89944	Down	0.32	0.385356	-1.64386	-1.37573	0.323887	0.344894	-1.62644	-1.53577	20300000	4690000	6510000	12200000	26810000	16890000	7.4283	7.22763	47534	72729
P55196	1	Afadin OS=Homo sapiens GN=MLLT4 PE=1 SV=2 - [AFAD_HUMAN]	P55196	T550	Afadin (ALL1-fused gene from chromosome 6 protein) (Protein AF-6)	MLLT4 AF6	RVSSASSTAERGMVK	1.56577	2.1486	Down	0.631	0.520021	-0.664288	-0.943359	0.638664	0.465419	-0.646871	-1.1034	18200000	2320000	11500000	4460000	29700000	6780000	7.47276	6.83123	39244	143762
Q9UKA4	1	A-kinase anchor protein 11 OS=Homo sapiens GN=AKAP11 PE=1 SV=1 - [AKA11_HUMAN]	Q9UKA4	S1103	A-kinase anchor protein 11 (AKAP-11) (A-kinase anchor protein 220 kDa) (AKAP 220) (hAKAP220) (Protein kinase A-anchoring protein 11) (PRKA11)	AKAP11 AKAP220 KIAA0629	VIPDTPPSTPLVPSR	2.57963	1.59888	Down	0.383	0.698812	-1.38458	-0.517024	0.387652	0.625437	-1.36717	-0.677064	1560000	3370000	597000	4820000	2157000	8190000	6.33385	6.91328	22595	99264	CMGC/GSK	GSK3A, GSK3B
Q12802	1	A-kinase anchor protein 13 OS=Homo sapiens GN=AKAP13 PE=1 SV=2 - [AKP13_HUMAN]	Q12802	S1932	A-kinase anchor protein 13 (AKAP-13) (AKAP-Lbc) (Breast cancer nuclear receptor-binding auxiliary protein) (Guanine nucleotide exchange factor Lbc) (Human thyroid-anchoring protein 31) (Lymphoid blast crisis oncogene) (LBC oncogene) (Non-oncogenic Rho GTPase-specific GTP exchange factor) (Protein kinase A-anchoring protein 13) (PRKA13) (p47)	AKAP13 BRX HT31 LBC	FLSHSTDSLNKISKV	1.70345	1.77542	Down	0.58	0.629327	-0.785875	-0.668119	0.587045	0.563247	-0.768458	-0.82816	60600000	82100000	35200000	131000000	95800000	213100000	7.98137	8.32858	4226	114987
Q96Q42	1	Alsin OS=Homo sapiens GN=ALS2 PE=1 SV=1 - [ALS2_HUMAN]	Q96Q42	S492	Alsin (Amyotrophic lateral sclerosis 2 chromosomal region candidate gene 6 protein) (Amyotrophic lateral sclerosis 2 protein)	ALS2 ALS2CR6 KIAA1563	PGLLSQVSPRLLRKA	1.52469	1.5743	Down	0.648	0.709723	-0.625934	-0.494672	0.65587	0.635202	-0.608517	-0.654712	5210000	35900000	3380000	50600000	8590000	86500000	6.93399	7.93702	108017	120972	CMGC/CDK	CDK5
Q8IWZ3	1	Ankyrin repeat and KH domain-containing protein 1 OS=Homo sapiens GN=ANKHD1 PE=1 SV=1 - [ANKH1_HUMAN]	Q8IWZ3	T1538	Ankyrin repeat and KH domain-containing protein 1 (HIV-1 Vpr-binding ankyrin repeat protein) (Multiple ankyrin repeats single KH domain) (hMASK)	ANKHD1 KIAA1085 MASK VBARP PP2500	KRANVVTTPSTNRKN	2.25057	1.92626	Down	0.439	0.580046	-1.18771	-0.78576	0.444332	0.519142	-1.17029	-0.9458	30000000	7590000	13100000	13100000	43100000	20690000	7.63448	7.31576	52134	83147
Q13625	1	Apoptosis-stimulating of p53 protein 2 OS=Homo sapiens GN=TP53BP2 PE=1 SV=2 - [ASPP2_HUMAN]	Q13625	S737	Apoptosis-stimulating of p53 protein 2 (Bcl2-binding protein) (Bbp) (Renal carcinoma antigen NY-REN-51) (Tumor suppressor p53-binding protein 2) (53BP2) (p53-binding protein 2) (p53BP2)	TP53BP2 ASPP2 BBP	RPLKKRSSITEPEGP	1.51417	1.93305	Up	1.496	2.15983	0.58111	1.11092	1.51417	1.93305	0.598527	0.950875	8100000	12000000	12100000	5530000	20200000	17530000	7.30535	7.24378	91996	78495
P53367	1	Arfaptin-1 OS=Homo sapiens GN=ARFIP1 PE=1 SV=2 - [ARFP1_HUMAN]	P53367	S132	Arfaptin-1 (ADP-ribosylation factor-interacting protein 1)	ARFIP1	LELVRKWSLNTYKCT	2.02733	2.11085	Up	2.003	2.35849	1.00216	1.23786	2.02733	2.11085	1.01958	1.07782	23600000	47200000	47300000	20000000	70900000	67200000	7.85065	7.82737	40942	145545
P53367	1	Arfaptin-1 OS=Homo sapiens GN=ARFIP1 PE=1 SV=2 - [ARFP1_HUMAN]	P53367	S69	Arfaptin-1 (ADP-ribosylation factor-interacting protein 1)	ARFIP1	EAGAFQGSPAPPLPS	3.41869	2.55084	Down	0.289	0.43802	-1.79086	-1.19093	0.29251	0.392028	-1.77344	-1.35097	2860000	8260000	826000	18900000	3686000	27160000	6.56656	7.43393	107253	29623
O00192	1	Armadillo repeat protein deleted in velo-cardio-facial syndrome OS=Homo sapiens GN=ARVCF PE=1 SV=1 - [ARVC_HUMAN]	O00192	S203	Armadillo repeat protein deleted in velo-cardio-facial syndrome	ARVCF	RDSPSYGSLSRGLGM	1.85714	1.99888	Down	0.532	0.558971	-0.910502	-0.839153	0.538462	0.500279	-0.893085	-0.999194	432000000	61700000	230000000	110000000	662000000	171700000	8.82086	8.23477	3987	26619
O95817	1	BAG family molecular chaperone regulator 3 OS=Homo sapiens GN=BAG3 PE=1 SV=3 - [BAG3_HUMAN]	O95817	S136	BAG family molecular chaperone regulator 3 (BAG-3) (Bcl-2-associated athanogene 3) (Bcl-2-binding protein Bis) (Docking protein CAIR-1)	BAG3 BIS	AAPQRSQSPLRGMPE	1.72125	1.61006	Down	0.574	0.693963	-0.800877	-0.52707	0.580972	0.621096	-0.78346	-0.687111	37700000	9190000	21700000	13300000	59400000	22490000	7.77379	7.35199	75282	127415	Atypical/PIKK/FRAP	FRAP
Q9HCM4	1	Band 4.1-like protein 5 OS=Homo sapiens GN=EPB41L5 PE=1 SV=3 - [E41L5_HUMAN]	Q9HCM4	S550	Band 4.1-like protein 5	EPB41L5 KIAA1548	CLNNVIESPGLNVMR	1.69759	1.76313	Down	0.582	0.633714	-0.780909	-0.658097	0.589069	0.567174	-0.763492	-0.818138	8710000	3210000	5080000	5060000	13790000	8270000	7.13956	6.91751	71681	1093
O15155	1	BET1 homolog OS=Homo sapiens GN=BET1 PE=1 SV=1 - [BET1_HUMAN]	O15155	S50	BET1 homolog (hBET1) (Golgi vesicular membrane-trafficking protein p18)	BET1	VTAIKSLSIEIGHEV	1.89777	1.73114	Up	1.875	1.93424	0.906891	0.951764	1.89777	1.73114	0.924308	0.791723	3060000	14600000	5740000	7550000	8800000	22150000	6.94448	7.34537	80153	55685
Q9UQB8	1	Brain-specific angiogenesis inhibitor 1-associated protein 2 OS=Homo sapiens GN=BAIAP2 PE=1 SV=1 - [BAIP2_HUMAN]	Q9UQB8	T340	Brain-specific angiogenesis inhibitor 1-associated protein 2 (BAI-associated protein 2) (BAI1-associated protein 2) (Protein BAP2) (Fas ligand-associated factor 3) (FLAF3) (Insulin receptor substrate p53/p58) (IRS-58) (IRSp53/58) (Insulin receptor substrate protein of 53 kDa) (IRSp53) (Insulin receptor substrate p53)	BAIAP2	LSDSYSNTLPVRKSV	2.18102	1.97207	Down	0.453	0.566572	-1.14242	-0.819668	0.458502	0.507082	-1.125	-0.979709	38900000	25400000	17600000	44700000	56500000	70100000	7.75205	7.84572	40660	60778	TKL/RAF	RAF1
Q9UQB8	1	Brain-specific angiogenesis inhibitor 1-associated protein 2 OS=Homo sapiens GN=BAIAP2 PE=1 SV=1 - [BAIP2_HUMAN]	Q9UQB8	T360	Brain-specific angiogenesis inhibitor 1-associated protein 2 (BAI-associated protein 2) (BAI1-associated protein 2) (Protein BAP2) (Fas ligand-associated factor 3) (FLAF3) (Insulin receptor substrate p53/p58) (IRS-58) (IRSp53/58) (Insulin receptor substrate protein of 53 kDa) (IRSp53) (Insulin receptor substrate p53)	BAIAP2	YATTENKTLPRSSSM	3.20779	2.6905	Down	0.308	0.415282	-1.699	-1.26784	0.311741	0.371678	-1.68158	-1.42788	13600000	4870000	4210000	11700000	17810000	16570000	7.25066	7.21932	78139	134445	TKL/RAF	RAF1
O75815	1	Breast cancer anti-estrogen resistance protein 3 OS=Homo sapiens GN=BCAR3 PE=1 SV=1 - [BCAR3_HUMAN]	O75815	S8	Breast cancer anti-estrogen resistance protein 3 (Novel SH2-containing protein 2) (SH2 domain-containing protein 3B)	BCAR3 NSP2 SH2D3B UNQ271/PRO308	MAAGKFASLPRNMPV	1.89272	2.11285	Down	0.522	0.528821	-0.937878	-0.919149	0.52834	0.473295	-0.920461	-1.07919	44200000	32600000	23100000	61600000	67300000	94200000	7.82802	7.97405	4805	27544
Q05682	1	Caldesmon OS=Homo sapiens GN=CALD1 PE=1 SV=2 - [CALD1_HUMAN]	Q05682	S759	Caldesmon (CDM)	CALD1 CAD CDM	KTPDGNKSPAPKPSD	1.52941	1.51061	Down	0.646	0.739645	-0.630394	-0.435095	0.653846	0.661982	-0.612977	-0.595136	190000000	125000000	123000000	169000000	313000000	294000000	8.49554	8.46835	50737	78716	CMGC/CDK/CDC2	CDC2
P35221	1	Catenin alpha-1 OS=Homo sapiens GN=CTNNA1 PE=1 SV=1 - [CTNA1_HUMAN]	P35221	T42	Catenin alpha-1 (Alpha E-catenin) (Cadherin-associated protein) (Renal carcinoma antigen NY-REN-13)	CTNNA1	QVTTLVNTNSKGPSN	2.75209	2.68939	Down	0.359	0.415455	-1.47794	-1.26724	0.36336	0.371832	-1.46053	-1.42728	11900000	65400000	4260000	157000000	16160000	222400000	7.20844	8.34713	107947	120742
O60716	1	Catenin delta-1 OS=Homo sapiens GN=CTNND1 PE=1 SV=1 - [CTND1_HUMAN]	O60716	S352	Catenin delta-1 (Cadherin-associated Src substrate) (CAS) (p120 catenin) (p120(ctn)) (p120(cas))	CTNND1 KIAA0384	GSLASLDSLRKGGPP	2.81481	3.72291	Down	0.351	0.30012	-1.51046	-1.73639	0.355263	0.268607	-1.49304	-1.89643	19500000	11900000	6860000	39800000	26360000	51700000	7.42095	7.71349	37613	51955
O60716	1	Catenin delta-1 OS=Homo sapiens GN=CTNND1 PE=1 SV=1 - [CTND1_HUMAN]	O60716	T199	Catenin delta-1 (Cadherin-associated Src substrate) (CAS) (p120 catenin) (p120(ctn)) (p120(cas))	CTNND1 KIAA0384	PYVGQAGTATLPRNF	1.99194	1.96201	Down	0.496	0.569476	-1.01159	-0.812293	0.502024	0.509681	-0.994171	-0.972333	20700000	146000000	10300000	257000000	31000000	403000000	7.49136	8.60531	70953	117003
O60716	1	Catenin delta-1 OS=Homo sapiens GN=CTNND1 PE=1 SV=1 - [CTND1_HUMAN]	O60716	T201	Catenin delta-1 (Cadherin-associated Src substrate) (CAS) (p120 catenin) (p120(ctn)) (p120(cas))	CTNND1 KIAA0384	VGQAGTATLPRNFHY	2.03292	1.87039	Down	0.486	0.597372	-1.04097	-0.7433	0.491903	0.534648	-1.02355	-0.90334	181000000	188000000	87900000	314000000	268900000	502000000	8.42959	8.7007	5033	27880
O60716	1	Catenin delta-1 OS=Homo sapiens GN=CTNND1 PE=1 SV=1 - [CTND1_HUMAN]	O60716	T59	Catenin delta-1 (Cadherin-associated Src substrate) (CAS) (p120 catenin) (p120(ctn)) (p120(cas))	CTNND1 KIAA0384	NPLMANGTLTRRHQN	2.38072	2.41341	Down	0.415	0.462963	-1.26882	-1.11103	0.42004	0.414352	-1.2514	-1.27107	160000000	60200000	66400000	130000000	226400000	190200000	8.35488	8.27921	37164	52114
O60716	1	Catenin delta-1 OS=Homo sapiens GN=CTNND1 PE=1 SV=1 - [CTND1_HUMAN]	O60716	T98	Catenin delta-1 (Cadherin-associated Src substrate) (CAS) (p120 catenin) (p120(ctn)) (p120(cas))	CTNND1 KIAA0384	HSHLLYSTIPRMQEP	2.53985	2.64022	Down	0.389	0.423191	-1.36216	-1.24062	0.393725	0.378756	-1.34474	-1.40066	180000000	140000000	70000000	330000000	250000000	470000000	8.39794	8.6721	48912	74050
O60716	1	Catenin delta-1 OS=Homo sapiens GN=CTNND1 PE=1 SV=1 - [CTND1_HUMAN]	O60716	Y96	Catenin delta-1 (Cadherin-associated Src substrate) (CAS) (p120 catenin) (p120(ctn)) (p120(cas))	CTNND1 KIAA0384	QDHSHLLYSTIPRMQ	2.65591	2.71397	Down	0.372	0.411692	-1.42663	-1.28036	0.376518	0.368464	-1.40921	-1.4404	70600000	70400000	26300000	171000000	96900000	241400000	7.98632	8.38274	49099	74090	TK/Fak	FAK, PYK2
Q9Y5K6	1	CD2-associated protein OS=Homo sapiens GN=CD2AP PE=1 SV=1 - [CD2AP_HUMAN]	Q9Y5K6	S458	CD2-associated protein (Adapter protein CMS) (Cas ligand with multiple SH3 domains)	CD2AP	QLPLRPKSVDFDSLT	1.54757	1.53253	Up	1.529	1.71233	0.612588	0.77596	1.54757	1.53253	0.630005	0.615919	145000000	624000000	222000000	364000000	367000000	988000000	8.56467	8.99476	6375	20476	STE/STE20	MYO3A
P48960	1	CD97 antigen OS=Homo sapiens GN=CD97 PE=1 SV=4 - [CD97_HUMAN]	P48960	S831	CD97 antigen (Leukocyte antigen CD97) (CD antigen CD97) [Cleaved into: CD97 antigen subunit alpha; CD97 antigen subunit beta]	CD97	QTRALRASESGI***	1.52935	1.55113	Up	1.511	1.7331	0.595504	0.793357	1.52935	1.55113	0.612921	0.633316	23100000	16400000	34900000	9450000	58000000	25850000	7.76343	7.41246	4384	27078
Q5SW79	1	Centrosomal protein of 170 kDa OS=Homo sapiens GN=CEP170 PE=1 SV=1 - [CE170_HUMAN]	Q5SW79	T644	Centrosomal protein of 170 kDa (Cep170) (KARP-1-binding protein) (KARP1-binding protein)	CEP170 FAM68A KAB KIAA0470	QGERRRRTLPQLPNE	1.76822	1.82653	Up	1.747	2.04082	0.80488	1.02915	1.76822	1.82653	0.822297	0.869106	1440000	2100000	2520000	1030000	3960000	3130000	6.5977	6.49554	67781	101150
Q5SW79	1	Centrosomal protein of 170 kDa OS=Homo sapiens GN=CEP170 PE=1 SV=1 - [CE170_HUMAN]	Q5SW79	S1198	Centrosomal protein of 170 kDa (Cep170) (KARP-1-binding protein) (KARP1-binding protein)	CEP170 FAM68A KAB KIAA0470	LVPSDKFSPRIRANS	1.70052	1.58324	Down	0.581	0.705716	-0.78339	-0.50284	0.588057	0.631616	-0.765973	-0.66288	13200000	28500000	7670000	40500000	20870000	69000000	7.31952	7.83885	78781	54746	Other/PLK	PLK1
O43159	1	Cerebral protein 1 OS=Homo sapiens GN=KIAA0409 PE=1 SV=2 - [HUCE1_HUMAN]	O43159	S104	Ribosomal RNA-processing protein 8 (EC 2.1.1.-) (Cerebral protein 1) (Nucleomethylin)	RRP8 KIAA0409 NML hucep-1	QKQGPPCSDSEEEVE	2.13853	1.55419	Down	0.462	0.718907	-1.11404	-0.476122	0.467611	0.643422	-1.09662	-0.636163	2950000	7520000	1360000	10500000	4310000	18020000	6.63448	7.25575	72931	31320
O43159	1	Cerebral protein 1 OS=Homo sapiens GN=KIAA0409 PE=1 SV=2 - [HUCE1_HUMAN]	O43159	S106	Ribosomal RNA-processing protein 8 (EC 2.1.1.-) (Cerebral protein 1) (Nucleomethylin)	RRP8 KIAA0409 NML hucep-1	QGPPCSDSEEEVERK	2.13853	1.55419	Down	0.462	0.718907	-1.11404	-0.476122	0.467611	0.643422	-1.09662	-0.636163	2950000	7520000	1360000	10500000	4310000	18020000	6.63448	7.25575	72931	31320
Q14432	1	cGMP-inhibited 3',5'-cyclic phosphodiesterase A OS=Homo sapiens GN=PDE3A PE=1 SV=3 - [PDE3A_HUMAN]	Q14432	S312	cGMP-inhibited 3',5'-cyclic phosphodiesterase A (EC 3.1.4.17) (Cyclic GMP-inhibited phosphodiesterase A) (CGI-PDE A)	PDE3A	SKSHRRTSLPCIPRE	1.85425	1.63024	Up	1.832	1.82149	0.87342	0.865122	1.85425	1.63024	0.890837	0.705082	28100000	66500000	51500000	36500000	79600000	103000000	7.90091	8.01284	40793	60905	AGC/PKA	PKACa, PKACg, PRKX, PRKY
Q14432	1	cGMP-inhibited 3',5'-cyclic phosphodiesterase A OS=Homo sapiens GN=PDE3A PE=1 SV=3 - [PDE3A_HUMAN]	Q14432	T311	cGMP-inhibited 3',5'-cyclic phosphodiesterase A (EC 3.1.4.17) (Cyclic GMP-inhibited phosphodiesterase A) (CGI-PDE A)	PDE3A	SSKSHRRTSLPCIPR	1.7247	1.67917	Up	1.704	1.87617	0.768925	0.907793	1.7247	1.67917	0.786342	0.747752	26500000	79000000	45200000	42100000	71700000	121100000	7.85552	8.08314	82539	60695
O00501	1	Claudin-5 OS=Homo sapiens GN=CLDN5 PE=1 SV=1 - [CLD5_HUMAN]	O00501	T207	Claudin-5 (Transmembrane protein deleted in VCFS) (TMDVCF)	CLDN5 AWAL TMVCF	YSAPRRPTATGDYDK	1.72874	1.91239	Up	1.708	2.13675	0.772308	1.09542	1.72874	1.91239	0.789725	0.935379	56100000	86000000	95900000	40300000	152000000	126300000	8.18184	8.1014	49546	77611
Q7Z460	1	CLIP-associating protein 1 OS=Homo sapiens GN=CLASP1 PE=1 SV=1 - [CLAP1_HUMAN]	Q7Z460	S1091	CLIP-associating protein 1 (Cytoplasmic linker-associated protein 1) (Multiple asters homolog 1) (Protein Orbit homolog 1) (hOrbit1)	CLASP1 KIAA0622 MAST1	SSNTSVGSPSNTIGR	1.82963	2.30056	Down	0.54	0.485673	-0.888969	-1.04194	0.546559	0.434677	-0.871552	-1.20198	632000000	69600000	341000000	143000000	973000000	212600000	8.98811	8.32756	3486	22397	CMGC/CDK/CDC2	CDC2
Q99627	1	COP9 signalosome complex subunit 8 OS=Homo sapiens GN=COPS8 PE=1 SV=1 - [CSN8_HUMAN]	Q99627	S175	COP9 signalosome complex subunit 8 (SGN8) (Signalosome subunit 8) (COP9 homolog) (hCOP9) (JAB1-containing signalosome subunit 8)	COPS8 CSN8	VAGALDVSFNKFIPL	1.98279	1.55923	Up	1.959	1.74216	0.970117	0.800877	1.98279	1.55923	0.987534	0.640837	1730000	1660000	3380000	953000	5110000	2613000	6.70842	6.41714	40960	160369
Q53SF7	1	Cordon-bleu protein-like 1 OS=Homo sapiens GN=COBLL1 PE=1 SV=2 - [COBL1_HUMAN]	Q53SF7	S394	Cordon-bleu protein-like 1	COBLL1 KIAA0977	SMSAGNSSLRRTKRK	2.26087	1.91397	Down	0.437	0.583771	-1.19429	-0.776525	0.442308	0.522475	-1.17688	-0.936566	18900000	16700000	8250000	28600000	27150000	45300000	7.43377	7.6561	36551	54614
Q13619	1	Cullin-4A OS=Homo sapiens GN=CUL4A PE=1 SV=3 - [CUL4A_HUMAN]	Q13619	S10	Cullin-4A (CUL-4A)	CUL4A	DEAPRKGSFSALVGR	1.61437	1.54844	Up	1.595	1.7301	0.673556	0.790859	1.61437	1.54844	0.690973	0.630818	19600000	40700000	31200000	23500000	50800000	64200000	7.70586	7.80754	40870	60990	CAMK/CAMKL/CHK1	CHK1
Q9Y6G9	1	Cytoplasmic dynein 1 light intermediate chain 1 OS=Homo sapiens GN=DYNC1LI1 PE=1 SV=3 - [DC1L1_HUMAN]	Q9Y6G9	S421	Cytoplasmic dynein 1 light intermediate chain 1 (LIC1) (Dynein light chain A) (DLC-A) (Dynein light intermediate chain 1, cytosolic)	DYNC1LI1 DNCLI1	SSNVASVSPIPAGSK	1.89272	1.73631	Down	0.522	0.643501	-0.937878	-0.635987	0.52834	0.575933	-0.920461	-0.796027	29800000	29200000	15500000	45300000	45300000	74500000	7.6561	7.87216	4617	27232
O43237	1	Cytoplasmic dynein 1 light intermediate chain 2 OS=Homo sapiens GN=DYNC1LI2 PE=1 SV=1 - [DC1L2_HUMAN]	O43237	S391	Cytoplasmic dynein 1 light intermediate chain 2 (Dynein light intermediate chain 2, cytosolic) (LIC-2) (LIC53/55)	DYNC1LI2 DNCLI2 LIC2	PARGPSGSPRTQGRG	1.62768	1.8514	Down	0.607	0.6035	-0.720232	-0.728574	0.614372	0.540133	-0.702815	-0.888614	61100000	14200000	37100000	23500000	98200000	37700000	7.99211	7.57634	39030	143380
Q14008	1	Cytoskeleton-associated protein 5 OS=Homo sapiens GN=CKAP5 PE=1 SV=2 - [CKAP5_HUMAN]	Q14008	T569	Cytoskeleton-associated protein 5 (Colonic and hepatic tumor overexpressed gene protein) (Ch-TOG)	CKAP5 KIAA0097	APGGAGNTGTKNKKG	3.03067	2.87821	Down	0.326	0.388199	-1.61706	-1.36513	0.32996	0.347438	-1.59964	-1.52517	20700000	7930000	6760000	20400000	27460000	28330000	7.4387	7.45225	39072	158700
Q5VZ89	1	DENN domain-containing protein 4C OS=Homo sapiens GN=DENND4C PE=1 SV=2 - [DEN4C_HUMAN]	Q5VZ89	S1089	DENN domain-containing protein 4C	DENND4C C9orf55 C9orf55B	THKERSTSLSALVRS	1.583	1.54045	Up	1.564	1.72117	0.645241	0.78339	1.583	1.54045	0.662658	0.62335	21600000	34900000	33700000	20300000	55300000	55200000	7.74273	7.74194	5594	28680
Q96JH7	1	Deubiquitinating protein VCIP135 OS=Homo sapiens GN=VCPIP1 PE=1 SV=2 - [VCIP1_HUMAN]	Q96JH7	S768	Deubiquitinating protein VCIP135 (EC 3.4.22.-) (Valosin-containing protein p97/p47 complex-interacting protein 1) (Valosin-containing protein p97/p47 complex-interacting protein p135) (VCP/p47 complex-interacting 135-kDa protein)	VCPIP1 KIAA1850 VCIP135	TPTKAPYSPTTSKEK	1.90734	1.6	Down	0.518	0.698324	-0.948976	-0.518031	0.524291	0.625	-0.931559	-0.678072	14100000	8430000	7320000	12100000	21420000	20530000	7.33082	7.31239	30295	41002
Q9P265	1	Disco-interacting protein 2 homolog B OS=Homo sapiens GN=DIP2B PE=1 SV=3 - [DIP2B_HUMAN]	Q9P265	S203	Disco-interacting protein 2 homolog B (DIP2 homolog B)	DIP2B KIAA1463	EVKGTSGSLADVFAN	1.87121	1.95531	Down	0.528	0.571429	-0.92139	-0.807355	0.534413	0.511429	-0.903973	-0.967395	7840000	7570000	4140000	13300000	11980000	20870000	7.07846	7.31952	107047	29349
Q9P265;Q14689	2	Disco-interacting protein 2 homolog B OS=Homo sapiens GN=DIP2B PE=1 SV=3 - [DIP2B_HUMAN]|Disco-interacting protein 2 homolog A OS=Homo sapiens GN=DIP2A PE=2 SV=2 - [DIP2A_HUMAN]	Q9P265	T283	Disco-interacting protein 2 homolog B (DIP2 homolog B)	DIP2B KIAA1463	KIQQLLNTLKRPKRP	3.64576	3.28827	Down	0.271	0.339789	-1.88364	-1.55729	0.274291	0.304111	-1.86622	-1.71733	3400000	9530000	923000	28000000	4323000	37530000	6.63579	7.57438	71350	118132			Q14689	T279	Disco-interacting protein 2 homolog A (DIP2 homolog A)	DIP2A C21orf106 DIP2 KIAA0184
Q9Y2H0	1	Disks large-associated protein 4 OS=Homo sapiens GN=DLGAP4 PE=1 SV=3 - [DLGP4_HUMAN]	Q9Y2H0	S973	Disks large-associated protein 4 (DAP-4) (PSD-95/SAP90-binding protein 4) (SAP90/PSD-95-associated protein 4) (SAPAP-4)	DLGAP4 DAP4 KIAA0964 SAPAP4	AASVRQNSATESADS	1.51417	2.55714	Up	1.496	2.85714	0.58111	1.51457	1.51417	2.55714	0.598527	1.35453	4400000	6690000	6590000	2340000	10990000	9030000	7.041	6.95569	102849	106535
Q8TDJ6	1	DmX-like protein 2 OS=Homo sapiens GN=DMXL2 PE=1 SV=1 - [DMXL2_HUMAN]	Q8TDJ6	S1400	DmX-like protein 2 (Rabconnectin-3)	DMXL2 KIAA0856	RHLSRTISVSGSTAK	4.20547	1.98009	Up	4.155	2.21239	2.05485	1.14561	4.20547	1.98009	2.07227	0.985565	5280000	42800000	21900000	19400000	27180000	62200000	7.43425	7.79379	3473	113598
Q9UJU6	1	Drebrin-like protein OS=Homo sapiens GN=DBNL PE=1 SV=1 - [DBNL_HUMAN]	Q9UJU6	S275	Drebrin-like protein (Cervical SH3P7) (Cervical mucin-associated protein) (Drebrin-F) (HPK1-interacting protein of 55 kDa) (HIP-55) (SH3 domain-containing protein 7)	DBNL CMAP SH3P7 PP5423	MSTTSISSPQPGKLR	2.34123	2.80559	Down	0.422	0.398248	-1.24469	-1.32826	0.427126	0.356432	-1.22727	-1.4883	377000000	150000000	159000000	377000000	536000000	527000000	8.72916	8.72181	3076	112644	CMGC/CDK	CDK4
Q9H9R9	1	Dysbindin domain-containing protein 1 OS=Homo sapiens GN=DBNDD1 PE=2 SV=1 - [DBND1_HUMAN]	Q9H9R9	S119	Dysbindin domain-containing protein 1	DBNDD1	PRAGYLRSPSWTRTR	1.74558	1.96313	Down	0.566	0.569152	-0.821126	-0.813114	0.572874	0.509391	-0.803709	-0.973155	6470000	566000	3660000	994000	10130000	1560000	7.00561	6.19312	41056	145614
Q8NDI1	1	EH domain-binding protein 1 OS=Homo sapiens GN=EHBP1 PE=1 SV=2 - [EHBP1_HUMAN]	Q8NDI1	S171	EH domain-binding protein 1	EHBP1 KIAA0903 NACSIN	ATDEDMQSLASLMSM	1.68826	1.71456	Up	1.668	1.91571	0.738119	0.937878	1.68826	1.71456	0.755536	0.777838	2610000	1000000	4350000	522000	6960000	1522000	6.84261	6.18241	20826	96924	Other/IKK	IKKa
Q8NDI1	1	EH domain-binding protein 1 OS=Homo sapiens GN=EHBP1 PE=1 SV=2 - [EHBP1_HUMAN]	Q8NDI1	S174	EH domain-binding protein 1	EHBP1 KIAA0903 NACSIN	EDMQSLASLMSMKQA	1.68826	1.71456	Up	1.668	1.91571	0.738119	0.937878	1.68826	1.71456	0.755536	0.777838	2610000	1000000	4350000	522000	6960000	1522000	6.84261	6.18241	20826	96924
O00418	1	Elongation factor 2 kinase OS=Homo sapiens GN=EEF2K PE=1 SV=1 - [EF2K_HUMAN]	O00418	T348	Eukaryotic elongation factor 2 kinase (eEF-2 kinase) (eEF-2K) (EC 2.7.11.20) (Calcium/calmodulin-dependent eukaryotic elongation factor 2 kinase)	EEF2K	KLLQSAKTILRGTEE	2.04132	2.05587	Down	0.484	0.543478	-1.04692	-0.879706	0.489879	0.486413	-1.0295	-1.03975	15500000	50000000	7490000	91900000	22990000	141900000	7.36154	8.15198	36826	51828
Q99961	1	Endophilin-A2 OS=Homo sapiens GN=SH3GL1 PE=1 SV=1 - [SH3G1_HUMAN]	Q99961	S288	Endophilin-A2 (EEN fusion partner of MLL) (Endophilin-2) (Extra eleven-nineteen leukemia fusion gene protein) (EEN) (SH3 domain protein 2B) (SH3 domain-containing GRB2-like protein 1)	SH3GL1 CNSA1 SH3D2B	PKIAASSSFRSSDKP	1.75801	1.90056	Down	0.562	0.587889	-0.831358	-0.766383	0.568826	0.526161	-0.813941	-0.926424	39600000	21700000	22300000	36800000	61900000	58500000	7.79169	7.76716	47929	72980
Q9Y6I3	1	Epsin-1 OS=Homo sapiens GN=EPN1 PE=1 SV=1 - [EPN1_HUMAN]	Q9Y6I3	T435	Epsin-1 (EH domain-binding mitotic phosphoprotein) (EPS-15-interacting protein 1)	EPN1	GSPPPAATPTPTPPT	4.51142	2.60894	Down	0.219	0.428266	-2.191	-1.22342	0.22166	0.383298	-2.17358	-1.38346	1260000	982000	276000	2290000	1536000	3272000	6.18639	6.51481	109117	98979	CMGC/CDK/CDC2	CDC2
Q9Y6I3	1	Epsin-1 OS=Homo sapiens GN=EPN1 PE=1 SV=1 - [EPN1_HUMAN]	Q9Y6I3	T439	Epsin-1 (EH domain-binding mitotic phosphoprotein) (EPS-15-interacting protein 1)	EPN1	PAATPTPTPPTRKTP	4.51142	2.60894	Down	0.219	0.428266	-2.191	-1.22342	0.22166	0.383298	-2.17358	-1.38346	1260000	982000	276000	2290000	1536000	3272000	6.18639	6.51481	109117	98979	CMGC/CDK/CDC2	CDC2
Q5T1M5	1	FK506-binding protein 15 OS=Homo sapiens GN=FKBP15 PE=1 SV=2 - [FKB15_HUMAN]	Q5T1M5	S346	FK506-binding protein 15 (FKBP-15) (133 kDa FK506-binding protein) (133 kDa FKBP) (FKBP-133) (WASP and FKBP-like) (WAFL)	FKBP15 KIAA0674	ALRTKSNSLSEQLAI	2.24393	1.55382	Up	2.217	1.73611	1.14861	0.795859	2.24393	1.55382	1.16603	0.635819	10500000	38100000	23200000	22000000	33700000	60100000	7.52763	7.77887	68116	15355
Q6ZNL6	1	FYVE, RhoGEF and PH domain-containing protein 5 OS=Homo sapiens GN=FGD5 PE=2 SV=2 - [FGD5_HUMAN]	Q6ZNL6	S720	FYVE, RhoGEF and PH domain-containing protein 5 (Zinc finger FYVE domain-containing protein 23)	FGD5 ZFYVE23	LRASESPSSLIFYRD	3.0875	2.22458	Down	0.32	0.50226	-1.64386	-0.993493	0.323887	0.449523	-1.62644	-1.15353	9770000	10500000	3120000	20800000	12890000	31300000	7.11025	7.49554	49262	146440
Q6ZNL6	1	FYVE, RhoGEF and PH domain-containing protein 5 OS=Homo sapiens GN=FGD5 PE=2 SV=2 - [FGD5_HUMAN]	Q6ZNL6	S744	FYVE, RhoGEF and PH domain-containing protein 5 (Zinc finger FYVE domain-containing protein 23)	FGD5 ZFYVE23	RTVSRVESFEDRSRP	1.5808	1.6581	Down	0.625	0.673854	-0.678072	-0.569491	0.632591	0.6031	-0.660655	-0.729532	321000000	104000000	201000000	155000000	522000000	259000000	8.71767	8.4133	40164	60253
Q4V328	1	GRIP1-associated protein 1 OS=Homo sapiens GN=GRIPAP1 PE=1 SV=1 - [GRAP1_HUMAN]	Q4V328	S666	GRIP1-associated protein 1 (GRASP-1)	GRIPAP1 KIAA1167	TQTGDSSSISSFSYR	1.55836	1.54078	Down	0.634	0.725163	-0.657445	-0.463622	0.6417	0.649021	-0.640028	-0.623663	25700000	16500000	16300000	22800000	42000000	39300000	7.62325	7.59439	105682	27857
O14558	1	Heat shock protein beta-6 OS=Homo sapiens GN=HSPB6 PE=1 SV=2 - [HSPB6_HUMAN]	O14558	S16	Heat shock protein beta-6 (HspB6) (Heat shock 20 kDa-like protein p20)	HSPB6	PSWLRRASAPLPGLS	1.53036	1.77932	Up	1.512	1.98807	0.596458	0.99137	1.53036	1.77932	0.613875	0.831329	4520000	12400000	6830000	6250000	11350000	18650000	7.055	7.27068	40839	60941
Q9H910	1	Hematological and neurological expressed 1-like protein OS=Homo sapiens GN=HN1L PE=1 SV=1 - [HN1L_HUMAN]	Q9H910	S132	Hematological and neurological expressed 1-like protein (HN1-like protein)	HN1L C16orf34 L11	SDLKAARSIPAGAEP	1.84818	1.94143	Up	1.826	2.1692	0.868687	1.11716	1.84818	1.94143	0.886104	0.957121	1750000	3870000	3190000	1780000	4940000	5650000	6.69373	6.75205	66522	99870
Q9H910	1	Hematological and neurological expressed 1-like protein OS=Homo sapiens GN=HN1L PE=1 SV=1 - [HN1L_HUMAN]	Q9H910	S97	Hematological and neurological expressed 1-like protein (HN1-like protein)	HN1L C16orf34 L11	KTSDIFGSPVTATSR	1.58333	1.66369	Down	0.624	0.671592	-0.680382	-0.574344	0.631579	0.601075	-0.662965	-0.734384	315000000	167000000	197000000	249000000	512000000	416000000	8.70927	8.61909	5619	28735
P52272	1	Heterogeneous nuclear ribonucleoprotein M OS=Homo sapiens GN=HNRNPM PE=1 SV=3 - [HNRPM_HUMAN]	P52272	S528	Heterogeneous nuclear ribonucleoprotein M (hnRNP M)	HNRNPM HNRPM NAGR1	AIERMGLSMERMVPA	2.03441	1.77228	Up	2.01	1.9802	1.0072	0.985645	2.03441	1.77228	1.02461	0.825604	23700000	320000000	47500000	161000000	71200000	481000000	7.85248	8.68215	70737	23640
P52272	1	Heterogeneous nuclear ribonucleoprotein M OS=Homo sapiens GN=HNRNPM PE=1 SV=3 - [HNRPM_HUMAN]	P52272	S633	Heterogeneous nuclear ribonucleoprotein M (hnRNP M)	HNRNPM HNRPM NAGR1	ERGNFGGSFAGSFGG	1.75	1.60107	Up	1.729	1.78891	0.789938	0.83908	1.75	1.60107	0.807355	0.679039	58100000	121000000	100000000	67800000	158100000	188800000	8.19893	8.276	38240	56052	STE/STE11	MAP3K1
P52272	1	Heterogeneous nuclear ribonucleoprotein M OS=Homo sapiens GN=HNRNPM PE=1 SV=3 - [HNRPM_HUMAN]	P52272	S637	Heterogeneous nuclear ribonucleoprotein M (hnRNP M)	HNRNPM HNRPM NAGR1	FGGSFAGSFGGAGGH	1.82591	1.7278	Up	1.804	1.9305	0.851199	0.948976	1.82591	1.7278	0.868616	0.788936	31900000	67600000	57500000	35000000	89400000	102600000	7.95134	8.01115	80217	55955	STE/STE11	MAP3K1
P22626	1	Heterogeneous nuclear ribonucleoproteins A2/B1 OS=Homo sapiens GN=HNRNPA2B1 PE=1 SV=2 - [ROA2_HUMAN]	P22626	S212	Heterogeneous nuclear ribonucleoproteins A2/B1 (hnRNP A2/B1)	HNRNPA2B1 HNRPA2B1	GNFGFGDSRGGGGNF	1.94737	2.04805	Up	1.924	2.28833	0.944109	1.19429	1.94737	2.04805	0.961526	1.03425	35400000	5400000	68000000	2360000	103400000	7760000	8.01452	6.88986	38317	110231
P35367	1	Histamine H1 receptor OS=Homo sapiens GN=HRH1 PE=2 SV=1 - [HRH1_HUMAN]	P35367	S380	Histamine H1 receptor (H1R) (HH1R)	HRH1	KGKLRSGSNTGLDYI	3.40992	2.98333	Up	3.369	3.33333	1.75232	1.73697	3.40992	2.98333	1.76974	1.57693	875000	6330000	2950000	1900000	3825000	8230000	6.58263	6.9154	41025	117466	CAMK/PKD	PKD1
O60381	1	HMG box-containing protein 1 OS=Homo sapiens GN=HBP1 PE=1 SV=2 - [HBP1_HUMAN]	O60381	S380	HMG box-containing protein 1 (HMG box transcription factor 1) (High mobility group box transcription factor 1)	HBP1	MARQRRASLSCGGPG	1.60425	1.50927	Up	1.585	1.68634	0.664483	0.753896	1.60425	1.50927	0.6819	0.593856	6830000	7480000	10800000	4440000	17630000	11920000	7.24625	7.07628	40158	60469
P39880	1	Homeobox protein cut-like 1 OS=Homo sapiens GN=CUX1 PE=1 SV=2 - [CUX1_HUMAN]	P39880	S1270	Homeobox protein cut-like 1 (CCAAT displacement protein) (CDP) (Homeobox protein cux-1)	CUX1 CUTL1	YQQKPYPSPKTIEDL	1.78846	2.85942	Up	1.767	3.19489	0.821302	1.67577	1.78846	2.85942	0.838719	1.51573	3850000	3660000	6800000	1150000	10650000	4810000	7.02735	6.68215	52491	83505	TKL/IRAK	IRAK2
Q9NSC5	1	Homer protein homolog 3 OS=Homo sapiens GN=HOMER3 PE=1 SV=2 - [HOME3_HUMAN]	Q9NSC5	S159	Homer protein homolog 3 (Homer-3)	HOMER3	EKLFRSQSADAPGPT	1.91296	1.65129	Up	1.89	1.84502	0.918386	0.883635	1.91296	1.65129	0.935803	0.723595	11200000	24700000	21100000	13400000	32300000	38100000	7.5092	7.58092	7202	112248	CAMK/CAMK2	CaMK2g
O75146	1	Huntingtin-interacting protein 1-related protein OS=Homo sapiens GN=HIP1R PE=1 SV=2 - [HIP1R_HUMAN]	O75146	S1045	Huntingtin-interacting protein 1-related protein (HIP1-related protein) (Huntingtin-interacting protein 12) (HIP-12)	HIP1R HIP12 KIAA0655	PPLAQKPSVAPRQDH	2.44838	2.36772	Up	2.419	2.6455	1.27441	1.40354	2.44838	2.36772	1.29183	1.2435	8560000	30900000	20700000	11700000	29260000	42600000	7.46627	7.62941	47584	165332
Q15111	1	Inactive phospholipase C-like protein 1 OS=Homo sapiens GN=PLCL1 PE=1 SV=2 - [PLCL1_HUMAN]	Q15111	S77	Inactive phospholipase C-like protein 1 (PLC-L1) (Phospholipase C-deleted in lung carcinoma) (Phospholipase C-related but catalytically inactive protein) (PRIP)	PLCL1	RATPRRSSIIKDPSN	1.52024	1.56469	Up	1.502	1.74825	0.586885	0.805913	1.52024	1.56469	0.604302	0.645873	20600000	12600000	30900000	7210000	51500000	19810000	7.71181	7.29688	89060	77993
Q14573	1	Inositol 1,4,5-trisphosphate receptor type 3 OS=Homo sapiens GN=ITPR3 PE=1 SV=1 - [ITPR3_HUMAN]	Q14573	S1832	Inositol 1,4,5-trisphosphate receptor type 3 (IP3 receptor isoform 3) (IP3R 3) (InsP3R3) (Type 3 inositol 1,4,5-trisphosphate receptor) (Type 3 InsP3 receptor)	ITPR3	TTKGRVASFSIPGSS	1.5081	1.62432	Up	1.49	1.81488	0.575312	0.859876	1.5081	1.62432	0.592729	0.699835	96900000	88600000	144000000	48900000	240900000	137500000	8.38184	8.1383	5544	28588	AGC/AKT	AKT1
P16144	1	Integrin beta-4 OS=Homo sapiens GN=ITGB4 PE=1 SV=4 - [ITB4_HUMAN]	P16144	S1069	Integrin beta-4 (GP150) (CD antigen CD104)	ITGB4	LELQEVDSLLRGRQV	1.61967	1.5419	Down	0.61	0.724638	-0.713119	-0.464668	0.617409	0.648551	-0.695702	-0.624709	1820000	15500000	1110000	21400000	2930000	36900000	6.46687	7.56703	108107	121146
P16144	1	Integrin beta-4 OS=Homo sapiens GN=ITGB4 PE=1 SV=4 - [ITB4_HUMAN]	P16144	S1457	Integrin beta-4 (GP150) (CD antigen CD104)	ITGB4	AFPGSTNSLHRMTTT	1.74867	2.04358	Down	0.565	0.546747	-0.823677	-0.871055	0.571862	0.489338	-0.80626	-1.0311	26500000	8370000	15000000	15300000	41500000	23670000	7.61805	7.3742	38742	55954
P16144	1	Integrin beta-4 OS=Homo sapiens GN=ITGB4 PE=1 SV=4 - [ITB4_HUMAN]	P16144	S1494	Integrin beta-4 (GP150) (CD antigen CD104)	ITGB4	TLTRDYNSLTRSEHS	1.59871	2.00559	Down	0.618	0.557103	-0.694321	-0.843984	0.625506	0.498607	-0.676904	-1.00402	4310000	7770000	2660000	13900000	6970000	21670000	6.84323	7.33586	8985	109015	AGC/PKC	PKCa, PKCb, PKCd, PKCg
P18084	1	Integrin beta-5 OS=Homo sapiens GN=ITGB5 PE=2 SV=1 - [ITB5_HUMAN]	P18084	S770	Integrin beta-5	ITGB5	RARYEMASNPLYRKP	2.31382	3.05363	Down	0.427	0.365898	-1.22769	-1.45049	0.432186	0.327479	-1.21027	-1.61053	25700000	9790000	11000000	26800000	36700000	36590000	7.56467	7.56336	43235	27626
Q27J81	1	Inverted formin-2 OS=Homo sapiens GN=INF2 PE=1 SV=2 - [INF2_HUMAN]	Q27J81	T1199	Inverted formin-2 (HBEBP2-binding protein C)	INF2 C14orf151 C14orf173	SFSEDAVTDSSGSGT	2.36364	2.27598	Down	0.418	0.490918	-1.25843	-1.02645	0.423077	0.439372	-1.24101	-1.18649	61100000	8540000	25500000	17400000	86600000	25940000	7.93752	7.41397	5105	23898
Q27J81	1	Inverted formin-2 OS=Homo sapiens GN=INF2 PE=1 SV=2 - [INF2_HUMAN]	Q27J81	T1206	Inverted formin-2 (HBEBP2-binding protein C)	INF2 C14orf151 C14orf173	TDSSGSGTLPRARGR	2.53333	1.81006	Down	0.39	0.617284	-1.35845	-0.695994	0.394737	0.552469	-1.34104	-0.856034	41700000	5580000	16300000	9040000	58000000	14620000	7.76343	7.16495	5352	24104
Q8IVT5	1	Kinase suppressor of Ras 1 OS=Homo sapiens GN=KSR1 PE=1 SV=2 - [KSR1_HUMAN]	Q8IVT5	T272	Kinase suppressor of Ras 1	KSR1 KSR	SFITPPTTPQLRRHT	2.55297	3.46034	Down	0.387	0.322893	-1.36959	-1.63087	0.3917	0.288989	-1.35218	-1.79091	20800000	863000	8040000	2670000	28840000	3533000	7.46	6.54814	44196	37826	STE/STE7	MAP2K1, MAP2K2
Q9NQT8	1	Kinesin-like protein KIF13B OS=Homo sapiens GN=KIF13B PE=1 SV=1 - [KI13B_HUMAN]	Q9NQT8	S1382	Kinesin-like protein KIF13B (Kinesin-like protein GAKIN)	KIF13B GAKIN KIAA0639	LSRRSISSPNVNRLS	2.19069	6.24916	Down	0.451	0.178795	-1.1488	-2.48362	0.456478	0.160021	-1.13138	-2.64366	27000000	433000	12200000	2420000	39200000	2853000	7.59329	6.4553	3174	97801
Q9NQT8	1	Kinesin-like protein KIF13B OS=Homo sapiens GN=KIF13B PE=1 SV=1 - [KI13B_HUMAN]	Q9NQT8	S1644	Kinesin-like protein KIF13B (Kinesin-like protein GAKIN)	KIF13B GAKIN KIAA0639	LEAPAPGSPFRVRRV	1.96421	2.07486	Down	0.503	0.538503	-0.99137	-0.892974	0.509109	0.48196	-0.973953	-1.05301	214000000	82800000	108000000	154000000	322000000	236800000	8.50786	8.37438	41133	61256
Q14678	1	KN motif and ankyrin repeat domain-containing protein 1 OS=Homo sapiens GN=KANK1 PE=2 SV=3 - [KANK1_HUMAN]	Q14678	S186	KN motif and ankyrin repeat domain-containing protein 1 (Ankyrin repeat domain-containing protein 15) (Kidney ankyrin repeat-containing protein)	KANK1 ANKRD15 KANK KIAA0172	FRRPRLASFGGMGTT	1.65688	1.75835	Up	1.637	1.96464	0.711054	0.974262	1.65688	1.75835	0.728471	0.814222	13600000	48200000	22300000	24500000	35900000	72700000	7.55509	7.86153	76782	125830
Q63ZY3	1	KN motif and ankyrin repeat domain-containing protein 2 OS=Homo sapiens GN=KANK2 PE=1 SV=1 - [KANK2_HUMAN]	Q63ZY3	S540	KN motif and ankyrin repeat domain-containing protein 2 (Ankyrin repeat domain-containing protein 25) (Matrix-remodeling-associated protein 3) (SRC-1-interacting protein) (SRC1-interacting protein)	KANK2 ANKRD25 KIAA1518 MXRA3 SIP	EPRERVPSVAEAPQL	1.71053	1.77932	Up	1.69	1.98807	0.757023	0.99137	1.71053	1.77932	0.77444	0.831329	11200000	17300000	19000000	8670000	30200000	25970000	7.48001	7.41447	43631	66542
Q8NC56	1	LEM domain-containing protein 2 OS=Homo sapiens GN=LEMD2 PE=1 SV=1 - [LEMD2_HUMAN]	Q8NC56	S138	LEM domain-containing protein 2 (hLEM2)	LEMD2	RRASVRGSSEEDEDA	1.77379	1.90615	Down	0.557	0.586166	-0.844251	-0.770618	0.563765	0.524619	-0.826834	-0.930658	4990000	1640000	2780000	2800000	7770000	4440000	6.89042	6.64738	47164	143965
Q86V48	1	Leucine zipper protein 1 OS=Homo sapiens GN=LUZP1 PE=1 SV=2 - [LUZP1_HUMAN]	Q86V48	S957	Leucine zipper protein 1	LUZP1	NAYTQRSSTDFSELE	1.81174	1.79	Up	1.79	2	0.83996	1	1.81174	1.79	0.857377	0.83996	62900000	38400000	113000000	19200000	175900000	57600000	8.24527	7.76042	5254	117694
Q86V48	1	Leucine zipper protein 1 OS=Homo sapiens GN=LUZP1 PE=1 SV=2 - [LUZP1_HUMAN]	Q86V48	S423	Leucine zipper protein 1	LUZP1	LSNRQVSSPSFTNRR	1.89272	2.73966	Down	0.522	0.40783	-0.937878	-1.29396	0.52834	0.365008	-0.920461	-1.454	14000000	5610000	7300000	13800000	21300000	19410000	7.32838	7.28803	8942	22704
Q14847	1	LIM and SH3 domain protein 1 OS=Homo sapiens GN=LASP1 PE=1 SV=2 - [LASP1_HUMAN]	Q14847	T104	LIM and SH3 domain protein 1 (LASP-1) (Metastatic lymph node gene 50 protein) (MLN 50)	LASP1 MLN50	GFSVVADTPELQRIK	2.30841	2.42905	Down	0.428	0.459982	-1.22432	-1.12035	0.433198	0.411684	-1.2069	-1.28039	955000000	336000000	409000000	731000000	1364000000	1067000000	9.13481	9.02816	5597	28721
P53671	1	LIM domain kinase 2 OS=Homo sapiens GN=LIMK2 PE=1 SV=1 - [LIMK2_HUMAN]	P53671	S289	LIM domain kinase 2 (LIMK-2) (EC 2.7.11.1)	LIMK2	RSLRRSNSISKSPGP	1.59098	1.73855	Down	0.621	0.642674	-0.687335	-0.637842	0.628543	0.575193	-0.669918	-0.797882	10000000	678000	6220000	1060000	16220000	1738000	7.21005	6.24005	85984	133280	AGC/DMPK/ROCK	ROCK1
Q8WWI1	1	LIM domain only protein 7 OS=Homo sapiens GN=LMO7 PE=1 SV=2 - [LMO7_HUMAN]	Q8WWI1	S1493	LIM domain only protein 7 (LMO-7) (F-box only protein 20) (LOMP)	LMO7 FBX20 FBXO20 KIAA0858	WIRQRSASVNKEPVS	1.63259	1.65129	Up	1.613	1.84502	0.689746	0.883635	1.63259	1.65129	0.707163	0.723595	30300000	89200000	48800000	48300000	79100000	137500000	7.89818	8.1383	34100	48569	AGC/AKT	AKT1
Q8WWI1	1	LIM domain only protein 7 OS=Homo sapiens GN=LMO7 PE=1 SV=2 - [LMO7_HUMAN]	Q8WWI1	S751	LIM domain only protein 7 (LMO-7) (F-box only protein 20) (LOMP)	LMO7 FBX20 FBXO20 KIAA0858	KWKDRRKSYTSDLQK	1.71356	2.11085	Up	1.693	2.35849	0.759582	1.23786	1.71356	2.11085	0.776999	1.07782	7180000	10600000	12200000	4480000	19380000	15080000	7.28735	7.1784	66537	99915	AGC/AKT	AKT1
Q13136	1	Liprin-alpha-1 OS=Homo sapiens GN=PPFIA1 PE=1 SV=1 - [LIPA1_HUMAN]	Q13136	S1172	Liprin-alpha-1 (LAR-interacting protein 1) (LIP-1) (Protein tyrosine phosphatase receptor type f polypeptide-interacting protein alpha-1) (PTPRF-interacting protein alpha-1)	PPFIA1 LIP1	RVTSSMSSPSMQPKK	1.84673	1.60112	Down	0.535	0.697837	-0.902389	-0.519039	0.541498	0.624564	-0.884972	-0.679079	10400000	15600000	5580000	22300000	15980000	37900000	7.20358	7.57864	7021	22938	CAMK	Trio
Q5SW96	1	Low density lipoprotein receptor adapter protein 1 OS=Homo sapiens GN=LDLRAP1 PE=1 SV=3 - [ARH_HUMAN]	Q5SW96	S14	Low density lipoprotein receptor adapter protein 1 (Autosomal recessive hypercholesterolemia protein)	LDLRAP1 ARH	AGRALIRSPSLAKQS	1.52	1.52849	Down	0.65	0.730994	-0.621488	-0.452068	0.657895	0.65424	-0.604071	-0.612109	17600000	43300000	11400000	59200000	29000000	102500000	7.4624	8.01072	40454	51435	CMGC/CDK	CDK4
Q3KQU3	1	MAP7 domain-containing protein 1 OS=Homo sapiens GN=MAP7D1 PE=1 SV=1 - [MA7D1_HUMAN]	Q3KQU3	S442	MAP7 domain-containing protein 1 (Arginine/proline-rich coiled-coil domain-containing protein 1) (Proline/arginine-rich coiled-coil domain-containing protein 1)	MAP7D1 KIAA1187 PARCC1 RPRC1 PP2464	RSLKKRQSLPASPRA	1.60628	1.98448	Up	1.587	2.21729	0.666302	1.1488	1.60628	1.98448	0.683719	0.98876	2220000	1990000	3530000	898000	5750000	2888000	6.75967	6.4606	54550	85582
Q3KQU3	1	MAP7 domain-containing protein 1 OS=Homo sapiens GN=MAP7D1 PE=1 SV=1 - [MA7D1_HUMAN]	Q3KQU3	S446	MAP7 domain-containing protein 1 (Arginine/proline-rich coiled-coil domain-containing protein 1) (Proline/arginine-rich coiled-coil domain-containing protein 1)	MAP7D1 KIAA1187 PARCC1 RPRC1 PP2464	KRQSLPASPRARLSA	1.52705	1.51844	Down	0.647	0.735835	-0.628162	-0.442545	0.654858	0.658572	-0.610745	-0.602586	121000000	59300000	78600000	80600000	199600000	139900000	8.30016	8.14582	3201	25959
Q15648	1	Mediator of RNA polymerase II transcription subunit 1 OS=Homo sapiens GN=MED1 PE=1 SV=4 - [MED1_HUMAN]	Q15648	T1057	Mediator of RNA polymerase II transcription subunit 1 (Activator-recruited cofactor 205 kDa component) (ARC205) (Mediator complex subunit 1) (Peroxisome proliferator-activated receptor-binding protein) (PBP) (PPAR-binding protein) (Thyroid hormone receptor-associated protein complex 220 kDa component) (Trap220) (Thyroid receptor-interacting protein 2) (TR-interacting protein 2) (TRIP-2) (Vitamin …	MED1 ARC205 CRSP1 CRSP200 DRIP205 DRIP230 PBP PPARBP PPARGBP RB18A TRAP220 TRIP2	QTPPGVATPPIPKIT	3.39519	1.5095	Down	0.291	0.740192	-1.78091	-0.434028	0.294534	0.662472	-1.76349	-0.594068	635000	2510000	185000	3400000	820000	5910000	5.91381	6.77159	21799	98103	CMGC/CDK/CDC2	CDK2
P78559	1	Microtubule-associated protein 1A OS=Homo sapiens GN=MAP1A PE=1 SV=5 - [MAP1A_HUMAN]	P78559	S2022	Microtubule-associated protein 1A (MAP-1A) (Proliferation-related protein p80) [Cleaved into: MAP1 light chain LC2]	MAP1A MAP1L	KELSSPISPKSLQSD	3.3266	4.58994	Down	0.297	0.243427	-1.75147	-2.03844	0.300607	0.217868	-1.73405	-2.19848	191000000	5780000	56700000	23700000	247700000	29480000	8.39393	7.46953	4537	23448	CMGC/CDK	CDK5
P27816	1	Microtubule-associated protein 4 OS=Homo sapiens GN=MAP4 PE=1 SV=2 - [MAP4_HUMAN]	P27816	S1000	Microtubule-associated protein 4 (MAP-4)	MAP4	QIVSKKVSYSHIQSK	1.7753	1.92473	Up	1.754	2.15054	0.810649	1.1047	1.7753	1.92473	0.828066	0.944657	5280000	13300000	9250000	6180000	14530000	19480000	7.16227	7.28959	47494	78042	CAMK/CAMKL	MARK1, MARK2, MARK3, MARK4
P27816	1	Microtubule-associated protein 4 OS=Homo sapiens GN=MAP4 PE=1 SV=2 - [MAP4_HUMAN]	P27816	T917	Microtubule-associated protein 4 (MAP-4)	MAP4	SAKPSSTTPRLSRLA	1.66892	1.97877	Down	0.592	0.564653	-0.756331	-0.824564	0.59919	0.505364	-0.738914	-0.984605	175000000	27700000	104000000	49200000	279000000	76900000	8.4456	7.88593	49587	89333	CMGC/CDK/CDC2	CDC2
O95819	1	Mitogen-activated protein kinase kinase kinase kinase 4 OS=Homo sapiens GN=MAP4K4 PE=1 SV=2 - [M4K4_HUMAN]	O95819	S800	Mitogen-activated protein kinase kinase kinase kinase 4 (EC 2.7.11.1) (HPK/GCK-like kinase HGK) (MAPK/ERK kinase kinase kinase 4) (MEK kinase kinase 4) (MEKKK 4) (Nck-interacting kinase)	MAP4K4 HGK KIAA0687 NIK	PEDTRAASSLNLSNG	3.74242	1.81341	Down	0.264	0.616143	-1.92139	-0.698663	0.267206	0.551448	-1.90397	-0.858703	57700000	19900000	15200000	32300000	72900000	52200000	7.86273	7.71767	4714	27467
O95819	1	Mitogen-activated protein kinase kinase kinase kinase 4 OS=Homo sapiens GN=MAP4K4 PE=1 SV=2 - [M4K4_HUMAN]	O95819	S842	Mitogen-activated protein kinase kinase kinase kinase 4 (EC 2.7.11.1) (HPK/GCK-like kinase HGK) (MAPK/ERK kinase kinase kinase 4) (MEK kinase kinase 4) (MEKKK 4) (Nck-interacting kinase)	MAP4K4 HGK KIAA0687 NIK	LIVRQTQSASSTLQK	2.49495	2.29162	Down	0.396	0.487567	-1.33643	-1.03633	0.40081	0.436373	-1.31901	-1.19637	58100000	52100000	23000000	107000000	81100000	159100000	7.90902	8.20167	103574	112437	STE/STE11	MAP3K1
Q9P2K5	1	Myelin expression factor 2 OS=Homo sapiens GN=MYEF2 PE=1 SV=2 - [MYEF2_HUMAN]	Q9P2K5	S431	Myelin expression factor 2 (MEF-2) (MyEF-2) (MST156)	MYEF2 KIAA1341	INRGFGDSFGRLGSA	2.1498	2.20443	Up	2.124	2.46305	1.08678	1.30045	2.1498	2.20443	1.1042	1.14041	45400000	27000000	96400000	11000000	141800000	38000000	8.15168	7.57978	4895	116920
Q13459	1	Myosin-IXb OS=Homo sapiens GN=MYO9B PE=1 SV=2 - [MYO9B_HUMAN]	Q13459	S1354	Unconventional myosin-IXb (Unconventional myosin-9b)	MYO9B MYR5	PTEERRTSFSTSDVS	1.71053	1.75147	Up	1.69	1.95695	0.757023	0.968605	1.71053	1.75147	0.77444	0.808564	12000000	26900000	20300000	13700000	32300000	40600000	7.5092	7.60853	39927	60026
Q13459	1	Myosin-IXb OS=Homo sapiens GN=MYO9B PE=1 SV=2 - [MYO9B_HUMAN]	Q13459	T1353	Unconventional myosin-IXb (Unconventional myosin-9b)	MYO9B MYR5	TPTEERRTSFSTSDV	1.68522	1.69829	Up	1.665	1.89753	0.735522	0.924125	1.68522	1.69829	0.752939	0.764085	79900000	108000000	133000000	57000000	212900000	165000000	8.32818	8.21748	81704	144257
Q92614	1	Myosin-XVIIIa OS=Homo sapiens GN=MYO18A PE=1 SV=3 - [MY18A_HUMAN]	Q92614	S52	Unconventional myosin-XVIIIa (Molecule associated with JAK3 N-terminus) (MAJN) (Myosin containing a PDZ domain)	MYO18A KIAA0216 MYSPDZ	FFNLNRSSKRESKTR	2.10661	1.75978	Down	0.469	0.634921	-1.09234	-0.655352	0.474696	0.568254	-1.07492	-0.815392	554000	742000	260000	1170000	814000	1912000	5.91062	6.28149	92855	84639
P29966	1	Myristoylated alanine-rich C-kinase substrate OS=Homo sapiens GN=MARCKS PE=1 SV=4 - [MARCS_HUMAN]	P29966	T143	Myristoylated alanine-rich C-kinase substrate (MARCKS) (Protein kinase C substrate, 80 kDa protein, light chain) (80K-L protein) (PKCSL)	MARCKS MACS PRKCSL	PKAEDGATPSPSNET	1.5808	1.82793	Down	0.625	0.611247	-0.678072	-0.710173	0.632591	0.547066	-0.660655	-0.870213	524000000	260000000	328000000	425000000	852000000	685000000	8.93044	8.83569	39089	158702	CMGC/GSK	GSK3A
Q09666	1	Neuroblast differentiation-associated protein AHNAK OS=Homo sapiens GN=AHNAK PE=1 SV=2 - [AHNK_HUMAN]	Q09666	S135	Neuroblast differentiation-associated protein AHNAK (Desmoyokin)	AHNAK PM227	KIKPRLKSEDGVEGD	1.52227	1.5247	Up	1.504	1.70358	0.588805	0.768568	1.52227	1.5247	0.606222	0.608527	1200000000	1410000000	1810000000	829000000	3010000000	2239000000	9.47857	9.35005	36588	51578	Other/CK2	CK2a2
Q09666	1	Neuroblast differentiation-associated protein AHNAK OS=Homo sapiens GN=AHNAK PE=1 SV=2 - [AHNK_HUMAN]	Q09666	T553	Neuroblast differentiation-associated protein AHNAK (Desmoyokin)	AHNAK PM227	PNLEGTLTGPRLGSP	5.51955	5.26257	Down	0.179	0.212314	-2.48197	-2.23573	0.181174	0.190021	-2.46455	-2.39577	750000	555000	134000	2610000	884000	3165000	5.94645	6.50037	83571	119830
Q09666	1	Neuroblast differentiation-associated protein AHNAK OS=Homo sapiens GN=AHNAK PE=1 SV=2 - [AHNK_HUMAN]	Q09666	T590	Neuroblast differentiation-associated protein AHNAK (Desmoyokin)	AHNAK PM227	VKGGVDVTLPRVEGK	2.71429	2.52961	Down	0.364	0.441696	-1.45799	-1.17887	0.368421	0.395318	-1.44057	-1.33891	421000	1090000	154000	2470000	575000	3560000	5.75967	6.55145	11561	117579
Q8NEY1	1	Neuron navigator 1 OS=Homo sapiens GN=NAV1 PE=1 SV=2 - [NAV1_HUMAN]	Q8NEY1	S648	Neuron navigator 1 (Pore membrane and/or filament-interacting-like protein 3) (Steerin-1) (Unc-53 homolog 1) (unc53H1)	NAV1 KIAA1151 KIAA1213 POMFIL3 STEERIN1	PVNGRKTSLDVSNSA	1.60628	1.68868	Up	1.587	1.88679	0.666302	0.915936	1.60628	1.68868	0.683719	0.755895	31200000	35700000	49400000	18900000	80600000	54600000	7.90634	7.73719	76505	55958
Q8NEY1	1	Neuron navigator 1 OS=Homo sapiens GN=NAV1 PE=1 SV=2 - [NAV1_HUMAN]	Q8NEY1	S490	Neuron navigator 1 (Pore membrane and/or filament-interacting-like protein 3) (Steerin-1) (Unc-53 homolog 1) (unc53H1)	NAV1 KIAA1151 KIAA1213 POMFIL3 STEERIN1	KLEYDSGSLKMEPGT	1.55591	2.75307	Down	0.635	0.405844	-0.655172	-1.301	0.642713	0.363231	-0.637754	-1.46104	14300000	3000000	9070000	7400000	23370000	10400000	7.36866	7.01703	87964	70972
Q5SYE7	1	NHS-like protein 1 OS=Homo sapiens GN=NHSL1 PE=1 SV=2 - [NHSL1_HUMAN]	Q5SYE7	S1089	NHS-like protein 1	NHSL1 C6orf63 KIAA1357	LRPVRKNSGAEAAQL	1.70344	2.09112	Up	1.683	2.33645	0.751035	1.22432	1.70344	2.09112	0.768452	1.06428	16100000	3340000	27100000	1430000	43200000	4770000	7.63548	6.67852	39544	158990
Q5SYE7	1	NHS-like protein 1 OS=Homo sapiens GN=NHSL1 PE=1 SV=2 - [NHSL1_HUMAN]	Q5SYE7	S198	NHS-like protein 1	NHSL1 C6orf63 KIAA1357	TQTNWTKSLPLPTPE	2.08879	2.13631	Down	0.473	0.523013	-1.08009	-0.935083	0.478745	0.468096	-1.06267	-1.09512	18800000	20500000	8860000	39100000	27660000	59600000	7.44185	7.77525	101935	19262
Q5HYW2	1	NHS-like protein 2 OS=Homo sapiens GN=NHSL2 PE=2 SV=1 - [NHSL2_HUMAN]	Q5HYW2	S192	NHS-like protein 2	NHSL2	HRRQRSKSISLRKAK	1.83198	1.78287	Up	1.81	1.99203	0.85599	0.994241	1.83198	1.78287	0.873407	0.8342	2390000	3220000	4320000	1620000	6710000	4840000	6.82672	6.68485	52492	83506
P29474	1	Nitric oxide synthase, endothelial OS=Homo sapiens GN=NOS3 PE=1 SV=3 - [NOS3_HUMAN]	P29474	S1177	Nitric oxide synthase, endothelial (EC 1.14.13.39) (Constitutive NOS) (cNOS) (EC-NOS) (Endothelial NOS) (eNOS) (NOS type III) (NOSIII)	NOS3	TSRIRTQSFSLQERQ	1.71559	1.58127	Up	1.695	1.76678	0.761285	0.821126	1.71559	1.58127	0.778702	0.661086	107000000	259000000	181000000	147000000	288000000	406000000	8.45939	8.60853	105323	27432	AGC/AKT	AKT1, AKT2, AKT3
P29474	1	Nitric oxide synthase, endothelial OS=Homo sapiens GN=NOS3 PE=1 SV=3 - [NOS3_HUMAN]	P29474	S615	Nitric oxide synthase, endothelial (EC 1.14.13.39) (Constitutive NOS) (cNOS) (EC-NOS) (Endothelial NOS) (eNOS) (NOS type III) (NOSIII)	NOS3	SYKIRFNSISCSDPL	1.84514	2.33681	Up	1.823	2.61097	0.866315	1.38458	1.84514	2.33681	0.883732	1.22454	7350000	9460000	13400000	3620000	20750000	13080000	7.31702	7.11661	41963	111487	TKL/STKR	BMPR1A, BMPR2, TGFbR1
P29474	1	Nitric oxide synthase, endothelial OS=Homo sapiens GN=NOS3 PE=1 SV=3 - [NOS3_HUMAN]	P29474	T1175	Nitric oxide synthase, endothelial (EC 1.14.13.39) (Constitutive NOS) (cNOS) (EC-NOS) (Endothelial NOS) (eNOS) (NOS type III) (NOSIII)	NOS3	EVTSRIRTQSFSLQE	1.68421	1.60394	Up	1.664	1.79211	0.734655	0.841663	1.68421	1.60394	0.752072	0.681623	84100000	176000000	140000000	98000000	224100000	274000000	8.35044	8.43775	70614	23513	CAMK/CAMKL/CHK1	CHK1
Q9NXR1	1	Nuclear distribution protein nudE homolog 1 OS=Homo sapiens GN=NDE1 PE=1 SV=2 - [NDE1_HUMAN]	Q9NXR1	S306	Nuclear distribution protein nudE homolog 1 (NudE)	NDE1 NUDE	DGGERRPSSTSVPLG	1.51417	2.06221	Up	1.496	2.30415	0.58111	1.20423	1.51417	2.06221	0.598527	1.04419	16200000	15900000	24300000	6880000	40500000	22780000	7.60746	7.35755	45230	68234	AGC/PKA	PKACa, PKACg
Q9NXR1	1	Nuclear distribution protein nudE homolog 1 OS=Homo sapiens GN=NDE1 PE=1 SV=2 - [NDE1_HUMAN]	Q9NXR1	S309	Nuclear distribution protein nudE homolog 1 (NudE)	NDE1 NUDE	ERRPSSTSVPLGDKG	1.91903	1.5757	Up	1.896	1.76056	0.922959	0.816037	1.91903	1.5757	0.940376	0.655997	13400000	18300000	25300000	10400000	38700000	28700000	7.58771	7.45788	39721	59777
Q49A26	1	Nuclear protein NP60 OS=Homo sapiens GN=NP60 PE=1 SV=2 - [NP60_HUMAN]	Q49A26	S130	Putative oxidoreductase GLYR1 (EC 1.-.-.-) (3-hydroxyisobutyrate dehydrogenase-like protein) (Cytokine-like nuclear factor N-PAC) (Glyoxylate reductase 1 homolog) (Nuclear protein NP60) (Nuclear protein of 60 kDa)	GLYR1 HIBDL NP60	GDEKRKLSLSEGKVK	1.57895	1.53516	Up	1.56	1.71527	0.641546	0.778432	1.57895	1.53516	0.658963	0.618392	855000	6960000	1330000	4060000	2185000	11020000	6.33945	7.04218	54865	83339
Q6GQQ9	1	OTU domain-containing protein 7B OS=Homo sapiens GN=OTUD7B PE=1 SV=1 - [OTU7B_HUMAN]	Q6GQQ9	S508	OTU domain-containing protein 7B (EC 3.4.19.12) (Cellular zinc finger anti-NF-kappa-B protein) (Zinc finger A20 domain-containing protein 1) (Zinc finger protein Cezanne)	OTUD7B ZA20D1	SVANKLGSFGKTLGS	2.3357	2.12626	Down	0.423	0.525486	-1.24127	-0.928276	0.428138	0.47031	-1.22385	-1.08832	10600000	8170000	4490000	15500000	15090000	23670000	7.17869	7.3742	51078	115697
Q8N573	1	Oxidation resistance protein 1 OS=Homo sapiens GN=OXR1 PE=1 SV=1 - [OXR1_HUMAN]	Q8N573	S112	Oxidation resistance protein 1	OXR1 Nbla00307	IRPARVVSSTSEEEE	1.5081	1.79	Up	1.49	2	0.575312	1	1.5081	1.79	0.592729	0.83996	2700000	8250000	4020000	4120000	6720000	12370000	6.82737	7.09237	67610	104794	AGC/AKT	AKT1
Q9BXB4	1	Oxysterol-binding protein-related protein 11 OS=Homo sapiens GN=OSBPL11 PE=1 SV=2 - [OSB11_HUMAN]	Q9BXB4	S189	Oxysterol-binding protein-related protein 11 (ORP-11) (OSBP-related protein 11)	OSBPL11 ORP11 OSBP12	PISQRRPSQNAISFF	1.5668	2.14115	Up	1.548	2.39234	0.630405	1.25843	1.5668	2.14115	0.647823	1.09838	75400000	267000000	117000000	112000000	192400000	379000000	8.28421	8.57864	49279	74450
Q15154	1	Pericentriolar material 1 protein OS=Homo sapiens GN=PCM1 PE=1 SV=2 - [PCM1_HUMAN]	Q15154	S384	Pericentriolar material 1 protein (PCM-1) (hPCM-1)	PCM1	VSQSRKPSASERLPD	1.86032	1.61844	Up	1.838	1.80832	0.878137	0.854649	1.86032	1.61844	0.895554	0.694608	10800000	17900000	19800000	9920000	30600000	27820000	7.48572	7.44436	89143	72719
O75167	1	Phosphatase and actin regulator 2 OS=Homo sapiens GN=PHACTR2 PE=1 SV=2 - [PHAR2_HUMAN]	O75167	S522	Phosphatase and actin regulator 2	PHACTR2 C6orf56 KIAA0680	TKLVRRLSQRPTTEE	1.84673	1.53408	Down	0.535	0.728332	-0.902389	-0.457332	0.541498	0.651857	-0.884972	-0.617372	82600000	37400000	44200000	51300000	126800000	88700000	8.10312	7.94792	50573	78544
O00443	1	Phosphatidylinositol-4-phosphate 3-kinase C2 domain-containing alpha polypeptide OS=Homo sapiens GN=PIK3C2A PE=1 SV=2 - [P3C2A_HUMAN]	O00443	S336	Phosphatidylinositol 4-phosphate 3-kinase C2 domain-containing subunit alpha (PI3K-C2-alpha) (PtdIns-3-kinase C2 subunit alpha) (EC 2.7.1.154) (Phosphoinositide 3-kinase-C2-alpha)	PIK3C2A	SVATVTRSQSLNIRT	1.78662	1.57207	Down	0.553	0.710732	-0.854649	-0.492622	0.559717	0.636105	-0.837232	-0.652663	3330000	52400000	1840000	73800000	5170000	126200000	6.71349	8.10106	536	22791
Q6VY07	1	Phosphofurin acidic cluster sorting protein 1 OS=Homo sapiens GN=PACS1 PE=1 SV=2 - [PACS1_HUMAN]	Q6VY07	T504	Phosphofurin acidic cluster sorting protein 1 (PACS-1)	PACS1 KIAA1175	SKVEGVHTPRQKRST	2.26606	2.55307	Down	0.436	0.437637	-1.1976	-1.19219	0.441296	0.391685	-1.18018	-1.35223	20100000	10200000	8760000	23300000	28860000	33500000	7.4603	7.52504	87274	68345
Q93100	1	Phosphorylase b kinase regulatory subunit beta OS=Homo sapiens GN=PHKB PE=1 SV=3 - [KPBB_HUMAN]	Q93100	S27	Phosphorylase b kinase regulatory subunit beta (Phosphorylase kinase subunit beta)	PHKB	ARTKRSGSVYEPLKS	1.58603	1.83402	Up	1.567	2.04918	0.648005	1.03505	1.58603	1.83402	0.665422	0.875007	19500000	35300000	30600000	17200000	50100000	52500000	7.69984	7.72016	40134	144755	AGC/PKG	PKG1
Q9H7P9	1	Pleckstrin homology domain-containing family G member 2 OS=Homo sapiens GN=PLEKHG2 PE=1 SV=2 - [PKHG2_HUMAN]	Q9H7P9	S450	Pleckstrin homology domain-containing family G member 2 (PH domain-containing family G member 2)	PLEKHG2	PLTPPLGSPRPRDAR	1.61175	1.70391	Down	0.613	0.655738	-0.706041	-0.608809	0.620445	0.586885	-0.688624	-0.76885	27000000	35400000	16600000	54000000	43600000	89400000	7.63949	7.95134	83499	61582
O94827	1	Pleckstrin homology domain-containing family G member 5 OS=Homo sapiens GN=PLEKHG5 PE=2 SV=3 - [PKHG5_HUMAN]	O94827	S249	Pleckstrin homology domain-containing family G member 5 (PH domain-containing family G member 5) (Guanine nucleotide exchange factor 720) (GEF720)	PLEKHG5 KIAA0720	DAQSRRESLDILAPG	1.56984	1.90021	Up	1.551	2.12314	0.633199	1.0862	1.56984	1.90021	0.650616	0.926161	2720000	7900000	4220000	3720000	6940000	11620000	6.84136	7.06521	51393	79425	Other/AUR/AUR-B	AurB
Q53GL0	1	Pleckstrin homology domain-containing family O member 1 OS=Homo sapiens GN=PLEKHO1 PE=1 SV=2 - [PKHO1_HUMAN]	Q53GL0	T254	Pleckstrin homology domain-containing family O member 1 (PH domain-containing family O member 1) (C-Jun-binding protein) (JBP) (Casein kinase 2-interacting protein 1) (CK2-interacting protein 1) (CKIP-1) (Osteoclast maturation-associated gene 120 protein)	PLEKHO1 CKIP1 HQ0024c OC120	TDKGATYTPQAPKKL	1.78018	1.64358	Down	0.555	0.67981	-0.84944	-0.556797	0.561741	0.60843	-0.832023	-0.716838	5750000	31700000	3190000	46600000	8940000	78300000	6.95134	7.89376	8286	26101
Q86UU1	1	Pleckstrin homology-like domain family B member 1 OS=Homo sapiens GN=PHLDB1 PE=1 SV=1 - [PHLB1_HUMAN]	Q86UU1	S430	Pleckstrin homology-like domain family B member 1 (Protein LL5-alpha)	PHLDB1 KIAA0638 LL5A DLNB07	QLVGRTFSDGLATRT	2.09413	1.71128	Up	2.069	1.91205	1.04893	0.935117	2.09413	1.71128	1.06635	0.775077	14100000	56800000	29100000	29800000	43200000	86600000	7.63548	7.93752	105321	27417	CAMK/CAMKL	QIK
Q86UU1	1	Pleckstrin homology-like domain family B member 1 OS=Homo sapiens GN=PHLDB1 PE=1 SV=1 - [PHLB1_HUMAN]	Q86UU1	S578	Pleckstrin homology-like domain family B member 1 (Protein LL5-alpha)	PHLDB1 KIAA0638 LL5A DLNB07	VTRERKNSITEISDN	2.1417	2.17233	Up	2.116	2.42718	1.08134	1.27928	2.1417	2.17233	1.09876	1.11924	729000	2820000	1540000	1160000	2269000	3980000	6.35583	6.59988	46457	88767
Q86UU1	1	Pleckstrin homology-like domain family B member 1 OS=Homo sapiens GN=PHLDB1 PE=1 SV=1 - [PHLB1_HUMAN]	Q86UU1	S1017	Pleckstrin homology-like domain family B member 1 (Protein LL5-alpha)	PHLDB1 KIAA0638 LL5A DLNB07	LTQNGTGSLPRNLAA	1.91103	2.25028	Down	0.517	0.496524	-0.951764	-1.01006	0.523279	0.444389	-0.934347	-1.1701	35400000	48400000	18300000	97400000	53700000	145800000	7.72997	8.16376	105861	117445
Q86UU1	1	Pleckstrin homology-like domain family B member 1 OS=Homo sapiens GN=PHLDB1 PE=1 SV=1 - [PHLB1_HUMAN]	Q86UU1	S489	Pleckstrin homology-like domain family B member 1 (Protein LL5-alpha)	PHLDB1 KIAA0638 LL5A DLNB07	LNREVAESPRPRRWA	2.39806	2.70503	Down	0.412	0.413052	-1.27928	-1.2756	0.417004	0.369682	-1.26187	-1.43564	8450000	5520000	3480000	13400000	11930000	18920000	7.07664	7.27692	91483	143410
Q86SQ0	1	Pleckstrin homology-like domain family B member 2 OS=Homo sapiens GN=PHLDB2 PE=1 SV=2 - [PHLB2_HUMAN]	Q86SQ0	S212	Pleckstrin homology-like domain family B member 2 (Protein LL5-beta)	PHLDB2 LL5B	PKQARKMSIQDSLAL	1.77632	1.74464	Up	1.755	1.94932	0.811471	0.962969	1.77632	1.74464	0.828888	0.802929	4280000	46700000	7510000	23900000	11790000	70600000	7.07151	7.8488	80191	55141
Q86SQ0	1	Pleckstrin homology-like domain family B member 2 OS=Homo sapiens GN=PHLDB2 PE=1 SV=2 - [PHLB2_HUMAN]	Q86SQ0	S468	Pleckstrin homology-like domain family B member 2 (Protein LL5-beta)	PHLDB2 LL5B	TKPDSRLSTGTTVED	1.71255	1.61552	Up	1.692	1.80505	0.75873	0.852042	1.71255	1.61552	0.776147	0.692002	1620000	5530000	2750000	3060000	4370000	8590000	6.64048	6.93399	25043	103956
Q15149	1	Plectin-1 OS=Homo sapiens GN=PLEC1 PE=1 SV=2 - [PLEC1_HUMAN]	Q15149	S4396	Plectin (PCN) (PLTN) (Hemidesmosomal protein 1) (HD1) (Plectin-1)	PLEC PLEC1	SSSSYPISPAVSRTQ	1.89272	2.21676	Down	0.522	0.504032	-0.937878	-0.988412	0.52834	0.451109	-0.920461	-1.14845	194000000	94200000	101000000	187000000	295000000	281200000	8.46982	8.44902	4492	27328	CMGC/CDK/CDC2	CDC2, CDK2
Q15751	1	Probable E3 ubiquitin-protein ligase HERC1 OS=Homo sapiens GN=HERC1 PE=1 SV=1 - [HERC1_HUMAN]	Q15751	S2720	Probable E3 ubiquitin-protein ligase HERC1 (EC 6.3.2.-) (HECT domain and RCC1-like domain-containing protein 1) (p532) (p619)	HERC1	DEVGRRQSLTSPDSQ	1.70648	2.40591	Up	1.686	2.68817	0.753605	1.42663	1.70648	2.40591	0.771022	1.26659	16200000	8470000	27300000	3150000	43500000	11620000	7.63849	7.06521	91489	168423
Q96B36	1	Proline-rich AKT1 substrate 1 OS=Homo sapiens GN=AKT1S1 PE=1 SV=1 - [AKTS1_HUMAN]	Q96B36	T246	Proline-rich AKT1 substrate 1 (40 kDa proline-rich AKT substrate)	AKT1S1 PRAS40	LPRPRLNTSDFQKLK	1.57895	1.57848	Up	1.56	1.76367	0.641546	0.818579	1.57895	1.57848	0.658963	0.658539	1310000000	933000000	2050000000	529000000	3360000000	1462000000	9.52634	9.16495	4109	26809	AGC/SGK	SGK1
Q8TD16	1	Protein bicaudal D homolog 2 OS=Homo sapiens GN=BICD2 PE=1 SV=1 - [BICD2_HUMAN]	Q8TD16	T821	Protein bicaudal D homolog 2 (Bic-D 2)	BICD2 KIAA0699	APKTKPATPSL****	1.94488	1.66257	Down	0.508	0.672043	-0.9771	-0.573375	0.51417	0.601478	-0.959683	-0.733415	13500000	5140000	6880000	7650000	20380000	12790000	7.3092	7.10687	13215	31474	Other/PLK	PLK1
Q5TDH0	1	Protein DDI1 homolog 2 OS=Homo sapiens GN=DDI2 PE=1 SV=1 - [DDI2_HUMAN]	Q5TDH0	S106	Protein DDI1 homolog 2	DDI2	IAVPGTSSPRQRQPP	2.13853	2.20559	Down	0.462	0.506586	-1.11404	-0.981122	0.467611	0.453394	-1.09662	-1.14116	75700000	31800000	35000000	62700000	110700000	94500000	8.04415	7.97543	107631	30055
A6ND36	1	Protein FAM83G OS=Homo sapiens GN=FAM83G PE=1 SV=2 - [FA83G_HUMAN]	A6ND36	S760	Protein FAM83G	FAM83G	RLLPDPGSPRLAQNA	2.23529	1.93855	Down	0.442	0.576369	-1.17788	-0.794936	0.447368	0.51585	-1.16046	-0.954976	6640000	8310000	2940000	14400000	9580000	22710000	6.98137	7.35622	105108	23277
Q9Y219	1	Protein jagged-2 OS=Homo sapiens GN=JAG2 PE=1 SV=3 - [JAG2_HUMAN]	Q9Y219	S1208	Protein jagged-2 (Jagged2) (hJ2)	JAG2	FTKDPGRSPGRPAHW	1.55102	1.52291	Down	0.637	0.733676	-0.650635	-0.446786	0.644737	0.65664	-0.633218	-0.606826	5890000	7360000	3750000	10000000	9640000	17360000	6.98408	7.23955	57929	87921
Q86UE4	1	Protein LYRIC OS=Homo sapiens GN=MTDH PE=1 SV=2 - [LYRIC_HUMAN]	Q86UE4	S339	Protein LYRIC (3D3/LYRIC) (Astrocyte elevated gene-1 protein) (AEG-1) (Lysine-rich CEACAM1 co-isolated protein) (Metadherin) (Metastasis adhesion protein)	MTDH AEG1 LYRIC	NGKDWGRSWSDRSIF	1.71559	1.72447	Up	1.695	1.92678	0.761285	0.946194	1.71559	1.72447	0.778702	0.786153	14200000	4030000	24000000	2090000	38200000	6120000	7.58206	6.78675	41109	145671
Q96C90	1	Protein phosphatase 1 regulatory subunit 14B OS=Homo sapiens GN=PPP1R14B PE=1 SV=3 - [PP14B_HUMAN]	Q96C90	T57	Protein phosphatase 1 regulatory subunit 14B (Phospholipase C-beta-3 neighbouring gene protein)	PPP1R14B PLCB3N PNG	VRRQGKVTVKYDRKE	1.79636	1.78436	Down	0.55	0.626174	-0.862496	-0.675364	0.55668	0.560426	-0.845079	-0.835405	8080000	10300000	4440000	16400000	12520000	26700000	7.0976	7.42651	50099	78023	TKL/MLK	ILK
Q9ULL8	1	Protein Shroom4 OS=Homo sapiens GN=SHROOM4 PE=1 SV=2 - [SHRM4_HUMAN]	Q9ULL8	T590	Protein Shroom4 (Second homolog of apical protein)	SHROOM4 KIAA1202 SHAP	RKSERFATNLRNEIQ	1.94872	2.00782	Down	0.507	0.556483	-0.979942	-0.84559	0.513158	0.498052	-0.962525	-1.00563	49200000	14100000	25000000	25300000	74200000	39400000	7.8704	7.5955	41263	145797
Q9C0D5	1	Protein TANC1 OS=Homo sapiens GN=TANC1 PE=1 SV=2 - [TANC1_HUMAN]	Q9C0D5	S67	Protein TANC1 (Tetratricopeptide repeat, ankyrin repeat and coiled-coil domain-containing protein 1)	TANC1 KIAA1728	VSMSLPSSPLLPRQS	1.85714	2.60335	Down	0.532	0.429185	-0.910502	-1.22033	0.538462	0.38412	-0.893085	-1.38037	19000000	1820000	10100000	4240000	29100000	6060000	7.46389	6.78247	21241	97399
Q9C0D5	1	Protein TANC1 OS=Homo sapiens GN=TANC1 PE=1 SV=2 - [TANC1_HUMAN]	Q9C0D5	T687	Protein TANC1 (Tetratricopeptide repeat, ankyrin repeat and coiled-coil domain-containing protein 1)	TANC1 KIAA1728	LNGKADATLIGKVSS	1.56825	1.65698	Down	0.63	0.674309	-0.666576	-0.568519	0.637652	0.603506	-0.649159	-0.728559	2420000	2780000	1520000	4130000	3940000	6910000	6.5955	6.83948	9549	109238
Q6V0I7	1	Protocadherin Fat 4 OS=Homo sapiens GN=FAT4 PE=2 SV=2 - [FAT4_HUMAN]	Q6V0I7	S4655	Protocadherin Fat 4 (hFat4) (Cadherin family member 14) (FAT tumor suppressor homolog 4) (Fat-like cadherin protein FAT-J)	FAT4 CDHF14 FATJ Nbla00548	KFSIQRHSPLGFARQ	1.71528	1.52626	Down	0.576	0.732064	-0.795859	-0.449957	0.582996	0.655198	-0.778442	-0.609998	15600000	23700000	8970000	32400000	24570000	56100000	7.39041	7.74896	51506	170568
Q8TB72	1	Pumilio homolog 2 OS=Homo sapiens GN=PUM2 PE=1 SV=2 - [PUM2_HUMAN]	Q8TB72	S587	Pumilio homolog 2 (Pumilio-2)	PUM2 KIAA0235 PUMH2	SSATRRESLSTSSDL	1.94433	1.84536	Up	1.921	2.06186	0.941858	1.04394	1.94433	1.84536	0.959275	0.883903	23000000	67500000	44200000	32800000	67200000	100300000	7.82737	8.0013	36356	134777
Q15276	1	Rab GTPase-binding effector protein 1 OS=Homo sapiens GN=RABEP1 PE=1 SV=2 - [RABE1_HUMAN]	Q15276	S410	Rab GTPase-binding effector protein 1 (Rabaptin-4) (Rabaptin-5) (Rabaptin-5alpha) (Renal carcinoma antigen NY-REN-17)	RABEP1 RAB5EP RABPT5 RABPT5A	RRAQSTDSLGTSGSL	1.87476	2.13408	Down	0.527	0.52356	-0.924125	-0.933573	0.533401	0.468586	-0.906708	-1.09361	34800000	21500000	18300000	41000000	53100000	62500000	7.72509	7.79588	104346	114214	STE/STE20	NRK
Q9UJ41	1	Rab5 GDP/GTP exchange factor OS=Homo sapiens GN=RABGEF1 PE=1 SV=2 - [RABX5_HUMAN]	Q9UJ41	S302	Rab5 GDP/GTP exchange factor (RAP1) (Rabaptin-5-associated exchange factor for Rab5) (Rabex-5)	RABGEF1 RABEX5	IQEAKAPSPSINRQT	2.31925	2.09609	Down	0.426	0.533049	-1.23107	-0.90766	0.431174	0.477079	-1.21366	-1.0677	33900000	9080000	14400000	17000000	48300000	26080000	7.68395	7.41631	36095	51188
Q8NHQ8	1	Ras association domain-containing protein 8 OS=Homo sapiens GN=RASSF8 PE=1 SV=2 - [RASF8_HUMAN]	Q8NHQ8	S387	Ras association domain-containing protein 8 (Carcinoma-associated protein HOJ-1)	RASSF8 C12orf2	EAPFQSGSLKRPGSS	2.41565	1.78101	Down	0.409	0.627353	-1.28983	-0.672652	0.413968	0.561481	-1.27241	-0.832692	38400000	6770000	15700000	10800000	54100000	17570000	7.7332	7.24477	48073	151178
Q8NHQ8	1	Ras association domain-containing protein 8 OS=Homo sapiens GN=RASSF8 PE=1 SV=2 - [RASF8_HUMAN]	Q8NHQ8	T131	Ras association domain-containing protein 8 (Carcinoma-associated protein HOJ-1)	RASSF8 C12orf2	EPKRKSLTFTGGAKG	1.70639	1.70838	Down	0.579	0.654022	-0.788365	-0.612588	0.586032	0.58535	-0.770948	-0.772629	2580000	12000000	1490000	18400000	4070000	30400000	6.60959	7.48287	10967	27606
Q5U651	1	Ras-interacting protein 1 OS=Homo sapiens GN=RASIP1 PE=1 SV=1 - [RAIN_HUMAN]	Q5U651	S331	Ras-interacting protein 1 (Rain)	RASIP1	RRSVSELSLQGRRRR	1.72773	1.60394	Up	1.707	1.79211	0.771463	0.841663	1.72773	1.60394	0.78888	0.681623	279000000	225000000	476000000	126000000	755000000	351000000	8.87795	8.54531	4673	27370
Q5U651	1	Ras-interacting protein 1 OS=Homo sapiens GN=RASIP1 PE=1 SV=1 - [RAIN_HUMAN]	Q5U651	S44	Ras-interacting protein 1 (Rain)	RASIP1	RRWPSAASVKSSSSD	2.333	2.70393	Up	2.305	3.02115	1.20477	1.5951	2.333	2.70393	1.22218	1.43506	28900000	68900000	66600000	22800000	95500000	91700000	7.98	7.96237	4785	23570
Q5U651	1	Ras-interacting protein 1 OS=Homo sapiens GN=RASIP1 PE=1 SV=1 - [RAIN_HUMAN]	Q5U651	S47	Ras-interacting protein 1 (Rain)	RASIP1	PSAASVKSSSSDTGS	2.33502	3.36466	Up	2.307	3.7594	1.20602	1.9105	2.33502	3.36466	1.22344	1.75046	8030000	24900000	18500000	6640000	26530000	31540000	7.42374	7.49886	70765	23384
Q5U651	1	Ras-interacting protein 1 OS=Homo sapiens GN=RASIP1 PE=1 SV=1 - [RAIN_HUMAN]	Q5U651	S50	Ras-interacting protein 1 (Rain)	RASIP1	ASVKSSSSDTGSRSS	2.33502	3.36466	Up	2.307	3.7594	1.20602	1.9105	2.33502	3.36466	1.22344	1.75046	8030000	24900000	18500000	6640000	26530000	31540000	7.42374	7.49886	70765	23384
Q8WUF5	1	RelA-associated inhibitor OS=Homo sapiens GN=PPP1R13L PE=1 SV=4 - [IASPP_HUMAN]	Q8WUF5	S134	RelA-associated inhibitor (Inhibitor of ASPP protein) (Protein iASPP) (NFkB-interacting protein 1) (PPP1R13B-like protein)	PPP1R13L IASPP NKIP1 PPP1R13BL RAI	LQPDAYGSLDRATSP	2.57963	2.11397	Down	0.383	0.528541	-1.38458	-0.919912	0.387652	0.473044	-1.36717	-1.07995	59700000	55500000	22900000	105000000	82600000	160500000	7.91698	8.20548	107407	29782
Q8WUF5	1	RelA-associated inhibitor OS=Homo sapiens GN=PPP1R13L PE=1 SV=4 - [IASPP_HUMAN]	Q8WUF5	T308	RelA-associated inhibitor (Inhibitor of ASPP protein) (Protein iASPP) (NFkB-interacting protein 1) (PPP1R13B-like protein)	PPP1R13L IASPP NKIP1 PPP1R13BL RAI	KDNLTSATLPRNYKV	2.80682	2.62458	Down	0.352	0.425713	-1.50635	-1.23205	0.356275	0.381013	-1.48894	-1.39209	6160000	16300000	2170000	38200000	8330000	54500000	6.92065	7.7364	10693	116337
Q8WUF5	1	RelA-associated inhibitor OS=Homo sapiens GN=PPP1R13L PE=1 SV=4 - [IASPP_HUMAN]	Q8WUF5	T341	RelA-associated inhibitor (Inhibitor of ASPP protein) (Protein iASPP) (NFkB-interacting protein 1) (PPP1R13B-like protein)	PPP1R13L IASPP NKIP1 PPP1R13BL RAI	GSAGPSGTLPRSWQP	2.17143	2.0648	Down	0.455	0.541126	-1.13606	-0.885965	0.460526	0.484307	-1.11864	-1.04601	24500000	54700000	11200000	101000000	35700000	155700000	7.55267	8.19229	105089	27209
Q8IUW5	1	RELT-like protein 1 OS=Homo sapiens GN=RELL1 PE=1 SV=1 - [RELL1_HUMAN]	Q8IUW5	S244	RELT-like protein 1	RELL1 PSEC0162	SNQKERRSLMSVSGA	2.14676	1.63919	Up	2.121	1.8315	1.08474	0.873027	2.14676	1.63919	1.10216	0.712987	1150000	7250000	2450000	3960000	3600000	11210000	6.5563	7.04961	64546	45132	STE/STE20	OSR1
Q52LW3	1	Rho GTPase-activating protein 29 OS=Homo sapiens GN=ARHGAP29 PE=1 SV=2 - [RHG29_HUMAN]	Q52LW3	S1144	Rho GTPase-activating protein 29 (PTPL1-associated RhoGAP protein 1) (Rho-type GTPase-activating protein 29)	ARHGAP29 PARG1	EASERRSSDSYPLAP	1.85628	1.80808	Up	1.834	2.0202	0.874994	1.0145	1.85628	1.80808	0.892411	0.854459	16000000	20400000	29300000	10100000	45300000	30500000	7.6561	7.4843	82465	60611	AGC/AKT	AKT1
Q96PE2	1	Rho guanine nucleotide exchange factor 17 OS=Homo sapiens GN=ARHGEF17 PE=1 SV=1 - [ARHGH_HUMAN]	Q96PE2	S914	Rho guanine nucleotide exchange factor 17 (164 kDa Rho-specific guanine-nucleotide exchange factor) (p164-RhoGEF) (p164RhoGEF) (Tumor endothelial marker 4)	ARHGEF17 KIAA0337 TEM4	PKLADILSPRLIRRG	2.12017	2.05028	Down	0.466	0.544959	-1.1016	-0.87578	0.47166	0.487738	-1.08418	-1.03582	87700000	31200000	40900000	57200000	128600000	88400000	8.10924	7.94645	5617	24307
A7KAX9	1	Rho/Cdc42/Rac GTPase-activating protein RICS OS=Homo sapiens GN=RICS PE=1 SV=1 - [RICS_HUMAN]	A7KAX9	S587	Rho GTPase-activating protein 32 (Brain-specific Rho GTPase-activating protein) (GAB-associated Cdc42/Rac GTPase-activating protein) (GC-GAP) (GTPase regulator interacting with TrkA) (Rho-type GTPase-activating protein 32) (Rho/Cdc42/Rac GTPase-activating protein RICS) (RhoGAP involved in the beta-catenin-N-cadherin and NMDA receptor signaling) (p200RhoGAP) (p250GAP)	ARHGAP32 GRIT KIAA0712 RICS	ASLSRPKSLLVSSPS	2.02935	1.74464	Up	2.005	1.94932	1.0036	0.962969	2.02935	1.74464	1.02102	0.802929	380000	3160000	763000	1620000	1143000	4780000	6.05805	6.67943	25158	17936
Q13464	1	Rho-associated protein kinase 1 OS=Homo sapiens GN=ROCK1 PE=1 SV=1 - [ROCK1_HUMAN]	Q13464	S1328	Rho-associated protein kinase 1 (EC 2.7.11.1) (Renal carcinoma antigen NY-REN-35) (Rho-associated, coiled-coil-containing protein kinase 1) (Rho-associated, coiled-coil-containing protein kinase I) (ROCK-I) (p160 ROCK-1) (p160ROCK)	ROCK1	PSGFVRASPRTLSTR	1.6039	1.62346	Down	0.616	0.688231	-0.698998	-0.539035	0.623482	0.615967	-0.681581	-0.699075	72100000	92100000	44400000	134000000	116500000	226100000	8.06633	8.3543	40097	60390
O75116	1	Rho-associated protein kinase 2 OS=Homo sapiens GN=ROCK2 PE=1 SV=3 - [ROCK2_HUMAN]	O75116	S1379	Rho-associated protein kinase 2 (EC 2.7.11.1) (Rho kinase 2) (Rho-associated, coiled-coil-containing protein kinase 2) (Rho-associated, coiled-coil-containing protein kinase II) (ROCK-II) (p164 ROCK-2)	ROCK2 KIAA0619	NQSIRRPSRQLAPNK	1.60628	1.94143	Up	1.587	2.1692	0.666302	1.11716	1.60628	1.94143	0.683719	0.957121	7880000	8610000	12500000	3970000	20380000	12580000	7.3092	7.09968	91436	77659
Q9HBD1	1	Ring finger and CCCH-type zinc finger domain-containing protein 2 OS=Homo sapiens GN=RC3H2 PE=1 SV=2 - [RC3H2_HUMAN]	Q9HBD1	S982	RING finger and CCCH-type zinc finger domain-containing protein 2 (Membrane-associated nucleic acid-binding protein) (RING finger protein 164)	RC3H2 MNAB RNF164	LSGHRKHSSTGDLLS	1.80466	1.88025	Up	1.783	2.10084	0.834307	1.07097	1.80466	1.88025	0.851724	0.910926	288000	2140000	514000	1020000	802000	3160000	5.90417	6.49969	90945	77175
Q9Y3C5	1	RING finger protein 11 OS=Homo sapiens GN=RNF11 PE=1 SV=1 - [RNF11_HUMAN]	Q9Y3C5	S14	RING finger protein 11	RNF11 CGI-123	SPTSDDISLLHESQS	1.58587	1.57877	Down	0.623	0.707714	-0.682696	-0.498761	0.630567	0.633404	-0.665279	-0.658802	11500000	1830000	7190000	2590000	18690000	4420000	7.27161	6.64542	76024	125197
Q96PK6	1	RNA-binding protein 14 OS=Homo sapiens GN=RBM14 PE=1 SV=2 - [RBM14_HUMAN]	Q96PK6	S620	RNA-binding protein 14 (Paraspeckle protein 2) (PSP2) (RNA-binding motif protein 14) (RRM-containing coactivator activator/modulator) (Synaptotagmin-interacting protein) (SYT-interacting protein)	RBM14 SIP	DYRRLSESQLSFRRS	2.01113	1.91239	Up	1.987	2.13675	0.990592	1.09542	2.01113	1.91239	1.00801	0.935379	34100000	27600000	67800000	12900000	101900000	40500000	8.00817	7.60746	5953	111088
O94885	1	SAM and SH3 domain-containing protein 1 OS=Homo sapiens GN=SASH1 PE=1 SV=3 - [SASH1_HUMAN]	O94885	S743	SAM and SH3 domain-containing protein 1 (Proline-glutamate repeat-containing protein)	SASH1 KIAA0790 PEPE1	NGKTRKASLLSAKSS	2.07186	2.11085	Up	2.047	2.35849	1.03351	1.23786	2.07186	2.11085	1.05093	1.07782	2860000	19000000	5850000	8060000	8710000	27060000	6.94002	7.43233	39996	59874
Q9UHD8	1	Septin-9 OS=Homo sapiens GN=SEPT9 PE=1 SV=2 - [SEPT9_HUMAN]	Q9UHD8	T142	Septin-9 (MLL septin-like fusion protein MSF-A) (MLL septin-like fusion protein) (Ovarian/Breast septin) (Ov/Br septin) (Septin D1)	SEPT9 KIAA0991 MSF	AEVLGHKTPEPAPRR	2.77528	1.67374	Down	0.356	0.667557	-1.49005	-0.583038	0.360324	0.597463	-1.47263	-0.743078	65200000	50900000	23200000	76200000	88400000	127100000	7.94645	8.10415	58800	90342
O94804	1	Serine/threonine-protein kinase 10 OS=Homo sapiens GN=STK10 PE=1 SV=1 - [STK10_HUMAN]	O94804	S514	Serine/threonine-protein kinase 10 (EC 2.7.11.1) (Lymphocyte-oriented kinase)	STK10 LOK	SLNKEMGSLSIKDPK	2.54639	2.65475	Down	0.388	0.420875	-1.36587	-1.24853	0.392713	0.376684	-1.34845	-1.40858	11800000	12700000	4600000	30100000	16400000	42800000	7.21484	7.63144	79138	134332
Q9Y2K2	1	Serine/threonine-protein kinase QSK OS=Homo sapiens GN=QSK PE=1 SV=3 - [QSK_HUMAN]	Q9Y2K2	S808	Serine/threonine-protein kinase SIK3 (EC 2.7.11.1) (Salt-inducible kinase 3) (SIK-3) (Serine/threonine-protein kinase QSK)	SIK3 KIAA0999 QSK L19	RPLSKQLSADSAEAH	1.57287	1.86848	Up	1.554	2.08768	0.635987	1.0619	1.57287	1.86848	0.653404	0.901862	17900000	14800000	27800000	7070000	45700000	21870000	7.65992	7.33985	78706	51628	CAMK/CAMKL	BRSK1, BRSK2, MARK2, MARK3, MARK4, MELK, NuaK1, NuaK2, QIK
Q5VZ18	1	SH2 domain-containing adapter protein E OS=Homo sapiens GN=SHE PE=2 SV=1 - [SHE_HUMAN]	Q5VZ18	S69	SH2 domain-containing adapter protein E	SHE	GGKLRKNSEAGGAGP	1.6002	2.14628	Up	1.581	2.39808	0.660837	1.26188	1.6002	2.14628	0.678254	1.10184	18200000	30100000	28800000	12600000	47000000	42700000	7.6721	7.63043	49656	168023	AGC/AKT	AKT1
Q9BYB0	1	SH3 and multiple ankyrin repeat domains protein 3 OS=Homo sapiens GN=SHANK3 PE=1 SV=2 - [SHAN3_HUMAN]	Q9BYB0	S366	SH3 and multiple ankyrin repeat domains protein 3 (Shank3) (Proline-rich synapse-associated protein 2) (ProSAP2)	SHANK3 KIAA1650 PSAP2	AGPSGLASPRPLQRS	1.78018	1.9162	Down	0.555	0.58309	-0.84944	-0.778209	0.561741	0.521866	-0.832023	-0.938249	295000000	309000000	164000000	529000000	459000000	838000000	8.66181	8.92324	37146	52095
Q9BYB0	1	SH3 and multiple ankyrin repeat domains protein 3 OS=Homo sapiens GN=SHANK3 PE=1 SV=2 - [SHAN3_HUMAN]	Q9BYB0	T553	SH3 and multiple ankyrin repeat domains protein 3 (Shank3) (Proline-rich synapse-associated protein 2) (ProSAP2)	SHANK3 KIAA1650 PSAP2	KRLFRHYTVGSYDSL	1.89635	1.65363	Down	0.521	0.675676	-0.940645	-0.565597	0.527328	0.60473	-0.923228	-0.725638	9820000	8380000	5120000	12400000	14940000	20780000	7.17435	7.31765	86036	64096
Q9P0V3	1	SH3 domain-binding protein 4 OS=Homo sapiens GN=SH3BP4 PE=1 SV=1 - [SH3B4_HUMAN]	Q9P0V3	S279	SH3 domain-binding protein 4 (EH-binding protein 10) (Transferrin receptor-trafficking protein)	SH3BP4 BOG25 EHB10 TTP	PAPEQFQSREDFRTA	1.5668	1.60394	Up	1.548	1.79211	0.630405	0.841663	1.5668	1.60394	0.647823	0.681623	70600000	75000000	109000000	41800000	179600000	116800000	8.25431	8.06744	36703	51717
Q7Z6B7	1	SLIT-ROBO Rho GTPase-activating protein 1 OS=Homo sapiens GN=SRGAP1 PE=1 SV=1 - [SRGP1_HUMAN]	Q7Z6B7	S932	SLIT-ROBO Rho GTPase-activating protein 1 (srGAP1) (Rho GTPase-activating protein 13)	SRGAP1 ARHGAP13 KIAA1304	DSLKKIDSPPIRRST	1.61702	1.58212	Down	0.611	0.706215	-0.710756	-0.501821	0.618421	0.632062	-0.693339	-0.661862	21400000	30800000	13100000	43600000	34500000	74400000	7.53782	7.87157	52579	83564
O00193	1	Small acidic protein OS=Homo sapiens GN=SMAP PE=1 SV=1 - [SMAP_HUMAN]	O00193	S87	Small acidic protein	SMAP C11orf58	LESQYQQSMDSKLSG	2.20749	1.70476	Up	2.181	1.90476	1.12499	0.929611	2.20749	1.70476	1.14241	0.76957	6910000	10800000	15100000	5670000	22010000	16470000	7.34262	7.21669	40123	60425
Q9UBP0	1	Spastin OS=Homo sapiens GN=SPAST PE=1 SV=1 - [SPAST_HUMAN]	Q9UBP0	T303	Spastin (EC 3.6.4.3) (Spastic paraplegia 4 protein)	SPAST ADPSP FSP2 KIAA1083 SPG4	NRTNKPSTPTTATRK	1.79636	2.03017	Down	0.55	0.550358	-0.862496	-0.861558	0.55668	0.49257	-0.845079	-1.0216	49400000	10800000	27200000	19500000	76600000	30300000	7.88423	7.48144	47032	164332	CMGC/CDK/CDC2	CDC2
P28290	1	Sperm-specific antigen 2 OS=Homo sapiens GN=SSFA2 PE=1 SV=3 - [SSFA2_HUMAN]	P28290	S593	Sperm-specific antigen 2 (Cleavage signal-1 protein) (CS-1) (Ki-ras-induced actin-interacting protein)	SSFA2 CS1 KIAA1927 KRAP	ADKRKSGSQDFPQCN	2.11032	1.79	Up	2.085	2	1.06005	1	2.11032	1.79	1.07746	0.83996	29200000	34600000	60800000	17300000	90000000	51900000	7.95424	7.71517	67275	100646
Q05519	1	Splicing factor arginine/serine-rich 11 OS=Homo sapiens GN=SFRS11 PE=1 SV=1 - [SFR11_HUMAN]	Q05519	S456	Serine/arginine-rich splicing factor 11 (Arginine-rich 54 kDa nuclear protein) (p54) (Splicing factor, arginine/serine-rich 11)	SRSF11 SFRS11	SPKTKECSVEKGTGD	1.53894	2.09832	Down	0.642	0.532481	-0.639355	-0.909197	0.649798	0.476571	-0.621938	-1.06924	17200000	4730000	11000000	8890000	28200000	13620000	7.45025	7.13418	87022	67873
P16949	1	Stathmin OS=Homo sapiens GN=STMN1 PE=1 SV=3 - [STMN1_HUMAN]	P16949	S25	Stathmin (Leukemia-associated phosphoprotein p18) (Metablastin) (Oncoprotein 18) (Op18) (Phosphoprotein p19) (pp19) (Prosolin) (Protein Pr22) (pp17)	STMN1 C1orf215 LAP18 OP18	QAFELILSPRSKESV	1.65688	1.91649	Up	1.637	2.14133	0.711054	1.09851	1.65688	1.91649	0.728471	0.938465	18600000	48200000	30500000	22600000	49100000	70800000	7.69108	7.85003	6476	30247	CMGC/CDK/CDC2	CDC2, CDK2
Q9H2G2	1	STE20-like serine/threonine-protein kinase OS=Homo sapiens GN=SLK PE=1 SV=1 - [SLK_HUMAN]	Q9H2G2	S779	STE20-like serine/threonine-protein kinase (STE20-like kinase) (hSLK) (EC 2.7.11.1) (CTCL tumor antigen se20-9) (STE20-related serine/threonine-protein kinase) (STE20-related kinase) (Serine/threonine-protein kinase 2)	SLK KIAA0204 STK2	SKTKDSGSISLQETR	2.39806	2.75866	Down	0.412	0.405022	-1.27928	-1.30393	0.417004	0.362495	-1.26187	-1.46397	22700000	8530000	9360000	21100000	32060000	29630000	7.50596	7.47173	66628	13450
O95425	1	Supervillin OS=Homo sapiens GN=SVIL PE=1 SV=1 - [SVIL_HUMAN]	O95425	S50	Supervillin (Archvillin) (p205/p250)	SVIL	MRASDPASPHIGRSN	1.84328	1.85475	Down	0.536	0.60241	-0.899695	-0.731183	0.54251	0.539157	-0.882278	-0.891224	66200000	53000000	35500000	87900000	101700000	140900000	8.00732	8.14891	35334	133767	CMGC/MAPK	Erk1
P56962	1	Syntaxin-17 OS=Homo sapiens GN=STX17 PE=2 SV=2 - [STX17_HUMAN]	P56962	S289	Syntaxin-17	STX17	MMEKLTSSCPDLPSQ	1.54859	2.04916	Down	0.638	0.545256	-0.648372	-0.874994	0.645749	0.488004	-0.630955	-1.03503	3230000	3570000	2060000	6560000	5290000	10130000	6.72346	7.00561	75135	54547
Q9Y490	1	Talin-1 OS=Homo sapiens GN=TLN1 PE=1 SV=3 - [TLN1_HUMAN]	Q9Y490	T144	Talin-1	TLN1 KIAA1027 TLN	KKEEITGTLRKDKTL	1.58842	1.66034	Down	0.622	0.672948	-0.685014	-0.571434	0.629555	0.602288	-0.667596	-0.731475	5470000	11900000	3400000	17700000	8870000	29600000	6.94792	7.47129	50156	78072
O60343	1	TBC1 domain family member 4 OS=Homo sapiens GN=TBC1D4 PE=1 SV=2 - [TBCD4_HUMAN]	O60343	S591	TBC1 domain family member 4 (Akt substrate of 160 kDa) (AS160)	TBC1D4 AS160 KIAA0603	GRLGSVDSFERSNSL	1.63036	1.70391	Down	0.606	0.655738	-0.72261	-0.608809	0.61336	0.586885	-0.705193	-0.76885	157000000	43900000	95200000	66900000	252200000	110800000	8.40175	8.04454	5096	117304
Q9Y2W1	1	Thyroid hormone receptor-associated protein 3 OS=Homo sapiens GN=THRAP3 PE=1 SV=2 - [TR150_HUMAN]	Q9Y2W1	S248	Thyroid hormone receptor-associated protein 3 (Thyroid hormone receptor-associated protein complex 150 kDa component) (Trap150)	THRAP3 TRAP150	ELSPRERSPALKSPL	2.26087	1.70279	Down	0.437	0.656168	-1.19429	-0.607863	0.442308	0.58727	-1.17688	-0.767903	5580000	14600000	2440000	22200000	8020000	36800000	6.90417	7.56585	48961	74211	CMGC/CDK	CDK8
Q07157	1	Tight junction protein ZO-1 OS=Homo sapiens GN=TJP1 PE=1 SV=3 - [ZO1_HUMAN]	Q07157	T1167	Tight junction protein ZO-1 (Tight junction protein 1) (Zona occludens protein 1) (Zonula occludens protein 1)	TJP1 ZO1	QPAPGYDTHGRLRPE	1.71231	1.57542	Down	0.577	0.70922	-0.793357	-0.495695	0.584008	0.634752	-0.77594	-0.655736	7460000	368000	4310000	520000	11770000	888000	7.07078	5.94841	91446	153602
Q07157	1	Tight junction protein ZO-1 OS=Homo sapiens GN=TJP1 PE=1 SV=3 - [ZO1_HUMAN]	Q07157	T589	Tight junction protein ZO-1 (Tight junction protein 1) (Zona occludens protein 1) (Zonula occludens protein 1)	TJP1 ZO1	QLASVQYTLPKTAGG	2.87209	1.76536	Down	0.344	0.632911	-1.53952	-0.659925	0.348178	0.566456	-1.5221	-0.819965	5100000	3590000	1750000	5670000	6850000	9260000	6.83569	6.96661	85872	64175	TKL/MLK	ILK, ZAK
Q9UDY2	1	Tight junction protein ZO-2 OS=Homo sapiens GN=TJP2 PE=1 SV=1 - [ZO2_HUMAN]	Q9UDY2	S986	Tight junction protein ZO-2 (Tight junction protein 2) (Zona occludens protein 2) (Zonula occludens protein 2)	TJP2 X104 ZO2	SDQLRDNSPPPAFKP	1.50152	1.72067	Down	0.658	0.649351	-0.603841	-0.62293	0.665992	0.581169	-0.586423	-0.782971	524000000	117000000	345000000	180000000	869000000	297000000	8.93902	8.47276	43358	66205	CMGC/MAPK	Erk2
Q9UKE5	1	TRAF2 and NCK-interacting protein kinase OS=Homo sapiens GN=TNIK PE=1 SV=1 - [TNIK_HUMAN]	Q9UKE5	S548	TRAF2 and NCK-interacting protein kinase (EC 2.7.11.1)	TNIK KIAA0551	SRLNRQSSPAMPHKV	1.53894	1.67933	Down	0.642	0.665336	-0.639355	-0.587845	0.649798	0.595476	-0.621938	-0.747885	42900000	20900000	27600000	31500000	70500000	52400000	7.84819	7.71933	77272	50169
Q92545	1	Transmembrane protein 131 OS=Homo sapiens GN=TMEM131 PE=1 SV=2 - [TM131_HUMAN]	Q92545	S1600	Transmembrane protein 131 (Protein RW1)	TMEM131 KIAA0257 RW1	HKLTKAASLPGKNGN	2.18421	1.55113	Up	2.158	1.7331	1.10969	0.793357	2.18421	1.55113	1.12711	0.633316	8050000	104000000	17400000	60100000	25450000	164100000	7.40569	8.21511	7964	113100
Q96K49	1	Transmembrane protein 87B OS=Homo sapiens GN=TMEM87B PE=2 SV=1 - [TM87B_HUMAN]	Q96K49	S496	Transmembrane protein 87B	TMEM87B	LRASKSVSNGTAKPA	2.12753	1.67917	Up	2.102	1.87617	1.07176	0.907793	2.12753	1.67917	1.08918	0.747752	24400000	8580000	51200000	4580000	75600000	13160000	7.87852	7.11926	75471	128226
Q12888	1	Tumor suppressor p53-binding protein 1 OS=Homo sapiens GN=TP53BP1 PE=1 SV=2 - [TP53B_HUMAN]	Q12888	S518	Tumor suppressor p53-binding protein 1 (53BP1) (p53-binding protein 1) (p53BP1)	TP53BP1	DSCKLMLSTSEYSQS	2.28846	1.61844	Up	2.261	1.80832	1.17696	0.854649	2.28846	1.61844	1.19438	0.694608	14700000	59600000	33200000	33000000	47900000	92600000	7.68034	7.96661	5275	27860
Q14157	1	Ubiquitin-associated protein 2-like OS=Homo sapiens GN=UBAP2L PE=1 SV=2 - [UBP2L_HUMAN]	Q14157	S416	Ubiquitin-associated protein 2-like (Protein NICE-4)	UBAP2L KIAA0144 NICE4	PSDSAVHSPFTKRQA	1.74558	2.24804	Down	0.566	0.497018	-0.821126	-1.00863	0.572874	0.444831	-0.803709	-1.16867	93600000	42300000	52900000	85000000	146500000	127300000	8.16584	8.10483	35881	50949
Q96A57	1	UPF0414 transmembrane protein C20orf30 OS=Homo sapiens GN=C20orf30 PE=2 SV=1 - [CT030_HUMAN]	Q96A57	S24	Transmembrane protein 230	TMEM230 C20orf30 HSPC274 UNQ2432/PRO4992	VKYSRLSSTDDGYID	2.00405	1.5247	Up	1.98	1.70358	0.9855	0.768568	2.00405	1.5247	1.00292	0.608527	23100000	56800000	45600000	33300000	68700000	90100000	7.83696	7.95472	6637	20914
Q5SQI0	1	UPF0635 protein C6orf134 OS=Homo sapiens GN=C6orf134 PE=2 SV=1 - [CF134_HUMAN]	Q5SQI0	S315	Alpha-tubulin N-acetyltransferase (Alpha-TAT) (TAT) (EC 2.3.1.108) (Acetyltransferase mec-17 homolog)	ATAT1 C6orf134 MEC17 Nbla00487	LAADPGGSPAQRRRT	1.8855	1.9676	Down	0.524	0.567859	-0.932361	-0.816395	0.530364	0.508234	-0.914944	-0.976435	85000000	26100000	44500000	45900000	129500000	72000000	8.11227	7.85733	5228	28179
P50552	1	Vasodilator-stimulated phosphoprotein OS=Homo sapiens GN=VASP PE=1 SV=3 - [VASP_HUMAN]	P50552	S239	Vasodilator-stimulated phosphoprotein (VASP)	VASP	GAKLRKVSKQEEASG	1.65587	2.06221	Up	1.636	2.30415	0.710173	1.20423	1.65587	2.06221	0.72759	1.04419	17300000	24000000	28400000	10400000	45700000	34400000	7.65992	7.53656	44741	67685	AGC/PKG	PKG1, PKG2
P50552	1	Vasodilator-stimulated phosphoprotein OS=Homo sapiens GN=VASP PE=1 SV=3 - [VASP_HUMAN]	P50552	S314	Vasodilator-stimulated phosphoprotein (VASP)	VASP	RRPWEKNSTTLPRMK	3.49117	2.49274	Down	0.283	0.448229	-1.82113	-1.15769	0.286437	0.401165	-1.80371	-1.31773	16600000	367000000	4710000	819000000	21310000	1186000000	7.32858	9.07408	69330	108481
O75396	1	Vesicle-trafficking protein SEC22b OS=Homo sapiens GN=SEC22B PE=1 SV=3 - [SC22B_HUMAN]	O75396	S137	Vesicle-trafficking protein SEC22b (ER-Golgi SNARE of 24 kDa) (ERS-24) (ERS24) (SEC22 vesicle-trafficking protein homolog B) (SEC22 vesicle-trafficking protein-like 1)	SEC22B SEC22L1	RARRNLGSINTELQD	1.90789	1.82653	Up	1.885	2.04082	0.914565	1.02915	1.90789	1.82653	0.931982	0.869106	56500000	57700000	107000000	28300000	163500000	86000000	8.21352	7.9345	6216	119459
P18206	1	Vinculin OS=Homo sapiens GN=VCL PE=1 SV=4 - [VINC_HUMAN]	P18206	S434	Vinculin (Metavinculin)	VCL	ERDDILRSLGEISAL	1.90081	1.56469	Up	1.878	1.74825	0.909197	0.805913	1.90081	1.56469	0.926614	0.645873	376000	1460000	707000	834000	1083000	2294000	6.03463	6.36059	102864	106565
O43516	1	WAS/WASL-interacting protein family member 1 OS=Homo sapiens GN=WIPF1 PE=1 SV=2 - [WIPF1_HUMAN]	O43516	T398	WAS/WASL-interacting protein family member 1 (Protein PRPL-2) (Wiskott-Aldrich syndrome protein-interacting protein) (WASP-interacting protein)	WIPF1 WASPIP WIP	TSRALPATPQLPSRS	1.78339	2.50838	Down	0.554	0.445434	-0.852042	-1.16672	0.560729	0.398664	-0.834625	-1.32676	6510000	9100000	3610000	20400000	10120000	29500000	7.00518	7.46982	11103	23823
O15231	1	Zinc finger protein 185 OS=Homo sapiens GN=ZNF185 PE=1 SV=2 - [ZN185_HUMAN]	O15231	T23	Zinc finger protein 185 (LIM domain protein ZNF185) (P1-A)	ZNF185	RSSTSGDTEEEEEEE	1.82963	1.5486	Down	0.54	0.721501	-0.888969	-0.470927	0.546559	0.645743	-0.871552	-0.630968	84600000	35900000	45700000	49700000	130300000	85600000	8.11494	7.93247	67972	15100
O15014	1	Zinc finger protein 609 OS=Homo sapiens GN=ZNF609 PE=1 SV=2 - [ZN609_HUMAN]	O15014	S1313	Zinc finger protein 609	ZNF609 KIAA0295	ASHYKSKSPTISDKT	2	1.65698	Down	0.494	0.674309	-1.01742	-0.568519	0.5	0.603506	-1	-0.728559	7410000	1700000	3660000	2510000	11070000	4210000	7.04415	6.62428	88917	164524
P10071	1	Zinc finger protein GLI3 OS=Homo sapiens GN=GLI3 PE=1 SV=5 - [GLI3_HUMAN]	P10071	S865	Transcriptional activator GLI3 (GLI3 form of 190 kDa) (GLI3-190) (GLI3 full length protein) (GLI3FL) [Cleaved into: Transcriptional repressor GLI3R (GLI3 C-terminally truncated form) (GLI3 form of 83 kDa) (GLI3-83)]	GLI3	YLSSRRSSGISPCFS	2.45445	2.19902	Up	2.425	2.457	1.27798	1.2969	2.45445	2.19902	1.2954	1.13686	1540000	1130000	3740000	459000	5280000	1589000	6.72263	6.20112	40147	144763
Q15942	1	Zyxin OS=Homo sapiens GN=ZYX PE=1 SV=1 - [ZYX_HUMAN]	Q15942	S259	Zyxin (Zyxin-2)	ZYX	PRGPPASSPAPAPKF	1.54617	1.65698	Down	0.639	0.674309	-0.646112	-0.568519	0.646761	0.603506	-0.628695	-0.728559	2550000000	3520000000	1630000000	5220000000	4180000000	8740000000	9.62118	9.94151	103478	25619	CMGC/DYRK	HIPK3
[truncated: 57 more columns]

## Sheet: Co-Upregulated
Protein Group Accessions	# of Protein Groups	Protein Descriptions	Acc. # 1	Sites Acc. # 1	Protein Names Acc. # 1	Gene Names Acc. # 1	Phosposite Sequence Context	Fold Upregulated Forward	Fold Upregulated Reverse	Ratio (Medium/Light) Forward	Ratio (Light/Medium) Reverse	Log2 Ratio (Medium/Light) Forward	Log2 Ratio (Light/Medium) Reverse	Normalized Ratio (Medium/Light) Forward	Normalized Ratio (Light/Medium) Reverse	Normalized Log2 Ratio (Medium/Light) Forward	Normalized Log2 Ratio (Light/Medium) Reverse	Intensity Light Forward	Intensity Light Reverse	Intensity Medium Forward	Intensity Medium Reverse	Intensity (Light+Medium) Forward	Intensity (Light+Medium) Reverse	Log10 Intensity (Light+Medium) Forward	Log10 Intensity (Light+Medium) Reverse	Quan Result ID Forward	Quan Result ID Reverse	Predicted Kinase Group/Family/Subfamily	Predicted Kinases	Acc. # 2	Sites Acc. # 2	Protein Names Acc. # 2	Gene Names Acc. # 2	Acc. # 3	Sites Acc. # 3	Protein Names Acc. # 3	Gene Names Acc. # 3	Acc. # 4	Sites Acc. # 4	Protein Names Acc. # 4	Gene Names Acc. # 4	Acc. # 5	Sites Acc. # 5	Protein Names Acc. # 5	Gene Names Acc. # 5	Acc. # 6	Sites Acc. # 6	Protein Names Acc. # 6	Gene Names Acc. # 6
Q9C0C2	1	182 kDa tankyrase 1-binding protein OS=Homo sapiens GN=TNKS1BP1 PE=1 SV=3 - [TB182_HUMAN]	Q9C0C2	S429	182 kDa tankyrase-1-binding protein	TNKS1BP1 KIAA1741 TAB182	SLVQRRFSEGVLQSP	1.54453	1.57293	1.526	1.75747	0.609755	0.813499	1.54453	1.57293	0.627172	0.653459	479000000	285000000	730000000	162000000	1209000000	447000000	9.08243	8.65031	37132	52072
Q2PPJ7	1	250 kDa substrate of Akt OS=Homo sapiens GN=C20orf74 PE=1 SV=2 - [AS250_HUMAN]	Q2PPJ7	S486	Ral GTPase-activating protein subunit alpha-2 (250 kDa substrate of Akt) (AS250) (p220)	RALGAPA2 C20orf74 KIAA1272	SSWGRTYSFTSAMSR	1.73583	1.5897	1.715	1.7762	0.778209	0.828793	1.73583	1.5897	0.795626	0.668753	1900000	64000000	3250000	36000000	5150000	100000000	6.71181	8	12214	27274
Q2PPJ7	1	250 kDa substrate of Akt OS=Homo sapiens GN=C20orf74 PE=1 SV=2 - [AS250_HUMAN]	Q2PPJ7	T484	Ral GTPase-activating protein subunit alpha-2 (250 kDa substrate of Akt) (AS250) (p220)	RALGAPA2 C20orf74 KIAA1272	RSSSWGRTYSFTSAM	1.70951	2.20988	1.689	2.46914	0.756169	1.30401	1.70951	2.20988	0.773586	1.14397	26700000	48200000	45000000	19500000	71700000	67700000	7.85552	7.83059	5567	24301
O60825	1	6-phosphofructo-2-kinase/fructose-2,6-biphosphatase 2 OS=Homo sapiens GN=PFKFB2 PE=1 SV=2 - [F262_HUMAN]	O60825	S466	6-phosphofructo-2-kinase/fructose-2,6-bisphosphatase 2 (6PF-2-K/Fru-2,6-P2ase 2) (PFK/FBPase 2) (6PF-2-K/Fru-2,6-P2ase heart-type isozyme) [Includes: 6-phosphofructo-2-kinase (EC 2.7.1.105); Fructose-2,6-bisphosphatase (EC 3.1.3.46)]	PFKFB2	PVRMRRNSFTPLSSS	1.8998	1.86071	1.877	2.079	0.908429	1.05589	1.8998	1.86071	0.925846	0.895851	4070000	6290000	7640000	3030000	11710000	9320000	7.06856	6.96942	40828	60938	AGC/AKT	AKT1
Q8TED9	1	Actin filament-associated protein 1-like 1 OS=Homo sapiens GN=AFAP1L1 PE=1 SV=2 - [AF1L1_HUMAN]	Q8TED9	S747	Actin filament-associated protein 1-like 1 (AFAP1-like protein 1)	AFAP1L1	ELRKRSPSIVASNQG	1.69737	1.78643	1.677	1.99601	0.745883	0.997117	1.69737	1.78643	0.7633	0.837077	80400000	97400000	135000000	48800000	215400000	146200000	8.33325	8.16495	39317	59376
O14639	1	Actin-binding LIM protein 1 OS=Homo sapiens GN=ABLIM1 PE=1 SV=3 - [ABLM1_HUMAN]	O14639	S587	Actin-binding LIM protein 1 (abLIM-1) (Actin-binding LIM protein family member 1) (Actin-binding double zinc finger protein) (LIMAB1) (Limatin)	ABLIM1 ABLIM KIAA0059 LIMAB1	PDMKRRSSGREEDDE	2.53036	1.56469	2.5	1.74825	1.32193	0.805913	2.53036	1.56469	1.33935	0.645873	3770000	2760000	9430000	1580000	13200000	4340000	7.12057	6.63749	36665	130927
Q13625	1	Apoptosis-stimulating of p53 protein 2 OS=Homo sapiens GN=TP53BP2 PE=1 SV=2 - [ASPP2_HUMAN]	Q13625	S737	Apoptosis-stimulating of p53 protein 2 (Bcl2-binding protein) (Bbp) (Renal carcinoma antigen NY-REN-51) (Tumor suppressor p53-binding protein 2) (53BP2) (p53-binding protein 2) (p53BP2)	TP53BP2 ASPP2 BBP	RPLKKRSSITEPEGP	1.51417	1.93305	1.496	2.15983	0.58111	1.11092	1.51417	1.93305	0.598527	0.950875	8100000	12000000	12100000	5530000	20200000	17530000	7.30535	7.24378	91996	78495
P53367	1	Arfaptin-1 OS=Homo sapiens GN=ARFIP1 PE=1 SV=2 - [ARFP1_HUMAN]	P53367	S132	Arfaptin-1 (ADP-ribosylation factor-interacting protein 1)	ARFIP1	LELVRKWSLNTYKCT	2.02733	2.11085	2.003	2.35849	1.00216	1.23786	2.02733	2.11085	1.01958	1.07782	23600000	47200000	47300000	20000000	70900000	67200000	7.85065	7.82737	40942	145545
O15155	1	BET1 homolog OS=Homo sapiens GN=BET1 PE=1 SV=1 - [BET1_HUMAN]	O15155	S50	BET1 homolog (hBET1) (Golgi vesicular membrane-trafficking protein p18)	BET1	VTAIKSLSIEIGHEV	1.89777	1.73114	1.875	1.93424	0.906891	0.951764	1.89777	1.73114	0.924308	0.791723	3060000	14600000	5740000	7550000	8800000	22150000	6.94448	7.34537	80153	55685
Q9Y5K6	1	CD2-associated protein OS=Homo sapiens GN=CD2AP PE=1 SV=1 - [CD2AP_HUMAN]	Q9Y5K6	S458	CD2-associated protein (Adapter protein CMS) (Cas ligand with multiple SH3 domains)	CD2AP	QLPLRPKSVDFDSLT	1.54757	1.53253	1.529	1.71233	0.612588	0.77596	1.54757	1.53253	0.630005	0.615919	145000000	624000000	222000000	364000000	367000000	988000000	8.56467	8.99476	6375	20476	STE/STE20	MYO3A
P48960	1	CD97 antigen OS=Homo sapiens GN=CD97 PE=1 SV=4 - [CD97_HUMAN]	P48960	S831	CD97 antigen (Leukocyte antigen CD97) (CD antigen CD97) [Cleaved into: CD97 antigen subunit alpha; CD97 antigen subunit beta]	CD97	QTRALRASESGI***	1.52935	1.55113	1.511	1.7331	0.595504	0.793357	1.52935	1.55113	0.612921	0.633316	23100000	16400000	34900000	9450000	58000000	25850000	7.76343	7.41246	4384	27078
Q5SW79	1	Centrosomal protein of 170 kDa OS=Homo sapiens GN=CEP170 PE=1 SV=1 - [CE170_HUMAN]	Q5SW79	T644	Centrosomal protein of 170 kDa (Cep170) (KARP-1-binding protein) (KARP1-binding protein)	CEP170 FAM68A KAB KIAA0470	QGERRRRTLPQLPNE	1.76822	1.82653	1.747	2.04082	0.80488	1.02915	1.76822	1.82653	0.822297	0.869106	1440000	2100000	2520000	1030000	3960000	3130000	6.5977	6.49554	67781	101150
Q14432	1	cGMP-inhibited 3',5'-cyclic phosphodiesterase A OS=Homo sapiens GN=PDE3A PE=1 SV=3 - [PDE3A_HUMAN]	Q14432	S312	cGMP-inhibited 3',5'-cyclic phosphodiesterase A (EC 3.1.4.17) (Cyclic GMP-inhibited phosphodiesterase A) (CGI-PDE A)	PDE3A	SKSHRRTSLPCIPRE	1.85425	1.63024	1.832	1.82149	0.87342	0.865122	1.85425	1.63024	0.890837	0.705082	28100000	66500000	51500000	36500000	79600000	103000000	7.90091	8.01284	40793	60905	AGC/PKA	PKACa, PKACg, PRKX, PRKY
Q14432	1	cGMP-inhibited 3',5'-cyclic phosphodiesterase A OS=Homo sapiens GN=PDE3A PE=1 SV=3 - [PDE3A_HUMAN]	Q14432	T311	cGMP-inhibited 3',5'-cyclic phosphodiesterase A (EC 3.1.4.17) (Cyclic GMP-inhibited phosphodiesterase A) (CGI-PDE A)	PDE3A	SSKSHRRTSLPCIPR	1.7247	1.67917	1.704	1.87617	0.768925	0.907793	1.7247	1.67917	0.786342	0.747752	26500000	79000000	45200000	42100000	71700000	121100000	7.85552	8.08314	82539	60695
O00501	1	Claudin-5 OS=Homo sapiens GN=CLDN5 PE=1 SV=1 - [CLD5_HUMAN]	O00501	T207	Claudin-5 (Transmembrane protein deleted in VCFS) (TMDVCF)	CLDN5 AWAL TMVCF	YSAPRRPTATGDYDK	1.72874	1.91239	1.708	2.13675	0.772308	1.09542	1.72874	1.91239	0.789725	0.935379	56100000	86000000	95900000	40300000	152000000	126300000	8.18184	8.1014	49546	77611
Q99627	1	COP9 signalosome complex subunit 8 OS=Homo sapiens GN=COPS8 PE=1 SV=1 - [CSN8_HUMAN]	Q99627	S175	COP9 signalosome complex subunit 8 (SGN8) (Signalosome subunit 8) (COP9 homolog) (hCOP9) (JAB1-containing signalosome subunit 8)	COPS8 CSN8	VAGALDVSFNKFIPL	1.98279	1.55923	1.959	1.74216	0.970117	0.800877	1.98279	1.55923	0.987534	0.640837	1730000	1660000	3380000	953000	5110000	2613000	6.70842	6.41714	40960	160369
Q13619	1	Cullin-4A OS=Homo sapiens GN=CUL4A PE=1 SV=3 - [CUL4A_HUMAN]	Q13619	S10	Cullin-4A (CUL-4A)	CUL4A	DEAPRKGSFSALVGR	1.61437	1.54844	1.595	1.7301	0.673556	0.790859	1.61437	1.54844	0.690973	0.630818	19600000	40700000	31200000	23500000	50800000	64200000	7.70586	7.80754	40870	60990	CAMK/CAMKL/CHK1	CHK1
Q5VZ89	1	DENN domain-containing protein 4C OS=Homo sapiens GN=DENND4C PE=1 SV=2 - [DEN4C_HUMAN]	Q5VZ89	S1089	DENN domain-containing protein 4C	DENND4C C9orf55 C9orf55B	THKERSTSLSALVRS	1.583	1.54045	1.564	1.72117	0.645241	0.78339	1.583	1.54045	0.662658	0.62335	21600000	34900000	33700000	20300000	55300000	55200000	7.74273	7.74194	5594	28680
Q9Y2H0	1	Disks large-associated protein 4 OS=Homo sapiens GN=DLGAP4 PE=1 SV=3 - [DLGP4_HUMAN]	Q9Y2H0	S973	Disks large-associated protein 4 (DAP-4) (PSD-95/SAP90-binding protein 4) (SAP90/PSD-95-associated protein 4) (SAPAP-4)	DLGAP4 DAP4 KIAA0964 SAPAP4	AASVRQNSATESADS	1.51417	2.55714	1.496	2.85714	0.58111	1.51457	1.51417	2.55714	0.598527	1.35453	4400000	6690000	6590000	2340000	10990000	9030000	7.041	6.95569	102849	106535
Q8TDJ6	1	DmX-like protein 2 OS=Homo sapiens GN=DMXL2 PE=1 SV=1 - [DMXL2_HUMAN]	Q8TDJ6	S1400	DmX-like protein 2 (Rabconnectin-3)	DMXL2 KIAA0856	RHLSRTISVSGSTAK	4.20547	1.98009	4.155	2.21239	2.05485	1.14561	4.20547	1.98009	2.07227	0.985565	5280000	42800000	21900000	19400000	27180000	62200000	7.43425	7.79379	3473	113598
Q8NDI1	1	EH domain-binding protein 1 OS=Homo sapiens GN=EHBP1 PE=1 SV=2 - [EHBP1_HUMAN]	Q8NDI1	S171	EH domain-binding protein 1	EHBP1 KIAA0903 NACSIN	ATDEDMQSLASLMSM	1.68826	1.71456	1.668	1.91571	0.738119	0.937878	1.68826	1.71456	0.755536	0.777838	2610000	1000000	4350000	522000	6960000	1522000	6.84261	6.18241	20826	96924	Other/IKK	IKKa
Q8NDI1	1	EH domain-binding protein 1 OS=Homo sapiens GN=EHBP1 PE=1 SV=2 - [EHBP1_HUMAN]	Q8NDI1	S174	EH domain-binding protein 1	EHBP1 KIAA0903 NACSIN	EDMQSLASLMSMKQA	1.68826	1.71456	1.668	1.91571	0.738119	0.937878	1.68826	1.71456	0.755536	0.777838	2610000	1000000	4350000	522000	6960000	1522000	6.84261	6.18241	20826	96924
Q5T1M5	1	FK506-binding protein 15 OS=Homo sapiens GN=FKBP15 PE=1 SV=2 - [FKB15_HUMAN]	Q5T1M5	S346	FK506-binding protein 15 (FKBP-15) (133 kDa FK506-binding protein) (133 kDa FKBP) (FKBP-133) (WASP and FKBP-like) (WAFL)	FKBP15 KIAA0674	ALRTKSNSLSEQLAI	2.24393	1.55382	2.217	1.73611	1.14861	0.795859	2.24393	1.55382	1.16603	0.635819	10500000	38100000	23200000	22000000	33700000	60100000	7.52763	7.77887	68116	15355
O14558	1	Heat shock protein beta-6 OS=Homo sapiens GN=HSPB6 PE=1 SV=2 - [HSPB6_HUMAN]	O14558	S16	Heat shock protein beta-6 (HspB6) (Heat shock 20 kDa-like protein p20)	HSPB6	PSWLRRASAPLPGLS	1.53036	1.77932	1.512	1.98807	0.596458	0.99137	1.53036	1.77932	0.613875	0.831329	4520000	12400000	6830000	6250000	11350000	18650000	7.055	7.27068	40839	60941
Q9H910	1	Hematological and neurological expressed 1-like protein OS=Homo sapiens GN=HN1L PE=1 SV=1 - [HN1L_HUMAN]	Q9H910	S132	Hematological and neurological expressed 1-like protein (HN1-like protein)	HN1L C16orf34 L11	SDLKAARSIPAGAEP	1.84818	1.94143	1.826	2.1692	0.868687	1.11716	1.84818	1.94143	0.886104	0.957121	1750000	3870000	3190000	1780000	4940000	5650000	6.69373	6.75205	66522	99870
P52272	1	Heterogeneous nuclear ribonucleoprotein M OS=Homo sapiens GN=HNRNPM PE=1 SV=3 - [HNRPM_HUMAN]	P52272	S528	Heterogeneous nuclear ribonucleoprotein M (hnRNP M)	HNRNPM HNRPM NAGR1	AIERMGLSMERMVPA	2.03441	1.77228	2.01	1.9802	1.0072	0.985645	2.03441	1.77228	1.02461	0.825604	23700000	320000000	47500000	161000000	71200000	481000000	7.85248	8.68215	70737	23640
P52272	1	Heterogeneous nuclear ribonucleoprotein M OS=Homo sapiens GN=HNRNPM PE=1 SV=3 - [HNRPM_HUMAN]	P52272	S633	Heterogeneous nuclear ribonucleoprotein M (hnRNP M)	HNRNPM HNRPM NAGR1	ERGNFGGSFAGSFGG	1.75	1.60107	1.729	1.78891	0.789938	0.83908	1.75	1.60107	0.807355	0.679039	58100000	121000000	100000000	67800000	158100000	188800000	8.19893	8.276	38240	56052	STE/STE11	MAP3K1
P52272	1	Heterogeneous nuclear ribonucleoprotein M OS=Homo sapiens GN=HNRNPM PE=1 SV=3 - [HNRPM_HUMAN]	P52272	S637	Heterogeneous nuclear ribonucleoprotein M (hnRNP M)	HNRNPM HNRPM NAGR1	FGGSFAGSFGGAGGH	1.82591	1.7278	1.804	1.9305	0.851199	0.948976	1.82591	1.7278	0.868616	0.788936	31900000	67600000	57500000	35000000	89400000	102600000	7.95134	8.01115	80217	55955	STE/STE11	MAP3K1
P22626	1	Heterogeneous nuclear ribonucleoproteins A2/B1 OS=Homo sapiens GN=HNRNPA2B1 PE=1 SV=2 - [ROA2_HUMAN]	P22626	S212	Heterogeneous nuclear ribonucleoproteins A2/B1 (hnRNP A2/B1)	HNRNPA2B1 HNRPA2B1	GNFGFGDSRGGGGNF	1.94737	2.04805	1.924	2.28833	0.944109	1.19429	1.94737	2.04805	0.961526	1.03425	35400000	5400000	68000000	2360000	103400000	7760000	8.01452	6.88986	38317	110231
P35367	1	Histamine H1 receptor OS=Homo sapiens GN=HRH1 PE=2 SV=1 - [HRH1_HUMAN]	P35367	S380	Histamine H1 receptor (H1R) (HH1R)	HRH1	KGKLRSGSNTGLDYI	3.40992	2.98333	3.369	3.33333	1.75232	1.73697	3.40992	2.98333	1.76974	1.57693	875000	6330000	2950000	1900000	3825000	8230000	6.58263	6.9154	41025	117466	CAMK/PKD	PKD1
O60381	1	HMG box-containing protein 1 OS=Homo sapiens GN=HBP1 PE=1 SV=2 - [HBP1_HUMAN]	O60381	S380	HMG box-containing protein 1 (HMG box transcription factor 1) (High mobility group box transcription factor 1)	HBP1	MARQRRASLSCGGPG	1.60425	1.50927	1.585	1.68634	0.664483	0.753896	1.60425	1.50927	0.6819	0.593856	6830000	7480000	10800000	4440000	17630000	11920000	7.24625	7.07628	40158	60469
P39880	1	Homeobox protein cut-like 1 OS=Homo sapiens GN=CUX1 PE=1 SV=2 - [CUX1_HUMAN]	P39880	S1270	Homeobox protein cut-like 1 (CCAAT displacement protein) (CDP) (Homeobox protein cux-1)	CUX1 CUTL1	YQQKPYPSPKTIEDL	1.78846	2.85942	1.767	3.19489	0.821302	1.67577	1.78846	2.85942	0.838719	1.51573	3850000	3660000	6800000	1150000	10650000	4810000	7.02735	6.68215	52491	83505	TKL/IRAK	IRAK2
Q9NSC5	1	Homer protein homolog 3 OS=Homo sapiens GN=HOMER3 PE=1 SV=2 - [HOME3_HUMAN]	Q9NSC5	S159	Homer protein homolog 3 (Homer-3)	HOMER3	EKLFRSQSADAPGPT	1.91296	1.65129	1.89	1.84502	0.918386	0.883635	1.91296	1.65129	0.935803	0.723595	11200000	24700000	21100000	13400000	32300000	38100000	7.5092	7.58092	7202	112248	CAMK/CAMK2	CaMK2g
O75146	1	Huntingtin-interacting protein 1-related protein OS=Homo sapiens GN=HIP1R PE=1 SV=2 - [HIP1R_HUMAN]	O75146	S1045	Huntingtin-interacting protein 1-related protein (HIP1-related protein) (Huntingtin-interacting protein 12) (HIP-12)	HIP1R HIP12 KIAA0655	PPLAQKPSVAPRQDH	2.44838	2.36772	2.419	2.6455	1.27441	1.40354	2.44838	2.36772	1.29183	1.2435	8560000	30900000	20700000	11700000	29260000	42600000	7.46627	7.62941	47584	165332
Q15111	1	Inactive phospholipase C-like protein 1 OS=Homo sapiens GN=PLCL1 PE=1 SV=2 - [PLCL1_HUMAN]	Q15111	S77	Inactive phospholipase C-like protein 1 (PLC-L1) (Phospholipase C-deleted in lung carcinoma) (Phospholipase C-related but catalytically inactive protein) (PRIP)	PLCL1	RATPRRSSIIKDPSN	1.52024	1.56469	1.502	1.74825	0.586885	0.805913	1.52024	1.56469	0.604302	0.645873	20600000	12600000	30900000	7210000	51500000	19810000	7.71181	7.29688	89060	77993
Q14573	1	Inositol 1,4,5-trisphosphate receptor type 3 OS=Homo sapiens GN=ITPR3 PE=1 SV=1 - [ITPR3_HUMAN]	Q14573	S1832	Inositol 1,4,5-trisphosphate receptor type 3 (IP3 receptor isoform 3) (IP3R 3) (InsP3R3) (Type 3 inositol 1,4,5-trisphosphate receptor) (Type 3 InsP3 receptor)	ITPR3	TTKGRVASFSIPGSS	1.5081	1.62432	1.49	1.81488	0.575312	0.859876	1.5081	1.62432	0.592729	0.699835	96900000	88600000	144000000	48900000	240900000	137500000	8.38184	8.1383	5544	28588	AGC/AKT	AKT1
Q14678	1	KN motif and ankyrin repeat domain-containing protein 1 OS=Homo sapiens GN=KANK1 PE=2 SV=3 - [KANK1_HUMAN]	Q14678	S186	KN motif and ankyrin repeat domain-containing protein 1 (Ankyrin repeat domain-containing protein 15) (Kidney ankyrin repeat-containing protein)	KANK1 ANKRD15 KANK KIAA0172	FRRPRLASFGGMGTT	1.65688	1.75835	1.637	1.96464	0.711054	0.974262	1.65688	1.75835	0.728471	0.814222	13600000	48200000	22300000	24500000	35900000	72700000	7.55509	7.86153	76782	125830
Q63ZY3	1	KN motif and ankyrin repeat domain-containing protein 2 OS=Homo sapiens GN=KANK2 PE=1 SV=1 - [KANK2_HUMAN]	Q63ZY3	S540	KN motif and ankyrin repeat domain-containing protein 2 (Ankyrin repeat domain-containing protein 25) (Matrix-remodeling-associated protein 3) (SRC-1-interacting protein) (SRC1-interacting protein)	KANK2 ANKRD25 KIAA1518 MXRA3 SIP	EPRERVPSVAEAPQL	1.71053	1.77932	1.69	1.98807	0.757023	0.99137	1.71053	1.77932	0.77444	0.831329	11200000	17300000	19000000	8670000	30200000	25970000	7.48001	7.41447	43631	66542
Q86V48	1	Leucine zipper protein 1 OS=Homo sapiens GN=LUZP1 PE=1 SV=2 - [LUZP1_HUMAN]	Q86V48	S957	Leucine zipper protein 1	LUZP1	NAYTQRSSTDFSELE	1.81174	1.79	1.79	2	0.83996	1	1.81174	1.79	0.857377	0.83996	62900000	38400000	113000000	19200000	175900000	57600000	8.24527	7.76042	5254	117694
Q8WWI1	1	LIM domain only protein 7 OS=Homo sapiens GN=LMO7 PE=1 SV=2 - [LMO7_HUMAN]	Q8WWI1	S1493	LIM domain only protein 7 (LMO-7) (F-box only protein 20) (LOMP)	LMO7 FBX20 FBXO20 KIAA0858	WIRQRSASVNKEPVS	1.63259	1.65129	1.613	1.84502	0.689746	0.883635	1.63259	1.65129	0.707163	0.723595	30300000	89200000	48800000	48300000	79100000	137500000	7.89818	8.1383	34100	48569	AGC/AKT	AKT1
Q8WWI1	1	LIM domain only protein 7 OS=Homo sapiens GN=LMO7 PE=1 SV=2 - [LMO7_HUMAN]	Q8WWI1	S751	LIM domain only protein 7 (LMO-7) (F-box only protein 20) (LOMP)	LMO7 FBX20 FBXO20 KIAA0858	KWKDRRKSYTSDLQK	1.71356	2.11085	1.693	2.35849	0.759582	1.23786	1.71356	2.11085	0.776999	1.07782	7180000	10600000	12200000	4480000	19380000	15080000	7.28735	7.1784	66537	99915	AGC/AKT	AKT1
Q3KQU3	1	MAP7 domain-containing protein 1 OS=Homo sapiens GN=MAP7D1 PE=1 SV=1 - [MA7D1_HUMAN]	Q3KQU3	S442	MAP7 domain-containing protein 1 (Arginine/proline-rich coiled-coil domain-containing protein 1) (Proline/arginine-rich coiled-coil domain-containing protein 1)	MAP7D1 KIAA1187 PARCC1 RPRC1 PP2464	RSLKKRQSLPASPRA	1.60628	1.98448	1.587	2.21729	0.666302	1.1488	1.60628	1.98448	0.683719	0.98876	2220000	1990000	3530000	898000	5750000	2888000	6.75967	6.4606	54550	85582
P27816	1	Microtubule-associated protein 4 OS=Homo sapiens GN=MAP4 PE=1 SV=2 - [MAP4_HUMAN]	P27816	S1000	Microtubule-associated protein 4 (MAP-4)	MAP4	QIVSKKVSYSHIQSK	1.7753	1.92473	1.754	2.15054	0.810649	1.1047	1.7753	1.92473	0.828066	0.944657	5280000	13300000	9250000	6180000	14530000	19480000	7.16227	7.28959	47494	78042	CAMK/CAMKL	MARK1, MARK2, MARK3, MARK4
Q9P2K5	1	Myelin expression factor 2 OS=Homo sapiens GN=MYEF2 PE=1 SV=2 - [MYEF2_HUMAN]	Q9P2K5	S431	Myelin expression factor 2 (MEF-2) (MyEF-2) (MST156)	MYEF2 KIAA1341	INRGFGDSFGRLGSA	2.1498	2.20443	2.124	2.46305	1.08678	1.30045	2.1498	2.20443	1.1042	1.14041	45400000	27000000	96400000	11000000	141800000	38000000	8.15168	7.57978	4895	116920
Q13459	1	Myosin-IXb OS=Homo sapiens GN=MYO9B PE=1 SV=2 - [MYO9B_HUMAN]	Q13459	S1354	Unconventional myosin-IXb (Unconventional myosin-9b)	MYO9B MYR5	PTEERRTSFSTSDVS	1.71053	1.75147	1.69	1.95695	0.757023	0.968605	1.71053	1.75147	0.77444	0.808564	12000000	26900000	20300000	13700000	32300000	40600000	7.5092	7.60853	39927	60026
Q13459	1	Myosin-IXb OS=Homo sapiens GN=MYO9B PE=1 SV=2 - [MYO9B_HUMAN]	Q13459	T1353	Unconventional myosin-IXb (Unconventional myosin-9b)	MYO9B MYR5	TPTEERRTSFSTSDV	1.68522	1.69829	1.665	1.89753	0.735522	0.924125	1.68522	1.69829	0.752939	0.764085	79900000	108000000	133000000	57000000	212900000	165000000	8.32818	8.21748	81704	144257
Q09666	1	Neuroblast differentiation-associated protein AHNAK OS=Homo sapiens GN=AHNAK PE=1 SV=2 - [AHNK_HUMAN]	Q09666	S135	Neuroblast differentiation-associated protein AHNAK (Desmoyokin)	AHNAK PM227	KIKPRLKSEDGVEGD	1.52227	1.5247	1.504	1.70358	0.588805	0.768568	1.52227	1.5247	0.606222	0.608527	1200000000	1410000000	1810000000	829000000	3010000000	2239000000	9.47857	9.35005	36588	51578	Other/CK2	CK2a2
Q8NEY1	1	Neuron navigator 1 OS=Homo sapiens GN=NAV1 PE=1 SV=2 - [NAV1_HUMAN]	Q8NEY1	S648	Neuron navigator 1 (Pore membrane and/or filament-interacting-like protein 3) (Steerin-1) (Unc-53 homolog 1) (unc53H1)	NAV1 KIAA1151 KIAA1213 POMFIL3 STEERIN1	PVNGRKTSLDVSNSA	1.60628	1.68868	1.587	1.88679	0.666302	0.915936	1.60628	1.68868	0.683719	0.755895	31200000	35700000	49400000	18900000	80600000	54600000	7.90634	7.73719	76505	55958
Q5SYE7	1	NHS-like protein 1 OS=Homo sapiens GN=NHSL1 PE=1 SV=2 - [NHSL1_HUMAN]	Q5SYE7	S1089	NHS-like protein 1	NHSL1 C6orf63 KIAA1357	LRPVRKNSGAEAAQL	1.70344	2.09112	1.683	2.33645	0.751035	1.22432	1.70344	2.09112	0.768452	1.06428	16100000	3340000	27100000	1430000	43200000	4770000	7.63548	6.67852	39544	158990
Q5HYW2	1	NHS-like protein 2 OS=Homo sapiens GN=NHSL2 PE=2 SV=1 - [NHSL2_HUMAN]	Q5HYW2	S192	NHS-like protein 2	NHSL2	HRRQRSKSISLRKAK	1.83198	1.78287	1.81	1.99203	0.85599	0.994241	1.83198	1.78287	0.873407	0.8342	2390000	3220000	4320000	1620000	6710000	4840000	6.82672	6.68485	52492	83506
P29474	1	Nitric oxide synthase, endothelial OS=Homo sapiens GN=NOS3 PE=1 SV=3 - [NOS3_HUMAN]	P29474	S1177	Nitric oxide synthase, endothelial (EC 1.14.13.39) (Constitutive NOS) (cNOS) (EC-NOS) (Endothelial NOS) (eNOS) (NOS type III) (NOSIII)	NOS3	TSRIRTQSFSLQERQ	1.71559	1.58127	1.695	1.76678	0.761285	0.821126	1.71559	1.58127	0.778702	0.661086	107000000	259000000	181000000	147000000	288000000	406000000	8.45939	8.60853	105323	27432	AGC/AKT	AKT1, AKT2, AKT3
P29474	1	Nitric oxide synthase, endothelial OS=Homo sapiens GN=NOS3 PE=1 SV=3 - [NOS3_HUMAN]	P29474	S615	Nitric oxide synthase, endothelial (EC 1.14.13.39) (Constitutive NOS) (cNOS) (EC-NOS) (Endothelial NOS) (eNOS) (NOS type III) (NOSIII)	NOS3	SYKIRFNSISCSDPL	1.84514	2.33681	1.823	2.61097	0.866315	1.38458	1.84514	2.33681	0.883732	1.22454	7350000	9460000	13400000	3620000	20750000	13080000	7.31702	7.11661	41963	111487	TKL/STKR	BMPR1A, BMPR2, TGFbR1
P29474	1	Nitric oxide synthase, endothelial OS=Homo sapiens GN=NOS3 PE=1 SV=3 - [NOS3_HUMAN]	P29474	T1175	Nitric oxide synthase, endothelial (EC 1.14.13.39) (Constitutive NOS) (cNOS) (EC-NOS) (Endothelial NOS) (eNOS) (NOS type III) (NOSIII)	NOS3	EVTSRIRTQSFSLQE	1.68421	1.60394	1.664	1.79211	0.734655	0.841663	1.68421	1.60394	0.752072	0.681623	84100000	176000000	140000000	98000000	224100000	274000000	8.35044	8.43775	70614	23513	CAMK/CAMKL/CHK1	CHK1
Q9NXR1	1	Nuclear distribution protein nudE homolog 1 OS=Homo sapiens GN=NDE1 PE=1 SV=2 - [NDE1_HUMAN]	Q9NXR1	S306	Nuclear distribution protein nudE homolog 1 (NudE)	NDE1 NUDE	DGGERRPSSTSVPLG	1.51417	2.06221	1.496	2.30415	0.58111	1.20423	1.51417	2.06221	0.598527	1.04419	16200000	15900000	24300000	6880000	40500000	22780000	7.60746	7.35755	45230	68234	AGC/PKA	PKACa, PKACg
Q9NXR1	1	Nuclear distribution protein nudE homolog 1 OS=Homo sapiens GN=NDE1 PE=1 SV=2 - [NDE1_HUMAN]	Q9NXR1	S309	Nuclear distribution protein nudE homolog 1 (NudE)	NDE1 NUDE	ERRPSSTSVPLGDKG	1.91903	1.5757	1.896	1.76056	0.922959	0.816037	1.91903	1.5757	0.940376	0.655997	13400000	18300000	25300000	10400000	38700000	28700000	7.58771	7.45788	39721	59777
Q49A26	1	Nuclear protein NP60 OS=Homo sapiens GN=NP60 PE=1 SV=2 - [NP60_HUMAN]	Q49A26	S130	Putative oxidoreductase GLYR1 (EC 1.-.-.-) (3-hydroxyisobutyrate dehydrogenase-like protein) (Cytokine-like nuclear factor N-PAC) (Glyoxylate reductase 1 homolog) (Nuclear protein NP60) (Nuclear protein of 60 kDa)	GLYR1 HIBDL NP60	GDEKRKLSLSEGKVK	1.57895	1.53516	1.56	1.71527	0.641546	0.778432	1.57895	1.53516	0.658963	0.618392	855000	6960000	1330000	4060000	2185000	11020000	6.33945	7.04218	54865	83339
Q8N573	1	Oxidation resistance protein 1 OS=Homo sapiens GN=OXR1 PE=1 SV=1 - [OXR1_HUMAN]	Q8N573	S112	Oxidation resistance protein 1	OXR1 Nbla00307	IRPARVVSSTSEEEE	1.5081	1.79	1.49	2	0.575312	1	1.5081	1.79	0.592729	0.83996	2700000	8250000	4020000	4120000	6720000	12370000	6.82737	7.09237	67610	104794	AGC/AKT	AKT1
Q9BXB4	1	Oxysterol-binding protein-related protein 11 OS=Homo sapiens GN=OSBPL11 PE=1 SV=2 - [OSB11_HUMAN]	Q9BXB4	S189	Oxysterol-binding protein-related protein 11 (ORP-11) (OSBP-related protein 11)	OSBPL11 ORP11 OSBP12	PISQRRPSQNAISFF	1.5668	2.14115	1.548	2.39234	0.630405	1.25843	1.5668	2.14115	0.647823	1.09838	75400000	267000000	117000000	112000000	192400000	379000000	8.28421	8.57864	49279	74450
Q15154	1	Pericentriolar material 1 protein OS=Homo sapiens GN=PCM1 PE=1 SV=2 - [PCM1_HUMAN]	Q15154	S384	Pericentriolar material 1 protein (PCM-1) (hPCM-1)	PCM1	VSQSRKPSASERLPD	1.86032	1.61844	1.838	1.80832	0.878137	0.854649	1.86032	1.61844	0.895554	0.694608	10800000	17900000	19800000	9920000	30600000	27820000	7.48572	7.44436	89143	72719
Q93100	1	Phosphorylase b kinase regulatory subunit beta OS=Homo sapiens GN=PHKB PE=1 SV=3 - [KPBB_HUMAN]	Q93100	S27	Phosphorylase b kinase regulatory subunit beta (Phosphorylase kinase subunit beta)	PHKB	ARTKRSGSVYEPLKS	1.58603	1.83402	1.567	2.04918	0.648005	1.03505	1.58603	1.83402	0.665422	0.875007	19500000	35300000	30600000	17200000	50100000	52500000	7.69984	7.72016	40134	144755	AGC/PKG	PKG1
O94827	1	Pleckstrin homology domain-containing family G member 5 OS=Homo sapiens GN=PLEKHG5 PE=2 SV=3 - [PKHG5_HUMAN]	O94827	S249	Pleckstrin homology domain-containing family G member 5 (PH domain-containing family G member 5) (Guanine nucleotide exchange factor 720) (GEF720)	PLEKHG5 KIAA0720	DAQSRRESLDILAPG	1.56984	1.90021	1.551	2.12314	0.633199	1.0862	1.56984	1.90021	0.650616	0.926161	2720000	7900000	4220000	3720000	6940000	11620000	6.84136	7.06521	51393	79425	Other/AUR/AUR-B	AurB
Q86UU1	1	Pleckstrin homology-like domain family B member 1 OS=Homo sapiens GN=PHLDB1 PE=1 SV=1 - [PHLB1_HUMAN]	Q86UU1	S430	Pleckstrin homology-like domain family B member 1 (Protein LL5-alpha)	PHLDB1 KIAA0638 LL5A DLNB07	QLVGRTFSDGLATRT	2.09413	1.71128	2.069	1.91205	1.04893	0.935117	2.09413	1.71128	1.06635	0.775077	14100000	56800000	29100000	29800000	43200000	86600000	7.63548	7.93752	105321	27417	CAMK/CAMKL	QIK
Q86UU1	1	Pleckstrin homology-like domain family B member 1 OS=Homo sapiens GN=PHLDB1 PE=1 SV=1 - [PHLB1_HUMAN]	Q86UU1	S578	Pleckstrin homology-like domain family B member 1 (Protein LL5-alpha)	PHLDB1 KIAA0638 LL5A DLNB07	VTRERKNSITEISDN	2.1417	2.17233	2.116	2.42718	1.08134	1.27928	2.1417	2.17233	1.09876	1.11924	729000	2820000	1540000	1160000	2269000	3980000	6.35583	6.59988	46457	88767
Q86SQ0	1	Pleckstrin homology-like domain family B member 2 OS=Homo sapiens GN=PHLDB2 PE=1 SV=2 - [PHLB2_HUMAN]	Q86SQ0	S212	Pleckstrin homology-like domain family B member 2 (Protein LL5-beta)	PHLDB2 LL5B	PKQARKMSIQDSLAL	1.77632	1.74464	1.755	1.94932	0.811471	0.962969	1.77632	1.74464	0.828888	0.802929	4280000	46700000	7510000	23900000	11790000	70600000	7.07151	7.8488	80191	55141
Q86SQ0	1	Pleckstrin homology-like domain family B member 2 OS=Homo sapiens GN=PHLDB2 PE=1 SV=2 - [PHLB2_HUMAN]	Q86SQ0	S468	Pleckstrin homology-like domain family B member 2 (Protein LL5-beta)	PHLDB2 LL5B	TKPDSRLSTGTTVED	1.71255	1.61552	1.692	1.80505	0.75873	0.852042	1.71255	1.61552	0.776147	0.692002	1620000	5530000	2750000	3060000	4370000	8590000	6.64048	6.93399	25043	103956
Q15751	1	Probable E3 ubiquitin-protein ligase HERC1 OS=Homo sapiens GN=HERC1 PE=1 SV=1 - [HERC1_HUMAN]	Q15751	S2720	Probable E3 ubiquitin-protein ligase HERC1 (EC 6.3.2.-) (HECT domain and RCC1-like domain-containing protein 1) (p532) (p619)	HERC1	DEVGRRQSLTSPDSQ	1.70648	2.40591	1.686	2.68817	0.753605	1.42663	1.70648	2.40591	0.771022	1.26659	16200000	8470000	27300000	3150000	43500000	11620000	7.63849	7.06521	91489	168423
Q96B36	1	Proline-rich AKT1 substrate 1 OS=Homo sapiens GN=AKT1S1 PE=1 SV=1 - [AKTS1_HUMAN]	Q96B36	T246	Proline-rich AKT1 substrate 1 (40 kDa proline-rich AKT substrate)	AKT1S1 PRAS40	LPRPRLNTSDFQKLK	1.57895	1.57848	1.56	1.76367	0.641546	0.818579	1.57895	1.57848	0.658963	0.658539	1310000000	933000000	2050000000	529000000	3360000000	1462000000	9.52634	9.16495	4109	26809	AGC/SGK	SGK1
Q86UE4	1	Protein LYRIC OS=Homo sapiens GN=MTDH PE=1 SV=2 - [LYRIC_HUMAN]	Q86UE4	S339	Protein LYRIC (3D3/LYRIC) (Astrocyte elevated gene-1 protein) (AEG-1) (Lysine-rich CEACAM1 co-isolated protein) (Metadherin) (Metastasis adhesion protein)	MTDH AEG1 LYRIC	NGKDWGRSWSDRSIF	1.71559	1.72447	1.695	1.92678	0.761285	0.946194	1.71559	1.72447	0.778702	0.786153	14200000	4030000	24000000	2090000	38200000	6120000	7.58206	6.78675	41109	145671
Q8TB72	1	Pumilio homolog 2 OS=Homo sapiens GN=PUM2 PE=1 SV=2 - [PUM2_HUMAN]	Q8TB72	S587	Pumilio homolog 2 (Pumilio-2)	PUM2 KIAA0235 PUMH2	SSATRRESLSTSSDL	1.94433	1.84536	1.921	2.06186	0.941858	1.04394	1.94433	1.84536	0.959275	0.883903	23000000	67500000	44200000	32800000	67200000	100300000	7.82737	8.0013	36356	134777
Q5U651	1	Ras-interacting protein 1 OS=Homo sapiens GN=RASIP1 PE=1 SV=1 - [RAIN_HUMAN]	Q5U651	S331	Ras-interacting protein 1 (Rain)	RASIP1	RRSVSELSLQGRRRR	1.72773	1.60394	1.707	1.79211	0.771463	0.841663	1.72773	1.60394	0.78888	0.681623	279000000	225000000	476000000	126000000	755000000	351000000	8.87795	8.54531	4673	27370
Q5U651	1	Ras-interacting protein 1 OS=Homo sapiens GN=RASIP1 PE=1 SV=1 - [RAIN_HUMAN]	Q5U651	S44	Ras-interacting protein 1 (Rain)	RASIP1	RRWPSAASVKSSSSD	2.333	2.70393	2.305	3.02115	1.20477	1.5951	2.333	2.70393	1.22218	1.43506	28900000	68900000	66600000	22800000	95500000	91700000	7.98	7.96237	4785	23570
Q5U651	1	Ras-interacting protein 1 OS=Homo sapiens GN=RASIP1 PE=1 SV=1 - [RAIN_HUMAN]	Q5U651	S47	Ras-interacting protein 1 (Rain)	RASIP1	PSAASVKSSSSDTGS	2.33502	3.36466	2.307	3.7594	1.20602	1.9105	2.33502	3.36466	1.22344	1.75046	8030000	24900000	18500000	6640000	26530000	31540000	7.42374	7.49886	70765	23384
Q5U651	1	Ras-interacting protein 1 OS=Homo sapiens GN=RASIP1 PE=1 SV=1 - [RAIN_HUMAN]	Q5U651	S50	Ras-interacting protein 1 (Rain)	RASIP1	ASVKSSSSDTGSRSS	2.33502	3.36466	2.307	3.7594	1.20602	1.9105	2.33502	3.36466	1.22344	1.75046	8030000	24900000	18500000	6640000	26530000	31540000	7.42374	7.49886	70765	23384
Q8IUW5	1	RELT-like protein 1 OS=Homo sapiens GN=RELL1 PE=1 SV=1 - [RELL1_HUMAN]	Q8IUW5	S244	RELT-like protein 1	RELL1 PSEC0162	SNQKERRSLMSVSGA	2.14676	1.63919	2.121	1.8315	1.08474	0.873027	2.14676	1.63919	1.10216	0.712987	1150000	7250000	2450000	3960000	3600000	11210000	6.5563	7.04961	64546	45132	STE/STE20	OSR1
Q52LW3	1	Rho GTPase-activating protein 29 OS=Homo sapiens GN=ARHGAP29 PE=1 SV=2 - [RHG29_HUMAN]	Q52LW3	S1144	Rho GTPase-activating protein 29 (PTPL1-associated RhoGAP protein 1) (Rho-type GTPase-activating protein 29)	ARHGAP29 PARG1	EASERRSSDSYPLAP	1.85628	1.80808	1.834	2.0202	0.874994	1.0145	1.85628	1.80808	0.892411	0.854459	16000000	20400000	29300000	10100000	45300000	30500000	7.6561	7.4843	82465	60611	AGC/AKT	AKT1
A7KAX9	1	Rho/Cdc42/Rac GTPase-activating protein RICS OS=Homo sapiens GN=RICS PE=1 SV=1 - [RICS_HUMAN]	A7KAX9	S587	Rho GTPase-activating protein 32 (Brain-specific Rho GTPase-activating protein) (GAB-associated Cdc42/Rac GTPase-activating protein) (GC-GAP) (GTPase regulator interacting with TrkA) (Rho-type GTPase-activating protein 32) (Rho/Cdc42/Rac GTPase-activating protein RICS) (RhoGAP involved in the beta-catenin-N-cadherin and NMDA receptor signaling) (p200RhoGAP) (p250GAP)	ARHGAP32 GRIT KIAA0712 RICS	ASLSRPKSLLVSSPS	2.02935	1.74464	2.005	1.94932	1.0036	0.962969	2.02935	1.74464	1.02102	0.802929	380000	3160000	763000	1620000	1143000	4780000	6.05805	6.67943	25158	17936
O75116	1	Rho-associated protein kinase 2 OS=Homo sapiens GN=ROCK2 PE=1 SV=3 - [ROCK2_HUMAN]	O75116	S1379	Rho-associated protein kinase 2 (EC 2.7.11.1) (Rho kinase 2) (Rho-associated, coiled-coil-containing protein kinase 2) (Rho-associated, coiled-coil-containing protein kinase II) (ROCK-II) (p164 ROCK-2)	ROCK2 KIAA0619	NQSIRRPSRQLAPNK	1.60628	1.94143	1.587	2.1692	0.666302	1.11716	1.60628	1.94143	0.683719	0.957121	7880000	8610000	12500000	3970000	20380000	12580000	7.3092	7.09968	91436	77659
Q9HBD1	1	Ring finger and CCCH-type zinc finger domain-containing protein 2 OS=Homo sapiens GN=RC3H2 PE=1 SV=2 - [RC3H2_HUMAN]	Q9HBD1	S982	RING finger and CCCH-type zinc finger domain-containing protein 2 (Membrane-associated nucleic acid-binding protein) (RING finger protein 164)	RC3H2 MNAB RNF164	LSGHRKHSSTGDLLS	1.80466	1.88025	1.783	2.10084	0.834307	1.07097	1.80466	1.88025	0.851724	0.910926	288000	2140000	514000	1020000	802000	3160000	5.90417	6.49969	90945	77175
Q96PK6	1	RNA-binding protein 14 OS=Homo sapiens GN=RBM14 PE=1 SV=2 - [RBM14_HUMAN]	Q96PK6	S620	RNA-binding protein 14 (Paraspeckle protein 2) (PSP2) (RNA-binding motif protein 14) (RRM-containing coactivator activator/modulator) (Synaptotagmin-interacting protein) (SYT-interacting protein)	RBM14 SIP	DYRRLSESQLSFRRS	2.01113	1.91239	1.987	2.13675	0.990592	1.09542	2.01113	1.91239	1.00801	0.935379	34100000	27600000	67800000	12900000	101900000	40500000	8.00817	7.60746	5953	111088
O94885	1	SAM and SH3 domain-containing protein 1 OS=Homo sapiens GN=SASH1 PE=1 SV=3 - [SASH1_HUMAN]	O94885	S743	SAM and SH3 domain-containing protein 1 (Proline-glutamate repeat-containing protein)	SASH1 KIAA0790 PEPE1	NGKTRKASLLSAKSS	2.07186	2.11085	2.047	2.35849	1.03351	1.23786	2.07186	2.11085	1.05093	1.07782	2860000	19000000	5850000	8060000	8710000	27060000	6.94002	7.43233	39996	59874
Q9Y2K2	1	Serine/threonine-protein kinase QSK OS=Homo sapiens GN=QSK PE=1 SV=3 - [QSK_HUMAN]	Q9Y2K2	S808	Serine/threonine-protein kinase SIK3 (EC 2.7.11.1) (Salt-inducible kinase 3) (SIK-3) (Serine/threonine-protein kinase QSK)	SIK3 KIAA0999 QSK L19	RPLSKQLSADSAEAH	1.57287	1.86848	1.554	2.08768	0.635987	1.0619	1.57287	1.86848	0.653404	0.901862	17900000	14800000	27800000	7070000	45700000	21870000	7.65992	7.33985	78706	51628	CAMK/CAMKL	BRSK1, BRSK2, MARK2, MARK3, MARK4, MELK, NuaK1, NuaK2, QIK
Q5VZ18	1	SH2 domain-containing adapter protein E OS=Homo sapiens GN=SHE PE=2 SV=1 - [SHE_HUMAN]	Q5VZ18	S69	SH2 domain-containing adapter protein E	SHE	GGKLRKNSEAGGAGP	1.6002	2.14628	1.581	2.39808	0.660837	1.26188	1.6002	2.14628	0.678254	1.10184	18200000	30100000	28800000	12600000	47000000	42700000	7.6721	7.63043	49656	168023	AGC/AKT	AKT1
Q9P0V3	1	SH3 domain-binding protein 4 OS=Homo sapiens GN=SH3BP4 PE=1 SV=1 - [SH3B4_HUMAN]	Q9P0V3	S279	SH3 domain-binding protein 4 (EH-binding protein 10) (Transferrin receptor-trafficking protein)	SH3BP4 BOG25 EHB10 TTP	PAPEQFQSREDFRTA	1.5668	1.60394	1.548	1.79211	0.630405	0.841663	1.5668	1.60394	0.647823	0.681623	70600000	75000000	109000000	41800000	179600000	116800000	8.25431	8.06744	36703	51717
O00193	1	Small acidic protein OS=Homo sapiens GN=SMAP PE=1 SV=1 - [SMAP_HUMAN]	O00193	S87	Small acidic protein	SMAP C11orf58	LESQYQQSMDSKLSG	2.20749	1.70476	2.181	1.90476	1.12499	0.929611	2.20749	1.70476	1.14241	0.76957	6910000	10800000	15100000	5670000	22010000	16470000	7.34262	7.21669	40123	60425
P28290	1	Sperm-specific antigen 2 OS=Homo sapiens GN=SSFA2 PE=1 SV=3 - [SSFA2_HUMAN]	P28290	S593	Sperm-specific antigen 2 (Cleavage signal-1 protein) (CS-1) (Ki-ras-induced actin-interacting protein)	SSFA2 CS1 KIAA1927 KRAP	ADKRKSGSQDFPQCN	2.11032	1.79	2.085	2	1.06005	1	2.11032	1.79	1.07746	0.83996	29200000	34600000	60800000	17300000	90000000	51900000	7.95424	7.71517	67275	100646
P16949	1	Stathmin OS=Homo sapiens GN=STMN1 PE=1 SV=3 - [STMN1_HUMAN]	P16949	S25	Stathmin (Leukemia-associated phosphoprotein p18) (Metablastin) (Oncoprotein 18) (Op18) (Phosphoprotein p19) (pp19) (Prosolin) (Protein Pr22) (pp17)	STMN1 C1orf215 LAP18 OP18	QAFELILSPRSKESV	1.65688	1.91649	1.637	2.14133	0.711054	1.09851	1.65688	1.91649	0.728471	0.938465	18600000	48200000	30500000	22600000	49100000	70800000	7.69108	7.85003	6476	30247	CMGC/CDK/CDC2	CDC2, CDK2
Q92545	1	Transmembrane protein 131 OS=Homo sapiens GN=TMEM131 PE=1 SV=2 - [TM131_HUMAN]	Q92545	S1600	Transmembrane protein 131 (Protein RW1)	TMEM131 KIAA0257 RW1	HKLTKAASLPGKNGN	2.18421	1.55113	2.158	1.7331	1.10969	0.793357	2.18421	1.55113	1.12711	0.633316	8050000	104000000	17400000	60100000	25450000	164100000	7.40569	8.21511	7964	113100
Q96K49	1	Transmembrane protein 87B OS=Homo sapiens GN=TMEM87B PE=2 SV=1 - [TM87B_HUMAN]	Q96K49	S496	Transmembrane protein 87B	TMEM87B	LRASKSVSNGTAKPA	2.12753	1.67917	2.102	1.87617	1.07176	0.907793	2.12753	1.67917	1.08918	0.747752	24400000	8580000	51200000	4580000	75600000	13160000	7.87852	7.11926	75471	128226
Q12888	1	Tumor suppressor p53-binding protein 1 OS=Homo sapiens GN=TP53BP1 PE=1 SV=2 - [TP53B_HUMAN]	Q12888	S518	Tumor suppressor p53-binding protein 1 (53BP1) (p53-binding protein 1) (p53BP1)	TP53BP1	DSCKLMLSTSEYSQS	2.28846	1.61844	2.261	1.80832	1.17696	0.854649	2.28846	1.61844	1.19438	0.694608	14700000	59600000	33200000	33000000	47900000	92600000	7.68034	7.96661	5275	27860
Q96A57	1	UPF0414 transmembrane protein C20orf30 OS=Homo sapiens GN=C20orf30 PE=2 SV=1 - [CT030_HUMAN]	Q96A57	S24	Transmembrane protein 230	TMEM230 C20orf30 HSPC274 UNQ2432/PRO4992	VKYSRLSSTDDGYID	2.00405	1.5247	1.98	1.70358	0.9855	0.768568	2.00405	1.5247	1.00292	0.608527	23100000	56800000	45600000	33300000	68700000	90100000	7.83696	7.95472	6637	20914
P50552	1	Vasodilator-stimulated phosphoprotein OS=Homo sapiens GN=VASP PE=1 SV=3 - [VASP_HUMAN]	P50552	S239	Vasodilator-stimulated phosphoprotein (VASP)	VASP	GAKLRKVSKQEEASG	1.65587	2.06221	1.636	2.30415	0.710173	1.20423	1.65587	2.06221	0.72759	1.04419	17300000	24000000	28400000	10400000	45700000	34400000	7.65992	7.53656	44741	67685	AGC/PKG	PKG1, PKG2
O75396	1	Vesicle-trafficking protein SEC22b OS=Homo sapiens GN=SEC22B PE=1 SV=3 - [SC22B_HUMAN]	O75396	S137	Vesicle-trafficking protein SEC22b (ER-Golgi SNARE of 24 kDa) (ERS-24) (ERS24) (SEC22 vesicle-trafficking protein homolog B) (SEC22 vesicle-trafficking protein-like 1)	SEC22B SEC22L1	RARRNLGSINTELQD	1.90789	1.82653	1.885	2.04082	0.914565	1.02915	1.90789	1.82653	0.931982	0.869106	56500000	57700000	107000000	28300000	163500000	86000000	8.21352	7.9345	6216	119459
P18206	1	Vinculin OS=Homo sapiens GN=VCL PE=1 SV=4 - [VINC_HUMAN]	P18206	S434	Vinculin (Metavinculin)	VCL	ERDDILRSLGEISAL	1.90081	1.56469	1.878	1.74825	0.909197	0.805913	1.90081	1.56469	0.926614	0.645873	376000	1460000	707000	834000	1083000	2294000	6.03463	6.36059	102864	106565
P10071	1	Zinc finger protein GLI3 OS=Homo sapiens GN=GLI3 PE=1 SV=5 - [GLI3_HUMAN]	P10071	S865	Transcriptional activator GLI3 (GLI3 form of 190 kDa) (GLI3-190) (GLI3 full length protein) (GLI3FL) [Cleaved into: Transcriptional repressor GLI3R (GLI3 C-terminally truncated form) (GLI3 form of 83 kDa) (GLI3-83)]	GLI3	YLSSRRSSGISPCFS	2.45445	2.19902	2.425	2.457	1.27798	1.2969	2.45445	2.19902	1.2954	1.13686	1540000	1130000	3740000	459000	5280000	1589000	6.72263	6.20112	40147	144763
[truncated: 56 more columns]

## Sheet: Co-Downregulated
Protein Group Accessions	# of Protein Groups	Protein Descriptions	Acc. # 1	Sites Acc. # 1	Protein Names Acc. # 1	Gene Names Acc. # 1	Phosposite Sequence Context	Fold Downregulated Forward	Fold Downregulated Reverse	Ratio (Medium/Light) Forward	Ratio (Light/Medium) Reverse	Log2 Ratio (Medium/Light) Forward	Log2 Ratio (Light/Medium) Reverse	Normalized Ratio (Medium/Light) Forward	Normalized Ratio (Light/Medium) Reverse	Normalized Log2 Ratio (Medium/Light) Forward	Normalized Log2 Ratio (Light/Medium) Reverse	Intensity Light Forward	Intensity Light Reverse	Intensity Medium Forward	Intensity Medium Reverse	Intensity (Light+Medium) Forward	Intensity (Light+Medium) Reverse	Log10 Intensity (Light+Medium) Forward	Log10 Intensity (Light+Medium) Reverse	Quan Result ID Forward	Quan Result ID Reverse	Predicted Kinase Group/Family/Subfamily	Predicted Kinases	Acc. # 2	Sites Acc. # 2	Protein Names Acc. # 2	Gene Names Acc. # 2	Acc. # 3	Sites Acc. # 3	Protein Names Acc. # 3	Gene Names Acc. # 3	Acc. # 4	Sites Acc. # 4	Protein Names Acc. # 4	Gene Names Acc. # 4	Acc. # 5	Sites Acc. # 5	Protein Names Acc. # 5	Gene Names Acc. # 5	Acc. # 6	Sites Acc. # 6	Protein Names Acc. # 6	Gene Names Acc. # 6
Q9C0C2	1	182 kDa tankyrase 1-binding protein OS=Homo sapiens GN=TNKS1BP1 PE=1 SV=3 - [TB182_HUMAN]	Q9C0C2	S1652	182 kDa tankyrase-1-binding protein	TNKS1BP1 KIAA1741 TAB182	VNLFPGLSPSALKAK	1.78339	1.73184	0.554	0.645161	-0.852042	-0.632268	0.560729	0.577419	-0.834625	-0.792309	21500000	64300000	11900000	99600000	33400000	163900000	7.52375	8.21458	6777	121053
O14639	1	Actin-binding LIM protein 1 OS=Homo sapiens GN=ABLIM1 PE=1 SV=3 - [ABLM1_HUMAN]	O14639	S458	Actin-binding LIM protein 1 (abLIM-1) (Actin-binding LIM protein family member 1) (Actin-binding double zinc finger protein) (LIMAB1) (Limatin)	ABLIM1 ABLIM KIAA0059 LIMAB1	TSQGSINSPVYSRHS	2.44554	2.16425	0.404	0.516262	-1.30757	-0.953824	0.408907	0.462055	-1.29016	-1.11386	199000000	41700000	80200000	80800000	279200000	122500000	8.44592	8.08814	3643	114108
P55196	1	Afadin OS=Homo sapiens GN=MLLT4 PE=1 SV=2 - [AFAD_HUMAN]	P55196	S215	Afadin (ALL1-fused gene from chromosome 6 protein) (Protein AF-6)	MLLT4 AF6	TSFTRTISNPEVVMK	1.70345	2.38212	0.58	0.469043	-0.785875	-1.09221	0.587045	0.419794	-0.768458	-1.25225	26600000	50700000	15400000	108000000	42000000	158700000	7.62325	8.20058	104487	114530	STE/STE11	MAP3K1
P55196	1	Afadin OS=Homo sapiens GN=MLLT4 PE=1 SV=2 - [AFAD_HUMAN]	P55196	T1215	Afadin (ALL1-fused gene from chromosome 6 protein) (Protein AF-6)	MLLT4 AF6	TYTREYFTFPASKSQ	1.95644	1.92291	0.505	0.581058	-0.985645	-0.783247	0.511134	0.520046	-0.968228	-0.943288	233000000	208000000	118000000	359000000	351000000	567000000	8.54531	8.75358	6276	119740
P55196	1	Afadin OS=Homo sapiens GN=MLLT4 PE=1 SV=2 - [AFAD_HUMAN]	P55196	T1313	Afadin (ALL1-fused gene from chromosome 6 protein) (Protein AF-6)	MLLT4 AF6	NHSSKSVTPASTLTK	1.82963	2.25698	0.54	0.49505	-0.888969	-1.01436	0.546559	0.443069	-0.871552	-1.1744	24600000	76400000	13300000	154000000	37900000	230400000	7.57864	8.36248	69934	22809
P55196	1	Afadin OS=Homo sapiens GN=MLLT4 PE=1 SV=2 - [AFAD_HUMAN]	P55196	T1472	Afadin (ALL1-fused gene from chromosome 6 protein) (Protein AF-6)	MLLT4 AF6	QPQQQPRTIERRDLQ	3.0875	2.89944	0.32	0.385356	-1.64386	-1.37573	0.323887	0.344894	-1.62644	-1.53577	20300000	4690000	6510000	12200000	26810000	16890000	7.4283	7.22763	47534	72729
P55196	1	Afadin OS=Homo sapiens GN=MLLT4 PE=1 SV=2 - [AFAD_HUMAN]	P55196	T550	Afadin (ALL1-fused gene from chromosome 6 protein) (Protein AF-6)	MLLT4 AF6	RVSSASSTAERGMVK	1.56577	2.1486	0.631	0.520021	-0.664288	-0.943359	0.638664	0.465419	-0.646871	-1.1034	18200000	2320000	11500000	4460000	29700000	6780000	7.47276	6.83123	39244	143762
Q9UKA4	1	A-kinase anchor protein 11 OS=Homo sapiens GN=AKAP11 PE=1 SV=1 - [AKA11_HUMAN]	Q9UKA4	S1103	A-kinase anchor protein 11 (AKAP-11) (A-kinase anchor protein 220 kDa) (AKAP 220) (hAKAP220) (Protein kinase A-anchoring protein 11) (PRKA11)	AKAP11 AKAP220 KIAA0629	VIPDTPPSTPLVPSR	2.57963	1.59888	0.383	0.698812	-1.38458	-0.517024	0.387652	0.625437	-1.36717	-0.677064	1560000	3370000	597000	4820000	2157000	8190000	6.33385	6.91328	22595	99264	CMGC/GSK	GSK3A, GSK3B
Q12802	1	A-kinase anchor protein 13 OS=Homo sapiens GN=AKAP13 PE=1 SV=2 - [AKP13_HUMAN]	Q12802	S1932	A-kinase anchor protein 13 (AKAP-13) (AKAP-Lbc) (Breast cancer nuclear receptor-binding auxiliary protein) (Guanine nucleotide exchange factor Lbc) (Human thyroid-anchoring protein 31) (Lymphoid blast crisis oncogene) (LBC oncogene) (Non-oncogenic Rho GTPase-specific GTP exchange factor) (Protein kinase A-anchoring protein 13) (PRKA13) (p47)	AKAP13 BRX HT31 LBC	FLSHSTDSLNKISKV	1.70345	1.77542	0.58	0.629327	-0.785875	-0.668119	0.587045	0.563247	-0.768458	-0.82816	60600000	82100000	35200000	131000000	95800000	213100000	7.98137	8.32858	4226	114987
Q96Q42	1	Alsin OS=Homo sapiens GN=ALS2 PE=1 SV=1 - [ALS2_HUMAN]	Q96Q42	S492	Alsin (Amyotrophic lateral sclerosis 2 chromosomal region candidate gene 6 protein) (Amyotrophic lateral sclerosis 2 protein)	ALS2 ALS2CR6 KIAA1563	PGLLSQVSPRLLRKA	1.52469	1.5743	0.648	0.709723	-0.625934	-0.494672	0.65587	0.635202	-0.608517	-0.654712	5210000	35900000	3380000	50600000	8590000	86500000	6.93399	7.93702	108017	120972	CMGC/CDK	CDK5
Q8IWZ3	1	Ankyrin repeat and KH domain-containing protein 1 OS=Homo sapiens GN=ANKHD1 PE=1 SV=1 - [ANKH1_HUMAN]	Q8IWZ3	T1538	Ankyrin repeat and KH domain-containing protein 1 (HIV-1 Vpr-binding ankyrin repeat protein) (Multiple ankyrin repeats single KH domain) (hMASK)	ANKHD1 KIAA1085 MASK VBARP PP2500	KRANVVTTPSTNRKN	2.25057	1.92626	0.439	0.580046	-1.18771	-0.78576	0.444332	0.519142	-1.17029	-0.9458	30000000	7590000	13100000	13100000	43100000	20690000	7.63448	7.31576	52134	83147
P53367	1	Arfaptin-1 OS=Homo sapiens GN=ARFIP1 PE=1 SV=2 - [ARFP1_HUMAN]	P53367	S69	Arfaptin-1 (ADP-ribosylation factor-interacting protein 1)	ARFIP1	EAGAFQGSPAPPLPS	3.41869	2.55084	0.289	0.43802	-1.79086	-1.19093	0.29251	0.392028	-1.77344	-1.35097	2860000	8260000	826000	18900000	3686000	27160000	6.56656	7.43393	107253	29623
O00192	1	Armadillo repeat protein deleted in velo-cardio-facial syndrome OS=Homo sapiens GN=ARVCF PE=1 SV=1 - [ARVC_HUMAN]	O00192	S203	Armadillo repeat protein deleted in velo-cardio-facial syndrome	ARVCF	RDSPSYGSLSRGLGM	1.85714	1.99888	0.532	0.558971	-0.910502	-0.839153	0.538462	0.500279	-0.893085	-0.999194	432000000	61700000	230000000	110000000	662000000	171700000	8.82086	8.23477	3987	26619
O95817	1	BAG family molecular chaperone regulator 3 OS=Homo sapiens GN=BAG3 PE=1 SV=3 - [BAG3_HUMAN]	O95817	S136	BAG family molecular chaperone regulator 3 (BAG-3) (Bcl-2-associated athanogene 3) (Bcl-2-binding protein Bis) (Docking protein CAIR-1)	BAG3 BIS	AAPQRSQSPLRGMPE	1.72125	1.61006	0.574	0.693963	-0.800877	-0.52707	0.580972	0.621096	-0.78346	-0.687111	37700000	9190000	21700000	13300000	59400000	22490000	7.77379	7.35199	75282	127415	Atypical/PIKK/FRAP	FRAP
Q9HCM4	1	Band 4.1-like protein 5 OS=Homo sapiens GN=EPB41L5 PE=1 SV=3 - [E41L5_HUMAN]	Q9HCM4	S550	Band 4.1-like protein 5	EPB41L5 KIAA1548	CLNNVIESPGLNVMR	1.69759	1.76313	0.582	0.633714	-0.780909	-0.658097	0.589069	0.567174	-0.763492	-0.818138	8710000	3210000	5080000	5060000	13790000	8270000	7.13956	6.91751	71681	1093
Q9UQB8	1	Brain-specific angiogenesis inhibitor 1-associated protein 2 OS=Homo sapiens GN=BAIAP2 PE=1 SV=1 - [BAIP2_HUMAN]	Q9UQB8	T340	Brain-specific angiogenesis inhibitor 1-associated protein 2 (BAI-associated protein 2) (BAI1-associated protein 2) (Protein BAP2) (Fas ligand-associated factor 3) (FLAF3) (Insulin receptor substrate p53/p58) (IRS-58) (IRSp53/58) (Insulin receptor substrate protein of 53 kDa) (IRSp53) (Insulin receptor substrate p53)	BAIAP2	LSDSYSNTLPVRKSV	2.18102	1.97207	0.453	0.566572	-1.14242	-0.819668	0.458502	0.507082	-1.125	-0.979709	38900000	25400000	17600000	44700000	56500000	70100000	7.75205	7.84572	40660	60778	TKL/RAF	RAF1
Q9UQB8	1	Brain-specific angiogenesis inhibitor 1-associated protein 2 OS=Homo sapiens GN=BAIAP2 PE=1 SV=1 - [BAIP2_HUMAN]	Q9UQB8	T360	Brain-specific angiogenesis inhibitor 1-associated protein 2 (BAI-associated protein 2) (BAI1-associated protein 2) (Protein BAP2) (Fas ligand-associated factor 3) (FLAF3) (Insulin receptor substrate p53/p58) (IRS-58) (IRSp53/58) (Insulin receptor substrate protein of 53 kDa) (IRSp53) (Insulin receptor substrate p53)	BAIAP2	YATTENKTLPRSSSM	3.20779	2.6905	0.308	0.415282	-1.699	-1.26784	0.311741	0.371678	-1.68158	-1.42788	13600000	4870000	4210000	11700000	17810000	16570000	7.25066	7.21932	78139	134445	TKL/RAF	RAF1
O75815	1	Breast cancer anti-estrogen resistance protein 3 OS=Homo sapiens GN=BCAR3 PE=1 SV=1 - [BCAR3_HUMAN]	O75815	S8	Breast cancer anti-estrogen resistance protein 3 (Novel SH2-containing protein 2) (SH2 domain-containing protein 3B)	BCAR3 NSP2 SH2D3B UNQ271/PRO308	MAAGKFASLPRNMPV	1.89272	2.11285	0.522	0.528821	-0.937878	-0.919149	0.52834	0.473295	-0.920461	-1.07919	44200000	32600000	23100000	61600000	67300000	94200000	7.82802	7.97405	4805	27544
Q05682	1	Caldesmon OS=Homo sapiens GN=CALD1 PE=1 SV=2 - [CALD1_HUMAN]	Q05682	S759	Caldesmon (CDM)	CALD1 CAD CDM	KTPDGNKSPAPKPSD	1.52941	1.51061	0.646	0.739645	-0.630394	-0.435095	0.653846	0.661982	-0.612977	-0.595136	190000000	125000000	123000000	169000000	313000000	294000000	8.49554	8.46835	50737	78716	CMGC/CDK/CDC2	CDC2
P35221	1	Catenin alpha-1 OS=Homo sapiens GN=CTNNA1 PE=1 SV=1 - [CTNA1_HUMAN]	P35221	T42	Catenin alpha-1 (Alpha E-catenin) (Cadherin-associated protein) (Renal carcinoma antigen NY-REN-13)	CTNNA1	QVTTLVNTNSKGPSN	2.75209	2.68939	0.359	0.415455	-1.47794	-1.26724	0.36336	0.371832	-1.46053	-1.42728	11900000	65400000	4260000	157000000	16160000	222400000	7.20844	8.34713	107947	120742
O60716	1	Catenin delta-1 OS=Homo sapiens GN=CTNND1 PE=1 SV=1 - [CTND1_HUMAN]	O60716	S352	Catenin delta-1 (Cadherin-associated Src substrate) (CAS) (p120 catenin) (p120(ctn)) (p120(cas))	CTNND1 KIAA0384	GSLASLDSLRKGGPP	2.81481	3.72291	0.351	0.30012	-1.51046	-1.73639	0.355263	0.268607	-1.49304	-1.89643	19500000	11900000	6860000	39800000	26360000	51700000	7.42095	7.71349	37613	51955
O60716	1	Catenin delta-1 OS=Homo sapiens GN=CTNND1 PE=1 SV=1 - [CTND1_HUMAN]	O60716	T199	Catenin delta-1 (Cadherin-associated Src substrate) (CAS) (p120 catenin) (p120(ctn)) (p120(cas))	CTNND1 KIAA0384	PYVGQAGTATLPRNF	1.99194	1.96201	0.496	0.569476	-1.01159	-0.812293	0.502024	0.509681	-0.994171	-0.972333	20700000	146000000	10300000	257000000	31000000	403000000	7.49136	8.60531	70953	117003
O60716	1	Catenin delta-1 OS=Homo sapiens GN=CTNND1 PE=1 SV=1 - [CTND1_HUMAN]	O60716	T201	Catenin delta-1 (Cadherin-associated Src substrate) (CAS) (p120 catenin) (p120(ctn)) (p120(cas))	CTNND1 KIAA0384	VGQAGTATLPRNFHY	2.03292	1.87039	0.486	0.597372	-1.04097	-0.7433	0.491903	0.534648	-1.02355	-0.90334	181000000	188000000	87900000	314000000	268900000	502000000	8.42959	8.7007	5033	27880
O60716	1	Catenin delta-1 OS=Homo sapiens GN=CTNND1 PE=1 SV=1 - [CTND1_HUMAN]	O60716	T59	Catenin delta-1 (Cadherin-associated Src substrate) (CAS) (p120 catenin) (p120(ctn)) (p120(cas))	CTNND1 KIAA0384	NPLMANGTLTRRHQN	2.38072	2.41341	0.415	0.462963	-1.26882	-1.11103	0.42004	0.414352	-1.2514	-1.27107	160000000	60200000	66400000	130000000	226400000	190200000	8.35488	8.27921	37164	52114
O60716	1	Catenin delta-1 OS=Homo sapiens GN=CTNND1 PE=1 SV=1 - [CTND1_HUMAN]	O60716	T98	Catenin delta-1 (Cadherin-associated Src substrate) (CAS) (p120 catenin) (p120(ctn)) (p120(cas))	CTNND1 KIAA0384	HSHLLYSTIPRMQEP	2.53985	2.64022	0.389	0.423191	-1.36216	-1.24062	0.393725	0.378756	-1.34474	-1.40066	180000000	140000000	70000000	330000000	250000000	470000000	8.39794	8.6721	48912	74050
O60716	1	Catenin delta-1 OS=Homo sapiens GN=CTNND1 PE=1 SV=1 - [CTND1_HUMAN]	O60716	Y96	Catenin delta-1 (Cadherin-associated Src substrate) (CAS) (p120 catenin) (p120(ctn)) (p120(cas))	CTNND1 KIAA0384	QDHSHLLYSTIPRMQ	2.65591	2.71397	0.372	0.411692	-1.42663	-1.28036	0.376518	0.368464	-1.40921	-1.4404	70600000	70400000	26300000	171000000	96900000	241400000	7.98632	8.38274	49099	74090	TK/Fak	FAK, PYK2
Q5SW79	1	Centrosomal protein of 170 kDa OS=Homo sapiens GN=CEP170 PE=1 SV=1 - [CE170_HUMAN]	Q5SW79	S1198	Centrosomal protein of 170 kDa (Cep170) (KARP-1-binding protein) (KARP1-binding protein)	CEP170 FAM68A KAB KIAA0470	LVPSDKFSPRIRANS	1.70052	1.58324	0.581	0.705716	-0.78339	-0.50284	0.588057	0.631616	-0.765973	-0.66288	13200000	28500000	7670000	40500000	20870000	69000000	7.31952	7.83885	78781	54746	Other/PLK	PLK1
O43159	1	Cerebral protein 1 OS=Homo sapiens GN=KIAA0409 PE=1 SV=2 - [HUCE1_HUMAN]	O43159	S104	Ribosomal RNA-processing protein 8 (EC 2.1.1.-) (Cerebral protein 1) (Nucleomethylin)	RRP8 KIAA0409 NML hucep-1	QKQGPPCSDSEEEVE	2.13853	1.55419	0.462	0.718907	-1.11404	-0.476122	0.467611	0.643422	-1.09662	-0.636163	2950000	7520000	1360000	10500000	4310000	18020000	6.63448	7.25575	72931	31320
O43159	1	Cerebral protein 1 OS=Homo sapiens GN=KIAA0409 PE=1 SV=2 - [HUCE1_HUMAN]	O43159	S106	Ribosomal RNA-processing protein 8 (EC 2.1.1.-) (Cerebral protein 1) (Nucleomethylin)	RRP8 KIAA0409 NML hucep-1	QGPPCSDSEEEVERK	2.13853	1.55419	0.462	0.718907	-1.11404	-0.476122	0.467611	0.643422	-1.09662	-0.636163	2950000	7520000	1360000	10500000	4310000	18020000	6.63448	7.25575	72931	31320
Q7Z460	1	CLIP-associating protein 1 OS=Homo sapiens GN=CLASP1 PE=1 SV=1 - [CLAP1_HUMAN]	Q7Z460	S1091	CLIP-associating protein 1 (Cytoplasmic linker-associated protein 1) (Multiple asters homolog 1) (Protein Orbit homolog 1) (hOrbit1)	CLASP1 KIAA0622 MAST1	SSNTSVGSPSNTIGR	1.82963	2.30056	0.54	0.485673	-0.888969	-1.04194	0.546559	0.434677	-0.871552	-1.20198	632000000	69600000	341000000	143000000	973000000	212600000	8.98811	8.32756	3486	22397	CMGC/CDK/CDC2	CDC2
Q53SF7	1	Cordon-bleu protein-like 1 OS=Homo sapiens GN=COBLL1 PE=1 SV=2 - [COBL1_HUMAN]	Q53SF7	S394	Cordon-bleu protein-like 1	COBLL1 KIAA0977	SMSAGNSSLRRTKRK	2.26087	1.91397	0.437	0.583771	-1.19429	-0.776525	0.442308	0.522475	-1.17688	-0.936566	18900000	16700000	8250000	28600000	27150000	45300000	7.43377	7.6561	36551	54614
Q9Y6G9	1	Cytoplasmic dynein 1 light intermediate chain 1 OS=Homo sapiens GN=DYNC1LI1 PE=1 SV=3 - [DC1L1_HUMAN]	Q9Y6G9	S421	Cytoplasmic dynein 1 light intermediate chain 1 (LIC1) (Dynein light chain A) (DLC-A) (Dynein light intermediate chain 1, cytosolic)	DYNC1LI1 DNCLI1	SSNVASVSPIPAGSK	1.89272	1.73631	0.522	0.643501	-0.937878	-0.635987	0.52834	0.575933	-0.920461	-0.796027	29800000	29200000	15500000	45300000	45300000	74500000	7.6561	7.87216	4617	27232
O43237	1	Cytoplasmic dynein 1 light intermediate chain 2 OS=Homo sapiens GN=DYNC1LI2 PE=1 SV=1 - [DC1L2_HUMAN]	O43237	S391	Cytoplasmic dynein 1 light intermediate chain 2 (Dynein light intermediate chain 2, cytosolic) (LIC-2) (LIC53/55)	DYNC1LI2 DNCLI2 LIC2	PARGPSGSPRTQGRG	1.62768	1.8514	0.607	0.6035	-0.720232	-0.728574	0.614372	0.540133	-0.702815	-0.888614	61100000	14200000	37100000	23500000	98200000	37700000	7.99211	7.57634	39030	143380
Q14008	1	Cytoskeleton-associated protein 5 OS=Homo sapiens GN=CKAP5 PE=1 SV=2 - [CKAP5_HUMAN]	Q14008	T569	Cytoskeleton-associated protein 5 (Colonic and hepatic tumor overexpressed gene protein) (Ch-TOG)	CKAP5 KIAA0097	APGGAGNTGTKNKKG	3.03067	2.87821	0.326	0.388199	-1.61706	-1.36513	0.32996	0.347438	-1.59964	-1.52517	20700000	7930000	6760000	20400000	27460000	28330000	7.4387	7.45225	39072	158700
Q96JH7	1	Deubiquitinating protein VCIP135 OS=Homo sapiens GN=VCPIP1 PE=1 SV=2 - [VCIP1_HUMAN]	Q96JH7	S768	Deubiquitinating protein VCIP135 (EC 3.4.22.-) (Valosin-containing protein p97/p47 complex-interacting protein 1) (Valosin-containing protein p97/p47 complex-interacting protein p135) (VCP/p47 complex-interacting 135-kDa protein)	VCPIP1 KIAA1850 VCIP135	TPTKAPYSPTTSKEK	1.90734	1.6	0.518	0.698324	-0.948976	-0.518031	0.524291	0.625	-0.931559	-0.678072	14100000	8430000	7320000	12100000	21420000	20530000	7.33082	7.31239	30295	41002
Q9P265	1	Disco-interacting protein 2 homolog B OS=Homo sapiens GN=DIP2B PE=1 SV=3 - [DIP2B_HUMAN]	Q9P265	S203	Disco-interacting protein 2 homolog B (DIP2 homolog B)	DIP2B KIAA1463	EVKGTSGSLADVFAN	1.87121	1.95531	0.528	0.571429	-0.92139	-0.807355	0.534413	0.511429	-0.903973	-0.967395	7840000	7570000	4140000	13300000	11980000	20870000	7.07846	7.31952	107047	29349
Q9P265;Q14689	2	Disco-interacting protein 2 homolog B OS=Homo sapiens GN=DIP2B PE=1 SV=3 - [DIP2B_HUMAN]|Disco-interacting protein 2 homolog A OS=Homo sapiens GN=DIP2A PE=2 SV=2 - [DIP2A_HUMAN]	Q9P265	T283	Disco-interacting protein 2 homolog B (DIP2 homolog B)	DIP2B KIAA1463	KIQQLLNTLKRPKRP	3.64576	3.28827	0.271	0.339789	-1.88364	-1.55729	0.274291	0.304111	-1.86622	-1.71733	3400000	9530000	923000	28000000	4323000	37530000	6.63579	7.57438	71350	118132			Q14689	T279	Disco-interacting protein 2 homolog A (DIP2 homolog A)	DIP2A C21orf106 DIP2 KIAA0184
Q9UJU6	1	Drebrin-like protein OS=Homo sapiens GN=DBNL PE=1 SV=1 - [DBNL_HUMAN]	Q9UJU6	S275	Drebrin-like protein (Cervical SH3P7) (Cervical mucin-associated protein) (Drebrin-F) (HPK1-interacting protein of 55 kDa) (HIP-55) (SH3 domain-containing protein 7)	DBNL CMAP SH3P7 PP5423	MSTTSISSPQPGKLR	2.34123	2.80559	0.422	0.398248	-1.24469	-1.32826	0.427126	0.356432	-1.22727	-1.4883	377000000	150000000	159000000	377000000	536000000	527000000	8.72916	8.72181	3076	112644	CMGC/CDK	CDK4
Q9H9R9	1	Dysbindin domain-containing protein 1 OS=Homo sapiens GN=DBNDD1 PE=2 SV=1 - [DBND1_HUMAN]	Q9H9R9	S119	Dysbindin domain-containing protein 1	DBNDD1	PRAGYLRSPSWTRTR	1.74558	1.96313	0.566	0.569152	-0.821126	-0.813114	0.572874	0.509391	-0.803709	-0.973155	6470000	566000	3660000	994000	10130000	1560000	7.00561	6.19312	41056	145614
O00418	1	Elongation factor 2 kinase OS=Homo sapiens GN=EEF2K PE=1 SV=1 - [EF2K_HUMAN]	O00418	T348	Eukaryotic elongation factor 2 kinase (eEF-2 kinase) (eEF-2K) (EC 2.7.11.20) (Calcium/calmodulin-dependent eukaryotic elongation factor 2 kinase)	EEF2K	KLLQSAKTILRGTEE	2.04132	2.05587	0.484	0.543478	-1.04692	-0.879706	0.489879	0.486413	-1.0295	-1.03975	15500000	50000000	7490000	91900000	22990000	141900000	7.36154	8.15198	36826	51828
Q99961	1	Endophilin-A2 OS=Homo sapiens GN=SH3GL1 PE=1 SV=1 - [SH3G1_HUMAN]	Q99961	S288	Endophilin-A2 (EEN fusion partner of MLL) (Endophilin-2) (Extra eleven-nineteen leukemia fusion gene protein) (EEN) (SH3 domain protein 2B) (SH3 domain-containing GRB2-like protein 1)	SH3GL1 CNSA1 SH3D2B	PKIAASSSFRSSDKP	1.75801	1.90056	0.562	0.587889	-0.831358	-0.766383	0.568826	0.526161	-0.813941	-0.926424	39600000	21700000	22300000	36800000	61900000	58500000	7.79169	7.76716	47929	72980
Q9Y6I3	1	Epsin-1 OS=Homo sapiens GN=EPN1 PE=1 SV=1 - [EPN1_HUMAN]	Q9Y6I3	T435	Epsin-1 (EH domain-binding mitotic phosphoprotein) (EPS-15-interacting protein 1)	EPN1	GSPPPAATPTPTPPT	4.51142	2.60894	0.219	0.428266	-2.191	-1.22342	0.22166	0.383298	-2.17358	-1.38346	1260000	982000	276000	2290000	1536000	3272000	6.18639	6.51481	109117	98979	CMGC/CDK/CDC2	CDC2
Q9Y6I3	1	Epsin-1 OS=Homo sapiens GN=EPN1 PE=1 SV=1 - [EPN1_HUMAN]	Q9Y6I3	T439	Epsin-1 (EH domain-binding mitotic phosphoprotein) (EPS-15-interacting protein 1)	EPN1	PAATPTPTPPTRKTP	4.51142	2.60894	0.219	0.428266	-2.191	-1.22342	0.22166	0.383298	-2.17358	-1.38346	1260000	982000	276000	2290000	1536000	3272000	6.18639	6.51481	109117	98979	CMGC/CDK/CDC2	CDC2
Q6ZNL6	1	FYVE, RhoGEF and PH domain-containing protein 5 OS=Homo sapiens GN=FGD5 PE=2 SV=2 - [FGD5_HUMAN]	Q6ZNL6	S720	FYVE, RhoGEF and PH domain-containing protein 5 (Zinc finger FYVE domain-containing protein 23)	FGD5 ZFYVE23	LRASESPSSLIFYRD	3.0875	2.22458	0.32	0.50226	-1.64386	-0.993493	0.323887	0.449523	-1.62644	-1.15353	9770000	10500000	3120000	20800000	12890000	31300000	7.11025	7.49554	49262	146440
Q6ZNL6	1	FYVE, RhoGEF and PH domain-containing protein 5 OS=Homo sapiens GN=FGD5 PE=2 SV=2 - [FGD5_HUMAN]	Q6ZNL6	S744	FYVE, RhoGEF and PH domain-containing protein 5 (Zinc finger FYVE domain-containing protein 23)	FGD5 ZFYVE23	RTVSRVESFEDRSRP	1.5808	1.6581	0.625	0.673854	-0.678072	-0.569491	0.632591	0.6031	-0.660655	-0.729532	321000000	104000000	201000000	155000000	522000000	259000000	8.71767	8.4133	40164	60253
Q4V328	1	GRIP1-associated protein 1 OS=Homo sapiens GN=GRIPAP1 PE=1 SV=1 - [GRAP1_HUMAN]	Q4V328	S666	GRIP1-associated protein 1 (GRASP-1)	GRIPAP1 KIAA1167	TQTGDSSSISSFSYR	1.55836	1.54078	0.634	0.725163	-0.657445	-0.463622	0.6417	0.649021	-0.640028	-0.623663	25700000	16500000	16300000	22800000	42000000	39300000	7.62325	7.59439	105682	27857
Q9H910	1	Hematological and neurological expressed 1-like protein OS=Homo sapiens GN=HN1L PE=1 SV=1 - [HN1L_HUMAN]	Q9H910	S97	Hematological and neurological expressed 1-like protein (HN1-like protein)	HN1L C16orf34 L11	KTSDIFGSPVTATSR	1.58333	1.66369	0.624	0.671592	-0.680382	-0.574344	0.631579	0.601075	-0.662965	-0.734384	315000000	167000000	197000000	249000000	512000000	416000000	8.70927	8.61909	5619	28735
P16144	1	Integrin beta-4 OS=Homo sapiens GN=ITGB4 PE=1 SV=4 - [ITB4_HUMAN]	P16144	S1069	Integrin beta-4 (GP150) (CD antigen CD104)	ITGB4	LELQEVDSLLRGRQV	1.61967	1.5419	0.61	0.724638	-0.713119	-0.464668	0.617409	0.648551	-0.695702	-0.624709	1820000	15500000	1110000	21400000	2930000	36900000	6.46687	7.56703	108107	121146
P16144	1	Integrin beta-4 OS=Homo sapiens GN=ITGB4 PE=1 SV=4 - [ITB4_HUMAN]	P16144	S1457	Integrin beta-4 (GP150) (CD antigen CD104)	ITGB4	AFPGSTNSLHRMTTT	1.74867	2.04358	0.565	0.546747	-0.823677	-0.871055	0.571862	0.489338	-0.80626	-1.0311	26500000	8370000	15000000	15300000	41500000	23670000	7.61805	7.3742	38742	55954
P16144	1	Integrin beta-4 OS=Homo sapiens GN=ITGB4 PE=1 SV=4 - [ITB4_HUMAN]	P16144	S1494	Integrin beta-4 (GP150) (CD antigen CD104)	ITGB4	TLTRDYNSLTRSEHS	1.59871	2.00559	0.618	0.557103	-0.694321	-0.843984	0.625506	0.498607	-0.676904	-1.00402	4310000	7770000	2660000	13900000	6970000	21670000	6.84323	7.33586	8985	109015	AGC/PKC	PKCa, PKCb, PKCd, PKCg
P18084	1	Integrin beta-5 OS=Homo sapiens GN=ITGB5 PE=2 SV=1 - [ITB5_HUMAN]	P18084	S770	Integrin beta-5	ITGB5	RARYEMASNPLYRKP	2.31382	3.05363	0.427	0.365898	-1.22769	-1.45049	0.432186	0.327479	-1.21027	-1.61053	25700000	9790000	11000000	26800000	36700000	36590000	7.56467	7.56336	43235	27626
Q27J81	1	Inverted formin-2 OS=Homo sapiens GN=INF2 PE=1 SV=2 - [INF2_HUMAN]	Q27J81	T1199	Inverted formin-2 (HBEBP2-binding protein C)	INF2 C14orf151 C14orf173	SFSEDAVTDSSGSGT	2.36364	2.27598	0.418	0.490918	-1.25843	-1.02645	0.423077	0.439372	-1.24101	-1.18649	61100000	8540000	25500000	17400000	86600000	25940000	7.93752	7.41397	5105	23898
Q27J81	1	Inverted formin-2 OS=Homo sapiens GN=INF2 PE=1 SV=2 - [INF2_HUMAN]	Q27J81	T1206	Inverted formin-2 (HBEBP2-binding protein C)	INF2 C14orf151 C14orf173	TDSSGSGTLPRARGR	2.53333	1.81006	0.39	0.617284	-1.35845	-0.695994	0.394737	0.552469	-1.34104	-0.856034	41700000	5580000	16300000	9040000	58000000	14620000	7.76343	7.16495	5352	24104
Q8IVT5	1	Kinase suppressor of Ras 1 OS=Homo sapiens GN=KSR1 PE=1 SV=2 - [KSR1_HUMAN]	Q8IVT5	T272	Kinase suppressor of Ras 1	KSR1 KSR	SFITPPTTPQLRRHT	2.55297	3.46034	0.387	0.322893	-1.36959	-1.63087	0.3917	0.288989	-1.35218	-1.79091	20800000	863000	8040000	2670000	28840000	3533000	7.46	6.54814	44196	37826	STE/STE7	MAP2K1, MAP2K2
Q9NQT8	1	Kinesin-like protein KIF13B OS=Homo sapiens GN=KIF13B PE=1 SV=1 - [KI13B_HUMAN]	Q9NQT8	S1382	Kinesin-like protein KIF13B (Kinesin-like protein GAKIN)	KIF13B GAKIN KIAA0639	LSRRSISSPNVNRLS	2.19069	6.24916	0.451	0.178795	-1.1488	-2.48362	0.456478	0.160021	-1.13138	-2.64366	27000000	433000	12200000	2420000	39200000	2853000	7.59329	6.4553	3174	97801
Q9NQT8	1	Kinesin-like protein KIF13B OS=Homo sapiens GN=KIF13B PE=1 SV=1 - [KI13B_HUMAN]	Q9NQT8	S1644	Kinesin-like protein KIF13B (Kinesin-like protein GAKIN)	KIF13B GAKIN KIAA0639	LEAPAPGSPFRVRRV	1.96421	2.07486	0.503	0.538503	-0.99137	-0.892974	0.509109	0.48196	-0.973953	-1.05301	214000000	82800000	108000000	154000000	322000000	236800000	8.50786	8.37438	41133	61256
Q8NC56	1	LEM domain-containing protein 2 OS=Homo sapiens GN=LEMD2 PE=1 SV=1 - [LEMD2_HUMAN]	Q8NC56	S138	LEM domain-containing protein 2 (hLEM2)	LEMD2	RRASVRGSSEEDEDA	1.77379	1.90615	0.557	0.586166	-0.844251	-0.770618	0.563765	0.524619	-0.826834	-0.930658	4990000	1640000	2780000	2800000	7770000	4440000	6.89042	6.64738	47164	143965
Q86V48	1	Leucine zipper protein 1 OS=Homo sapiens GN=LUZP1 PE=1 SV=2 - [LUZP1_HUMAN]	Q86V48	S423	Leucine zipper protein 1	LUZP1	LSNRQVSSPSFTNRR	1.89272	2.73966	0.522	0.40783	-0.937878	-1.29396	0.52834	0.365008	-0.920461	-1.454	14000000	5610000	7300000	13800000	21300000	19410000	7.32838	7.28803	8942	22704
Q14847	1	LIM and SH3 domain protein 1 OS=Homo sapiens GN=LASP1 PE=1 SV=2 - [LASP1_HUMAN]	Q14847	T104	LIM and SH3 domain protein 1 (LASP-1) (Metastatic lymph node gene 50 protein) (MLN 50)	LASP1 MLN50	GFSVVADTPELQRIK	2.30841	2.42905	0.428	0.459982	-1.22432	-1.12035	0.433198	0.411684	-1.2069	-1.28039	955000000	336000000	409000000	731000000	1364000000	1067000000	9.13481	9.02816	5597	28721
P53671	1	LIM domain kinase 2 OS=Homo sapiens GN=LIMK2 PE=1 SV=1 - [LIMK2_HUMAN]	P53671	S289	LIM domain kinase 2 (LIMK-2) (EC 2.7.11.1)	LIMK2	RSLRRSNSISKSPGP	1.59098	1.73855	0.621	0.642674	-0.687335	-0.637842	0.628543	0.575193	-0.669918	-0.797882	10000000	678000	6220000	1060000	16220000	1738000	7.21005	6.24005	85984	133280	AGC/DMPK/ROCK	ROCK1
Q13136	1	Liprin-alpha-1 OS=Homo sapiens GN=PPFIA1 PE=1 SV=1 - [LIPA1_HUMAN]	Q13136	S1172	Liprin-alpha-1 (LAR-interacting protein 1) (LIP-1) (Protein tyrosine phosphatase receptor type f polypeptide-interacting protein alpha-1) (PTPRF-interacting protein alpha-1)	PPFIA1 LIP1	RVTSSMSSPSMQPKK	1.84673	1.60112	0.535	0.697837	-0.902389	-0.519039	0.541498	0.624564	-0.884972	-0.679079	10400000	15600000	5580000	22300000	15980000	37900000	7.20358	7.57864	7021	22938	CAMK	Trio
Q5SW96	1	Low density lipoprotein receptor adapter protein 1 OS=Homo sapiens GN=LDLRAP1 PE=1 SV=3 - [ARH_HUMAN]	Q5SW96	S14	Low density lipoprotein receptor adapter protein 1 (Autosomal recessive hypercholesterolemia protein)	LDLRAP1 ARH	AGRALIRSPSLAKQS	1.52	1.52849	0.65	0.730994	-0.621488	-0.452068	0.657895	0.65424	-0.604071	-0.612109	17600000	43300000	11400000	59200000	29000000	102500000	7.4624	8.01072	40454	51435	CMGC/CDK	CDK4
Q3KQU3	1	MAP7 domain-containing protein 1 OS=Homo sapiens GN=MAP7D1 PE=1 SV=1 - [MA7D1_HUMAN]	Q3KQU3	S446	MAP7 domain-containing protein 1 (Arginine/proline-rich coiled-coil domain-containing protein 1) (Proline/arginine-rich coiled-coil domain-containing protein 1)	MAP7D1 KIAA1187 PARCC1 RPRC1 PP2464	KRQSLPASPRARLSA	1.52705	1.51844	0.647	0.735835	-0.628162	-0.442545	0.654858	0.658572	-0.610745	-0.602586	121000000	59300000	78600000	80600000	199600000	139900000	8.30016	8.14582	3201	25959
Q15648	1	Mediator of RNA polymerase II transcription subunit 1 OS=Homo sapiens GN=MED1 PE=1 SV=4 - [MED1_HUMAN]	Q15648	T1057	Mediator of RNA polymerase II transcription subunit 1 (Activator-recruited cofactor 205 kDa component) (ARC205) (Mediator complex subunit 1) (Peroxisome proliferator-activated receptor-binding protein) (PBP) (PPAR-binding protein) (Thyroid hormone receptor-associated protein complex 220 kDa component) (Trap220) (Thyroid receptor-interacting protein 2) (TR-interacting protein 2) (TRIP-2) (Vitamin …	MED1 ARC205 CRSP1 CRSP200 DRIP205 DRIP230 PBP PPARBP PPARGBP RB18A TRAP220 TRIP2	QTPPGVATPPIPKIT	3.39519	1.5095	0.291	0.740192	-1.78091	-0.434028	0.294534	0.662472	-1.76349	-0.594068	635000	2510000	185000	3400000	820000	5910000	5.91381	6.77159	21799	98103	CMGC/CDK/CDC2	CDK2
P78559	1	Microtubule-associated protein 1A OS=Homo sapiens GN=MAP1A PE=1 SV=5 - [MAP1A_HUMAN]	P78559	S2022	Microtubule-associated protein 1A (MAP-1A) (Proliferation-related protein p80) [Cleaved into: MAP1 light chain LC2]	MAP1A MAP1L	KELSSPISPKSLQSD	3.3266	4.58994	0.297	0.243427	-1.75147	-2.03844	0.300607	0.217868	-1.73405	-2.19848	191000000	5780000	56700000	23700000	247700000	29480000	8.39393	7.46953	4537	23448	CMGC/CDK	CDK5
P27816	1	Microtubule-associated protein 4 OS=Homo sapiens GN=MAP4 PE=1 SV=2 - [MAP4_HUMAN]	P27816	T917	Microtubule-associated protein 4 (MAP-4)	MAP4	SAKPSSTTPRLSRLA	1.66892	1.97877	0.592	0.564653	-0.756331	-0.824564	0.59919	0.505364	-0.738914	-0.984605	175000000	27700000	104000000	49200000	279000000	76900000	8.4456	7.88593	49587	89333	CMGC/CDK/CDC2	CDC2
O95819	1	Mitogen-activated protein kinase kinase kinase kinase 4 OS=Homo sapiens GN=MAP4K4 PE=1 SV=2 - [M4K4_HUMAN]	O95819	S800	Mitogen-activated protein kinase kinase kinase kinase 4 (EC 2.7.11.1) (HPK/GCK-like kinase HGK) (MAPK/ERK kinase kinase kinase 4) (MEK kinase kinase 4) (MEKKK 4) (Nck-interacting kinase)	MAP4K4 HGK KIAA0687 NIK	PEDTRAASSLNLSNG	3.74242	1.81341	0.264	0.616143	-1.92139	-0.698663	0.267206	0.551448	-1.90397	-0.858703	57700000	19900000	15200000	32300000	72900000	52200000	7.86273	7.71767	4714	27467
O95819	1	Mitogen-activated protein kinase kinase kinase kinase 4 OS=Homo sapiens GN=MAP4K4 PE=1 SV=2 - [M4K4_HUMAN]	O95819	S842	Mitogen-activated protein kinase kinase kinase kinase 4 (EC 2.7.11.1) (HPK/GCK-like kinase HGK) (MAPK/ERK kinase kinase kinase 4) (MEK kinase kinase 4) (MEKKK 4) (Nck-interacting kinase)	MAP4K4 HGK KIAA0687 NIK	LIVRQTQSASSTLQK	2.49495	2.29162	0.396	0.487567	-1.33643	-1.03633	0.40081	0.436373	-1.31901	-1.19637	58100000	52100000	23000000	107000000	81100000	159100000	7.90902	8.20167	103574	112437	STE/STE11	MAP3K1
Q92614	1	Myosin-XVIIIa OS=Homo sapiens GN=MYO18A PE=1 SV=3 - [MY18A_HUMAN]	Q92614	S52	Unconventional myosin-XVIIIa (Molecule associated with JAK3 N-terminus) (MAJN) (Myosin containing a PDZ domain)	MYO18A KIAA0216 MYSPDZ	FFNLNRSSKRESKTR	2.10661	1.75978	0.469	0.634921	-1.09234	-0.655352	0.474696	0.568254	-1.07492	-0.815392	554000	742000	260000	1170000	814000	1912000	5.91062	6.28149	92855	84639
P29966	1	Myristoylated alanine-rich C-kinase substrate OS=Homo sapiens GN=MARCKS PE=1 SV=4 - [MARCS_HUMAN]	P29966	T143	Myristoylated alanine-rich C-kinase substrate (MARCKS) (Protein kinase C substrate, 80 kDa protein, light chain) (80K-L protein) (PKCSL)	MARCKS MACS PRKCSL	PKAEDGATPSPSNET	1.5808	1.82793	0.625	0.611247	-0.678072	-0.710173	0.632591	0.547066	-0.660655	-0.870213	524000000	260000000	328000000	425000000	852000000	685000000	8.93044	8.83569	39089	158702	CMGC/GSK	GSK3A
Q09666	1	Neuroblast differentiation-associated protein AHNAK OS=Homo sapiens GN=AHNAK PE=1 SV=2 - [AHNK_HUMAN]	Q09666	T553	Neuroblast differentiation-associated protein AHNAK (Desmoyokin)	AHNAK PM227	PNLEGTLTGPRLGSP	5.51955	5.26257	0.179	0.212314	-2.48197	-2.23573	0.181174	0.190021	-2.46455	-2.39577	750000	555000	134000	2610000	884000	3165000	5.94645	6.50037	83571	119830
Q09666	1	Neuroblast differentiation-associated protein AHNAK OS=Homo sapiens GN=AHNAK PE=1 SV=2 - [AHNK_HUMAN]	Q09666	T590	Neuroblast differentiation-associated protein AHNAK (Desmoyokin)	AHNAK PM227	VKGGVDVTLPRVEGK	2.71429	2.52961	0.364	0.441696	-1.45799	-1.17887	0.368421	0.395318	-1.44057	-1.33891	421000	1090000	154000	2470000	575000	3560000	5.75967	6.55145	11561	117579
Q8NEY1	1	Neuron navigator 1 OS=Homo sapiens GN=NAV1 PE=1 SV=2 - [NAV1_HUMAN]	Q8NEY1	S490	Neuron navigator 1 (Pore membrane and/or filament-interacting-like protein 3) (Steerin-1) (Unc-53 homolog 1) (unc53H1)	NAV1 KIAA1151 KIAA1213 POMFIL3 STEERIN1	KLEYDSGSLKMEPGT	1.55591	2.75307	0.635	0.405844	-0.655172	-1.301	0.642713	0.363231	-0.637754	-1.46104	14300000	3000000	9070000	7400000	23370000	10400000	7.36866	7.01703	87964	70972
Q5SYE7	1	NHS-like protein 1 OS=Homo sapiens GN=NHSL1 PE=1 SV=2 - [NHSL1_HUMAN]	Q5SYE7	S198	NHS-like protein 1	NHSL1 C6orf63 KIAA1357	TQTNWTKSLPLPTPE	2.08879	2.13631	0.473	0.523013	-1.08009	-0.935083	0.478745	0.468096	-1.06267	-1.09512	18800000	20500000	8860000	39100000	27660000	59600000	7.44185	7.77525	101935	19262
Q6GQQ9	1	OTU domain-containing protein 7B OS=Homo sapiens GN=OTUD7B PE=1 SV=1 - [OTU7B_HUMAN]	Q6GQQ9	S508	OTU domain-containing protein 7B (EC 3.4.19.12) (Cellular zinc finger anti-NF-kappa-B protein) (Zinc finger A20 domain-containing protein 1) (Zinc finger protein Cezanne)	OTUD7B ZA20D1	SVANKLGSFGKTLGS	2.3357	2.12626	0.423	0.525486	-1.24127	-0.928276	0.428138	0.47031	-1.22385	-1.08832	10600000	8170000	4490000	15500000	15090000	23670000	7.17869	7.3742	51078	115697
O75167	1	Phosphatase and actin regulator 2 OS=Homo sapiens GN=PHACTR2 PE=1 SV=2 - [PHAR2_HUMAN]	O75167	S522	Phosphatase and actin regulator 2	PHACTR2 C6orf56 KIAA0680	TKLVRRLSQRPTTEE	1.84673	1.53408	0.535	0.728332	-0.902389	-0.457332	0.541498	0.651857	-0.884972	-0.617372	82600000	37400000	44200000	51300000	126800000	88700000	8.10312	7.94792	50573	78544
O00443	1	Phosphatidylinositol-4-phosphate 3-kinase C2 domain-containing alpha polypeptide OS=Homo sapiens GN=PIK3C2A PE=1 SV=2 - [P3C2A_HUMAN]	O00443	S336	Phosphatidylinositol 4-phosphate 3-kinase C2 domain-containing subunit alpha (PI3K-C2-alpha) (PtdIns-3-kinase C2 subunit alpha) (EC 2.7.1.154) (Phosphoinositide 3-kinase-C2-alpha)	PIK3C2A	SVATVTRSQSLNIRT	1.78662	1.57207	0.553	0.710732	-0.854649	-0.492622	0.559717	0.636105	-0.837232	-0.652663	3330000	52400000	1840000	73800000	5170000	126200000	6.71349	8.10106	536	22791
Q6VY07	1	Phosphofurin acidic cluster sorting protein 1 OS=Homo sapiens GN=PACS1 PE=1 SV=2 - [PACS1_HUMAN]	Q6VY07	T504	Phosphofurin acidic cluster sorting protein 1 (PACS-1)	PACS1 KIAA1175	SKVEGVHTPRQKRST	2.26606	2.55307	0.436	0.437637	-1.1976	-1.19219	0.441296	0.391685	-1.18018	-1.35223	20100000	10200000	8760000	23300000	28860000	33500000	7.4603	7.52504	87274	68345
Q9H7P9	1	Pleckstrin homology domain-containing family G member 2 OS=Homo sapiens GN=PLEKHG2 PE=1 SV=2 - [PKHG2_HUMAN]	Q9H7P9	S450	Pleckstrin homology domain-containing family G member 2 (PH domain-containing family G member 2)	PLEKHG2	PLTPPLGSPRPRDAR	1.61175	1.70391	0.613	0.655738	-0.706041	-0.608809	0.620445	0.586885	-0.688624	-0.76885	27000000	35400000	16600000	54000000	43600000	89400000	7.63949	7.95134	83499	61582
Q53GL0	1	Pleckstrin homology domain-containing family O member 1 OS=Homo sapiens GN=PLEKHO1 PE=1 SV=2 - [PKHO1_HUMAN]	Q53GL0	T254	Pleckstrin homology domain-containing family O member 1 (PH domain-containing family O member 1) (C-Jun-binding protein) (JBP) (Casein kinase 2-interacting protein 1) (CK2-interacting protein 1) (CKIP-1) (Osteoclast maturation-associated gene 120 protein)	PLEKHO1 CKIP1 HQ0024c OC120	TDKGATYTPQAPKKL	1.78018	1.64358	0.555	0.67981	-0.84944	-0.556797	0.561741	0.60843	-0.832023	-0.716838	5750000	31700000	3190000	46600000	8940000	78300000	6.95134	7.89376	8286	26101
Q86UU1	1	Pleckstrin homology-like domain family B member 1 OS=Homo sapiens GN=PHLDB1 PE=1 SV=1 - [PHLB1_HUMAN]	Q86UU1	S1017	Pleckstrin homology-like domain family B member 1 (Protein LL5-alpha)	PHLDB1 KIAA0638 LL5A DLNB07	LTQNGTGSLPRNLAA	1.91103	2.25028	0.517	0.496524	-0.951764	-1.01006	0.523279	0.444389	-0.934347	-1.1701	35400000	48400000	18300000	97400000	53700000	145800000	7.72997	8.16376	105861	117445
Q86UU1	1	Pleckstrin homology-like domain family B member 1 OS=Homo sapiens GN=PHLDB1 PE=1 SV=1 - [PHLB1_HUMAN]	Q86UU1	S489	Pleckstrin homology-like domain family B member 1 (Protein LL5-alpha)	PHLDB1 KIAA0638 LL5A DLNB07	LNREVAESPRPRRWA	2.39806	2.70503	0.412	0.413052	-1.27928	-1.2756	0.417004	0.369682	-1.26187	-1.43564	8450000	5520000	3480000	13400000	11930000	18920000	7.07664	7.27692	91483	143410
Q15149	1	Plectin-1 OS=Homo sapiens GN=PLEC1 PE=1 SV=2 - [PLEC1_HUMAN]	Q15149	S4396	Plectin (PCN) (PLTN) (Hemidesmosomal protein 1) (HD1) (Plectin-1)	PLEC PLEC1	SSSSYPISPAVSRTQ	1.89272	2.21676	0.522	0.504032	-0.937878	-0.988412	0.52834	0.451109	-0.920461	-1.14845	194000000	94200000	101000000	187000000	295000000	281200000	8.46982	8.44902	4492	27328	CMGC/CDK/CDC2	CDC2, CDK2
Q8TD16	1	Protein bicaudal D homolog 2 OS=Homo sapiens GN=BICD2 PE=1 SV=1 - [BICD2_HUMAN]	Q8TD16	T821	Protein bicaudal D homolog 2 (Bic-D 2)	BICD2 KIAA0699	APKTKPATPSL****	1.94488	1.66257	0.508	0.672043	-0.9771	-0.573375	0.51417	0.601478	-0.959683	-0.733415	13500000	5140000	6880000	7650000	20380000	12790000	7.3092	7.10687	13215	31474	Other/PLK	PLK1
Q5TDH0	1	Protein DDI1 homolog 2 OS=Homo sapiens GN=DDI2 PE=1 SV=1 - [DDI2_HUMAN]	Q5TDH0	S106	Protein DDI1 homolog 2	DDI2	IAVPGTSSPRQRQPP	2.13853	2.20559	0.462	0.506586	-1.11404	-0.981122	0.467611	0.453394	-1.09662	-1.14116	75700000	31800000	35000000	62700000	110700000	94500000	8.04415	7.97543	107631	30055
A6ND36	1	Protein FAM83G OS=Homo sapiens GN=FAM83G PE=1 SV=2 - [FA83G_HUMAN]	A6ND36	S760	Protein FAM83G	FAM83G	RLLPDPGSPRLAQNA	2.23529	1.93855	0.442	0.576369	-1.17788	-0.794936	0.447368	0.51585	-1.16046	-0.954976	6640000	8310000	2940000	14400000	9580000	22710000	6.98137	7.35622	105108	23277
Q9Y219	1	Protein jagged-2 OS=Homo sapiens GN=JAG2 PE=1 SV=3 - [JAG2_HUMAN]	Q9Y219	S1208	Protein jagged-2 (Jagged2) (hJ2)	JAG2	FTKDPGRSPGRPAHW	1.55102	1.52291	0.637	0.733676	-0.650635	-0.446786	0.644737	0.65664	-0.633218	-0.606826	5890000	7360000	3750000	10000000	9640000	17360000	6.98408	7.23955	57929	87921
Q96C90	1	Protein phosphatase 1 regulatory subunit 14B OS=Homo sapiens GN=PPP1R14B PE=1 SV=3 - [PP14B_HUMAN]	Q96C90	T57	Protein phosphatase 1 regulatory subunit 14B (Phospholipase C-beta-3 neighbouring gene protein)	PPP1R14B PLCB3N PNG	VRRQGKVTVKYDRKE	1.79636	1.78436	0.55	0.626174	-0.862496	-0.675364	0.55668	0.560426	-0.845079	-0.835405	8080000	10300000	4440000	16400000	12520000	26700000	7.0976	7.42651	50099	78023	TKL/MLK	ILK
Q9ULL8	1	Protein Shroom4 OS=Homo sapiens GN=SHROOM4 PE=1 SV=2 - [SHRM4_HUMAN]	Q9ULL8	T590	Protein Shroom4 (Second homolog of apical protein)	SHROOM4 KIAA1202 SHAP	RKSERFATNLRNEIQ	1.94872	2.00782	0.507	0.556483	-0.979942	-0.84559	0.513158	0.498052	-0.962525	-1.00563	49200000	14100000	25000000	25300000	74200000	39400000	7.8704	7.5955	41263	145797
Q9C0D5	1	Protein TANC1 OS=Homo sapiens GN=TANC1 PE=1 SV=2 - [TANC1_HUMAN]	Q9C0D5	S67	Protein TANC1 (Tetratricopeptide repeat, ankyrin repeat and coiled-coil domain-containing protein 1)	TANC1 KIAA1728	VSMSLPSSPLLPRQS	1.85714	2.60335	0.532	0.429185	-0.910502	-1.22033	0.538462	0.38412	-0.893085	-1.38037	19000000	1820000	10100000	4240000	29100000	6060000	7.46389	6.78247	21241	97399
Q9C0D5	1	Protein TANC1 OS=Homo sapiens GN=TANC1 PE=1 SV=2 - [TANC1_HUMAN]	Q9C0D5	T687	Protein TANC1 (Tetratricopeptide repeat, ankyrin repeat and coiled-coil domain-containing protein 1)	TANC1 KIAA1728	LNGKADATLIGKVSS	1.56825	1.65698	0.63	0.674309	-0.666576	-0.568519	0.637652	0.603506	-0.649159	-0.728559	2420000	2780000	1520000	4130000	3940000	6910000	6.5955	6.83948	9549	109238
Q6V0I7	1	Protocadherin Fat 4 OS=Homo sapiens GN=FAT4 PE=2 SV=2 - [FAT4_HUMAN]	Q6V0I7	S4655	Protocadherin Fat 4 (hFat4) (Cadherin family member 14) (FAT tumor suppressor homolog 4) (Fat-like cadherin protein FAT-J)	FAT4 CDHF14 FATJ Nbla00548	KFSIQRHSPLGFARQ	1.71528	1.52626	0.576	0.732064	-0.795859	-0.449957	0.582996	0.655198	-0.778442	-0.609998	15600000	23700000	8970000	32400000	24570000	56100000	7.39041	7.74896	51506	170568
Q15276	1	Rab GTPase-binding effector protein 1 OS=Homo sapiens GN=RABEP1 PE=1 SV=2 - [RABE1_HUMAN]	Q15276	S410	Rab GTPase-binding effector protein 1 (Rabaptin-4) (Rabaptin-5) (Rabaptin-5alpha) (Renal carcinoma antigen NY-REN-17)	RABEP1 RAB5EP RABPT5 RABPT5A	RRAQSTDSLGTSGSL	1.87476	2.13408	0.527	0.52356	-0.924125	-0.933573	0.533401	0.468586	-0.906708	-1.09361	34800000	21500000	18300000	41000000	53100000	62500000	7.72509	7.79588	104346	114214	STE/STE20	NRK
Q9UJ41	1	Rab5 GDP/GTP exchange factor OS=Homo sapiens GN=RABGEF1 PE=1 SV=2 - [RABX5_HUMAN]	Q9UJ41	S302	Rab5 GDP/GTP exchange factor (RAP1) (Rabaptin-5-associated exchange factor for Rab5) (Rabex-5)	RABGEF1 RABEX5	IQEAKAPSPSINRQT	2.31925	2.09609	0.426	0.533049	-1.23107	-0.90766	0.431174	0.477079	-1.21366	-1.0677	33900000	9080000	14400000	17000000	48300000	26080000	7.68395	7.41631	36095	51188
Q8NHQ8	1	Ras association domain-containing protein 8 OS=Homo sapiens GN=RASSF8 PE=1 SV=2 - [RASF8_HUMAN]	Q8NHQ8	S387	Ras association domain-containing protein 8 (Carcinoma-associated protein HOJ-1)	RASSF8 C12orf2	EAPFQSGSLKRPGSS	2.41565	1.78101	0.409	0.627353	-1.28983	-0.672652	0.413968	0.561481	-1.27241	-0.832692	38400000	6770000	15700000	10800000	54100000	17570000	7.7332	7.24477	48073	151178
Q8NHQ8	1	Ras association domain-containing protein 8 OS=Homo sapiens GN=RASSF8 PE=1 SV=2 - [RASF8_HUMAN]	Q8NHQ8	T131	Ras association domain-containing protein 8 (Carcinoma-associated protein HOJ-1)	RASSF8 C12orf2	EPKRKSLTFTGGAKG	1.70639	1.70838	0.579	0.654022	-0.788365	-0.612588	0.586032	0.58535	-0.770948	-0.772629	2580000	12000000	1490000	18400000	4070000	30400000	6.60959	7.48287	10967	27606
Q8WUF5	1	RelA-associated inhibitor OS=Homo sapiens GN=PPP1R13L PE=1 SV=4 - [IASPP_HUMAN]	Q8WUF5	S134	RelA-associated inhibitor (Inhibitor of ASPP protein) (Protein iASPP) (NFkB-interacting protein 1) (PPP1R13B-like protein)	PPP1R13L IASPP NKIP1 PPP1R13BL RAI	LQPDAYGSLDRATSP	2.57963	2.11397	0.383	0.528541	-1.38458	-0.919912	0.387652	0.473044	-1.36717	-1.07995	59700000	55500000	22900000	105000000	82600000	160500000	7.91698	8.20548	107407	29782
Q8WUF5	1	RelA-associated inhibitor OS=Homo sapiens GN=PPP1R13L PE=1 SV=4 - [IASPP_HUMAN]	Q8WUF5	T308	RelA-associated inhibitor (Inhibitor of ASPP protein) (Protein iASPP) (NFkB-interacting protein 1) (PPP1R13B-like protein)	PPP1R13L IASPP NKIP1 PPP1R13BL RAI	KDNLTSATLPRNYKV	2.80682	2.62458	0.352	0.425713	-1.50635	-1.23205	0.356275	0.381013	-1.48894	-1.39209	6160000	16300000	2170000	38200000	8330000	54500000	6.92065	7.7364	10693	116337
Q8WUF5	1	RelA-associated inhibitor OS=Homo sapiens GN=PPP1R13L PE=1 SV=4 - [IASPP_HUMAN]	Q8WUF5	T341	RelA-associated inhibitor (Inhibitor of ASPP protein) (Protein iASPP) (NFkB-interacting protein 1) (PPP1R13B-like protein)	PPP1R13L IASPP NKIP1 PPP1R13BL RAI	GSAGPSGTLPRSWQP	2.17143	2.0648	0.455	0.541126	-1.13606	-0.885965	0.460526	0.484307	-1.11864	-1.04601	24500000	54700000	11200000	101000000	35700000	155700000	7.55267	8.19229	105089	27209
Q96PE2	1	Rho guanine nucleotide exchange factor 17 OS=Homo sapiens GN=ARHGEF17 PE=1 SV=1 - [ARHGH_HUMAN]	Q96PE2	S914	Rho guanine nucleotide exchange factor 17 (164 kDa Rho-specific guanine-nucleotide exchange factor) (p164-RhoGEF) (p164RhoGEF) (Tumor endothelial marker 4)	ARHGEF17 KIAA0337 TEM4	PKLADILSPRLIRRG	2.12017	2.05028	0.466	0.544959	-1.1016	-0.87578	0.47166	0.487738	-1.08418	-1.03582	87700000	31200000	40900000	57200000	128600000	88400000	8.10924	7.94645	5617	24307
Q13464	1	Rho-associated protein kinase 1 OS=Homo sapiens GN=ROCK1 PE=1 SV=1 - [ROCK1_HUMAN]	Q13464	S1328	Rho-associated protein kinase 1 (EC 2.7.11.1) (Renal carcinoma antigen NY-REN-35) (Rho-associated, coiled-coil-containing protein kinase 1) (Rho-associated, coiled-coil-containing protein kinase I) (ROCK-I) (p160 ROCK-1) (p160ROCK)	ROCK1	PSGFVRASPRTLSTR	1.6039	1.62346	0.616	0.688231	-0.698998	-0.539035	0.623482	0.615967	-0.681581	-0.699075	72100000	92100000	44400000	134000000	116500000	226100000	8.06633	8.3543	40097	60390
Q9Y3C5	1	RING finger protein 11 OS=Homo sapiens GN=RNF11 PE=1 SV=1 - [RNF11_HUMAN]	Q9Y3C5	S14	RING finger protein 11	RNF11 CGI-123	SPTSDDISLLHESQS	1.58587	1.57877	0.623	0.707714	-0.682696	-0.498761	0.630567	0.633404	-0.665279	-0.658802	11500000	1830000	7190000	2590000	18690000	4420000	7.27161	6.64542	76024	125197
Q9UHD8	1	Septin-9 OS=Homo sapiens GN=SEPT9 PE=1 SV=2 - [SEPT9_HUMAN]	Q9UHD8	T142	Septin-9 (MLL septin-like fusion protein MSF-A) (MLL septin-like fusion protein) (Ovarian/Breast septin) (Ov/Br septin) (Septin D1)	SEPT9 KIAA0991 MSF	AEVLGHKTPEPAPRR	2.77528	1.67374	0.356	0.667557	-1.49005	-0.583038	0.360324	0.597463	-1.47263	-0.743078	65200000	50900000	23200000	76200000	88400000	127100000	7.94645	8.10415	58800	90342
O94804	1	Serine/threonine-protein kinase 10 OS=Homo sapiens GN=STK10 PE=1 SV=1 - [STK10_HUMAN]	O94804	S514	Serine/threonine-protein kinase 10 (EC 2.7.11.1) (Lymphocyte-oriented kinase)	STK10 LOK	SLNKEMGSLSIKDPK	2.54639	2.65475	0.388	0.420875	-1.36587	-1.24853	0.392713	0.376684	-1.34845	-1.40858	11800000	12700000	4600000	30100000	16400000	42800000	7.21484	7.63144	79138	134332
Q9BYB0	1	SH3 and multiple ankyrin repeat domains protein 3 OS=Homo sapiens GN=SHANK3 PE=1 SV=2 - [SHAN3_HUMAN]	Q9BYB0	S366	SH3 and multiple ankyrin repeat domains protein 3 (Shank3) (Proline-rich synapse-associated protein 2) (ProSAP2)	SHANK3 KIAA1650 PSAP2	AGPSGLASPRPLQRS	1.78018	1.9162	0.555	0.58309	-0.84944	-0.778209	0.561741	0.521866	-0.832023	-0.938249	295000000	309000000	164000000	529000000	459000000	838000000	8.66181	8.92324	37146	52095
Q9BYB0	1	SH3 and multiple ankyrin repeat domains protein 3 OS=Homo sapiens GN=SHANK3 PE=1 SV=2 - [SHAN3_HUMAN]	Q9BYB0	T553	SH3 and multiple ankyrin repeat domains protein 3 (Shank3) (Proline-rich synapse-associated protein 2) (ProSAP2)	SHANK3 KIAA1650 PSAP2	KRLFRHYTVGSYDSL	1.89635	1.65363	0.521	0.675676	-0.940645	-0.565597	0.527328	0.60473	-0.923228	-0.725638	9820000	8380000	5120000	12400000	14940000	20780000	7.17435	7.31765	86036	64096
Q7Z6B7	1	SLIT-ROBO Rho GTPase-activating protein 1 OS=Homo sapiens GN=SRGAP1 PE=1 SV=1 - [SRGP1_HUMAN]	Q7Z6B7	S932	SLIT-ROBO Rho GTPase-activating protein 1 (srGAP1) (Rho GTPase-activating protein 13)	SRGAP1 ARHGAP13 KIAA1304	DSLKKIDSPPIRRST	1.61702	1.58212	0.611	0.706215	-0.710756	-0.501821	0.618421	0.632062	-0.693339	-0.661862	21400000	30800000	13100000	43600000	34500000	74400000	7.53782	7.87157	52579	83564
Q9UBP0	1	Spastin OS=Homo sapiens GN=SPAST PE=1 SV=1 - [SPAST_HUMAN]	Q9UBP0	T303	Spastin (EC 3.6.4.3) (Spastic paraplegia 4 protein)	SPAST ADPSP FSP2 KIAA1083 SPG4	NRTNKPSTPTTATRK	1.79636	2.03017	0.55	0.550358	-0.862496	-0.861558	0.55668	0.49257	-0.845079	-1.0216	49400000	10800000	27200000	19500000	76600000	30300000	7.88423	7.48144	47032	164332	CMGC/CDK/CDC2	CDC2
Q05519	1	Splicing factor arginine/serine-rich 11 OS=Homo sapiens GN=SFRS11 PE=1 SV=1 - [SFR11_HUMAN]	Q05519	S456	Serine/arginine-rich splicing factor 11 (Arginine-rich 54 kDa nuclear protein) (p54) (Splicing factor, arginine/serine-rich 11)	SRSF11 SFRS11	SPKTKECSVEKGTGD	1.53894	2.09832	0.642	0.532481	-0.639355	-0.909197	0.649798	0.476571	-0.621938	-1.06924	17200000	4730000	11000000	8890000	28200000	13620000	7.45025	7.13418	87022	67873
Q9H2G2	1	STE20-like serine/threonine-protein kinase OS=Homo sapiens GN=SLK PE=1 SV=1 - [SLK_HUMAN]	Q9H2G2	S779	STE20-like serine/threonine-protein kinase (STE20-like kinase) (hSLK) (EC 2.7.11.1) (CTCL tumor antigen se20-9) (STE20-related serine/threonine-protein kinase) (STE20-related kinase) (Serine/threonine-protein kinase 2)	SLK KIAA0204 STK2	SKTKDSGSISLQETR	2.39806	2.75866	0.412	0.405022	-1.27928	-1.30393	0.417004	0.362495	-1.26187	-1.46397	22700000	8530000	9360000	21100000	32060000	29630000	7.50596	7.47173	66628	13450
O95425	1	Supervillin OS=Homo sapiens GN=SVIL PE=1 SV=1 - [SVIL_HUMAN]	O95425	S50	Supervillin (Archvillin) (p205/p250)	SVIL	MRASDPASPHIGRSN	1.84328	1.85475	0.536	0.60241	-0.899695	-0.731183	0.54251	0.539157	-0.882278	-0.891224	66200000	53000000	35500000	87900000	101700000	140900000	8.00732	8.14891	35334	133767	CMGC/MAPK	Erk1
P56962	1	Syntaxin-17 OS=Homo sapiens GN=STX17 PE=2 SV=2 - [STX17_HUMAN]	P56962	S289	Syntaxin-17	STX17	MMEKLTSSCPDLPSQ	1.54859	2.04916	0.638	0.545256	-0.648372	-0.874994	0.645749	0.488004	-0.630955	-1.03503	3230000	3570000	2060000	6560000	5290000	10130000	6.72346	7.00561	75135	54547
Q9Y490	1	Talin-1 OS=Homo sapiens GN=TLN1 PE=1 SV=3 - [TLN1_HUMAN]	Q9Y490	T144	Talin-1	TLN1 KIAA1027 TLN	KKEEITGTLRKDKTL	1.58842	1.66034	0.622	0.672948	-0.685014	-0.571434	0.629555	0.602288	-0.667596	-0.731475	5470000	11900000	3400000	17700000	8870000	29600000	6.94792	7.47129	50156	78072
O60343	1	TBC1 domain family member 4 OS=Homo sapiens GN=TBC1D4 PE=1 SV=2 - [TBCD4_HUMAN]	O60343	S591	TBC1 domain family member 4 (Akt substrate of 160 kDa) (AS160)	TBC1D4 AS160 KIAA0603	GRLGSVDSFERSNSL	1.63036	1.70391	0.606	0.655738	-0.72261	-0.608809	0.61336	0.586885	-0.705193	-0.76885	157000000	43900000	95200000	66900000	252200000	110800000	8.40175	8.04454	5096	117304
Q9Y2W1	1	Thyroid hormone receptor-associated protein 3 OS=Homo sapiens GN=THRAP3 PE=1 SV=2 - [TR150_HUMAN]	Q9Y2W1	S248	Thyroid hormone receptor-associated protein 3 (Thyroid hormone receptor-associated protein complex 150 kDa component) (Trap150)	THRAP3 TRAP150	ELSPRERSPALKSPL	2.26087	1.70279	0.437	0.656168	-1.19429	-0.607863	0.442308	0.58727	-1.17688	-0.767903	5580000	14600000	2440000	22200000	8020000	36800000	6.90417	7.56585	48961	74211	CMGC/CDK	CDK8
Q07157	1	Tight junction protein ZO-1 OS=Homo sapiens GN=TJP1 PE=1 SV=3 - [ZO1_HUMAN]	Q07157	T1167	Tight junction protein ZO-1 (Tight junction protein 1) (Zona occludens protein 1) (Zonula occludens protein 1)	TJP1 ZO1	QPAPGYDTHGRLRPE	1.71231	1.57542	0.577	0.70922	-0.793357	-0.495695	0.584008	0.634752	-0.77594	-0.655736	7460000	368000	4310000	520000	11770000	888000	7.07078	5.94841	91446	153602
Q07157	1	Tight junction protein ZO-1 OS=Homo sapiens GN=TJP1 PE=1 SV=3 - [ZO1_HUMAN]	Q07157	T589	Tight junction protein ZO-1 (Tight junction protein 1) (Zona occludens protein 1) (Zonula occludens protein 1)	TJP1 ZO1	QLASVQYTLPKTAGG	2.87209	1.76536	0.344	0.632911	-1.53952	-0.659925	0.348178	0.566456	-1.5221	-0.819965	5100000	3590000	1750000	5670000	6850000	9260000	6.83569	6.96661	85872	64175	TKL/MLK	ILK, ZAK
Q9UDY2	1	Tight junction protein ZO-2 OS=Homo sapiens GN=TJP2 PE=1 SV=1 - [ZO2_HUMAN]	Q9UDY2	S986	Tight junction protein ZO-2 (Tight junction protein 2) (Zona occludens protein 2) (Zonula occludens protein 2)	TJP2 X104 ZO2	SDQLRDNSPPPAFKP	1.50152	1.72067	0.658	0.649351	-0.603841	-0.62293	0.665992	0.581169	-0.586423	-0.782971	524000000	117000000	345000000	180000000	869000000	297000000	8.93902	8.47276	43358	66205	CMGC/MAPK	Erk2
Q9UKE5	1	TRAF2 and NCK-interacting protein kinase OS=Homo sapiens GN=TNIK PE=1 SV=1 - [TNIK_HUMAN]	Q9UKE5	S548	TRAF2 and NCK-interacting protein kinase (EC 2.7.11.1)	TNIK KIAA0551	SRLNRQSSPAMPHKV	1.53894	1.67933	0.642	0.665336	-0.639355	-0.587845	0.649798	0.595476	-0.621938	-0.747885	42900000	20900000	27600000	31500000	70500000	52400000	7.84819	7.71933	77272	50169
Q14157	1	Ubiquitin-associated protein 2-like OS=Homo sapiens GN=UBAP2L PE=1 SV=2 - [UBP2L_HUMAN]	Q14157	S416	Ubiquitin-associated protein 2-like (Protein NICE-4)	UBAP2L KIAA0144 NICE4	PSDSAVHSPFTKRQA	1.74558	2.24804	0.566	0.497018	-0.821126	-1.00863	0.572874	0.444831	-0.803709	-1.16867	93600000	42300000	52900000	85000000	146500000	127300000	8.16584	8.10483	35881	50949
Q5SQI0	1	UPF0635 protein C6orf134 OS=Homo sapiens GN=C6orf134 PE=2 SV=1 - [CF134_HUMAN]	Q5SQI0	S315	Alpha-tubulin N-acetyltransferase (Alpha-TAT) (TAT) (EC 2.3.1.108) (Acetyltransferase mec-17 homolog)	ATAT1 C6orf134 MEC17 Nbla00487	LAADPGGSPAQRRRT	1.8855	1.9676	0.524	0.567859	-0.932361	-0.816395	0.530364	0.508234	-0.914944	-0.976435	85000000	26100000	44500000	45900000	129500000	72000000	8.11227	7.85733	5228	28179
P50552	1	Vasodilator-stimulated phosphoprotein OS=Homo sapiens GN=VASP PE=1 SV=3 - [VASP_HUMAN]	P50552	S314	Vasodilator-stimulated phosphoprotein (VASP)	VASP	RRPWEKNSTTLPRMK	3.49117	2.49274	0.283	0.448229	-1.82113	-1.15769	0.286437	0.401165	-1.80371	-1.31773	16600000	367000000	4710000	819000000	21310000	1186000000	7.32858	9.07408	69330	108481
O43516	1	WAS/WASL-interacting protein family member 1 OS=Homo sapiens GN=WIPF1 PE=1 SV=2 - [WIPF1_HUMAN]	O43516	T398	WAS/WASL-interacting protein family member 1 (Protein PRPL-2) (Wiskott-Aldrich syndrome protein-interacting protein) (WASP-interacting protein)	WIPF1 WASPIP WIP	TSRALPATPQLPSRS	1.78339	2.50838	0.554	0.445434	-0.852042	-1.16672	0.560729	0.398664	-0.834625	-1.32676	6510000	9100000	3610000	20400000	10120000	29500000	7.00518	7.46982	11103	23823
O15231	1	Zinc finger protein 185 OS=Homo sapiens GN=ZNF185 PE=1 SV=2 - [ZN185_HUMAN]	O15231	T23	Zinc finger protein 185 (LIM domain protein ZNF185) (P1-A)	ZNF185	RSSTSGDTEEEEEEE	1.82963	1.5486	0.54	0.721501	-0.888969	-0.470927	0.546559	0.645743	-0.871552	-0.630968	84600000	35900000	45700000	49700000	130300000	85600000	8.11494	7.93247	67972	15100
O15014	1	Zinc finger protein 609 OS=Homo sapiens GN=ZNF609 PE=1 SV=2 - [ZN609_HUMAN]	O15014	S1313	Zinc finger protein 609	ZNF609 KIAA0295	ASHYKSKSPTISDKT	2	1.65698	0.494	0.674309	-1.01742	-0.568519	0.5	0.603506	-1	-0.728559	7410000	1700000	3660000	2510000	11070000	4210000	7.04415	6.62428	88917	164524
Q15942	1	Zyxin OS=Homo sapiens GN=ZYX PE=1 SV=1 - [ZYX_HUMAN]	Q15942	S259	Zyxin (Zyxin-2)	ZYX	PRGPPASSPAPAPKF	1.54617	1.65698	0.639	0.674309	-0.646112	-0.568519	0.646761	0.603506	-0.628695	-0.728559	2550000000	3520000000	1630000000	5220000000	4180000000	8740000000	9.62118	9.94151	103478	25619	CMGC/DYRK	HIPK3
[truncated: 56 more columns]
