# Supplementary material for: Quantitative global phosphoproteomics of human umbilical vein endothelial cells after activation of the Rap signaling pathway
Source: Royal Society of Chemistry journal article supplement (doi:10.1039/c3mb25524g), 2013-01-21
Supplement: c3mb25524g_11.xlsx [file c3mb25524g_11.xlsx]

## Sheet: Pathway Enrichment
Category	Term	Count	%	-Log10 p-Value	p-Value	Genes	List Total	Pop Hits	Pop Total
KEGG_PATHWAY	hsa04670:Leukocyte transendothelial migration	12	6.89655	6.33021	4.67505e-07	P55196, O00501, P50552, Q8WZA2, P18206, O60716, O75116, Q13464, P35221, O95398, P61224, P62834	48	45	1175
REACTOME_PATHWAY	REACT_13552:Integrin cell surface interactions	7	4.02299	2.72729	0.00187376	P18084, Q8WZA2, Q9Y490, P16144, O95398, P61224, P62834	42	31	906
KEGG_PATHWAY	hsa04520:Adherens junction	7	4.02299	2.33784	0.00459369	P55196, P18206, Q8WWI1, O60716, Q9UQB8, P35221, Q07157	48	41	1175
PANTHER_PATHWAY	P00027:Heterotrimeric G-protein signaling pathway-Gq alpha and Go alpha mediated pathway	8	4.5977	2.21443	0.00610341	Q14573, O94827, Q9Y3L5, P10114, Q12802, P61225, P61224, P62834	44	43	795
KEGG_PATHWAY	hsa04510:Focal adhesion	10	5.74713	2.17146	0.00673814	P18084, P50552, P18206, Q9Y490, O75116, Q13464, P16144, Q15942, P61224, P62834	48	89	1175
REACTOME_PATHWAY	REACT_11044:Signaling by Rho GTPases	8	4.5977	1.90964	0.0123128	Q52LW3, O94827, Q13459, Q96PE2, Q12802, Q9H7P9, A7KAX9, Q7Z6B7	42	58	906
BIOCARTA	h_rhoPathway:Rho cell motility signaling pathway	4	2.29885	1.89414	0.0127604	P18206, Q9Y490, Q13464, Q9UQB8	19	14	476
BIOCARTA	h_integrinPathway:Integrin Signaling Pathway	5	2.87356	1.83643	0.0145736	P18206, Q9Y490, Q13464, Q15942, P62834	19	27	476
PANTHER_PATHWAY	P00026:Heterotrimeric G-protein signaling pathway-Gi alpha and Gs alpha mediated pathway	7	4.02299	1.62699	0.0236051	Q93100, Q9Y3L5, P35367, P10114, P61225, P61224, P62834	44	43	795

## Sheet: GO BP Enrichment
Category	Term	Count	%	-Log10 p-Value	p-Value	Genes	List Total	Pop Hits	Pop Total
GOTERM_BP_FAT	GO:0007010~cytoskeleton organization	21	12.069	3.62769	0.00023567	Q9ULL8, Q9NXR1, Q96PE2, Q9Y490, Q8WWI1, O95425, Q13464, O43516, Q15154, Q14008, Q7Z460, Q9UBP0, Q13459, P50552, Q05682, P16949, Q27J81, O14639, O75116, Q14847, Q6ZNL6	129	217	3253
GOTERM_BP_FAT	GO:0007264~small GTPase mediated signal transduction	13	7.47126	3.15247	0.000703931	O75815, Q52LW3, Q8WZA2, Q13464, O95398, Q13459, Q9Y3L5, P10114, Q8IVT5, P61225, Q9UJU6, P62834, P61224	129	105	3253
GOTERM_BP_FAT	GO:0030031~cell projection assembly	7	4.02299	2.74689	0.00179108	P18206, Q13464, Q9UQB8, P16144, Q15154, Q9Y5K6, Q6ZNL6	129	34	3253
GOTERM_BP_FAT	GO:0007043~cell-cell junction assembly	4	2.29885	2.54021	0.00288262	P18206, Q9Y490, P35221, Q07157	129	8	3253
GOTERM_BP_FAT	GO:0030036~actin cytoskeleton organization	12	6.89655	2.27827	0.005269	Q9ULL8, P50552, Q13459, Q9Y490, Q05682, Q96PE2, Q27J81, Q8WWI1, O75116, Q13464, O43516, Q6ZNL6	129	116	3253
GOTERM_BP_FAT	GO:0007242~intracellular signaling cascade	27	15.5172	2.2117	0.00614181	O75815, Q52LW3, P35367, Q9UKE5, O95398, Q9Y2W1, O95819, Q96PK6, P10114, O00443, Q9BYB0, Q9UKA4, P61225, P61224, P62834, Q9UJU6, Q8WZA2, Q13464, Q15111, Q86SQ0, Q9Y3L5, Q13459, P16949, O75116, Q12802, Q8IVT5, Q15648	129	402	3253
GOTERM_BP_FAT	GO:0007155~cell adhesion	15	8.62069	2.18908	0.00647025	Q6V0I7, O00501, P18206, Q8WWI1, Q13464, P16144, P35221, Q9Y5K6, P48960, Q15942, P55196, P18084, O60716, Q13136, O00192	129	171	3253
GOTERM_BP_FAT	GO:0022610~biological adhesion	15	8.62069	2.18908	0.00647025	Q6V0I7, O00501, P18206, Q8WWI1, Q13464, P16144, P35221, Q9Y5K6, P48960, Q15942, P55196, P18084, O60716, Q13136, O00192	129	171	3253
GOTERM_BP_FAT	GO:0030029~actin filament-based process	12	6.89655	2.14032	0.00723902	Q9ULL8, P50552, Q13459, Q9Y490, Q05682, Q96PE2, Q27J81, Q8WWI1, O75116, Q13464, O43516, Q6ZNL6	129	121	3253
GOTERM_BP_FAT	GO:0045216~cell-cell junction organization	4	2.29885	1.99623	0.0100872	P18206, Q9Y490, P35221, Q07157	129	12	3253
GOTERM_BP_FAT	GO:0070507~regulation of microtubule cytoskeleton organization	5	2.87356	1.81752	0.0152223	Q7Z460, Q9Y6G9, P78559, O75116, P27816	129	25	3253
GOTERM_BP_FAT	GO:0032886~regulation of microtubule-based process	5	2.87356	1.64773	0.0225044	Q7Z460, Q9Y6G9, P78559, O75116, P27816	129	28	3253
GOTERM_BP_FAT	GO:0016192~vesicle-mediated transport	16	9.1954	1.61848	0.0240724	Q5SW96, Q9UJ41, Q8WZA2, Q6VY07, Q15276, O15155, P39880, O75146, Q99961, Q9UBP0, Q9P0V3, Q96Q42, O75396, P56962, Q9UJU6, Q9Y6I3	129	220	3253
GOTERM_BP_FAT	GO:0046847~filopodium assembly	3	1.72414	1.54769	0.0283343	Q9UQB8, P16144, Q6ZNL6	129	7	3253
GOTERM_BP_FAT	GO:0010324~membrane invagination	8	4.5977	1.4927	0.0321589	Q5SW96, Q99961, O75146, Q9P0V3, Q9UJ41, Q15276, Q9Y6I3, Q9UJU6	129	78	3253
GOTERM_BP_FAT	GO:0006897~endocytosis	8	4.5977	1.4927	0.0321589	Q5SW96, Q99961, O75146, Q9P0V3, Q9UJ41, Q15276, Q9Y6I3, Q9UJU6	129	78	3253
GOTERM_BP_FAT	GO:0030035~microspike assembly	3	1.72414	1.43394	0.0368181	Q9UQB8, P16144, Q6ZNL6	129	8	3253

## Sheet: GO CC Enrichment
Category	Term	Count	%	-Log10 p-value	p-Value	Genes	List Total	Pop Hits	Pop Total
GOTERM_CC_FAT	GO:0005856~cytoskeleton	47	27.0115	4.74073	1.81666e-05	Q9Y6G9, P18206, Q9UHD8, O95425, O43516, P27816, P35221, Q9Y5K6, Q9UBP0, O75146, O14639, P29474, Q9BYB0, P29966, Q9UKA4, Q9HCM4, Q5T1M5, Q9UJU6, Q9NQT8, Q9C0D5, Q9ULL8, Q5SW79, Q9Y490, P78559, Q9NXR1, Q13464, Q15154, Q14008, O43237, Q15942, A7KAX9, Q3KQU3, Q7Z460, Q96Q42, Q15149, P50552, Q13459, Q05682, Q9NSC5, Q8TD16, P16949, Q8NEY1, O75116, Q92614, Q14847, Q6ZNL6	128	580	2838
GOTERM_CC_FAT	GO:0044430~cytoskeletal part	35	20.1149	4.50184	3.14893e-05	Q9Y6G9, Q9UHD8, O95425, O43516, P27816, Q9Y5K6, Q9UBP0, Q9BYB0, P29966, Q9UKA4, Q5T1M5, Q9NQT8, Q9C0D5, Q9ULL8, Q5SW79, P78559, Q9NXR1, Q13464, Q15154, Q14008, O43237, Q15942, A7KAX9, Q3KQU3, Q7Z460, Q96Q42, Q13459, Q05682, Q9NSC5, P16949, Q8NEY1, O75116, Q92614, Q14847	128	381	2838
GOTERM_CC_FAT	GO:0015629~actin cytoskeleton	17	9.77011	3.75897	0.000174191	Q9ULL8, P18206, Q9UHD8, O95425, O43516, P35221, Q9Y5K6, Q15942, A7KAX9, Q13459, P50552, Q05682, O14639, Q92614, P29966, Q14847, Q5T1M5	128	131	2838
GOTERM_CC_FAT	GO:0030054~cell junction	18	10.3448	2.70171	0.00198742	Q9C0D5, O00501, P18206, Q9Y490, Q8WWI1, Q9UDY2, P35221, Q86UE4, Q15942, A7KAX9, P55196, Q8TDJ6, P50552, Q9NSC5, Q9BYB0, Q14847, Q9HCM4, Q07157	128	178	2838
GOTERM_CC_FAT	GO:0005884~actin filament	6	3.44828	2.62664	0.00236243	Q9ULL8, Q13459, Q05682, O43516, Q9Y5K6, Q5T1M5	128	22	2838
GOTERM_CC_FAT	GO:0014069~postsynaptic density	6	3.44828	2.45	0.00354817	Q9C0D5, Q96Q42, Q05682, Q9NSC5, Q9BYB0, A7KAX9	128	24	2838
GOTERM_CC_FAT	GO:0005886~plasma membrane	48	27.5862	2.43061	0.0037101	Q93100, Q14573, P35367, P18206, Q9UHD8, P28290, O95425, Q9UQB8, Q9UDY2, P35221, P48960, Q9Y5K6, Q53GL0, P55196, P18084, Q8TDJ6, P10114, O00443, P29474, Q9BYB0, O60716, Q9HCM4, P61225, Q8IUW5, Q07157, P62834, P61224, Q9Y6I3, Q9C0D5, Q5SW96, Q9ULL8, Q9Y219, O00501, Q9Y490, P52272, Q8WWI1, P16144, Q9H2G2, Q86UE4, Q15942, A7KAX9, Q15149, P50552, Q9Y3L5, Q05682, Q9NSC5, O75116, Q14847	128	741	2838
GOTERM_CC_FAT	GO:0005912~adherens junction	11	6.32184	2.35617	0.00440385	P55196, P50552, P18206, Q9Y490, Q8WWI1, Q9UDY2, P35221, Q15942, Q9HCM4, Q14847, Q07157	128	86	2838
GOTERM_CC_FAT	GO:0070161~anchoring junction	11	6.32184	2.21388	0.0061111	P55196, P50552, P18206, Q9Y490, Q8WWI1, Q9UDY2, P35221, Q15942, Q9HCM4, Q14847, Q07157	128	90	2838
GOTERM_CC_FAT	GO:0005874~microtubule	13	7.47126	2.16089	0.00690418	Q9NQT8, Q7Z460, Q9UBP0, Q5SW79, Q9Y6G9, Q9NXR1, P78559, Q9UHD8, P16949, Q8NEY1, P27816, O43237	128	121	2838
GOTERM_CC_FAT	GO:0001726~ruffle	7	4.02299	2.10658	0.0078238	Q96Q42, Q13459, Q9Y490, Q9UQB8, Q9Y5K6, Q6ZNL6, Q9UJU6	128	40	2838
GOTERM_CC_FAT	GO:0015630~microtubule cytoskeleton	21	12.069	2.08716	0.00818158	Q9NQT8, Q5SW79, Q9Y6G9, Q9NXR1, P78559, Q9UHD8, Q13464, P27816, Q15154, O43237, Q14008, Q3KQU3, Q7Z460, Q9UBP0, Q96Q42, P16949, Q8NEY1, P29966, O75116, Q9UKA4	128	255	2838
GOTERM_CC_FAT	GO:0044459~plasma membrane part	33	18.9655	1.99111	0.0102069	Q93100, Q14573, P18206, P35367, O95425, Q9UDY2, P35221, P48960, P55196, P18084, Q8TDJ6, P10114, P29474, Q9BYB0, P61225, Q9HCM4, Q07157, Q9C0D5, Q5SW96, Q9ULL8, O00501, Q9Y219, Q9Y490, P52272, Q8WWI1, P16144, Q86UE4, Q15942, A7KAX9, Q9Y3L5, P50552, Q9NSC5, Q14847	128	481	2838
GOTERM_CC_FAT	GO:0043232~intracellular non-membrane-bounded organelle	61	35.0575	1.9807	0.0104545	Q14573, Q9UHD8, O95425, O43516, P27816, P35221, Q96PK6, O75146, Q9UBP0, Q9P2K5, Q9BYB0, Q5T1M5, Q9UJU6, Q9C0D5, Q9NQT8, Q9ULL8, Q5SW79, Q9Y490, P22626, Q13464, Q15154, O43237, Q3KQU3, Q15149, Q13459, Q8TD16, Q05682, P16949, Q8N573, Q8NEY1, Q14847, Q9Y6G9, P18206, Q9Y5K6, Q9C0C2, Q9Y2W1, O43159, O14639, P29474, P29966, Q9UKA4, Q9HCM4, Q9NXR1, P78559, P10071, P52272, Q12888, Q14008, Q86UE4, Q15942,…	128	1052	2838
GOTERM_CC_FAT	GO:0043228~non-membrane-bounded organelle	61	35.0575	1.9807	0.0104545	Q14573, Q9UHD8, O95425, O43516, P27816, P35221, Q96PK6, O75146, Q9UBP0, Q9P2K5, Q9BYB0, Q5T1M5, Q9UJU6, Q9C0D5, Q9NQT8, Q9ULL8, Q5SW79, Q9Y490, P22626, Q13464, Q15154, O43237, Q3KQU3, Q15149, Q13459, Q8TD16, Q05682, P16949, Q8N573, Q8NEY1, Q14847, Q9Y6G9, P18206, Q9Y5K6, Q9C0C2, Q9Y2W1, O43159, O14639, P29474, P29966, Q9UKA4, Q9HCM4, Q9NXR1, P78559, P10071, P52272, Q12888, Q14008, Q86UE4, Q15942,…	128	1052	2838
GOTERM_CC_FAT	GO:0005911~cell-cell junction	9	5.17241	1.85917	0.0138303	P55196, O00501, P18206, Q9Y490, Q8WWI1, Q9UDY2, Q86UE4, Q15942, Q07157	128	72	2838
GOTERM_CC_FAT	GO:0044456~synapse part	8	4.5977	1.78842	0.0162771	Q9C0D5, Q96Q42, Q8TDJ6, Q9Y2H0, Q05682, Q9NSC5, Q9BYB0, A7KAX9	128	60	2838
GOTERM_CC_FAT	GO:0048471~perinuclear region of cytoplasm	11	6.32184	1.73165	0.0185502	Q5U651, Q9Y219, Q9HBD1, O75146, Q9UBP0, O94827, Q13459, Q13625, Q9UHD8, Q86UE4, Q9Y5K6	128	106	2838
GOTERM_CC_FAT	GO:0031252~cell leading edge	9	5.17241	1.6045	0.0248602	Q96Q42, P50552, Q13459, Q9Y490, O60716, Q9UQB8, Q9Y5K6, Q6ZNL6, Q9UJU6	128	80	2838
GOTERM_CC_FAT	GO:0045211~postsynaptic membrane	5	2.87356	1.57493	0.0266113	Q9C0D5, Q9Y2H0, Q9NSC5, Q9BYB0, A7KAX9	128	26	2838
GOTERM_CC_FAT	GO:0044450~microtubule organizing center part	5	2.87356	1.52018	0.030187	Q7Z460, Q5SW79, Q13464, Q15154, Q14008	128	27	2838
GOTERM_CC_FAT	GO:0005813~centrosome	11	6.32184	1.48728	0.0325628	Q7Z460, Q9UBP0, Q5SW79, Q96Q42, Q9NXR1, O75116, Q13464, P29966, Q15154, Q14008, Q9UKA4	128	116	2838
GOTERM_CC_FAT	GO:0005769~early endosome	6	3.44828	1.46688	0.034129	Q5SW96, Q96Q42, Q9UJ41, Q15276, Q5T1M5, Q4V328	128	41	2838
GOTERM_CC_FAT	GO:0005794~Golgi apparatus	19	10.9195	1.40325	0.0395143	Q5SW96, Q96JH7, Q6VY07, O15155, Q13464, Q15751, P39880, A7KAX9, Q5U651, Q7Z460, O75396, Q8TD16, O00443, Q9P2K5, P29474, Q92614, P53367, P53671, Q6ZNL6	128	261	2838
GOTERM_CC_FAT	GO:0005938~cell cortex	8	4.5977	1.39853	0.039946	Q9ULL8, Q7Z460, Q13459, Q05682, P29966, Q14847, A7KAX9, Q9UJU6	128	72	2838
GOTERM_CC_FAT	GO:0009898~internal side of plasma membrane	11	6.32184	1.35763	0.0438906	Q93100, Q9ULL8, P18206, Q9Y3L5, Q9Y490, P10114, O95425, Q9UDY2, P35221, P61225, Q07157	128	122	2838
GOTERM_CC_FAT	GO:0016323~basolateral plasma membrane	9	5.17241	1.33838	0.0458797	Q5SW96, Q9ULL8, P50552, P18206, Q9Y490, P16144, Q15942, Q14847, Q07157	128	90	2838
GOTERM_CC_FAT	GO:0031941~filamentous actin	3	1.72414	1.33155	0.0466065	Q9ULL8, Q13459, Q9Y5K6	128	8	2838
GOTERM_CC_FAT	GO:0005815~microtubule organizing center	11	6.32184	1.31694	0.0482013	Q7Z460, Q9UBP0, Q5SW79, Q96Q42, Q9NXR1, O75116, Q13464, P29966, Q15154, Q14008, Q9UKA4	128	124	2838

## Sheet: GO MF Enrichment
Category	Term	Count	%	-Log10 p-value	p-Value	Genes	List Total	Pop Hits	Pop Total
GOTERM_MF_FAT	GO:0008092~cytoskeletal protein binding	28	16.092	6.29166	5.10908e-07	P18206, O95425, P28290, O43516, Q9UQB8, P35221, Q9C0C2, O75146, Q9UBP0, O14639, P29474, P29966, Q9HCM4, Q9UJU6, Q9ULL8, O75167, P78559, Q9Y490, Q9NXR1, Q8WWI1, Q7Z460, Q15149, Q13459, P50552, Q05682, P16949, Q27J81, Q14847	122	251	3124
GOTERM_MF_FAT	GO:0003779~actin binding	20	11.4943	4.76079	1.73463e-05	Q9ULL8, O75167, P18206, P78559, Q9Y490, Q8WWI1, P28290, O95425, O43516, O75146, Q15149, Q13459, P50552, Q05682, Q27J81, O14639, P29474, P29966, Q14847, Q9UJU6	122	169	3124
GOTERM_MF_FAT	GO:0030695~GTPase regulator activity	20	11.4943	3.38111	0.00041581	O75815, Q52LW3, O94827, O60343, Q8WZA2, Q96PE2, Q15276, Q15751, Q9H7P9, Q9UKE5, A7KAX9, O95398, O95819, Q96Q42, Q8TDJ6, Q13459, Q2PPJ7, Q12802, Q6ZNL6, Q7Z6B7	122	213	3124
GOTERM_MF_FAT	GO:0060589~nucleoside-triphosphatase regulator activity	20	11.4943	3.30345	0.000497225	O75815, Q52LW3, O94827, O60343, Q8WZA2, Q96PE2, Q15276, Q15751, Q9H7P9, Q9UKE5, A7KAX9, O95398, O95819, Q96Q42, Q8TDJ6, Q13459, Q2PPJ7, Q12802, Q6ZNL6, Q7Z6B7	122	216	3124
GOTERM_MF_FAT	GO:0005085~guanyl-nucleotide exchange factor activity	10	5.74713	2.37099	0.00425608	O75815, O94827, Q96Q42, Q8WZA2, Q96PE2, Q15751, Q12802, Q9H7P9, O95398, Q6ZNL6	122	83	3124
GOTERM_MF_FAT	GO:0051015~actin filament binding	6	3.44828	2.21671	0.00607147	Q9ULL8, Q13459, O95425, P29966, Q14847, Q9UJU6	122	31	3124
GOTERM_MF_FAT	GO:0008289~lipid binding	12	6.89655	2.14122	0.00722412	Q99961, O75146, Q52LW3, Q14573, Q13459, O00443, O75116, Q13464, Q8IVT5, Q12802, A7KAX9, Q9Y6I3	122	123	3124
GOTERM_MF_FAT	GO:0019992~diacylglycerol binding	6	3.44828	2.04267	0.00906414	Q52LW3, Q13459, O75116, Q13464, Q8IVT5, Q12802	122	34	3124
GOTERM_MF_FAT	GO:0005083~small GTPase regulator activity	13	7.47126	1.96163	0.0109237	Q52LW3, O94827, O60343, Q96PE2, Q15751, Q9H7P9, Q9UKE5, O95819, Q96Q42, Q8TDJ6, Q13459, Q12802, Q6ZNL6	122	148	3124
GOTERM_MF_FAT	GO:0005089~Rho guanyl-nucleotide exchange factor activity	6	3.44828	1.62359	0.0237907	O94827, Q96Q42, Q96PE2, Q12802, Q9H7P9, Q6ZNL6	122	43	3124
GOTERM_MF_FAT	GO:0031267~small GTPase binding	7	4.02299	1.60016	0.0251094	Q96Q42, Q8TDJ6, Q13459, Q27J81, Q13464, Q6ZNL6, P62834	122	59	3124
GOTERM_MF_FAT	GO:0051020~GTPase binding	7	4.02299	1.44662	0.0357586	Q96Q42, Q8TDJ6, Q13459, Q27J81, Q13464, Q6ZNL6, P62834	122	64	3124
GOTERM_MF_FAT	GO:0005088~Ras guanyl-nucleotide exchange factor activity	6	3.44828	1.31111	0.0488527	O94827, Q96Q42, Q96PE2, Q12802, Q9H7P9, Q6ZNL6	122	52	3124
